# Supplementary material for: Fibrinogen αC-subregions critically contribute blood clot fibre growth, mechanical stability, and resistance to fibrinolysis
Source: eLife. 2021 Oct 11;10:e68761. doi: 10.7554/eLife.68761 (PMC8553339; doi:10.7554/eLife.68761)
Supplement: Figure 1—source data 1. [file elife-68761-fig1-data1.xlsx]

## Sheet: Figure 1 source data 
Figure 1 C				Figure 1 D
	WT											a 390														a220
Time	Experiment 1	Experiment 1	Experiment 1	Experiment 2	Experiment 2	Experiment 3	Experiment 3	Experiment 3	Experiment 4	Experiment 4		Time	Experiment 1	Experiment 1	Experiment 1	Experiment 2	Experiment 2	Experiment 2	Experiment 3	Experiment 3	Experiment 3	Experiment 4	Experiment 4	Experiment 4		Time	Experiment 1	Experiment 1	Experiment 1	Experiment 2	Experiment 2	Experiment 2	Experiment 3	Experiment 3	Experiment 3	Experiment 4	Experiment 4	Experiment 4
00:00:03	0	0	0	0	0	0	0	0	0	0		00:00:03	0	0	0	0	0	0	0	0	0	0	0	0		00:00:03	0	0	0	0	0	0	0	0	0	0	0	0		Figure 1E	WT				a390				a220
00:00:15	0.001	0.002	0.001	0	-0.002	0	0	0.001	-0.001	-0.001		00:00:15	-0.001	0.004	0	0.001	0	-0.001	0	0	0	0.001	-0.001	0.01		00:00:15	-0.001	0.001	-0.002	0.004	0.001	0.002	0.001	0	0.001	-0.001	0.001	0		Lag phase	Exp 1	Exp 2	Exp 3	Exp 4	Exp 1	Exp 2	Exp 3	Exp 4	Exp 1
00:00:27	0.001	0.002	-0.002	0.002	0	0	0	0.001	0	-0.001		00:00:27	-0.005	0.002	-0.001	0.001	0	0	0	0	0	0	0.002	0.003		00:00:27	-0.002	-0.001	-0.002	0.001	-0.001	0.005	0.001	0	0.001	0	0.001	0.001			154	150	176	118	200	190	190	272	240
00:00:39	0.001	0.002	-0.002	0.003	-0.003	0	0.001	0.001	0	-0.002		00:00:39	-0.001	-0.002	0	0.001	0	0	0	0	0	0.001	0	0.01		00:00:39	-0.002	-0.001	-0.002	0.001	-0.001	0.01	0.001	0	0.001	-0.001	0.001	0			178	174	164	142	188	190	202	260	228
00:00:51	0.001	0.001	-0.002	0.001	-0.001	0	0	0.001	0	-0.002		00:00:51	-0.001	0.006	0	0.001	0.001	0	0	0	0.001	0.001	0.002	0.002		00:00:51	-0.001	0.001	-0.001	0.002	0.001	-0.001	0.001	0	0.001	-0.001	0.001	0.001			190		176		188	190	214	32	240
00:01:03	0.001	0.002	-0.001	0.001	-0.001	0	0	0.001	0	-0.005		00:01:03	-0.002	0.001	0	0.001	0	0	0	0	0.001	0.001	0	0.003		00:01:03	-0.002	-0.001	-0.003	-0.004	-0.001	0.001	0.001	0	0.001	0	0.001	0.001
00:01:15	0.001	0.002	-0.001	0.003	-0.001	0	0.001	0.001	0.001	-0.003		00:01:15	-0.007	0	-0.002	0.001	0.001	0	0	0.001	0	0.001	0	0.006		00:01:15	-0.002	0	-0.003	-0.005	0	0.003	0.002	0	0.001	-0.001	0.002	0		Figure 1F	WT				a390				a220
00:01:27	0.001	0.001	-0.004	0.002	0	0	0.001	0.001	0.004	-0.003		00:01:27	-0.003	0	0	0.001	0	0	0.001	0.001	0.001	0.001	0.002	0		00:01:27	-0.002	0	-0.002	0	0	0.001	0.002	0.001	0.001	0	0.002	0.001		MaxOD	Exp 1	Exp 2	Exp 3	Exp 4	Exp 1	Exp 2	Exp 3	Exp 4	Exp 1
00:01:39	0.001	0	-0.002	0.008	-0.003	0.001	0.002	0.002	0.009	0		00:01:39	-0.002	-0.002	0	0.001	0	0	0.001	0.001	0.001	0.002	0.002	0.013		00:01:39	-0.002	-0.001	-0.003	-0.007	-0.001	0.01	0.003	0.001	0.002	0	0.002	0.001			0.505	0.34	0.337	0.367	0.124	0.151	0.235	0.19	0.369
00:01:51	0.002	0.001	-0.002	0.006	0	0.001	0.003	0.002	0.016	0.002		00:01:51	-0.003	0.007	0	0.001	0.002	0.001	0	0	0.001	0.001	0.002	0.002		00:01:51	-0.003	-0.001	-0.004	-0.004	-0.001	-0.003	0.003	0.001	0.002	0	0.002	0.001			0.356	0.348	0.296	0.375	0.146	0.13	0.201	0.181	0.378
00:02:03	0.003	0.001	-0.003	0.011	0.006	0.003	0.005	0.003	0.024	0.006		00:02:03	-0.002	0.001	0.001	0.002	0.002	0.002	0.001	0.001	0.002	0.001	-0.001	0.002		00:02:03	-0.002	-0.001	-0.003	-0.009	-0.001	-0.001	0.003	0.001	0.002	0	0.002	0.001			0.329		0.335		0.161	0.138	0.211	0.153	0.356
00:02:15	0.006	0.002	-0.003	0.016	0.009	0.006	0.007	0.005	0.035	0.014		00:02:15	-0.002	0.009	0.003	0.002	0.003	0.003	0.001	0.001	0.001	0.002	0.001	0.008		00:02:15	-0.002	-0.001	-0.004	-0.009	-0.001	-0.002	0.003	0.001	0.002	0	0.002	0
00:02:27	0.01	0.005	-0.001	0.023	0.015	0.009	0.012	0.008	0.046	0.018		00:02:27	-0.003	0.007	0.004	0.003	0.004	0.005	0.002	0.001	0.001	0.001	0.001	0		00:02:27	-0.003	-0.001	-0.004	-0.003	-0.001	0	0.003	0.001	0.002	0.001	0.002	0.001
00:02:39	0.015	0.008	0.004	0.031	0.018	0.014	0.019	0.013	0.059	0.024		00:02:39	0.004	0.009	0.009	0.005	0.006	0.007	0.004	0.002	0.002	0.002	0.002	0.007		00:02:39	-0.003	-0.002	-0.004	-0.007	-0.002	0.004	0.003	0.002	0.002	0.001	0.002	0.001
00:02:51	0.021	0.012	0.009	0.036	0.026	0.021	0.027	0.019	0.073	0.037		00:02:51	0.003	0.021	0.01	0.007	0.009	0.009	0.007	0.005	0.002	0.002	0.002	0.002		00:02:51	-0.001	0	-0.003	-0.003	0	-0.004	0.004	0.005	0.002	0	0.002	0
00:03:03	0.028	0.017	0.018	0.044	0.034	0.027	0.037	0.027	0.086	0.047		00:03:03	0.01	0.019	0.014	0.01	0.012	0.012	0.011	0.009	0.005	0.003	0.002	-0.001		00:03:03	-0.001	0	-0.003	0.002	0	-0.005	0.005	0.007	0.002	0.001	0.002	0.001
00:03:15	0.038	0.024	0.028	0.054	0.037	0.034	0.049	0.036	0.099	0.061		00:03:15	0.012	0.022	0.016	0.014	0.016	0.014	0.018	0.013	0.007	0.004	0.002	0.006		00:03:15	0	0.002	-0.001	0.002	0.002	0	0.007	0.011	0.003	0	0.002	0.001
00:03:27	0.049	0.03	0.038	0.065	0.049	0.042	0.059	0.046	0.111	0.071		00:03:27	0.017	0.028	0.02	0.018	0.02	0.018	0.025	0.018	0.012	0.005	0.003	0.001		00:03:27	0.002	0.006	0.001	0.011	0.006	0.005	0.009	0.019	0.004	0.002	0.003	0.004
00:03:39	0.062	0.039	0.049	0.074	0.055	0.051	0.07	0.057	0.124	0.087		00:03:39	0.025	0.029	0.024	0.023	0.025	0.022	0.032	0.024	0.017	0.006	0.005	0.01		00:03:39	0.005	0.008	0.004	0.012	0.008	0.001	0.014	0.029	0.007	0.005	0.004	0.007
00:03:51	0.074	0.049	0.064	0.085	0.064	0.061	0.08	0.067	0.135	0.096		00:03:51	0.026	0.037	0.028	0.028	0.03	0.026	0.04	0.029	0.023	0.007	0.007	0.003		00:03:51	0.007	0.013	0.007	0.018	0.013	0.007	0.019	0.04	0.012	0.011	0.006	0.011
00:04:03	0.089	0.058	0.074	0.093	0.076	0.07	0.091	0.077	0.147	0.111		00:04:03	0.033	0.042	0.031	0.033	0.034	0.031	0.048	0.035	0.029	0.009	0.01	0.006		00:04:03	0.011	0.02	0.015	0.019	0.02	0.005	0.028	0.052	0.02	0.022	0.008	0.018
00:04:15	0.103	0.068	0.084	0.107	0.08	0.079	0.1	0.087	0.158	0.12		00:04:15	0.036	0.045	0.036	0.037	0.038	0.035	0.055	0.041	0.036	0.011	0.013	0.013		00:04:15	0.016	0.029	0.026	0.023	0.029	0.024	0.04	0.066	0.031	0.032	0.013	0.027
00:04:27	0.112	0.077	0.092	0.114	0.094	0.089	0.109	0.097	0.168	0.133		00:04:27	0.041	0.053	0.04	0.042	0.043	0.039	0.062	0.047	0.042	0.014	0.019	0.012		00:04:27	0.023	0.04	0.04	0.036	0.04	0.023	0.056	0.082	0.044	0.043	0.019	0.037
00:04:39	0.124	0.087	0.104	0.125	0.099	0.097	0.118	0.106	0.179	0.143		00:04:39	0.046	0.053	0.043	0.046	0.046	0.043	0.068	0.053	0.049	0.019	0.025	0.022		00:04:39	0.029	0.051	0.052	0.035	0.051	0.037	0.071	0.095	0.059	0.054	0.026	0.049
00:04:51	0.136	0.097	0.112	0.132	0.11	0.106	0.127	0.115	0.188	0.153		00:04:51	0.05	0.061	0.048	0.051	0.051	0.047	0.075	0.058	0.054	0.022	0.029	0.017		00:04:51	0.039	0.063	0.065	0.04	0.063	0.046	0.085	0.106	0.075	0.065	0.034	0.06
00:05:03	0.147	0.105	0.12	0.14	0.119	0.114	0.134	0.124	0.198	0.163		00:05:03	0.056	0.061	0.052	0.054	0.054	0.05	0.082	0.064	0.061	0.026	0.035	0.021		00:05:03	0.048	0.074	0.077	0.046	0.074	0.054	0.098	0.117	0.09	0.077	0.044	0.072
00:05:15	0.159	0.115	0.13	0.151	0.126	0.122	0.142	0.132	0.205	0.172		00:05:15	0.057	0.072	0.056	0.058	0.057	0.054	0.088	0.069	0.067	0.031	0.04	0.034		00:05:15	0.059	0.086	0.09	0.056	0.086	0.074	0.111	0.127	0.106	0.088	0.054	0.082
00:05:27	0.17	0.124	0.139	0.159	0.135	0.131	0.15	0.141	0.215	0.183		00:05:27	0.06	0.068	0.059	0.062	0.061	0.057	0.094	0.074	0.072	0.034	0.046	0.025		00:05:27	0.069	0.097	0.102	0.069	0.097	0.08	0.124	0.138	0.12	0.098	0.067	0.093
00:05:39	0.183	0.133	0.15	0.169	0.142	0.139	0.158	0.149	0.221	0.188		00:05:39	0.066	0.074	0.064	0.066	0.063	0.06	0.1	0.079	0.078	0.039	0.049	0.033		00:05:39	0.08	0.106	0.113	0.073	0.106	0.098	0.136	0.148	0.134	0.107	0.079	0.102
00:05:51	0.193	0.142	0.156	0.174	0.151	0.146	0.164	0.157	0.229	0.2		00:05:51	0.067	0.081	0.067	0.07	0.067	0.063	0.105	0.084	0.083	0.043	0.052	0.036		00:05:51	0.09	0.117	0.122	0.084	0.117	0.107	0.147	0.159	0.146	0.114	0.089	0.111
00:06:03	0.205	0.15	0.163	0.18	0.159	0.153	0.17	0.164	0.236	0.206		00:06:03	0.074	0.08	0.071	0.073	0.069	0.067	0.111	0.089	0.088	0.047	0.059	0.035		00:06:03	0.102	0.128	0.133	0.086	0.128	0.117	0.159	0.169	0.157	0.12	0.1	0.119
00:06:15	0.216	0.158	0.171	0.188	0.167	0.16	0.177	0.171	0.244	0.216		00:06:15	0.072	0.083	0.074	0.076	0.072	0.069	0.115	0.093	0.093	0.052	0.063	0.054		00:06:15	0.111	0.136	0.14	0.097	0.136	0.129	0.171	0.179	0.167	0.128	0.111	0.128
00:06:27	0.228	0.166	0.179	0.194	0.175	0.167	0.182	0.178	0.249	0.223		00:06:27	0.077	0.09	0.078	0.079	0.074	0.072	0.12	0.097	0.098	0.055	0.067	0.046		00:06:27	0.119	0.145	0.149	0.111	0.145	0.139	0.181	0.191	0.176	0.137	0.121	0.136
00:06:39	0.24	0.174	0.185	0.201	0.177	0.174	0.188	0.185	0.255	0.227		00:06:39	0.081	0.089	0.081	0.082	0.078	0.074	0.125	0.101	0.102	0.059	0.07	0.051		00:06:39	0.127	0.153	0.156	0.113	0.153	0.152	0.191	0.2	0.186	0.145	0.129	0.143
00:06:51	0.25	0.182	0.195	0.209	0.187	0.18	0.194	0.191	0.261	0.238		00:06:51	0.081	0.095	0.084	0.085	0.08	0.077	0.13	0.106	0.107	0.063	0.074	0.06		00:06:51	0.135	0.161	0.164	0.122	0.161	0.165	0.2	0.211	0.195	0.153	0.138	0.151
00:07:03	0.26	0.188	0.198	0.215	0.196	0.186	0.198	0.197	0.267	0.244		00:07:03	0.086	0.095	0.088	0.088	0.081	0.08	0.134	0.11	0.111	0.067	0.079	0.059		00:07:03	0.141	0.171	0.171	0.127	0.171	0.176	0.21	0.219	0.204	0.16	0.146	0.158
00:07:15	0.27	0.195	0.204	0.22	0.2	0.192	0.204	0.203	0.271	0.249		00:07:15	0.085	0.097	0.09	0.091	0.084	0.082	0.139	0.114	0.115	0.071	0.083	0.063		00:07:15	0.149	0.178	0.179	0.138	0.178	0.18	0.222	0.226	0.213	0.167	0.155	0.165
00:07:27	0.278	0.202	0.211	0.224	0.208	0.198	0.208	0.208	0.276	0.255		00:07:27	0.087	0.099	0.093	0.093	0.086	0.084	0.143	0.117	0.12	0.074	0.086	0.065		00:07:27	0.156	0.187	0.186	0.149	0.187	0.187	0.232	0.234	0.221	0.174	0.162	0.172
00:07:39	0.288	0.208	0.216	0.229	0.212	0.202	0.212	0.214	0.281	0.26		00:07:39	0.093	0.104	0.097	0.096	0.088	0.086	0.147	0.12	0.123	0.078	0.09	0.067		00:07:39	0.162	0.194	0.193	0.151	0.194	0.193	0.242	0.241	0.23	0.182	0.169	0.18
00:07:51	0.296	0.214	0.221	0.234	0.219	0.208	0.217	0.219	0.286	0.268		00:07:51	0.093	0.111	0.1	0.098	0.09	0.088	0.15	0.124	0.127	0.082	0.091	0.076		00:07:51	0.17	0.202	0.2	0.16	0.202	0.2	0.251	0.249	0.238	0.188	0.175	0.185
00:08:03	0.304	0.219	0.226	0.239	0.225	0.212	0.221	0.224	0.289	0.271		00:08:03	0.095	0.106	0.101	0.101	0.091	0.091	0.154	0.127	0.13	0.085	0.095	0.075		00:08:03	0.176	0.211	0.206	0.163	0.211	0.208	0.259	0.254	0.246	0.194	0.183	0.191
00:08:15	0.312	0.226	0.231	0.246	0.227	0.217	0.224	0.228	0.293	0.277		00:08:15	0.094	0.109	0.104	0.102	0.093	0.092	0.157	0.13	0.134	0.088	0.101	0.077		00:08:15	0.184	0.219	0.212	0.17	0.219	0.22	0.266	0.26	0.253	0.2	0.191	0.196
00:08:27	0.319	0.231	0.236	0.247	0.235	0.222	0.228	0.233	0.298	0.282		00:08:27	0.096	0.109	0.106	0.105	0.095	0.094	0.161	0.133	0.137	0.092	0.102	0.088		00:08:27	0.192	0.226	0.219	0.18	0.226	0.223	0.274	0.265	0.262	0.205	0.198	0.202
00:08:39	0.327	0.235	0.24	0.252	0.236	0.227	0.231	0.238	0.3	0.285		00:08:39	0.101	0.112	0.109	0.106	0.097	0.096	0.163	0.136	0.14	0.094	0.105	0.081		00:08:39	0.196	0.233	0.223	0.184	0.233	0.23	0.281	0.271	0.269	0.21	0.205	0.208
00:08:51	0.334	0.241	0.245	0.257	0.243	0.231	0.235	0.241	0.304	0.291		00:08:51	0.101	0.117	0.111	0.108	0.098	0.097	0.166	0.138	0.143	0.098	0.109	0.086		00:08:51	0.203	0.24	0.229	0.191	0.24	0.238	0.288	0.275	0.276	0.215	0.212	0.213
00:09:03	0.34	0.246	0.248	0.26	0.25	0.235	0.238	0.246	0.307	0.295		00:09:03	0.103	0.115	0.113	0.11	0.099	0.099	0.169	0.141	0.146	0.101	0.11	0.093		00:09:03	0.208	0.246	0.233	0.2	0.246	0.244	0.294	0.28	0.283	0.22	0.219	0.218
00:09:15	0.347	0.25	0.252	0.265	0.252	0.239	0.241	0.249	0.309	0.295		00:09:15	0.102	0.116	0.115	0.112	0.101	0.1	0.172	0.143	0.148	0.104	0.114	0.09		00:09:15	0.213	0.251	0.238	0.205	0.251	0.251	0.301	0.285	0.289	0.223	0.224	0.222
00:09:27	0.353	0.254	0.256	0.266	0.257	0.243	0.243	0.253	0.313	0.301		00:09:27	0.105	0.118	0.117	0.113	0.102	0.102	0.175	0.146	0.151	0.107	0.116	0.101		00:09:27	0.218	0.257	0.242	0.214	0.257	0.253	0.306	0.289	0.294	0.228	0.23	0.228
00:09:39	0.358	0.258	0.258	0.27	0.257	0.246	0.246	0.256	0.314	0.301		00:09:39	0.107	0.119	0.118	0.115	0.103	0.103	0.177	0.148	0.154	0.109	0.119	0.092		00:09:39	0.223	0.261	0.246	0.222	0.261	0.259	0.312	0.293	0.3	0.231	0.236	0.232
00:09:51	0.364	0.263	0.262	0.272	0.262	0.25	0.248	0.26	0.318	0.309		00:09:51	0.105	0.123	0.12	0.116	0.104	0.104	0.179	0.15	0.156	0.111	0.121	0.097		00:09:51	0.228	0.266	0.251	0.227	0.266	0.263	0.317	0.297	0.306	0.235	0.242	0.236
00:10:03	0.37	0.267	0.265	0.276	0.269	0.253	0.251	0.263	0.321	0.312		00:10:03	0.11	0.122	0.122	0.118	0.106	0.106	0.182	0.152	0.158	0.115	0.122	0.108		00:10:03	0.233	0.272	0.253	0.231	0.272	0.27	0.322	0.3	0.311	0.238	0.246	0.24
00:10:15	0.375	0.271	0.269	0.282	0.268	0.256	0.253	0.266	0.322	0.313		00:10:15	0.109	0.123	0.124	0.119	0.107	0.107	0.184	0.154	0.16	0.117	0.125	0.101		00:10:15	0.237	0.276	0.257	0.236	0.276	0.283	0.327	0.304	0.316	0.242	0.252	0.244
00:10:27	0.379	0.274	0.27	0.281	0.276	0.26	0.255	0.269	0.325	0.317		00:10:27	0.108	0.124	0.125	0.12	0.107	0.108	0.186	0.156	0.162	0.119	0.127	0.103		00:10:27	0.242	0.282	0.261	0.252	0.282	0.278	0.331	0.308	0.32	0.245	0.256	0.247
00:10:39	0.384	0.277	0.274	0.285	0.275	0.262	0.257	0.272	0.327	0.322		00:10:39	0.111	0.125	0.126	0.122	0.108	0.11	0.188	0.158	0.165	0.123	0.129	0.115		00:10:39	0.246	0.286	0.264	0.248	0.286	0.286	0.335	0.31	0.324	0.248	0.261	0.251
00:10:51	0.389	0.281	0.275	0.285	0.279	0.265	0.259	0.275	0.328	0.322		00:10:51	0.112	0.13	0.129	0.123	0.11	0.11	0.19	0.16	0.166	0.124	0.132	0.109		00:10:51	0.252	0.29	0.268	0.256	0.29	0.287	0.339	0.313	0.328	0.251	0.266	0.255
00:11:03	0.393	0.283	0.281	0.289	0.284	0.268	0.26	0.277	0.331	0.326		00:11:03	0.111	0.131	0.129	0.124	0.11	0.112	0.192	0.161	0.168	0.127	0.134	0.115		00:11:03	0.254	0.294	0.269	0.258	0.294	0.29	0.343	0.316	0.332	0.254	0.269	0.259
00:11:15	0.397	0.287	0.281	0.294	0.284	0.271	0.262	0.28	0.333	0.329		00:11:15	0.112	0.127	0.131	0.125	0.111	0.113	0.194	0.163	0.17	0.128	0.134	0.111		00:11:15	0.26	0.297	0.273	0.266	0.297	0.303	0.346	0.318	0.335	0.256	0.274	0.261
00:11:27	0.401	0.29	0.284	0.293	0.29	0.274	0.264	0.282	0.334	0.331		00:11:27	0.112	0.128	0.131	0.126	0.112	0.114	0.195	0.165	0.172	0.13	0.138	0.113		00:11:27	0.264	0.302	0.276	0.276	0.302	0.299	0.351	0.322	0.339	0.259	0.277	0.264
00:11:39	0.405	0.292	0.287	0.295	0.29	0.276	0.266	0.284	0.335	0.332		00:11:39	0.117	0.129	0.134	0.127	0.112	0.115	0.197	0.166	0.173	0.132	0.137	0.118		00:11:39	0.269	0.305	0.278	0.273	0.305	0.303	0.354	0.324	0.342	0.261	0.28	0.267
00:11:51	0.408	0.295	0.287	0.299	0.293	0.278	0.267	0.286	0.336	0.332		00:11:51	0.113	0.134	0.134	0.128	0.114	0.115	0.198	0.167	0.175	0.133	0.14	0.115		00:11:51	0.273	0.309	0.281	0.278	0.309	0.309	0.356	0.326	0.345	0.263	0.284	0.27
00:12:03	0.412	0.298	0.29	0.298	0.296	0.281	0.268	0.288	0.338	0.337		00:12:03	0.114	0.131	0.135	0.129	0.114	0.117	0.2	0.169	0.176	0.136	0.142	0.118		00:12:03	0.276	0.313	0.282	0.278	0.313	0.307	0.36	0.328	0.349	0.265	0.288	0.274
00:12:15	0.416	0.3	0.292	0.301	0.297	0.283	0.27	0.291	0.34	0.34		00:12:15	0.114	0.13	0.136	0.13	0.115	0.117	0.201	0.17	0.178	0.139	0.143	0.127		00:12:15	0.28	0.313	0.284	0.284	0.313	0.314	0.364	0.33	0.351	0.267	0.291	0.276
00:12:27	0.419	0.302	0.294	0.302	0.299	0.285	0.271	0.292	0.341	0.342		00:12:27	0.115	0.129	0.136	0.131	0.116	0.118	0.202	0.171	0.179	0.139	0.146	0.121		00:12:27	0.285	0.318	0.287	0.291	0.318	0.314	0.367	0.333	0.354	0.269	0.294	0.278
00:12:39	0.422	0.305	0.295	0.304	0.301	0.287	0.272	0.294	0.341	0.34		00:12:39	0.116	0.133	0.138	0.132	0.116	0.119	0.204	0.172	0.18	0.141	0.146	0.128		00:12:39	0.289	0.321	0.289	0.288	0.321	0.318	0.37	0.335	0.357	0.27	0.297	0.281
00:12:51	0.425	0.307	0.296	0.306	0.303	0.289	0.274	0.296	0.343	0.344		00:12:51	0.118	0.135	0.139	0.133	0.117	0.12	0.205	0.173	0.181	0.143	0.147	0.124		00:12:51	0.292	0.324	0.291	0.291	0.324	0.32	0.372	0.337	0.359	0.272	0.299	0.283
00:13:03	0.427	0.309	0.297	0.308	0.308	0.29	0.274	0.297	0.345	0.347		00:13:03	0.116	0.132	0.14	0.133	0.116	0.12	0.206	0.174	0.182	0.144	0.149	0.124		00:13:03	0.295	0.327	0.293	0.3	0.327	0.327	0.374	0.338	0.361	0.274	0.302	0.285
00:13:15	0.43	0.311	0.299	0.31	0.308	0.293	0.276	0.299	0.345	0.347		00:13:15	0.118	0.132	0.141	0.134	0.118	0.121	0.208	0.175	0.185	0.147	0.15	0.132		00:13:15	0.299	0.329	0.295	0.298	0.329	0.328	0.378	0.34	0.364	0.276	0.305	0.288
00:13:27	0.433	0.313	0.303	0.31	0.309	0.294	0.277	0.301	0.345	0.345		00:13:27	0.118	0.138	0.141	0.134	0.118	0.121	0.209	0.177	0.186	0.147	0.151	0.128		00:13:27	0.302	0.331	0.296	0.303	0.331	0.329	0.38	0.342	0.365	0.278	0.307	0.289
00:13:39	0.435	0.314	0.302	0.314	0.31	0.296	0.277	0.302	0.348	0.351		00:13:39	0.12	0.133	0.142	0.136	0.119	0.123	0.21	0.178	0.186	0.149	0.151	0.133		00:13:39	0.305	0.333	0.298	0.301	0.333	0.336	0.382	0.343	0.368	0.279	0.31	0.292
00:13:51	0.438	0.317	0.304	0.313	0.311	0.298	0.279	0.304	0.348	0.351		00:13:51	0.118	0.139	0.142	0.136	0.12	0.123	0.211	0.178	0.187	0.15	0.153	0.13		00:13:51	0.309	0.335	0.3	0.305	0.335	0.334	0.385	0.344	0.37	0.281	0.313	0.294
00:14:03	0.44	0.318	0.305	0.313	0.316	0.299	0.28	0.305	0.35	0.353		00:14:03	0.117	0.136	0.143	0.137	0.119	0.124	0.212	0.179	0.189	0.151	0.155	0.131		00:14:03	0.311	0.337	0.301	0.309	0.337	0.334	0.387	0.347	0.371	0.282	0.315	0.296
00:14:15	0.442	0.319	0.307	0.316	0.314	0.301	0.28	0.307	0.349	0.351		00:14:15	0.119	0.136	0.144	0.137	0.12	0.124	0.213	0.18	0.19	0.154	0.155	0.138		00:14:15	0.313	0.34	0.302	0.306	0.34	0.338	0.388	0.348	0.373	0.283	0.318	0.298
00:14:27	0.445	0.321	0.306	0.316	0.318	0.302	0.281	0.308	0.351	0.355		00:14:27	0.12	0.136	0.145	0.137	0.12	0.124	0.213	0.181	0.19	0.154	0.157	0.131		00:14:27	0.316	0.341	0.303	0.313	0.341	0.336	0.39	0.35	0.375	0.284	0.319	0.298
00:14:39	0.447	0.322	0.308	0.317	0.318	0.304	0.282	0.309	0.351	0.356		00:14:39	0.121	0.137	0.145	0.138	0.12	0.126	0.214	0.182	0.191	0.155	0.156	0.133		00:14:39	0.319	0.344	0.305	0.31	0.344	0.338	0.393	0.351	0.376	0.285	0.321	0.301
00:14:51	0.449	0.324	0.309	0.317	0.32	0.304	0.282	0.31	0.353	0.358		00:14:51	0.121	0.138	0.146	0.138	0.121	0.125	0.216	0.182	0.193	0.157	0.158	0.141		00:14:51	0.321	0.345	0.306	0.312	0.345	0.338	0.394	0.352	0.378	0.287	0.324	0.303
00:15:03	0.451	0.325	0.31	0.318	0.323	0.306	0.283	0.311	0.353	0.358		00:15:03	0.121	0.136	0.147	0.139	0.121	0.126	0.216	0.183	0.193	0.157	0.16	0.135		00:15:03	0.323	0.347	0.307	0.315	0.347	0.34	0.396	0.353	0.379	0.288	0.325	0.304
00:15:15	0.452	0.327	0.31	0.322	0.322	0.307	0.283	0.312	0.354	0.359		00:15:15	0.12	0.138	0.147	0.14	0.122	0.126	0.217	0.184	0.194	0.159	0.16	0.137		00:15:15	0.325	0.349	0.308	0.316	0.349	0.347	0.397	0.353	0.381	0.289	0.327	0.305
00:15:27	0.455	0.327	0.312	0.32	0.324	0.309	0.285	0.313	0.354	0.358		00:15:27	0.119	0.137	0.147	0.14	0.122	0.127	0.217	0.184	0.194	0.161	0.161	0.143		00:15:27	0.328	0.35	0.311	0.317	0.35	0.343	0.4	0.356	0.382	0.29	0.329	0.307
00:15:39	0.456	0.329	0.313	0.321	0.325	0.309	0.285	0.314	0.355	0.361		00:15:39	0.122	0.14	0.148	0.141	0.122	0.128	0.218	0.185	0.195	0.16	0.162	0.138		00:15:39	0.328	0.352	0.31	0.317	0.352	0.345	0.401	0.355	0.383	0.29	0.331	0.308
00:15:51	0.458	0.331	0.314	0.322	0.325	0.311	0.286	0.315	0.354	0.358		00:15:51	0.121	0.142	0.149	0.141	0.123	0.128	0.219	0.185	0.195	0.162	0.162	0.142		00:15:51	0.33	0.353	0.312	0.318	0.353	0.345	0.403	0.358	0.385	0.292	0.333	0.31
00:16:03	0.46	0.331	0.315	0.324	0.329	0.312	0.286	0.316	0.354	0.359		00:16:03	0.12	0.139	0.149	0.141	0.122	0.128	0.22	0.186	0.197	0.162	0.163	0.137		00:16:03	0.332	0.354	0.312	0.321	0.354	0.349	0.404	0.358	0.385	0.292	0.334	0.311
00:16:15	0.461	0.333	0.316	0.325	0.327	0.314	0.286	0.317	0.356	0.363		00:16:15	0.12	0.138	0.149	0.141	0.123	0.128	0.22	0.187	0.196	0.163	0.163	0.137		00:16:15	0.334	0.356	0.313	0.32	0.356	0.35	0.405	0.359	0.386	0.293	0.336	0.312
00:16:27	0.463	0.334	0.314	0.325	0.328	0.314	0.287	0.318	0.356	0.363		00:16:27	0.12	0.14	0.149	0.142	0.123	0.129	0.22	0.187	0.197	0.165	0.163	0.147		00:16:27	0.336	0.357	0.315	0.325	0.357	0.348	0.406	0.361	0.388	0.294	0.338	0.314
00:16:39	0.463	0.334	0.316	0.325	0.329	0.315	0.288	0.318	0.356	0.362		00:16:39	0.123	0.141	0.15	0.143	0.123	0.13	0.221	0.188	0.198	0.165	0.165	0.139		00:16:39	0.337	0.359	0.315	0.322	0.359	0.349	0.408	0.361	0.389	0.295	0.34	0.315
00:16:51	0.465	0.335	0.317	0.326	0.33	0.316	0.288	0.32	0.358	0.366		00:16:51	0.121	0.141	0.15	0.143	0.125	0.129	0.222	0.188	0.198	0.167	0.165	0.145		00:16:51	0.338	0.359	0.316	0.325	0.359	0.35	0.409	0.362	0.39	0.296	0.341	0.316
00:17:03	0.467	0.336	0.316	0.328	0.332	0.317	0.289	0.32	0.359	0.366		00:17:03	0.12	0.139	0.15	0.143	0.124	0.13	0.222	0.189	0.199	0.167	0.166	0.14		00:17:03	0.341	0.36	0.318	0.328	0.36	0.354	0.411	0.363	0.391	0.297	0.343	0.318
00:17:15	0.468	0.337	0.318	0.329	0.332	0.318	0.289	0.321	0.357	0.363		00:17:15	0.122	0.139	0.152	0.143	0.124	0.13	0.223	0.189	0.199	0.168	0.166	0.142		00:17:15	0.343	0.362	0.319	0.326	0.362	0.352	0.412	0.364	0.391	0.298	0.344	0.32
00:17:27	0.469	0.338	0.319	0.328	0.333	0.319	0.289	0.322	0.359	0.365		00:17:27	0.12	0.141	0.151	0.143	0.125	0.13	0.223	0.19	0.2	0.17	0.166	0.148		00:17:27	0.342	0.362	0.319	0.329	0.362	0.35	0.413	0.365	0.392	0.298	0.345	0.32
00:17:39	0.471	0.339	0.318	0.329	0.334	0.319	0.289	0.322	0.36	0.366		00:17:39	0.122	0.141	0.151	0.144	0.125	0.131	0.223	0.19	0.2	0.169	0.168	0.141		00:17:39	0.343	0.364	0.32	0.326	0.364	0.348	0.414	0.365	0.393	0.299	0.346	0.322
00:17:51	0.472	0.339	0.319	0.329	0.334	0.32	0.29	0.323	0.36	0.367		00:17:51	0.121	0.142	0.153	0.144	0.125	0.131	0.224	0.19	0.201	0.17	0.167	0.146		00:17:51	0.344	0.364	0.321	0.326	0.364	0.349	0.414	0.366	0.394	0.3	0.347	0.322
00:18:03	0.473	0.34	0.321	0.329	0.337	0.321	0.29	0.323	0.36	0.369		00:18:03	0.121	0.142	0.152	0.144	0.125	0.131	0.225	0.19	0.202	0.171	0.168	0.143		00:18:03	0.346	0.365	0.322	0.334	0.365	0.347	0.416	0.368	0.395	0.3	0.348	0.322
00:18:15	0.474	0.341	0.321	0.331	0.335	0.322	0.29	0.324	0.36	0.368		00:18:15	0.123	0.141	0.153	0.145	0.125	0.132	0.225	0.191	0.201	0.171	0.168	0.142		00:18:15	0.347	0.366	0.323	0.328	0.366	0.35	0.416	0.368	0.396	0.301	0.35	0.324
00:18:27	0.475	0.342	0.32	0.329	0.335	0.322	0.291	0.324	0.361	0.369		00:18:27	0.121	0.144	0.153	0.145	0.126	0.132	0.225	0.191	0.202	0.173	0.168	0.149		00:18:27	0.348	0.367	0.324	0.324	0.367	0.346	0.418	0.369	0.396	0.302	0.351	0.325
00:18:39	0.476	0.342	0.321	0.332	0.338	0.322	0.291	0.324	0.361	0.369		00:18:39	0.122	0.141	0.153	0.145	0.126	0.132	0.226	0.192	0.202	0.172	0.171	0.145		00:18:39	0.348	0.367	0.324	0.325	0.367	0.35	0.418	0.37	0.397	0.303	0.352	0.325
00:18:51	0.477	0.343	0.322	0.333	0.337	0.323	0.291	0.325	0.362	0.369		00:18:51	0.122	0.139	0.154	0.145	0.127	0.132	0.226	0.192	0.203	0.173	0.17	0.145		00:18:51	0.35	0.368	0.326	0.326	0.368	0.353	0.419	0.37	0.397	0.304	0.355	0.327
00:19:03	0.478	0.343	0.322	0.331	0.337	0.324	0.292	0.326	0.362	0.371		00:19:03	0.123	0.14	0.154	0.146	0.126	0.133	0.226	0.192	0.203	0.174	0.17	0.147		00:19:03	0.351	0.369	0.327	0.33	0.369	0.346	0.42	0.371	0.398	0.304	0.355	0.328
00:19:15	0.48	0.344	0.322	0.334	0.338	0.324	0.292	0.326	0.362	0.371		00:19:15	0.122	0.141	0.154	0.146	0.126	0.133	0.227	0.193	0.204	0.174	0.171	0.144		00:19:15	0.353	0.37	0.328	0.329	0.37	0.352	0.421	0.372	0.399	0.305	0.355	0.329
00:19:27	0.48	0.345	0.322	0.333	0.338	0.325	0.292	0.327	0.361	0.368		00:19:27	0.121	0.142	0.154	0.146	0.127	0.133	0.227	0.193	0.204	0.176	0.171	0.151		00:19:27	0.352	0.37	0.329	0.326	0.37	0.35	0.421	0.373	0.399	0.305	0.356	0.329
00:19:39	0.481	0.344	0.322	0.332	0.34	0.325	0.292	0.327	0.363	0.372		00:19:39	0.123	0.142	0.155	0.146	0.127	0.134	0.228	0.193	0.204	0.175	0.172	0.143		00:19:39	0.354	0.371	0.329	0.33	0.371	0.348	0.422	0.372	0.4	0.306	0.357	0.33
00:19:51	0.482	0.346	0.322	0.335	0.339	0.325	0.292	0.327	0.363	0.371		00:19:51	0.121	0.142	0.154	0.147	0.127	0.133	0.228	0.194	0.204	0.176	0.172	0.146		00:19:51	0.355	0.372	0.33	0.326	0.372	0.35	0.422	0.373	0.4	0.307	0.358	0.33
00:20:03	0.483	0.346	0.323	0.332	0.341	0.327	0.293	0.328	0.362	0.37		00:20:03	0.122	0.142	0.155	0.146	0.127	0.134	0.228	0.194	0.205	0.176	0.172	0.146		00:20:03	0.355	0.372	0.331	0.333	0.372	0.345	0.423	0.374	0.401	0.308	0.359	0.332
00:20:15	0.483	0.346	0.323	0.335	0.34	0.327	0.293	0.328	0.363	0.372		00:20:15	0.123	0.141	0.155	0.147	0.126	0.133	0.228	0.194	0.204	0.176	0.172	0.144		00:20:15	0.355	0.375	0.331	0.328	0.375	0.351	0.424	0.374	0.402	0.309	0.361	0.332
00:20:27	0.485	0.347	0.323	0.333	0.34	0.328	0.293	0.329	0.364	0.372		00:20:27	0.122	0.144	0.155	0.147	0.128	0.134	0.228	0.194	0.205	0.179	0.173	0.153		00:20:27	0.357	0.374	0.333	0.326	0.374	0.345	0.424	0.375	0.402	0.309	0.361	0.332
00:20:39	0.485	0.347	0.324	0.334	0.343	0.328	0.293	0.329	0.364	0.373		00:20:39	0.123	0.141	0.156	0.147	0.127	0.134	0.228	0.195	0.205	0.178	0.173	0.146		00:20:39	0.357	0.374	0.332	0.328	0.374	0.345	0.425	0.375	0.402	0.31	0.363	0.333
00:20:51	0.486	0.348	0.324	0.336	0.34	0.328	0.293	0.329	0.363	0.372		00:20:51	0.121	0.142	0.156	0.147	0.128	0.134	0.229	0.195	0.206	0.179	0.173	0.147		00:20:51	0.359	0.375	0.334	0.33	0.375	0.347	0.426	0.376	0.403	0.311	0.363	0.334
00:21:03	0.486	0.348	0.324	0.333	0.344	0.329	0.293	0.329	0.364	0.372		00:21:03	0.121	0.14	0.156	0.147	0.127	0.134	0.229	0.195	0.206	0.179	0.173	0.148		00:21:03	0.36	0.375	0.335	0.333	0.375	0.344	0.426	0.377	0.403	0.311	0.363	0.334
00:21:15	0.488	0.348	0.325	0.335	0.342	0.329	0.294	0.329	0.363	0.371		00:21:15	0.124	0.14	0.157	0.148	0.127	0.135	0.229	0.195	0.207	0.179	0.175	0.146		00:21:15	0.359	0.376	0.335	0.327	0.376	0.346	0.427	0.376	0.404	0.312	0.364	0.335
00:21:27	0.488	0.349	0.325	0.334	0.342	0.33	0.294	0.33	0.364	0.372		00:21:27	0.121	0.144	0.156	0.147	0.128	0.135	0.23	0.196	0.206	0.181	0.174	0.152		00:21:27	0.36	0.376	0.336	0.325	0.376	0.343	0.427	0.378	0.404	0.312	0.366	0.335
00:21:39	0.488	0.349	0.325	0.335	0.344	0.33	0.294	0.33	0.364	0.374		00:21:39	0.122	0.141	0.156	0.148	0.127	0.135	0.23	0.196	0.207	0.18	0.175	0.144		00:21:39	0.361	0.377	0.337	0.33	0.377	0.345	0.428	0.377	0.405	0.313	0.367	0.336
00:21:51	0.489	0.349	0.325	0.336	0.344	0.33	0.294	0.331	0.363	0.371		00:21:51	0.123	0.141	0.157	0.148	0.128	0.135	0.23	0.196	0.207	0.18	0.175	0.146		00:21:51	0.361	0.377	0.337	0.327	0.377	0.346	0.428	0.378	0.405	0.313	0.367	0.336
00:22:03	0.49	0.349	0.324	0.335	0.344	0.33	0.294	0.331	0.364	0.371		00:22:03	0.121	0.142	0.157	0.148	0.127	0.135	0.23	0.196	0.207	0.182	0.175	0.151		00:22:03	0.362	0.376	0.338	0.33	0.376	0.343	0.428	0.38	0.406	0.314	0.368	0.336
00:22:15	0.49	0.349	0.326	0.335	0.343	0.331	0.294	0.331	0.365	0.374		00:22:15	0.123	0.142	0.157	0.148	0.128	0.135	0.23	0.197	0.207	0.181	0.175	0.146		00:22:15	0.362	0.377	0.338	0.326	0.377	0.343	0.429	0.379	0.405	0.315	0.369	0.337
00:22:27	0.491	0.35	0.325	0.336	0.344	0.331	0.294	0.331	0.365	0.374		00:22:27	0.122	0.143	0.157	0.148	0.128	0.135	0.23	0.196	0.207	0.181	0.175	0.146		00:22:27	0.363	0.378	0.34	0.326	0.378	0.344	0.429	0.381	0.406	0.315	0.368	0.337
00:22:39	0.491	0.35	0.326	0.336	0.346	0.331	0.294	0.331	0.365	0.374		00:22:39	0.122	0.142	0.157	0.149	0.128	0.136	0.231	0.197	0.207	0.183	0.175	0.153		00:22:39	0.363	0.377	0.34	0.328	0.377	0.343	0.43	0.379	0.406	0.316	0.37	0.338
00:22:51	0.492	0.351	0.325	0.338	0.344	0.332	0.294	0.332	0.365	0.374		00:22:51	0.121	0.142	0.157	0.148	0.128	0.136	0.231	0.196	0.208	0.182	0.177	0.147		00:22:51	0.363	0.378	0.34	0.326	0.378	0.347	0.43	0.381	0.406	0.316	0.371	0.338
00:23:03	0.492	0.351	0.327	0.336	0.346	0.332	0.294	0.332	0.365	0.373		00:23:03	0.121	0.141	0.157	0.148	0.128	0.136	0.231	0.197	0.208	0.182	0.175	0.146		00:23:03	0.364	0.378	0.341	0.329	0.378	0.342	0.43	0.381	0.407	0.317	0.372	0.338
00:23:15	0.493	0.351	0.326	0.337	0.344	0.332	0.294	0.332	0.366	0.374		00:23:15	0.124	0.141	0.158	0.148	0.128	0.136	0.232	0.197	0.209	0.183	0.176	0.147		00:23:15	0.364	0.378	0.341	0.325	0.378	0.345	0.431	0.381	0.407	0.317	0.372	0.34
00:23:27	0.493	0.352	0.326	0.336	0.345	0.332	0.295	0.332	0.364	0.372		00:23:27	0.121	0.145	0.157	0.149	0.128	0.136	0.231	0.197	0.208	0.183	0.176	0.145		00:23:27	0.365	0.377	0.343	0.329	0.377	0.342	0.432	0.382	0.407	0.318	0.373	0.339
00:23:39	0.494	0.351	0.326	0.335	0.347	0.332	0.294	0.332	0.365	0.373		00:23:39	0.123	0.141	0.158	0.149	0.128	0.136	0.232	0.197	0.209	0.184	0.176	0.151		00:23:39	0.366	0.378	0.343	0.327	0.378	0.342	0.431	0.382	0.408	0.319	0.373	0.34
00:23:51	0.494	0.351	0.326	0.338	0.345	0.333	0.295	0.332	0.366	0.374		00:23:51	0.122	0.142	0.158	0.149	0.129	0.136	0.232	0.197	0.208	0.183	0.178	0.147		00:23:51	0.366	0.378	0.344	0.326	0.378	0.345	0.432	0.382	0.408	0.319	0.374	0.34
00:24:03	0.495	0.351	0.326	0.338	0.346	0.333	0.295	0.332	0.365	0.372		00:24:03	0.121	0.144	0.158	0.149	0.128	0.136	0.232	0.198	0.209	0.183	0.176	0.146		00:24:03	0.366	0.378	0.345	0.33	0.378	0.347	0.432	0.382	0.408	0.319	0.374	0.34
00:24:15	0.495	0.352	0.326	0.337	0.345	0.333	0.295	0.333	0.365	0.374		00:24:15	0.123	0.142	0.159	0.149	0.128	0.136	0.232	0.197	0.208	0.185	0.177	0.153		00:24:15	0.368	0.378	0.345	0.325	0.378	0.344	0.433	0.383	0.408	0.32	0.375	0.341
00:24:27	0.496	0.353	0.327	0.336	0.346	0.333	0.295	0.333	0.366	0.374		00:24:27	0.121	0.143	0.158	0.149	0.128	0.136	0.232	0.197	0.209	0.184	0.178	0.147		00:24:27	0.367	0.377	0.344	0.325	0.377	0.341	0.434	0.384	0.409	0.32	0.375	0.341
00:24:39	0.496	0.352	0.327	0.337	0.347	0.333	0.295	0.333	0.366	0.374		00:24:39	0.122	0.142	0.158	0.149	0.128	0.137	0.232	0.198	0.209	0.185	0.177	0.151		00:24:39	0.367	0.377	0.345	0.325	0.377	0.344	0.433	0.383	0.409	0.32	0.376	0.341
00:24:51	0.497	0.353	0.326	0.338	0.346	0.333	0.295	0.333	0.366	0.373		00:24:51	0.121	0.142	0.158	0.149	0.129	0.136	0.232	0.198	0.209	0.184	0.178	0.147		00:24:51	0.368	0.378	0.345	0.325	0.378	0.346	0.433	0.384	0.409	0.321	0.376	0.342
00:25:03	0.497	0.352	0.327	0.336	0.346	0.334	0.295	0.333	0.366	0.374		00:25:03	0.121	0.14	0.159	0.149	0.128	0.136	0.232	0.198	0.209	0.185	0.178	0.147		00:25:03	0.368	0.377	0.347	0.33	0.377	0.342	0.433	0.383	0.409	0.321	0.378	0.342
00:25:15	0.497	0.353	0.327	0.337	0.345	0.334	0.295	0.334	0.367	0.374		00:25:15	0.122	0.141	0.159	0.149	0.128	0.137	0.233	0.198	0.209	0.186	0.177	0.152		00:25:15	0.368	0.378	0.347	0.323	0.378	0.343	0.434	0.384	0.409	0.321	0.378	0.343
00:25:27	0.498	0.353	0.326	0.337	0.346	0.334	0.295	0.333	0.366	0.374		00:25:27	0.121	0.143	0.159	0.149	0.128	0.136	0.233	0.198	0.209	0.185	0.177	0.146		00:25:27	0.369	0.377	0.348	0.326	0.377	0.343	0.434	0.385	0.41	0.321	0.378	0.342
00:25:39	0.498	0.353	0.327	0.337	0.347	0.334	0.295	0.333	0.366	0.374		00:25:39	0.122	0.141	0.159	0.15	0.128	0.137	0.232	0.198	0.21	0.185	0.177	0.147		00:25:39	0.368	0.377	0.347	0.329	0.377	0.343	0.434	0.384	0.409	0.322	0.379	0.342
00:25:51	0.499	0.354	0.327	0.339	0.346	0.334	0.295	0.333	0.366	0.373		00:25:51	0.121	0.14	0.159	0.149	0.129	0.136	0.233	0.198	0.209	0.187	0.177	0.151		00:25:51	0.369	0.377	0.349	0.325	0.377	0.345	0.435	0.385	0.41	0.322	0.378	0.343
00:26:03	0.499	0.353	0.326	0.337	0.346	0.335	0.295	0.334	0.366	0.372		00:26:03	0.121	0.146	0.159	0.15	0.128	0.137	0.233	0.198	0.21	0.186	0.178	0.147		00:26:03	0.369	0.377	0.349	0.325	0.377	0.342	0.435	0.385	0.41	0.323	0.38	0.344
00:26:15	0.5	0.353	0.328	0.337	0.346	0.334	0.295	0.334	0.367	0.375		00:26:15	0.122	0.14	0.159	0.149	0.129	0.137	0.233	0.198	0.209	0.186	0.177	0.148		00:26:15	0.368	0.376	0.349	0.323	0.376	0.342	0.435	0.385	0.41	0.323	0.38	0.344
00:26:27	0.499	0.354	0.327	0.339	0.346	0.335	0.295	0.334	0.365	0.372		00:26:27	0.12	0.143	0.159	0.15	0.128	0.137	0.233	0.199	0.209	0.186	0.178	0.147		00:26:27	0.367	0.377	0.348	0.323	0.377	0.345	0.436	0.387	0.41	0.323	0.38	0.344
00:26:39	0.5	0.354	0.327	0.338	0.348	0.335	0.295	0.334	0.367	0.374		00:26:39	0.12	0.141	0.159	0.15	0.128	0.137	0.233	0.199	0.209	0.186	0.178	0.148		00:26:39	0.368	0.376	0.349	0.326	0.376	0.344	0.436	0.386	0.41	0.323	0.38	0.344
00:26:51	0.5	0.354	0.326	0.339	0.346	0.335	0.296	0.334	0.367	0.374		00:26:51	0.122	0.139	0.159	0.15	0.129	0.137	0.233	0.199	0.209	0.187	0.178	0.152		00:26:51	0.368	0.377	0.349	0.323	0.377	0.342	0.437	0.387	0.411	0.323	0.381	0.344
00:27:03	0.5	0.354	0.327	0.337	0.347	0.335	0.296	0.334	0.367	0.373		00:27:03	0.12	0.144	0.159	0.15	0.129	0.137	0.233	0.198	0.21	0.187	0.179	0.147		00:27:03	0.367	0.377	0.351	0.325	0.377	0.341	0.437	0.386	0.411	0.323	0.382	0.345
00:27:15	0.5	0.354	0.327	0.338	0.348	0.335	0.296	0.334	0.367	0.375		00:27:15	0.124	0.14	0.159	0.15	0.129	0.137	0.233	0.199	0.21	0.188	0.177	0.151		00:27:15	0.367	0.376	0.35	0.318	0.376	0.343	0.437	0.386	0.411	0.324	0.382	0.344
00:27:27	0.5	0.355	0.327	0.339	0.347	0.335	0.296	0.334	0.366	0.373		00:27:27	0.121	0.141	0.159	0.15	0.128	0.137	0.233	0.199	0.21	0.187	0.179	0.147		00:27:27	0.367	0.375	0.351	0.32	0.375	0.342	0.437	0.388	0.412	0.324	0.383	0.345
00:27:39	0.501	0.354	0.327	0.337	0.348	0.335	0.295	0.334	0.366	0.372		00:27:39	0.121	0.141	0.16	0.15	0.129	0.138	0.233	0.199	0.21	0.187	0.178	0.146		00:27:39	0.368	0.376	0.351	0.326	0.376	0.34	0.436	0.387	0.411	0.325	0.383	0.346
00:27:51	0.501	0.355	0.327	0.339	0.346	0.335	0.295	0.334	0.366	0.373		00:27:51	0.122	0.14	0.159	0.15	0.13	0.137	0.233	0.199	0.21	0.188	0.178	0.151		00:27:51	0.367	0.376	0.351	0.321	0.376	0.343	0.437	0.387	0.412	0.325	0.383	0.346
00:28:03	0.501	0.354	0.328	0.337	0.347	0.336	0.295	0.334	0.367	0.373		00:28:03	0.121	0.143	0.159	0.15	0.129	0.137	0.233	0.2	0.21	0.187	0.179	0.145		00:28:03	0.367	0.375	0.352	0.322	0.375	0.339	0.437	0.387	0.411	0.325	0.384	0.346
00:28:15	0.501	0.354	0.327	0.338	0.348	0.335	0.295	0.334	0.367	0.374		00:28:15	0.121	0.139	0.16	0.15	0.129	0.137	0.234	0.199	0.21	0.188	0.178	0.149		00:28:15	0.367	0.375	0.351	0.319	0.375	0.34	0.438	0.387	0.412	0.325	0.384	0.346
00:28:27	0.501	0.355	0.327	0.34	0.346	0.336	0.296	0.335	0.366	0.373		00:28:27	0.121	0.139	0.16	0.15	0.129	0.137	0.233	0.199	0.21	0.188	0.179	0.147		00:28:27	0.367	0.376	0.352	0.32	0.376	0.343	0.438	0.389	0.413	0.325	0.385	0.345
00:28:39	0.502	0.354	0.328	0.337	0.347	0.336	0.295	0.334	0.366	0.372		00:28:39	0.12	0.139	0.159	0.151	0.129	0.138	0.234	0.199	0.21	0.187	0.178	0.146		00:28:39	0.366	0.375	0.352	0.325	0.375	0.337	0.438	0.388	0.412	0.325	0.384	0.345
00:28:51	0.502	0.355	0.329	0.338	0.346	0.336	0.295	0.334	0.367	0.373		00:28:51	0.122	0.139	0.16	0.15	0.129	0.137	0.234	0.199	0.21	0.188	0.179	0.15		00:28:51	0.367	0.375	0.352	0.32	0.375	0.339	0.438	0.388	0.412	0.325	0.385	0.346
00:29:03	0.502	0.355	0.327	0.338	0.347	0.336	0.296	0.335	0.367	0.372		00:29:03	0.122	0.142	0.161	0.15	0.129	0.138	0.234	0.2	0.211	0.188	0.179	0.146		00:29:03	0.365	0.375	0.353	0.32	0.375	0.337	0.439	0.389	0.413	0.326	0.386	0.346
00:29:15	0.502	0.355	0.327	0.337	0.348	0.336	0.295	0.335	0.366	0.372		00:29:15	0.122	0.14	0.16	0.15	0.129	0.137	0.234	0.199	0.21	0.189	0.179	0.15		00:29:15	0.366	0.376	0.353	0.317	0.376	0.335	0.438	0.389	0.413	0.327	0.386	0.347
00:29:27	0.502	0.355	0.326	0.339	0.346	0.336	0.296	0.334	0.367	0.372		00:29:27	0.121	0.139	0.16	0.15	0.129	0.137	0.234	0.199	0.21	0.188	0.179	0.145		00:29:27	0.365	0.375	0.353	0.318	0.375	0.337	0.438	0.389	0.413	0.327	0.387	0.347
00:29:39	0.502	0.354	0.326	0.338	0.347	0.336	0.296	0.335	0.367	0.372		00:29:39	0.122	0.139	0.16	0.15	0.129	0.138	0.234	0.199	0.21	0.188	0.178	0.146		00:29:39	0.365	0.375	0.353	0.324	0.375	0.334	0.439	0.389	0.413	0.326	0.386	0.347
00:29:51	0.502	0.355	0.326	0.338	0.346	0.336	0.296	0.335	0.367	0.373		00:29:51	0.123	0.14	0.16	0.15	0.13	0.137	0.234	0.199	0.21	0.188	0.178	0.146		00:29:51	0.364	0.374	0.353	0.319	0.374	0.333	0.439	0.389	0.413	0.326	0.387	0.347
00:30:03	0.503	0.355	0.327	0.337	0.346	0.336	0.295	0.335	0.366	0.371		00:30:03	0.12	0.142	0.16	0.15	0.129	0.138	0.233	0.199	0.21	0.188	0.179	0.144		00:30:03	0.364	0.375	0.354	0.319	0.375	0.333	0.439	0.389	0.413	0.327	0.388	0.347
00:30:15	0.503	0.355	0.327	0.338	0.347	0.336	0.296	0.335	0.366	0.373		00:30:15	0.121	0.138	0.16	0.15	0.129	0.138	0.234	0.2	0.21	0.189	0.179	0.151		00:30:15	0.365	0.375	0.354	0.319	0.375	0.334	0.439	0.389	0.414	0.327	0.388	0.348
00:30:27	0.503	0.356	0.326	0.339	0.346	0.336	0.296	0.335	0.366	0.371		00:30:27	0.121	0.139	0.161	0.15	0.129	0.138	0.234	0.2	0.211	0.188	0.179	0.145		00:30:27	0.364	0.375	0.354	0.319	0.375	0.333	0.44	0.39	0.414	0.328	0.388	0.347
00:30:39	0.503	0.355	0.327	0.338	0.347	0.336	0.295	0.334	0.366	0.372		00:30:39	0.121	0.141	0.161	0.15	0.128	0.138	0.234	0.199	0.211	0.189	0.179	0.148		00:30:39	0.363	0.374	0.353	0.322	0.374	0.332	0.44	0.389	0.413	0.328	0.388	0.347
00:30:51	0.503	0.355	0.327	0.338	0.345	0.336	0.295	0.335	0.367	0.372		00:30:51	0.121	0.141	0.16	0.15	0.129	0.138	0.234	0.199	0.21	0.188	0.179	0.144		00:30:51	0.363	0.375	0.354	0.318	0.375	0.332	0.439	0.391	0.413	0.328	0.388	0.348
00:31:03	0.504	0.355	0.327	0.338	0.346	0.336	0.295	0.335	0.367	0.371		00:31:03	0.12	0.141	0.16	0.151	0.129	0.138	0.234	0.199	0.21	0.189	0.18	0.146		00:31:03	0.362	0.374	0.354	0.318	0.374	0.333	0.44	0.39	0.414	0.328	0.39	0.347
00:31:15	0.504	0.355	0.327	0.338	0.348	0.336	0.295	0.335	0.366	0.371		00:31:15	0.121	0.139	0.16	0.15	0.129	0.138	0.234	0.199	0.21	0.19	0.179	0.15		00:31:15	0.363	0.374	0.354	0.319	0.374	0.33	0.44	0.39	0.414	0.328	0.39	0.348
00:31:27	0.504	0.355	0.327	0.339	0.346	0.336	0.296	0.335	0.366	0.371		00:31:27	0.121	0.138	0.16	0.15	0.128	0.138	0.234	0.2	0.211	0.189	0.18	0.145		00:31:27	0.363	0.375	0.354	0.318	0.375	0.33	0.441	0.391	0.414	0.328	0.389	0.348
00:31:39	0.505	0.355	0.326	0.338	0.346	0.336	0.295	0.334	0.366	0.371		00:31:39	0.121	0.14	0.16	0.151	0.128	0.138	0.235	0.199	0.211	0.189	0.179	0.148		00:31:39	0.363	0.374	0.355	0.321	0.374	0.33	0.44	0.39	0.414	0.329	0.389	0.349
00:31:51	0.504	0.355	0.327	0.337	0.346	0.337	0.296	0.335	0.367	0.372		00:31:51	0.122	0.139	0.16	0.15	0.13	0.138	0.234	0.2	0.211	0.188	0.179	0.146		00:31:51	0.362	0.375	0.355	0.316	0.375	0.327	0.441	0.391	0.414	0.328	0.39	0.349
00:32:03	0.504	0.355	0.326	0.337	0.345	0.337	0.295	0.335	0.366	0.371		00:32:03	0.12	0.141	0.16	0.15	0.129	0.138	0.234	0.199	0.211	0.189	0.179	0.144		00:32:03	0.362	0.374	0.356	0.316	0.374	0.326	0.44	0.391	0.414	0.329	0.39	0.349
00:32:15	0.504	0.355	0.327	0.338	0.347	0.336	0.295	0.335	0.367	0.372		00:32:15	0.12	0.139	0.16	0.151	0.129	0.138	0.234	0.2	0.211	0.19	0.179	0.149		00:32:15	0.362	0.374	0.355	0.318	0.374	0.325	0.441	0.391	0.414	0.328	0.39	0.348
00:32:27	0.504	0.355	0.326	0.339	0.346	0.337	0.295	0.335	0.367	0.372		00:32:27	0.12	0.139	0.16	0.15	0.128	0.138	0.234	0.199	0.21	0.189	0.18	0.144		00:32:27	0.362	0.373	0.355	0.316	0.373	0.326	0.441	0.392	0.414	0.329	0.391	0.349
00:32:39	0.504	0.355	0.328	0.338	0.346	0.336	0.295	0.334	0.365	0.37		00:32:39	0.12	0.139	0.16	0.151	0.129	0.138	0.234	0.2	0.211	0.189	0.179	0.145		00:32:39	0.362	0.373	0.355	0.319	0.373	0.324	0.442	0.391	0.415	0.329	0.391	0.349
00:32:51	0.504	0.355	0.327	0.338	0.345	0.337	0.295	0.335	0.367	0.371		00:32:51	0.121	0.139	0.16	0.15	0.13	0.138	0.234	0.199	0.21	0.189	0.179	0.145		00:32:51	0.362	0.374	0.355	0.314	0.374	0.324	0.441	0.391	0.415	0.329	0.392	0.349
00:33:03	0.504	0.354	0.327	0.337	0.345	0.337	0.296	0.335	0.366	0.37		00:33:03	0.12	0.142	0.16	0.151	0.129	0.138	0.234	0.199	0.21	0.189	0.18	0.146		00:33:03	0.362	0.374	0.355	0.318	0.374	0.322	0.442	0.392	0.415	0.329	0.391	0.349
00:33:15	0.505	0.354	0.327	0.336	0.347	0.336	0.295	0.335	0.367	0.371		00:33:15	0.12	0.139	0.16	0.15	0.129	0.138	0.235	0.2	0.211	0.19	0.179	0.147		00:33:15	0.362	0.374	0.355	0.316	0.374	0.32	0.442	0.391	0.415	0.329	0.392	0.349
00:33:27	0.505	0.355	0.327	0.34	0.345	0.337	0.295	0.335	0.366	0.37		00:33:27	0.119	0.138	0.16	0.15	0.129	0.138	0.234	0.2	0.21	0.189	0.18	0.143		00:33:27	0.361	0.373	0.354	0.316	0.373	0.322	0.442	0.392	0.415	0.329	0.391	0.349
00:33:39	0.505	0.354	0.327	0.337	0.346	0.336	0.295	0.334	0.366	0.371		00:33:39	0.119	0.137	0.16	0.151	0.128	0.138	0.234	0.199	0.21	0.189	0.18	0.144		00:33:39	0.362	0.374	0.355	0.32	0.374	0.319	0.441	0.392	0.415	0.329	0.391	0.35
00:33:51	0.504	0.355	0.327	0.338	0.344	0.336	0.295	0.335	0.367	0.371		00:33:51	0.12	0.138	0.16	0.15	0.129	0.138	0.234	0.2	0.211	0.19	0.179	0.146		00:33:51	0.362	0.374	0.355	0.316	0.374	0.321	0.442	0.392	0.416	0.329	0.392	0.35
00:34:03	0.504	0.355	0.326	0.337	0.345	0.337	0.295	0.335	0.366	0.37		00:34:03	0.12	0.139	0.161	0.151	0.129	0.138	0.235	0.201	0.211	0.189	0.179	0.143		00:34:03	0.361	0.373	0.355	0.316	0.373	0.317	0.443	0.392	0.416	0.329	0.392	0.349
00:34:15	0.505	0.354	0.327	0.337	0.346	0.336	0.295	0.335	0.366	0.369		00:34:15	0.119	0.139	0.16	0.15	0.129	0.138	0.235	0.2	0.211	0.189	0.179	0.144		00:34:15	0.362	0.375	0.355	0.316	0.375	0.317	0.442	0.392	0.415	0.33	0.393	0.35
00:34:27	0.505	0.355	0.327	0.338	0.345	0.337	0.295	0.335	0.366	0.37		00:34:27	0.119	0.139	0.16	0.15	0.128	0.138	0.235	0.2	0.211	0.19	0.179	0.148		00:34:27	0.362	0.374	0.355	0.316	0.374	0.315	0.442	0.393	0.415	0.33	0.392	0.349
00:34:39	0.505	0.355	0.326	0.337	0.346	0.336	0.295	0.334	0.365	0.368		00:34:39	0.119	0.137	0.16	0.151	0.128	0.138	0.235	0.2	0.21	0.189	0.179	0.143		00:34:39	0.362	0.374	0.355	0.317	0.374	0.315	0.442	0.391	0.415	0.33	0.393	0.35
00:34:51	0.505	0.354	0.326	0.338	0.344	0.336	0.295	0.334	0.367	0.371		00:34:51	0.12	0.137	0.16	0.15	0.129	0.137	0.235	0.2	0.21	0.19	0.179	0.147		00:34:51	0.361	0.374	0.355	0.315	0.374	0.315	0.442	0.392	0.415	0.329	0.392	0.349
00:35:03	0.505	0.355	0.326	0.337	0.344	0.336	0.295	0.334	0.365	0.369		00:35:03	0.12	0.14	0.16	0.151	0.128	0.138	0.234	0.2	0.21	0.189	0.18	0.142		00:35:03	0.362	0.374	0.356	0.315	0.374	0.314	0.443	0.391	0.415	0.33	0.393	0.35
00:35:15	0.505	0.355	0.327	0.336	0.346	0.336	0.295	0.334	0.366	0.369		00:35:15	0.12	0.138	0.16	0.15	0.129	0.138	0.234	0.2	0.21	0.189	0.179	0.143		00:35:15	0.362	0.374	0.355	0.316	0.374	0.311	0.444	0.392	0.416	0.33	0.393	0.35
00:35:27	0.504	0.355	0.326	0.339	0.344	0.336	0.295	0.334	0.365	0.369		00:35:27	0.119	0.137	0.16	0.15	0.129	0.137	0.235	0.2	0.21	0.189	0.18	0.143		00:35:27	0.362	0.374	0.355	0.315	0.374	0.312	0.444	0.394	0.416	0.33	0.394	0.35
00:35:39	0.505	0.354	0.326	0.336	0.345	0.336	0.295	0.334	0.366	0.369		00:35:39	0.119	0.137	0.16	0.151	0.129	0.138	0.234	0.2	0.21	0.189	0.18	0.143		00:35:39	0.361	0.374	0.355	0.318	0.374	0.308	0.443	0.392	0.416	0.33	0.394	0.35
00:35:51	0.505	0.354	0.327	0.337	0.343	0.336	0.295	0.334	0.366	0.369		00:35:51	0.121	0.137	0.16	0.15	0.129	0.138	0.235	0.2	0.21	0.189	0.179	0.144		00:35:51	0.362	0.375	0.355	0.315	0.375	0.308	0.443	0.393	0.416	0.33	0.394	0.35
00:36:03	0.505	0.354	0.326	0.336	0.343	0.336	0.295	0.334	0.366	0.369		00:36:03	0.119	0.139	0.159	0.151	0.128	0.138	0.235	0.2	0.211	0.189	0.179	0.141		00:36:03	0.361	0.374	0.355	0.314	0.374	0.306	0.443	0.392	0.416	0.331	0.394	0.35
00:36:15	0.505	0.354	0.326	0.336	0.345	0.336	0.295	0.334	0.366	0.369		00:36:15	0.12	0.137	0.16	0.15	0.129	0.138	0.235	0.2	0.21	0.189	0.179	0.141		00:36:15	0.362	0.375	0.354	0.314	0.375	0.305	0.443	0.392	0.415	0.331	0.394	0.351
00:36:27	0.505	0.355	0.326	0.338	0.343	0.336	0.295	0.334	0.366	0.368		00:36:27	0.12	0.137	0.16	0.15	0.128	0.138	0.234	0.2	0.21	0.19	0.179	0.144		00:36:27	0.362	0.374	0.355	0.313	0.374	0.305	0.443	0.393	0.416	0.331	0.394	0.351
00:36:39	0.505	0.354	0.326	0.336	0.344	0.336	0.294	0.335	0.365	0.368		00:36:39	0.119	0.137	0.159	0.151	0.128	0.138	0.234	0.2	0.21	0.189	0.18	0.141		00:36:39	0.362	0.374	0.356	0.317	0.374	0.304	0.444	0.392	0.415	0.331	0.394	0.351
00:36:51	0.504	0.354	0.325	0.336	0.343	0.336	0.295	0.334	0.365	0.369		00:36:51	0.12	0.138	0.16	0.15	0.129	0.138	0.235	0.2	0.21	0.19	0.179	0.144		00:36:51	0.361	0.375	0.354	0.316	0.375	0.303	0.444	0.394	0.416	0.332	0.396	0.351
00:37:03	0.505	0.355	0.326	0.336	0.343	0.336	0.295	0.334	0.366	0.369		00:37:03	0.119	0.139	0.159	0.151	0.128	0.138	0.234	0.199	0.21	0.189	0.18	0.141		00:37:03	0.361	0.374	0.355	0.315	0.374	0.304	0.444	0.393	0.416	0.33	0.394	0.35
00:37:15	0.504	0.354	0.326	0.336	0.344	0.336	0.295	0.334	0.365	0.368		00:37:15	0.119	0.138	0.16	0.15	0.129	0.138	0.235	0.2	0.211	0.189	0.179	0.141		00:37:15	0.361	0.374	0.354	0.315	0.374	0.302	0.444	0.393	0.416	0.33	0.394	0.351
00:37:27	0.505	0.355	0.326	0.337	0.343	0.336	0.294	0.334	0.365	0.368		00:37:27	0.119	0.136	0.159	0.15	0.128	0.138	0.235	0.2	0.211	0.19	0.179	0.144		00:37:27	0.361	0.374	0.354	0.311	0.374	0.301	0.443	0.393	0.416	0.331	0.395	0.35
00:37:39	0.505	0.354	0.326	0.335	0.344	0.336	0.294	0.334	0.364	0.367		00:37:39	0.119	0.136	0.159	0.151	0.128	0.138	0.235	0.2	0.21	0.189	0.18	0.141		00:37:39	0.361	0.374	0.354	0.317	0.374	0.299	0.444	0.393	0.416	0.331	0.395	0.35
00:37:51	0.504	0.354	0.326	0.336	0.343	0.336	0.294	0.334	0.365	0.368		00:37:51	0.12	0.137	0.16	0.15	0.129	0.137	0.235	0.199	0.21	0.189	0.179	0.142		00:37:51	0.362	0.374	0.354	0.314	0.374	0.299	0.444	0.393	0.416	0.331	0.396	0.35
00:38:03	0.505	0.354	0.325	0.335	0.342	0.336	0.295	0.334	0.365	0.368		00:38:03	0.119	0.138	0.16	0.15	0.128	0.138	0.234	0.2	0.21	0.189	0.18	0.14		00:38:03	0.362	0.374	0.354	0.312	0.374	0.298	0.444	0.392	0.416	0.331	0.394	0.35
00:38:15	0.504	0.354	0.326	0.335	0.344	0.336	0.294	0.334	0.365	0.368		00:38:15	0.119	0.137	0.159	0.15	0.129	0.138	0.235	0.2	0.21	0.189	0.18	0.14		00:38:15	0.363	0.374	0.354	0.314	0.374	0.298	0.445	0.393	0.416	0.331	0.395	0.35
00:38:27	0.505	0.354	0.325	0.336	0.342	0.336	0.294	0.334	0.364	0.367		00:38:27	0.119	0.136	0.16	0.15	0.128	0.138	0.234	0.2	0.209	0.19	0.179	0.143		00:38:27	0.362	0.374	0.353	0.313	0.374	0.297	0.444	0.394	0.416	0.331	0.394	0.35
00:38:39	0.504	0.353	0.326	0.335	0.342	0.336	0.294	0.334	0.364	0.366		00:38:39	0.118	0.136	0.159	0.15	0.128	0.138	0.234	0.2	0.21	0.189	0.179	0.14		00:38:39	0.362	0.374	0.354	0.317	0.374	0.297	0.445	0.393	0.416	0.332	0.395	0.351
00:38:51	0.505	0.354	0.325	0.336	0.342	0.336	0.294	0.334	0.365	0.368		00:38:51	0.12	0.136	0.16	0.15	0.129	0.138	0.235	0.199	0.21	0.189	0.18	0.14		00:38:51	0.363	0.374	0.354	0.315	0.374	0.298	0.444	0.393	0.416	0.331	0.395	0.35
00:39:03	0.504	0.353	0.325	0.334	0.342	0.335	0.294	0.334	0.364	0.366		00:39:03	0.118	0.137	0.159	0.151	0.128	0.138	0.235	0.199	0.21	0.19	0.179	0.144		00:39:03	0.363	0.374	0.354	0.315	0.374	0.296	0.445	0.393	0.416	0.331	0.395	0.351
00:39:15	0.504	0.353	0.325	0.335	0.344	0.335	0.294	0.334	0.365	0.367		00:39:15	0.119	0.136	0.159	0.15	0.129	0.138	0.235	0.2	0.21	0.189	0.18	0.14		00:39:15	0.363	0.374	0.353	0.316	0.374	0.296	0.445	0.393	0.416	0.331	0.395	0.351
00:39:27	0.504	0.354	0.324	0.336	0.341	0.336	0.294	0.334	0.364	0.366		00:39:27	0.118	0.135	0.159	0.15	0.128	0.138	0.234	0.199	0.21	0.19	0.179	0.143		00:39:27	0.363	0.374	0.353	0.314	0.374	0.297	0.445	0.394	0.416	0.332	0.395	0.351
00:39:39	0.504	0.353	0.324	0.335	0.342	0.336	0.294	0.334	0.364	0.366		00:39:39	0.118	0.136	0.159	0.15	0.128	0.138	0.235	0.2	0.21	0.189	0.18	0.14		00:39:39	0.363	0.374	0.352	0.315	0.374	0.297	0.445	0.393	0.416	0.331	0.395	0.351
00:39:51	0.504	0.353	0.325	0.335	0.342	0.335	0.293	0.334	0.365	0.367		00:39:51	0.119	0.137	0.159	0.15	0.128	0.138	0.234	0.2	0.21	0.189	0.179	0.14		00:39:51	0.364	0.374	0.353	0.315	0.374	0.297	0.444	0.394	0.416	0.331	0.395	0.35
00:40:03	0.504	0.353	0.325	0.335	0.341	0.335	0.294	0.334	0.364	0.366		00:40:03	0.119	0.139	0.159	0.151	0.128	0.138	0.234	0.199	0.21	0.19	0.179	0.143		00:40:03	0.363	0.374	0.353	0.315	0.374	0.297	0.445	0.393	0.416	0.331	0.395	0.351
00:40:15	0.504	0.353	0.325	0.334	0.342	0.335	0.294	0.333	0.364	0.366		00:40:15	0.118	0.135	0.159	0.15	0.129	0.138	0.234	0.199	0.21	0.189	0.18	0.14		00:40:15	0.364	0.374	0.353	0.316	0.374	0.295	0.445	0.393	0.416	0.331	0.394	0.35
00:40:27	0.504	0.354	0.324	0.335	0.341	0.335	0.294	0.333	0.364	0.366		00:40:27	0.119	0.136	0.159	0.15	0.128	0.138	0.235	0.2	0.21	0.189	0.179	0.141		00:40:27	0.363	0.374	0.352	0.315	0.374	0.296	0.445	0.394	0.416	0.331	0.396	0.351
00:40:39	0.504	0.353	0.324	0.335	0.341	0.335	0.294	0.333	0.364	0.366		00:40:39	0.118	0.137	0.159	0.15	0.128	0.138	0.234	0.2	0.209	0.188	0.179	0.14		00:40:39	0.364	0.374	0.352	0.318	0.374	0.297	0.445	0.393	0.416	0.331	0.395	0.35
00:40:51	0.504	0.353	0.325	0.334	0.34	0.336	0.294	0.334	0.365	0.367		00:40:51	0.119	0.134	0.159	0.15	0.129	0.138	0.234	0.199	0.209	0.189	0.179	0.14		00:40:51	0.363	0.374	0.352	0.312	0.374	0.295	0.445	0.394	0.416	0.332	0.395	0.351
00:41:03	0.504	0.353	0.325	0.336	0.34	0.335	0.294	0.334	0.364	0.365		00:41:03	0.118	0.136	0.159	0.151	0.128	0.138	0.235	0.2	0.21	0.19	0.179	0.143		00:41:03	0.363	0.374	0.353	0.315	0.374	0.298	0.445	0.393	0.416	0.332	0.395	0.35
00:41:15	0.504	0.353	0.325	0.334	0.342	0.335	0.293	0.333	0.363	0.364		00:41:15	0.119	0.135	0.16	0.15	0.129	0.138	0.235	0.2	0.21	0.188	0.181	0.139		00:41:15	0.364	0.375	0.353	0.316	0.375	0.297	0.444	0.393	0.415	0.332	0.394	0.35
00:41:27	0.503	0.354	0.325	0.335	0.34	0.335	0.293	0.333	0.364	0.365		00:41:27	0.119	0.135	0.159	0.15	0.128	0.138	0.235	0.199	0.21	0.189	0.179	0.141		00:41:27	0.364	0.373	0.352	0.315	0.373	0.298	0.445	0.394	0.416	0.331	0.394	0.351
00:41:39	0.503	0.353	0.324	0.333	0.34	0.335	0.293	0.333	0.363	0.364		00:41:39	0.119	0.136	0.159	0.15	0.128	0.138	0.235	0.2	0.21	0.189	0.179	0.14		00:41:39	0.363	0.374	0.352	0.317	0.374	0.297	0.445	0.393	0.416	0.332	0.395	0.351
00:41:51	0.503	0.353	0.325	0.334	0.34	0.335	0.293	0.333	0.363	0.365		00:41:51	0.119	0.135	0.159	0.15	0.128	0.138	0.234	0.199	0.21	0.189	0.179	0.14		00:41:51	0.363	0.374	0.351	0.315	0.374	0.298	0.445	0.393	0.415	0.331	0.394	0.35
00:42:03	0.503	0.353	0.324	0.333	0.34	0.334	0.293	0.333	0.364	0.364		00:42:03	0.118	0.136	0.159	0.15	0.128	0.138	0.234	0.199	0.209	0.188	0.179	0.139		00:42:03	0.364	0.374	0.352	0.315	0.374	0.298	0.445	0.393	0.415	0.331	0.395	0.35
00:42:15	0.503	0.353	0.324	0.333	0.341	0.334	0.293	0.333	0.364	0.365		00:42:15	0.119	0.135	0.159	0.15	0.129	0.138	0.234	0.199	0.21	0.188	0.179	0.139		00:42:15	0.364	0.374	0.351	0.314	0.374	0.298	0.444	0.393	0.415	0.331	0.395	0.351
00:42:27	0.503	0.353	0.325	0.335	0.339	0.335	0.293	0.333	0.363	0.364		00:42:27	0.118	0.135	0.159	0.15	0.128	0.138	0.234	0.199	0.209	0.189	0.179	0.141		00:42:27	0.364	0.374	0.351	0.314	0.374	0.299	0.445	0.393	0.415	0.331	0.393	0.351
00:42:39	0.503	0.353	0.324	0.333	0.341	0.334	0.293	0.333	0.363	0.363		00:42:39	0.118	0.134	0.159	0.15	0.128	0.138	0.234	0.199	0.209	0.188	0.18	0.139		00:42:39	0.364	0.373	0.351	0.319	0.373	0.298	0.445	0.393	0.415	0.332	0.394	0.35
00:42:51	0.503	0.353	0.324	0.334	0.339	0.335	0.293	0.333	0.363	0.365		00:42:51	0.119	0.134	0.159	0.15	0.128	0.138	0.234	0.2	0.209	0.188	0.179	0.139		00:42:51	0.364	0.374	0.35	0.313	0.374	0.298	0.445	0.394	0.415	0.331	0.393	0.35
00:43:03	0.504	0.352	0.324	0.333	0.339	0.334	0.293	0.333	0.363	0.364		00:43:03	0.118	0.137	0.159	0.15	0.128	0.138	0.234	0.2	0.209	0.189	0.179	0.141		00:43:03	0.365	0.373	0.351	0.315	0.373	0.298	0.445	0.393	0.415	0.331	0.394	0.35
00:43:15	0.502	0.352	0.324	0.333	0.34	0.335	0.293	0.333	0.363	0.364		00:43:15	0.118	0.135	0.159	0.15	0.128	0.138	0.234	0.199	0.21	0.188	0.179	0.138		00:43:15	0.365	0.373	0.35	0.315	0.373	0.299	0.446	0.393	0.415	0.331	0.393	0.351
00:43:27	0.502	0.352	0.324	0.334	0.339	0.335	0.293	0.333	0.362	0.363		00:43:27	0.117	0.135	0.158	0.15	0.128	0.138	0.234	0.2	0.209	0.189	0.178	0.141		00:43:27	0.365	0.373	0.35	0.315	0.373	0.298	0.445	0.393	0.415	0.331	0.394	0.35
00:43:39	0.502	0.352	0.323	0.332	0.34	0.334	0.293	0.333	0.363	0.363		00:43:39	0.118	0.133	0.158	0.15	0.128	0.138	0.234	0.199	0.209	0.188	0.179	0.139		00:43:39	0.365	0.372	0.35	0.318	0.372	0.298	0.445	0.393	0.415	0.331	0.393	0.35
00:43:51	0.503	0.352	0.324	0.332	0.338	0.334	0.293	0.332	0.363	0.364		00:43:51	0.119	0.134	0.159	0.15	0.128	0.137	0.234	0.2	0.209	0.188	0.179	0.138		00:43:51	0.366	0.373	0.35	0.313	0.373	0.297	0.445	0.394	0.415	0.332	0.394	0.351
00:44:03	0.503	0.352	0.323	0.332	0.338	0.334	0.293	0.332	0.363	0.363		00:44:03	0.117	0.136	0.158	0.151	0.128	0.138	0.234	0.2	0.209	0.189	0.179	0.141		00:44:03	0.365	0.373	0.35	0.315	0.373	0.298	0.446	0.393	0.415	0.331	0.394	0.351
00:44:15	0.502	0.352	0.323	0.332	0.339	0.334	0.293	0.332	0.363	0.363		00:44:15	0.118	0.134	0.159	0.15	0.129	0.138	0.234	0.199	0.21	0.188	0.179	0.137		00:44:15	0.366	0.373	0.349	0.313	0.373	0.298	0.445	0.393	0.415	0.331	0.393	0.351
00:44:27	0.503	0.352	0.323	0.334	0.338	0.334	0.292	0.332	0.362	0.362		00:44:27	0.118	0.134	0.159	0.15	0.128	0.138	0.234	0.199	0.209	0.188	0.178	0.138		00:44:27	0.365	0.373	0.349	0.315	0.373	0.298	0.445	0.393	0.415	0.331	0.393	0.351
00:44:39	0.502	0.352	0.323	0.332	0.339	0.334	0.293	0.332	0.362	0.362		00:44:39	0.118	0.133	0.158	0.15	0.128	0.137	0.234	0.199	0.209	0.189	0.179	0.138		00:44:39	0.365	0.373	0.349	0.317	0.373	0.298	0.445	0.392	0.414	0.331	0.393	0.35
00:44:51	0.502	0.352	0.323	0.332	0.338	0.334	0.292	0.333	0.363	0.363		00:44:51	0.119	0.134	0.159	0.15	0.128	0.138	0.234	0.199	0.209	0.188	0.179	0.139		00:44:51	0.365	0.373	0.349	0.314	0.373	0.299	0.445	0.394	0.414	0.331	0.393	0.351
00:45:03	0.501	0.351	0.324	0.332	0.338	0.334	0.292	0.332	0.362	0.362		00:45:03	0.118	0.135	0.159	0.15	0.128	0.138	0.234	0.199	0.209	0.189	0.178	0.139		00:45:03	0.365	0.371	0.349	0.315	0.371	0.298	0.445	0.393	0.414	0.331	0.394	0.35
00:45:15	0.502	0.352	0.323	0.332	0.339	0.334	0.292	0.332	0.362	0.363		00:45:15	0.118	0.134	0.158	0.15	0.128	0.137	0.234	0.199	0.209	0.188	0.179	0.137		00:45:15	0.365	0.372	0.349	0.316	0.372	0.299	0.445	0.393	0.414	0.332	0.393	0.35
00:45:27	0.501	0.352	0.323	0.333	0.337	0.334	0.292	0.332	0.362	0.362		00:45:27	0.117	0.134	0.158	0.15	0.127	0.138	0.234	0.199	0.209	0.188	0.179	0.138		00:45:27	0.366	0.372	0.348	0.314	0.372	0.301	0.445	0.392	0.414	0.332	0.391	0.351
00:45:39	0.502	0.352	0.323	0.332	0.337	0.334	0.292	0.332	0.362	0.362		00:45:39	0.118	0.133	0.159	0.15	0.128	0.137	0.234	0.199	0.209	0.189	0.178	0.14		00:45:39	0.366	0.373	0.348	0.317	0.373	0.301	0.445	0.393	0.414	0.331	0.392	0.35
00:45:51	0.501	0.352	0.323	0.331	0.337	0.334	0.292	0.332	0.362	0.362		00:45:51	0.119	0.134	0.159	0.15	0.128	0.137	0.234	0.199	0.209	0.188	0.179	0.138		00:45:51	0.366	0.372	0.348	0.314	0.372	0.3	0.445	0.394	0.414	0.332	0.392	0.35
00:46:03	0.5	0.351	0.322	0.332	0.337	0.334	0.292	0.332	0.361	0.361		00:46:03	0.117	0.135	0.158	0.15	0.127	0.137	0.234	0.2	0.209	0.189	0.178	0.138		00:46:03	0.367	0.372	0.349	0.315	0.372	0.302	0.446	0.393	0.414	0.332	0.392	0.351
00:46:15	0.502	0.351	0.323	0.331	0.338	0.334	0.292	0.333	0.362	0.361		00:46:15	0.118	0.134	0.158	0.15	0.128	0.137	0.234	0.199	0.209	0.188	0.179	0.137		00:46:15	0.367	0.372	0.348	0.318	0.372	0.302	0.445	0.394	0.414	0.331	0.393	0.35
00:46:27	0.501	0.352	0.323	0.333	0.336	0.333	0.292	0.332	0.362	0.361		00:46:27	0.117	0.133	0.157	0.15	0.128	0.138	0.233	0.199	0.208	0.188	0.178	0.138		00:46:27	0.366	0.372	0.347	0.314	0.372	0.303	0.445	0.393	0.414	0.331	0.393	0.349
00:46:39	0.501	0.351	0.323	0.331	0.337	0.333	0.292	0.332	0.362	0.361		00:46:39	0.117	0.134	0.158	0.15	0.128	0.137	0.234	0.199	0.209	0.188	0.178	0.137		00:46:39	0.366	0.371	0.347	0.318	0.371	0.302	0.445	0.392	0.413	0.332	0.391	0.35
00:46:51	0.5	0.351	0.322	0.331	0.336	0.333	0.292	0.332	0.362	0.362		00:46:51	0.119	0.133	0.159	0.15	0.128	0.137	0.234	0.199	0.209	0.188	0.178	0.137		00:46:51	0.366	0.372	0.346	0.314	0.372	0.304	0.444	0.393	0.413	0.331	0.392	0.349
00:47:03	0.501	0.351	0.322	0.331	0.336	0.333	0.292	0.332	0.361	0.361		00:47:03	0.117	0.134	0.158	0.15	0.127	0.137	0.233	0.199	0.208	0.189	0.178	0.138		00:47:03	0.366	0.372	0.347	0.314	0.372	0.305	0.445	0.392	0.413	0.331	0.391	0.35
00:47:15	0.501	0.351	0.322	0.33	0.338	0.333	0.291	0.332	0.361	0.36		00:47:15	0.117	0.133	0.158	0.149	0.128	0.137	0.234	0.199	0.209	0.188	0.179	0.138		00:47:15	0.367	0.372	0.346	0.316	0.372	0.305	0.445	0.393	0.414	0.331	0.391	0.35
00:47:27	0.5	0.351	0.322	0.332	0.336	0.333	0.292	0.331	0.361	0.359		00:47:27	0.118	0.133	0.158	0.15	0.127	0.137	0.234	0.199	0.208	0.189	0.178	0.138		00:47:27	0.366	0.372	0.346	0.316	0.372	0.307	0.445	0.392	0.413	0.331	0.391	0.349
00:47:39	0.5	0.351	0.323	0.33	0.336	0.333	0.291	0.332	0.36	0.359		00:47:39	0.117	0.133	0.158	0.149	0.128	0.137	0.234	0.199	0.209	0.188	0.179	0.136		00:47:39	0.367	0.372	0.347	0.318	0.372	0.308	0.445	0.392	0.413	0.332	0.39	0.35
00:47:51	0.5	0.35	0.322	0.33	0.335	0.333	0.291	0.331	0.361	0.361		00:47:51	0.118	0.132	0.158	0.149	0.127	0.137	0.234	0.199	0.209	0.188	0.178	0.136		00:47:51	0.367	0.372	0.346	0.314	0.372	0.309	0.444	0.393	0.413	0.331	0.391	0.35
00:48:03	0.5	0.352	0.322	0.331	0.335	0.333	0.291	0.331	0.361	0.36		00:48:03	0.117	0.134	0.158	0.15	0.127	0.137	0.234	0.199	0.209	0.189	0.178	0.138		00:48:03	0.366	0.371	0.346	0.316	0.371	0.312	0.444	0.392	0.412	0.332	0.39	0.35
00:48:15	0.499	0.351	0.323	0.33	0.336	0.333	0.291	0.331	0.361	0.36		00:48:15	0.117	0.132	0.158	0.15	0.128	0.137	0.234	0.199	0.209	0.188	0.179	0.136		00:48:15	0.367	0.371	0.345	0.318	0.371	0.312	0.444	0.393	0.413	0.332	0.391	0.35
00:48:27	0.5	0.352	0.323	0.332	0.335	0.333	0.291	0.331	0.36	0.359		00:48:27	0.117	0.132	0.158	0.15	0.127	0.137	0.234	0.199	0.209	0.189	0.178	0.137		00:48:27	0.368	0.371	0.346	0.317	0.371	0.317	0.445	0.392	0.413	0.331	0.39	0.35
00:48:39	0.499	0.351	0.322	0.33	0.335	0.333	0.291	0.332	0.36	0.359		00:48:39	0.117	0.134	0.158	0.149	0.128	0.137	0.234	0.199	0.208	0.188	0.178	0.136		00:48:39	0.367	0.371	0.346	0.318	0.371	0.317	0.445	0.392	0.413	0.332	0.389	0.35
00:48:51	0.5	0.35	0.321	0.33	0.334	0.333	0.29	0.331	0.361	0.359		00:48:51	0.117	0.131	0.158	0.149	0.127	0.137	0.234	0.199	0.209	0.188	0.178	0.136		00:48:51	0.368	0.372	0.345	0.316	0.372	0.318	0.444	0.392	0.412	0.331	0.39	0.35
00:49:03	0.5	0.35	0.322	0.33	0.334	0.332	0.291	0.331	0.36	0.358		00:49:03	0.117	0.133	0.157	0.149	0.127	0.137	0.234	0.199	0.208	0.187	0.178	0.136		00:49:03	0.367	0.372	0.345	0.317	0.372	0.321	0.445	0.392	0.412	0.331	0.39	0.35
00:49:15	0.499	0.35	0.322	0.329	0.335	0.332	0.291	0.331	0.36	0.359		00:49:15	0.117	0.131	0.158	0.149	0.128	0.137	0.234	0.199	0.209	0.187	0.178	0.136		00:49:15	0.367	0.371	0.344	0.319	0.371	0.322	0.444	0.392	0.413	0.331	0.39	0.35
00:49:27	0.499	0.351	0.322	0.33	0.334	0.332	0.291	0.331	0.36	0.359		00:49:27	0.117	0.132	0.158	0.15	0.127	0.138	0.233	0.198	0.208	0.188	0.178	0.137		00:49:27	0.367	0.371	0.344	0.317	0.371	0.326	0.444	0.391	0.412	0.332	0.389	0.35
00:49:39	0.499	0.35	0.322	0.329	0.334	0.332	0.291	0.331	0.36	0.358		00:49:39	0.117	0.133	0.158	0.149	0.128	0.137	0.233	0.199	0.208	0.187	0.178	0.136		00:49:39	0.368	0.371	0.345	0.318	0.371	0.328	0.445	0.392	0.413	0.331	0.39	0.35
00:49:51	0.499	0.35	0.322	0.329	0.335	0.332	0.291	0.331	0.36	0.359		00:49:51	0.117	0.131	0.158	0.149	0.127	0.137	0.233	0.198	0.208	0.188	0.178	0.138		00:49:51	0.368	0.37	0.344	0.316	0.37	0.331	0.444	0.393	0.412	0.331	0.389	0.35
00:50:03	0.498	0.35	0.321	0.331	0.334	0.332	0.29	0.33	0.36	0.358		00:50:03	0.116	0.133	0.157	0.149	0.127	0.137	0.233	0.199	0.209	0.187	0.178	0.135		00:50:03	0.367	0.371	0.344	0.317	0.371	0.334	0.445	0.392	0.412	0.332	0.388	0.35
00:50:15	0.498	0.349	0.322	0.329	0.335	0.332	0.29	0.331	0.36	0.359		00:50:15	0.117	0.132	0.158	0.149	0.128	0.137	0.234	0.199	0.208	0.187	0.177	0.135		00:50:15	0.368	0.371	0.344	0.32	0.371	0.335	0.444	0.392	0.412	0.332	0.389	0.349
00:50:27	0.498	0.351	0.321	0.33	0.333	0.332	0.29	0.33	0.36	0.358		00:50:27	0.117	0.131	0.158	0.15	0.127	0.138	0.233	0.198	0.208	0.189	0.178	0.137		00:50:27	0.368	0.371	0.343	0.317	0.371	0.341	0.444	0.391	0.412	0.331	0.388	0.349
00:50:39	0.498	0.35	0.322	0.329	0.333	0.331	0.29	0.33	0.359	0.358		00:50:39	0.117	0.133	0.158	0.149	0.128	0.137	0.234	0.198	0.209	0.187	0.178	0.135		00:50:39	0.368	0.371	0.343	0.317	0.371	0.342	0.444	0.392	0.412	0.331	0.388	0.349
00:50:51	0.499	0.349	0.321	0.328	0.334	0.332	0.29	0.33	0.359	0.358		00:50:51	0.117	0.131	0.157	0.149	0.127	0.137	0.234	0.199	0.208	0.188	0.177	0.137		00:50:51	0.368	0.371	0.343	0.316	0.371	0.346	0.444	0.392	0.412	0.331	0.388	0.35
00:51:03	0.499	0.349	0.321	0.33	0.333	0.331	0.29	0.33	0.36	0.358		00:51:03	0.116	0.131	0.157	0.149	0.127	0.137	0.233	0.199	0.208	0.187	0.178	0.135		00:51:03	0.367	0.371	0.344	0.317	0.371	0.351	0.444	0.392	0.411	0.331	0.388	0.35
00:51:15	0.498	0.349	0.32	0.328	0.334	0.332	0.29	0.33	0.36	0.358		00:51:15	0.116	0.132	0.157	0.149	0.127	0.137	0.233	0.199	0.209	0.188	0.178	0.136		00:51:15	0.368	0.371	0.342	0.321	0.371	0.351	0.444	0.392	0.412	0.331	0.388	0.349
00:51:27	0.498	0.35	0.32	0.329	0.333	0.331	0.29	0.33	0.359	0.357		00:51:27	0.117	0.131	0.157	0.149	0.127	0.137	0.233	0.199	0.208	0.187	0.178	0.135		00:51:27	0.368	0.371	0.343	0.318	0.371	0.356	0.444	0.391	0.412	0.33	0.387	0.349
00:51:39	0.497	0.349	0.321	0.328	0.332	0.331	0.29	0.33	0.359	0.357		00:51:39	0.116	0.132	0.157	0.149	0.128	0.137	0.233	0.199	0.208	0.187	0.177	0.134		00:51:39	0.368	0.37	0.342	0.317	0.37	0.358	0.444	0.392	0.411	0.331	0.388	0.35
00:51:51	0.497	0.35	0.32	0.329	0.333	0.332	0.29	0.33	0.359	0.357		00:51:51	0.117	0.131	0.157	0.149	0.127	0.137	0.233	0.199	0.208	0.187	0.178	0.135		00:51:51	0.368	0.371	0.342	0.318	0.371	0.361	0.444	0.391	0.411	0.331	0.388	0.349
00:52:03	0.497	0.349	0.321	0.329	0.332	0.331	0.29	0.33	0.359	0.357		00:52:03	0.116	0.131	0.157	0.149	0.127	0.137	0.233	0.199	0.208	0.187	0.178	0.135		00:52:03	0.368	0.37	0.342	0.318	0.37	0.364	0.444	0.391	0.411	0.331	0.387	0.349
00:52:15	0.497	0.349	0.321	0.328	0.333	0.331	0.29	0.33	0.359	0.357		00:52:15	0.117	0.131	0.157	0.149	0.127	0.137	0.233	0.199	0.207	0.188	0.177	0.136		00:52:15	0.368	0.371	0.342	0.321	0.371	0.365	0.443	0.392	0.411	0.331	0.387	0.349
00:52:27	0.497	0.35	0.32	0.329	0.332	0.331	0.29	0.33	0.359	0.357		00:52:27	0.118	0.131	0.158	0.149	0.127	0.137	0.233	0.198	0.208	0.187	0.178	0.134		00:52:27	0.368	0.371	0.342	0.318	0.371	0.369	0.444	0.391	0.411	0.33	0.387	0.349
00:52:39	0.497	0.349	0.321	0.327	0.332	0.331	0.289	0.33	0.359	0.356		00:52:39	0.116	0.133	0.157	0.149	0.127	0.137	0.233	0.198	0.208	0.187	0.177	0.135		00:52:39	0.368	0.37	0.341	0.318	0.37	0.371	0.443	0.391	0.411	0.331	0.386	0.349
00:52:51	0.497	0.35	0.32	0.327	0.333	0.331	0.289	0.33	0.358	0.355		00:52:51	0.116	0.131	0.157	0.149	0.127	0.137	0.232	0.198	0.207	0.188	0.177	0.136		00:52:51	0.368	0.37	0.341	0.318	0.37	0.375	0.443	0.391	0.411	0.33	0.386	0.348
00:53:03	0.497	0.349	0.32	0.329	0.331	0.33	0.289	0.33	0.359	0.356		00:53:03	0.116	0.13	0.157	0.149	0.127	0.137	0.233	0.198	0.208	0.186	0.178	0.134		00:53:03	0.368	0.37	0.342	0.318	0.37	0.381	0.443	0.391	0.411	0.33	0.386	0.348
00:53:15	0.497	0.348	0.32	0.328	0.333	0.331	0.289	0.33	0.359	0.357		00:53:15	0.116	0.13	0.157	0.149	0.126	0.137	0.233	0.199	0.207	0.187	0.177	0.135		00:53:15	0.368	0.37	0.34	0.321	0.37	0.382	0.443	0.392	0.411	0.331	0.386	0.348
00:53:27	0.497	0.349	0.319	0.327	0.331	0.33	0.289	0.33	0.358	0.356		00:53:27	0.116	0.131	0.157	0.149	0.126	0.137	0.233	0.198	0.208	0.187	0.177	0.134		00:53:27	0.367	0.369	0.341	0.319	0.369	0.384	0.443	0.39	0.41	0.331	0.385	0.349
00:53:39	0.497	0.348	0.32	0.327	0.331	0.33	0.289	0.329	0.358	0.356		00:53:39	0.116	0.132	0.157	0.149	0.127	0.137	0.234	0.198	0.208	0.186	0.177	0.133		00:53:39	0.369	0.369	0.341	0.319	0.369	0.388	0.443	0.391	0.41	0.331	0.386	0.349
00:53:51	0.496	0.349	0.32	0.326	0.332	0.33	0.289	0.33	0.358	0.356		00:53:51	0.116	0.13	0.157	0.149	0.127	0.137	0.233	0.198	0.208	0.187	0.177	0.135		00:53:51	0.368	0.37	0.34	0.319	0.37	0.389	0.443	0.391	0.411	0.331	0.385	0.349
00:54:03	0.496	0.348	0.32	0.328	0.33	0.33	0.289	0.329	0.358	0.355		00:54:03	0.115	0.13	0.157	0.149	0.127	0.136	0.233	0.198	0.208	0.187	0.177	0.134		00:54:03	0.368	0.369	0.341	0.319	0.369	0.395	0.444	0.39	0.41	0.331	0.385	0.349
00:54:15	0.496	0.348	0.32	0.326	0.332	0.33	0.289	0.329	0.358	0.356		00:54:15	0.116	0.13	0.157	0.149	0.127	0.137	0.233	0.198	0.207	0.187	0.177	0.135		00:54:15	0.368	0.37	0.34	0.322	0.37	0.393	0.443	0.391	0.41	0.33	0.385	0.349
00:54:27	0.497	0.349	0.319	0.327	0.331	0.33	0.289	0.329	0.358	0.355		00:54:27	0.117	0.13	0.157	0.149	0.127	0.137	0.232	0.198	0.207	0.186	0.177	0.133		00:54:27	0.368	0.369	0.34	0.319	0.369	0.396	0.443	0.391	0.41	0.33	0.386	0.348
00:54:39	0.496	0.348	0.319	0.326	0.33	0.329	0.289	0.329	0.358	0.355		00:54:39	0.115	0.132	0.157	0.149	0.127	0.137	0.233	0.199	0.207	0.187	0.176	0.134		00:54:39	0.368	0.37	0.339	0.319	0.37	0.398	0.443	0.391	0.41	0.33	0.386	0.349
00:54:51	0.495	0.349	0.319	0.326	0.331	0.33	0.289	0.329	0.358	0.354		00:54:51	0.116	0.13	0.157	0.149	0.126	0.137	0.233	0.198	0.208	0.186	0.177	0.133		00:54:51	0.368	0.37	0.339	0.319	0.37	0.4	0.442	0.39	0.41	0.33	0.385	0.349
00:55:03	0.495	0.348	0.319	0.327	0.33	0.33	0.288	0.329	0.358	0.355		00:55:03	0.116	0.13	0.157	0.149	0.127	0.137	0.232	0.198	0.207	0.186	0.177	0.133		00:55:03	0.368	0.369	0.339	0.318	0.369	0.403	0.443	0.39	0.41	0.33	0.385	0.348
00:55:15	0.495	0.348	0.319	0.326	0.33	0.33	0.288	0.328	0.358	0.355		00:55:15	0.115	0.129	0.157	0.148	0.126	0.136	0.233	0.199	0.207	0.187	0.177	0.134		00:55:15	0.368	0.369	0.339	0.321	0.369	0.402	0.443	0.391	0.41	0.33	0.385	0.348
00:55:27	0.495	0.348	0.319	0.326	0.329	0.329	0.288	0.329	0.358	0.354		00:55:27	0.117	0.13	0.157	0.148	0.126	0.136	0.232	0.198	0.207	0.186	0.177	0.133		00:55:27	0.368	0.369	0.34	0.32	0.369	0.404	0.442	0.39	0.409	0.33	0.385	0.347
00:55:39	0.494	0.348	0.319	0.326	0.329	0.329	0.288	0.329	0.357	0.354		00:55:39	0.115	0.131	0.157	0.148	0.127	0.136	0.233	0.197	0.208	0.186	0.176	0.133		00:55:39	0.368	0.37	0.338	0.319	0.37	0.405	0.442	0.391	0.41	0.33	0.384	0.348
00:55:51	0.494	0.348	0.319	0.326	0.331	0.329	0.288	0.329	0.357	0.354		00:55:51	0.115	0.13	0.156	0.149	0.127	0.137	0.232	0.198	0.207	0.187	0.177	0.134		00:55:51	0.368	0.369	0.339	0.319	0.369	0.407	0.442	0.39	0.41	0.329	0.384	0.348
00:56:03	0.495	0.348	0.318	0.327	0.329	0.329	0.288	0.329	0.357	0.353		00:56:03	0.115	0.13	0.156	0.149	0.127	0.136	0.232	0.198	0.207	0.186	0.177	0.133		00:56:03	0.369	0.369	0.338	0.318	0.369	0.41	0.442	0.39	0.409	0.33	0.384	0.348
00:56:15	0.495	0.348	0.319	0.325	0.329	0.329	0.288	0.328	0.357	0.354		00:56:15	0.115	0.129	0.156	0.149	0.126	0.137	0.233	0.199	0.207	0.186	0.176	0.134		00:56:15	0.369	0.369	0.338	0.321	0.369	0.41	0.442	0.39	0.409	0.33	0.384	0.348
00:56:27	0.494	0.347	0.319	0.325	0.329	0.329	0.288	0.328	0.357	0.353		00:56:27	0.116	0.13	0.156	0.148	0.126	0.136	0.232	0.198	0.207	0.186	0.176	0.132		00:56:27	0.368	0.369	0.339	0.321	0.369	0.408	0.443	0.39	0.409	0.33	0.383	0.347
00:56:39	0.494	0.347	0.319	0.325	0.328	0.329	0.288	0.328	0.357	0.354		00:56:39	0.115	0.13	0.156	0.148	0.126	0.136	0.232	0.198	0.207	0.186	0.177	0.132		00:56:39	0.369	0.369	0.338	0.319	0.369	0.411	0.442	0.39	0.409	0.331	0.384	0.348
00:56:51	0.494	0.348	0.318	0.325	0.329	0.329	0.288	0.328	0.357	0.353		00:56:51	0.114	0.13	0.156	0.149	0.126	0.137	0.232	0.197	0.206	0.187	0.176	0.134		00:56:51	0.368	0.368	0.338	0.322	0.368	0.411	0.442	0.39	0.409	0.33	0.384	0.348
00:57:03	0.494	0.347	0.319	0.326	0.328	0.328	0.288	0.328	0.357	0.353		00:57:03	0.116	0.129	0.157	0.148	0.127	0.136	0.232	0.198	0.207	0.186	0.176	0.133		00:57:03	0.369	0.369	0.337	0.32	0.369	0.415	0.442	0.39	0.409	0.33	0.383	0.347
00:57:15	0.494	0.348	0.318	0.325	0.328	0.328	0.288	0.328	0.357	0.353		00:57:15	0.115	0.13	0.156	0.149	0.126	0.137	0.232	0.198	0.207	0.187	0.176	0.134		00:57:15	0.369	0.368	0.337	0.323	0.368	0.413	0.442	0.39	0.409	0.33	0.383	0.348
00:57:27	0.493	0.347	0.318	0.325	0.328	0.328	0.287	0.328	0.356	0.352		00:57:27	0.116	0.129	0.156	0.148	0.126	0.136	0.233	0.197	0.207	0.185	0.176	0.132		00:57:27	0.368	0.368	0.338	0.319	0.368	0.414	0.442	0.389	0.409	0.329	0.382	0.347
00:57:39	0.493	0.347	0.319	0.325	0.328	0.328	0.287	0.327	0.356	0.353		00:57:39	0.115	0.13	0.156	0.148	0.126	0.136	0.232	0.198	0.207	0.186	0.176	0.134		00:57:39	0.368	0.368	0.337	0.32	0.368	0.415	0.442	0.39	0.408	0.33	0.383	0.347
00:57:51	0.494	0.348	0.318	0.325	0.329	0.328	0.287	0.327	0.356	0.353		00:57:51	0.115	0.13	0.156	0.149	0.126	0.136	0.232	0.198	0.207	0.185	0.176	0.133		00:57:51	0.368	0.369	0.337	0.323	0.369	0.414	0.442	0.389	0.408	0.33	0.384	0.348
00:58:03	0.493	0.347	0.318	0.326	0.328	0.328	0.287	0.328	0.356	0.352		00:58:03	0.115	0.129	0.156	0.148	0.127	0.136	0.232	0.198	0.206	0.185	0.176	0.132		00:58:03	0.368	0.369	0.337	0.32	0.369	0.417	0.441	0.39	0.408	0.33	0.383	0.348
00:58:15	0.493	0.348	0.318	0.324	0.327	0.328	0.287	0.327	0.356	0.352		00:58:15	0.115	0.13	0.156	0.148	0.126	0.136	0.233	0.197	0.206	0.187	0.175	0.133		00:58:15	0.368	0.368	0.336	0.322	0.368	0.414	0.441	0.389	0.408	0.33	0.384	0.348
00:58:27	0.494	0.347	0.318	0.324	0.327	0.327	0.287	0.327	0.355	0.351		00:58:27	0.116	0.129	0.156	0.148	0.126	0.136	0.232	0.197	0.207	0.186	0.176	0.132		00:58:27	0.369	0.369	0.336	0.319	0.369	0.415	0.441	0.389	0.408	0.329	0.382	0.348
00:58:39	0.492	0.348	0.318	0.324	0.327	0.327	0.287	0.327	0.356	0.352		00:58:39	0.115	0.13	0.156	0.148	0.126	0.136	0.232	0.197	0.207	0.186	0.176	0.132		00:58:39	0.369	0.369	0.336	0.32	0.369	0.416	0.441	0.39	0.408	0.329	0.383	0.346
00:58:51	0.493	0.347	0.318	0.324	0.328	0.327	0.287	0.327	0.356	0.352		00:58:51	0.115	0.129	0.155	0.148	0.126	0.137	0.232	0.198	0.207	0.185	0.176	0.132		00:58:51	0.368	0.367	0.337	0.322	0.367	0.416	0.441	0.389	0.408	0.329	0.383	0.347
00:59:03	0.492	0.346	0.317	0.325	0.326	0.327	0.287	0.327	0.356	0.352		00:59:03	0.114	0.128	0.156	0.148	0.126	0.136	0.232	0.197	0.207	0.185	0.175	0.132		00:59:03	0.368	0.367	0.335	0.32	0.367	0.42	0.441	0.389	0.408	0.329	0.381	0.347
00:59:15	0.492	0.347	0.318	0.324	0.327	0.328	0.287	0.327	0.355	0.351		00:59:15	0.114	0.13	0.156	0.148	0.126	0.136	0.232	0.197	0.206	0.185	0.176	0.132		00:59:15	0.368	0.368	0.335	0.323	0.368	0.415	0.441	0.389	0.408	0.329	0.382	0.347
00:59:27	0.492	0.346	0.317	0.324	0.326	0.327	0.287	0.327	0.355	0.351		00:59:27	0.115	0.128	0.156	0.148	0.126	0.136	0.231	0.197	0.206	0.185	0.176	0.132		00:59:27	0.369	0.368	0.336	0.32	0.368	0.417	0.44	0.389	0.408	0.329	0.382	0.348
00:59:39	0.492	0.346	0.316	0.323	0.326	0.327	0.287	0.327	0.356	0.352		00:59:39	0.115	0.13	0.156	0.148	0.126	0.136	0.232	0.197	0.206	0.186	0.176	0.132		00:59:39	0.368	0.367	0.335	0.32	0.367	0.415	0.44	0.39	0.408	0.329	0.382	0.347
00:59:51	0.492	0.346	0.317	0.323	0.327	0.327	0.286	0.327	0.355	0.351		00:59:51	0.115	0.129	0.156	0.148	0.126	0.136	0.232	0.197	0.206	0.185	0.176	0.132		00:59:51	0.368	0.367	0.336	0.319	0.367	0.415	0.441	0.388	0.408	0.329	0.381	0.347
01:00:03	0.491	0.346	0.317	0.324	0.326	0.327	0.286	0.327	0.355	0.351		01:00:03	0.114	0.128	0.156	0.148	0.126	0.136	0.232	0.198	0.206	0.185	0.176	0.132		01:00:03	0.369	0.367	0.335	0.319	0.367	0.419	0.44	0.39	0.407	0.328	0.382	0.347
[truncated: 3 more columns]
