# Supplementary material for: Fibrinogen αC-subregions critically contribute blood clot fibre growth, mechanical stability, and resistance to fibrinolysis
Source: eLife. 2021 Oct 11;10:e68761. doi: 10.7554/eLife.68761 (PMC8553339; doi:10.7554/eLife.68761)
Supplement: Figure 2—source data 1. [file elife-68761-fig2-data1.xlsx]

## Sheet: Figure 2  source data 
	Figure 2B														Figure 2D
	Experiment 1	Experiment 2	Experiment 3			Experiment 1	Experiment 2	Experiment 3			Experiment 1	Experiment 2	Experiment 3		WT														A390											a220
	Fibre Count	Fibre Count	Fibre Count			Fibre Count	Fibre Count	Fibre Count			Fibre Count	Fibre Count	Fibre Count		Fibre diameter size nm															Fibre diameter size nm										Fibre diameter size nm
WT clot 1 area 1	40	31	25		a390 clot 1 area 1	55	44	50		a220 area 1	41	24	17			Clot 1			Clot 2			Clot 3			Clot 4				Fibre	Clot 1			Clot 2			Clot 3					Clot 1					Clot 2
	35	25	26			37	42	46			31	23	42		1	73.593	79.8	104.857	51.685	109.181	30.187	51.095	67.669	80.191	93.87	91.24	83.009		1	69.816	70.36	44.728	51.095	99.87	49.505	56.866	43.011	37.984		Fibre	area 1	area 2	area 3	area 4	area 5	area 1	area 2	area 3	area 4
	34	26	22			57	44	43			52	35	28			54.444	69.825	79.8	68.952	89.33	33.291	56.584	88.159	83.889	96.599	92.313	90.421			53.986	63.397	36.168	49.628	59.259	35.005	56.866	53.151	44.61		1	84.577	109.377	91.057	77.488	84.012	81.443	77.588	60.727	89.465
	33	31	21			50	37	46			34	29	27			56.444	84.935	70.003	66.048	84.513	40.924	42.691	67.669	45.416	95.779	66.767	92.773			58.67	67.334	36.168	63.554	61.083	44.829	55.762	64.031	35.965			74.793	101.554	95.884	68.952	105.016	94.344	63.871	98.5	55.484
	37	23	27			48	46	56			43	37	31		2	103.959	78.86	36.31	77.487	104.336	139.312	53.68	116.571	80.794	69.295	69.124	66.915		2	36.492	57.731	70.857	51.813	63.241	84.304	80.421	61.846	63.088			84.723	90.833	128.395	66.418	84.012	93.956	88.238	80.987	70.182
	27	21	22			54	48	46			40	24	13			114.29	87.246	52.071	56.444	99.38	134.087	59.76	102.081	97.707	51.942	77.68	75.968			35.444	50.485	63.255	51.813	41.903	66.418	56.866	60	37.984		2	84.577	99.136	94.989	105.945	102.057	104.988	102.335	94.525	108.952
	31	26	26			46	42	45			41	31	27			99.132	71.931	45.164	79.362	119.21	158.809	49.628	92.543	95.139	58.232	58.088	71.41			49.368	67.334	68.511	55.485	53.416	70.36	82.557	65.765	49.121			82.803	103.448	86.243	105.016	98.638	112.609	106.737	99.624	94.458
	37	27	18			45	46	47			54	12	28		3	70.879	82.256	90.328	99.01	95.847	69.479	64.516	44.776	86.031	109.113	154.565	87.246		3	41.334	24.752	33.402	34.739	49.629	91.282	49.875	50.249	36.31			58.232	80.794	103.114	105.016	93.929	120.253	87.246	54.725	82.595
	40	34	25			48	47	43			39	33	25			84.593	61.692	75.475	84.304	93.638	79.404	42.402	46.935	70.531	86.887	109.294	81.191			38.174	30.113	35.361	44.94	55.212	70.88	74.144	57.009	34.913		3	64.868	89.893	118.724	74.257	94.189	84.96	65.029	83.396	108.839
	36	30	21			54	45	51			36	45	33			59.816	88.379	74.813	84.012	99.874	64.516	71.056	49.251	65.722	87.029	102.31	71.931			57.151	50.485	37.216	33.291	44.169	50.968	98.998	52.201	45.983			95.569	104.499	91.057	107.096	103.96	84.96	62.493	89.688	122.869
	40	22	25			51	37	46			33	21	16		4	69.483	55.762	79.956	109.918	108.955	69.656	84.367	71.233	71.045	36.219	89.33	128.713		4	45.39	28.004	35.361	42.402	57.59	60.428	76.294	40.311	71.931			60.729	115.001	90.115	117.359	84.158	78.821	71.145	73.455	91.507
	32	18	27			62	51	51			46	23	26			84.303	65.601	84.788	101.575	99.256	77.043	74.441	90.788	81.987	33.374	104.336	102.82			35.088	53.548	39.229	59.553	52.495	50.968	74.144	40	60.88		4	54.726	79.584	53.187	64.356	82.985	76.662	109.498	88.995	113.166
	46	25	26			47	41	46			43	29	27			64.356	55.762	65.601	102.057	109.294	73.275	59.76	85.884	66.091	35.179	89.33	93.707			35.444	40.823	34.255	54.816	52.495	46.703	67.1	65.765	53.717			86.887	79.431	54.321	54.68	68.952	71.901	95.937	94.656	124.363
	38	23	30			55	42	47			34	25	31		5	49.504	50.124	65.601	67.334	159.814	109.294	77.043	64.868	74.546	93.87	86.671	45.164		5	38.174	55.438	40.437	36.129	67.168	29.703	58.377	82.462	17.983			49.751	64.793	46.587	55.348	87.723	77.295	113.951	58.231	86.669
	33	27	27			52	48	53			37	22	24			64.356	49.875	55.762	98.246	156.937	109.181	67.501	55.624	59.318	84.431	84.804	65.601			29.228	55.348	27.739	49.628	97.398	54.68	56.866	68.007	24.938		5	119.817	70.531	49.383	113.969	99.503	79.626	55.089	36.218	97.879
	48	20	32			52	38	43			56	25	34			64.356	60.676	53.717	73.093	176.231	94.423	67.501	49.751	59.318	84.723	66.212	80.421			36.146	53.318	40.437	35.787	73.413	37.702	42.613	54.083	35.965			157.327	103.916	24.691	118.915	114.826	74.073	74.813	69.294	113.383
	39	33	27			53	39	49			40	27	28		6	93.928	50.863	53.717	97.513	80.788	80.788	62.183	70.71	64.039	80.989	106.208	95.286		6	52.332	45.641	63.255	64.516	31.62	68.774	40.21	53.851	52.071			138.392	59.318	46.587	99.134	124.157	83.95	49.875	41.025	103.623
	48	21	28			44	51	48			40	31	38			82.984	47.316	89.776	93.011	81.296	88.36	66.582	75.779	60.131	86.887	126.527	67.838			46.213	42.006	55.824	49.875	45.529	64.546	60.057	51.478	70.534		6	91.737	69.666	49.383	75.566	108.573	66.437	81.801	84.575	80.786
	39	31	28			52	41	55			31	26	30			70.879	47.316	79.956	86.456	73.777	84.221	71.574	91.467	73.232	85.015	70.534	60.264			51.607	44.279	52.814	64.516	39.814	60.428	55.762	26.926	56.866			75.779	74.056	24.691	80.588	105.016	74.073	95.937	90.785	77.519
	40	26	30			58	38	48			17	25	39		7	40.822	100.867	94.894	74.257	139.312	71.056	49.628	84.723	68.613	109.113	64.707	61.692		7	53.986	62.03	49.036	56.147	93.827	50.485	63.087	43.011	53.018			91.737	59.113	79.166	80.588	98.264	34.918	89.914	84.575	126.328
WT clot 1 area 2	29	26	28		a390 clot 1 area2	36	53	47		a220 area 2	31	26	24			31.309	84.935	104.738	113.969	138.958	62.775	45.754	79.602	61.724	116.571	59.965	72.619			61.186	64.356	78.947	71.574	93.957	60.335	58.163	42.426	49.374		7	80.989	96.783	113.687	99.504	69.307	108.753	58.164	78.661	109.178
	23	22	25			29	47	40			45	24	36			42.297	75.968	83.009	109.023	114.575	65.275	38.76	84.723	52.365	98.753	68.946	71.41			62.807	37.702	74.69	49.129	79.012	61.234	42.904	89.022	60.88			80.221	96.783	87.367	99.504	84.158	101.804	76.131	77.233	119.207
	39	16	26			36	40	47			37	26	29		8	45.641	91.014	89.22	93.405	124.169	95.847	44.388	75.287	73.232	105.773	113.169	97.989		8	51.607	39.604	35.088	66.212	86.384	70.88	30.338	50.249	33.457			90.788	77.106	90.654	112.017	69.483	84.095	49.975	49.998	124.165
	30	28	25			35	41	47			39	41	43			56.444	74.979	80.422	105.945	119.21	103.626	53.68	77.235	87.152	77.714	113.386	84.934			56.71	44.829	39.717	49.875	79.627	81.945	35.267	41.231	34.913		8	84.723	70.531	97.398	99.01	87.583	101.684	49.875	79.6	75.914
	25	25	29			26	47	55			26	27	35			50.968	74.979	67.838	112.888	126.527	102.31	49.628	85.884	87.152	84.577	111.965	84.934			43.119	45.641	39.717	54.59	79.627	65.113	54.862	38.079	37.984			95.05	53.284	108.304	107.096	71.397	76.821	88.379	64.866	84.802
	24	19	28			33	40	51			24	30	37		9	111.687	80.576	80.576	81.194	97.881	126.527	73.274	51.222	44.06	86.887	109.21	98.999		9	47.288	39.912	52.631	35.092	28.795	39.604	37.983	54.083	49.374			104.478	73.232	108.304	117.672	67.334	33.127	91.694	84.721	56.583
	29	28	23			32	49	56			34	35	30			92.482	110.404	56.867	99.01	104.69	135.458	51.095	45.868	46.733	89.69	104.336	58.164			42.533	38.665	48.245	73.777	39.814	66.048	58.377	47.17	60.058		9	60.115	59.318	90.789	80.588	81.194	62.464	70.886	87.037	71.572
	31	25	24			34	55	52			33	21	30			97.722	85.227	49.121	84.158	139.841	97.755	77.521	64.677	53.056	84.431	104.69	88.238			49.621	31.699	48.444	67.501	42.481	45.641	40.21	69.462	74.145			67.669	59.522	69.837	80.588	119.838	84.96	80.576	82.8	59.758
	28	31	23			30	52	43			16	21	19		10	100.116	47.316	50.124	103.96	108.842	80.788	63.554	51.222	83.889	69.652	93.638	93.174		10	43.119	59.612	52.631	52.755	57.59	64.356	47.052	54.083	62.493			65.438	75.194	93.175	105.945	105.945	72.912	60.88	70.708	58.086
	34	34	24			32	41	54			10	30	17			96.12	53.717	99.875	84.304	91.105	99.256	70.534	71.233	76.948	85.015	86.813	88.379			52.332	59.612	52.631	52.755	69.838	54.68	49.875	54.083	55.762		10	52.886	76.632	67.168	75.404	81.954	117.795	89.914	56.724	55.484
	40	24	21			26	46	52			34	37	8			99.502	56.867	64.838	99.01	117.964	84.367	72.259	48.999	63.085	96.887	66.583	102.82			49.621	79.208	37.474	35.092	75.379	44.829	37.983	62.65	53.948			42.798	57.659	74.074	66.418	77.487	93.174	85.373	85.013	73.775
	36	29	25			28	45	45			29	44	15		11	54.679	78.86	83.606	66.418	64.707	49.875	59.965	20.513	70.531	53.584	98.258	74.813		11	55.365	66.418	49.036	51.813	34.568	52.624	45.982	39.051	53.018			29.01	93.889	132.967	56.008	77.329	87.505	99.75	55.622	64.514
	39	30	32			27	44	50			29	29	13			64.356	69.468	91.695	73.093	71.056	65.275	53.68	9.95	98.646	89.69	112.514	63.088			45.113	64.547	55.478	61.386	54.545	62.029	53.018	49.497	49.373		11	87.029	57.659	109.647	84.304	96.121	48.636	114.821	53.813	101.825
	34	28	31			36	50	48			33	32	18			64.546	99.751	109.499	95.224	83.191	51.095	66.582	31.856	93.596	56.287	109.294	60.88			40.1	46.965	49.036	71.056	44.444	59.817	45.163	70.71	31.936			120.435	94.756	91.857	69.484	77.011	105.682	99.75	46.934	103.266
	34	30	28			31	42	41			35	23	21		12	113.104	42.613	116.328	100.97	97.755	33.291	52.755	34.826	62.311	66.933	105.159	94.631		12	35.444	68.774	48.444	21.055	98.889	57.732	60.264	49.244	60.264			99.502	109.377	66.254	84.158	79.824	93.174	129.771	28.143	85.381
	50	28	22			27	50	45			31	34	18			104.898	56.867	129.772	97.261	73.777	65.275	56.584	45.868	66.091	75.942	87.941	80.421			50.375	73.594	53.357	40.011	98.889	46.703	65.029	40.311	37.984		12	88.988	88.121	53.415	117.692	89.246	126.48	74.145	56.724	81.393
	37	31	24			29	55	46			23	26	23			84.593	60.265	130.059	115.57	97.503	44.388	59.76	77.235	44.06	64.868	117.964	84.934			46.213	73.594	44.078	26.725	123.457	35.698	65.029	35.355	38.954			64.677	81.987	63.241	80.588	64.356	94.86	74.145	102.078	56.583
	38	24	29			30	47	47			22	33	37		13	56.444	74.813	55.089	109.023	73.275	67.501	83.191	93.474	70.531	55.624	77.043	45.983		13	25.963	56.444	100.972	64.707	48.886	74.914	35.267	41.231	67.1			83.398	60.131	87.923	80.555	62.619	113.686	74.145	75.777	49.128
	22	25	30			30	61	52			39	29	43			64.356	79.956	29.925	118.915	71.056	55.486	84.804	95.698	56.166	53.814	80.022	69.289			30.075	48.757	79.069	40.924	75.218	64.356	33.457	46.098	38.954		13	104.95	45.416	72.912	123.762	76.852	95.883	100.866	121.963	97.753
	33	16	24			32	42	53			35	42	50			45.641	109.726	29.925	123.969	48.878	70.184	61.386	69.117	50.717	46.935	64.707	69.289			30.075	50.968	87.059	45.754	57.59	45.641	38.953	40.311	53.018			89.69	64.229	94.345	126.891	80.588	71.22	77.427	114.856	100.363
a390 clot 1 area 3	31	29	25		a390 clot 1 area 3	49	53	38		a220 area 3	18	26	28		14	80.587	91.966	76.295	39.912	77.203	74.442	46.819	48.999	82.577	85.16	111.525	71.931		14	15.038	44.829	65.789	42.691	64.198	54.455	31.935	52.201	44.888			84.723	113.728	143.209	109.023	94.189	66.437	69.468	84.721	108.952
	33	20	28			43	40	35			28	31	52			67.333	86.098	84.788	50.968	66.583	78.468	28.938	48.999	56.166	80.221	134.362	81.191			40.412	42.586	79.069	28.074	61.876	54.68	44.609	44.721	50.124		14	102.565	75.355	138.271	133.755	94.059	74.073	85.808	70.357	115.854
	29	28	18			46	42	33			41	27	34			76.851	107.666	52.071	53.318	35.787	87.801	47.081	70.71	42.089	74.793	119.52	75.968			25.559	45.641	83.448	45.754	46.588	44.554	26.858	54.083	42.613			137.245	101.075	123.456	108.911	79.824	87.505	81.801	96.083	115.854
	41	24	29			45	48	42			29	19	22		15	74.421	110.404	74.145	140.196	163.245	54.816	80.022	80.989	74.546	78.664	60.375	67		15	39.149	37.702	52.814	59.76	71.902	72.08	55.837	75	45.983			112.794	83.744	79.78	108.911	85.459	90.654	71.931	60.113	124.462
	38	30	37			43	38	41			20	20	23			84.303	80.576	58.378	126.213	269.608	73.777	75.916	84.577	65.722	75.942	51.813	51.35			33.625	26.659	57.186	58.088	72.913	61.234	64.837	65.765	49.374		15	59.908	99.136	57.589	141.761	120.552	97.772	40.011	69.294	100.486
	34	25	22			28	45	36			33	26	22			99.132	80.576	58.164	126.213	190.986	85.671	69.656	96.599	49.261	56.287	55.486	49.875			32.096	38.665	57.017	63.554	75.379	53.318	70.533	70.178	49.374			56.287	73.232	66.254	155.37	132.835	80.993	60.578	66.932	98.88
	43	28	30			47	51	34			27	18	57																												56.725			149.666	122.268	134.787	55.485	66.932	84.365
	26	25	27			50	41	38			30	27	29
	44	21	28			45	49	40			42	24	14
	36	35	25			47	46	34			25	42	20
	44	32	21			40	44	31			29	28	25
	37	27	26			49	46	29			42	30	22
	43	29	25			43	54	38			20	29	35
	41	30	28			48	48	30			16	22	31
	46	21	24			35	39	39			16	18	43
	34	20	23			42	48	38			49	24	33
	41	23	23			44	53	44			32	21	32
	34	27	21			47	57	35			32	35	32
	38	27	29			38	59	43			44	26	23
	39	32	31			46	58	36			26	24	32
WT clot 2 area 1	25	22	26		a390 clot 2 area 1	30	40	33		a220 area 4	28	23	32
	27	29	31			36	42	43			36	37	28
	23	21	32			28	35	41			40	25	19
	26	29	19			36	37	46			20	31	31
	29	23	34			31	38	43			26	14	30
	29	22	34			39	45	39			29	30	38
	26	28	26			39	32	38			50	20	52
	26	22	35			29	42	40			23	45	29
	21	25	31			37	48	49			30	30	16
	20	28	32			29	39	48			7	31	32
	22	31	26			31	32	41			42	31	26
	28	26	22			28	32	41			31	20	31
	27	26	23			29	36	45			39	22	38
	30	27	21			27	26	55			31	29	37
	17	23	27			35	40	51			31	21	22
	24	27	29			37	37	49			27	13	29
	25	24	28			41	39	46			32	32	30
	26	37	28			34	41	41			34	34	33
	21	29	33			35	48	51			31	27	33
	19	23	26			29	37	43			27	44	39
WT clot 2 area 2	23	30	30		a390 clot 2 area 2	36	39	41		a220 area 5	46	17	42
	13	30	28			30	35	39			44	30	31
	24	31	33			46	35	43			42	30	41
	18	21	35			28	36	51			51	9	19
	19	25	40			35	37	44			37	8	33
	22	20	35			35	40	52			46	19	50
	24	27	33			40	37	46			54	16	34
	23	23	29			33	42	53			56	29	37
	20	30	37			31	42	39			46	20	29
	26	20	34			32	42	41			40	38	26
	19	29	20			27	32	37			37	15	29
	17	24	25			42	39	45			46	19	31
	21	27	25			33	36	37			47	15	35
	22	30	30			30	42	47			32	29	29
	20	25	21			35	31	41			31	21	34
	19	21	26			37	39	51			45	10	30
	22	34	43			35	47	40			47	19	41
	16	33	27			34	40	41			30	14	33
	22	27	42			36	37	43			51	8	38
	16	36	34			30	39	44			40	23	41
a390 clot 2 area 3	20	27	32		a390 clot 2 area 3	36	26	49		a220 area 6	29		46
	15	30	28			33	45	46			41		51
	16	29	34			38	30	46			53		49
	23	26	31			31	33	43			44		53
	17	24	31			34	42	50			44		43
	23	30	27			41	36	52			50		44
	23	30	31			33	38	50			33		40
	26	28	33			35	35	56			32		39
	15	35	30			43	42	47			34		37
	31	27	31			33	44	37			34		43
	20	29	34			33	37	45			36		46
	21	29	29			30	38	59			33		38
	20	23	34			33	35	46			31		55
	19	28	35			40	39	49			39		48
	15	26	43			33	42	42			42		45
	19	30	33			37	47	46			51		48
	27	31	40			40	34	54			59		39
	21	26	28			36	40	42			47		50
	25	38	29			36	37	45			34		51
	19	34	40			31	38	53			40		38
					a390 clot 1 area 4		42			a220 area 7			40
							46						22
							41						50
							43						34
							47						44
							47						29
							49						33
							46						24
							51						17
							44						38
							56						36
							49						37
							42						29
							53						31
							46						29
							52						37
							45						33
							61						31
							49						35
							44						28
[truncated: 3 more columns]
