# Supplementary material for: Fibrinogen αC-subregions critically contribute blood clot fibre growth, mechanical stability, and resistance to fibrinolysis
Source: eLife. 2021 Oct 11;10:e68761. doi: 10.7554/eLife.68761 (PMC8553339; doi:10.7554/eLife.68761)
Supplement: Figure 3—source data 1. [file elife-68761-fig3-data1.xlsx]

## Sheet: Figure 3 source data 1
	10 min of clotting									20 min of clotting									30 min of clotting
		WT			Alpha 390			Alpha 220			WT			Alpha 390			Alpha 220			WT			Alpha 390			Alpha 220
	Sample number	Oligomer length (nm)		Sample number	Oligomer length (nm)		Sample number	Oligomer length (nm)		Sample number	Oligomer length (nm)		Sample number	Oligomer length (nm)		Sample number	Oligomer length (nm)		Sample number	Oligomer length (nm)		Sample number	Oligomer length (nm)		Sample number	Oligomer length (nm)
	13-4-18 (10-2)	186		18-4-18 (10-1)	184		17-4-18 (10-2)	121		13-4-18 (20-1)	380		18-4-18 (20-1)	421		17-4-18 (20-1)	365		17-7-18 (30-1)	440		12-7-18 (30-1)	178		11-7-18 (S1) (30-1)	352
		199			128			75			409			388			260			418			509			213
		155			92			90			215			603			174			227			298			169
		443			419			95			383			386			129			329			234			189
		227			274			87			370			226			153			365			832			133
		119			196						699			100			192			243			280			98
		203			303		17-4-18 (10-3)	116			454			497			166			273			132			173
		233			195			164			313			214			239			211						138
		160			156			117			374			185			256			146		12-7-18 (30-2)	364			178
		270			115			71			326			190			149			180			173
		213			92			93			372			303									666		11-7-18 (S1) (30-2)	197
		154			111						205			132		17-4-18 (20-2)	214		17-7-18 (30-2)	332			219			298
		215			164		17-4-18 (10-4)	92			163			130			102			488			202			165
					118			98			187			141			254			242			221			134
	13-4-18 (10-3)	118			117			114			196						131						544			113
		237			131			103			137		18-4-18 (20-2)	364			277		17-7-18 (30-4)	407			329			158
		125			263			88			102			435			138			240			217			117
		309			150			86			123			152			210			194						165
		150			98			140			128			148			147			290		12-7-18 (30-3)	456			161
		362						85						292			285			220			194
		286		18-4-18 (10-2)	142					13-4-18 (20-2)	470			273			188			487			465		11-7-18 (S1) (30-3)	181
		176			141		17-4-18 (10-5)	112			224			175			148			252			611			171
		150			172			131			111			130			181			202			368			168
		193			326			94			564			109			206									280
		246			152			106			188			316			98		17-7-18 (30-5)	1754		12-7-18 (30-4)	700			133
					360			65			176			158			149			285			494			208
	13-4-18 (10-5)	266			132						364						155			237			446
		238			412		26-7-18 (10-1)	116			456		18-4-18 (20-3)	328			215			197			189		11-7-18 (S1) (30-4)	441
		164			349			141			188			401						151			489			246
		137			185			153			201			161		17-4-18 (20-3)	192			163			559			185
		123			102			139			194			287			194									154
		155									2124			349			176		17-7-18 (30-6)	2207		12-7-18 (30-5)	545			266
		224		18-4-18 (10-3)	327		26-7-18 (10-2)	129			133			265			169			206			94			167
		128			349			145			175			168			118			228			97			140
		258			168			78			194			612			194			533			255			189
		258			188			100						241			152			251			184
		206			275					13-4-18 (20-3)	608			115			227			148			172		11-7-18 (S1) (30-5)	230
		222			249		26-7-18 (10-3)	109			204			254			138			645			176			203
		199			116			117			238			421			152			440			174			210
		251			108			103			362			359			286			338						142
		118			100			102			182			283			267					25-7-18 (S1) (30-1)	511
		197			165			67			342			168			190		17-7-18 (30-7)	226			1423		11-7-18 (S1) (30-6)	295
		168			122						2022			481			286			784			768			276
					101		26-7-18 (10-4)	150			417			101			148			377			471			186
	13-4-18 (10-6)	262						114			218			94			176						181			205
		151		18-4-18 (10-4)	440			120			566						190		18-8-18 (30-1)	288						156
		178			208			108			257		18-4-18 (20-4)	726			169			338		25-7-18 (S1) (30-2)	343
		177			239			81			188			374			158			594			278		11-7-18 (S1) (30-7)	260
		171			269						164			694			155			231			707			206
		167			117		26-7-18 (10-5)	118			181			310			98			148			349			134
		107			185			143			392			153						137			381			188
		124			183						164			278		17-4-18 (20-4)	202			190			288			138
					93		23-8-18 (10-1)	139			215			229			293									202
	13-4-18 (10-7)	205			184			77			327			672			170		18-8-18 (30-2)	227		25-7-18 (S1) (30-3)	295			131
		155			161			130						795			238			314			313			134
		428			135			166		13-4-18 (20-4)	736			1113			170			198			176
		210			145			186			377			288			101			1010			270		11-7-18 (S2) (30-1)	191
		195			191			117			172			257			364			716			326			305
		194			132			147			198			408			178			705			377			243
		130			141			96			236			122			139			218			198			316
		191			179			131			140			174			248			293						213
		154			154			71			351						200			1134		25-7-18 (S1) (30-4)	821			127
		237			146						292		18-4-18 (20-5)	271			104						354			242
		244					23-8-18 (10-2)	145			314			156			218		18-8-18 (30-3)	270			317			150
		155		18-4-18 (10-5)	172			125			204			432			168			569			248			132
		144			286			106			195			162			155			248			229			163
		111			176			120			338			177			308			214			347			176
		162			245			183			404			162			159
		131			495			125			267			152			127		18-8-18 (30-4)	584		25-7-18 (S1) (30-5)	330		11-7-18 (S2_MM2) (30-1)	750
		122			289						153			436			116			334			228			167
					188		23-8-18 (10-3)	162			381			204			125			218			253			168
	5-7-18 (10-1)	332			192			147			160			568			248			122			253			204
		296			200			94						256			123			633			203			162
		159			376			88		13-4-18 (20-5)	165			589			89			216			359			238
		138			566			132			548			367			237			163			609			167
		242			257			103			264			176						137			171			123
		103			295			100			279			189		17-4-18 (20-6)	134						152			160
					173						341			186			196		18-8-18 (30-5)	956						190
	5-7-18 (10-2)	162			146		23-8-18 (10-4)	146			365			104			113			248		25-7-18 (S2) (30-1)	269			157
		215			173			109			263			226			118			348			368			144
		124			146			119			170			126			171			441			227			122
		147			171			140			242						250			254			332			300
		138			239			297			201		6-7-18 (20-1)	160			150			277			485			128
		200			174			95			238			175			186						242			222
		143			266			107			152			219			347		21-8-18 (S1) (30-1)	193			467			138
		162			242			104			151			301			183			1001			327
					140			102			130			322			136			302					11-7-18 (S2_MM2) (30-2)	292
	5-7-18 (10-3)	225			119									904			189			533		25-7-18 (S2) (30-2)	560			208
		194					23-8-18 (10-5)	100		5-7-18 (20-1)	219			427			156			273			227			272
		333		6-7-18 (10-1)	509			192			226			231			370			364			211			169
		359			331			184			295			1800			145			432			1147			235
		133			420			145			132			176			146			293						314
		210			283			114			124			153			143			384		25-7-18 (S2) (30-3)	262			149
		372			225			99			291			144						296			667			186
					351			88			169					4-7-18 (20-1)	113			277			290			169
	5-7-18 (10-4)	147			151						373		6-7-18 (20-2)	162			140			372			244			138
		368			137		23-8-18 (S2) (10-1)	273			225			265			142						358			175
		215			195			174			360			389			273		21-8-18 (S1) (30-2)	300			589			263
		261			136			196			327			188			105			337			140			153
		181			163			243			166			1522			149			727						136
		195			283			198						360			82			282		25-7-18 (S2) (30-4)	282			188
		245			202			174		5-7-18 (20-2)	212			205			92			210			530
		608			171			139			335			256						309			145		11-7-18 (S2_MM2) (30-3)	234
		279			188			127			271			161		4-7-18 (20-2)	188			220			288			207
		250			287			198			254			111			105			260			252			149
		89			144			226			375			181			156			180			430			211
		162						100			310			256			193			438			347			146
		124		6-7-18 (10-2)	452			138			189			134			134			122						210
					477						181			136			100			192		25-7-18 (S2) (30-5)	384			135
	5-7-18 (10-5)	156			258		23-8-18 (S2) (10-2)	207			158			91			111			881			273			173
		288			240			284												211			251			180
		217			209			136		5-7-18 (20-3)	255		6-7-18 (20-3)	853		4-7-18 (20-3)	165						303			182
		191			498			101			244			172			149		21-8-18 (S1) (30-3)	264			506			271
		216			385			201			279			285			148			198			238			238
		135			258			129			218			159			119			603			226			143
		245			160			130			372			185			86			246			328			163
		169			209			160			153			1039						267						177
					190			213			142			271		4-7-18 (20-4)	174			518		11-9-18 (30-1)	291			172
	17-7-18 (10-1)	421						206			264			241			209			1185			340			158
		159		6-7-18 (10-3)	186			229			175			186			226			328			373			162
		403			362			138			220			143			222			375			282			183
		280			311			143			383						180			372			371
		194			350			102					6-7-18 (20-4)	683			132			230			277		11-7-18 (S2_MM2) (30-4)	215
		374			326			154		5-7-18 (20-4)	333			380			103			306			272			161
		249			250						418			211			185			344			393			290
		270			188		23-8-18 (S2) (10-3)	306			176			155			139			637			309			153
		234						186						288			166			255			181			168
		252		6-7-18 (10-4)	273			199		5-7-18 (20-5)	269			392			128			718						226
					363			158			116			132			193			228		11-9-18 (30-2)	186			249
	17-7-18 (10-2)	241			387			141			219			133			185						279			216
		248			289			192			492						117		21-8-18 (S1) (30-4)	327			234			164
		163			254			122			469		6-7-18 (20-5)	156						291			727			238
		130			230			149			402			704		4-7-18 (20-5)	232			304			488			149
		189			192			224			143			572			170			425			150			169
		212			376			275			256			238			215			681			240			390
		198			259			318			586			578			130			256			419			152
		179			265			128			342			184			108			503			512			175
		223			193			149			487			164			100			406			370			144
		264						160			152			200			166			664			200
		320		6-7-18 (10-5)	266			132						188						147			515		11-7-18 (S2_MM2) (30-5)	444
		323			249			94		18-8-18 (20-1)	1376			388		26-7-18 (20-1)	319						237			516
					236			122			327			143			206		21-8-18 (S1) (30-5)	263			211			486
	17-7-18 (10-3)	297			164						279			189			178			576			121			225
		290			174		23-8-18 (S2) (10-4)	272			189			113			122			257			112			169
		339			229			218			232									217						159
		334			164			148			344		12-7-18 (20-1)	347		26-7-18 (20-2)	144			679		11-9-18 (30-3)	489			187
		346			192			175			288			274			158			1293			378			148
		226			350			176			145			342			192			210			564			151
		234			207			133			385			407			265			180			670			196
		229			167			329			275			496			158						287			183
		208			176			137			225			594			158		10-9-18 (30-1)	301			121			142
		131						120			529			346			131			1119			245			420
		136		25-7-18 (10-1)	290			127			306			258			143			835			349
		215			324			160			317			437			123			437			1093		12-7-18 (S2 11-7-18) (30-1)	190
		181			178			170			147			464			137			316			484			489
		126			437			114			128			244			160			885			128			155
		273			215			171						400						821			578			201
		232			145			71		18-8-18 (20-2)	207			171		26-7-18 (20-3)	189			193			157			297
					156			101			646			624			90			246			302			166
	17-7-18 (10-4)	313			174						297			209			151			254			184			244
		361			119		23-8-18 (S2) (10-5)	260			531			331			130			292			282			148
		205			145			197			391						178			152						170
		194			233			166			370		12-7-18 (20-2)	1049			95			312		11-9-18 (30-4)	266			123
		120			191			180			403			268			124			135			485			172
		158			327			352			161			819			162			226			161			179
		145			302			226			115			799						265			206			216
					197			259			257			205		26-7-18 (20-4)	135			310			192			200
	17-7-18 (10-5)	249			231			258			264			306			228			419			216			161
		257			302			196			315			406			193			312			182			148
		586			380			124			226			269			113						256			144
		261						225			397			175			132		10-9-18 (30-2)	374			509
		161		25-7-18 (10-2)	300			121			368						166			251			317		12-7-18 (S2 11-7-18) (30-2)	163
		200			477			158			241		12-7-18 (20-3)	440						124			260			235
		123			380			121			274			380		26-7-18 (20-5)	247			225			756			281
					191			137			165			864			132			312			922			190
	17-7-18 (10-7)	235			162			189						209			160			179			269			189
		622			159					18-8-18 (20-3)	466			121			119			284			163			169
		248			208		11-9-18 (10-1)	158			218			107			144			95			124			259
		334			161			142			381			189			132			172			202			272
		463			229						260			302						697						381
		316			342		11-9-18 (10-2)	90			273			297						191		11-9-18 (30-5)	196			180
		288			318			158			212			232						371			356			210
		534			375			83			324			524						218			119			237
		188			193			64			262			291						160			199			162
		187			277			97			185			198						339			198			174
		186			162						180			148						231			405			186
		123			168		11-9-18 (10-3)	117			204			210									436
		200			371			104			170			172					10-9-18 (30-3)	297			168
					197			98			201			217						231			297
	17-7-18 (10-8)	275			118			70			136			188						512			176
		401			141			72						141						184			139
		366		25-7-18 (10-3)				93		18-8-18 (20-4)	221									327			146
		274			264						207		12-7-18 (20-4)	185						399			639
		321			175		11-9-18 (10-4)	93			129			194						244			239
		159			257			95			712			241						124			199
		331			185			98			230			676						185			216
		358			397			106			199			308						231			183
					485			92			145			473						173			131
	18-7-18 (10-1)	250			195			144			251			563						169
		135			232						438			757
		156			211		11-9-18 (10-5)	98			218			177					10-9-18 (30-4)	289
		96			170			100			323			172						288
					242			113			263			165						266
	18-7-18 (10-2)	278			218			110			540			216						334
		99			150			117			229			217						363
		181			138						199									1334
					175						156		12-7-18 (20-5)	164						182
	18-7-18 (10-3)	161			146									746						300
		282								18-8-18 (20-5)	277			300						113
				25-7-18 (10-4)	310						240			915						124
	18-7-18 (10-4)	183			221						219			292						228
					481						183			233
	18-7-18 (10-5)	107			315						264			306
		157			261						215			156
					401						413
	18-7-18 (10-6)	108			209						208
		147			209						183
					390						187
					227						184
					209						156
					261						148
					276						289
					197						172
					367						128
											228
				25-7-18 (10-5)	232						147
					368						148
					217
					450					10-9-18 (20-1)	252
					436						546
					304						255
					247						223
					238						363
					703						214
					237						351
					226						370
					359						559
					267						249
					202						164
					254						178
					165						265
											177
											229
											261
											156
											668
											484
											372
											1026
											261
											111
										10-9-18 (20-2)	594
											254
											323
											214
											969
											395
											487
											1167
											1306
											331
											357
											243
											233
											256
											151
											145
											250
											177
										10-9-18 (20-3)	599
											283
											289
											181
											199
											217
											259
											379
											260
											791
											305
											930
											1238
											238
											623
											218
											189
											284
											389
											190
											1051
										10-9-18 (20-4)	236
											364
											554
											2171
											190
											196
											175
											1510
											211
											568
											624
											290
											231
											125
											140
											105
											148
											127
											168
										10-9-18 (20-5)	490
											284
											358
											102
											131
											447
											498
											210
											519
											240
											191
											173
											147
											452
											229
											279
											156
											426
											247
											401
											212
											139
											425
											234
											159
											147
											120
											131
											316
											178
