# Supplementary material for: Fibrinogen αC-subregions critically contribute blood clot fibre growth, mechanical stability, and resistance to fibrinolysis
Source: eLife. 2021 Oct 11;10:e68761. doi: 10.7554/eLife.68761 (PMC8553339; doi:10.7554/eLife.68761)
Supplement: Figure 4—figure supplement 1—source data 1. [file elife-68761-fig4-figsupp1-data1.xlsx]

## Sheet: Sheet1
WT	Experiment 1		Experiment 2		Experiment 3
	Front 1	Front 2	Front 1	Front 2	Front 1	Front 2
Clot 1	00:12:22	00:14:35	00:04:49	00:11:35	00:05:13	00:05:33
Clot 2	00:08:59	00:06:23	00:11:11
a390
	Experiment 1		Experiment 2		Experiment 3
	Front 1	Front 2	Front 1	Front 2	Front 1	Front 2
Clot 1	00:06:31	00:08:12	00:13:33	00:10:41	00:06:38	00:08:36
Clot 2			00:12:33
