# Supplementary material for: Fibrinogen αC-subregions critically contribute blood clot fibre growth, mechanical stability, and resistance to fibrinolysis
Source: eLife. 2021 Oct 11;10:e68761. doi: 10.7554/eLife.68761 (PMC8553339; doi:10.7554/eLife.68761)
Supplement: Figure 4—source data 1. [file elife-68761-fig4-data1.xlsx]

## Sheet: Sheet1
Figure 4 A
	WT														a390												a220													Figure 4 B	WT				a390				a220
Time (seconds)	Experiment 1			Experiment 2			Experiment 3			Experiment 4					Experiment 1			Experiment 2			Experiment 3			Experiment 4			Experiment 1		Experiment 2			Experiment 3			Experiment 4					Time from MaxOD to 50% lysis (mins)	Exp 1	Exp 2	Exp 3	Exp 4	Exp 1	Exp 2	Exp 3	Exp 4	Exp 1
3	0.483	0.573	0.579	0.476	0.491	0.593	0.565	0.638	0.698	0.647	0.538	0.563			0.64	0.479	0.78	0.33	0.309	0.321	0.674	0.75	0.735	0.428	0.337		0.559	0.481	0.448	0.495	0.572	0.64	0.465	0.528	0.432	0.559	0.495				78.8	71.6	66	72	64.2	59.8	59.8	64.2	24
15	0.482	0.57	0.576	0.476	0.492	0.592	0.56	0.631	0.697	0.651	0.542	0.564			0.627	0.478	0.75	0.329	0.308	0.319	0.673	0.75	0.729	0.409	0.335		0.577	0.511	0.455	0.503	0.563	0.641	0.468	0.533	0.435	0.562	0.494				71.2	80.4	74	85	82.6	69.2	63.4	95	17.2
27	0.481	0.569	0.574	0.476	0.492	0.59	0.559	0.62	0.682	0.646	0.546	0.561			0.631	0.476	0.74	0.329	0.308	0.32	0.673	0.749	0.726	0.397	0.333		0.587	0.532	0.459	0.517	0.565	0.639	0.466	0.535	0.44	0.568	0.498				67.2	71.2	63.4	81	34.4	73.6	77.8
39	0.48	0.566	0.573	0.476	0.491	0.589	0.558	0.617	0.677	0.645	0.551	0.561			0.625	0.475	0.724	0.328	0.307	0.318	0.674	0.747	0.723	0.386	0.333		0.579	0.546	0.458	0.532	0.559	0.636	0.474	0.539	0.446	0.573	0.505
51	0.48	0.566	0.572	0.477	0.492	0.588	0.557	0.613	0.672	0.652	0.554	0.563			0.613	0.474	0.703	0.328	0.307	0.318	0.672	0.747	0.717	0.383	0.332		0.565	0.558	0.46	0.547	0.548	0.636	0.476	0.543	0.451	0.577	0.511
63	0.479	0.565	0.571	0.476	0.491	0.587	0.556	0.607	0.669	0.647	0.558	0.56			0.613	0.473	0.699	0.329	0.306	0.318	0.674	0.746	0.718	0.379	0.331		0.557	0.566	0.456	0.559	0.551	0.634	0.473	0.545	0.457	0.582	0.517
75	0.479	0.563	0.571	0.476	0.491	0.587	0.553	0.606	0.671	0.649	0.558	0.56			0.609	0.473	0.691	0.326	0.306	0.316	0.674	0.747	0.717	0.374	0.331		0.547	0.572	0.458	0.567	0.546	0.631	0.475	0.546	0.462	0.584	0.524
87	0.478	0.562	0.568	0.476	0.49	0.586	0.554	0.601	0.662	0.649	0.562	0.559			0.599	0.472	0.676	0.326	0.305	0.316	0.673	0.747	0.713	0.372	0.329		0.534	0.579	0.457	0.573	0.539	0.633	0.475	0.548	0.465	0.587	0.528
99	0.479	0.561	0.569	0.476	0.49	0.585	0.553	0.602	0.658	0.651	0.565	0.559			0.596	0.47	0.67	0.326	0.305	0.316	0.673	0.745	0.713	0.368	0.329		0.528	0.584	0.456	0.578	0.539	0.63	0.48	0.549	0.467	0.589	0.531
111	0.478	0.56	0.568	0.475	0.49	0.585	0.552	0.601	0.656	0.657	0.567	0.56			0.587	0.471	0.658	0.326	0.304	0.315	0.671	0.746	0.709	0.367	0.329		0.517	0.589	0.454	0.58	0.529	0.631	0.477	0.55	0.471	0.591	0.536
123	0.478	0.56	0.566	0.476	0.49	0.585	0.551	0.599	0.654	0.653	0.57	0.558			0.586	0.469	0.657	0.326	0.304	0.315	0.673	0.745	0.711	0.363	0.329		0.514	0.593	0.453	0.583	0.534	0.627	0.483	0.55	0.475	0.593	0.539
135	0.477	0.558	0.566	0.475	0.489	0.585	0.549	0.599	0.661	0.661	0.571	0.56			0.582	0.469	0.652	0.325	0.304	0.314	0.673	0.746	0.71	0.363	0.328		0.508	0.597	0.453	0.583	0.531	0.627	0.482	0.55	0.475	0.594	0.54
147	0.477	0.558	0.565	0.475	0.489	0.585	0.55	0.595	0.65	0.655	0.575	0.558			0.574	0.469	0.643	0.325	0.303	0.314	0.673	0.745	0.71	0.361	0.328		0.502	0.6	0.452	0.585	0.523	0.629	0.483	0.55	0.478	0.595	0.544
159	0.477	0.557	0.565	0.475	0.488	0.584	0.549	0.596	0.653	0.655	0.575	0.558			0.57	0.468	0.636	0.325	0.303	0.314	0.672	0.744	0.71	0.358	0.328		0.498	0.603	0.451	0.585	0.528	0.626	0.49	0.55	0.481	0.595	0.546
171	0.477	0.557	0.565	0.474	0.488	0.583	0.55	0.595	0.649	0.657	0.577	0.558			0.563	0.467	0.626	0.325	0.303	0.314	0.671	0.745	0.704	0.358	0.328		0.489	0.606	0.451	0.584	0.519	0.628	0.484	0.551	0.483	0.595	0.548
183	0.476	0.556	0.564	0.475	0.488	0.584	0.549	0.594	0.648	0.655	0.58	0.558			0.564	0.467	0.625	0.323	0.303	0.313	0.672	0.744	0.709	0.355	0.327		0.489	0.608	0.451	0.585	0.525	0.625	0.487	0.55	0.483	0.596	0.548
195	0.477	0.555	0.564	0.475	0.488	0.584	0.547	0.595	0.654	0.664	0.58	0.56			0.554	0.466	0.612	0.324	0.302	0.313	0.673	0.745	0.707	0.355	0.327		0.483	0.61	0.452	0.584	0.523	0.624	0.488	0.549	0.484	0.596	0.549
207	0.476	0.555	0.562	0.474	0.488	0.584	0.55	0.592	0.647	0.655	0.583	0.557			0.555	0.465	0.612	0.323	0.302	0.313	0.672	0.744	0.706	0.353	0.327		0.483	0.612	0.452	0.583	0.513	0.626	0.486	0.551	0.485	0.596	0.551
219	0.476	0.554	0.563	0.475	0.487	0.584	0.549	0.593	0.647	0.66	0.583	0.559			0.552	0.465	0.607	0.322	0.302	0.312	0.673	0.744	0.707	0.351	0.327		0.481	0.614	0.453	0.583	0.52	0.624	0.489	0.55	0.486	0.596	0.55
231	0.476	0.554	0.562	0.475	0.487	0.584	0.549	0.593	0.644	0.656	0.584	0.557			0.545	0.465	0.596	0.322	0.301	0.312	0.671	0.745	0.702	0.351	0.327		0.474	0.614	0.451	0.582	0.516	0.625	0.49	0.55	0.485	0.595	0.55
243	0.476	0.553	0.563	0.475	0.487	0.584	0.549	0.591	0.646	0.656	0.586	0.558			0.545	0.464	0.596	0.323	0.301	0.312	0.673	0.744	0.706	0.348	0.326		0.476	0.615	0.45	0.581	0.517	0.622	0.492	0.549	0.485	0.596	0.55
255	0.476	0.552	0.563	0.475	0.487	0.584	0.547	0.593	0.652	0.665	0.586	0.56			0.542	0.464	0.59	0.322	0.301	0.311	0.672	0.745	0.705	0.349	0.326		0.473	0.617	0.451	0.582	0.517	0.621	0.491	0.548	0.485	0.595	0.551
267	0.476	0.552	0.561	0.475	0.488	0.584	0.549	0.59	0.645	0.656	0.589	0.558			0.538	0.463	0.583	0.321	0.3	0.311	0.672	0.744	0.705	0.347	0.326		0.471	0.617	0.449	0.581	0.506	0.623	0.494	0.548	0.483	0.592	0.549
279	0.476	0.552	0.562	0.474	0.487	0.584	0.547	0.592	0.646	0.657	0.586	0.558			0.538	0.462	0.582	0.321	0.3	0.311	0.673	0.744	0.707	0.346	0.326		0.471	0.617	0.449	0.581	0.512	0.621	0.498	0.546	0.481	0.591	0.548
291	0.476	0.551	0.562	0.474	0.487	0.584	0.549	0.592	0.641	0.657	0.588	0.558			0.535	0.463	0.575	0.321	0.3	0.31	0.671	0.745	0.701	0.346	0.326		0.468	0.618	0.449	0.58	0.508	0.623	0.495	0.547	0.478	0.589	0.545
303	0.476	0.551	0.561	0.475	0.487	0.584	0.549	0.591	0.643	0.658	0.591	0.558			0.531	0.462	0.57	0.32	0.3	0.31	0.673	0.744	0.704	0.344	0.326		0.468	0.618	0.448	0.579	0.508	0.619	0.5	0.544	0.477	0.589	0.545
315	0.476	0.55	0.561	0.474	0.487	0.583	0.547	0.592	0.648	0.662	0.589	0.56			0.534	0.461	0.569	0.32	0.299	0.31	0.673	0.745	0.703	0.344	0.326		0.468	0.617	0.447	0.578	0.505	0.619	0.5	0.543	0.474	0.588	0.543
327	0.476	0.55	0.561	0.474	0.487	0.584	0.548	0.589	0.643	0.655	0.591	0.558			0.526	0.461	0.561	0.32	0.3	0.31	0.673	0.746	0.704	0.342	0.326		0.465	0.618	0.448	0.577	0.496	0.618	0.502	0.537	0.472	0.585	0.541
339	0.475	0.55	0.56	0.474	0.487	0.583	0.547	0.593	0.645	0.661	0.589	0.56			0.526	0.461	0.56	0.32	0.299	0.31	0.673	0.745	0.704	0.342	0.326		0.467	0.617	0.447	0.576	0.503	0.617	0.503	0.535	0.468	0.583	0.54
351	0.475	0.549	0.559	0.474	0.487	0.584	0.548	0.592	0.638	0.652	0.591	0.558			0.526	0.46	0.556	0.319	0.299	0.309	0.672	0.747	0.701	0.341	0.325		0.465	0.618	0.446	0.573	0.5	0.619	0.501	0.534	0.463	0.58	0.538
363	0.475	0.549	0.559	0.474	0.487	0.583	0.549	0.593	0.64	0.652	0.591	0.558			0.522	0.46	0.55	0.318	0.299	0.309	0.674	0.745	0.704	0.34	0.326		0.462	0.617	0.446	0.572	0.501	0.615	0.502	0.53	0.459	0.578	0.533
375	0.475	0.549	0.56	0.473	0.486	0.582	0.546	0.592	0.644	0.655	0.592	0.56			0.523	0.46	0.55	0.319	0.299	0.309	0.673	0.747	0.701	0.34	0.326		0.464	0.615	0.444	0.571	0.498	0.613	0.5	0.527	0.454	0.575	0.531
387	0.475	0.548	0.56	0.473	0.487	0.583	0.548	0.589	0.639	0.646	0.596	0.558			0.518	0.46	0.544	0.318	0.298	0.309	0.674	0.747	0.704	0.339	0.326		0.463	0.616	0.444	0.568	0.49	0.615	0.501	0.526	0.448	0.571	0.527
399	0.475	0.548	0.558	0.473	0.487	0.583	0.546	0.591	0.641	0.648	0.593	0.56			0.517	0.459	0.541	0.318	0.299	0.309	0.674	0.748	0.704	0.338	0.326		0.463	0.614	0.443	0.567	0.495	0.612	0.504	0.524	0.443	0.568	0.525
411	0.475	0.548	0.559	0.473	0.487	0.583	0.547	0.591	0.632	0.642	0.594	0.558			0.515	0.459	0.539	0.318	0.298	0.308	0.672	0.748	0.7	0.338	0.326		0.463	0.614	0.442	0.565	0.494	0.612	0.498	0.522	0.436	0.566	0.52
423	0.475	0.548	0.559	0.473	0.487	0.582	0.547	0.591	0.633	0.64	0.594	0.558			0.512	0.459	0.533	0.317	0.299	0.308	0.674	0.747	0.703	0.336	0.327		0.46	0.613	0.442	0.563	0.487	0.609	0.496	0.52	0.43	0.561	0.517
435	0.475	0.548	0.559	0.473	0.487	0.582	0.546	0.593	0.636	0.642	0.595	0.559			0.513	0.458	0.533	0.317	0.298	0.308	0.674	0.748	0.701	0.337	0.326		0.462	0.609	0.44	0.562	0.489	0.607	0.489	0.518	0.425	0.558	0.513
447	0.475	0.547	0.56	0.473	0.487	0.583	0.547	0.589	0.633	0.637	0.596	0.558			0.51	0.459	0.528	0.317	0.298	0.308	0.675	0.748	0.703	0.335	0.326		0.459	0.61	0.439	0.558	0.48	0.608	0.483	0.515	0.42	0.553	0.511
459	0.474	0.548	0.557	0.473	0.487	0.582	0.546	0.592	0.638	0.643	0.594	0.56			0.512	0.459	0.528	0.316	0.298	0.308	0.675	0.749	0.703	0.335	0.326		0.461	0.606	0.439	0.556	0.485	0.604	0.48	0.513	0.415	0.55	0.508
471	0.474	0.547	0.559	0.473	0.487	0.582	0.547	0.589	0.63	0.633	0.598	0.558			0.511	0.459	0.526	0.316	0.298	0.307	0.673	0.75	0.7	0.335	0.326		0.46	0.606	0.437	0.553	0.483	0.604	0.473	0.511	0.409	0.545	0.504
483	0.474	0.547	0.557	0.473	0.487	0.582	0.547	0.592	0.631	0.64	0.594	0.56			0.509	0.459	0.522	0.316	0.298	0.307	0.675	0.747	0.704	0.334	0.327		0.458	0.604	0.436	0.552	0.474	0.6	0.469	0.509	0.405	0.54	0.502
495	0.474	0.547	0.558	0.473	0.486	0.582	0.547	0.592	0.63	0.632	0.604	0.558			0.509	0.458	0.521	0.316	0.297	0.307	0.673	0.749	0.698	0.334	0.327		0.459	0.598	0.437	0.549	0.479	0.596	0.461	0.506	0.397	0.538	0.499
507	0.474	0.546	0.558	0.472	0.487	0.582	0.546	0.591	0.629	0.634	0.599	0.559			0.51	0.459	0.519	0.316	0.297	0.307	0.675	0.748	0.702	0.334	0.327		0.457	0.598	0.436	0.546	0.471	0.598	0.457	0.505	0.393	0.531	0.497
519	0.473	0.547	0.557	0.472	0.486	0.582	0.545	0.592	0.634	0.628	0.597	0.558			0.51	0.459	0.518	0.315	0.298	0.307	0.675	0.75	0.702	0.333	0.327		0.458	0.596	0.436	0.543	0.477	0.594	0.454	0.503	0.387	0.526	0.493
531	0.474	0.546	0.558	0.472	0.487	0.581	0.546	0.589	0.627	0.628	0.6	0.558			0.507	0.459	0.516	0.315	0.297	0.306	0.674	0.751	0.701	0.332	0.327		0.457	0.592	0.438	0.542	0.473	0.593	0.442	0.502	0.384	0.521	0.491
543	0.474	0.547	0.558	0.471	0.487	0.581	0.546	0.591	0.628	0.632	0.601	0.56			0.503	0.459	0.511	0.315	0.298	0.307	0.675	0.75	0.702	0.332	0.328		0.454	0.589	0.436	0.539	0.463	0.59	0.434	0.5	0.377	0.517	0.487
555	0.473	0.546	0.558	0.471	0.486	0.58	0.546	0.592	0.626	0.625	0.603	0.558			0.505	0.458	0.512	0.315	0.297	0.307	0.673	0.75	0.699	0.331	0.328		0.455	0.583	0.436	0.538	0.47	0.588	0.421	0.498	0.374	0.514	0.485
567	0.474	0.546	0.559	0.471	0.486	0.581	0.545	0.59	0.624	0.631	0.6	0.559			0.503	0.458	0.509	0.314	0.297	0.306	0.675	0.75	0.701	0.331	0.328		0.455	0.58	0.437	0.534	0.466	0.587	0.415	0.497	0.37	0.51	0.483
579	0.472	0.546	0.556	0.471	0.487	0.581	0.544	0.592	0.63	0.624	0.603	0.558			0.504	0.458	0.51	0.315	0.297	0.307	0.675	0.751	0.7	0.331	0.328		0.455	0.575	0.439	0.532	0.468	0.583	0.41	0.496	0.365	0.507	0.48
591	0.473	0.545	0.557	0.471	0.486	0.58	0.545	0.588	0.62	0.623	0.601	0.558			0.503	0.458	0.507	0.314	0.297	0.306	0.675	0.751	0.701	0.33	0.328		0.454	0.572	0.438	0.529	0.465	0.584	0.401	0.495	0.361	0.503	0.477
603	0.473	0.546	0.556	0.471	0.487	0.58	0.545	0.591	0.628	0.621	0.602	0.557			0.498	0.458	0.503	0.313	0.297	0.306	0.676	0.751	0.701	0.331	0.328		0.451	0.567	0.438	0.527	0.456	0.58	0.394	0.494	0.357	0.5	0.473
615	0.472	0.545	0.557	0.471	0.486	0.58	0.545	0.589	0.62	0.62	0.603	0.558			0.5	0.458	0.504	0.314	0.297	0.306	0.673	0.751	0.697	0.33	0.328		0.453	0.56	0.437	0.525	0.461	0.579	0.387	0.492	0.354	0.497	0.471
627	0.472	0.545	0.557	0.47	0.486	0.579	0.545	0.589	0.619	0.624	0.601	0.559			0.5	0.458	0.502	0.313	0.297	0.305	0.676	0.75	0.701	0.329	0.329		0.449	0.557	0.438	0.521	0.46	0.579	0.382	0.49	0.349	0.492	0.468
639	0.472	0.545	0.555	0.47	0.486	0.579	0.543	0.589	0.627	0.619	0.604	0.558			0.499	0.458	0.502	0.313	0.297	0.305	0.675	0.752	0.699	0.329	0.328		0.45	0.551	0.437	0.517	0.457	0.575	0.378	0.489	0.346	0.489	0.465
651	0.471	0.544	0.556	0.47	0.486	0.578	0.544	0.588	0.619	0.618	0.599	0.558			0.498	0.458	0.5	0.313	0.297	0.305	0.675	0.751	0.701	0.328	0.329		0.448	0.547	0.436	0.516	0.456	0.574	0.373	0.487	0.342	0.484	0.463
663	0.471	0.545	0.556	0.469	0.487	0.579	0.543	0.591	0.623	0.618	0.601	0.558			0.495	0.458	0.497	0.312	0.297	0.305	0.676	0.751	0.701	0.329	0.329		0.446	0.541	0.436	0.512	0.449	0.569	0.37	0.485	0.339	0.481	0.46
675	0.47	0.544	0.555	0.469	0.486	0.578	0.544	0.59	0.617	0.617	0.6	0.557			0.497	0.458	0.498	0.312	0.297	0.305	0.674	0.751	0.698	0.328	0.329		0.446	0.534	0.434	0.51	0.453	0.567	0.365	0.484	0.336	0.476	0.457
687	0.471	0.544	0.556	0.469	0.486	0.578	0.544	0.591	0.616	0.621	0.599	0.559			0.496	0.458	0.496	0.312	0.297	0.305	0.676	0.75	0.701	0.328	0.329		0.443	0.531	0.432	0.508	0.452	0.566	0.362	0.483	0.33	0.472	0.452
699	0.47	0.544	0.553	0.469	0.485	0.578	0.542	0.59	0.622	0.614	0.603	0.558			0.495	0.458	0.496	0.312	0.297	0.305	0.674	0.753	0.699	0.328	0.329		0.443	0.526	0.43	0.506	0.451	0.563	0.36	0.479	0.33	0.467	0.451
711	0.47	0.543	0.555	0.468	0.485	0.577	0.543	0.587	0.617	0.613	0.599	0.557			0.494	0.458	0.494	0.312	0.296	0.305	0.676	0.752	0.701	0.327	0.33		0.442	0.522	0.428	0.505	0.449	0.562	0.357	0.478	0.327	0.463	0.448
723	0.469	0.544	0.554	0.469	0.485	0.578	0.543	0.59	0.62	0.62	0.598	0.559			0.492	0.458	0.492	0.311	0.296	0.305	0.676	0.752	0.701	0.327	0.33		0.439	0.517	0.428	0.501	0.441	0.56	0.354	0.476	0.323	0.46	0.444
735	0.469	0.544	0.554	0.467	0.484	0.578	0.543	0.588	0.613	0.612	0.604	0.557			0.493	0.457	0.492	0.311	0.296	0.305	0.674	0.751	0.696	0.326	0.329		0.44	0.51	0.424	0.499	0.446	0.557	0.35	0.473	0.32	0.457	0.441
747	0.47	0.543	0.554	0.467	0.485	0.577	0.543	0.591	0.614	0.611	0.601	0.557			0.491	0.458	0.491	0.311	0.296	0.305	0.676	0.749	0.701	0.325	0.329		0.437	0.507	0.423	0.495	0.443	0.555	0.346	0.47	0.316	0.453	0.436
759	0.469	0.544	0.553	0.468	0.485	0.577	0.541	0.589	0.615	0.615	0.599	0.559			0.492	0.458	0.49	0.311	0.296	0.305	0.675	0.752	0.699	0.326	0.33		0.437	0.503	0.421	0.492	0.437	0.553	0.341	0.468	0.313	0.447	0.432
771	0.469	0.543	0.553	0.467	0.484	0.576	0.541	0.588	0.609	0.609	0.599	0.557			0.491	0.458	0.489	0.31	0.296	0.305	0.676	0.751	0.701	0.325	0.33		0.436	0.498	0.419	0.49	0.438	0.554	0.339	0.464	0.311	0.447	0.429
783	0.469	0.543	0.554	0.467	0.485	0.576	0.541	0.588	0.614	0.613	0.595	0.559			0.49	0.458	0.488	0.31	0.296	0.304	0.675	0.752	0.7	0.325	0.33		0.433	0.493	0.418	0.484	0.431	0.548	0.333	0.462	0.308	0.441	0.425
795	0.468	0.543	0.552	0.466	0.484	0.576	0.542	0.588	0.61	0.606	0.598	0.557			0.49	0.457	0.488	0.31	0.297	0.304	0.673	0.751	0.697	0.325	0.33		0.433	0.489	0.415	0.48	0.437	0.548	0.329	0.46	0.306	0.436	0.421
807	0.468	0.542	0.552	0.466	0.484	0.576	0.541	0.588	0.608	0.608	0.598	0.557			0.489	0.458	0.487	0.31	0.296	0.304	0.675	0.75	0.7	0.324	0.33		0.432	0.486	0.414	0.475	0.435	0.544	0.323	0.458	0.304	0.434	0.417
819	0.467	0.543	0.552	0.465	0.484	0.576	0.54	0.59	0.613	0.606	0.595	0.556			0.488	0.458	0.486	0.31	0.296	0.305	0.675	0.751	0.698	0.324	0.33		0.43	0.482	0.412	0.472	0.423	0.544	0.32	0.456	0.299	0.43	0.412
831	0.468	0.542	0.552	0.465	0.483	0.575	0.541	0.586	0.608	0.605	0.596	0.556			0.488	0.457	0.485	0.31	0.296	0.305	0.675	0.75	0.7	0.323	0.331		0.429	0.477	0.407	0.471	0.431	0.542	0.315	0.453	0.299	0.426	0.41
843	0.468	0.542	0.553	0.465	0.484	0.575	0.54	0.588	0.609	0.61	0.593	0.559			0.486	0.458	0.484	0.31	0.295	0.304	0.676	0.752	0.7	0.324	0.331		0.427	0.476	0.405	0.464	0.423	0.539	0.309	0.449	0.297	0.423	0.406
855	0.467	0.542	0.55	0.464	0.483	0.575	0.541	0.586	0.606	0.604	0.596	0.556			0.487	0.457	0.484	0.31	0.296	0.304	0.673	0.752	0.696	0.323	0.33		0.427	0.473	0.401	0.462	0.428	0.535	0.305	0.447	0.293	0.419	0.401
867	0.467	0.541	0.551	0.464	0.483	0.575	0.539	0.589	0.604	0.609	0.592	0.558			0.486	0.457	0.483	0.309	0.296	0.304	0.675	0.749	0.701	0.323	0.331		0.426	0.469	0.397	0.455	0.425	0.534	0.297	0.444	0.292	0.414	0.399
879	0.467	0.541	0.55	0.464	0.484	0.575	0.539	0.587	0.61	0.603	0.595	0.556			0.484	0.457	0.481	0.308	0.295	0.304	0.673	0.751	0.697	0.323	0.331		0.423	0.465	0.396	0.45	0.415	0.531	0.293	0.441	0.289	0.411	0.393
891	0.467	0.541	0.551	0.463	0.483	0.574	0.54	0.585	0.606	0.605	0.591	0.557			0.485	0.457	0.482	0.308	0.295	0.304	0.675	0.751	0.699	0.322	0.331		0.423	0.461	0.389	0.449	0.419	0.529	0.289	0.44	0.286	0.406	0.389
903	0.467	0.541	0.551	0.464	0.483	0.574	0.539	0.589	0.606	0.602	0.591	0.556			0.484	0.457	0.481	0.307	0.295	0.303	0.675	0.751	0.7	0.322	0.331		0.422	0.46	0.385	0.44	0.418	0.526	0.284	0.437	0.285	0.401	0.387
915	0.467	0.541	0.549	0.463	0.482	0.575	0.539	0.587	0.601	0.601	0.59	0.556			0.484	0.457	0.481	0.306	0.296	0.303	0.673	0.751	0.697	0.322	0.331		0.422	0.457	0.381	0.436	0.418	0.526	0.279	0.434	0.282	0.398	0.383
927	0.466	0.541	0.55	0.463	0.481	0.573	0.539	0.588	0.601	0.606	0.589	0.558			0.483	0.457	0.48	0.307	0.295	0.303	0.675	0.748	0.7	0.322	0.331		0.42	0.453	0.377	0.432	0.413	0.523	0.273	0.433	0.278	0.395	0.378
939	0.466	0.541	0.548	0.463	0.482	0.574	0.539	0.585	0.605	0.601	0.592	0.556			0.482	0.457	0.479	0.306	0.295	0.303	0.673	0.751	0.696	0.322	0.332		0.418	0.453	0.376	0.427	0.403	0.521	0.27	0.428	0.276	0.391	0.375
951	0.466	0.54	0.55	0.462	0.481	0.573	0.539	0.585	0.6	0.602	0.589	0.557			0.482	0.456	0.479	0.307	0.295	0.304	0.674	0.749	0.699	0.321	0.331		0.418	0.448	0.37	0.425	0.407	0.519	0.264	0.427	0.273	0.387	0.372
963	0.466	0.54	0.549	0.462	0.482	0.573	0.537	0.587	0.606	0.598	0.589	0.555			0.481	0.457	0.478	0.305	0.295	0.302	0.674	0.75	0.699	0.321	0.331		0.415	0.447	0.368	0.416	0.402	0.517	0.261	0.424	0.272	0.384	0.368
975	0.465	0.54	0.546	0.462	0.481	0.573	0.539	0.584	0.6	0.598	0.588	0.555			0.481	0.456	0.478	0.305	0.295	0.303	0.673	0.751	0.697	0.321	0.331		0.416	0.444	0.364	0.411	0.403	0.514	0.258	0.423	0.268	0.38	0.363
987	0.466	0.54	0.548	0.46	0.481	0.572	0.538	0.587	0.598	0.602	0.586	0.557			0.481	0.457	0.478	0.305	0.295	0.303	0.673	0.749	0.697	0.32	0.331		0.415	0.444	0.361	0.405	0.4	0.512	0.252	0.42	0.264	0.377	0.357
999	0.466	0.54	0.548	0.46	0.481	0.573	0.538	0.587	0.597	0.596	0.588	0.555			0.48	0.457	0.476	0.304	0.295	0.303	0.672	0.75	0.696	0.32	0.332		0.412	0.44	0.359	0.4	0.392	0.509	0.248	0.418	0.259	0.372	0.352
1011	0.466	0.539	0.548	0.461	0.48	0.572	0.537	0.586	0.595	0.602	0.587	0.557			0.48	0.456	0.477	0.304	0.295	0.302	0.674	0.749	0.698	0.32	0.332		0.413	0.438	0.353	0.396	0.395	0.505	0.246	0.414	0.256	0.369	0.347
1023	0.466	0.539	0.547	0.46	0.48	0.572	0.535	0.586	0.601	0.596	0.588	0.555			0.479	0.457	0.476	0.304	0.295	0.302	0.673	0.749	0.697	0.32	0.332		0.409	0.435	0.35	0.387	0.394	0.503	0.242	0.413	0.253	0.365	0.343
1035	0.466	0.538	0.545	0.46	0.48	0.572	0.536	0.584	0.594	0.594	0.586	0.555			0.478	0.456	0.475	0.303	0.295	0.302	0.674	0.749	0.698	0.32	0.332		0.41	0.433	0.347	0.381	0.391	0.5	0.239	0.41	0.249	0.361	0.339
1047	0.466	0.538	0.547	0.458	0.48	0.571	0.536	0.587	0.598	0.598	0.584	0.555			0.478	0.457	0.475	0.302	0.295	0.302	0.673	0.749	0.698	0.32	0.332		0.409	0.431	0.345	0.379	0.387	0.498	0.236	0.409	0.245	0.357	0.336
1059	0.466	0.538	0.546	0.459	0.479	0.571	0.537	0.584	0.594	0.593	0.586	0.554			0.477	0.456	0.474	0.302	0.295	0.302	0.672	0.749	0.693	0.319	0.332		0.406	0.428	0.341	0.369	0.38	0.494	0.235	0.407	0.243	0.354	0.333
1071	0.466	0.538	0.546	0.459	0.479	0.571	0.536	0.586	0.593	0.599	0.584	0.556			0.478	0.456	0.475	0.302	0.295	0.302	0.674	0.747	0.698	0.319	0.332		0.405	0.426	0.337	0.367	0.382	0.492	0.23	0.405	0.238	0.349	0.327
1083	0.466	0.538	0.546	0.458	0.479	0.571	0.535	0.585	0.6	0.593	0.584	0.554			0.476	0.456	0.474	0.302	0.295	0.302	0.672	0.748	0.694	0.318	0.333		0.405	0.422	0.334	0.36	0.381	0.489	0.227	0.403	0.233	0.345	0.319
1095	0.465	0.538	0.544	0.458	0.479	0.57	0.535	0.584	0.592	0.595	0.583	0.555			0.476	0.456	0.473	0.301	0.295	0.302	0.673	0.748	0.697	0.318	0.333		0.403	0.419	0.332	0.356	0.377	0.486	0.225	0.399	0.231	0.342	0.319
1107	0.465	0.538	0.545	0.457	0.478	0.57	0.535	0.585	0.594	0.592	0.584	0.554			0.477	0.455	0.474	0.301	0.294	0.302	0.672	0.749	0.697	0.318	0.332		0.402	0.417	0.328	0.353	0.375	0.485	0.221	0.396	0.228	0.338	0.315
1119	0.466	0.537	0.546	0.457	0.478	0.57	0.535	0.585	0.591	0.591	0.583	0.554			0.474	0.455	0.472	0.3	0.294	0.302	0.671	0.747	0.692	0.318	0.332		0.4	0.414	0.326	0.343	0.369	0.481	0.22	0.393	0.226	0.334	0.312
1131	0.465	0.537	0.545	0.457	0.478	0.57	0.535	0.584	0.593	0.591	0.582	0.553			0.474	0.455	0.472	0.301	0.294	0.302	0.672	0.746	0.696	0.318	0.332		0.401	0.41	0.321	0.343	0.371	0.477	0.217	0.391	0.224	0.331	0.308
1143	0.465	0.536	0.545	0.455	0.477	0.569	0.534	0.585	0.597	0.59	0.582	0.553			0.474	0.456	0.472	0.3	0.295	0.301	0.671	0.747	0.694	0.318	0.332		0.399	0.409	0.317	0.336	0.367	0.473	0.217	0.389	0.219	0.327	0.301
1155	0.465	0.536	0.543	0.456	0.478	0.569	0.535	0.584	0.59	0.596	0.579	0.556			0.474	0.455	0.472	0.299	0.295	0.302	0.672	0.748	0.697	0.318	0.333		0.397	0.408	0.315	0.332	0.364	0.469	0.213	0.386	0.215	0.323	0.295
1167	0.465	0.536	0.543	0.455	0.476	0.568	0.533	0.583	0.593	0.589	0.582	0.553			0.473	0.455	0.47	0.299	0.294	0.301	0.671	0.748	0.694	0.317	0.332		0.396	0.404	0.309	0.332	0.361	0.465	0.21	0.382	0.214	0.318	0.294
1179	0.465	0.536	0.542	0.455	0.476	0.568	0.535	0.583	0.589	0.591	0.58	0.554			0.471	0.455	0.469	0.299	0.294	0.301	0.67	0.747	0.691	0.317	0.332		0.393	0.402	0.307	0.326	0.353	0.46	0.209	0.38	0.211	0.315	0.29
1191	0.464	0.535	0.543	0.454	0.475	0.568	0.533	0.582	0.587	0.588	0.582	0.553			0.472	0.453	0.47	0.299	0.295	0.301	0.671	0.745	0.693	0.317	0.332		0.394	0.4	0.302	0.326	0.358	0.457	0.206	0.376	0.208	0.312	0.285
1203	0.465	0.535	0.544	0.453	0.475	0.568	0.532	0.582	0.591	0.588	0.582	0.553			0.471	0.454	0.469	0.298	0.294	0.3	0.67	0.747	0.691	0.317	0.333		0.393	0.397	0.299	0.319	0.355	0.453	0.207	0.373	0.206	0.307	0.279
1215	0.464	0.535	0.541	0.453	0.475	0.568	0.533	0.58	0.588	0.594	0.579	0.555			0.472	0.454	0.469	0.298	0.295	0.301	0.67	0.746	0.694	0.317	0.333		0.393	0.395	0.294	0.317	0.348	0.446	0.205	0.368	0.203	0.302	0.276
1227	0.465	0.535	0.543	0.453	0.474	0.567	0.532	0.582	0.591	0.587	0.58	0.553			0.472	0.454	0.469	0.297	0.294	0.301	0.67	0.747	0.694	0.316	0.333		0.393	0.394	0.289	0.319	0.35	0.443	0.203	0.366	0.201	0.298	0.27
1239	0.464	0.534	0.54	0.452	0.475	0.566	0.533	0.581	0.586	0.59	0.577	0.554			0.47	0.454	0.467	0.298	0.294	0.301	0.669	0.745	0.69	0.316	0.333		0.389	0.391	0.287	0.313	0.341	0.44	0.201	0.364	0.198	0.294	0.266
1251	0.465	0.534	0.541	0.452	0.474	0.567	0.532	0.582	0.585	0.586	0.577	0.552			0.47	0.452	0.468	0.297	0.295	0.301	0.67	0.744	0.693	0.316	0.332		0.39	0.387	0.279	0.311	0.344	0.438	0.199	0.36	0.195	0.29	0.262
1263	0.464	0.534	0.541	0.452	0.473	0.566	0.532	0.581	0.587	0.584	0.579	0.552			0.469	0.454	0.467	0.296	0.294	0.3	0.669	0.746	0.69	0.315	0.332		0.387	0.385	0.274	0.306	0.342	0.434	0.2	0.358	0.193	0.285	0.258
1275	0.463	0.533	0.539	0.451	0.474	0.566	0.532	0.58	0.585	0.59	0.576	0.554			0.47	0.453	0.468	0.296	0.295	0.3	0.671	0.744	0.694	0.315	0.333		0.386	0.382	0.271	0.303	0.33	0.431	0.197	0.354	0.19	0.282	0.253
1287	0.463	0.533	0.54	0.45	0.472	0.565	0.53	0.58	0.589	0.584	0.577	0.551			0.47	0.453	0.467	0.297	0.294	0.301	0.669	0.746	0.692	0.315	0.332		0.383	0.378	0.264	0.305	0.335	0.428	0.197	0.352	0.188	0.277	0.248
1299	0.463	0.533	0.539	0.45	0.472	0.565	0.531	0.579	0.584	0.586	0.575	0.552			0.468	0.453	0.466	0.296	0.294	0.3	0.668	0.745	0.69	0.315	0.332		0.38	0.377	0.261	0.298	0.333	0.426	0.193	0.35	0.185	0.273	0.243
1311	0.463	0.533	0.54	0.449	0.472	0.565	0.531	0.58	0.586	0.586	0.576	0.553			0.469	0.452	0.467	0.296	0.295	0.301	0.669	0.744	0.691	0.315	0.332		0.38	0.373	0.255	0.296	0.332	0.424	0.193	0.348	0.184	0.268	0.24
1323	0.463	0.532	0.539	0.449	0.472	0.565	0.531	0.58	0.581	0.583	0.576	0.551			0.468	0.453	0.466	0.295	0.295	0.3	0.666	0.744	0.687	0.314	0.332		0.376	0.37	0.251	0.294	0.332	0.42	0.193	0.344	0.181	0.264	0.234
1335	0.462	0.532	0.536	0.448	0.471	0.564	0.53	0.58	0.583	0.588	0.574	0.554			0.468	0.452	0.466	0.294	0.294	0.3	0.668	0.743	0.69	0.314	0.333		0.376	0.37	0.249	0.291	0.321	0.416	0.19	0.338	0.178	0.258	0.229
1347	0.463	0.532	0.538	0.448	0.471	0.564	0.529	0.579	0.588	0.582	0.574	0.551			0.467	0.452	0.466	0.294	0.295	0.3	0.667	0.744	0.688	0.314	0.332		0.374	0.364	0.244	0.292	0.324	0.411	0.192	0.336	0.176	0.255	0.224
1359	0.463	0.532	0.537	0.447	0.47	0.564	0.53	0.578	0.581	0.582	0.575	0.551			0.467	0.452	0.465	0.295	0.295	0.301	0.668	0.743	0.69	0.314	0.332		0.37	0.363	0.239	0.287	0.322	0.409	0.188	0.334	0.174	0.248	0.22
1371	0.462	0.531	0.537	0.447	0.469	0.563	0.529	0.578	0.584	0.585	0.572	0.553			0.467	0.45	0.465	0.294	0.295	0.3	0.668	0.743	0.69	0.314	0.332		0.37	0.359	0.236	0.284	0.319	0.403	0.189	0.33	0.171	0.245	0.216
1383	0.462	0.531	0.536	0.447	0.469	0.563	0.53	0.577	0.579	0.581	0.574	0.551			0.466	0.451	0.464	0.293	0.295	0.299	0.666	0.743	0.686	0.313	0.332		0.369	0.356	0.232	0.284	0.316	0.399	0.186	0.329	0.169	0.239	0.211
1395	0.462	0.53	0.534	0.446	0.469	0.563	0.529	0.578	0.579	0.584	0.572	0.552			0.466	0.451	0.464	0.292	0.294	0.299	0.667	0.741	0.689	0.313	0.332		0.367	0.355	0.229	0.28	0.308	0.396	0.185	0.326	0.166	0.235	0.205
1407	0.463	0.53	0.536	0.445	0.468	0.562	0.527	0.577	0.583	0.579	0.574	0.55			0.466	0.451	0.464	0.293	0.295	0.3	0.666	0.742	0.686	0.313	0.332		0.366	0.351	0.226	0.28	0.311	0.387	0.187	0.322	0.164	0.23	0.202
1419	0.462	0.53	0.534	0.445	0.469	0.562	0.528	0.575	0.58	0.583	0.571	0.552			0.465	0.45	0.463	0.292	0.294	0.299	0.667	0.741	0.69	0.313	0.332		0.361	0.348	0.222	0.276	0.309	0.385	0.184	0.32	0.161	0.226	0.197
1431	0.462	0.53	0.534	0.445	0.467	0.562	0.527	0.576	0.582	0.577	0.572	0.549			0.466	0.45	0.464	0.292	0.295	0.299	0.667	0.741	0.688	0.313	0.332		0.36	0.347	0.218	0.272	0.306	0.378	0.183	0.318	0.158	0.222	0.192
1443	0.462	0.529	0.534	0.445	0.467	0.562	0.527	0.575	0.577	0.582	0.571	0.552			0.464	0.45	0.463	0.292	0.294	0.299	0.664	0.741	0.684	0.312	0.332		0.359	0.343	0.215	0.273	0.303	0.371	0.182	0.314	0.157	0.218	0.188
1455	0.462	0.529	0.534	0.444	0.467	0.561	0.526	0.576	0.577	0.577	0.572	0.55			0.465	0.45	0.463	0.292	0.295	0.299	0.666	0.739	0.688	0.313	0.332		0.358	0.338	0.212	0.27	0.294	0.363	0.181	0.311	0.155	0.214	0.185
1467	0.461	0.528	0.533	0.443	0.467	0.56	0.527	0.575	0.575	0.578	0.57	0.55			0.464	0.45	0.463	0.291	0.295	0.299	0.664	0.74	0.683	0.312	0.332		0.356	0.335	0.208	0.27	0.3	0.359	0.178	0.31	0.152	0.208	0.182
1479	0.461	0.528	0.533	0.443	0.466	0.56	0.526	0.574	0.576	0.576	0.57	0.549			0.463	0.449	0.462	0.291	0.295	0.298	0.665	0.74	0.686	0.312	0.332		0.351	0.333	0.206	0.264	0.296	0.355	0.178	0.307	0.15	0.203	0.178
1491	0.461	0.528	0.533	0.442	0.465	0.56	0.525	0.575	0.579	0.576	0.569	0.549			0.464	0.449	0.462	0.291	0.295	0.299	0.665	0.739	0.686	0.311	0.332		0.353	0.328	0.204	0.263	0.285	0.348	0.181	0.305	0.148	0.201	0.174
1503	0.46	0.528	0.532	0.442	0.465	0.56	0.525	0.573	0.575	0.579	0.568	0.551			0.462	0.449	0.461	0.291	0.295	0.298	0.665	0.739	0.686	0.312	0.332		0.348	0.325	0.201	0.266	0.288	0.341	0.177	0.3	0.146	0.195	0.171
1515	0.46	0.527	0.53	0.442	0.465	0.56	0.524	0.574	0.573	0.575	0.571	0.549			0.463	0.448	0.462	0.29	0.294	0.298	0.665	0.738	0.687	0.311	0.332		0.349	0.323	0.197	0.259	0.283	0.337	0.177	0.299	0.145	0.192	0.168
1527	0.46	0.527	0.53	0.441	0.463	0.559	0.525	0.573	0.572	0.579	0.567	0.551			0.462	0.449	0.461	0.289	0.295	0.298	0.663	0.738	0.683	0.311	0.331		0.347	0.319	0.196	0.259	0.287	0.332	0.175	0.297	0.144	0.188	0.166
1539	0.461	0.527	0.531	0.44	0.463	0.559	0.524	0.572	0.573	0.574	0.568	0.549			0.463	0.448	0.461	0.29	0.294	0.298	0.664	0.736	0.685	0.311	0.332		0.344	0.313	0.193	0.256	0.284	0.326	0.174	0.294	0.141	0.186	0.163
1551	0.46	0.526	0.53	0.441	0.462	0.559	0.523	0.573	0.576	0.577	0.566	0.55			0.463	0.448	0.461	0.289	0.294	0.298	0.664	0.738	0.685	0.311	0.332		0.341	0.313	0.191	0.256	0.274	0.321	0.172	0.291	0.139	0.182	0.159
1563	0.459	0.526	0.528	0.439	0.461	0.558	0.523	0.571	0.571	0.573	0.568	0.548			0.461	0.448	0.46	0.29	0.294	0.298	0.663	0.737	0.683	0.311	0.332		0.336	0.31	0.186	0.257	0.28	0.317	0.172	0.288	0.138	0.178	0.157
1575	0.46	0.526	0.529	0.439	0.462	0.558	0.523	0.572	0.572	0.574	0.567	0.549			0.462	0.446	0.461	0.289	0.294	0.297	0.664	0.736	0.685	0.31	0.332		0.336	0.306	0.186	0.254	0.271	0.313	0.174	0.287	0.136	0.176	0.155
1587	0.46	0.525	0.53	0.438	0.46	0.557	0.523	0.571	0.57	0.572	0.566	0.548			0.46	0.447	0.459	0.289	0.295	0.297	0.661	0.736	0.68	0.31	0.332		0.332	0.299	0.182	0.251	0.275	0.309	0.171	0.284	0.135	0.173	0.152
1599	0.458	0.525	0.526	0.438	0.461	0.557	0.522	0.572	0.57	0.572	0.566	0.548			0.461	0.447	0.46	0.288	0.294	0.296	0.663	0.735	0.684	0.31	0.332		0.332	0.298	0.179	0.249	0.27	0.305	0.171	0.282	0.133	0.169	0.15
1611	0.459	0.524	0.527	0.438	0.46	0.557	0.521	0.57	0.575	0.573	0.564	0.549			0.46	0.447	0.459	0.288	0.295	0.297	0.662	0.735	0.682	0.31	0.331		0.329	0.293	0.179	0.248	0.262	0.303	0.168	0.282	0.132	0.167	0.148
1623	0.459	0.525	0.526	0.437	0.459	0.557	0.521	0.569	0.569	0.572	0.568	0.548			0.46	0.447	0.459	0.288	0.294	0.297	0.664	0.735	0.685	0.31	0.332		0.327	0.29	0.175	0.25	0.267	0.3	0.169	0.278	0.13	0.163	0.145
1635	0.459	0.524	0.527	0.437	0.46	0.556	0.52	0.569	0.571	0.574	0.563	0.55			0.46	0.446	0.459	0.287	0.293	0.296	0.662	0.734	0.683	0.309	0.332		0.325	0.286	0.173	0.246	0.258	0.294	0.169	0.277	0.129	0.161	0.145
1647	0.458	0.524	0.526	0.437	0.458	0.556	0.521	0.568	0.566	0.569	0.566	0.547			0.46	0.447	0.459	0.287	0.294	0.296	0.661	0.734	0.679	0.309	0.331		0.318	0.282	0.171	0.248	0.263	0.291	0.167	0.274	0.128	0.159	0.143
1659	0.458	0.524	0.524	0.435	0.458	0.555	0.52	0.569	0.565	0.569	0.562	0.547			0.459	0.446	0.458	0.286	0.293	0.295	0.661	0.732	0.682	0.308	0.331		0.321	0.28	0.17	0.244	0.26	0.285	0.167	0.271	0.127	0.156	0.142
1671	0.458	0.523	0.525	0.436	0.458	0.555	0.52	0.569	0.569	0.571	0.563	0.548			0.459	0.446	0.458	0.287	0.294	0.296	0.66	0.733	0.679	0.309	0.331		0.319	0.276	0.169	0.245	0.254	0.284	0.165	0.271	0.126	0.153	0.14
1683	0.458	0.523	0.524	0.434	0.457	0.555	0.52	0.566	0.566	0.569	0.564	0.547			0.458	0.446	0.457	0.286	0.293	0.296	0.661	0.732	0.681	0.308	0.331		0.314	0.271	0.166	0.244	0.256	0.281	0.164	0.27	0.125	0.151	0.139
1695	0.457	0.523	0.524	0.434	0.457	0.554	0.518	0.567	0.57	0.571	0.562	0.548			0.459	0.445	0.458	0.285	0.293	0.295	0.66	0.732	0.681	0.309	0.331		0.313	0.272	0.166	0.241	0.249	0.274	0.165	0.266	0.124	0.148	0.137
1707	0.457	0.522	0.523	0.434	0.456	0.554	0.519	0.566	0.563	0.568	0.563	0.547			0.457	0.445	0.457	0.285	0.293	0.295	0.66	0.732	0.68	0.308	0.331		0.31	0.268	0.163	0.243	0.252	0.272	0.162	0.264	0.125	0.146	0.136
1719	0.457	0.522	0.522	0.433	0.456	0.554	0.518	0.566	0.564	0.571	0.561	0.549			0.458	0.445	0.457	0.286	0.292	0.295	0.66	0.73	0.681	0.308	0.331		0.309	0.262	0.163	0.239	0.25	0.266	0.164	0.261	0.123	0.143	0.136
1731	0.457	0.522	0.522	0.433	0.454	0.553	0.517	0.565	0.564	0.566	0.563	0.546			0.458	0.445	0.457	0.285	0.293	0.295	0.658	0.732	0.677	0.307	0.331		0.307	0.264	0.162	0.237	0.249	0.263	0.161	0.26	0.121	0.142	0.135
1743	0.456	0.522	0.522	0.433	0.455	0.553	0.518	0.565	0.563	0.571	0.561	0.549			0.457	0.445	0.457	0.286	0.292	0.296	0.66	0.729	0.68	0.308	0.33		0.302	0.26	0.16	0.238	0.245	0.26	0.16	0.258	0.119	0.14	0.133
1755	0.457	0.521	0.522	0.432	0.455	0.553	0.516	0.565	0.567	0.565	0.563	0.546			0.457	0.444	0.457	0.285	0.292	0.295	0.659	0.73	0.678	0.308	0.331		0.302	0.257	0.159	0.239	0.238	0.255	0.161	0.256	0.119	0.139	0.133
1767	0.457	0.52	0.522	0.432	0.454	0.552	0.517	0.563	0.561	0.571	0.561	0.549			0.457	0.445	0.456	0.284	0.293	0.294	0.659	0.729	0.679	0.307	0.331		0.298	0.254	0.157	0.238	0.242	0.255	0.159	0.255	0.118	0.137	0.133
1779	0.456	0.521	0.519	0.431	0.454	0.552	0.517	0.564	0.563	0.565	0.561	0.546			0.457	0.444	0.456	0.284	0.292	0.294	0.659	0.729	0.679	0.307	0.331		0.299	0.252	0.155	0.232	0.238	0.251	0.16	0.254	0.118	0.135	0.131
1791	0.456	0.52	0.521	0.431	0.453	0.552	0.516	0.563	0.559	0.569	0.56	0.548			0.457	0.444	0.456	0.283	0.293	0.294	0.658	0.728	0.677	0.307	0.331		0.296	0.247	0.154	0.232	0.233	0.248	0.158	0.252	0.117	0.134	0.13
1803	0.455	0.52	0.519	0.431	0.453	0.551	0.516	0.562	0.56	0.565	0.56	0.546			0.455	0.444	0.455	0.283	0.292	0.294	0.658	0.727	0.678	0.306	0.331		0.292	0.243	0.153	0.233	0.234	0.245	0.157	0.251	0.116	0.132	0.129
1815	0.456	0.52	0.519	0.43	0.453	0.551	0.515	0.562	0.562	0.567	0.559	0.548			0.456	0.443	0.456	0.283	0.291	0.293	0.657	0.728	0.676	0.306	0.331		0.292	0.243	0.152	0.228	0.226	0.239	0.158	0.248	0.116	0.132	0.129
1827	0.455	0.519	0.519	0.43	0.452	0.551	0.515	0.561	0.558	0.564	0.561	0.546			0.455	0.444	0.454	0.283	0.293	0.293	0.659	0.726	0.679	0.306	0.331		0.289	0.239	0.149	0.227	0.232	0.238	0.155	0.246	0.116	0.131	0.129
1839	0.454	0.519	0.517	0.43	0.452	0.551	0.514	0.562	0.561	0.567	0.558	0.548			0.455	0.443	0.455	0.283	0.291	0.294	0.658	0.726	0.678	0.306	0.33		0.288	0.238	0.147	0.224	0.23	0.234	0.156	0.245	0.115	0.131	0.128
1851	0.455	0.519	0.517	0.429	0.451	0.55	0.515	0.561	0.558	0.562	0.561	0.545			0.456	0.443	0.455	0.283	0.292	0.294	0.656	0.726	0.674	0.306	0.33		0.283	0.234	0.148	0.223	0.221	0.233	0.154	0.244	0.114	0.129	0.127
1863	0.455	0.519	0.516	0.429	0.451	0.551	0.514	0.56	0.555	0.563	0.558	0.546			0.455	0.443	0.455	0.282	0.291	0.293	0.658	0.724	0.678	0.306	0.331		0.281	0.231	0.145	0.224	0.226	0.229	0.153	0.243	0.113	0.128	0.127
1875	0.455	0.518	0.517	0.428	0.45	0.55	0.513	0.559	0.56	0.564	0.557	0.547			0.455	0.442	0.455	0.282	0.291	0.292	0.656	0.725	0.674	0.306	0.33		0.281	0.227	0.144	0.218	0.223	0.223	0.152	0.239	0.113	0.126	0.127
1887	0.454	0.518	0.516	0.428	0.45	0.55	0.514	0.558	0.557	0.562	0.559	0.546			0.453	0.443	0.454	0.282	0.292	0.293	0.656	0.724	0.675	0.305	0.332		0.278	0.226	0.143	0.217	0.223	0.223	0.152	0.239	0.113	0.126	0.126
1899	0.454	0.518	0.515	0.427	0.449	0.549	0.513	0.559	0.558	0.564	0.556	0.547			0.454	0.442	0.454	0.282	0.291	0.292	0.655	0.724	0.675	0.305	0.33		0.279	0.224	0.141	0.215	0.22	0.22	0.152	0.238	0.113	0.125	0.126
1911	0.454	0.517	0.516	0.427	0.45	0.549	0.512	0.559	0.553	0.561	0.558	0.545			0.454	0.442	0.454	0.282	0.291	0.293	0.655	0.724	0.674	0.305	0.33		0.273	0.219	0.142	0.214	0.213	0.217	0.151	0.237	0.112	0.125	0.126
1923	0.453	0.517	0.513	0.427	0.449	0.549	0.512	0.558	0.553	0.559	0.556	0.545			0.453	0.442	0.453	0.281	0.29	0.292	0.656	0.722	0.675	0.305	0.33		0.269	0.217	0.14	0.215	0.217	0.213	0.151	0.234	0.112	0.124	0.126
1935	0.453	0.517	0.515	0.426	0.449	0.548	0.511	0.559	0.555	0.561	0.556	0.545			0.453	0.441	0.453	0.281	0.29	0.292	0.655	0.722	0.674	0.304	0.33		0.271	0.214	0.141	0.212	0.213	0.212	0.152	0.234	0.112	0.124	0.126
1947	0.453	0.517	0.514	0.426	0.447	0.548	0.512	0.557	0.552	0.559	0.557	0.545			0.452	0.442	0.453	0.28	0.292	0.291	0.655	0.722	0.674	0.304	0.33		0.265	0.213	0.146	0.212	0.214	0.21	0.15	0.232	0.111	0.124	0.125
1959	0.453	0.516	0.513	0.425	0.447	0.548	0.511	0.557	0.558	0.563	0.557	0.547			0.453	0.441	0.453	0.281	0.29	0.291	0.655	0.723	0.674	0.304	0.33		0.266	0.21	0.15	0.21	0.212	0.206	0.149	0.231	0.111	0.123	0.124
1971	0.453	0.516	0.513	0.424	0.447	0.547	0.511	0.555	0.551	0.558	0.557	0.545			0.453	0.441	0.453	0.281	0.29	0.291	0.654	0.721	0.673	0.304	0.33		0.264	0.208	0.148	0.208	0.205	0.206	0.146	0.23	0.111	0.123	0.125
1983	0.452	0.516	0.512	0.424	0.447	0.547	0.511	0.557	0.553	0.561	0.554	0.546			0.452	0.441	0.452	0.28	0.29	0.291	0.654	0.72	0.673	0.304	0.33		0.258	0.204	0.142	0.211	0.208	0.203	0.147	0.229	0.111	0.123	0.125
1995	0.453	0.516	0.512	0.424	0.447	0.546	0.51	0.556	0.547	0.557	0.556	0.544			0.451	0.44	0.452	0.28	0.29	0.29	0.653	0.72	0.67	0.304	0.33		0.26	0.203	0.138	0.205	0.204	0.199	0.146	0.227	0.111	0.122	0.124
2007	0.452	0.515	0.512	0.424	0.446	0.546	0.51	0.556	0.55	0.559	0.554	0.545			0.451	0.44	0.452	0.28	0.291	0.29	0.654	0.719	0.672	0.304	0.33		0.255	0.198	0.134	0.202	0.207	0.198	0.145	0.225	0.111	0.122	0.125
2019	0.452	0.514	0.51	0.424	0.446	0.546	0.509	0.555	0.554	0.557	0.554	0.544			0.451	0.44	0.452	0.279	0.29	0.29	0.653	0.719	0.67	0.303	0.33		0.254	0.198	0.133	0.2	0.205	0.196	0.146	0.225	0.111	0.122	0.124
2031	0.452	0.514	0.512	0.423	0.445	0.545	0.51	0.553	0.55	0.555	0.554	0.544			0.451	0.44	0.451	0.279	0.29	0.289	0.653	0.719	0.671	0.303	0.33		0.253	0.193	0.132	0.197	0.198	0.194	0.144	0.223	0.111	0.122	0.124
2043	0.451	0.514	0.51	0.423	0.445	0.546	0.509	0.554	0.552	0.556	0.554	0.544			0.45	0.44	0.451	0.279	0.289	0.29	0.652	0.718	0.67	0.303	0.33		0.248	0.193	0.131	0.198	0.201	0.192	0.145	0.222	0.112	0.122	0.125
2055	0.451	0.514	0.509	0.422	0.445	0.545	0.509	0.554	0.548	0.554	0.554	0.543			0.45	0.439	0.451	0.279	0.289	0.289	0.651	0.718	0.667	0.303	0.329		0.248	0.19	0.13	0.193	0.197	0.189	0.142	0.221	0.11	0.122	0.124
2067	0.451	0.513	0.51	0.422	0.444	0.545	0.509	0.553	0.548	0.558	0.552	0.546			0.449	0.439	0.45	0.279	0.291	0.29	0.653	0.716	0.67	0.303	0.329		0.244	0.187	0.129	0.192	0.199	0.188	0.142	0.22	0.11	0.122	0.125
2079	0.451	0.513	0.509	0.422	0.444	0.544	0.508	0.553	0.548	0.553	0.554	0.543			0.45	0.439	0.45	0.279	0.289	0.289	0.651	0.716	0.667	0.302	0.329		0.241	0.186	0.128	0.188	0.198	0.184	0.141	0.218	0.112	0.121	0.123
2091	0.451	0.513	0.509	0.421	0.444	0.544	0.508	0.55	0.546	0.555	0.551	0.544			0.449	0.438	0.45	0.278	0.29	0.288	0.653	0.716	0.67	0.302	0.329		0.24	0.181	0.129	0.184	0.192	0.184	0.14	0.217	0.11	0.122	0.124
2103	0.45	0.513	0.507	0.421	0.443	0.544	0.507	0.553	0.55	0.553	0.552	0.543			0.449	0.439	0.45	0.278	0.288	0.288	0.652	0.716	0.669	0.302	0.329		0.237	0.182	0.126	0.185	0.196	0.181	0.141	0.216	0.11	0.121	0.124
2115	0.45	0.513	0.508	0.421	0.444	0.543	0.508	0.55	0.545	0.552	0.553	0.542			0.449	0.439	0.45	0.279	0.289	0.288	0.651	0.716	0.667	0.302	0.329		0.235	0.18	0.127	0.181	0.19	0.18	0.14	0.215	0.109	0.121	0.124
2127	0.449	0.512	0.506	0.42	0.443	0.543	0.508	0.55	0.546	0.555	0.551	0.545			0.448	0.438	0.449	0.278	0.29	0.287	0.651	0.714	0.668	0.301	0.329		0.231	0.175	0.125	0.177	0.195	0.178	0.139	0.214	0.11	0.122	0.124
2139	0.45	0.512	0.508	0.42	0.443	0.543	0.507	0.55	0.543	0.551	0.552	0.543			0.448	0.437	0.449	0.278	0.288	0.287	0.65	0.715	0.665	0.301	0.329		0.229	0.175	0.126	0.174	0.193	0.177	0.138	0.213	0.11	0.121	0.123
2151	0.449	0.512	0.506	0.419	0.443	0.542	0.506	0.549	0.542	0.553	0.549	0.544			0.448	0.437	0.449	0.278	0.289	0.288	0.652	0.714	0.668	0.302	0.328		0.227	0.172	0.125	0.17	0.185	0.175	0.137	0.211	0.112	0.121	0.124
2163	0.449	0.512	0.506	0.419	0.442	0.542	0.506	0.549	0.547	0.55	0.55	0.542			0.448	0.437	0.449	0.277	0.288	0.287	0.65	0.714	0.666	0.301	0.329		0.228	0.172	0.124	0.169	0.19	0.174	0.139	0.211	0.111	0.121	0.124
2175	0.449	0.511	0.506	0.418	0.442	0.541	0.507	0.548	0.543	0.55	0.551	0.542			0.448	0.437	0.449	0.277	0.288	0.287	0.65	0.713	0.665	0.3	0.329		0.225	0.169	0.123	0.164	0.186	0.171	0.137	0.209	0.11	0.121	0.123
2187	0.449	0.511	0.506	0.418	0.442	0.541	0.505	0.548	0.542	0.553	0.55	0.544			0.447	0.437	0.448	0.277	0.289	0.287	0.651	0.713	0.666	0.301	0.328		0.223	0.166	0.123	0.161	0.189	0.17	0.137	0.209	0.11	0.121	0.124
2199	0.449	0.511	0.505	0.418	0.441	0.541	0.506	0.548	0.541	0.549	0.551	0.542			0.447	0.436	0.449	0.277	0.288	0.286	0.649	0.713	0.663	0.301	0.328		0.222	0.165	0.123	0.156	0.186	0.169	0.136	0.208	0.11	0.121	0.123
2211	0.449	0.511	0.505	0.417	0.442	0.54	0.506	0.549	0.541	0.552	0.549	0.544			0.446	0.437	0.448	0.277	0.287	0.286	0.65	0.712	0.664	0.3	0.328		0.22	0.164	0.123	0.155	0.181	0.165	0.135	0.205	0.11	0.121	0.123
2223	0.448	0.51	0.503	0.416	0.441	0.54	0.505	0.547	0.545	0.548	0.549	0.542			0.447	0.436	0.448	0.277	0.287	0.286	0.649	0.712	0.663	0.3	0.329		0.219	0.163	0.122	0.154	0.185	0.166	0.135	0.206	0.11	0.121	0.124
2235	0.448	0.51	0.504	0.417	0.441	0.539	0.504	0.546	0.539	0.547	0.548	0.542			0.446	0.436	0.448	0.277	0.287	0.286	0.65	0.711	0.664	0.3	0.328		0.218	0.16	0.123	0.15	0.182	0.163	0.134	0.204	0.11	0.12	0.123
2247	0.448	0.51	0.504	0.416	0.44	0.539	0.505	0.547	0.543	0.549	0.548	0.543			0.445	0.435	0.447	0.276	0.288	0.286	0.649	0.712	0.663	0.3	0.328		0.215	0.156	0.121	0.148	0.184	0.162	0.134	0.205	0.11	0.12	0.123
2259	0.447	0.51	0.504	0.416	0.44	0.539	0.505	0.546	0.539	0.547	0.549	0.541			0.446	0.435	0.447	0.276	0.287	0.286	0.648	0.71	0.66	0.299	0.328		0.214	0.158	0.121	0.147	0.182	0.16	0.133	0.203	0.11	0.121	0.124
2271	0.447	0.51	0.503	0.415	0.439	0.538	0.504	0.547	0.537	0.548	0.547	0.543			0.445	0.436	0.446	0.276	0.287	0.286	0.649	0.709	0.662	0.299	0.328		0.211	0.155	0.12	0.144	0.177	0.159	0.133	0.202	0.11	0.121	0.124
2283	0.446	0.509	0.502	0.415	0.44	0.538	0.504	0.545	0.539	0.545	0.548	0.541			0.445	0.435	0.447	0.276	0.286	0.285	0.647	0.71	0.659	0.299	0.328		0.208	0.154	0.12	0.144	0.181	0.158	0.134	0.202	0.11	0.121	0.123
2295	0.447	0.509	0.502	0.415	0.44	0.537	0.503	0.544	0.537	0.548	0.548	0.543			0.445	0.435	0.447	0.276	0.287	0.285	0.648	0.709	0.661	0.299	0.328		0.207	0.152	0.12	0.142	0.178	0.156	0.133	0.2	0.11	0.12	0.123
2307	0.446	0.509	0.501	0.414	0.439	0.537	0.503	0.544	0.541	0.545	0.548	0.541			0.444	0.434	0.446	0.275	0.288	0.285	0.648	0.71	0.66	0.299	0.328		0.206	0.15	0.119	0.14	0.18	0.156	0.132	0.2	0.111	0.12	0.124
2319	0.446	0.509	0.502	0.415	0.439	0.537	0.502	0.543	0.536	0.547	0.546	0.543			0.444	0.434	0.446	0.275	0.287	0.285	0.649	0.709	0.66	0.299	0.327		0.204	0.149	0.119	0.139	0.178	0.154	0.131	0.199	0.11	0.12	0.123
2331	0.446	0.509	0.501	0.414	0.439	0.536	0.502	0.543	0.537	0.543	0.547	0.541			0.443	0.434	0.445	0.275	0.287	0.284	0.648	0.708	0.659	0.299	0.327		0.201	0.146	0.119	0.138	0.174	0.153	0.131	0.198	0.11	0.12	0.123
2343	0.446	0.509	0.5	0.413	0.438	0.537	0.503	0.543	0.535	0.543	0.546	0.541			0.443	0.433	0.445	0.275	0.286	0.284	0.646	0.708	0.655	0.298	0.327		0.201	0.146	0.119	0.138	0.177	0.152	0.132	0.197	0.11	0.119	0.123
2355	0.446	0.508	0.5	0.413	0.438	0.535	0.503	0.543	0.534	0.542	0.545	0.54			0.443	0.433	0.445	0.275	0.286	0.284	0.648	0.707	0.658	0.298	0.327		0.198	0.144	0.118	0.135	0.173	0.149	0.13	0.195	0.111	0.119	0.123
2367	0.446	0.508	0.5	0.413	0.438	0.534	0.502	0.543	0.538	0.542	0.545	0.54			0.443	0.433	0.445	0.274	0.287	0.283	0.647	0.707	0.656	0.298	0.327		0.198	0.144	0.118	0.135	0.175	0.149	0.131	0.196	0.11	0.119	0.123
2379	0.445	0.508	0.5	0.412	0.437	0.535	0.503	0.542	0.534	0.544	0.545	0.542			0.443	0.433	0.446	0.274	0.286	0.283	0.647	0.707	0.657	0.298	0.327		0.196	0.143	0.118	0.133	0.174	0.149	0.13	0.195	0.11	0.12	0.123
2391	0.445	0.507	0.499	0.412	0.438	0.534	0.502	0.542	0.536	0.541	0.545	0.54			0.442	0.433	0.445	0.274	0.286	0.284	0.647	0.707	0.656	0.297	0.327		0.192	0.142	0.118	0.132	0.171	0.147	0.13	0.194	0.11	0.12	0.123
2403	0.445	0.507	0.499	0.412	0.437	0.534	0.502	0.542	0.533	0.543	0.545	0.542			0.442	0.432	0.444	0.274	0.286	0.283	0.646	0.706	0.654	0.297	0.327		0.192	0.14	0.118	0.132	0.172	0.146	0.131	0.194	0.11	0.119	0.123
2415	0.445	0.508	0.499	0.411	0.437	0.532	0.501	0.54	0.532	0.54	0.546	0.54			0.442	0.432	0.445	0.274	0.285	0.283	0.647	0.705	0.655	0.297	0.327		0.19	0.138	0.118	0.131	0.171	0.146	0.129	0.193	0.11	0.12	0.123
2427	0.444	0.507	0.498	0.411	0.436	0.532	0.501	0.541	0.536	0.541	0.543	0.542			0.441	0.431	0.444	0.273	0.286	0.282	0.646	0.706	0.653	0.297	0.326		0.188	0.136	0.118	0.13	0.172	0.145	0.13	0.192	0.11	0.119	0.122
2439	0.444	0.507	0.498	0.411	0.436	0.532	0.5	0.538	0.53	0.539	0.545	0.54			0.442	0.431	0.443	0.273	0.286	0.282	0.647	0.705	0.653	0.297	0.327		0.186	0.138	0.118	0.129	0.171	0.143	0.129	0.191	0.11	0.12	0.123
2451	0.444	0.507	0.498	0.41	0.435	0.531	0.5	0.539	0.534	0.541	0.543	0.542			0.441	0.432	0.443	0.273	0.286	0.283	0.646	0.706	0.652	0.296	0.326		0.186	0.137	0.117	0.128	0.169	0.142	0.128	0.19	0.11	0.119	0.123
2463	0.444	0.507	0.498	0.41	0.435	0.532	0.5	0.539	0.53	0.538	0.545	0.54			0.441	0.431	0.443	0.273	0.285	0.282	0.646	0.705	0.651	0.297	0.327		0.185	0.136	0.117	0.128	0.17	0.141	0.129	0.19	0.11	0.119	0.122
2475	0.444	0.507	0.498	0.409	0.435	0.53	0.5	0.539	0.53	0.539	0.543	0.541			0.44	0.43	0.443	0.273	0.285	0.282	0.646	0.704	0.651	0.296	0.326		0.183	0.134	0.117	0.127	0.169	0.14	0.128	0.188	0.11	0.12	0.123
2487	0.444	0.506	0.496	0.409	0.434	0.53	0.5	0.539	0.534	0.536	0.543	0.539			0.44	0.43	0.442	0.272	0.286	0.281	0.645	0.704	0.649	0.296	0.326		0.181	0.134	0.117	0.126	0.172	0.14	0.128	0.188	0.11	0.12	0.124
2499	0.444	0.506	0.496	0.409	0.434	0.531	0.499	0.537	0.53	0.536	0.543	0.54			0.44	0.43	0.442	0.272	0.285	0.282	0.646	0.704	0.65	0.296	0.326		0.178	0.134	0.117	0.126	0.171	0.139	0.128	0.187	0.11	0.119	0.124
2511	0.443	0.506	0.496	0.409	0.434	0.529	0.499	0.537	0.531	0.537	0.542	0.54			0.439	0.429	0.441	0.272	0.285	0.281	0.646	0.704	0.65	0.296	0.325		0.178	0.132	0.117	0.126	0.166	0.138	0.127	0.187	0.11	0.12	0.123
2523	0.443	0.506	0.496	0.408	0.433	0.529	0.499	0.537	0.527	0.534	0.542	0.539			0.439	0.43	0.442	0.272	0.285	0.281	0.645	0.703	0.647	0.296	0.326		0.175	0.133	0.117	0.126	0.171	0.136	0.127	0.185	0.11	0.119	0.123
2535	0.443	0.506	0.496	0.408	0.432	0.527	0.499	0.537	0.528	0.536	0.542	0.541			0.439	0.429	0.441	0.272	0.285	0.281	0.645	0.703	0.648	0.295	0.325		0.175	0.131	0.116	0.125	0.169	0.137	0.128	0.185	0.11	0.119	0.123
2547	0.442	0.505	0.495	0.407	0.432	0.527	0.497	0.536	0.53	0.534	0.543	0.539			0.439	0.429	0.441	0.271	0.286	0.281	0.644	0.703	0.647	0.295	0.326		0.173	0.131	0.117	0.124	0.17	0.135	0.128	0.184	0.11	0.119	0.123
2559	0.443	0.505	0.495	0.407	0.431	0.527	0.498	0.536	0.527	0.535	0.542	0.54			0.439	0.428	0.441	0.271	0.284	0.28	0.645	0.702	0.646	0.296	0.325		0.171	0.132	0.116	0.125	0.17	0.134	0.127	0.183	0.111	0.119	0.123
2571	0.442	0.505	0.495	0.407	0.432	0.526	0.498	0.535	0.53	0.532	0.544	0.538			0.438	0.428	0.44	0.271	0.284	0.28	0.645	0.703	0.645	0.295	0.326		0.17	0.129	0.116	0.125	0.166	0.134	0.128	0.184	0.11	0.119	0.122
2583	0.442	0.505	0.493	0.407	0.431	0.526	0.497	0.535	0.526	0.532	0.541	0.539			0.438	0.427	0.44	0.27	0.284	0.28	0.643	0.703	0.643	0.295	0.325		0.169	0.129	0.116	0.124	0.168	0.133	0.127	0.183	0.111	0.119	0.123
2595	0.442	0.504	0.494	0.406	0.431	0.524	0.496	0.536	0.526	0.531	0.541	0.538			0.438	0.427	0.44	0.27	0.284	0.28	0.644	0.702	0.644	0.295	0.325		0.167	0.129	0.116	0.125	0.165	0.132	0.127	0.181	0.11	0.119	0.122
2607	0.441	0.504	0.493	0.406	0.431	0.524	0.497	0.535	0.526	0.53	0.541	0.538			0.436	0.427	0.438	0.27	0.285	0.279	0.643	0.701	0.641	0.294	0.324		0.166	0.129	0.117	0.123	0.168	0.132	0.128	0.181	0.11	0.119	0.122
2619	0.442	0.504	0.493	0.405	0.43	0.525	0.496	0.534	0.524	0.53	0.541	0.537			0.437	0.427	0.439	0.27	0.284	0.28	0.645	0.701	0.643	0.294	0.325		0.163	0.128	0.116	0.124	0.167	0.131	0.127	0.181	0.111	0.119	0.123
2631	0.441	0.504	0.494	0.405	0.43	0.522	0.496	0.535	0.529	0.529	0.541	0.538			0.436	0.427	0.438	0.269	0.284	0.279	0.644	0.701	0.641	0.294	0.325		0.164	0.128	0.116	0.124	0.162	0.131	0.127	0.181	0.11	0.119	0.123
2643	0.441	0.504	0.493	0.405	0.429	0.523	0.495	0.533	0.523	0.53	0.54	0.54			0.436	0.427	0.438	0.269	0.283	0.279	0.643	0.7	0.64	0.294	0.325		0.163	0.127	0.116	0.124	0.165	0.13	0.127	0.18	0.11	0.118	0.122
2655	0.441	0.504	0.492	0.404	0.429	0.521	0.495	0.533	0.524	0.528	0.54	0.537			0.436	0.426	0.438	0.269	0.283	0.28	0.644	0.7	0.64	0.294	0.324		0.162	0.127	0.116	0.123	0.163	0.13	0.127	0.178	0.11	0.118	0.122
2667	0.441	0.503	0.492	0.404	0.429	0.52	0.494	0.532	0.521	0.528	0.54	0.538			0.435	0.426	0.438	0.268	0.284	0.278	0.643	0.701	0.638	0.294	0.325		0.16	0.127	0.116	0.123	0.164	0.129	0.127	0.178	0.111	0.119	0.122
2679	0.441	0.503	0.492	0.403	0.428	0.521	0.494	0.534	0.523	0.526	0.541	0.537			0.435	0.425	0.437	0.268	0.283	0.279	0.643	0.699	0.638	0.294	0.324		0.159	0.126	0.116	0.123	0.163	0.128	0.127	0.177	0.111	0.118	0.123
2691	0.44	0.503	0.491	0.404	0.429	0.519	0.494	0.533	0.526	0.526	0.538	0.536			0.435	0.425	0.437	0.268	0.283	0.279	0.642	0.7	0.636	0.293	0.325		0.157	0.126	0.116	0.124	0.16	0.128	0.126	0.177	0.11	0.119	0.122
2703	0.44	0.502	0.49	0.403	0.428	0.519	0.493	0.532	0.521	0.525	0.539	0.536			0.435	0.425	0.436	0.267	0.282	0.278	0.643	0.7	0.637	0.293	0.324		0.157	0.125	0.116	0.123	0.162	0.127	0.127	0.176	0.11	0.118	0.123
2715	0.44	0.503	0.491	0.403	0.428	0.517	0.492	0.532	0.523	0.525	0.539	0.536			0.435	0.424	0.436	0.267	0.282	0.278	0.643	0.699	0.636	0.293	0.324		0.156	0.125	0.116	0.122	0.161	0.127	0.126	0.175	0.11	0.118	0.122
2727	0.44	0.502	0.49	0.403	0.428	0.516	0.492	0.532	0.52	0.524	0.538	0.537			0.434	0.424	0.436	0.267	0.283	0.278	0.641	0.699	0.633	0.293	0.324		0.154	0.125	0.117	0.123	0.162	0.126	0.127	0.175	0.11	0.118	0.121
2739	0.44	0.501	0.489	0.402	0.427	0.518	0.492	0.532	0.52	0.523	0.539	0.535			0.434	0.424	0.436	0.267	0.282	0.278	0.641	0.698	0.633	0.293	0.324		0.153	0.125	0.116	0.123	0.161	0.126	0.127	0.175	0.111	0.118	0.122
2751	0.44	0.502	0.489	0.401	0.427	0.515	0.492	0.532	0.522	0.523	0.538	0.538			0.433	0.424	0.435	0.266	0.282	0.278	0.641	0.698	0.632	0.293	0.324		0.153	0.125	0.116	0.123	0.157	0.126	0.127	0.173	0.111	0.118	0.122
2763	0.439	0.501	0.488	0.401	0.427	0.516	0.491	0.53	0.519	0.521	0.539	0.535			0.434	0.423	0.435	0.265	0.281	0.277	0.641	0.697	0.631	0.293	0.324		0.152	0.124	0.116	0.123	0.159	0.124	0.127	0.172	0.111	0.119	0.122
2775	0.44	0.501	0.489	0.4	0.426	0.513	0.491	0.531	0.521	0.522	0.538	0.537			0.433	0.422	0.434	0.266	0.281	0.277	0.641	0.698	0.631	0.292	0.324		0.151	0.124	0.116	0.122	0.159	0.124	0.126	0.172	0.11	0.119	0.122
2787	0.439	0.501	0.488	0.4	0.426	0.513	0.489	0.53	0.517	0.519	0.539	0.534			0.433	0.422	0.434	0.265	0.282	0.277	0.639	0.697	0.629	0.292	0.325		0.15	0.124	0.116	0.122	0.159	0.125	0.127	0.172	0.11	0.117	0.122
2799	0.439	0.5	0.487	0.4	0.426	0.514	0.489	0.53	0.518	0.52	0.536	0.535			0.433	0.421	0.433	0.265	0.281	0.277	0.64	0.697	0.629	0.292	0.325		0.149	0.124	0.116	0.122	0.159	0.124	0.126	0.171	0.11	0.118	0.122
2811	0.439	0.5	0.487	0.4	0.426	0.511	0.489	0.529	0.52	0.518	0.537	0.534			0.432	0.421	0.433	0.264	0.28	0.277	0.639	0.697	0.628	0.292	0.324		0.148	0.124	0.117	0.123	0.156	0.123	0.126	0.17	0.11	0.118	0.122
2823	0.439	0.499	0.486	0.4	0.425	0.511	0.488	0.528	0.516	0.517	0.538	0.534			0.432	0.421	0.433	0.264	0.28	0.277	0.639	0.696	0.628	0.292	0.324		0.146	0.123	0.117	0.123	0.159	0.123	0.126	0.17	0.11	0.118	0.122
2835	0.439	0.499	0.486	0.399	0.425	0.509	0.488	0.529	0.519	0.518	0.536	0.536			0.432	0.42	0.432	0.264	0.28	0.277	0.638	0.696	0.626	0.291	0.324		0.147	0.123	0.116	0.123	0.158	0.124	0.126	0.169	0.11	0.117	0.122
2847	0.439	0.499	0.485	0.399	0.425	0.508	0.487	0.529	0.516	0.516	0.537	0.533			0.432	0.42	0.431	0.263	0.281	0.276	0.638	0.696	0.625	0.292	0.324		0.145	0.124	0.116	0.122	0.157	0.123	0.127	0.168	0.11	0.118	0.122
2859	0.439	0.498	0.485	0.399	0.425	0.51	0.486	0.529	0.514	0.516	0.535	0.534			0.431	0.42	0.431	0.263	0.279	0.276	0.639	0.695	0.626	0.291	0.324		0.146	0.123	0.116	0.122	0.158	0.122	0.126	0.167	0.11	0.118	0.122
2871	0.439	0.498	0.484	0.398	0.425	0.507	0.485	0.529	0.513	0.514	0.535	0.532			0.43	0.419	0.431	0.262	0.279	0.277	0.637	0.695	0.624	0.291	0.324		0.144	0.122	0.116	0.122	0.153	0.122	0.126	0.167	0.111	0.118	0.122
2883	0.438	0.498	0.484	0.398	0.424	0.507	0.485	0.527	0.514	0.513	0.537	0.533			0.431	0.419	0.43	0.261	0.279	0.276	0.636	0.695	0.623	0.291	0.324		0.144	0.122	0.116	0.124	0.156	0.121	0.126	0.166	0.111	0.118	0.122
2895	0.438	0.497	0.482	0.397	0.424	0.504	0.485	0.528	0.516	0.514	0.535	0.535			0.43	0.418	0.429	0.262	0.279	0.276	0.636	0.695	0.622	0.291	0.324		0.143	0.123	0.116	0.123	0.156	0.122	0.126	0.165	0.11	0.118	0.122
2907	0.438	0.497	0.483	0.396	0.423	0.503	0.483	0.527	0.512	0.512	0.536	0.531			0.43	0.418	0.429	0.261	0.28	0.276	0.636	0.695	0.621	0.29	0.324		0.142	0.122	0.116	0.123	0.157	0.121	0.127	0.165	0.111	0.118	0.123
2919	0.438	0.496	0.481	0.396	0.423	0.505	0.483	0.528	0.513	0.512	0.534	0.531			0.429	0.417	0.429	0.26	0.278	0.275	0.634	0.694	0.62	0.29	0.324		0.142	0.122	0.116	0.122	0.154	0.121	0.126	0.165	0.11	0.118	0.122
2931	0.438	0.496	0.481	0.396	0.424	0.502	0.482	0.527	0.512	0.511	0.534	0.531			0.429	0.417	0.428	0.26	0.278	0.275	0.634	0.694	0.618	0.29	0.323		0.14	0.121	0.117	0.122	0.151	0.12	0.126	0.163	0.11	0.118	0.122
2943	0.437	0.495	0.48	0.396	0.423	0.501	0.481	0.527	0.51	0.51	0.535	0.53			0.429	0.417	0.427	0.259	0.278	0.275	0.633	0.693	0.618	0.29	0.323		0.141	0.122	0.116	0.122	0.154	0.12	0.126	0.163	0.11	0.117	0.122
2955	0.437	0.495	0.479	0.395	0.422	0.5	0.481	0.527	0.512	0.511	0.534	0.533			0.428	0.415	0.427	0.259	0.277	0.275	0.632	0.694	0.617	0.29	0.324		0.139	0.121	0.116	0.122	0.154	0.12	0.126	0.163	0.11	0.118	0.122
2967	0.437	0.494	0.479	0.395	0.422	0.499	0.479	0.526	0.509	0.509	0.535	0.53			0.428	0.415	0.427	0.259	0.278	0.275	0.631	0.693	0.616	0.29	0.324		0.139	0.121	0.116	0.122	0.151	0.12	0.127	0.163	0.111	0.118	0.122
2979	0.437	0.493	0.477	0.395	0.422	0.5	0.479	0.528	0.509	0.509	0.533	0.533			0.428	0.415	0.426	0.258	0.276	0.275	0.631	0.692	0.616	0.289	0.323		0.139	0.121	0.116	0.122	0.153	0.12	0.126	0.162	0.11	0.117	0.122
2991	0.437	0.493	0.477	0.394	0.421	0.497	0.477	0.527	0.507	0.507	0.534	0.529			0.427	0.414	0.425	0.257	0.276	0.275	0.63	0.692	0.613	0.29	0.322		0.137	0.122	0.116	0.121	0.151	0.119	0.126	0.161	0.111	0.118	0.122
3003	0.436	0.493	0.478	0.393	0.422	0.496	0.476	0.527	0.506	0.506	0.532	0.53			0.427	0.414	0.425	0.257	0.276	0.275	0.629	0.692	0.613	0.289	0.322		0.138	0.122	0.116	0.122	0.152	0.119	0.125	0.16	0.11	0.118	0.122
3015	0.436	0.492	0.475	0.393	0.421	0.495	0.477	0.526	0.509	0.506	0.533	0.531			0.426	0.413	0.424	0.256	0.276	0.275	0.628	0.692	0.611	0.289	0.323		0.137	0.122	0.116	0.122	0.152	0.119	0.126	0.159	0.11	0.118	0.122
3027	0.436	0.491	0.476	0.393	0.421	0.494	0.474	0.525	0.505	0.504	0.533	0.528			0.426	0.412	0.424	0.255	0.276	0.274	0.626	0.691	0.611	0.289	0.323		0.136	0.121	0.116	0.122	0.152	0.119	0.127	0.159	0.111	0.118	0.121
3039	0.436	0.49	0.473	0.393	0.42	0.496	0.474	0.526	0.507	0.504	0.532	0.529			0.425	0.413	0.422	0.255	0.275	0.274	0.626	0.691	0.611	0.288	0.322		0.136	0.121	0.116	0.123	0.152	0.119	0.126	0.159	0.11	0.117	0.122
3051	0.436	0.491	0.472	0.392	0.421	0.492	0.472	0.525	0.504	0.503	0.532	0.528			0.425	0.411	0.422	0.254	0.274	0.274	0.626	0.69	0.609	0.288	0.322		0.135	0.121	0.116	0.123	0.148	0.118	0.126	0.157	0.11	0.117	0.121
3063	0.435	0.489	0.473	0.391	0.42	0.492	0.47	0.525	0.502	0.502	0.532	0.527			0.425	0.411	0.422	0.254	0.275	0.274	0.624	0.69	0.609	0.288	0.322		0.135	0.121	0.117	0.123	0.151	0.118	0.126	0.157	0.11	0.117	0.122
3075	0.435	0.489	0.471	0.391	0.42	0.49	0.472	0.525	0.504	0.502	0.531	0.528			0.424	0.41	0.421	0.254	0.274	0.274	0.623	0.689	0.607	0.288	0.322		0.135	0.121	0.116	0.123	0.15	0.118	0.126	0.156	0.11	0.118	0.122
3087	0.435	0.487	0.47	0.39	0.419	0.489	0.469	0.524	0.5	0.501	0.532	0.526			0.424	0.409	0.42	0.253	0.274	0.274	0.621	0.689	0.607	0.288	0.321		0.134	0.121	0.117	0.123	0.149	0.118	0.126	0.156	0.111	0.118	0.122
3099	0.435	0.487	0.469	0.391	0.419	0.49	0.469	0.526	0.5	0.501	0.53	0.529			0.423	0.409	0.419	0.252	0.273	0.273	0.62	0.689	0.606	0.288	0.321		0.134	0.12	0.116	0.123	0.149	0.118	0.126	0.155	0.11	0.117	0.121
3111	0.434	0.486	0.468	0.39	0.419	0.487	0.466	0.524	0.499	0.499	0.531	0.525			0.423	0.409	0.419	0.252	0.272	0.273	0.621	0.688	0.604	0.288	0.321		0.133	0.121	0.116	0.122	0.147	0.118	0.126	0.155	0.11	0.117	0.121
3123	0.434	0.485	0.466	0.389	0.419	0.486	0.465	0.525	0.498	0.499	0.53	0.529			0.422	0.408	0.418	0.251	0.273	0.273	0.617	0.688	0.603	0.287	0.321		0.132	0.121	0.117	0.123	0.148	0.118	0.126	0.154	0.111	0.117	0.122
3135	0.434	0.485	0.466	0.388	0.419	0.484	0.465	0.525	0.498	0.496	0.532	0.524			0.422	0.407	0.417	0.251	0.271	0.273	0.617	0.687	0.602	0.287	0.321		0.132	0.121	0.117	0.123	0.147	0.118	0.126	0.153	0.111	0.118	0.122
3147	0.434	0.483	0.466	0.388	0.418	0.484	0.462	0.524	0.496	0.496	0.529	0.524			0.421	0.407	0.416	0.25	0.272	0.273	0.614	0.687	0.601	0.287	0.32		0.131	0.121	0.116	0.123	0.147	0.117	0.126	0.153	0.11	0.117	0.121
3159	0.433	0.484	0.463	0.388	0.418	0.485	0.465	0.523	0.497	0.497	0.529	0.527			0.42	0.406	0.415	0.25	0.271	0.273	0.613	0.686	0.6	0.287	0.32		0.131	0.12	0.117	0.123	0.147	0.117	0.126	0.152	0.11	0.117	0.121
3171	0.433	0.481	0.463	0.387	0.418	0.482	0.46	0.523	0.494	0.495	0.531	0.522			0.42	0.405	0.415	0.248	0.271	0.273	0.611	0.685	0.599	0.287	0.32		0.131	0.12	0.117	0.123	0.144	0.117	0.126	0.151	0.11	0.117	0.121
3183	0.433	0.481	0.461	0.387	0.417	0.483	0.46	0.523	0.494	0.495	0.528	0.525			0.419	0.405	0.414	0.248	0.27	0.272	0.61	0.686	0.599	0.287	0.319		0.131	0.121	0.116	0.123	0.146	0.117	0.126	0.151	0.11	0.117	0.121
3195	0.433	0.482	0.461	0.386	0.417	0.479	0.457	0.522	0.491	0.492	0.529	0.521			0.419	0.403	0.414	0.248	0.269	0.272	0.612	0.684	0.597	0.287	0.32		0.13	0.12	0.117	0.123	0.145	0.117	0.126	0.15	0.11	0.117	0.121
3207	0.433	0.479	0.461	0.385	0.416	0.478	0.456	0.522	0.491	0.492	0.528	0.521			0.419	0.404	0.413	0.247	0.27	0.272	0.608	0.685	0.598	0.286	0.319		0.13	0.12	0.116	0.123	0.146	0.117	0.126	0.15	0.111	0.117	0.122
3219	0.432	0.48	0.458	0.386	0.416	0.479	0.457	0.522	0.492	0.492	0.527	0.519			0.418	0.402	0.412	0.245	0.269	0.271	0.608	0.683	0.596	0.286	0.319		0.13	0.12	0.116	0.122	0.145	0.117	0.126	0.148	0.11	0.117	0.121
3231	0.432	0.477	0.459	0.385	0.417	0.477	0.453	0.522	0.489	0.491	0.526	0.519			0.418	0.402	0.411	0.245	0.268	0.272	0.605	0.682	0.596	0.286	0.319		0.13	0.12	0.117	0.123	0.142	0.116	0.126	0.148	0.111	0.118	0.122
3243	0.432	0.478	0.456	0.385	0.416	0.477	0.454	0.522	0.489	0.491	0.527	0.521			0.417	0.401	0.411	0.245	0.268	0.272	0.602	0.681	0.593	0.286	0.319		0.129	0.121	0.117	0.122	0.143	0.116	0.126	0.147	0.111	0.116	0.121
3255	0.431	0.475	0.457	0.383	0.416	0.474	0.451	0.523	0.487	0.488	0.527	0.518			0.416	0.401	0.41	0.244	0.268	0.272	0.603	0.68	0.593	0.286	0.318		0.129	0.12	0.117	0.123	0.143	0.117	0.126	0.146	0.11	0.116	0.121
3267	0.431	0.474	0.452	0.383	0.415	0.473	0.45	0.521	0.486	0.49	0.525	0.522			0.416	0.401	0.408	0.244	0.268	0.271	0.599	0.682	0.592	0.285	0.318		0.128	0.121	0.117	0.122	0.144	0.116	0.126	0.146	0.111	0.117	0.122
3279	0.43	0.475	0.452	0.383	0.415	0.475	0.451	0.521	0.486	0.488	0.527	0.516			0.415	0.399	0.408	0.242	0.266	0.271	0.6	0.679	0.59	0.285	0.318		0.128	0.121	0.117	0.122	0.142	0.116	0.125	0.146	0.11	0.119	0.121
3291	0.43	0.472	0.452	0.382	0.415	0.471	0.446	0.521	0.484	0.488	0.525	0.521			0.415	0.399	0.407	0.241	0.266	0.271	0.595	0.679	0.589	0.286	0.318		0.129	0.12	0.117	0.123	0.139	0.116	0.126	0.145	0.111	0.118	0.122
3303	0.43	0.474	0.449	0.382	0.414	0.471	0.448	0.52	0.483	0.484	0.527	0.515			0.414	0.398	0.405	0.24	0.265	0.27	0.593	0.677	0.588	0.286	0.319		0.128	0.121	0.117	0.123	0.141	0.116	0.125	0.145	0.111	0.117	0.122
3315	0.429	0.47	0.449	0.38	0.414	0.468	0.443	0.52	0.481	0.485	0.524	0.514			0.413	0.398	0.404	0.241	0.265	0.27	0.594	0.676	0.588	0.285	0.318		0.128	0.121	0.117	0.123	0.141	0.116	0.125	0.144	0.111	0.117	0.122
3327	0.429	0.47	0.446	0.38	0.414	0.467	0.442	0.519	0.48	0.484	0.524	0.512			0.413	0.396	0.404	0.239	0.266	0.27	0.59	0.677	0.587	0.285	0.318		0.128	0.12	0.116	0.122	0.14	0.116	0.126	0.144	0.111	0.117	0.122
3339	0.429	0.468	0.446	0.38	0.413	0.469	0.44	0.518	0.479	0.483	0.524	0.512			0.412	0.397	0.404	0.239	0.264	0.27	0.592	0.674	0.585	0.284	0.318		0.128	0.121	0.116	0.123	0.139	0.116	0.125	0.142	0.111	0.118	0.121
3351	0.428	0.466	0.444	0.378	0.413	0.465	0.439	0.518	0.478	0.483	0.523	0.515			0.411	0.396	0.402	0.237	0.264	0.269	0.585	0.675	0.584	0.285	0.318		0.127	0.12	0.117	0.122	0.137	0.116	0.126	0.142	0.11	0.119	0.121
3363	0.428	0.469	0.442	0.379	0.412	0.466	0.441	0.517	0.478	0.482	0.524	0.51			0.41	0.395	0.401	0.237	0.263	0.269	0.586	0.673	0.583	0.284	0.317		0.127	0.121	0.116	0.123	0.138	0.116	0.125	0.142	0.111	0.118	0.121
3375	0.428	0.464	0.443	0.377	0.413	0.462	0.436	0.517	0.475	0.481	0.522	0.515			0.41	0.394	0.4	0.237	0.262	0.269	0.581	0.671	0.582	0.284	0.318		0.128	0.121	0.117	0.123	0.137	0.116	0.125	0.141	0.11	0.117	0.121
3387	0.426	0.465	0.44	0.376	0.412	0.461	0.437	0.516	0.475	0.48	0.524	0.509			0.409	0.393	0.4	0.236	0.264	0.269	0.579	0.669	0.581	0.284	0.317		0.127	0.121	0.116	0.123	0.138	0.115	0.126	0.141	0.111	0.117	0.121
3399	0.426	0.461	0.438	0.376	0.411	0.46	0.432	0.515	0.473	0.479	0.521	0.513			0.408	0.393	0.399	0.235	0.262	0.269	0.582	0.669	0.581	0.283	0.317		0.126	0.12	0.116	0.123	0.137	0.115	0.125	0.139	0.111	0.117	0.121
3411	0.427	0.461	0.441	0.375	0.411	0.459	0.43	0.515	0.47	0.478	0.523	0.508			0.407	0.393	0.396	0.234	0.263	0.268	0.575	0.671	0.578	0.284	0.317		0.126	0.12	0.116	0.123	0.135	0.115	0.126	0.139	0.111	0.117	0.121
3423	0.425	0.462	0.435	0.376	0.411	0.461	0.43	0.514	0.47	0.477	0.519	0.508			0.408	0.391	0.397	0.233	0.26	0.268	0.577	0.666	0.578	0.284	0.317		0.127	0.12	0.117	0.123	0.136	0.115	0.126	0.139	0.111	0.117	0.121
3435	0.425	0.458	0.434	0.374	0.411	0.457	0.427	0.514	0.468	0.477	0.519	0.508			0.406	0.391	0.396	0.233	0.261	0.268	0.57	0.667	0.576	0.283	0.317		0.126	0.121	0.116	0.123	0.134	0.115	0.125	0.138	0.11	0.117	0.121
3447	0.425	0.457	0.432	0.373	0.41	0.455	0.431	0.513	0.467	0.476	0.521	0.504			0.406	0.391	0.395	0.232	0.261	0.267	0.57	0.663	0.575	0.283	0.316		0.127	0.12	0.116	0.123	0.135	0.115	0.125	0.138	0.11	0.117	0.121
3459	0.425	0.459	0.431	0.372	0.41	0.454	0.425	0.513	0.466	0.476	0.518	0.509			0.405	0.389	0.393	0.232	0.259	0.267	0.566	0.663	0.575	0.283	0.316		0.126	0.121	0.116	0.123	0.134	0.115	0.125	0.138	0.111	0.117	0.121
3471	0.424	0.454	0.431	0.372	0.409	0.453	0.425	0.511	0.464	0.473	0.52	0.503			0.404	0.388	0.392	0.231	0.26	0.267	0.564	0.661	0.573	0.283	0.317		0.126	0.121	0.117	0.123	0.133	0.115	0.126	0.137	0.111	0.117	0.121
3483	0.423	0.454	0.427	0.373	0.409	0.456	0.42	0.511	0.462	0.474	0.518	0.505			0.402	0.388	0.39	0.23	0.258	0.267	0.568	0.659	0.573	0.283	0.317		0.126	0.121	0.116	0.122	0.133	0.115	0.125	0.137	0.111	0.117	0.121
3495	0.423	0.452	0.426	0.37	0.408	0.451	0.418	0.509	0.462	0.472	0.518	0.502			0.403	0.388	0.391	0.229	0.257	0.266	0.559	0.662	0.571	0.283	0.316		0.126	0.122	0.116	0.123	0.133	0.115	0.125	0.137	0.11	0.116	0.121
3507	0.423	0.451	0.428	0.37	0.408	0.451	0.42	0.509	0.46	0.471	0.518	0.5			0.402	0.388	0.389	0.228	0.257	0.266	0.561	0.657	0.571	0.282	0.316		0.126	0.12	0.116	0.123	0.135	0.115	0.125	0.136	0.111	0.117	0.121
3519	0.422	0.453	0.423	0.369	0.407	0.448	0.416	0.509	0.458	0.47	0.516	0.503			0.401	0.386	0.388	0.228	0.257	0.266	0.554	0.658	0.571	0.282	0.316		0.126	0.121	0.117	0.123	0.135	0.115	0.125	0.135	0.11	0.117	0.122
3531	0.422	0.448	0.424	0.368	0.407	0.447	0.418	0.507	0.457	0.469	0.518	0.498			0.401	0.385	0.387	0.227	0.258	0.265	0.552	0.653	0.568	0.282	0.315		0.126	0.121	0.117	0.123	0.137	0.115	0.125	0.135	0.11	0.117	0.121
3543	0.421	0.448	0.42	0.369	0.406	0.449	0.412	0.507	0.454	0.469	0.515	0.502			0.399	0.385	0.385	0.225	0.255	0.265	0.551	0.652	0.567	0.282	0.315		0.125	0.12	0.117	0.122	0.137	0.115	0.125	0.134	0.11	0.117	0.121
3555	0.42	0.445	0.419	0.367	0.407	0.445	0.41	0.505	0.454	0.468	0.517	0.496			0.399	0.384	0.386	0.225	0.255	0.265	0.547	0.653	0.566	0.282	0.314		0.126	0.121	0.117	0.123	0.134	0.114	0.125	0.134	0.11	0.117	0.121
3567	0.419	0.444	0.416	0.367	0.405	0.445	0.408	0.504	0.451	0.467	0.514	0.499			0.398	0.384	0.384	0.224	0.254	0.265	0.553	0.649	0.567	0.282	0.315		0.126	0.121	0.117	0.122	0.131	0.115	0.126	0.134	0.11	0.117	0.121
3579	0.419	0.443	0.415	0.365	0.405	0.442	0.406	0.503	0.449	0.466	0.514	0.493			0.398	0.382	0.384	0.224	0.254	0.264	0.543	0.651	0.566	0.281	0.315		0.126	0.121	0.116	0.123	0.13	0.115	0.125	0.133	0.11	0.117	0.121
3591	0.42	0.441	0.418	0.364	0.404	0.44	0.411	0.502	0.447	0.464	0.514	0.492			0.396	0.383	0.381	0.223	0.254	0.264	0.543	0.645	0.563	0.281	0.315		0.126	0.121	0.116	0.122	0.131	0.115	0.126	0.132	0.111	0.117	0.121
3603	0.418	0.441	0.411	0.366	0.404	0.444	0.403	0.504	0.446	0.465	0.512	0.498			0.395	0.381	0.38	0.221	0.252	0.264	0.536	0.643	0.562	0.281	0.314		0.125	0.121	0.116	0.122	0.131	0.115	0.125	0.132	0.111	0.116	0.121
3615	0.417	0.437	0.412	0.362	0.404	0.438	0.404	0.5	0.444	0.463	0.515	0.49			0.395	0.381	0.38	0.221	0.251	0.263	0.534	0.64	0.561	0.281	0.314		0.125	0.121	0.116	0.122	0.129	0.114	0.125	0.131	0.11	0.116	0.121
3627	0.417	0.436	0.407	0.363	0.403	0.439	0.398	0.5	0.443	0.463	0.511	0.497			0.393	0.381	0.377	0.218	0.251	0.263	0.54	0.639	0.562	0.282	0.315		0.125	0.12	0.117	0.122	0.13	0.114	0.125	0.131	0.11	0.117	0.12
3639	0.416	0.438	0.406	0.36	0.403	0.435	0.397	0.497	0.441	0.461	0.514	0.488			0.392	0.38	0.377	0.22	0.25	0.263	0.529	0.643	0.56	0.281	0.314		0.125	0.121	0.116	0.123	0.129	0.115	0.125	0.131	0.11	0.116	0.121
3651	0.416	0.434	0.406	0.36	0.402	0.433	0.399	0.496	0.438	0.461	0.51	0.487			0.392	0.379	0.376	0.218	0.251	0.262	0.531	0.636	0.558	0.28	0.314		0.125	0.121	0.116	0.123	0.129	0.114	0.125	0.13	0.11	0.116	0.12
3663	0.414	0.435	0.403	0.361	0.401	0.436	0.393	0.498	0.437	0.46	0.509	0.486			0.392	0.378	0.375	0.217	0.25	0.261	0.523	0.636	0.556	0.28	0.314		0.126	0.121	0.117	0.123	0.129	0.115	0.125	0.13	0.111	0.116	0.121
3675	0.415	0.43	0.405	0.358	0.402	0.431	0.395	0.493	0.434	0.459	0.511	0.485			0.391	0.378	0.374	0.217	0.249	0.261	0.522	0.631	0.555	0.28	0.313		0.125	0.121	0.116	0.123	0.128	0.115	0.125	0.13	0.11	0.116	0.12
3687	0.413	0.429	0.398	0.357	0.4	0.43	0.389	0.494	0.433	0.458	0.508	0.486			0.389	0.378	0.372	0.216	0.249	0.261	0.525	0.629	0.555	0.28	0.313		0.125	0.121	0.117	0.123	0.131	0.115	0.125	0.13	0.111	0.117	0.121
3699	0.413	0.427	0.4	0.356	0.399	0.428	0.388	0.492	0.43	0.458	0.509	0.483			0.39	0.376	0.373	0.216	0.248	0.261	0.516	0.634	0.554	0.28	0.313		0.125	0.121	0.116	0.122	0.128	0.115	0.125	0.13	0.11	0.116	0.12
3711	0.412	0.426	0.395	0.355	0.4	0.427	0.388	0.49	0.43	0.456	0.506	0.488			0.388	0.377	0.371	0.213	0.249	0.26	0.518	0.625	0.553	0.28	0.313		0.125	0.121	0.117	0.123	0.129	0.115	0.125	0.129	0.11	0.116	0.121
3723	0.411	0.427	0.394	0.356	0.399	0.429	0.384	0.492	0.428	0.456	0.509	0.481			0.387	0.375	0.37	0.213	0.247	0.26	0.51	0.627	0.552	0.28	0.313		0.125	0.121	0.117	0.123	0.129	0.115	0.125	0.129	0.11	0.116	0.12
3735	0.412	0.423	0.396	0.354	0.399	0.425	0.386	0.488	0.425	0.455	0.506	0.481			0.387	0.376	0.369	0.211	0.246	0.259	0.507	0.62	0.55	0.279	0.312		0.125	0.122	0.117	0.123	0.128	0.115	0.125	0.129	0.11	0.116	0.121
3747	0.409	0.424	0.39	0.353	0.398	0.423	0.38	0.489	0.422	0.452	0.506	0.478			0.386	0.373	0.367	0.211	0.247	0.258	0.511	0.619	0.551	0.279	0.313		0.125	0.121	0.117	0.123	0.128	0.115	0.125	0.128	0.11	0.116	0.12
3759	0.41	0.419	0.392	0.351	0.397	0.421	0.378	0.485	0.421	0.452	0.505	0.477			0.385	0.373	0.367	0.21	0.245	0.259	0.503	0.624	0.549	0.279	0.312		0.125	0.122	0.117	0.123	0.127	0.115	0.125	0.128	0.11	0.116	0.12
3771	0.408	0.418	0.386	0.35	0.397	0.42	0.378	0.484	0.418	0.453	0.504	0.481			0.383	0.374	0.364	0.209	0.245	0.258	0.504	0.614	0.547	0.279	0.312		0.125	0.121	0.117	0.122	0.127	0.115	0.125	0.127	0.111	0.117	0.121
3783	0.407	0.417	0.384	0.352	0.396	0.423	0.373	0.485	0.418	0.451	0.507	0.475			0.384	0.371	0.365	0.209	0.243	0.257	0.496	0.617	0.547	0.278	0.312		0.125	0.121	0.117	0.123	0.126	0.114	0.125	0.127	0.11	0.116	0.121
3795	0.408	0.415	0.388	0.349	0.396	0.417	0.377	0.481	0.414	0.451	0.502	0.479			0.381	0.371	0.361	0.207	0.242	0.256	0.494	0.609	0.545	0.278	0.311		0.125	0.121	0.116	0.122	0.124	0.115	0.125	0.127	0.11	0.116	0.121
3807	0.405	0.418	0.381	0.349	0.394	0.417	0.37	0.481	0.413	0.449	0.505	0.472			0.381	0.37	0.361	0.207	0.242	0.256	0.496	0.607	0.544	0.278	0.311		0.126	0.122	0.116	0.123	0.123	0.115	0.125	0.127	0.11	0.116	0.121
3819	0.406	0.412	0.382	0.346	0.393	0.414	0.367	0.478	0.41	0.449	0.501	0.471			0.38	0.369	0.36	0.207	0.241	0.256	0.487	0.611	0.543	0.278	0.311		0.125	0.121	0.116	0.122	0.123	0.115	0.125	0.127	0.11	0.117	0.121
3831	0.404	0.412	0.377	0.346	0.392	0.413	0.367	0.476	0.409	0.448	0.499	0.475			0.38	0.37	0.359	0.205	0.241	0.255	0.49	0.603	0.542	0.278	0.311		0.125	0.122	0.117	0.123	0.123	0.115	0.125	0.126	0.11	0.116	0.12
3843	0.402	0.408	0.374	0.347	0.392	0.416	0.363	0.478	0.406	0.447	0.502	0.469			0.379	0.368	0.359	0.204	0.24	0.255	0.481	0.604	0.54	0.278	0.31		0.125	0.121	0.117	0.122	0.124	0.115	0.125	0.126	0.11	0.116	0.121
3855	0.404	0.407	0.379	0.344	0.392	0.411	0.368	0.474	0.402	0.446	0.498	0.474			0.378	0.368	0.357	0.203	0.239	0.254	0.479	0.598	0.539	0.277	0.311		0.125	0.121	0.116	0.122	0.124	0.115	0.125	0.126	0.11	0.116	0.121
3867	0.401	0.41	0.371	0.343	0.39	0.41	0.359	0.475	0.402	0.446	0.501	0.466			0.376	0.366	0.355	0.203	0.239	0.254	0.48	0.595	0.54	0.277	0.31		0.125	0.12	0.117	0.122	0.125	0.115	0.126	0.126	0.11	0.116	0.121
3879	0.401	0.403	0.374	0.342	0.39	0.408	0.357	0.471	0.4	0.445	0.497	0.465			0.376	0.366	0.356	0.203	0.238	0.254	0.473	0.597	0.538	0.277	0.31		0.126	0.122	0.117	0.123	0.124	0.115	0.125	0.125	0.111	0.116	0.121
3891	0.399	0.402	0.366	0.341	0.389	0.406	0.355	0.47	0.398	0.444	0.497	0.465			0.375	0.367	0.352	0.2	0.237	0.252	0.479	0.591	0.537	0.277	0.31		0.125	0.121	0.116	0.122	0.124	0.115	0.125	0.126	0.11	0.116	0.121
3903	0.398	0.404	0.365	0.343	0.388	0.41	0.352	0.471	0.394	0.443	0.498	0.462			0.375	0.364	0.354	0.2	0.236	0.252	0.467	0.592	0.535	0.277	0.309		0.124	0.121	0.117	0.122	0.124	0.114	0.125	0.125	0.11	0.117	0.12
3915	0.399	0.398	0.368	0.339	0.389	0.404	0.358	0.466	0.392	0.443	0.494	0.469			0.373	0.365	0.35	0.198	0.236	0.251	0.464	0.583	0.534	0.277	0.309		0.124	0.122	0.117	0.122	0.124	0.115	0.125	0.125	0.11	0.117	0.121
3927	0.396	0.4	0.361	0.339	0.386	0.404	0.349	0.469	0.39	0.44	0.497	0.46			0.372	0.363	0.349	0.198	0.235	0.251	0.463	0.582	0.533	0.277	0.309		0.124	0.122	0.117	0.123	0.124	0.114	0.125	0.124	0.11	0.117	0.12
3939	0.397	0.395	0.364	0.337	0.385	0.401	0.347	0.464	0.389	0.439	0.493	0.463			0.371	0.362	0.349	0.198	0.233	0.251	0.459	0.586	0.532	0.276	0.308		0.124	0.121	0.116	0.123	0.123	0.115	0.125	0.124	0.11	0.116	0.121
3951	0.394	0.392	0.356	0.336	0.385	0.4	0.345	0.463	0.386	0.439	0.496	0.457			0.37	0.363	0.347	0.194	0.235	0.249	0.463	0.577	0.531	0.276	0.308		0.125	0.121	0.116	0.122	0.124	0.115	0.125	0.124	0.111	0.117	0.121
3963	0.393	0.396	0.354	0.338	0.384	0.402	0.342	0.463	0.384	0.438	0.492	0.458			0.37	0.362	0.348	0.195	0.232	0.25	0.452	0.579	0.53	0.276	0.308		0.125	0.122	0.117	0.123	0.126	0.115	0.125	0.124	0.11	0.117	0.121
3975	0.394	0.389	0.358	0.334	0.385	0.397	0.347	0.459	0.38	0.438	0.491	0.461			0.368	0.36	0.345	0.194	0.232	0.249	0.45	0.572	0.529	0.276	0.309		0.125	0.121	0.116	0.122	0.127	0.115	0.124	0.124	0.11	0.116	0.12
3987	0.39	0.39	0.351	0.333	0.382	0.396	0.337	0.46	0.381	0.437	0.493	0.452			0.367	0.359	0.344	0.193	0.232	0.248	0.449	0.569	0.527	0.275	0.306		0.125	0.121	0.116	0.122	0.126	0.115	0.125	0.124	0.11	0.116	0.12
3999	0.391	0.385	0.353	0.332	0.382	0.394	0.337	0.455	0.376	0.435	0.489	0.455			0.367	0.359	0.343	0.193	0.23	0.248	0.443	0.571	0.526	0.275	0.307		0.124	0.122	0.117	0.122	0.126	0.115	0.125	0.123	0.111	0.116	0.121
4011	0.389	0.384	0.346	0.331	0.382	0.393	0.333	0.454	0.374	0.435	0.489	0.449			0.366	0.36	0.342	0.191	0.231	0.247	0.45	0.563	0.526	0.275	0.308		0.125	0.122	0.116	0.123	0.125	0.115	0.125	0.124	0.111	0.116	0.121
4023	0.387	0.386	0.344	0.333	0.38	0.395	0.331	0.454	0.372	0.434	0.49	0.447			0.364	0.358	0.34	0.189	0.228	0.246	0.436	0.567	0.523	0.275	0.306		0.124	0.122	0.116	0.123	0.125	0.115	0.124	0.124	0.11	0.116	0.121
4035	0.389	0.38	0.349	0.329	0.381	0.39	0.336	0.45	0.369	0.432	0.487	0.453			0.363	0.357	0.338	0.191	0.227	0.246	0.437	0.558	0.523	0.274	0.307		0.125	0.121	0.117	0.123	0.126	0.115	0.125	0.124	0.11	0.116	0.12
4047	0.385	0.381	0.34	0.327	0.378	0.388	0.327	0.454	0.369	0.432	0.49	0.444			0.363	0.355	0.338	0.188	0.227	0.245	0.43	0.554	0.521	0.274	0.305		0.124	0.121	0.116	0.123	0.125	0.115	0.125	0.123	0.11	0.116	0.121
4059	0.385	0.376	0.343	0.326	0.377	0.387	0.329	0.447	0.365	0.432	0.485	0.453			0.361	0.355	0.336	0.188	0.225	0.245	0.427	0.551	0.52	0.274	0.305		0.124	0.122	0.116	0.122	0.126	0.115	0.125	0.123	0.111	0.116	0.121
4071	0.382	0.378	0.336	0.326	0.378	0.386	0.322	0.447	0.364	0.43	0.488	0.442			0.36	0.354	0.335	0.188	0.226	0.244	0.434	0.547	0.52	0.274	0.304		0.124	0.121	0.116	0.123	0.126	0.115	0.125	0.123	0.11	0.116	0.121
4083	0.385	0.372	0.34	0.327	0.375	0.387	0.32	0.444	0.361	0.429	0.483	0.447			0.36	0.354	0.336	0.186	0.224	0.243	0.422	0.556	0.517	0.273	0.306		0.125	0.122	0.116	0.123	0.126	0.115	0.125	0.123	0.111	0.116	0.121
4095	0.38	0.37	0.332	0.323	0.376	0.383	0.321	0.442	0.36	0.429	0.487	0.439			0.358	0.356	0.332	0.185	0.222	0.243	0.425	0.543	0.517	0.273	0.304		0.125	0.122	0.116	0.122	0.126	0.115	0.125	0.123	0.111	0.115	0.12
4107	0.379	0.375	0.33	0.322	0.374	0.381	0.316	0.444	0.358	0.428	0.481	0.444			0.357	0.353	0.331	0.184	0.223	0.242	0.415	0.545	0.514	0.273	0.304		0.124	0.122	0.116	0.122	0.127	0.115	0.125	0.123	0.11	0.116	0.12
4119	0.38	0.368	0.335	0.323	0.372	0.383	0.322	0.439	0.354	0.427	0.483	0.436			0.356	0.352	0.33	0.184	0.221	0.242	0.413	0.538	0.514	0.273	0.305		0.124	0.122	0.116	0.122	0.127	0.115	0.125	0.123	0.11	0.115	0.12
4131	0.377	0.368	0.326	0.32	0.374	0.379	0.312	0.442	0.353	0.426	0.479	0.435			0.356	0.352	0.33	0.184	0.22	0.241	0.408	0.534	0.511	0.272	0.303		0.125	0.122	0.116	0.123	0.126	0.114	0.125	0.122	0.11	0.116	0.12
4143	0.375	0.363	0.326	0.322	0.371	0.381	0.313	0.435	0.351	0.425	0.479	0.433			0.356	0.35	0.329	0.181	0.22	0.239	0.406	0.534	0.511	0.272	0.305		0.124	0.122	0.116	0.123	0.126	0.115	0.125	0.122	0.111	0.116	0.12
4155	0.374	0.362	0.322	0.317	0.371	0.375	0.307	0.433	0.35	0.425	0.482	0.433			0.354	0.352	0.327	0.182	0.218	0.24	0.414	0.527	0.511	0.273	0.303		0.124	0.122	0.117	0.123	0.126	0.115	0.124	0.122	0.111	0.116	0.121
4167	0.371	0.366	0.32	0.316	0.369	0.374	0.305	0.433	0.348	0.424	0.478	0.436			0.354	0.349	0.327	0.18	0.219	0.238	0.401	0.531	0.508	0.272	0.304		0.125	0.123	0.116	0.123	0.126	0.115	0.125	0.122	0.11	0.116	0.12
4179	0.373	0.358	0.325	0.32	0.368	0.378	0.311	0.429	0.344	0.422	0.481	0.429			0.352	0.349	0.324	0.181	0.217	0.238	0.397	0.522	0.506	0.271	0.303		0.126	0.123	0.116	0.123	0.126	0.115	0.124	0.122	0.11	0.116	0.121
4191	0.37	0.362	0.317	0.315	0.369	0.372	0.301	0.431	0.344	0.421	0.476	0.433			0.351	0.348	0.323	0.18	0.216	0.237	0.396	0.518	0.505	0.271	0.302		0.125	0.122	0.116	0.122	0.126	0.115	0.125	0.122	0.11	0.115	0.12
4203	0.371	0.354	0.32	0.315	0.366	0.372	0.301	0.425	0.342	0.421	0.477	0.426			0.351	0.347	0.324	0.179	0.214	0.236	0.391	0.52	0.504	0.271	0.303		0.124	0.123	0.116	0.123	0.126	0.115	0.124	0.122	0.111	0.115	0.12
4215	0.366	0.353	0.312	0.312	0.364	0.368	0.296	0.424	0.339	0.42	0.475	0.424			0.349	0.349	0.321	0.179	0.214	0.236	0.399	0.514	0.504	0.271	0.301		0.125	0.123	0.116	0.123	0.126	0.115	0.125	0.122	0.111	0.115	0.12
4227	0.364	0.357	0.31	0.311	0.363	0.367	0.294	0.421	0.337	0.419	0.473	0.431			0.349	0.346	0.321	0.177	0.215	0.235	0.385	0.52	0.5	0.271	0.302		0.125	0.122	0.116	0.123	0.126	0.115	0.124	0.122	0.11	0.115	0.121
4239	0.364	0.35	0.312	0.314	0.362	0.371	0.298	0.419	0.336	0.418	0.477	0.422			0.347	0.345	0.319	0.177	0.213	0.234	0.388	0.508	0.5	0.27	0.3		0.124	0.122	0.116	0.123	0.126	0.115	0.124	0.122	0.11	0.116	0.12
4251	0.362	0.351	0.307	0.309	0.364	0.364	0.29	0.423	0.333	0.417	0.472	0.428			0.346	0.344	0.318	0.176	0.212	0.233	0.379	0.509	0.496	0.269	0.3		0.124	0.122	0.116	0.123	0.126	0.115	0.125	0.122	0.11	0.116	0.12
4263	0.363	0.346	0.31	0.309	0.361	0.364	0.293	0.415	0.33	0.417	0.475	0.419			0.346	0.343	0.318	0.175	0.212	0.233	0.376	0.5	0.495	0.27	0.301		0.124	0.122	0.116	0.123	0.126	0.115	0.124	0.122	0.11	0.115	0.12
4275	0.36	0.347	0.303	0.306	0.359	0.361	0.286	0.417	0.329	0.416	0.47	0.421			0.344	0.343	0.315	0.175	0.21	0.233	0.38	0.496	0.495	0.269	0.299		0.124	0.122	0.116	0.123	0.126	0.114	0.125	0.121	0.11	0.115	0.12
4287	0.358	0.341	0.305	0.306	0.36	0.36	0.284	0.411	0.328	0.415	0.468	0.423			0.344	0.342	0.316	0.172	0.211	0.23	0.37	0.503	0.491	0.269	0.3		0.124	0.121	0.116	0.123	0.126	0.115	0.124	0.121	0.11	0.115	0.121
4299	0.356	0.34	0.299	0.308	0.357	0.362	0.281	0.409	0.328	0.414	0.472	0.414			0.342	0.344	0.313	0.173	0.209	0.23	0.374	0.492	0.493	0.27	0.298		0.125	0.122	0.116	0.123	0.126	0.115	0.124	0.121	0.11	0.116	0.12
4311	0.355	0.344	0.297	0.303	0.359	0.357	0.279	0.41	0.325	0.413	0.467	0.422			0.342	0.341	0.313	0.172	0.207	0.23	0.363	0.494	0.489	0.268	0.299		0.124	0.122	0.116	0.122	0.126	0.115	0.125	0.121	0.11	0.116	0.12
4323	0.357	0.337	0.301	0.302	0.355	0.356	0.285	0.405	0.322	0.413	0.471	0.412			0.34	0.34	0.31	0.171	0.208	0.229	0.362	0.486	0.488	0.269	0.298		0.125	0.122	0.116	0.123	0.127	0.115	0.124	0.121	0.111	0.115	0.12
4335	0.352	0.34	0.293	0.303	0.354	0.357	0.275	0.41	0.321	0.411	0.467	0.417			0.339	0.339	0.308	0.171	0.206	0.229	0.358	0.483	0.485	0.268	0.298		0.125	0.122	0.116	0.122	0.126	0.115	0.124	0.121	0.11	0.115	0.12
4347	0.352	0.332	0.292	0.3	0.356	0.353	0.276	0.401	0.318	0.41	0.466	0.408			0.338	0.338	0.308	0.17	0.206	0.227	0.355	0.482	0.483	0.268	0.299		0.124	0.122	0.116	0.123	0.127	0.115	0.124	0.121	0.111	0.116	0.121
4359	0.349	0.331	0.29	0.302	0.351	0.355	0.27	0.399	0.317	0.409	0.466	0.406			0.337	0.339	0.307	0.169	0.203	0.227	0.363	0.476	0.485	0.268	0.297		0.125	0.122	0.116	0.124	0.126	0.115	0.124	0.121	0.111	0.115	0.12
4371	0.348	0.335	0.288	0.297	0.354	0.349	0.269	0.398	0.314	0.409	0.462	0.415			0.336	0.337	0.306	0.169	0.203	0.226	0.349	0.479	0.478	0.267	0.297		0.124	0.122	0.116	0.123	0.127	0.115	0.125	0.121	0.11	0.115	0.12
4383	0.348	0.327	0.291	0.297	0.349	0.348	0.274	0.394	0.312	0.409	0.466	0.404			0.336	0.336	0.307	0.167	0.204	0.224	0.35	0.47	0.478	0.267	0.295		0.124	0.122	0.116	0.123	0.126	0.114	0.124	0.121	0.111	0.115	0.121
4395	0.344	0.328	0.284	0.296	0.349	0.347	0.265	0.399	0.311	0.408	0.461	0.402			0.334	0.337	0.302	0.167	0.2	0.225	0.343	0.467	0.475	0.267	0.295		0.124	0.122	0.116	0.122	0.126	0.115	0.124	0.121	0.111	0.115	0.121
4407	0.346	0.324	0.285	0.294	0.351	0.345	0.266	0.391	0.309	0.407	0.461	0.401			0.334	0.335	0.304	0.167	0.201	0.223	0.34	0.463	0.473	0.267	0.297		0.124	0.122	0.116	0.122	0.126	0.115	0.125	0.121	0.11	0.115	0.12
4419	0.343	0.322	0.279	0.297	0.347	0.348	0.26	0.392	0.309	0.406	0.462	0.399			0.332	0.337	0.301	0.165	0.199	0.222	0.347	0.46	0.475	0.266	0.295		0.124	0.123	0.116	0.122	0.126	0.115	0.124	0.121	0.11	0.115	0.12
4431	0.339	0.327	0.278	0.292	0.347	0.343	0.259	0.386	0.306	0.405	0.458	0.402			0.331	0.333	0.301	0.165	0.198	0.221	0.335	0.469	0.469	0.266	0.296		0.124	0.122	0.116	0.123	0.126	0.115	0.125	0.121	0.11	0.115	0.121
4443	0.34	0.319	0.28	0.291	0.345	0.341	0.262	0.384	0.304	0.404	0.461	0.397			0.33	0.333	0.299	0.164	0.198	0.221	0.338	0.455	0.471	0.266	0.294		0.124	0.122	0.116	0.123	0.126	0.115	0.124	0.121	0.11	0.115	0.12
4455	0.338	0.32	0.274	0.29	0.344	0.34	0.255	0.389	0.302	0.404	0.457	0.404			0.329	0.332	0.298	0.165	0.197	0.221	0.33	0.457	0.466	0.265	0.293		0.124	0.122	0.116	0.123	0.126	0.115	0.124	0.121	0.11	0.116	0.12
4467	0.337	0.316	0.272	0.288	0.342	0.337	0.257	0.38	0.298	0.403	0.459	0.393			0.329	0.332	0.298	0.163	0.196	0.219	0.327	0.446	0.463	0.265	0.293		0.124	0.123	0.116	0.123	0.126	0.115	0.124	0.121	0.11	0.115	0.12
4479	0.338	0.313	0.276	0.292	0.341	0.342	0.251	0.381	0.298	0.402	0.455	0.397			0.326	0.333	0.294	0.162	0.195	0.218	0.328	0.445	0.464	0.264	0.292		0.124	0.123	0.116	0.123	0.126	0.115	0.124	0.121	0.11	0.115	0.12
4491	0.334	0.317	0.269	0.286	0.343	0.336	0.249	0.375	0.296	0.401	0.455	0.389			0.326	0.33	0.294	0.162	0.194	0.217	0.322	0.452	0.461	0.264	0.294		0.124	0.122	0.116	0.123	0.126	0.115	0.125	0.121	0.111	0.116	0.121
4503	0.333	0.309	0.269	0.286	0.339	0.335	0.25	0.374	0.295	0.4	0.455	0.387			0.326	0.33	0.294	0.161	0.194	0.216	0.323	0.439	0.46	0.265	0.291		0.124	0.122	0.116	0.123	0.127	0.115	0.124	0.121	0.111	0.115	0.121
4515	0.33	0.308	0.264	0.283	0.338	0.332	0.245	0.377	0.293	0.4	0.451	0.397			0.324	0.331	0.292	0.162	0.191	0.217	0.315	0.442	0.456	0.264	0.292		0.124	0.122	0.116	0.123	0.126	0.115	0.124	0.121	0.11	0.116	0.12
4527	0.329	0.313	0.264	0.282	0.336	0.331	0.249	0.369	0.289	0.399	0.455	0.386			0.322	0.328	0.29	0.16	0.191	0.215	0.312	0.432	0.453	0.264	0.29		0.124	0.122	0.116	0.123	0.126	0.115	0.124	0.121	0.111	0.115	0.121
4539	0.328	0.304	0.266	0.286	0.334	0.335	0.241	0.37	0.288	0.398	0.45	0.392			0.322	0.327	0.29	0.159	0.189	0.214	0.314	0.427	0.453	0.263	0.29		0.124	0.122	0.116	0.123	0.126	0.115	0.124	0.121	0.11	0.115	0.12
4551	0.325	0.303	0.259	0.282	0.336	0.329	0.24	0.365	0.287	0.397	0.452	0.382			0.321	0.329	0.289	0.159	0.189	0.214	0.307	0.431	0.449	0.263	0.291		0.124	0.123	0.116	0.123	0.126	0.115	0.124	0.121	0.11	0.115	0.12
4563	0.323	0.305	0.258	0.28	0.332	0.328	0.237	0.362	0.285	0.397	0.448	0.381			0.321	0.326	0.289	0.158	0.188	0.212	0.315	0.424	0.453	0.263	0.289		0.124	0.123	0.116	0.123	0.126	0.115	0.124	0.121	0.111	0.115	0.121
4575	0.327	0.299	0.262	0.278	0.332	0.326	0.235	0.36	0.284	0.395	0.446	0.385			0.318	0.326	0.285	0.158	0.186	0.213	0.301	0.43	0.445	0.262	0.291		0.124	0.122	0.116	0.123	0.127	0.115	0.124	0.121	0.11	0.115	0.12
4587	0.322	0.301	0.254	0.277	0.332	0.324	0.24	0.359	0.281	0.394	0.448	0.376			0.318	0.325	0.286	0.156	0.187	0.21	0.305	0.417	0.448	0.262	0.288		0.124	0.122	0.116	0.123	0.127	0.115	0.124	0.121	0.111	0.115	0.12
4599	0.319	0.295	0.252	0.279	0.331	0.328	0.232	0.363	0.281	0.394	0.444	0.384			0.317	0.324	0.285	0.155	0.185	0.209	0.296	0.418	0.442	0.262	0.288		0.124	0.123	0.116	0.123	0.126	0.115	0.124	0.121	0.11	0.115	0.12
4611	0.318	0.294	0.251	0.274	0.331	0.321	0.233	0.354	0.277	0.393	0.446	0.372			0.316	0.325	0.283	0.155	0.183	0.209	0.294	0.407	0.438	0.262	0.287		0.124	0.122	0.116	0.123	0.127	0.115	0.124	0.121	0.111	0.115	0.12
4623	0.315	0.297	0.25	0.274	0.328	0.321	0.229	0.356	0.277	0.392	0.442	0.38			0.315	0.322	0.282	0.155	0.184	0.208	0.3	0.407	0.442	0.261	0.287		0.124	0.122	0.116	0.123	0.127	0.116	0.124	0.121	0.111	0.116	0.12
4635	0.317	0.291	0.251	0.272	0.327	0.319	0.226	0.349	0.275	0.392	0.446	0.369			0.314	0.322	0.282	0.155	0.181	0.208	0.288	0.415	0.433	0.261	0.287		0.124	0.122	0.116	0.123	0.126	0.117	0.124	0.121	0.111	0.115	0.12
4647	0.314	0.294	0.246	0.271	0.326	0.318	0.228	0.347	0.273	0.391	0.441	0.368			0.313	0.321	0.28	0.154	0.182	0.207	0.291	0.4	0.435	0.261	0.286		0.124	0.122	0.116	0.123	0.126	0.115	0.124	0.121	0.111	0.115	0.12
4659	0.315	0.287	0.249	0.274	0.325	0.321	0.223	0.351	0.272	0.39	0.438	0.37			0.313	0.32	0.279	0.152	0.18	0.205	0.283	0.403	0.429	0.258	0.287		0.124	0.122	0.116	0.123	0.126	0.115	0.124	0.121	0.111	0.115	0.12
4671	0.311	0.285	0.243	0.268	0.325	0.315	0.227	0.343	0.268	0.389	0.441	0.364			0.311	0.322	0.278	0.152	0.179	0.204	0.282	0.394	0.428	0.261	0.285		0.124	0.122	0.116	0.122	0.126	0.115	0.124	0.121	0.11	0.115	0.121
4683	0.309	0.284	0.241	0.268	0.321	0.314	0.22	0.346	0.269	0.389	0.438	0.371			0.311	0.319	0.278	0.151	0.178	0.203	0.281	0.393	0.428	0.259	0.286		0.124	0.122	0.116	0.123	0.127	0.115	0.124	0.121	0.111	0.115	0.121
4695	0.307	0.282	0.239	0.265	0.32	0.311	0.22	0.338	0.267	0.388	0.442	0.361			0.308	0.32	0.275	0.152	0.176	0.204	0.276	0.393	0.423	0.259	0.283		0.124	0.123	0.116	0.123	0.126	0.115	0.124	0.121	0.111	0.115	0.12
4707	0.306	0.284	0.238	0.264	0.32	0.31	0.216	0.337	0.265	0.388	0.436	0.37			0.309	0.318	0.276	0.149	0.177	0.201	0.283	0.385	0.427	0.258	0.283		0.124	0.122	0.116	0.123	0.127	0.115	0.125	0.121	0.11	0.115	0.12
4719	0.306	0.279	0.239	0.267	0.319	0.314	0.214	0.336	0.264	0.386	0.438	0.358			0.307	0.319	0.274	0.149	0.175	0.201	0.271	0.389	0.418	0.258	0.282		0.124	0.122	0.116	0.123	0.127	0.115	0.124	0.121	0.11	0.116	0.12
4731	0.303	0.281	0.234	0.261	0.321	0.308	0.219	0.331	0.261	0.385	0.433	0.365			0.305	0.316	0.272	0.149	0.173	0.2	0.272	0.38	0.419	0.257	0.282		0.124	0.122	0.116	0.123	0.126	0.115	0.124	0.121	0.11	0.116	0.12
4743	0.304	0.275	0.237	0.263	0.316	0.311	0.211	0.337	0.26	0.385	0.436	0.355			0.305	0.316	0.272	0.149	0.172	0.2	0.265	0.376	0.413	0.256	0.284		0.124	0.123	0.116	0.123	0.127	0.115	0.124	0.121	0.11	0.115	0.12
4755	0.297	0.274	0.231	0.258	0.319	0.305	0.213	0.327	0.258	0.384	0.431	0.354			0.303	0.317	0.27	0.149	0.172	0.2	0.264	0.371	0.412	0.257	0.281		0.124	0.123	0.116	0.123	0.127	0.116	0.124	0.121	0.111	0.116	0.12
4767	0.298	0.277	0.23	0.257	0.313	0.304	0.208	0.329	0.258	0.382	0.431	0.355			0.304	0.314	0.271	0.147	0.171	0.198	0.27	0.371	0.416	0.256	0.283		0.124	0.122	0.116	0.123	0.126	0.115	0.124	0.121	0.11	0.117	0.12
4779	0.3	0.27	0.234	0.254	0.314	0.302	0.206	0.322	0.256	0.382	0.431	0.35			0.301	0.314	0.268	0.147	0.169	0.198	0.259	0.378	0.407	0.256	0.28		0.124	0.123	0.116	0.123	0.126	0.115	0.124	0.121	0.111	0.115	0.12
4791	0.295	0.274	0.227	0.254	0.312	0.302	0.205	0.321	0.255	0.382	0.429	0.357			0.299	0.313	0.265	0.145	0.169	0.195	0.264	0.365	0.41	0.255	0.281		0.123	0.122	0.116	0.123	0.126	0.115	0.124	0.121	0.111	0.114	0.12
4803	0.294	0.267	0.226	0.257	0.311	0.306	0.203	0.322	0.254	0.382	0.433	0.348			0.302	0.312	0.268	0.146	0.167	0.196	0.255	0.368	0.404	0.255	0.279		0.124	0.123	0.116	0.123	0.126	0.115	0.124	0.121	0.111	0.115	0.12
4815	0.292	0.266	0.224	0.251	0.313	0.299	0.207	0.316	0.25	0.381	0.426	0.351			0.299	0.312	0.265	0.145	0.166	0.194	0.255	0.36	0.402	0.255	0.278		0.124	0.122	0.116	0.123	0.127	0.115	0.124	0.121	0.111	0.115	0.12
4827	0.288	0.27	0.223	0.253	0.308	0.302	0.2	0.321	0.25	0.38	0.427	0.344			0.298	0.31	0.264	0.144	0.165	0.194	0.25	0.357	0.398	0.254	0.281		0.124	0.123	0.116	0.123	0.126	0.115	0.124	0.121	0.111	0.116	0.12
4839	0.291	0.262	0.224	0.249	0.309	0.297	0.202	0.312	0.248	0.379	0.427	0.343			0.295	0.31	0.261	0.143	0.165	0.193	0.248	0.351	0.396	0.254	0.277		0.124	0.122	0.116	0.123	0.126	0.115	0.124	0.121	0.111	0.117	0.12
4851	0.284	0.261	0.219	0.247	0.305	0.295	0.197	0.314	0.247	0.379	0.424	0.352			0.295	0.311	0.262	0.143	0.164	0.192	0.254	0.35	0.4	0.254	0.277		0.124	0.123	0.116	0.123	0.126	0.115	0.124	0.121	0.111	0.115	0.12
4863	0.285	0.263	0.218	0.251	0.306	0.299	0.195	0.306	0.246	0.378	0.428	0.34			0.296	0.308	0.262	0.142	0.163	0.191	0.243	0.358	0.391	0.254	0.276		0.124	0.123	0.116	0.123	0.127	0.115	0.124	0.121	0.11	0.115	0.12
4875	0.287	0.258	0.221	0.246	0.308	0.293	0.197	0.306	0.244	0.377	0.423	0.346			0.293	0.309	0.26	0.141	0.163	0.19	0.246	0.345	0.393	0.252	0.276		0.124	0.122	0.116	0.123	0.127	0.115	0.124	0.121	0.11	0.115	0.12
4887	0.28	0.26	0.215	0.247	0.303	0.294	0.193	0.31	0.243	0.376	0.425	0.336			0.292	0.306	0.258	0.141	0.161	0.19	0.239	0.348	0.387	0.252	0.277		0.124	0.123	0.116	0.124	0.127	0.115	0.124	0.121	0.11	0.115	0.12
4899	0.28	0.254	0.214	0.242	0.304	0.29	0.197	0.302	0.241	0.376	0.42	0.338			0.292	0.306	0.257	0.141	0.16	0.189	0.237	0.339	0.385	0.253	0.274		0.124	0.123	0.116	0.123	0.127	0.115	0.124	0.121	0.111	0.115	0.12
4911	0.278	0.253	0.212	0.241	0.3	0.29	0.19	0.304	0.24	0.375	0.42	0.335			0.29	0.306	0.256	0.14	0.161	0.188	0.237	0.336	0.384	0.252	0.277		0.124	0.123	0.116	0.123	0.126	0.115	0.124	0.121	0.111	0.115	0.12
4923	0.276	0.257	0.211	0.244	0.299	0.292	0.191	0.297	0.238	0.375	0.421	0.333			0.29	0.304	0.256	0.14	0.159	0.188	0.232	0.337	0.38	0.252	0.273		0.124	0.123	0.116	0.123	0.126	0.115	0.124	0.121	0.111	0.114	0.12
4935	0.278	0.25	0.213	0.239	0.302	0.287	0.187	0.297	0.237	0.374	0.417	0.342			0.288	0.304	0.254	0.139	0.158	0.186	0.239	0.33	0.386	0.251	0.273		0.124	0.122	0.116	0.124	0.127	0.115	0.124	0.121	0.111	0.115	0.12
4947	0.273	0.251	0.208	0.241	0.297	0.289	0.185	0.292	0.236	0.373	0.421	0.33			0.287	0.303	0.254	0.139	0.157	0.186	0.228	0.338	0.375	0.251	0.272		0.124	0.123	0.116	0.123	0.127	0.115	0.124	0.121	0.11	0.115	0.12
4959	0.273	0.245	0.208	0.237	0.299	0.284	0.188	0.291	0.234	0.373	0.417	0.336			0.289	0.302	0.255	0.138	0.157	0.186	0.231	0.324	0.377	0.249	0.272		0.124	0.123	0.116	0.123	0.126	0.115	0.124	0.121	0.111	0.114	0.12
4971	0.269	0.244	0.205	0.236	0.295	0.284	0.183	0.295	0.233	0.372	0.418	0.327			0.285	0.304	0.251	0.138	0.157	0.185	0.224	0.326	0.371	0.249	0.274		0.124	0.122	0.116	0.123	0.126	0.115	0.124	0.121	0.11	0.115	0.12
4983	0.267	0.247	0.203	0.236	0.294	0.284	0.185	0.288	0.231	0.372	0.414	0.326			0.286	0.3	0.252	0.137	0.155	0.184	0.223	0.317	0.369	0.249	0.271		0.124	0.123	0.116	0.124	0.126	0.115	0.124	0.121	0.111	0.115	0.12
4995	0.269	0.242	0.205	0.234	0.296	0.281	0.181	0.289	0.231	0.371	0.412	0.332			0.284	0.302	0.25	0.137	0.156	0.183	0.225	0.316	0.371	0.249	0.272		0.124	0.122	0.116	0.123	0.127	0.115	0.124	0.121	0.111	0.115	0.12
5007	0.264	0.244	0.201	0.235	0.29	0.283	0.179	0.283	0.23	0.37	0.415	0.323			0.281	0.299	0.248	0.136	0.153	0.182	0.219	0.323	0.365	0.249	0.27		0.124	0.123	0.116	0.123	0.126	0.115	0.124	0.121	0.11	0.115	0.12
5019	0.265	0.238	0.201	0.231	0.293	0.279	0.178	0.281	0.228	0.37	0.411	0.331			0.283	0.298	0.249	0.135	0.153	0.181	0.223	0.312	0.369	0.248	0.27		0.124	0.123	0.116	0.123	0.127	0.115	0.123	0.12	0.111	0.115	0.12
5031	0.26	0.238	0.198	0.23	0.289	0.277	0.177	0.282	0.227	0.369	0.413	0.32			0.28	0.3	0.247	0.134	0.154	0.179	0.214	0.314	0.359	0.248	0.27		0.124	0.123	0.116	0.123	0.127	0.115	0.124	0.121	0.111	0.115	0.12
5043	0.26	0.242	0.198	0.232	0.287	0.28	0.181	0.277	0.225	0.369	0.407	0.321			0.281	0.297	0.247	0.135	0.152	0.18	0.214	0.306	0.36	0.247	0.267		0.124	0.123	0.116	0.123	0.126	0.115	0.124	0.121	0.11	0.115	0.12
5055	0.262	0.234	0.201	0.228	0.29	0.275	0.174	0.282	0.225	0.368	0.407	0.32			0.277	0.298	0.243	0.133	0.152	0.178	0.21	0.304	0.355	0.246	0.27		0.124	0.123	0.116	0.123	0.126	0.114	0.123	0.121	0.111	0.114	0.12
5067	0.255	0.238	0.195	0.23	0.285	0.278	0.175	0.274	0.223	0.367	0.409	0.315			0.277	0.295	0.244	0.133	0.15	0.177	0.209	0.303	0.354	0.246	0.266		0.124	0.123	0.116	0.124	0.126	0.115	0.124	0.121	0.111	0.115	0.12
5079	0.257	0.232	0.195	0.226	0.286	0.273	0.172	0.272	0.222	0.367	0.406	0.324			0.279	0.295	0.245	0.133	0.15	0.179	0.215	0.299	0.359	0.246	0.266		0.124	0.123	0.116	0.124	0.126	0.115	0.124	0.121	0.113	0.115	0.121
5091	0.253	0.23	0.192	0.225	0.282	0.272	0.17	0.27	0.221	0.366	0.407	0.312			0.275	0.297	0.243	0.133	0.151	0.177	0.205	0.301	0.349	0.244	0.267		0.124	0.123	0.116	0.124	0.126	0.115	0.124	0.121	0.111	0.115	0.119
5103	0.253	0.234	0.192	0.225	0.282	0.273	0.174	0.267	0.219	0.366	0.404	0.311			0.276	0.293	0.242	0.132	0.149	0.176	0.205	0.293	0.349	0.244	0.264		0.124	0.122	0.116	0.123	0.126	0.115	0.124	0.121	0.111	0.115	0.12
5115	0.256	0.228	0.195	0.222	0.283	0.27	0.169	0.272	0.218	0.365	0.403	0.318			0.274	0.294	0.241	0.132	0.15	0.176	0.202	0.291	0.344	0.244	0.266		0.124	0.122	0.116	0.124	0.126	0.115	0.124	0.121	0.111	0.115	0.119
5127	0.25	0.231	0.189	0.224	0.28	0.273	0.169	0.264	0.217	0.364	0.405	0.309			0.272	0.291	0.239	0.131	0.149	0.174	0.2	0.287	0.343	0.244	0.263		0.124	0.122	0.116	0.123	0.126	0.115	0.124	0.121	0.111	0.115	0.12
5139	0.251	0.224	0.192	0.219	0.281	0.268	0.166	0.265	0.215	0.364	0.401	0.314			0.273	0.29	0.24	0.13	0.148	0.174	0.205	0.286	0.347	0.243	0.263		0.124	0.122	0.116	0.123	0.126	0.115	0.124	0.121	0.111	0.115	0.12
5151	0.245	0.223	0.187	0.218	0.278	0.266	0.165	0.259	0.216	0.363	0.4	0.305			0.271	0.292	0.238	0.13	0.149	0.173	0.197	0.293	0.339	0.243	0.265		0.124	0.122	0.116	0.124	0.126	0.115	0.124	0.121	0.111	0.115	0.12
5163	0.245	0.228	0.186	0.22	0.275	0.269	0.168	0.258	0.213	0.363	0.399	0.303			0.271	0.289	0.238	0.13	0.147	0.174	0.199	0.281	0.34	0.244	0.261		0.123	0.122	0.116	0.123	0.126	0.115	0.124	0.121	0.112	0.115	0.12
5175	0.247	0.222	0.189	0.217	0.278	0.265	0.164	0.263	0.212	0.363	0.397	0.31			0.269	0.289	0.236	0.129	0.147	0.171	0.193	0.281	0.333	0.241	0.262		0.124	0.123	0.116	0.123	0.126	0.115	0.124	0.121	0.111	0.114	0.12
5187	0.242	0.224	0.184	0.218	0.273	0.267	0.164	0.254	0.212	0.362	0.4	0.3			0.267	0.287	0.234	0.129	0.146	0.171	0.192	0.275	0.332	0.242	0.259		0.124	0.122	0.116	0.123	0.126	0.115	0.124	0.121	0.111	0.115	0.12
5199	0.24	0.218	0.182	0.214	0.275	0.262	0.161	0.255	0.21	0.362	0.396	0.308			0.269	0.287	0.236	0.129	0.146	0.171	0.196	0.274	0.335	0.242	0.26		0.124	0.123	0.116	0.124	0.127	0.115	0.124	0.121	0.111	0.115	0.121
5211	0.237	0.219	0.182	0.213	0.268	0.261	0.16	0.249	0.21	0.36	0.399	0.297			0.266	0.288	0.234	0.128	0.145	0.17	0.189	0.28	0.329	0.239	0.258		0.124	0.122	0.116	0.124	0.126	0.115	0.124	0.121	0.111	0.116	0.121
5223	0.238	0.216	0.181	0.212	0.267	0.26	0.16	0.248	0.208	0.36	0.392	0.301			0.267	0.285	0.234	0.128	0.145	0.17	0.191	0.268	0.33	0.24	0.258		0.124	0.122	0.116	0.124	0.126	0.115	0.124	0.121	0.112	0.116	0.12
5235	0.234	0.214	0.179	0.211	0.269	0.259	0.158	0.25	0.208	0.359	0.397	0.294			0.264	0.287	0.232	0.127	0.145	0.168	0.186	0.271	0.324	0.24	0.258		0.123	0.122	0.116	0.123	0.127	0.115	0.124	0.121	0.112	0.115	0.12
5247	0.235	0.219	0.179	0.214	0.264	0.262	0.161	0.244	0.206	0.359	0.393	0.296			0.263	0.284	0.231	0.127	0.144	0.169	0.185	0.264	0.322	0.242	0.257		0.123	0.122	0.116	0.124	0.126	0.115	0.124	0.121	0.111	0.116	0.119
5259	0.235	0.212	0.18	0.209	0.266	0.256	0.156	0.248	0.205	0.358	0.39	0.29			0.262	0.283	0.23	0.127	0.143	0.168	0.183	0.26	0.318	0.239	0.259		0.123	0.122	0.116	0.124	0.127	0.115	0.124	0.121	0.112	0.116	0.12
5271	0.232	0.213	0.176	0.208	0.263	0.255	0.157	0.241	0.204	0.358	0.392	0.29			0.262	0.284	0.23	0.126	0.144	0.167	0.182	0.26	0.317	0.239	0.255		0.124	0.122	0.116	0.123	0.126	0.115	0.124	0.121	0.112	0.116	0.12
5283	0.231	0.21	0.175	0.207	0.262	0.255	0.155	0.241	0.203	0.358	0.389	0.298			0.261	0.282	0.229	0.127	0.143	0.167	0.186	0.257	0.321	0.237	0.256		0.123	0.122	0.116	0.124	0.127	0.115	0.124	0.121	0.111	0.116	0.12
5295	0.229	0.209	0.175	0.205	0.259	0.253	0.154	0.237	0.202	0.357	0.392	0.288			0.259	0.283	0.228	0.126	0.143	0.166	0.179	0.262	0.312	0.237	0.255		0.124	0.122	0.115	0.123	0.126	0.115	0.124	0.12	0.112	0.115	0.12
5307	0.228	0.212	0.174	0.208	0.259	0.256	0.156	0.236	0.2	0.356	0.387	0.285			0.259	0.28	0.227	0.126	0.142	0.166	0.181	0.253	0.314	0.237	0.253		0.124	0.123	0.116	0.123	0.126	0.115	0.123	0.121	0.112	0.117	0.12
5319	0.228	0.206	0.174	0.204	0.263	0.251	0.152	0.239	0.2	0.356	0.386	0.289			0.256	0.279	0.225	0.125	0.142	0.165	0.176	0.254	0.308	0.236	0.256		0.124	0.122	0.116	0.123	0.127	0.115	0.124	0.121	0.111	0.117	0.119
5331	0.225	0.207	0.172	0.206	0.259	0.254	0.153	0.232	0.198	0.354	0.388	0.283			0.256	0.279	0.225	0.125	0.142	0.165	0.175	0.247	0.305	0.237	0.251		0.124	0.122	0.116	0.124	0.126	0.115	0.124	0.121	0.111	0.119	0.119
5343	0.226	0.204	0.174	0.201	0.26	0.249	0.151	0.234	0.198	0.355	0.385	0.29			0.258	0.278	0.226	0.125	0.141	0.165	0.178	0.247	0.31	0.235	0.253		0.124	0.122	0.116	0.123	0.127	0.115	0.124	0.121	0.111	0.118	0.12
5355	0.221	0.203	0.17	0.201	0.256	0.249	0.15	0.228	0.198	0.354	0.387	0.281			0.255	0.28	0.224	0.124	0.142	0.163	0.173	0.253	0.302	0.235	0.25		0.124	0.123	0.116	0.123	0.126	0.115	0.124	0.121	0.111	0.115	0.12
5367	0.22	0.206	0.169	0.203	0.254	0.25	0.152	0.227	0.197	0.354	0.383	0.289			0.255	0.276	0.224	0.125	0.141	0.164	0.174	0.242	0.304	0.234	0.25		0.123	0.122	0.116	0.123	0.126	0.115	0.124	0.121	0.111	0.115	0.119
5379	0.223	0.201	0.172	0.199	0.257	0.247	0.149	0.232	0.195	0.354	0.387	0.278			0.253	0.276	0.222	0.124	0.141	0.163	0.169	0.242	0.297	0.234	0.249		0.124	0.122	0.116	0.124	0.126	0.115	0.124	0.121	0.111	0.115	0.119
5391	0.218	0.2	0.167	0.201	0.253	0.249	0.149	0.224	0.194	0.353	0.38	0.28			0.252	0.277	0.221	0.124	0.14	0.162	0.168	0.236	0.295	0.234	0.248		0.123	0.123	0.116	0.124	0.126	0.115	0.123	0.121	0.112	0.114	0.12
5403	0.216	0.199	0.166	0.196	0.254	0.244	0.147	0.225	0.193	0.352	0.38	0.276			0.253	0.274	0.222	0.124	0.14	0.163	0.171	0.236	0.3	0.232	0.251		0.124	0.123	0.115	0.123	0.126	0.115	0.124	0.121	0.112	0.115	0.12
5415	0.217	0.197	0.167	0.195	0.251	0.244	0.146	0.22	0.193	0.352	0.381	0.274			0.25	0.275	0.22	0.123	0.141	0.161	0.166	0.241	0.292	0.233	0.247		0.124	0.122	0.116	0.123	0.126	0.115	0.124	0.121	0.111	0.115	0.119
5427	0.214	0.199	0.164	0.198	0.25	0.246	0.145	0.219	0.191	0.352	0.378	0.281			0.249	0.272	0.22	0.123	0.139	0.162	0.169	0.231	0.295	0.232	0.248		0.124	0.122	0.116	0.124	0.126	0.115	0.124	0.121	0.111	0.121	0.12
5439	0.214	0.195	0.165	0.194	0.252	0.242	0.145	0.22	0.192	0.351	0.379	0.272			0.248	0.272	0.218	0.122	0.14	0.161	0.164	0.235	0.289	0.231	0.245		0.124	0.123	0.116	0.124	0.126	0.115	0.124	0.121	0.112	0.12	0.12
5451	0.211	0.196	0.163	0.197	0.247	0.245	0.147	0.215	0.189	0.351	0.376	0.279			0.248	0.27	0.218	0.122	0.139	0.16	0.163	0.228	0.286	0.231	0.245		0.124	0.122	0.116	0.123	0.126	0.115	0.124	0.121	0.112	0.114	0.119
5463	0.214	0.192	0.164	0.193	0.246	0.239	0.144	0.218	0.188	0.35	0.378	0.269			0.247	0.27	0.217	0.122	0.139	0.161	0.162	0.225	0.285	0.23	0.245		0.124	0.122	0.116	0.123	0.126	0.115	0.124	0.122	0.111	0.114	0.119
5475	0.209	0.196	0.161	0.191	0.245	0.238	0.144	0.213	0.187	0.35	0.374	0.273			0.246	0.269	0.217	0.122	0.14	0.16	0.16	0.227	0.281	0.23	0.244		0.124	0.122	0.116	0.124	0.126	0.115	0.124	0.121	0.111	0.114	0.12
5487	0.21	0.19	0.163	0.193	0.244	0.242	0.142	0.211	0.187	0.348	0.374	0.265			0.245	0.268	0.216	0.122	0.139	0.16	0.164	0.222	0.287	0.229	0.246		0.124	0.122	0.116	0.123	0.126	0.115	0.123	0.121	0.112	0.114	0.12
5499	0.205	0.191	0.16	0.189	0.248	0.237	0.141	0.208	0.186	0.348	0.374	0.265			0.244	0.27	0.216	0.122	0.139	0.159	0.159	0.228	0.279	0.229	0.242		0.124	0.122	0.116	0.124	0.126	0.115	0.123	0.121	0.112	0.115	0.12
5511	0.203	0.192	0.159	0.19	0.242	0.239	0.143	0.207	0.185	0.349	0.371	0.273			0.246	0.267	0.216	0.122	0.139	0.159	0.159	0.217	0.28	0.228	0.243		0.123	0.122	0.116	0.124	0.126	0.115	0.123	0.121	0.111	0.115	0.12
5523	0.207	0.188	0.161	0.187	0.242	0.235	0.14	0.212	0.184	0.348	0.375	0.263			0.242	0.267	0.214	0.122	0.139	0.16	0.156	0.22	0.274	0.228	0.243		0.124	0.122	0.116	0.123	0.126	0.115	0.124	0.121	0.111	0.114	0.12
5535	0.203	0.189	0.157	0.186	0.238	0.234	0.142	0.205	0.183	0.347	0.369	0.266			0.241	0.265	0.213	0.121	0.139	0.159	0.155	0.214	0.272	0.227	0.24		0.123	0.122	0.116	0.124	0.126	0.115	0.124	0.121	0.111	0.114	0.12
5547	0.203	0.185	0.158	0.188	0.238	0.237	0.139	0.205	0.183	0.347	0.37	0.26			0.243	0.264	0.214	0.121	0.138	0.159	0.156	0.213	0.274	0.226	0.243		0.124	0.122	0.116	0.123	0.127	0.115	0.123	0.121	0.114	0.114	0.119
5559	0.2	0.184	0.156	0.184	0.242	0.233	0.139	0.201	0.181	0.347	0.368	0.259			0.24	0.267	0.212	0.121	0.138	0.158	0.153	0.216	0.269	0.229	0.239		0.124	0.122	0.116	0.124	0.126	0.115	0.123	0.121	0.115	0.114	0.12
5571	0.199	0.188	0.156	0.187	0.237	0.235	0.138	0.2	0.181	0.346	0.368	0.266			0.24	0.263	0.212	0.121	0.139	0.158	0.155	0.21	0.273	0.227	0.24		0.124	0.122	0.116	0.123	0.126	0.115	0.124	0.121	0.111	0.114	0.119
5583	0.198	0.183	0.156	0.183	0.238	0.23	0.137	0.201	0.179	0.346	0.37	0.257			0.238	0.262	0.21	0.121	0.138	0.159	0.151	0.211	0.265	0.226	0.237		0.124	0.122	0.116	0.123	0.126	0.115	0.124	0.121	0.111	0.115	0.12
5595	0.197	0.185	0.154	0.182	0.234	0.229	0.139	0.197	0.178	0.346	0.366	0.263			0.237	0.261	0.21	0.12	0.14	0.157	0.151	0.206	0.266	0.225	0.236		0.123	0.122	0.116	0.123	0.126	0.115	0.124	0.121	0.111	0.114	0.119
5607	0.195	0.18	0.153	0.185	0.235	0.233	0.137	0.202	0.178	0.345	0.367	0.254			0.238	0.26	0.21	0.121	0.139	0.158	0.149	0.205	0.262	0.223	0.239		0.123	0.122	0.116	0.123	0.126	0.115	0.123	0.121	0.111	0.114	0.119
5619	0.194	0.18	0.152	0.18	0.237	0.227	0.137	0.195	0.177	0.344	0.362	0.253			0.236	0.262	0.209	0.121	0.139	0.157	0.149	0.203	0.261	0.223	0.235		0.124	0.122	0.116	0.124	0.126	0.115	0.123	0.121	0.111	0.115	0.12
5631	0.194	0.181	0.152	0.182	0.232	0.23	0.135	0.196	0.176	0.343	0.363	0.251			0.235	0.258	0.208	0.12	0.138	0.157	0.151	0.201	0.264	0.223	0.238		0.123	0.122	0.115	0.124	0.126	0.115	0.124	0.121	0.113	0.115	0.12
5643	0.194	0.178	0.152	0.178	0.232	0.225	0.135	0.192	0.175	0.344	0.363	0.25			0.233	0.258	0.207	0.12	0.137	0.158	0.147	0.207	0.257	0.224	0.233		0.123	0.122	0.116	0.124	0.126	0.115	0.123	0.121	0.118	0.116	0.12
5655	0.191	0.178	0.15	0.177	0.229	0.224	0.135	0.191	0.174	0.344	0.362	0.257			0.233	0.258	0.207	0.12	0.137	0.156	0.148	0.198	0.259	0.222	0.235		0.124	0.122	0.115	0.124	0.126	0.115	0.124	0.121	0.113	0.115	0.12
5667	0.19	0.176	0.15	0.18	0.228	0.227	0.134	0.194	0.174	0.343	0.365	0.249			0.234	0.256	0.207	0.12	0.136	0.156	0.145	0.2	0.252	0.223	0.233		0.124	0.122	0.116	0.125	0.126	0.115	0.123	0.121	0.111	0.115	0.12
5679	0.189	0.174	0.149	0.175	0.229	0.222	0.135	0.188	0.173	0.343	0.36	0.256			0.23	0.259	0.205	0.12	0.136	0.156	0.144	0.195	0.251	0.222	0.232		0.123	0.122	0.116	0.128	0.126	0.115	0.124	0.121	0.111	0.115	0.119
5691	0.188	0.174	0.148	0.176	0.226	0.223	0.134	0.191	0.172	0.342	0.362	0.246			0.23	0.255	0.204	0.12	0.135	0.156	0.144	0.194	0.25	0.22	0.233		0.123	0.122	0.116	0.133	0.126	0.115	0.124	0.121	0.111	0.115	0.119
5703	0.187	0.173	0.148	0.173	0.225	0.221	0.134	0.186	0.172	0.341	0.359	0.244			0.229	0.257	0.204	0.12	0.135	0.156	0.143	0.195	0.248	0.221	0.23		0.123	0.123	0.116	0.132	0.126	0.115	0.123	0.121	0.111	0.115	0.119
5715	0.186	0.175	0.147	0.173	0.224	0.221	0.132	0.187	0.172	0.341	0.358	0.244			0.231	0.253	0.205	0.12	0.136	0.155	0.145	0.191	0.254	0.22	0.233		0.124	0.122	0.116	0.123	0.126	0.115	0.124	0.121	0.112	0.115	0.12
5727	0.188	0.172	0.149	0.175	0.222	0.224	0.132	0.183	0.171	0.34	0.361	0.243			0.227	0.254	0.203	0.12	0.134	0.155	0.141	0.195	0.245	0.22	0.229		0.124	0.122	0.116	0.123	0.126	0.115	0.123	0.121	0.111	0.114	0.12
5739	0.185	0.174	0.146	0.171	0.225	0.22	0.133	0.182	0.17	0.341	0.356	0.249			0.227	0.251	0.202	0.119	0.135	0.154	0.142	0.188	0.247	0.219	0.229		0.123	0.122	0.115	0.123	0.126	0.115	0.124	0.121	0.111	0.115	0.12
5751	0.186	0.17	0.147	0.173	0.221	0.222	0.132	0.185	0.169	0.34	0.359	0.24			0.226	0.251	0.202	0.119	0.134	0.153	0.139	0.189	0.241	0.218	0.228		0.124	0.122	0.116	0.123	0.127	0.115	0.124	0.121	0.111	0.115	0.12
5763	0.183	0.172	0.145	0.17	0.221	0.217	0.133	0.18	0.168	0.34	0.353	0.239			0.225	0.25	0.201	0.12	0.134	0.153	0.139	0.185	0.24	0.217	0.227		0.124	0.122	0.116	0.124	0.126	0.115	0.124	0.121	0.111	0.114	0.12
5775	0.182	0.168	0.145	0.171	0.219	0.216	0.131	0.182	0.168	0.339	0.351	0.242			0.226	0.249	0.201	0.119	0.135	0.152	0.139	0.184	0.241	0.215	0.228		0.123	0.122	0.116	0.124	0.126	0.115	0.123	0.121	0.111	0.115	0.12
5787	0.181	0.167	0.144	0.171	0.217	0.216	0.131	0.178	0.166	0.339	0.356	0.237			0.223	0.251	0.199	0.119	0.134	0.15	0.137	0.186	0.237	0.217	0.225		0.124	0.122	0.116	0.124	0.126	0.115	0.123	0.121	0.112	0.115	0.12
5799	0.179	0.17	0.143	0.168	0.22	0.213	0.13	0.177	0.166	0.339	0.352	0.238			0.223	0.247	0.199	0.119	0.134	0.149	0.14	0.181	0.242	0.217	0.224		0.123	0.122	0.115	0.124	0.126	0.115	0.123	0.121	0.111	0.114	0.119
5811	0.18	0.165	0.144	0.17	0.216	0.216	0.13	0.178	0.165	0.338	0.352	0.234			0.221	0.247	0.198	0.119	0.133	0.147	0.137	0.183	0.234	0.215	0.227		0.123	0.122	0.115	0.124	0.126	0.115	0.124	0.121	0.111	0.114	0.12
5823	0.177	0.165	0.142	0.166	0.218	0.211	0.131	0.175	0.165	0.338	0.352	0.233			0.221	0.249	0.198	0.119	0.133	0.146	0.136	0.179	0.233	0.216	0.223		0.123	0.122	0.115	0.124	0.126	0.115	0.123	0.121	0.112	0.115	0.12
5835	0.177	0.168	0.142	0.165	0.214	0.211	0.129	0.177	0.164	0.338	0.349	0.24			0.22	0.245	0.197	0.119	0.133	0.145	0.135	0.177	0.231	0.214	0.223		0.123	0.122	0.116	0.127	0.126	0.115	0.124	0.121	0.111	0.114	0.119
5847	0.178	0.164	0.142	0.164	0.212	0.209	0.129	0.173	0.163	0.337	0.352	0.231			0.22	0.244	0.197	0.119	0.133	0.143	0.134	0.179	0.229	0.214	0.221		0.123	0.122	0.116	0.132	0.127	0.115	0.123	0.121	0.112	0.114	0.12
5859	0.175	0.164	0.141	0.163	0.214	0.208	0.129	0.172	0.163	0.337	0.347	0.236			0.219	0.243	0.196	0.119	0.133	0.14	0.136	0.175	0.234	0.212	0.22		0.123	0.122	0.116	0.13	0.126	0.115	0.124	0.121	0.111	0.115	0.12
5871	0.174	0.162	0.14	0.166	0.211	0.212	0.128	0.172	0.162	0.336	0.349	0.229			0.219	0.243	0.196	0.119	0.133	0.139	0.133	0.177	0.227	0.212	0.222		0.124	0.122	0.116	0.126	0.126	0.115	0.124	0.121	0.111	0.114	0.12
5883	0.173	0.161	0.14	0.162	0.213	0.207	0.129	0.17	0.162	0.336	0.347	0.228			0.217	0.245	0.196	0.119	0.132	0.137	0.134	0.173	0.229	0.213	0.219		0.123	0.122	0.116	0.124	0.127	0.115	0.123	0.121	0.111	0.114	0.119
5895	0.172	0.163	0.14	0.163	0.21	0.209	0.128	0.174	0.161	0.336	0.346	0.233			0.216	0.242	0.195	0.119	0.132	0.136	0.132	0.173	0.224	0.211	0.22		0.123	0.122	0.116	0.124	0.126	0.115	0.123	0.121	0.111	0.114	0.119
5907	0.173	0.159	0.14	0.16	0.209	0.205	0.128	0.168	0.161	0.335	0.349	0.225			0.215	0.24	0.194	0.119	0.131	0.135	0.132	0.17	0.223	0.211	0.217		0.123	0.122	0.116	0.124	0.126	0.115	0.123	0.121	0.112	0.114	0.119
5919	0.171	0.159	0.138	0.16	0.207	0.204	0.127	0.169	0.16	0.335	0.344	0.229			0.215	0.243	0.194	0.118	0.132	0.134	0.133	0.169	0.226	0.21	0.216		0.123	0.122	0.115	0.123	0.126	0.115	0.124	0.121	0.111	0.114	0.12
5931	0.17	0.161	0.138	0.163	0.206	0.207	0.127	0.166	0.16	0.334	0.347	0.223			0.215	0.239	0.193	0.119	0.132	0.133	0.13	0.172	0.219	0.211	0.218		0.123	0.122	0.116	0.124	0.126	0.115	0.124	0.121	0.111	0.115	0.12
5943	0.172	0.158	0.14	0.159	0.209	0.202	0.127	0.165	0.159	0.334	0.342	0.222			0.212	0.239	0.192	0.118	0.132	0.132	0.132	0.166	0.223	0.211	0.215		0.124	0.122	0.116	0.123	0.127	0.115	0.123	0.121	0.111	0.114	0.12
5955	0.168	0.159	0.137	0.161	0.204	0.205	0.127	0.166	0.158	0.334	0.342	0.227			0.211	0.237	0.191	0.118	0.131	0.131	0.129	0.168	0.216	0.21	0.216		0.123	0.122	0.116	0.124	0.126	0.115	0.123	0.121	0.111	0.114	0.12
5967	0.168	0.156	0.137	0.157	0.205	0.201	0.127	0.163	0.158	0.333	0.346	0.22			0.214	0.237	0.193	0.118	0.131	0.13	0.13	0.164	0.218	0.21	0.213		0.124	0.122	0.116	0.124	0.127	0.115	0.124	0.121	0.111	0.114	0.119
5979	0.166	0.156	0.136	0.157	0.203	0.2	0.126	0.167	0.157	0.333	0.341	0.222			0.21	0.24	0.191	0.118	0.132	0.13	0.129	0.165	0.214	0.209	0.212		0.123	0.122	0.116	0.125	0.126	0.115	0.124	0.121	0.111	0.114	0.12
5991	0.166	0.157	0.136	0.159	0.202	0.203	0.127	0.162	0.156	0.332	0.339	0.217			0.211	0.235	0.191	0.118	0.131	0.13	0.128	0.162	0.213	0.206	0.215		0.123	0.122	0.116	0.125	0.126	0.115	0.123	0.121	0.111	0.114	0.119
6003	0.168	0.155	0.137	0.155	0.203	0.199	0.126	0.163	0.156	0.332	0.341	0.217			0.209	0.234	0.19	0.118	0.131	0.131	0.13	0.162	0.216	0.208	0.211		0.123	0.122	0.115	0.124	0.126	0.115	0.124	0.121	0.111	0.114	0.119
6015	0.164	0.156	0.135	0.157	0.199	0.201	0.126	0.16	0.155	0.332	0.339	0.224			0.208	0.233	0.188	0.118	0.131	0.133	0.127	0.166	0.21	0.207	0.212		0.124	0.122	0.116	0.125	0.127	0.115	0.123	0.121	0.111	0.114	0.119
6027	0.166	0.153	0.136	0.154	0.199	0.197	0.126	0.16	0.155	0.331	0.34	0.214			0.21	0.232	0.19	0.118	0.131	0.135	0.128	0.161	0.212	0.205	0.212		0.123	0.122	0.116	0.124	0.126	0.115	0.124	0.121	0.111	0.114	0.12
6039	0.163	0.152	0.134	0.154	0.197	0.196	0.126	0.163	0.154	0.331	0.337	0.213			0.207	0.235	0.188	0.118	0.131	0.136	0.127	0.16	0.207	0.206	0.209		0.123	0.122	0.116	0.123	0.126	0.115	0.123	0.121	0.111	0.114	0.119
6051	0.162	0.155	0.134	0.155	0.197	0.197	0.125	0.158	0.154	0.331	0.337	0.219			0.207	0.231	0.188	0.118	0.131	0.136	0.126	0.159	0.206	0.204	0.21		0.123	0.122	0.116	0.124	0.126	0.115	0.123	0.121	0.111	0.114	0.12
6063	0.163	0.151	0.134	0.152	0.199	0.194	0.125	0.159	0.153	0.33	0.339	0.212			0.205	0.231	0.188	0.118	0.13	0.134	0.127	0.158	0.21	0.205	0.207		0.123	0.122	0.116	0.124	0.126	0.115	0.123	0.121	0.111	0.114	0.119
6075	0.161	0.151	0.133	0.154	0.195	0.197	0.125	0.157	0.152	0.33	0.335	0.216			0.205	0.232	0.187	0.118	0.13	0.132	0.126	0.161	0.204	0.204	0.207		0.124	0.122	0.116	0.123	0.126	0.115	0.123	0.121	0.112	0.114	0.12
6087	0.16	0.15	0.133	0.151	0.196	0.193	0.125	0.156	0.152	0.329	0.338	0.21			0.205	0.229	0.187	0.118	0.13	0.129	0.126	0.156	0.206	0.203	0.207		0.124	0.122	0.116	0.123	0.126	0.115	0.124	0.121	0.111	0.114	0.119
6099	0.161	0.15	0.133	0.15	0.193	0.192	0.125	0.157	0.151	0.329	0.335	0.21			0.203	0.231	0.186	0.118	0.131	0.124	0.125	0.157	0.202	0.204	0.206		0.123	0.122	0.116	0.123	0.126	0.115	0.123	0.121	0.111	0.114	0.12
6111	0.159	0.15	0.132	0.152	0.193	0.194	0.125	0.155	0.151	0.329	0.334	0.209			0.202	0.227	0.185	0.118	0.13	0.124	0.125	0.155	0.201	0.203	0.208		0.123	0.122	0.116	0.124	0.126	0.115	0.123	0.121	0.111	0.114	0.119
6123	0.159	0.149	0.133	0.149	0.195	0.191	0.124	0.156	0.152	0.328	0.333	0.207			0.203	0.226	0.185	0.118	0.13	0.124	0.124	0.154	0.2	0.203	0.204		0.123	0.122	0.116	0.124	0.127	0.115	0.123	0.121	0.111	0.114	0.119
6135	0.157	0.149	0.131	0.151	0.191	0.193	0.125	0.153	0.15	0.328	0.332	0.213			0.201	0.226	0.184	0.118	0.13	0.124	0.124	0.154	0.198	0.201	0.205		0.124	0.122	0.116	0.124	0.126	0.115	0.123	0.122	0.111	0.114	0.12
6147	0.156	0.148	0.131	0.148	0.191	0.189	0.124	0.153	0.15	0.328	0.334	0.205			0.202	0.225	0.185	0.118	0.13	0.124	0.125	0.152	0.203	0.201	0.203		0.123	0.122	0.115	0.124	0.126	0.115	0.123	0.121	0.111	0.114	0.12
6159	0.157	0.147	0.132	0.148	0.189	0.188	0.124	0.152	0.149	0.327	0.33	0.21			0.199	0.227	0.183	0.118	0.13	0.125	0.123	0.155	0.196	0.201	0.202		0.123	0.122	0.116	0.125	0.126	0.115	0.123	0.122	0.111	0.114	0.119
6171	0.155	0.148	0.13	0.149	0.189	0.191	0.124	0.152	0.149	0.327	0.333	0.204			0.198	0.223	0.182	0.118	0.13	0.126	0.124	0.151	0.197	0.2	0.204		0.123	0.121	0.115	0.125	0.126	0.115	0.123	0.121	0.111	0.114	0.12
6183	0.156	0.146	0.131	0.146	0.189	0.187	0.124	0.154	0.148	0.326	0.329	0.203			0.2	0.223	0.183	0.118	0.13	0.126	0.122	0.151	0.194	0.201	0.201		0.123	0.121	0.115	0.125	0.127	0.115	0.123	0.122	0.111	0.114	0.119
6195	0.153	0.145	0.13	0.147	0.187	0.187	0.123	0.151	0.147	0.326	0.33	0.203			0.197	0.226	0.182	0.118	0.129	0.126	0.122	0.149	0.193	0.2	0.204		0.123	0.122	0.116	0.126	0.126	0.115	0.123	0.122	0.111	0.114	0.119
6207	0.153	0.147	0.13	0.145	0.187	0.184	0.124	0.152	0.147	0.325	0.329	0.201			0.197	0.221	0.182	0.118	0.13	0.126	0.123	0.148	0.195	0.199	0.199		0.123	0.121	0.116	0.125	0.127	0.115	0.124	0.122	0.111	0.114	0.119
6219	0.154	0.144	0.13	0.145	0.186	0.184	0.123	0.15	0.146	0.326	0.328	0.207			0.195	0.22	0.18	0.118	0.13	0.125	0.122	0.15	0.19	0.199	0.199		0.123	0.122	0.116	0.124	0.126	0.115	0.123	0.122	0.111	0.114	0.119
6231	0.152	0.145	0.129	0.146	0.184	0.187	0.123	0.15	0.147	0.325	0.33	0.2			0.195	0.219	0.181	0.118	0.13	0.125	0.122	0.147	0.194	0.198	0.199		0.123	0.121	0.116	0.124	0.126	0.115	0.123	0.122	0.111	0.113	0.119
6243	0.151	0.143	0.129	0.144	0.187	0.183	0.124	0.15	0.146	0.324	0.325	0.2			0.195	0.219	0.18	0.117	0.13	0.124	0.121	0.148	0.188	0.197	0.197		0.123	0.122	0.116	0.123	0.126	0.115	0.123	0.122	0.111	0.114	0.119
6255	0.151	0.143	0.129	0.145	0.183	0.185	0.124	0.148	0.146	0.324	0.326	0.197			0.193	0.22	0.179	0.118	0.13	0.124	0.121	0.146	0.189	0.197	0.2		0.123	0.122	0.116	0.124	0.126	0.115	0.123	0.122	0.111	0.114	0.119
6267	0.15	0.143	0.128	0.143	0.185	0.181	0.123	0.15	0.145	0.324	0.325	0.197			0.194	0.217	0.18	0.118	0.13	0.124	0.121	0.145	0.186	0.197	0.196		0.123	0.122	0.116	0.124	0.126	0.115	0.123	0.122	0.111	0.114	0.119
6279	0.152	0.141	0.129	0.142	0.181	0.18	0.123	0.147	0.144	0.324	0.324	0.202			0.191	0.217	0.178	0.117	0.13	0.124	0.12	0.145	0.185	0.196	0.197		0.123	0.122	0.115	0.124	0.126	0.115	0.123	0.122	0.112	0.114	0.119
6291	0.149	0.142	0.127	0.142	0.18	0.18	0.123	0.148	0.144	0.323	0.327	0.194			0.19	0.215	0.178	0.118	0.13	0.125	0.121	0.144	0.189	0.195	0.194		0.123	0.121	0.115	0.124	0.127	0.115	0.123	0.121	0.111	0.114	0.119
6303	0.148	0.141	0.127	0.141	0.182	0.18	0.123	0.147	0.144	0.323	0.323	0.197			0.191	0.215	0.177	0.118	0.13	0.124	0.12	0.146	0.183	0.196	0.194		0.123	0.121	0.115	0.124	0.126	0.115	0.123	0.121	0.111	0.114	0.119
6315	0.147	0.14	0.127	0.143	0.179	0.183	0.123	0.146	0.144	0.322	0.323	0.196			0.189	0.216	0.177	0.118	0.13	0.125	0.121	0.143	0.185	0.195	0.196		0.123	0.122	0.115	0.124	0.126	0.115	0.123	0.122	0.111	0.114	0.12
6327	0.147	0.141	0.127	0.14	0.179	0.178	0.123	0.147	0.143	0.322	0.325	0.192			0.188	0.213	0.177	0.117	0.129	0.124	0.12	0.144	0.181	0.194	0.193		0.124	0.122	0.116	0.125	0.126	0.115	0.124	0.121	0.111	0.114	0.12
6339	0.148	0.139	0.127	0.14	0.177	0.177	0.123	0.145	0.143	0.322	0.321	0.198			0.188	0.213	0.177	0.117	0.13	0.124	0.12	0.142	0.179	0.194	0.193		0.123	0.122	0.115	0.125	0.126	0.115	0.123	0.121	0.111	0.114	0.119
6351	0.146	0.139	0.126	0.139	0.177	0.176	0.123	0.146	0.143	0.321	0.325	0.191			0.187	0.215	0.176	0.117	0.129	0.125	0.12	0.142	0.18	0.193	0.191		0.123	0.121	0.116	0.125	0.126	0.115	0.123	0.121	0.111	0.114	0.12
6363	0.145	0.14	0.126	0.139	0.176	0.175	0.123	0.144	0.142	0.321	0.321	0.192			0.186	0.211	0.175	0.118	0.13	0.125	0.119	0.142	0.178	0.194	0.19		0.123	0.121	0.116	0.126	0.126	0.115	0.123	0.121	0.111	0.114	0.119
6375	0.146	0.138	0.127	0.14	0.176	0.178	0.123	0.144	0.142	0.32	0.32	0.189			0.186	0.21	0.175	0.118	0.13	0.126	0.12	0.141	0.181	0.193	0.193		0.123	0.121	0.116	0.125	0.126	0.115	0.123	0.121	0.111	0.114	0.119
6387	0.144	0.138	0.126	0.138	0.178	0.174	0.123	0.143	0.141	0.32	0.32	0.188			0.185	0.213	0.175	0.117	0.13	0.126	0.119	0.142	0.176	0.193	0.19		0.123	0.122	0.115	0.125	0.126	0.115	0.124	0.121	0.111	0.114	0.12
6399	0.144	0.139	0.126	0.139	0.174	0.175	0.123	0.143	0.141	0.32	0.318	0.194			0.186	0.209	0.175	0.117	0.129	0.126	0.119	0.14	0.176	0.19	0.19		0.123	0.122	0.116	0.125	0.126	0.115	0.123	0.121	0.111	0.114	0.119
6411	0.145	0.137	0.126	0.137	0.173	0.172	0.123	0.145	0.141	0.319	0.32	0.186			0.183	0.212	0.174	0.117	0.129	0.126	0.119	0.139	0.173	0.19	0.191		0.123	0.122	0.116	0.123	0.126	0.115	0.123	0.121	0.112	0.114	0.12
6423	0.143	0.138	0.125	0.137	0.173	0.172	0.122	0.142	0.14	0.319	0.316	0.186			0.183	0.208	0.174	0.118	0.13	0.126	0.119	0.139	0.172	0.19	0.187		0.123	0.122	0.116	0.124	0.126	0.115	0.123	0.121	0.111	0.114	0.119
6435	0.144	0.136	0.126	0.138	0.172	0.175	0.122	0.143	0.14	0.319	0.316	0.185			0.182	0.207	0.173	0.117	0.129	0.125	0.119	0.138	0.175	0.189	0.19		0.123	0.122	0.116	0.123	0.126	0.115	0.123	0.121	0.111	0.114	0.119
6447	0.143	0.137	0.125	0.136	0.173	0.171	0.123	0.141	0.14	0.318	0.318	0.184			0.181	0.206	0.172	0.117	0.129	0.125	0.119	0.14	0.171	0.189	0.186		0.123	0.122	0.115	0.123	0.126	0.115	0.123	0.121	0.111	0.114	0.119
6459	0.143	0.135	0.125	0.137	0.171	0.172	0.122	0.141	0.14	0.318	0.315	0.189			0.183	0.206	0.172	0.117	0.129	0.125	0.119	0.138	0.172	0.188	0.186		0.123	0.121	0.116	0.123	0.126	0.115	0.123	0.121	0.111	0.114	0.119
6471	0.141	0.135	0.124	0.135	0.17	0.169	0.122	0.142	0.139	0.317	0.317	0.181			0.18	0.207	0.172	0.117	0.129	0.124	0.119	0.138	0.169	0.188	0.186		0.123	0.121	0.116	0.123	0.126	0.115	0.123	0.121	0.111	0.114	0.119
6483	0.141	0.136	0.124	0.135	0.168	0.168	0.123	0.14	0.139	0.317	0.313	0.184			0.18	0.204	0.171	0.117	0.129	0.124	0.118	0.137	0.168	0.189	0.184		0.123	0.122	0.116	0.123	0.126	0.115	0.123	0.121	0.111	0.114	0.12
6495	0.142	0.135	0.125	0.136	0.168	0.17	0.122	0.141	0.138	0.317	0.312	0.18			0.179	0.204	0.171	0.117	0.129	0.124	0.118	0.137	0.168	0.186	0.187		0.123	0.122	0.116	0.124	0.126	0.115	0.123	0.121	0.111	0.113	0.12
6507	0.14	0.135	0.124	0.134	0.17	0.167	0.122	0.139	0.138	0.316	0.312	0.18			0.178	0.203	0.171	0.117	0.129	0.124	0.118	0.137	0.166	0.188	0.183		0.123	0.121	0.116	0.123	0.126	0.116	0.123	0.121	0.111	0.114	0.12
6519	0.14	0.134	0.124	0.135	0.167	0.169	0.122	0.139	0.138	0.316	0.312	0.179			0.179	0.203	0.171	0.117	0.129	0.124	0.118	0.136	0.169	0.186	0.186		0.123	0.122	0.116	0.124	0.126	0.115	0.123	0.121	0.111	0.114	0.12
6531	0.14	0.134	0.123	0.134	0.166	0.165	0.122	0.139	0.137	0.316	0.313	0.178			0.177	0.203	0.169	0.117	0.129	0.124	0.118	0.137	0.162	0.187	0.182		0.123	0.121	0.116	0.125	0.127	0.115	0.123	0.121	0.111	0.114	0.119
6543	0.139	0.134	0.123	0.133	0.165	0.165	0.122	0.138	0.138	0.315	0.31	0.182			0.176	0.2	0.169	0.117	0.129	0.124	0.118	0.135	0.162	0.185	0.183		0.123	0.121	0.115	0.125	0.127	0.115	0.123	0.121	0.111	0.114	0.119
6555	0.14	0.133	0.124	0.134	0.164	0.167	0.122	0.14	0.137	0.315	0.312	0.177			0.177	0.2	0.169	0.117	0.129	0.124	0.118	0.135	0.158	0.185	0.181		0.123	0.122	0.116	0.125	0.127	0.115	0.123	0.121	0.111	0.115	0.119
6567	0.138	0.133	0.123	0.132	0.165	0.164	0.122	0.138	0.137	0.315	0.309	0.182			0.175	0.202	0.169	0.117	0.129	0.124	0.118	0.134	0.156	0.184	0.18		0.123	0.121	0.116	0.125	0.127	0.115	0.123	0.121	0.111	0.114	0.119
6579	0.138	0.134	0.123	0.133	0.163	0.166	0.122	0.138	0.137	0.314	0.312	0.176			0.175	0.199	0.168	0.117	0.129	0.124	0.118	0.134	0.157	0.184	0.181		0.123	0.122	0.116	0.125	0.126	0.115	0.123	0.121	0.111	0.114	0.119
6591	0.138	0.133	0.123	0.132	0.163	0.162	0.122	0.137	0.136	0.314	0.306	0.176			0.174	0.199	0.168	0.117	0.129	0.124	0.118	0.135	0.154	0.183	0.179		0.124	0.122	0.116	0.125	0.126	0.115	0.124	0.121	0.111	0.114	0.119
6603	0.137	0.132	0.123	0.131	0.161	0.162	0.122	0.137	0.136	0.314	0.307	0.176			0.173	0.2	0.167	0.117	0.129	0.124	0.118	0.134	0.155	0.182	0.181		0.123	0.122	0.116	0.126	0.127	0.115	0.124	0.121	0.111	0.114	0.119
6615	0.137	0.133	0.123	0.132	0.161	0.163	0.122	0.138	0.136	0.313	0.31	0.173			0.174	0.197	0.167	0.117	0.129	0.124	0.117	0.134	0.152	0.182	0.177		0.123	0.121	0.116	0.126	0.126	0.115	0.123	0.121	0.111	0.114	0.119
6627	0.138	0.132	0.123	0.131	0.163	0.161	0.122	0.137	0.136	0.313	0.305	0.177			0.172	0.198	0.167	0.117	0.129	0.124	0.117	0.133	0.151	0.181	0.177		0.123	0.121	0.116	0.124	0.126	0.115	0.123	0.121	0.111	0.114	0.119
6639	0.137	0.132	0.122	0.132	0.16	0.162	0.122	0.137	0.135	0.313	0.307	0.172			0.171	0.196	0.166	0.117	0.128	0.124	0.118	0.133	0.153	0.181	0.18		0.123	0.122	0.116	0.124	0.126	0.116	0.123	0.121	0.111	0.114	0.119
6651	0.137	0.131	0.123	0.13	0.16	0.159	0.122	0.136	0.135	0.312	0.304	0.171			0.171	0.195	0.166	0.117	0.129	0.124	0.117	0.133	0.15	0.181	0.176		0.123	0.121	0.116	0.123	0.126	0.115	0.123	0.121	0.111	0.115	0.119
6663	0.136	0.131	0.123	0.13	0.159	0.159	0.122	0.136	0.135	0.312	0.303	0.173			0.169	0.194	0.165	0.117	0.129	0.124	0.117	0.132	0.152	0.18	0.178		0.123	0.121	0.116	0.123	0.126	0.115	0.124	0.121	0.111	0.115	0.12
6675	0.136	0.131	0.123	0.13	0.159	0.159	0.122	0.136	0.135	0.311	0.304	0.17			0.171	0.194	0.166	0.117	0.128	0.124	0.117	0.133	0.148	0.18	0.175		0.123	0.121	0.116	0.123	0.126	0.116	0.123	0.121	0.111	0.114	0.119
6687	0.135	0.13	0.122	0.13	0.16	0.158	0.122	0.136	0.135	0.311	0.303	0.173			0.169	0.194	0.165	0.117	0.129	0.124	0.118	0.132	0.15	0.179	0.174		0.123	0.121	0.116	0.124	0.126	0.115	0.123	0.121	0.111	0.114	0.12
6699	0.134	0.131	0.122	0.13	0.157	0.159	0.122	0.136	0.134	0.311	0.303	0.169			0.168	0.192	0.165	0.117	0.129	0.124	0.117	0.131	0.147	0.178	0.176		0.123	0.121	0.116	0.124	0.126	0.116	0.123	0.121	0.111	0.114	0.119
6711	0.135	0.13	0.122	0.129	0.158	0.157	0.122	0.135	0.134	0.31	0.302	0.17			0.167	0.192	0.163	0.117	0.129	0.124	0.117	0.131	0.146	0.179	0.173		0.123	0.121	0.116	0.123	0.126	0.116	0.123	0.121	0.111	0.114	0.12
6723	0.134	0.13	0.121	0.129	0.156	0.156	0.122	0.135	0.134	0.31	0.302	0.167			0.166	0.191	0.163	0.117	0.129	0.124	0.117	0.131	0.148	0.177	0.176		0.123	0.121	0.116	0.124	0.126	0.115	0.124	0.121	0.111	0.114	0.119
6735	0.134	0.129	0.122	0.128	0.156	0.155	0.122	0.135	0.134	0.31	0.299	0.167			0.167	0.19	0.163	0.117	0.128	0.124	0.117	0.132	0.145	0.178	0.172		0.123	0.121	0.116	0.123	0.126	0.115	0.123	0.121	0.111	0.114	0.119
6747	0.133	0.129	0.121	0.128	0.156	0.155	0.122	0.134	0.134	0.309	0.299	0.168			0.165	0.191	0.163	0.117	0.129	0.124	0.117	0.131	0.145	0.176	0.175		0.123	0.121	0.116	0.124	0.126	0.115	0.124	0.121	0.111	0.114	0.119
6759	0.133	0.129	0.122	0.129	0.154	0.158	0.122	0.135	0.133	0.309	0.301	0.165			0.167	0.19	0.163	0.117	0.129	0.124	0.117	0.131	0.144	0.178	0.172		0.123	0.122	0.116	0.124	0.127	0.115	0.123	0.121	0.111	0.114	0.119
6771	0.133	0.129	0.121	0.128	0.155	0.154	0.122	0.134	0.133	0.309	0.298	0.17			0.164	0.19	0.162	0.117	0.129	0.124	0.117	0.13	0.143	0.176	0.171		0.123	0.121	0.116	0.124	0.127	0.115	0.124	0.121	0.111	0.114	0.119
6783	0.132	0.13	0.122	0.128	0.153	0.155	0.122	0.135	0.133	0.308	0.299	0.164			0.164	0.188	0.162	0.117	0.129	0.124	0.117	0.13	0.144	0.175	0.172		0.123	0.121	0.116	0.124	0.127	0.115	0.124	0.121	0.111	0.114	0.119
6795	0.132	0.128	0.121	0.127	0.152	0.153	0.122	0.134	0.133	0.308	0.297	0.164			0.165	0.188	0.162	0.117	0.128	0.124	0.117	0.13	0.142	0.175	0.17		0.123	0.122	0.116	0.124	0.126	0.115	0.123	0.121	0.111	0.114	0.12
6807	0.132	0.128	0.121	0.127	0.152	0.153	0.122	0.134	0.133	0.308	0.297	0.165			0.162	0.189	0.161	0.117	0.129	0.124	0.117	0.13	0.144	0.173	0.172		0.123	0.121	0.116	0.124	0.126	0.115	0.123	0.121	0.111	0.114	0.119
6819	0.131	0.128	0.121	0.128	0.151	0.154	0.122	0.134	0.132	0.307	0.297	0.163			0.163	0.187	0.161	0.117	0.129	0.124	0.117	0.13	0.14	0.173	0.169		0.123	0.122	0.116	0.124	0.126	0.115	0.123	0.121	0.111	0.113	0.119
6831	0.131	0.128	0.121	0.127	0.154	0.151	0.122	0.133	0.133	0.307	0.295	0.167			0.161	0.188	0.16	0.117	0.128	0.124	0.117	0.129	0.141	0.173	0.17		0.123	0.122	0.116	0.124	0.126	0.115	0.123	0.121	0.111	0.114	0.119
6843	0.131	0.128	0.12	0.127	0.152	0.153	0.122	0.134	0.132	0.306	0.297	0.162			0.16	0.184	0.159	0.117	0.129	0.124	0.117	0.13	0.139	0.172	0.168		0.123	0.121	0.116	0.123	0.126	0.115	0.123	0.121	0.111	0.114	0.119
6855	0.131	0.128	0.121	0.126	0.152	0.151	0.122	0.133	0.132	0.306	0.293	0.163			0.161	0.184	0.16	0.117	0.128	0.124	0.117	0.129	0.14	0.172	0.168		0.123	0.122	0.116	0.124	0.126	0.115	0.123	0.121	0.111	0.114	0.12
6867	0.13	0.127	0.121	0.126	0.15	0.15	0.122	0.133	0.132	0.306	0.293	0.161			0.159	0.186	0.159	0.117	0.128	0.124	0.117	0.129	0.141	0.172	0.17		0.123	0.121	0.116	0.124	0.126	0.115	0.123	0.121	0.111	0.114	0.119
6879	0.13	0.128	0.121	0.127	0.15	0.151	0.122	0.133	0.132	0.306	0.293	0.16			0.161	0.183	0.159	0.117	0.128	0.124	0.117	0.13	0.138	0.172	0.167		0.123	0.121	0.116	0.124	0.126	0.115	0.123	0.121	0.112	0.114	0.12
6891	0.131	0.127	0.121	0.126	0.151	0.149	0.122	0.133	0.132	0.305	0.291	0.164			0.159	0.185	0.158	0.117	0.128	0.124	0.117	0.129	0.139	0.17	0.167		0.123	0.122	0.116	0.123	0.126	0.115	0.123	0.121	0.111	0.114	0.119
6903	0.13	0.128	0.121	0.126	0.149	0.151	0.122	0.133	0.132	0.305	0.292	0.159			0.158	0.182	0.158	0.117	0.128	0.124	0.117	0.129	0.137	0.17	0.168		0.123	0.121	0.116	0.124	0.126	0.115	0.123	0.121	0.111	0.114	0.119
6915	0.13	0.127	0.12	0.126	0.149	0.148	0.122	0.133	0.132	0.305	0.291	0.159			0.159	0.181	0.157	0.117	0.128	0.124	0.117	0.129	0.137	0.171	0.165		0.123	0.121	0.116	0.123	0.126	0.115	0.123	0.121	0.111	0.114	0.119
6927	0.13	0.127	0.12	0.125	0.147	0.148	0.122	0.133	0.132	0.305	0.291	0.162			0.157	0.182	0.157	0.117	0.129	0.124	0.117	0.128	0.136	0.17	0.166		0.123	0.121	0.116	0.123	0.126	0.115	0.123	0.121	0.112	0.113	0.119
6939	0.13	0.127	0.121	0.126	0.146	0.148	0.122	0.132	0.131	0.304	0.292	0.158			0.157	0.18	0.157	0.117	0.129	0.124	0.117	0.128	0.136	0.169	0.164		0.123	0.121	0.117	0.123	0.127	0.115	0.123	0.121	0.111	0.114	0.119
6951	0.129	0.127	0.12	0.125	0.148	0.147	0.122	0.132	0.131	0.304	0.289	0.161			0.155	0.179	0.157	0.117	0.129	0.124	0.117	0.129	0.137	0.169	0.164		0.123	0.121	0.116	0.123	0.127	0.116	0.124	0.121	0.111	0.113	0.119
6963	0.128	0.127	0.12	0.126	0.146	0.148	0.122	0.132	0.132	0.303	0.292	0.157			0.155	0.179	0.156	0.117	0.128	0.124	0.117	0.129	0.135	0.169	0.166		0.123	0.121	0.116	0.123	0.126	0.115	0.124	0.121	0.111	0.114	0.119
6975	0.129	0.126	0.121	0.125	0.147	0.146	0.122	0.132	0.131	0.303	0.287	0.157			0.155	0.178	0.156	0.117	0.128	0.124	0.117	0.128	0.135	0.168	0.163		0.123	0.121	0.116	0.123	0.126	0.115	0.124	0.121	0.111	0.114	0.119
6987	0.128	0.126	0.121	0.125	0.145	0.146	0.122	0.132	0.131	0.302	0.288	0.157			0.154	0.18	0.155	0.117	0.128	0.124	0.117	0.128	0.134	0.167	0.166		0.123	0.121	0.116	0.123	0.126	0.116	0.123	0.121	0.111	0.114	0.119
6999	0.128	0.127	0.121	0.124	0.145	0.145	0.122	0.132	0.131	0.302	0.289	0.155			0.153	0.177	0.155	0.117	0.128	0.124	0.117	0.128	0.134	0.167	0.162		0.123	0.121	0.116	0.123	0.126	0.116	0.123	0.121	0.111	0.114	0.119
7011	0.128	0.126	0.121	0.124	0.146	0.145	0.122	0.132	0.131	0.302	0.286	0.159			0.154	0.176	0.155	0.117	0.128	0.124	0.117	0.128	0.135	0.166	0.162		0.123	0.121	0.116	0.123	0.126	0.116	0.123	0.121	0.111	0.114	0.119
7023	0.128	0.126	0.12	0.125	0.144	0.147	0.122	0.132	0.131	0.302	0.288	0.154			0.152	0.178	0.154	0.117	0.128	0.124	0.117	0.129	0.133	0.166	0.161		0.123	0.121	0.116	0.123	0.126	0.116	0.123	0.121	0.111	0.114	0.119
7035	0.128	0.126	0.12	0.124	0.146	0.144	0.122	0.131	0.131	0.301	0.284	0.155			0.152	0.175	0.154	0.117	0.128	0.124	0.117	0.128	0.133	0.166	0.16		0.123	0.121	0.116	0.123	0.126	0.116	0.123	0.121	0.111	0.114	0.119
7047	0.128	0.126	0.12	0.124	0.144	0.145	0.122	0.132	0.131	0.301	0.284	0.153			0.151	0.175	0.154	0.117	0.128	0.124	0.117	0.128	0.132	0.165	0.163		0.123	0.121	0.116	0.123	0.126	0.115	0.123	0.121	0.111	0.114	0.119
7059	0.128	0.126	0.12	0.123	0.143	0.143	0.122	0.132	0.131	0.3	0.284	0.152			0.151	0.174	0.153	0.117	0.128	0.124	0.117	0.128	0.132	0.166	0.16		0.123	0.121	0.116	0.123	0.126	0.115	0.124	0.121	0.111	0.114	0.119
7071	0.128	0.126	0.12	0.124	0.143	0.143	0.122	0.132	0.13	0.3	0.282	0.155			0.152	0.174	0.153	0.117	0.128	0.124	0.117	0.128	0.132	0.164	0.161		0.123	0.122	0.116	0.123	0.126	0.115	0.123	0.121	0.111	0.114	0.119
7083	0.127	0.126	0.12	0.124	0.142	0.144	0.122	0.132	0.131	0.3	0.285	0.152			0.15	0.175	0.153	0.117	0.128	0.124	0.117	0.128	0.131	0.164	0.159		0.123	0.121	0.115	0.123	0.126	0.115	0.124	0.121	0.111	0.114	0.119
7095	0.127	0.126	0.12	0.124	0.144	0.142	0.122	0.132	0.13	0.3	0.28	0.152			0.15	0.172	0.152	0.117	0.128	0.124	0.117	0.127	0.132	0.164	0.158		0.123	0.121	0.116	0.122	0.127	0.115	0.124	0.121	0.111	0.114	0.119
7107	0.127	0.126	0.12	0.124	0.142	0.143	0.122	0.132	0.13	0.299	0.28	0.151			0.149	0.174	0.152	0.117	0.128	0.124	0.117	0.128	0.131	0.163	0.161		0.123	0.121	0.115	0.123	0.126	0.115	0.124	0.121	0.111	0.114	0.12
7119	0.127	0.126	0.121	0.124	0.142	0.141	0.122	0.132	0.13	0.299	0.281	0.15			0.148	0.172	0.152	0.117	0.128	0.124	0.117	0.127	0.131	0.163	0.158		0.123	0.121	0.116	0.122	0.127	0.115	0.124	0.121	0.111	0.114	0.119
7131	0.127	0.125	0.12	0.124	0.141	0.141	0.122	0.132	0.13	0.299	0.279	0.153			0.148	0.17	0.151	0.117	0.129	0.124	0.117	0.128	0.13	0.162	0.157		0.123	0.121	0.116	0.123	0.126	0.116	0.123	0.121	0.111	0.114	0.119
7143	0.126	0.126	0.12	0.123	0.141	0.142	0.122	0.131	0.13	0.298	0.28	0.149			0.147	0.172	0.151	0.117	0.128	0.124	0.117	0.127	0.129	0.161	0.159		0.123	0.121	0.116	0.123	0.126	0.116	0.123	0.121	0.111	0.114	0.12
7155	0.127	0.125	0.12	0.123	0.142	0.14	0.122	0.131	0.13	0.297	0.277	0.149			0.148	0.17	0.151	0.117	0.128	0.124	0.117	0.127	0.13	0.162	0.157		0.123	0.121	0.116	0.123	0.126	0.115	0.123	0.121	0.111	0.114	0.119
7167	0.126	0.125	0.12	0.123	0.14	0.141	0.122	0.131	0.13	0.298	0.277	0.15			0.147	0.172	0.151	0.117	0.128	0.124	0.117	0.127	0.129	0.161	0.158		0.123	0.121	0.116	0.123	0.126	0.115	0.123	0.121	0.111	0.114	0.119
7179	0.126	0.125	0.12	0.123	0.141	0.14	0.122	0.131	0.13	0.297	0.278	0.148			0.146	0.169	0.15	0.117	0.128	0.124	0.117	0.127	0.13	0.161	0.155		0.123	0.121	0.116	0.123	0.127	0.115	0.123	0.121	0.111	0.114	0.119
7191	0.126	0.125	0.12	0.123	0.14	0.14	0.122	0.131	0.13	0.296	0.276	0.151			0.147	0.169	0.15	0.117	0.129	0.124	0.117	0.128	0.129	0.16	0.156		0.123	0.121	0.116	0.123	0.126	0.115	0.123	0.121	0.111	0.114	0.119
7203	0.126	0.125	0.12	0.123	0.14	0.139	0.122	0.131	0.13	0.296	0.278	0.147			0.145	0.17	0.149	0.117	0.128	0.124	0.117	0.128	0.128	0.16	0.155		0.123	0.121	0.116	0.123	0.126	0.115	0.124	0.121	0.111	0.114	0.119
7215	0.126	0.125	0.12	0.123	0.14	0.139	0.122	0.131	0.129	0.296	0.274	0.15			0.146	0.167	0.15	0.117	0.128	0.124	0.117	0.127	0.127	0.159	0.155		0.123	0.121	0.116	0.123	0.126	0.115	0.123	0.121	0.111	0.114	0.119
7227	0.126	0.125	0.12	0.123	0.139	0.139	0.122	0.131	0.129	0.296	0.275	0.147			0.144	0.169	0.149	0.117	0.128	0.124	0.117	0.127	0.127	0.158	0.156		0.123	0.121	0.116	0.123	0.126	0.115	0.123	0.121	0.111	0.114	0.119
7239	0.125	0.125	0.12	0.123	0.139	0.138	0.122	0.131	0.129	0.295	0.273	0.147			0.144	0.166	0.148	0.117	0.128	0.124	0.117	0.128	0.128	0.16	0.154		0.123	0.121	0.116	0.123	0.126	0.116	0.123	0.121	0.111	0.114	0.119
7251	0.126	0.125	0.12	0.123	0.138	0.138	0.122	0.131	0.129	0.295	0.273	0.147			0.143	0.166	0.148	0.117	0.128	0.124	0.117	0.127	0.127	0.158	0.156		0.123	0.121	0.115	0.123	0.126	0.116	0.123	0.121	0.111	0.114	0.119
7263	0.125	0.124	0.119	0.123	0.138	0.137	0.122	0.131	0.129	0.295	0.272	0.146			0.142	0.165	0.147	0.117	0.128	0.124	0.117	0.127	0.128	0.158	0.153		0.123	0.12	0.115	0.123	0.126	0.116	0.123	0.121	0.111	0.114	0.119
7275	0.125	0.125	0.12	0.123	0.138	0.137	0.122	0.131	0.129	0.294	0.271	0.148			0.143	0.166	0.148	0.117	0.128	0.124	0.117	0.127	0.126	0.157	0.154		0.123	0.121	0.116	0.123	0.127	0.116	0.123	0.121	0.111	0.114	0.119
7287	0.125	0.125	0.12	0.123	0.138	0.138	0.122	0.131	0.13	0.294	0.274	0.145			0.142	0.166	0.147	0.116	0.127	0.123	0.117	0.127	0.127	0.157	0.152		0.123	0.121	0.116	0.124	0.127	0.116	0.123	0.121	0.11	0.113	0.119
7299	0.125	0.125	0.12	0.122	0.139	0.137	0.121	0.131	0.129	0.294	0.27	0.147			0.141	0.164	0.147	0.117	0.128	0.124	0.117	0.127	0.126	0.156	0.152		0.123	0.121	0.116	0.124	0.127	0.116	0.124	0.121	0.111	0.114	0.119
7311	0.125	0.125	0.12	0.122	0.137	0.137	0.122	0.131	0.129	0.294	0.269	0.145			0.143	0.164	0.147	0.117	0.128	0.124	0.117	0.127	0.126	0.155	0.154		0.123	0.121	0.116	0.123	0.126	0.115	0.123	0.121	0.111	0.114	0.119
7323	0.125	0.125	0.12	0.122	0.137	0.136	0.122	0.131	0.129	0.293	0.269	0.145			0.14	0.165	0.146	0.117	0.128	0.124	0.117	0.127	0.127	0.156	0.151		0.123	0.121	0.116	0.123	0.126	0.115	0.123	0.121	0.111	0.114	0.119
7335	0.125	0.125	0.12	0.122	0.137	0.136	0.121	0.131	0.129	0.293	0.268	0.144			0.141	0.163	0.146	0.117	0.128	0.124	0.117	0.127	0.126	0.155	0.153		0.123	0.121	0.116	0.123	0.126	0.115	0.124	0.121	0.111	0.114	0.119
7347	0.125	0.125	0.12	0.123	0.136	0.137	0.122	0.131	0.129	0.292	0.269	0.143			0.139	0.162	0.145	0.117	0.128	0.124	0.117	0.127	0.126	0.155	0.151		0.123	0.121	0.116	0.123	0.126	0.115	0.123	0.121	0.111	0.114	0.119
7359	0.124	0.125	0.12	0.122	0.137	0.135	0.122	0.132	0.129	0.292	0.267	0.145			0.139	0.162	0.145	0.117	0.128	0.124	0.117	0.127	0.125	0.154	0.151		0.123	0.121	0.116	0.122	0.126	0.115	0.123	0.121	0.111	0.114	0.119
7371	0.124	0.125	0.12	0.122	0.136	0.137	0.122	0.131	0.129	0.291	0.27	0.143			0.14	0.161	0.145	0.116	0.128	0.123	0.117	0.127	0.125	0.154	0.15		0.123	0.121	0.116	0.123	0.126	0.115	0.123	0.121	0.111	0.114	0.119
7383	0.125	0.124	0.12	0.122	0.137	0.135	0.122	0.131	0.129	0.291	0.266	0.144			0.138	0.162	0.144	0.117	0.128	0.124	0.117	0.127	0.126	0.153	0.15		0.123	0.121	0.116	0.123	0.126	0.115	0.123	0.121	0.111	0.113	0.119
7395	0.124	0.125	0.12	0.122	0.136	0.135	0.122	0.131	0.129	0.291	0.267	0.142			0.138	0.16	0.144	0.117	0.128	0.124	0.117	0.127	0.125	0.153	0.151		0.123	0.121	0.116	0.123	0.126	0.115	0.123	0.121	0.111	0.113	0.119
7407	0.124	0.124	0.12	0.122	0.135	0.135	0.122	0.131	0.129	0.29	0.264	0.142			0.139	0.16	0.144	0.117	0.128	0.124	0.117	0.127	0.125	0.153	0.149		0.123	0.121	0.116	0.122	0.126	0.115	0.123	0.121	0.111	0.114	0.12
7419	0.124	0.125	0.12	0.122	0.137	0.134	0.122	0.132	0.128	0.29	0.264	0.142			0.137	0.161	0.143	0.117	0.128	0.124	0.117	0.127	0.124	0.152	0.15		0.123	0.121	0.116	0.123	0.126	0.115	0.123	0.121	0.111	0.114	0.119
7431	0.124	0.124	0.12	0.122	0.135	0.135	0.121	0.131	0.129	0.29	0.263	0.141			0.137	0.159	0.143	0.117	0.128	0.124	0.117	0.127	0.124	0.153	0.148		0.123	0.121	0.115	0.123	0.125	0.115	0.123	0.121	0.111	0.113	0.119
7443	0.124	0.124	0.12	0.122	0.136	0.133	0.122	0.131	0.129	0.29	0.262	0.142			0.136	0.159	0.142	0.117	0.128	0.123	0.117	0.127	0.125	0.152	0.15		0.123	0.121	0.116	0.123	0.126	0.115	0.123	0.121	0.11	0.114	0.119
7455	0.124	0.125	0.12	0.122	0.135	0.134	0.122	0.131	0.129	0.289	0.263	0.141			0.136	0.16	0.142	0.117	0.128	0.124	0.117	0.127	0.124	0.152	0.147		0.123	0.121	0.116	0.123	0.126	0.115	0.123	0.121	0.11	0.113	0.119
7467	0.124	0.125	0.12	0.122	0.135	0.134	0.122	0.131	0.129	0.289	0.262	0.142			0.137	0.158	0.143	0.117	0.128	0.124	0.117	0.127	0.124	0.151	0.148		0.123	0.121	0.115	0.124	0.126	0.115	0.123	0.121	0.111	0.114	0.118
7479	0.124	0.125	0.12	0.122	0.135	0.133	0.122	0.132	0.129	0.288	0.264	0.14			0.135	0.158	0.141	0.117	0.128	0.124	0.117	0.127	0.123	0.151	0.147		0.123	0.121	0.115	0.124	0.126	0.115	0.123	0.121	0.111	0.113	0.119
7491	0.124	0.124	0.12	0.122	0.135	0.134	0.122	0.131	0.129	0.288	0.26	0.142			0.135	0.157	0.141	0.117	0.127	0.124	0.117	0.127	0.123	0.15	0.146		0.123	0.121	0.116	0.123	0.126	0.115	0.123	0.121	0.111	0.114	0.119
7503	0.123	0.124	0.12	0.122	0.135	0.133	0.122	0.131	0.129	0.288	0.263	0.14			0.135	0.157	0.141	0.117	0.128	0.124	0.117	0.127	0.124	0.15	0.147		0.123	0.121	0.116	0.124	0.126	0.115	0.123	0.121	0.111	0.114	0.119
7515	0.123	0.124	0.12	0.122	0.134	0.133	0.122	0.131	0.129	0.288	0.259	0.141			0.134	0.157	0.14	0.117	0.128	0.124	0.117	0.127	0.123	0.15	0.146		0.123	0.121	0.115	0.123	0.126	0.115	0.123	0.121	0.111	0.114	0.119
7527	0.124	0.125	0.12	0.122	0.134	0.133	0.122	0.131	0.129	0.287	0.259	0.139			0.134	0.156	0.141	0.117	0.128	0.124	0.117	0.127	0.123	0.149	0.147		0.123	0.121	0.116	0.123	0.126	0.115	0.123	0.121	0.111	0.114	0.119
7539	0.124	0.125	0.12	0.122	0.134	0.132	0.122	0.132	0.129	0.287	0.257	0.139			0.134	0.155	0.14	0.117	0.128	0.123	0.117	0.127	0.123	0.149	0.145		0.123	0.121	0.115	0.123	0.126	0.115	0.123	0.121	0.111	0.113	0.119
7551	0.123	0.125	0.12	0.122	0.134	0.133	0.122	0.131	0.129	0.286	0.258	0.139			0.133	0.156	0.14	0.116	0.127	0.123	0.117	0.126	0.123	0.148	0.147		0.123	0.121	0.116	0.123	0.126	0.115	0.123	0.121	0.111	0.114	0.119
7563	0.123	0.125	0.119	0.121	0.134	0.132	0.122	0.131	0.129	0.287	0.259	0.138			0.134	0.154	0.14	0.117	0.128	0.124	0.117	0.127	0.123	0.148	0.145		0.123	0.121	0.116	0.123	0.126	0.115	0.123	0.121	0.111	0.114	0.12
7575	0.123	0.125	0.12	0.122	0.134	0.132	0.122	0.131	0.128	0.286	0.255	0.14			0.132	0.156	0.139	0.117	0.128	0.124	0.117	0.127	0.123	0.147	0.144		0.123	0.121	0.116	0.123	0.126	0.115	0.123	0.121	0.111	0.114	0.119
7587	0.123	0.124	0.119	0.121	0.134	0.132	0.122	0.131	0.129	0.286	0.257	0.138			0.132	0.154	0.139	0.117	0.128	0.124	0.117	0.127	0.123	0.147	0.145		0.123	0.121	0.116	0.123	0.126	0.115	0.123	0.121	0.111	0.113	0.119
7599	0.123	0.125	0.12	0.122	0.134	0.132	0.122	0.132	0.128	0.285	0.254	0.137			0.133	0.153	0.139	0.117	0.128	0.124	0.117	0.126	0.122	0.148	0.143		0.123	0.121	0.116	0.123	0.126	0.115	0.123	0.121	0.111	0.114	0.119
7611	0.123	0.124	0.119	0.121	0.133	0.132	0.121	0.131	0.128	0.285	0.254	0.139			0.131	0.153	0.138	0.117	0.128	0.124	0.117	0.127	0.122	0.147	0.144		0.123	0.12	0.115	0.124	0.126	0.115	0.123	0.121	0.111	0.114	0.119
7623	0.123	0.125	0.119	0.122	0.134	0.131	0.122	0.132	0.128	0.285	0.256	0.137			0.132	0.152	0.139	0.116	0.128	0.123	0.117	0.127	0.123	0.146	0.143		0.123	0.121	0.115	0.123	0.126	0.115	0.123	0.121	0.11	0.114	0.119
7635	0.123	0.124	0.119	0.122	0.133	0.131	0.122	0.132	0.128	0.284	0.253	0.137			0.13	0.152	0.137	0.117	0.128	0.124	0.117	0.127	0.122	0.146	0.142		0.123	0.121	0.115	0.123	0.126	0.115	0.123	0.121	0.111	0.114	0.12
7647	0.123	0.125	0.12	0.121	0.132	0.131	0.122	0.131	0.128	0.284	0.252	0.137			0.13	0.151	0.138	0.117	0.127	0.124	0.117	0.127	0.122	0.146	0.144		0.123	0.121	0.115	0.123	0.126	0.115	0.123	0.121	0.111	0.114	0.119
7659	0.123	0.124	0.12	0.121	0.133	0.131	0.122	0.131	0.128	0.284	0.251	0.136			0.13	0.151	0.138	0.116	0.127	0.123	0.117	0.127	0.122	0.146	0.142		0.123	0.121	0.115	0.123	0.126	0.115	0.123	0.121	0.111	0.114	0.119
7671	0.123	0.124	0.119	0.122	0.132	0.131	0.122	0.131	0.128	0.284	0.25	0.138			0.13	0.152	0.137	0.117	0.128	0.124	0.117	0.127	0.122	0.144	0.143		0.123	0.121	0.115	0.123	0.126	0.115	0.123	0.121	0.111	0.114	0.119
7683	0.123	0.124	0.12	0.122	0.133	0.13	0.122	0.131	0.128	0.283	0.253	0.136			0.131	0.151	0.138	0.117	0.127	0.124	0.117	0.127	0.122	0.145	0.141		0.123	0.121	0.115	0.123	0.126	0.115	0.123	0.121	0.111	0.114	0.119
7695	0.123	0.124	0.119	0.122	0.132	0.13	0.121	0.13	0.128	0.283	0.249	0.137			0.129	0.152	0.136	0.117	0.128	0.124	0.117	0.127	0.122	0.144	0.141		0.123	0.121	0.115	0.123	0.126	0.115	0.123	0.121	0.111	0.114	0.119
7707	0.123	0.125	0.12	0.121	0.132	0.131	0.122	0.13	0.129	0.283	0.249	0.136			0.129	0.15	0.136	0.117	0.128	0.124	0.117	0.127	0.122	0.144	0.143		0.123	0.121	0.115	0.123	0.126	0.115	0.123	0.121	0.111	0.114	0.119
7719	0.123	0.125	0.12	0.122	0.133	0.131	0.121	0.131	0.128	0.282	0.25	0.135			0.13	0.15	0.136	0.117	0.128	0.124	0.117	0.126	0.122	0.144	0.141		0.123	0.121	0.115	0.123	0.126	0.115	0.123	0.121	0.111	0.113	0.119
7731	0.123	0.125	0.12	0.122	0.132	0.131	0.121	0.13	0.128	0.282	0.247	0.137			0.128	0.15	0.136	0.116	0.127	0.124	0.117	0.127	0.122	0.143	0.14		0.123	0.121	0.115	0.123	0.126	0.115	0.123	0.121	0.11	0.114	0.119
7743	0.123	0.124	0.119	0.122	0.132	0.13	0.121	0.131	0.128	0.281	0.249	0.135			0.129	0.149	0.136	0.117	0.127	0.124	0.117	0.127	0.122	0.143	0.141		0.123	0.121	0.115	0.123	0.126	0.115	0.123	0.121	0.11	0.113	0.119
7755	0.123	0.125	0.12	0.121	0.132	0.13	0.122	0.131	0.128	0.281	0.245	0.135			0.128	0.149	0.135	0.117	0.128	0.124	0.117	0.127	0.122	0.143	0.139		0.123	0.121	0.116	0.124	0.126	0.115	0.123	0.121	0.111	0.113	0.119
7767	0.123	0.125	0.12	0.121	0.133	0.13	0.122	0.13	0.128	0.281	0.245	0.136			0.128	0.148	0.135	0.117	0.127	0.124	0.117	0.127	0.122	0.142	0.14		0.123	0.121	0.116	0.123	0.126	0.115	0.123	0.121	0.111	0.114	0.119
7779	0.123	0.124	0.119	0.122	0.133	0.13	0.122	0.131	0.128	0.281	0.248	0.135			0.127	0.147	0.135	0.117	0.127	0.124	0.117	0.127	0.122	0.143	0.139		0.123	0.121	0.116	0.124	0.126	0.115	0.123	0.121	0.111	0.114	0.119
7791	0.123	0.125	0.12	0.122	0.132	0.13	0.121	0.131	0.128	0.28	0.244	0.135			0.127	0.147	0.135	0.117	0.128	0.124	0.117	0.127	0.121	0.142	0.139		0.123	0.121	0.116	0.124	0.126	0.115	0.123	0.121	0.111	0.114	0.119
7803	0.123	0.124	0.119	0.122	0.133	0.13	0.121	0.131	0.128	0.28	0.245	0.134			0.128	0.147	0.135	0.117	0.127	0.124	0.117	0.127	0.121	0.141	0.14		0.123	0.121	0.115	0.123	0.126	0.115	0.123	0.121	0.111	0.113	0.118
7815	0.122	0.124	0.119	0.122	0.132	0.13	0.122	0.131	0.128	0.279	0.243	0.134			0.126	0.148	0.134	0.117	0.127	0.124	0.117	0.127	0.121	0.141	0.138		0.123	0.121	0.116	0.124	0.126	0.115	0.123	0.121	0.111	0.113	0.119
7827	0.122	0.125	0.119	0.122	0.132	0.13	0.122	0.131	0.128	0.279	0.241	0.134			0.126	0.146	0.134	0.117	0.128	0.124	0.117	0.127	0.121	0.141	0.14		0.123	0.121	0.116	0.123	0.126	0.116	0.123	0.121	0.111	0.113	0.119
7839	0.123	0.124	0.119	0.121	0.132	0.129	0.121	0.132	0.128	0.279	0.243	0.134			0.126	0.146	0.134	0.117	0.127	0.124	0.117	0.127	0.121	0.141	0.138		0.123	0.121	0.115	0.123	0.126	0.115	0.123	0.121	0.111	0.114	0.119
7851	0.122	0.125	0.119	0.121	0.131	0.13	0.122	0.131	0.128	0.278	0.241	0.133			0.126	0.146	0.133	0.116	0.127	0.124	0.117	0.127	0.122	0.14	0.139		0.123	0.121	0.115	0.123	0.126	0.115	0.123	0.121	0.111	0.114	0.119
7863	0.122	0.124	0.119	0.121	0.131	0.129	0.122	0.131	0.128	0.278	0.242	0.133			0.125	0.145	0.133	0.117	0.127	0.123	0.117	0.127	0.122	0.141	0.137		0.123	0.121	0.115	0.123	0.126	0.115	0.122	0.121	0.111	0.114	0.119
7875	0.123	0.125	0.119	0.122	0.131	0.129	0.121	0.131	0.128	0.278	0.24	0.135			0.125	0.146	0.133	0.117	0.128	0.124	0.117	0.127	0.121	0.14	0.138		0.123	0.121	0.115	0.123	0.126	0.115	0.123	0.121	0.11	0.114	0.119
7887	0.122	0.124	0.119	0.121	0.131	0.129	0.122	0.131	0.129	0.278	0.241	0.133			0.126	0.145	0.133	0.116	0.127	0.123	0.117	0.127	0.121	0.14	0.137		0.123	0.121	0.116	0.123	0.126	0.115	0.123	0.121	0.111	0.114	0.119
7899	0.122	0.125	0.119	0.121	0.131	0.129	0.121	0.131	0.128	0.277	0.239	0.133			0.125	0.146	0.133	0.116	0.127	0.123	0.117	0.127	0.122	0.139	0.136		0.123	0.121	0.115	0.123	0.126	0.115	0.123	0.121	0.111	0.114	0.119
7911	0.122	0.124	0.119	0.121	0.131	0.129	0.122	0.131	0.128	0.277	0.24	0.133			0.124	0.144	0.132	0.116	0.127	0.124	0.117	0.127	0.122	0.139	0.138		0.123	0.121	0.116	0.123	0.126	0.115	0.123	0.121	0.111	0.114	0.119
7923	0.123	0.125	0.12	0.121	0.131	0.129	0.121	0.131	0.128	0.277	0.238	0.133			0.124	0.144	0.132	0.116	0.127	0.124	0.117	0.126	0.121	0.139	0.136		0.123	0.121	0.116	0.123	0.127	0.115	0.123	0.121	0.111	0.114	0.119
7935	0.123	0.124	0.12	0.121	0.13	0.129	0.121	0.131	0.128	0.276	0.237	0.132			0.124	0.143	0.132	0.117	0.128	0.124	0.117	0.127	0.121	0.139	0.138		0.123	0.121	0.115	0.123	0.126	0.115	0.123	0.121	0.111	0.114	0.119
7947	0.122	0.124	0.119	0.121	0.131	0.13	0.122	0.131	0.128	0.276	0.238	0.132			0.124	0.143	0.131	0.117	0.128	0.124	0.117	0.126	0.121	0.139	0.136		0.123	0.12	0.116	0.122	0.126	0.115	0.123	0.121	0.11	0.114	0.119
7959	0.123	0.125	0.119	0.122	0.131	0.129	0.122	0.131	0.128	0.276	0.236	0.133			0.124	0.144	0.131	0.116	0.128	0.123	0.117	0.127	0.121	0.138	0.136		0.123	0.12	0.115	0.122	0.126	0.116	0.123	0.121	0.111	0.114	0.119
7971	0.122	0.125	0.119	0.121	0.131	0.129	0.121	0.131	0.13	0.275	0.238	0.132			0.124	0.143	0.131	0.117	0.127	0.124	0.117	0.127	0.121	0.138	0.135		0.123	0.121	0.116	0.123	0.126	0.115	0.123	0.121	0.111	0.114	0.119
7983	0.122	0.125	0.119	0.121	0.131	0.129	0.122	0.131	0.131	0.275	0.234	0.132			0.123	0.143	0.131	0.117	0.128	0.124	0.117	0.126	0.121	0.138	0.135		0.123	0.121	0.115	0.123	0.126	0.115	0.123	0.121	0.111	0.113	0.119
7995	0.122	0.124	0.119	0.121	0.131	0.129	0.121	0.13	0.13	0.275	0.235	0.132			0.123	0.142	0.131	0.116	0.127	0.124	0.117	0.127	0.121	0.137	0.136		0.123	0.121	0.115	0.122	0.126	0.115	0.122	0.121	0.111	0.114	0.12
8007	0.122	0.125	0.119	0.121	0.13	0.129	0.121	0.13	0.128	0.275	0.233	0.131			0.123	0.142	0.13	0.117	0.127	0.124	0.117	0.127	0.121	0.138	0.134		0.123	0.121	0.115	0.122	0.126	0.115	0.123	0.121	0.111	0.113	0.119
8019	0.123	0.125	0.119	0.121	0.131	0.129	0.121	0.13	0.128	0.274	0.231	0.132			0.123	0.142	0.13	0.117	0.128	0.124	0.117	0.127	0.121	0.137	0.135		0.123	0.121	0.115	0.122	0.126	0.115	0.122	0.121	0.11	0.114	0.119
8031	0.122	0.124	0.119	0.121	0.13	0.129	0.121	0.13	0.128	0.274	0.235	0.131			0.123	0.14	0.13	0.116	0.127	0.123	0.117	0.127	0.121	0.137	0.134		0.123	0.12	0.115	0.123	0.126	0.115	0.123	0.121	0.111	0.114	0.119
8043	0.122	0.125	0.119	0.121	0.13	0.129	0.122	0.131	0.128	0.274	0.23	0.132			0.122	0.142	0.13	0.116	0.127	0.123	0.117	0.127	0.121	0.136	0.134		0.123	0.12	0.115	0.123	0.125	0.115	0.123	0.121	0.111	0.113	0.119
8055	0.122	0.124	0.119	0.121	0.13	0.129	0.122	0.131	0.128	0.273	0.234	0.131			0.122	0.141	0.13	0.116	0.128	0.124	0.117	0.127	0.121	0.136	0.134		0.123	0.121	0.115	0.123	0.126	0.115	0.123	0.121	0.111	0.114	0.119
8067	0.123	0.124	0.119	0.121	0.13	0.129	0.121	0.13	0.128	0.273	0.231	0.132			0.122	0.14	0.129	0.117	0.127	0.124	0.117	0.127	0.121	0.136	0.134		0.123	0.12	0.115	0.122	0.126	0.115	0.123	0.121	0.111	0.114	0.119
8079	0.122	0.124	0.119	0.122	0.131	0.129	0.122	0.13	0.128	0.273	0.233	0.131			0.122	0.14	0.129	0.117	0.128	0.124	0.117	0.127	0.121	0.136	0.134		0.123	0.12	0.116	0.123	0.126	0.115	0.123	0.121	0.111	0.114	0.119
8091	0.123	0.125	0.119	0.121	0.13	0.129	0.121	0.13	0.128	0.273	0.229	0.131			0.122	0.14	0.129	0.116	0.127	0.123	0.117	0.127	0.121	0.136	0.133		0.123	0.121	0.115	0.123	0.125	0.115	0.123	0.121	0.11	0.114	0.119
8103	0.123	0.124	0.119	0.122	0.13	0.129	0.121	0.13	0.129	0.272	0.229	0.131			0.121	0.141	0.129	0.116	0.127	0.123	0.117	0.127	0.121	0.135	0.134		0.123	0.121	0.115	0.123	0.126	0.115	0.123	0.121	0.111	0.113	0.119
8115	0.122	0.124	0.119	0.121	0.13	0.129	0.122	0.13	0.13	0.272	0.231	0.131			0.121	0.139	0.129	0.116	0.128	0.124	0.117	0.127	0.121	0.135	0.133		0.123	0.12	0.115	0.123	0.126	0.115	0.123	0.121	0.111	0.113	0.119
8127	0.122	0.124	0.119	0.122	0.13	0.129	0.121	0.13	0.129	0.272	0.228	0.131			0.121	0.139	0.128	0.117	0.127	0.124	0.117	0.126	0.121	0.135	0.134		0.123	0.121	0.115	0.123	0.126	0.115	0.123	0.121	0.111	0.114	0.119
8139	0.122	0.124	0.119	0.121	0.13	0.128	0.121	0.13	0.129	0.271	0.229	0.131			0.121	0.139	0.128	0.116	0.128	0.123	0.117	0.127	0.122	0.135	0.133		0.123	0.121	0.115	0.123	0.126	0.115	0.123	0.121	0.111	0.114	0.119
8151	0.122	0.124	0.119	0.122	0.13	0.129	0.121	0.13	0.128	0.271	0.227	0.131			0.121	0.139	0.129	0.117	0.127	0.124	0.117	0.126	0.122	0.135	0.133		0.123	0.121	0.115	0.123	0.126	0.115	0.123	0.121	0.111	0.114	0.119
8163	0.122	0.124	0.118	0.122	0.13	0.129	0.121	0.13	0.128	0.271	0.229	0.13			0.12	0.139	0.128	0.116	0.127	0.123	0.117	0.126	0.122	0.135	0.132		0.122	0.12	0.115	0.122	0.126	0.115	0.123	0.121	0.11	0.113	0.119
8175	0.123	0.124	0.119	0.122	0.13	0.129	0.121	0.13	0.128	0.271	0.225	0.131			0.121	0.138	0.128	0.116	0.128	0.123	0.116	0.127	0.122	0.134	0.132		0.123	0.12	0.115	0.123	0.126	0.115	0.123	0.121	0.111	0.114	0.119
8187	0.122	0.124	0.119	0.121	0.129	0.129	0.121	0.13	0.128	0.27	0.224	0.13			0.12	0.139	0.127	0.116	0.127	0.123	0.117	0.126	0.122	0.134	0.133		0.123	0.121	0.115	0.122	0.126	0.115	0.123	0.121	0.11	0.114	0.119
8199	0.123	0.125	0.119	0.122	0.13	0.129	0.121	0.13	0.128	0.269	0.226	0.13			0.12	0.137	0.127	0.117	0.128	0.124	0.117	0.127	0.122	0.134	0.131		0.123	0.121	0.115	0.122	0.126	0.115	0.123	0.121	0.11	0.114	0.119
8211	0.122	0.125	0.119	0.121	0.13	0.129	0.121	0.13	0.128	0.27	0.224	0.131			0.12	0.137	0.127	0.117	0.128	0.124	0.117	0.126	0.122	0.133	0.132		0.123	0.121	0.115	0.123	0.126	0.115	0.123	0.121	0.111	0.114	0.119
8223	0.122	0.125	0.119	0.122	0.13	0.129	0.121	0.13	0.128	0.27	0.226	0.13			0.12	0.138	0.127	0.117	0.128	0.124	0.117	0.126	0.122	0.134	0.131		0.123	0.121	0.116	0.123	0.126	0.115	0.123	0.121	0.111	0.114	0.118
8235	0.122	0.124	0.119	0.122	0.129	0.129	0.121	0.13	0.128	0.269	0.222	0.131			0.12	0.137	0.127	0.117	0.128	0.124	0.117	0.126	0.121	0.133	0.131		0.123	0.121	0.115	0.123	0.126	0.115	0.123	0.122	0.11	0.114	0.118
8247	0.122	0.124	0.119	0.121	0.13	0.128	0.121	0.13	0.128	0.269	0.223	0.13			0.119	0.137	0.127	0.117	0.127	0.124	0.117	0.126	0.121	0.133	0.132		0.123	0.121	0.116	0.123	0.126	0.115	0.123	0.121	0.111	0.114	0.119
8259	0.123	0.124	0.119	0.122	0.13	0.129	0.121	0.13	0.128	0.268	0.221	0.13			0.119	0.137	0.127	0.117	0.128	0.124	0.117	0.127	0.121	0.133	0.131		0.123	0.121	0.115	0.123	0.126	0.115	0.123	0.121	0.111	0.114	0.119
8271	0.123	0.124	0.119	0.121	0.129	0.128	0.121	0.13	0.132	0.268	0.221	0.13			0.119	0.136	0.127	0.116	0.127	0.123	0.117	0.126	0.121	0.133	0.132		0.123	0.121	0.115	0.123	0.126	0.115	0.123	0.121	0.111	0.114	0.119
8283	0.123	0.124	0.119	0.121	0.129	0.129	0.121	0.13	0.132	0.268	0.221	0.13			0.119	0.137	0.126	0.116	0.127	0.123	0.117	0.126	0.121	0.133	0.13		0.123	0.12	0.115	0.123	0.125	0.115	0.123	0.121	0.11	0.114	0.119
8295	0.123	0.124	0.119	0.122	0.129	0.129	0.121	0.131	0.13	0.268	0.22	0.13			0.119	0.136	0.126	0.116	0.128	0.123	0.117	0.126	0.121	0.132	0.13		0.123	0.12	0.115	0.123	0.126	0.115	0.122	0.121	0.111	0.114	0.119
8307	0.123	0.124	0.119	0.121	0.129	0.13	0.121	0.131	0.129	0.267	0.222	0.13			0.118	0.136	0.126	0.117	0.127	0.124	0.117	0.127	0.121	0.132	0.13		0.123	0.12	0.115	0.123	0.126	0.115	0.122	0.121	0.111	0.114	0.119
8319	0.123	0.124	0.119	0.121	0.13	0.13	0.121	0.131	0.128	0.267	0.218	0.13			0.119	0.135	0.126	0.117	0.128	0.124	0.117	0.127	0.121	0.132	0.13		0.123	0.12	0.115	0.123	0.126	0.115	0.123	0.121	0.111	0.114	0.119
8331	0.123	0.124	0.119	0.121	0.129	0.13	0.121	0.131	0.128	0.267	0.218	0.13			0.118	0.135	0.125	0.116	0.127	0.124	0.117	0.126	0.121	0.132	0.131		0.123	0.121	0.115	0.123	0.126	0.115	0.123	0.121	0.111	0.113	0.119
8343	0.123	0.124	0.119	0.121	0.129	0.13	0.121	0.13	0.128	0.266	0.219	0.129			0.118	0.135	0.125	0.116	0.127	0.123	0.117	0.127	0.121	0.132	0.13		0.123	0.121	0.115	0.123	0.126	0.115	0.123	0.121	0.111	0.113	0.119
8355	0.123	0.125	0.119	0.121	0.129	0.13	0.121	0.13	0.128	0.266	0.216	0.13			0.119	0.135	0.126	0.116	0.127	0.123	0.117	0.126	0.122	0.132	0.13		0.123	0.12	0.115	0.123	0.126	0.115	0.123	0.121	0.111	0.114	0.119
8367	0.123	0.124	0.119	0.121	0.129	0.129	0.121	0.13	0.128	0.266	0.219	0.129			0.118	0.135	0.125	0.116	0.127	0.123	0.117	0.126	0.122	0.131	0.13		0.123	0.12	0.115	0.123	0.126	0.115	0.123	0.121	0.111	0.114	0.119
8379	0.122	0.124	0.119	0.121	0.129	0.129	0.121	0.13	0.128	0.266	0.214	0.129			0.118	0.134	0.125	0.116	0.127	0.123	0.117	0.127	0.122	0.131	0.129		0.123	0.12	0.115	0.122	0.126	0.115	0.123	0.121	0.111	0.113	0.119
8391	0.123	0.124	0.119	0.121	0.129	0.128	0.121	0.13	0.128	0.265	0.214	0.129			0.118	0.134	0.125	0.116	0.127	0.123	0.116	0.126	0.121	0.131	0.13		0.123	0.12	0.115	0.123	0.126	0.115	0.123	0.121	0.111	0.113	0.119
8403	0.123	0.125	0.119	0.121	0.129	0.128	0.121	0.13	0.128	0.265	0.215	0.129			0.118	0.135	0.125	0.116	0.127	0.123	0.117	0.127	0.122	0.131	0.129		0.123	0.121	0.116	0.123	0.127	0.115	0.123	0.121	0.11	0.113	0.119
8415	0.122	0.124	0.119	0.122	0.129	0.128	0.121	0.13	0.128	0.264	0.214	0.129			0.118	0.134	0.125	0.116	0.127	0.123	0.117	0.127	0.122	0.13	0.129		0.123	0.12	0.116	0.123	0.126	0.115	0.122	0.121	0.111	0.114	0.119
8427	0.122	0.125	0.119	0.121	0.129	0.128	0.121	0.13	0.128	0.264	0.215	0.129			0.117	0.134	0.125	0.116	0.127	0.123	0.117	0.126	0.121	0.131	0.128		0.122	0.12	0.116	0.123	0.126	0.115	0.123	0.121	0.111	0.114	0.119
8439	0.122	0.124	0.119	0.121	0.129	0.128	0.121	0.13	0.128	0.264	0.212	0.13			0.117	0.134	0.124	0.116	0.127	0.123	0.117	0.127	0.121	0.131	0.129		0.122	0.12	0.115	0.123	0.125	0.115	0.123	0.121	0.111	0.114	0.12
8451	0.122	0.124	0.119	0.121	0.129	0.128	0.122	0.13	0.128	0.264	0.213	0.129			0.117	0.133	0.124	0.116	0.127	0.123	0.117	0.127	0.121	0.13	0.129		0.122	0.12	0.115	0.123	0.125	0.115	0.123	0.121	0.11	0.113	0.118
8463	0.122	0.124	0.119	0.121	0.129	0.128	0.122	0.13	0.128	0.264	0.212	0.129			0.117	0.133	0.124	0.116	0.127	0.123	0.117	0.127	0.121	0.131	0.128		0.123	0.12	0.115	0.123	0.125	0.115	0.123	0.121	0.111	0.114	0.119
8475	0.123	0.124	0.119	0.121	0.129	0.128	0.121	0.13	0.128	0.264	0.211	0.129			0.118	0.133	0.124	0.116	0.127	0.123	0.117	0.126	0.121	0.13	0.129		0.123	0.121	0.115	0.123	0.125	0.115	0.122	0.121	0.11	0.114	0.119
8487	0.122	0.124	0.119	0.121	0.128	0.128	0.121	0.13	0.128	0.263	0.213	0.129			0.117	0.133	0.124	0.117	0.127	0.123	0.117	0.126	0.121	0.13	0.128		0.122	0.121	0.115	0.123	0.126	0.115	0.123	0.121	0.11	0.113	0.119
8499	0.123	0.125	0.119	0.121	0.128	0.128	0.121	0.129	0.128	0.263	0.21	0.129			0.118	0.133	0.124	0.116	0.127	0.123	0.117	0.127	0.121	0.13	0.128		0.123	0.121	0.115	0.123	0.126	0.115	0.123	0.121	0.111	0.113	0.119
8511	0.123	0.124	0.119	0.121	0.128	0.129	0.121	0.13	0.128	0.262	0.211	0.128			0.117	0.133	0.124	0.116	0.127	0.123	0.117	0.126	0.121	0.13	0.128		0.122	0.12	0.115	0.123	0.126	0.115	0.123	0.121	0.11	0.113	0.119
8523	0.122	0.124	0.119	0.121	0.128	0.128	0.121	0.13	0.128	0.262	0.21	0.128			0.117	0.132	0.124	0.116	0.127	0.123	0.117	0.126	0.121	0.13	0.127		0.123	0.121	0.115	0.123	0.126	0.115	0.123	0.121	0.11	0.114	0.118
8535	0.122	0.125	0.119	0.121	0.128	0.129	0.121	0.13	0.128	0.262	0.209	0.129			0.117	0.132	0.124	0.116	0.127	0.124	0.117	0.126	0.121	0.13	0.128		0.123	0.121	0.115	0.123	0.126	0.115	0.123	0.121	0.111	0.114	0.119
8547	0.122	0.124	0.119	0.121	0.128	0.128	0.121	0.13	0.128	0.262	0.21	0.129			0.116	0.133	0.123	0.116	0.127	0.123	0.117	0.126	0.121	0.13	0.128		0.123	0.12	0.115	0.123	0.126	0.115	0.123	0.121	0.11	0.113	0.119
8559	0.122	0.124	0.119	0.121	0.128	0.129	0.121	0.13	0.128	0.261	0.207	0.129			0.116	0.132	0.123	0.116	0.127	0.123	0.117	0.127	0.121	0.13	0.127		0.122	0.12	0.115	0.123	0.127	0.115	0.123	0.121	0.111	0.114	0.119
8571	0.123	0.125	0.119	0.121	0.128	0.129	0.121	0.13	0.127	0.261	0.21	0.129			0.116	0.132	0.123	0.116	0.127	0.123	0.116	0.126	0.121	0.13	0.127		0.123	0.12	0.115	0.123	0.127	0.115	0.123	0.121	0.111	0.113	0.119
8583	0.122	0.125	0.119	0.121	0.128	0.129	0.121	0.13	0.128	0.261	0.206	0.129			0.116	0.132	0.123	0.116	0.127	0.123	0.117	0.126	0.121	0.13	0.127		0.123	0.121	0.115	0.123	0.127	0.115	0.123	0.121	0.111	0.113	0.119
8595	0.123	0.125	0.119	0.121	0.128	0.13	0.121	0.13	0.128	0.261	0.206	0.129			0.116	0.132	0.123	0.116	0.128	0.123	0.117	0.126	0.121	0.129	0.128		0.123	0.12	0.115	0.123	0.127	0.115	0.123	0.121	0.111	0.114	0.119
8607	0.123	0.125	0.119	0.121	0.128	0.13	0.121	0.13	0.128	0.26	0.206	0.129			0.116	0.132	0.123	0.116	0.127	0.123	0.117	0.126	0.121	0.129	0.127		0.123	0.12	0.115	0.123	0.126	0.115	0.123	0.121	0.11	0.114	0.118
8619	0.122	0.125	0.119	0.121	0.128	0.13	0.121	0.13	0.128	0.26	0.206	0.129			0.116	0.131	0.123	0.116	0.127	0.123	0.117	0.127	0.121	0.129	0.127		0.123	0.12	0.115	0.123	0.126	0.115	0.123	0.121	0.111	0.114	0.119
8631	0.122	0.125	0.119	0.121	0.128	0.13	0.121	0.13	0.127	0.26	0.208	0.129			0.116	0.132	0.123	0.116	0.127	0.123	0.116	0.127	0.121	0.129	0.127		0.123	0.12	0.114	0.123	0.125	0.115	0.123	0.121	0.11	0.114	0.119
8643	0.123	0.125	0.119	0.121	0.128	0.129	0.121	0.13	0.128	0.259	0.204	0.129			0.116	0.131	0.123	0.116	0.127	0.123	0.117	0.127	0.121	0.129	0.126		0.123	0.12	0.115	0.123	0.125	0.115	0.123	0.121	0.11	0.113	0.119
8655	0.122	0.124	0.119	0.121	0.128	0.129	0.121	0.13	0.128	0.259	0.205	0.129			0.116	0.131	0.122	0.116	0.127	0.123	0.117	0.126	0.121	0.129	0.127		0.122	0.12	0.115	0.123	0.125	0.115	0.123	0.121	0.111	0.113	0.119
8667	0.122	0.125	0.119	0.121	0.128	0.129	0.121	0.13	0.128	0.259	0.203	0.129			0.116	0.131	0.123	0.116	0.127	0.124	0.117	0.126	0.121	0.129	0.126		0.123	0.121	0.115	0.123	0.125	0.115	0.123	0.121	0.111	0.113	0.119
8679	0.122	0.124	0.119	0.121	0.128	0.128	0.121	0.13	0.128	0.259	0.203	0.129			0.116	0.131	0.123	0.116	0.127	0.123	0.116	0.126	0.121	0.129	0.127		0.123	0.121	0.115	0.123	0.125	0.115	0.123	0.121	0.111	0.114	0.119
8691	0.122	0.124	0.119	0.121	0.128	0.128	0.121	0.13	0.128	0.258	0.205	0.128			0.116	0.132	0.123	0.116	0.127	0.123	0.117	0.126	0.121	0.128	0.126		0.123	0.121	0.115	0.123	0.126	0.115	0.123	0.121	0.11	0.113	0.119
8703	0.122	0.124	0.119	0.121	0.128	0.128	0.121	0.13	0.128	0.258	0.202	0.129			0.116	0.13	0.122	0.117	0.127	0.124	0.116	0.127	0.121	0.128	0.126		0.123	0.121	0.115	0.123	0.126	0.115	0.123	0.121	0.111	0.114	0.119
8715	0.122	0.124	0.119	0.121	0.128	0.128	0.121	0.13	0.127	0.258	0.203	0.128			0.116	0.131	0.122	0.116	0.127	0.123	0.116	0.126	0.121	0.128	0.126		0.123	0.121	0.115	0.123	0.125	0.115	0.123	0.121	0.111	0.113	0.119
8727	0.122	0.124	0.119	0.121	0.128	0.128	0.122	0.13	0.128	0.257	0.201	0.128			0.115	0.13	0.122	0.116	0.127	0.123	0.117	0.127	0.121	0.128	0.126		0.122	0.121	0.115	0.123	0.125	0.115	0.123	0.121	0.111	0.114	0.119
8739	0.122	0.124	0.118	0.121	0.128	0.128	0.121	0.13	0.128	0.257	0.201	0.128			0.116	0.13	0.122	0.116	0.127	0.123	0.117	0.126	0.121	0.128	0.127		0.123	0.12	0.115	0.123	0.126	0.115	0.123	0.121	0.111	0.113	0.119
8751	0.122	0.124	0.119	0.122	0.129	0.128	0.121	0.13	0.128	0.257	0.2	0.129			0.116	0.13	0.122	0.116	0.127	0.123	0.117	0.126	0.121	0.128	0.126		0.123	0.12	0.115	0.123	0.126	0.115	0.123	0.121	0.111	0.114	0.119
8763	0.122	0.125	0.119	0.121	0.129	0.128	0.121	0.13	0.128	0.257	0.199	0.128			0.116	0.13	0.122	0.117	0.127	0.124	0.116	0.126	0.121	0.128	0.126		0.123	0.121	0.115	0.123	0.126	0.115	0.123	0.121	0.111	0.114	0.119
8775	0.122	0.124	0.118	0.121	0.129	0.129	0.121	0.13	0.128	0.257	0.2	0.129			0.115	0.129	0.122	0.116	0.127	0.123	0.117	0.126	0.121	0.128	0.126		0.122	0.12	0.115	0.123	0.126	0.115	0.123	0.121	0.111	0.113	0.119
8787	0.122	0.125	0.119	0.121	0.129	0.129	0.121	0.13	0.128	0.256	0.197	0.129			0.115	0.13	0.122	0.116	0.127	0.123	0.117	0.127	0.121	0.128	0.126		0.123	0.121	0.115	0.123	0.126	0.115	0.123	0.121	0.111	0.113	0.119
8799	0.122	0.124	0.118	0.122	0.129	0.131	0.121	0.13	0.129	0.256	0.2	0.128			0.116	0.129	0.122	0.116	0.127	0.123	0.117	0.126	0.121	0.128	0.126		0.123	0.121	0.115	0.123	0.126	0.115	0.123	0.121	0.111	0.114	0.119
8811	0.122	0.125	0.119	0.121	0.129	0.13	0.121	0.13	0.129	0.255	0.196	0.128			0.116	0.129	0.122	0.116	0.127	0.124	0.117	0.126	0.121	0.128	0.126		0.123	0.121	0.115	0.123	0.126	0.115	0.122	0.121	0.11	0.113	0.119
8823	0.122	0.124	0.118	0.121	0.129	0.13	0.121	0.13	0.129	0.256	0.197	0.128			0.115	0.129	0.122	0.116	0.127	0.123	0.117	0.127	0.121	0.128	0.126		0.123	0.121	0.115	0.123	0.126	0.115	0.122	0.121	0.11	0.113	0.119
8835	0.122	0.124	0.119	0.121	0.128	0.129	0.121	0.129	0.129	0.255	0.198	0.128			0.115	0.129	0.122	0.116	0.127	0.123	0.117	0.126	0.121	0.128	0.126		0.123	0.12	0.115	0.123	0.125	0.115	0.123	0.121	0.111	0.114	0.119
8847	0.122	0.125	0.118	0.121	0.129	0.129	0.121	0.129	0.128	0.255	0.196	0.128			0.115	0.129	0.122	0.116	0.127	0.124	0.116	0.126	0.121	0.127	0.125		0.122	0.12	0.115	0.123	0.126	0.115	0.122	0.121	0.11	0.113	0.119
8859	0.122	0.125	0.118	0.121	0.129	0.129	0.121	0.129	0.128	0.255	0.198	0.128			0.115	0.129	0.121	0.116	0.127	0.123	0.116	0.126	0.121	0.128	0.125		0.122	0.12	0.115	0.123	0.126	0.115	0.123	0.121	0.111	0.114	0.119
8871	0.122	0.124	0.118	0.121	0.129	0.129	0.121	0.13	0.128	0.254	0.195	0.128			0.115	0.129	0.122	0.116	0.127	0.124	0.117	0.127	0.121	0.128	0.125		0.122	0.12	0.115	0.123	0.126	0.115	0.123	0.121	0.111	0.114	0.119
8883	0.122	0.124	0.119	0.121	0.129	0.128	0.121	0.13	0.128	0.254	0.197	0.128			0.115	0.129	0.121	0.117	0.127	0.123	0.117	0.126	0.122	0.128	0.125		0.123	0.12	0.115	0.123	0.126	0.115	0.123	0.121	0.111	0.113	0.119
8895	0.122	0.124	0.119	0.121	0.129	0.128	0.121	0.13	0.128	0.254	0.194	0.128			0.115	0.129	0.121	0.116	0.127	0.123	0.117	0.127	0.121	0.128	0.125		0.123	0.12	0.115	0.123	0.125	0.115	0.123	0.121	0.11	0.113	0.119
8907	0.122	0.125	0.119	0.121	0.129	0.129	0.121	0.13	0.128	0.254	0.193	0.128			0.115	0.129	0.121	0.117	0.127	0.124	0.117	0.127	0.121	0.128	0.126		0.123	0.12	0.115	0.123	0.125	0.115	0.123	0.121	0.111	0.113	0.118
8919	0.122	0.124	0.119	0.121	0.128	0.129	0.121	0.13	0.128	0.253	0.193	0.128			0.115	0.128	0.121	0.116	0.127	0.123	0.117	0.126	0.121	0.128	0.125		0.123	0.121	0.115	0.122	0.125	0.115	0.123	0.121	0.111	0.113	0.119
8931	0.122	0.124	0.119	0.121	0.128	0.129	0.121	0.13	0.128	0.253	0.193	0.129			0.115	0.129	0.121	0.116	0.127	0.123	0.117	0.126	0.121	0.127	0.125		0.123	0.12	0.115	0.123	0.125	0.115	0.123	0.121	0.111	0.113	0.118
8943	0.122	0.124	0.118	0.121	0.128	0.129	0.121	0.13	0.127	0.252	0.195	0.128			0.115	0.128	0.121	0.117	0.127	0.123	0.117	0.126	0.121	0.127	0.125		0.123	0.12	0.116	0.123	0.126	0.115	0.122	0.121	0.111	0.114	0.119
8955	0.122	0.124	0.118	0.121	0.128	0.129	0.121	0.13	0.128	0.252	0.192	0.129			0.115	0.128	0.121	0.117	0.127	0.123	0.117	0.126	0.121	0.127	0.125		0.123	0.12	0.115	0.123	0.125	0.115	0.123	0.121	0.11	0.113	0.118
8967	0.122	0.124	0.119	0.121	0.128	0.128	0.121	0.13	0.129	0.252	0.192	0.129			0.114	0.128	0.121	0.116	0.127	0.123	0.116	0.127	0.121	0.127	0.125		0.122	0.121	0.115	0.122	0.125	0.115	0.123	0.121	0.111	0.113	0.118
8979	0.122	0.124	0.118	0.121	0.128	0.129	0.121	0.13	0.128	0.251	0.191	0.128			0.114	0.128	0.121	0.117	0.127	0.123	0.117	0.127	0.121	0.127	0.124		0.122	0.12	0.116	0.123	0.126	0.115	0.123	0.121	0.11	0.113	0.119
8991	0.122	0.124	0.118	0.121	0.128	0.128	0.121	0.13	0.127	0.251	0.19	0.128			0.114	0.128	0.121	0.116	0.127	0.123	0.116	0.126	0.121	0.127	0.125		0.122	0.12	0.115	0.123	0.125	0.115	0.122	0.121	0.111	0.113	0.119
9003	0.123	0.124	0.119	0.121	0.128	0.129	0.122	0.13	0.128	0.251	0.191	0.128			0.115	0.128	0.121	0.116	0.127	0.123	0.117	0.127	0.121	0.127	0.125		0.123	0.12	0.115	0.123	0.126	0.115	0.122	0.121	0.111	0.113	0.119
9015	0.122	0.124	0.118	0.121	0.128	0.129	0.121	0.13	0.128	0.251	0.19	0.128			0.114	0.128	0.121	0.117	0.127	0.123	0.117	0.126	0.121	0.127	0.124		0.122	0.12	0.115	0.122	0.126	0.115	0.123	0.121	0.111	0.114	0.119
9027	0.122	0.124	0.119	0.121	0.128	0.129	0.121	0.13	0.128	0.251	0.189	0.128			0.115	0.127	0.121	0.116	0.127	0.123	0.117	0.126	0.122	0.127	0.125		0.123	0.12	0.115	0.123	0.126	0.115	0.123	0.121	0.11	0.113	0.118
9039	0.122	0.124	0.119	0.121	0.128	0.129	0.121	0.13	0.128	0.251	0.19	0.128			0.114	0.128	0.121	0.116	0.127	0.123	0.116	0.126	0.121	0.127	0.125		0.123	0.12	0.115	0.122	0.126	0.115	0.122	0.121	0.11	0.114	0.119
9051	0.122	0.124	0.118	0.121	0.128	0.129	0.121	0.13	0.128	0.25	0.188	0.128			0.115	0.127	0.121	0.117	0.127	0.123	0.117	0.126	0.122	0.127	0.124		0.123	0.12	0.115	0.123	0.126	0.115	0.123	0.121	0.111	0.114	0.119
9063	0.122	0.124	0.119	0.121	0.128	0.129	0.121	0.129	0.127	0.25	0.189	0.128			0.115	0.127	0.121	0.116	0.127	0.123	0.117	0.126	0.122	0.127	0.125		0.123	0.12	0.115	0.123	0.126	0.115	0.123	0.121	0.111	0.113	0.119
9075	0.122	0.124	0.118	0.121	0.128	0.129	0.121	0.13	0.128	0.25	0.188	0.128			0.115	0.128	0.121	0.116	0.127	0.123	0.117	0.126	0.121	0.127	0.124		0.123	0.12	0.115	0.123	0.126	0.115	0.123	0.121	0.11	0.113	0.118
9087	0.122	0.124	0.119	0.121	0.128	0.128	0.121	0.13	0.128	0.25	0.187	0.128			0.115	0.127	0.121	0.116	0.127	0.123	0.116	0.126	0.121	0.127	0.125		0.123	0.12	0.115	0.123	0.126	0.115	0.123	0.121	0.111	0.113	0.119
9099	0.122	0.124	0.119	0.121	0.128	0.128	0.121	0.129	0.128	0.249	0.188	0.128			0.114	0.127	0.121	0.116	0.127	0.123	0.117	0.126	0.121	0.127	0.124		0.122	0.12	0.115	0.122	0.126	0.115	0.123	0.121	0.111	0.114	0.119
9111	0.122	0.124	0.119	0.121	0.128	0.128	0.121	0.129	0.127	0.249	0.186	0.129			0.114	0.127	0.12	0.116	0.127	0.123	0.116	0.126	0.121	0.127	0.125		0.123	0.12	0.115	0.123	0.125	0.115	0.123	0.121	0.11	0.113	0.118
9123	0.122	0.124	0.119	0.121	0.128	0.128	0.121	0.129	0.128	0.248	0.188	0.128			0.114	0.127	0.12	0.116	0.127	0.123	0.116	0.126	0.121	0.127	0.124		0.122	0.12	0.115	0.122	0.125	0.115	0.123	0.121	0.111	0.114	0.119
9135	0.122	0.124	0.118	0.121	0.128	0.128	0.121	0.129	0.128	0.248	0.183	0.128			0.114	0.127	0.12	0.116	0.126	0.123	0.116	0.126	0.121	0.127	0.124		0.122	0.12	0.114	0.122	0.125	0.115	0.123	0.121	0.11	0.114	0.118
9147	0.122	0.124	0.119	0.121	0.128	0.128	0.121	0.129	0.128	0.248	0.185	0.128			0.114	0.127	0.121	0.116	0.127	0.123	0.117	0.126	0.121	0.126	0.124		0.123	0.12	0.115	0.122	0.125	0.115	0.123	0.121	0.11	0.113	0.119
9159	0.122	0.124	0.118	0.121	0.128	0.129	0.121	0.129	0.128	0.248	0.185	0.128			0.114	0.127	0.12	0.116	0.127	0.123	0.117	0.126	0.121	0.127	0.124		0.123	0.12	0.115	0.123	0.126	0.115	0.123	0.121	0.11	0.113	0.119
9171	0.122	0.124	0.119	0.121	0.128	0.129	0.121	0.129	0.128	0.247	0.183	0.128			0.114	0.127	0.12	0.116	0.127	0.123	0.116	0.126	0.121	0.127	0.124		0.123	0.12	0.115	0.122	0.125	0.115	0.123	0.121	0.111	0.114	0.119
9183	0.122	0.124	0.118	0.121	0.128	0.129	0.121	0.129	0.128	0.247	0.186	0.128			0.114	0.127	0.12	0.116	0.127	0.124	0.117	0.126	0.121	0.127	0.124		0.122	0.12	0.115	0.123	0.125	0.115	0.123	0.121	0.111	0.113	0.119
9195	0.122	0.124	0.118	0.121	0.128	0.129	0.121	0.129	0.128	0.247	0.182	0.129			0.115	0.127	0.12	0.116	0.127	0.124	0.117	0.126	0.121	0.127	0.124		0.123	0.12	0.115	0.123	0.126	0.114	0.123	0.121	0.111	0.113	0.119
9207	0.122	0.124	0.118	0.121	0.128	0.128	0.121	0.129	0.127	0.247	0.184	0.128			0.114	0.127	0.12	0.116	0.127	0.123	0.116	0.126	0.122	0.127	0.124		0.123	0.12	0.115	0.122	0.125	0.115	0.123	0.121	0.111	0.114	0.118
9219	0.122	0.124	0.118	0.121	0.127	0.128	0.121	0.129	0.128	0.247	0.182	0.128			0.115	0.126	0.121	0.116	0.126	0.123	0.116	0.126	0.122	0.127	0.124		0.122	0.12	0.115	0.122	0.125	0.115	0.122	0.121	0.111	0.113	0.119
9231	0.122	0.124	0.119	0.121	0.127	0.128	0.121	0.13	0.127	0.246	0.182	0.128			0.114	0.127	0.12	0.116	0.127	0.123	0.116	0.126	0.122	0.127	0.124		0.123	0.12	0.115	0.122	0.125	0.115	0.123	0.121	0.111	0.113	0.119
9243	0.122	0.124	0.118	0.121	0.128	0.128	0.121	0.129	0.128	0.246	0.183	0.128			0.115	0.127	0.121	0.116	0.127	0.123	0.117	0.126	0.122	0.127	0.124		0.123	0.12	0.115	0.123	0.126	0.115	0.122	0.121	0.111	0.114	0.119
9255	0.122	0.124	0.118	0.121	0.128	0.128	0.121	0.129	0.127	0.245	0.18	0.128			0.115	0.126	0.121	0.116	0.127	0.123	0.116	0.126	0.121	0.127	0.124		0.123	0.12	0.115	0.123	0.125	0.115	0.122	0.121	0.111	0.114	0.119
9267	0.122	0.124	0.119	0.121	0.128	0.128	0.121	0.129	0.128	0.245	0.182	0.128			0.114	0.126	0.12	0.116	0.127	0.123	0.117	0.126	0.121	0.127	0.124		0.123	0.12	0.115	0.123	0.125	0.115	0.122	0.121	0.11	0.114	0.119
9279	0.122	0.125	0.119	0.121	0.128	0.128	0.121	0.129	0.128	0.245	0.18	0.128			0.114	0.126	0.12	0.116	0.127	0.123	0.117	0.126	0.121	0.127	0.124		0.123	0.12	0.115	0.122	0.125	0.115	0.123	0.121	0.111	0.114	0.119
9291	0.122	0.124	0.118	0.121	0.128	0.128	0.121	0.129	0.127	0.245	0.181	0.128			0.114	0.126	0.121	0.116	0.127	0.123	0.117	0.126	0.121	0.127	0.124		0.123	0.12	0.115	0.123	0.126	0.115	0.123	0.121	0.111	0.113	0.118
9303	0.122	0.125	0.118	0.122	0.128	0.128	0.121	0.13	0.127	0.245	0.178	0.128			0.114	0.126	0.12	0.116	0.127	0.123	0.117	0.126	0.122	0.127	0.124		0.123	0.12	0.115	0.123	0.125	0.115	0.123	0.121	0.11	0.113	0.118
9315	0.122	0.125	0.119	0.121	0.128	0.128	0.121	0.129	0.127	0.244	0.179	0.128			0.114	0.126	0.12	0.116	0.127	0.123	0.116	0.126	0.123	0.127	0.124		0.123	0.12	0.115	0.123	0.125	0.115	0.123	0.121	0.111	0.113	0.119
9327	0.122	0.124	0.118	0.121	0.128	0.128	0.121	0.129	0.128	0.244	0.179	0.128			0.114	0.126	0.12	0.116	0.127	0.123	0.116	0.126	0.123	0.127	0.124		0.123	0.12	0.114	0.123	0.125	0.115	0.123	0.121	0.111	0.113	0.119
9339	0.122	0.125	0.119	0.121	0.128	0.129	0.121	0.129	0.129	0.244	0.178	0.128			0.114	0.126	0.12	0.116	0.127	0.123	0.117	0.126	0.123	0.127	0.124		0.123	0.12	0.115	0.123	0.126	0.115	0.122	0.121	0.11	0.113	0.118
9351	0.122	0.124	0.118	0.121	0.128	0.128	0.121	0.13	0.129	0.243	0.18	0.128			0.114	0.126	0.12	0.117	0.127	0.123	0.116	0.126	0.122	0.127	0.124		0.122	0.12	0.115	0.123	0.126	0.115	0.122	0.121	0.11	0.113	0.118
9363	0.122	0.124	0.118	0.121	0.127	0.128	0.121	0.129	0.13	0.243	0.177	0.128			0.114	0.126	0.12	0.116	0.127	0.123	0.117	0.126	0.122	0.127	0.124		0.122	0.12	0.114	0.123	0.125	0.115	0.122	0.121	0.111	0.113	0.118
9375	0.122	0.124	0.118	0.121	0.128	0.128	0.121	0.129	0.13	0.243	0.178	0.128			0.114	0.126	0.12	0.116	0.127	0.123	0.117	0.126	0.121	0.127	0.124		0.123	0.12	0.115	0.123	0.125	0.115	0.122	0.121	0.111	0.114	0.119
9387	0.122	0.124	0.118	0.121	0.128	0.128	0.121	0.129	0.131	0.242	0.176	0.128			0.114	0.126	0.12	0.116	0.127	0.123	0.117	0.126	0.121	0.127	0.124		0.122	0.12	0.115	0.123	0.125	0.115	0.122	0.121	0.11	0.113	0.119
9399	0.122	0.124	0.118	0.121	0.128	0.128	0.121	0.129	0.132	0.243	0.176	0.128			0.114	0.126	0.12	0.116	0.127	0.123	0.116	0.126	0.121	0.127	0.124		0.122	0.12	0.115	0.122	0.125	0.115	0.123	0.121	0.111	0.114	0.119
9411	0.122	0.124	0.118	0.121	0.127	0.128	0.121	0.129	0.131	0.242	0.176	0.128			0.114	0.126	0.12	0.116	0.127	0.123	0.117	0.126	0.121	0.127	0.123		0.122	0.12	0.114	0.122	0.125	0.115	0.123	0.121	0.111	0.113	0.119
9423	0.122	0.124	0.119	0.122	0.128	0.129	0.121	0.129	0.132	0.242	0.176	0.128			0.114	0.126	0.12	0.117	0.127	0.123	0.117	0.126	0.121	0.127	0.124		0.122	0.12	0.115	0.123	0.125	0.115	0.123	0.121	0.111	0.113	0.119
9435	0.122	0.125	0.118	0.121	0.128	0.128	0.121	0.129	0.131	0.242	0.176	0.128			0.114	0.126	0.12	0.116	0.127	0.123	0.117	0.126	0.121	0.127	0.124		0.123	0.12	0.115	0.122	0.125	0.115	0.123	0.121	0.111	0.114	0.119
9447	0.122	0.124	0.118	0.121	0.128	0.128	0.121	0.129	0.131	0.241	0.174	0.128			0.114	0.126	0.12	0.116	0.127	0.123	0.117	0.126	0.121	0.127	0.124		0.123	0.12	0.115	0.122	0.125	0.115	0.123	0.121	0.111	0.113	0.119
9459	0.122	0.124	0.118	0.121	0.128	0.128	0.121	0.129	0.13	0.241	0.174	0.128			0.114	0.126	0.12	0.116	0.126	0.123	0.116	0.126	0.121	0.127	0.123		0.123	0.12	0.115	0.122	0.125	0.115	0.123	0.121	0.111	0.114	0.12
9471	0.122	0.124	0.119	0.121	0.128	0.128	0.121	0.129	0.129	0.24	0.172	0.128			0.114	0.126	0.12	0.116	0.126	0.123	0.116	0.126	0.121	0.126	0.124		0.123	0.12	0.115	0.123	0.125	0.115	0.123	0.121	0.111	0.114	0.119
9483	0.122	0.124	0.118	0.121	0.128	0.128	0.12	0.129	0.128	0.241	0.175	0.129			0.114	0.126	0.12	0.116	0.127	0.123	0.116	0.126	0.121	0.127	0.124		0.123	0.12	0.116	0.122	0.126	0.115	0.123	0.121	0.111	0.114	0.119
9495	0.122	0.125	0.119	0.121	0.128	0.128	0.121	0.129	0.128	0.24	0.173	0.128			0.114	0.126	0.12	0.116	0.127	0.123	0.116	0.126	0.121	0.127	0.123		0.123	0.12	0.115	0.122	0.125	0.115	0.123	0.121	0.111	0.113	0.119
9507	0.122	0.124	0.118	0.121	0.128	0.128	0.121	0.129	0.128	0.24	0.172	0.128			0.114	0.126	0.12	0.116	0.126	0.123	0.116	0.126	0.121	0.127	0.123		0.123	0.12	0.115	0.122	0.125	0.115	0.123	0.121	0.11	0.114	0.119
9519	0.122	0.124	0.118	0.121	0.128	0.129	0.121	0.129	0.127	0.24	0.173	0.128			0.114	0.126	0.12	0.116	0.127	0.123	0.117	0.126	0.121	0.127	0.123		0.123	0.12	0.115	0.123	0.126	0.115	0.123	0.121	0.11	0.114	0.119
9531	0.122	0.125	0.118	0.121	0.128	0.128	0.121	0.129	0.127	0.239	0.172	0.128			0.114	0.126	0.12	0.116	0.127	0.123	0.116	0.126	0.121	0.127	0.124		0.122	0.12	0.115	0.122	0.125	0.115	0.123	0.121	0.111	0.114	0.119
9543	0.122	0.124	0.118	0.121	0.127	0.128	0.121	0.129	0.128	0.239	0.172	0.128			0.114	0.125	0.12	0.116	0.127	0.123	0.116	0.126	0.121	0.127	0.123		0.122	0.12	0.115	0.122	0.125	0.115	0.123	0.121	0.111	0.114	0.118
9555	0.122	0.124	0.118	0.121	0.128	0.128	0.121	0.129	0.127	0.238	0.171	0.128			0.114	0.125	0.12	0.116	0.127	0.123	0.116	0.126	0.121	0.127	0.123		0.123	0.12	0.115	0.123	0.125	0.115	0.122	0.121	0.11	0.114	0.118
9567	0.122	0.125	0.118	0.121	0.128	0.128	0.121	0.129	0.128	0.238	0.171	0.128			0.114	0.125	0.12	0.116	0.127	0.123	0.117	0.126	0.121	0.127	0.123		0.122	0.12	0.115	0.123	0.125	0.115	0.123	0.121	0.11	0.114	0.119
9579	0.122	0.124	0.118	0.121	0.128	0.128	0.121	0.13	0.127	0.238	0.17	0.128			0.114	0.126	0.12	0.116	0.127	0.123	0.117	0.126	0.121	0.126	0.123		0.123	0.12	0.115	0.122	0.126	0.115	0.123	0.121	0.111	0.113	0.119
9591	0.122	0.125	0.118	0.121	0.128	0.128	0.121	0.129	0.127	0.238	0.171	0.128			0.114	0.126	0.12	0.116	0.127	0.123	0.117	0.126	0.121	0.127	0.123		0.123	0.12	0.115	0.122	0.125	0.115	0.123	0.121	0.111	0.114	0.119
9603	0.122	0.125	0.118	0.121	0.128	0.128	0.121	0.129	0.127	0.237	0.169	0.128			0.114	0.126	0.12	0.116	0.127	0.123	0.116	0.126	0.121	0.127	0.123		0.123	0.12	0.115	0.122	0.125	0.115	0.123	0.121	0.111	0.114	0.119
9615	0.122	0.124	0.118	0.121	0.128	0.128	0.121	0.129	0.127	0.237	0.171	0.129			0.114	0.125	0.12	0.116	0.127	0.123	0.116	0.126	0.121	0.127	0.123		0.122	0.12	0.115	0.123	0.125	0.115	0.123	0.121	0.11	0.114	0.118
9627	0.122	0.125	0.118	0.121	0.128	0.128	0.121	0.129	0.127	0.237	0.168	0.128			0.114	0.126	0.12	0.116	0.127	0.123	0.116	0.126	0.121	0.127	0.123		0.123	0.12	0.114	0.122	0.125	0.115	0.123	0.121	0.11	0.114	0.119
9639	0.122	0.125	0.118	0.122	0.128	0.129	0.121	0.129	0.127	0.236	0.169	0.128			0.114	0.126	0.12	0.117	0.127	0.123	0.116	0.126	0.121	0.127	0.124		0.123	0.12	0.115	0.123	0.125	0.115	0.123	0.121	0.11	0.113	0.119
9651	0.122	0.124	0.118	0.121	0.128	0.128	0.121	0.129	0.128	0.236	0.169	0.128			0.114	0.125	0.12	0.117	0.127	0.123	0.116	0.126	0.121	0.127	0.123		0.122	0.12	0.115	0.123	0.125	0.115	0.123	0.121	0.111	0.113	0.119
9663	0.122	0.124	0.119	0.121	0.127	0.128	0.121	0.129	0.129	0.236	0.167	0.128			0.114	0.126	0.12	0.116	0.126	0.123	0.116	0.126	0.121	0.126	0.123		0.123	0.12	0.114	0.123	0.125	0.115	0.123	0.121	0.111	0.113	0.119
9675	0.122	0.124	0.119	0.121	0.128	0.128	0.121	0.129	0.128	0.235	0.169	0.128			0.114	0.125	0.12	0.116	0.127	0.123	0.116	0.126	0.121	0.127	0.123		0.123	0.12	0.115	0.122	0.125	0.115	0.123	0.121	0.111	0.114	0.119
9687	0.122	0.125	0.118	0.121	0.128	0.128	0.121	0.129	0.128	0.235	0.167	0.128			0.114	0.125	0.12	0.116	0.126	0.123	0.116	0.126	0.121	0.126	0.123		0.123	0.12	0.115	0.122	0.125	0.115	0.123	0.121	0.111	0.114	0.119
9699	0.122	0.125	0.118	0.121	0.128	0.128	0.121	0.129	0.128	0.235	0.168	0.128			0.114	0.125	0.12	0.116	0.127	0.123	0.116	0.126	0.121	0.127	0.123		0.123	0.12	0.115	0.122	0.125	0.115	0.123	0.121	0.11	0.113	0.119
9711	0.122	0.124	0.118	0.121	0.128	0.128	0.121	0.129	0.131	0.235	0.166	0.128			0.114	0.125	0.12	0.116	0.127	0.123	0.116	0.126	0.121	0.127	0.123		0.123	0.12	0.115	0.123	0.125	0.115	0.123	0.121	0.11	0.113	0.119
9723	0.122	0.124	0.118	0.121	0.128	0.129	0.121	0.129	0.133	0.235	0.166	0.129			0.114	0.125	0.12	0.116	0.127	0.123	0.116	0.126	0.121	0.127	0.123		0.123	0.12	0.115	0.123	0.126	0.115	0.123	0.121	0.11	0.113	0.119
9735	0.122	0.124	0.118	0.121	0.127	0.128	0.121	0.129	0.13	0.234	0.166	0.128			0.114	0.125	0.12	0.116	0.127	0.123	0.116	0.126	0.121	0.127	0.123		0.122	0.12	0.115	0.123	0.125	0.115	0.123	0.121	0.111	0.113	0.119
9747	0.122	0.125	0.118	0.121	0.128	0.128	0.121	0.129	0.128	0.234	0.165	0.128			0.114	0.125	0.12	0.116	0.126	0.123	0.117	0.126	0.121	0.127	0.123		0.122	0.12	0.115	0.123	0.125	0.115	0.122	0.121	0.11	0.113	0.119
9759	0.122	0.125	0.119	0.121	0.128	0.128	0.121	0.129	0.128	0.233	0.165	0.128			0.114	0.125	0.12	0.116	0.127	0.123	0.116	0.126	0.121	0.127	0.123		0.123	0.12	0.115	0.123	0.125	0.115	0.123	0.121	0.11	0.113	0.119
9771	0.123	0.125	0.119	0.121	0.128	0.128	0.121	0.129	0.127	0.233	0.165	0.128			0.114	0.126	0.12	0.116	0.127	0.123	0.117	0.127	0.121	0.127	0.123		0.123	0.12	0.115	0.123	0.125	0.115	0.123	0.121	0.11	0.113	0.119
9783	0.122	0.124	0.118	0.121	0.128	0.128	0.121	0.129	0.128	0.232	0.164	0.128			0.114	0.125	0.12	0.116	0.127	0.123	0.117	0.127	0.121	0.126	0.123		0.122	0.12	0.115	0.122	0.125	0.115	0.123	0.121	0.111	0.113	0.119
9795	0.122	0.125	0.119	0.121	0.127	0.128	0.121	0.129	0.127	0.233	0.165	0.128			0.114	0.125	0.12	0.116	0.126	0.123	0.116	0.127	0.121	0.127	0.123		0.123	0.12	0.115	0.122	0.125	0.115	0.123	0.121	0.11	0.113	0.118
9807	0.122	0.124	0.118	0.121	0.127	0.128	0.121	0.129	0.127	0.232	0.163	0.129			0.114	0.125	0.12	0.116	0.126	0.123	0.116	0.127	0.121	0.127	0.123		0.123	0.12	0.114	0.122	0.125	0.115	0.123	0.121	0.111	0.113	0.119
9819	0.122	0.124	0.118	0.121	0.128	0.128	0.121	0.129	0.127	0.232	0.163	0.128			0.114	0.125	0.12	0.117	0.127	0.123	0.116	0.127	0.121	0.127	0.123		0.123	0.12	0.115	0.122	0.125	0.115	0.123	0.121	0.111	0.114	0.119
9831	0.122	0.124	0.118	0.121	0.127	0.128	0.121	0.129	0.127	0.232	0.164	0.128			0.114	0.126	0.12	0.116	0.126	0.123	0.116	0.127	0.121	0.127	0.123		0.122	0.121	0.114	0.122	0.125	0.115	0.122	0.121	0.11	0.114	0.119
9843	0.122	0.125	0.118	0.121	0.128	0.128	0.121	0.129	0.127	0.232	0.163	0.128			0.114	0.125	0.12	0.116	0.127	0.123	0.116	0.126	0.12	0.127	0.123		0.122	0.12	0.115	0.123	0.125	0.115	0.122	0.121	0.111	0.113	0.119
9855	0.122	0.124	0.118	0.121	0.127	0.128	0.121	0.129	0.127	0.231	0.163	0.128			0.114	0.125	0.12	0.116	0.127	0.123	0.116	0.126	0.121	0.127	0.123		0.122	0.12	0.115	0.122	0.125	0.115	0.122	0.121	0.111	0.113	0.119
9867	0.122	0.125	0.118	0.121	0.127	0.128	0.121	0.129	0.127	0.231	0.161	0.128			0.114	0.125	0.12	0.116	0.126	0.123	0.116	0.126	0.121	0.127	0.123		0.123	0.12	0.115	0.122	0.125	0.115	0.122	0.121	0.111	0.114	0.119
9879	0.122	0.125	0.118	0.121	0.128	0.128	0.12	0.129	0.127	0.231	0.163	0.129			0.114	0.126	0.12	0.116	0.127	0.123	0.116	0.126	0.121	0.127	0.123		0.122	0.121	0.115	0.122	0.126	0.115	0.123	0.121	0.111	0.114	0.118
9891	0.122	0.124	0.118	0.121	0.128	0.128	0.121	0.129	0.128	0.23	0.16	0.128			0.114	0.125	0.12	0.116	0.127	0.123	0.117	0.126	0.121	0.127	0.123		0.123	0.12	0.115	0.122	0.125	0.115	0.123	0.121	0.111	0.113	0.119
9903	0.122	0.124	0.118	0.121	0.128	0.128	0.12	0.129	0.127	0.23	0.162	0.128			0.114	0.125	0.12	0.116	0.127	0.123	0.116	0.126	0.121	0.127	0.123		0.122	0.12	0.114	0.122	0.125	0.115	0.123	0.121	0.111	0.114	0.119
9915	0.122	0.124	0.118	0.121	0.128	0.128	0.12	0.129	0.127	0.23	0.16	0.128			0.114	0.125	0.12	0.116	0.127	0.123	0.117	0.126	0.121	0.127	0.123		0.122	0.12	0.114	0.122	0.125	0.115	0.123	0.121	0.11	0.113	0.119
9927	0.122	0.125	0.118	0.121	0.128	0.128	0.121	0.129	0.127	0.229	0.159	0.128			0.114	0.125	0.12	0.116	0.127	0.123	0.116	0.126	0.121	0.127	0.123		0.122	0.12	0.114	0.122	0.125	0.115	0.123	0.121	0.111	0.114	0.119
9939	0.122	0.125	0.118	0.121	0.128	0.128	0.121	0.129	0.127	0.229	0.161	0.128			0.114	0.125	0.12	0.116	0.127	0.123	0.116	0.126	0.121	0.127	0.123		0.122	0.12	0.114	0.122	0.125	0.115	0.122	0.121	0.11	0.114	0.119
9951	0.122	0.125	0.118	0.121	0.128	0.128	0.121	0.129	0.127	0.228	0.159	0.128			0.114	0.125	0.12	0.116	0.127	0.123	0.116	0.126	0.121	0.127	0.123		0.123	0.12	0.115	0.122	0.125	0.115	0.123	0.121	0.11	0.114	0.119
9963	0.122	0.125	0.118	0.121	0.128	0.128	0.121	0.129	0.127	0.228	0.159	0.128			0.114	0.125	0.12	0.116	0.127	0.123	0.116	0.126	0.121	0.127	0.123		0.123	0.12	0.115	0.122	0.125	0.115	0.122	0.121	0.11	0.114	0.118
9975	0.122	0.124	0.119	0.121	0.128	0.128	0.121	0.129	0.127	0.228	0.159	0.128			0.114	0.125	0.12	0.116	0.127	0.123	0.116	0.126	0.121	0.126	0.123		0.123	0.12	0.115	0.122	0.126	0.115	0.123	0.121	0.111	0.114	0.119
9987	0.122	0.124	0.118	0.121	0.128	0.128	0.121	0.129	0.127	0.228	0.158	0.128			0.113	0.125	0.12	0.116	0.126	0.123	0.116	0.126	0.121	0.126	0.123		0.122	0.12	0.115	0.122	0.125	0.115	0.123	0.121	0.111	0.114	0.118
9999	0.122	0.125	0.118	0.122	0.127	0.128	0.121	0.129	0.127	0.228	0.159	0.128			0.114	0.125	0.12	0.116	0.127	0.123	0.116	0.126	0.121	0.127	0.123		0.122	0.12	0.115	0.122	0.125	0.115	0.123	0.121	0.111	0.114	0.119
10011	0.122	0.125	0.118	0.121	0.127	0.128	0.121	0.129	0.128	0.227	0.158	0.128			0.114	0.125	0.12	0.116	0.126	0.123	0.116	0.126	0.121	0.127	0.123		0.122	0.12	0.115	0.122	0.125	0.115	0.123	0.121	0.111	0.113	0.119
10023	0.122	0.124	0.118	0.121	0.128	0.128	0.121	0.129	0.128	0.227	0.159	0.128			0.114	0.125	0.12	0.116	0.126	0.123	0.116	0.126	0.121	0.127	0.123		0.122	0.12	0.114	0.122	0.125	0.115	0.122	0.121	0.111	0.114	0.119
10035	0.122	0.125	0.118	0.121	0.127	0.128	0.121	0.129	0.128	0.226	0.157	0.128			0.114	0.125	0.12	0.116	0.126	0.123	0.117	0.126	0.121	0.127	0.123		0.122	0.12	0.114	0.123	0.125	0.115	0.122	0.121	0.111	0.114	0.119
10047	0.122	0.125	0.118	0.121	0.127	0.128	0.121	0.129	0.128	0.226	0.157	0.128			0.114	0.125	0.12	0.116	0.126	0.123	0.116	0.126	0.121	0.127	0.123		0.123	0.12	0.114	0.123	0.125	0.115	0.123	0.121	0.11	0.114	0.118
10059	0.122	0.125	0.118	0.121	0.128	0.128	0.121	0.129	0.127	0.226	0.156	0.128			0.114	0.125	0.12	0.116	0.126	0.123	0.116	0.126	0.12	0.127	0.123		0.123	0.12	0.115	0.122	0.125	0.115	0.122	0.121	0.11	0.113	0.119
10071	0.122	0.124	0.118	0.121	0.128	0.129	0.121	0.129	0.127	0.226	0.156	0.128			0.114	0.125	0.12	0.116	0.126	0.123	0.116	0.126	0.121	0.127	0.123		0.122	0.12	0.115	0.122	0.126	0.115	0.123	0.121	0.111	0.114	0.119
10083	0.122	0.124	0.118	0.121	0.128	0.129	0.121	0.129	0.128	0.226	0.156	0.128			0.114	0.125	0.12	0.116	0.126	0.123	0.116	0.126	0.121	0.127	0.123		0.122	0.12	0.114	0.122	0.125	0.115	0.123	0.121	0.11	0.113	0.119
10095	0.122	0.125	0.118	0.121	0.128	0.129	0.121	0.129	0.128	0.225	0.155	0.128			0.114	0.125	0.12	0.116	0.126	0.123	0.116	0.127	0.121	0.126	0.123		0.123	0.12	0.115	0.123	0.126	0.115	0.123	0.121	0.111	0.113	0.118
10107	0.122	0.125	0.118	0.121	0.129	0.128	0.121	0.129	0.128	0.225	0.156	0.128			0.114	0.125	0.12	0.116	0.127	0.123	0.116	0.127	0.121	0.127	0.123		0.122	0.12	0.115	0.123	0.126	0.115	0.122	0.121	0.11	0.114	0.118
10119	0.122	0.124	0.118	0.121	0.128	0.128	0.121	0.129	0.128	0.224	0.155	0.128			0.114	0.125	0.12	0.116	0.127	0.123	0.116	0.127	0.121	0.127	0.123		0.122	0.12	0.115	0.123	0.126	0.115	0.123	0.121	0.11	0.113	0.119
10131	0.122	0.125	0.118	0.121	0.128	0.128	0.121	0.129	0.128	0.224	0.155	0.128			0.114	0.125	0.12	0.116	0.127	0.123	0.116	0.127	0.121	0.127	0.123		0.122	0.12	0.115	0.122	0.125	0.115	0.123	0.121	0.11	0.113	0.118
10143	0.122	0.124	0.118	0.121	0.129	0.128	0.121	0.129	0.128	0.223	0.154	0.128			0.114	0.125	0.12	0.116	0.126	0.123	0.116	0.126	0.121	0.126	0.123		0.122	0.12	0.115	0.122	0.125	0.115	0.123	0.121	0.11	0.114	0.119
10155	0.122	0.124	0.118	0.121	0.128	0.129	0.121	0.129	0.128	0.224	0.155	0.128			0.114	0.125	0.12	0.116	0.127	0.123	0.116	0.126	0.121	0.127	0.123		0.122	0.12	0.115	0.123	0.125	0.115	0.122	0.121	0.11	0.113	0.119
10167	0.122	0.125	0.118	0.121	0.128	0.128	0.121	0.129	0.129	0.223	0.153	0.128			0.114	0.125	0.12	0.116	0.126	0.123	0.116	0.126	0.121	0.127	0.123		0.122	0.12	0.114	0.122	0.125	0.115	0.123	0.121	0.111	0.113	0.119
10179	0.122	0.124	0.118	0.121	0.128	0.128	0.121	0.129	0.128	0.222	0.153	0.128			0.114	0.125	0.12	0.116	0.127	0.123	0.116	0.126	0.121	0.126	0.123		0.122	0.12	0.115	0.123	0.125	0.115	0.122	0.121	0.111	0.114	0.119
10191	0.122	0.124	0.118	0.121	0.128	0.128	0.121	0.129	0.128	0.222	0.154	0.128			0.114	0.125	0.12	0.116	0.126	0.123	0.116	0.126	0.121	0.127	0.123		0.122	0.12	0.114	0.122	0.125	0.115	0.122	0.121	0.11	0.114	0.119
10203	0.122	0.125	0.118	0.121	0.128	0.128	0.12	0.129	0.127	0.222	0.153	0.129			0.114	0.125	0.12	0.116	0.126	0.123	0.116	0.126	0.121	0.126	0.123		0.122	0.12	0.115	0.122	0.126	0.115	0.122	0.121	0.111	0.113	0.119
10215	0.122	0.124	0.118	0.121	0.128	0.128	0.121	0.129	0.128	0.222	0.154	0.128			0.114	0.125	0.12	0.116	0.126	0.123	0.117	0.126	0.121	0.127	0.124		0.122	0.12	0.115	0.122	0.125	0.115	0.122	0.121	0.111	0.113	0.119
10227	0.122	0.124	0.118	0.121	0.128	0.128	0.121	0.129	0.128	0.222	0.152	0.129			0.114	0.125	0.12	0.116	0.126	0.123	0.116	0.126	0.121	0.127	0.123		0.122	0.12	0.115	0.122	0.125	0.115	0.122	0.121	0.11	0.114	0.119
10239	0.122	0.124	0.118	0.121	0.128	0.128	0.121	0.129	0.128	0.222	0.152	0.128			0.114	0.125	0.12	0.116	0.127	0.123	0.116	0.126	0.121	0.127	0.123		0.122	0.12	0.115	0.122	0.125	0.115	0.122	0.121	0.111	0.113	0.119
10251	0.122	0.125	0.118	0.121	0.127	0.128	0.121	0.129	0.128	0.221	0.152	0.128			0.114	0.125	0.12	0.116	0.127	0.123	0.116	0.126	0.121	0.127	0.123		0.123	0.12	0.114	0.122	0.125	0.115	0.122	0.121	0.111	0.113	0.119
10263	0.122	0.124	0.118	0.121	0.128	0.128	0.121	0.129	0.127	0.219	0.151	0.128			0.114	0.125	0.12	0.116	0.127	0.123	0.116	0.126	0.121	0.126	0.123		0.122	0.12	0.115	0.123	0.125	0.115	0.122	0.121	0.11	0.113	0.119
10275	0.122	0.124	0.118	0.121	0.128	0.128	0.121	0.129	0.127	0.221	0.153	0.128			0.114	0.125	0.12	0.116	0.126	0.123	0.116	0.126	0.121	0.127	0.123		0.122	0.12	0.115	0.122	0.125	0.115	0.122	0.121	0.11	0.113	0.119
10287	0.122	0.125	0.119	0.121	0.128	0.128	0.121	0.129	0.128	0.22	0.151	0.128			0.114	0.125	0.12	0.116	0.126	0.123	0.116	0.127	0.121	0.126	0.123		0.123	0.12	0.115	0.122	0.125	0.115	0.122	0.121	0.11	0.113	0.119
10299	0.122	0.124	0.118	0.121	0.128	0.128	0.121	0.129	0.127	0.22	0.15	0.128			0.113	0.125	0.12	0.116	0.126	0.123	0.116	0.127	0.121	0.126	0.123		0.122	0.12	0.114	0.122	0.125	0.115	0.122	0.121	0.11	0.114	0.118
10311	0.122	0.124	0.118	0.121	0.127	0.128	0.121	0.129	0.127	0.219	0.15	0.128			0.114	0.125	0.12	0.116	0.126	0.123	0.116	0.127	0.121	0.127	0.123		0.122	0.12	0.114	0.122	0.125	0.115	0.123	0.121	0.111	0.114	0.119
10323	0.122	0.124	0.118	0.121	0.128	0.128	0.121	0.129	0.127	0.218	0.15	0.128			0.114	0.125	0.12	0.116	0.126	0.123	0.116	0.126	0.121	0.126	0.123		0.122	0.12	0.115	0.123	0.125	0.115	0.123	0.121	0.111	0.114	0.119
10335	0.122	0.124	0.118	0.121	0.128	0.128	0.12	0.129	0.127	0.219	0.151	0.129			0.114	0.125	0.12	0.116	0.126	0.123	0.116	0.126	0.121	0.126	0.123		0.122	0.12	0.115	0.123	0.125	0.115	0.122	0.121	0.11	0.113	0.119
10347	0.122	0.124	0.118	0.121	0.128	0.128	0.121	0.129	0.127	0.218	0.149	0.128			0.114	0.125	0.12	0.116	0.126	0.123	0.116	0.126	0.121	0.127	0.123		0.122	0.12	0.114	0.122	0.125	0.115	0.123	0.121	0.111	0.113	0.119
10359	0.122	0.124	0.118	0.121	0.128	0.129	0.121	0.129	0.127	0.218	0.149	0.128			0.114	0.125	0.12	0.116	0.127	0.123	0.116	0.126	0.121	0.126	0.123		0.123	0.12	0.115	0.123	0.125	0.115	0.122	0.121	0.111	0.113	0.119
10371	0.122	0.124	0.118	0.121	0.127	0.128	0.121	0.129	0.127	0.217	0.15	0.128			0.114	0.125	0.12	0.116	0.126	0.123	0.117	0.126	0.121	0.127	0.123		0.122	0.12	0.114	0.122	0.125	0.115	0.122	0.121	0.11	0.114	0.118
10383	0.122	0.125	0.118	0.121	0.128	0.128	0.121	0.129	0.127	0.217	0.149	0.129			0.114	0.125	0.12	0.116	0.126	0.123	0.116	0.127	0.121	0.127	0.123		0.122	0.12	0.114	0.122	0.125	0.115	0.122	0.121	0.111	0.113	0.119
10395	0.122	0.124	0.118	0.121	0.128	0.128	0.121	0.129	0.127	0.217	0.15	0.128			0.114	0.125	0.12	0.116	0.126	0.123	0.116	0.127	0.121	0.127	0.123		0.122	0.12	0.115	0.122	0.125	0.115	0.123	0.121	0.111	0.114	0.119
10407	0.122	0.124	0.118	0.121	0.128	0.129	0.121	0.129	0.127	0.216	0.148	0.129			0.114	0.125	0.12	0.116	0.127	0.123	0.116	0.126	0.121	0.126	0.123		0.122	0.12	0.115	0.122	0.125	0.115	0.123	0.121	0.11	0.113	0.119
10419	0.122	0.124	0.118	0.121	0.128	0.128	0.121	0.129	0.127	0.217	0.149	0.128			0.114	0.125	0.12	0.116	0.126	0.123	0.116	0.126	0.121	0.126	0.123		0.122	0.12	0.114	0.122	0.125	0.115	0.122	0.121	0.111	0.113	0.119
10431	0.122	0.124	0.118	0.121	0.128	0.128	0.12	0.129	0.128	0.216	0.148	0.128			0.113	0.125	0.12	0.116	0.126	0.123	0.116	0.125	0.121	0.126	0.123		0.122	0.12	0.115	0.122	0.125	0.115	0.122	0.121	0.111	0.113	0.119
10443	0.122	0.124	0.118	0.121	0.128	0.128	0.121	0.129	0.128	0.215	0.147	0.128			0.114	0.125	0.12	0.116	0.126	0.123	0.116	0.125	0.121	0.126	0.123		0.122	0.12	0.114	0.122	0.125	0.115	0.123	0.121	0.111	0.114	0.119
10455	0.122	0.124	0.118	0.121	0.128	0.129	0.121	0.129	0.128	0.216	0.148	0.128			0.114	0.125	0.12	0.116	0.127	0.123	0.116	0.126	0.121	0.126	0.123		0.122	0.12	0.115	0.122	0.125	0.115	0.122	0.121	0.11	0.114	0.118
10467	0.122	0.124	0.118	0.121	0.128	0.129	0.121	0.129	0.127	0.215	0.147	0.128			0.114	0.125	0.12	0.116	0.127	0.123	0.116	0.126	0.121	0.126	0.123		0.123	0.12	0.114	0.122	0.125	0.115	0.123	0.121	0.11	0.114	0.118
10479	0.122	0.125	0.118	0.121	0.127	0.128	0.121	0.129	0.128	0.215	0.148	0.128			0.114	0.125	0.12	0.116	0.127	0.123	0.116	0.126	0.12	0.126	0.123		0.122	0.12	0.115	0.122	0.125	0.115	0.122	0.121	0.11	0.115	0.119
10491	0.122	0.124	0.118	0.121	0.127	0.128	0.121	0.129	0.128	0.214	0.147	0.128			0.114	0.125	0.12	0.116	0.127	0.123	0.116	0.125	0.121	0.126	0.123		0.123	0.12	0.114	0.122	0.125	0.115	0.123	0.121	0.111	0.115	0.119
10503	0.122	0.124	0.118	0.121	0.128	0.129	0.121	0.129	0.127	0.215	0.146	0.128			0.114	0.125	0.12	0.116	0.126	0.123	0.116	0.125	0.121	0.126	0.123		0.122	0.12	0.115	0.122	0.125	0.115	0.123	0.121	0.111	0.115	0.119
10515	0.122	0.124	0.118	0.121	0.127	0.128	0.121	0.129	0.127	0.214	0.147	0.128			0.114	0.125	0.12	0.116	0.126	0.123	0.116	0.126	0.121	0.127	0.123		0.122	0.119	0.115	0.122	0.125	0.115	0.123	0.121	0.111	0.115	0.119
10527	0.122	0.124	0.118	0.121	0.127	0.128	0.121	0.129	0.127	0.213	0.146	0.128			0.114	0.125	0.12	0.116	0.127	0.123	0.116	0.125	0.121	0.127	0.123		0.122	0.12	0.115	0.122	0.125	0.115	0.122	0.121	0.11	0.115	0.118
10539	0.122	0.124	0.118	0.121	0.127	0.128	0.121	0.129	0.127	0.213	0.147	0.128			0.114	0.125	0.12	0.116	0.127	0.123	0.116	0.126	0.121	0.126	0.123		0.122	0.12	0.115	0.122	0.125	0.115	0.123	0.121	0.111	0.115	0.119
10551	0.122	0.124	0.118	0.121	0.127	0.128	0.121	0.129	0.128	0.213	0.145	0.129			0.114	0.125	0.12	0.116	0.126	0.123	0.116	0.126	0.121	0.127	0.123		0.122	0.12	0.115	0.122	0.125	0.115	0.122	0.121	0.11	0.115	0.119
10563	0.122	0.125	0.118	0.121	0.127	0.128	0.121	0.129	0.127	0.213	0.145	0.128			0.114	0.125	0.12	0.116	0.126	0.123	0.116	0.125	0.121	0.126	0.124		0.122	0.12	0.115	0.122	0.126	0.115	0.122	0.121	0.11	0.115	0.119
10575	0.122	0.125	0.118	0.121	0.127	0.128	0.121	0.129	0.127	0.213	0.145	0.128			0.114	0.125	0.12	0.116	0.126	0.123	0.116	0.126	0.121	0.127	0.123		0.122	0.12	0.115	0.122	0.125	0.115	0.122	0.12	0.111	0.115	0.119
10587	0.122	0.124	0.118	0.121	0.127	0.128	0.121	0.129	0.127	0.212	0.145	0.128			0.114	0.125	0.12	0.116	0.127	0.123	0.117	0.125	0.121	0.126	0.123		0.122	0.12	0.114	0.122	0.125	0.115	0.122	0.121	0.11	0.115	0.119
10599	0.122	0.125	0.118	0.121	0.127	0.128	0.121	0.129	0.127	0.212	0.145	0.128			0.114	0.125	0.12	0.116	0.127	0.123	0.116	0.125	0.121	0.126	0.123		0.122	0.12	0.114	0.123	0.125	0.115	0.122	0.121	0.111	0.114	0.119
10611	0.122	0.124	0.118	0.121	0.127	0.128	0.121	0.129	0.127	0.211	0.144	0.128			0.114	0.125	0.12	0.116	0.126	0.123	0.116	0.126	0.121	0.126	0.123		0.122	0.12	0.114	0.122	0.125	0.115	0.122	0.121	0.111	0.114	0.119
10623	0.122	0.125	0.118	0.121	0.127	0.129	0.121	0.129	0.127	0.21	0.145	0.128			0.114	0.125	0.12	0.116	0.126	0.123	0.116	0.125	0.121	0.127	0.123		0.122	0.12	0.115	0.122	0.125	0.115	0.123	0.121	0.111	0.113	0.119
10635	0.122	0.124	0.118	0.121	0.127	0.128	0.121	0.129	0.127	0.21	0.144	0.128			0.114	0.125	0.12	0.116	0.126	0.123	0.116	0.126	0.121	0.127	0.123		0.122	0.12	0.115	0.122	0.125	0.115	0.122	0.121	0.111	0.114	0.119
10647	0.122	0.125	0.118	0.121	0.127	0.128	0.121	0.129	0.127	0.21	0.145	0.128			0.114	0.125	0.12	0.116	0.126	0.123	0.116	0.126	0.121	0.126	0.123		0.122	0.12	0.115	0.122	0.125	0.115	0.123	0.121	0.11	0.113	0.118
10659	0.122	0.125	0.118	0.121	0.127	0.128	0.12	0.129	0.127	0.209	0.144	0.128			0.114	0.125	0.12	0.116	0.126	0.123	0.116	0.126	0.121	0.126	0.123		0.123	0.12	0.115	0.122	0.125	0.115	0.123	0.121	0.111	0.114	0.119
10671	0.122	0.124	0.118	0.121	0.127	0.128	0.121	0.129	0.127	0.21	0.144	0.128			0.114	0.125	0.12	0.116	0.126	0.123	0.116	0.125	0.121	0.126	0.123		0.122	0.12	0.114	0.122	0.125	0.115	0.122	0.121	0.111	0.113	0.119
10683	0.122	0.125	0.118	0.121	0.127	0.128	0.121	0.129	0.127	0.209	0.143	0.128			0.114	0.125	0.12	0.116	0.126	0.123	0.116	0.126	0.121	0.127	0.123		0.122	0.12	0.114	0.122	0.125	0.115	0.123	0.121	0.111	0.113	0.118
10695	0.122	0.124	0.118	0.121	0.128	0.128	0.121	0.129	0.128	0.209	0.142	0.129			0.114	0.125	0.12	0.116	0.126	0.123	0.116	0.126	0.121	0.127	0.123		0.123	0.12	0.115	0.122	0.125	0.115	0.122	0.121	0.111	0.114	0.119
10707	0.122	0.124	0.118	0.121	0.127	0.128	0.121	0.129	0.127	0.209	0.143	0.128			0.114	0.125	0.12	0.116	0.126	0.123	0.116	0.126	0.121	0.127	0.123		0.122	0.12	0.115	0.122	0.125	0.115	0.123	0.121	0.11	0.114	0.119
10719	0.122	0.124	0.118	0.121	0.128	0.129	0.121	0.129	0.127	0.208	0.142	0.128			0.114	0.125	0.12	0.116	0.126	0.123	0.116	0.126	0.121	0.126	0.123		0.122	0.12	0.115	0.122	0.125	0.115	0.123	0.121	0.111	0.114	0.119
10731	0.122	0.124	0.118	0.121	0.127	0.128	0.121	0.128	0.127	0.208	0.143	0.128			0.114	0.125	0.12	0.116	0.126	0.123	0.116	0.126	0.121	0.126	0.123		0.122	0.12	0.115	0.122	0.125	0.115	0.122	0.121	0.111	0.113	0.118
10743	0.122	0.124	0.118	0.121	0.128	0.128	0.121	0.129	0.127	0.207	0.142	0.128			0.114	0.125	0.12	0.116	0.126	0.123	0.116	0.125	0.121	0.126	0.123		0.122	0.12	0.115	0.122	0.125	0.115	0.122	0.12	0.111	0.114	0.119
10755	0.122	0.125	0.118	0.121	0.127	0.128	0.121	0.129	0.127	0.207	0.142	0.128			0.114	0.125	0.12	0.116	0.126	0.123	0.116	0.126	0.121	0.126	0.123		0.122	0.12	0.114	0.122	0.125	0.115	0.123	0.121	0.11	0.114	0.119
10767	0.122	0.124	0.118	0.121	0.127	0.128	0.121	0.129	0.127	0.206	0.141	0.128			0.114	0.125	0.12	0.116	0.126	0.123	0.116	0.125	0.12	0.126	0.123		0.122	0.12	0.115	0.122	0.125	0.115	0.123	0.121	0.11	0.114	0.119
10779	0.121	0.124	0.118	0.121	0.127	0.128	0.121	0.129	0.127	0.206	0.141	0.128			0.113	0.125	0.12	0.116	0.126	0.123	0.116	0.126	0.121	0.127	0.123		0.122	0.119	0.115	0.122	0.125	0.115	0.123	0.121	0.11	0.114	0.119
10791	0.122	0.124	0.118	0.121	0.127	0.128	0.121	0.129	0.128	0.207	0.142	0.128			0.114	0.125	0.12	0.116	0.126	0.123	0.116	0.125	0.121	0.126	0.123		0.123	0.12	0.115	0.122	0.125	0.115	0.122	0.121	0.11	0.114	0.119
10803	0.122	0.124	0.118	0.121	0.128	0.128	0.121	0.129	0.128	0.205	0.141	0.128			0.114	0.125	0.12	0.116	0.126	0.123	0.116	0.125	0.121	0.126	0.123		0.122	0.119	0.115	0.122	0.125	0.115	0.122	0.121	0.111	0.114	0.118
10815	0.122	0.124	0.118	0.121	0.128	0.128	0.121	0.129	0.128	0.205	0.142	0.128			0.114	0.125	0.12	0.116	0.127	0.123	0.116	0.125	0.12	0.127	0.123		0.122	0.12	0.115	0.123	0.125	0.115	0.122	0.121	0.111	0.113	0.119
10827	0.121	0.124	0.118	0.121	0.127	0.128	0.121	0.129	0.128	0.204	0.141	0.128			0.114	0.125	0.12	0.116	0.126	0.123	0.116	0.126	0.121	0.126	0.123		0.122	0.12	0.115	0.122	0.125	0.115	0.122	0.121	0.111	0.114	0.118
10839	0.122	0.124	0.118	0.121	0.127	0.128	0.121	0.129	0.127	0.205	0.141	0.128			0.114	0.125	0.12	0.116	0.126	0.123	0.116	0.125	0.121	0.126	0.123		0.122	0.12	0.115	0.122	0.125	0.115	0.123	0.121	0.11	0.114	0.118
10851	0.122	0.124	0.118	0.121	0.128	0.129	0.121	0.129	0.127	0.204	0.14	0.128			0.114	0.125	0.12	0.116	0.126	0.123	0.116	0.125	0.121	0.127	0.123		0.122	0.12	0.115	0.122	0.125	0.115	0.123	0.121	0.11	0.113	0.118
10863	0.122	0.125	0.118	0.121	0.128	0.128	0.121	0.129	0.127	0.203	0.14	0.128			0.114	0.125	0.12	0.116	0.126	0.123	0.116	0.125	0.121	0.126	0.123		0.122	0.12	0.115	0.122	0.125	0.115	0.123	0.121	0.11	0.114	0.119
10875	0.122	0.125	0.118	0.121	0.128	0.128	0.121	0.129	0.127	0.204	0.141	0.128			0.114	0.125	0.12	0.116	0.126	0.123	0.116	0.126	0.12	0.126	0.123		0.123	0.12	0.115	0.123	0.125	0.115	0.123	0.121	0.11	0.113	0.119
10887	0.122	0.124	0.118	0.121	0.128	0.128	0.121	0.129	0.127	0.203	0.14	0.128			0.114	0.125	0.12	0.116	0.126	0.123	0.116	0.126	0.121	0.126	0.123		0.122	0.12	0.115	0.122	0.125	0.115	0.123	0.121	0.11	0.114	0.118
10899	0.122	0.124	0.118	0.121	0.127	0.128	0.121	0.129	0.127	0.203	0.141	0.128			0.114	0.125	0.12	0.116	0.126	0.123	0.116	0.126	0.121	0.126	0.123		0.122	0.12	0.114	0.122	0.125	0.115	0.123	0.121	0.11	0.113	0.119
10911	0.122	0.125	0.118	0.121	0.127	0.128	0.121	0.129	0.127	0.203	0.14	0.128			0.114	0.125	0.12	0.115	0.126	0.123	0.116	0.126	0.121	0.126	0.123		0.123	0.12	0.114	0.122	0.125	0.115	0.122	0.121	0.111	0.114	0.119
10923	0.122	0.124	0.118	0.121	0.127	0.128	0.121	0.129	0.127	0.202	0.139	0.128			0.114	0.125	0.12	0.116	0.126	0.123	0.116	0.126	0.121	0.126	0.123		0.122	0.12	0.114	0.122	0.125	0.115	0.123	0.121	0.11	0.114	0.118
10935	0.122	0.124	0.118	0.121	0.127	0.128	0.12	0.129	0.127	0.202	0.139	0.128			0.114	0.125	0.12	0.116	0.126	0.123	0.116	0.126	0.121	0.127	0.123		0.122	0.119	0.115	0.122	0.125	0.115	0.122	0.121	0.111	0.114	0.119
10947	0.122	0.125	0.118	0.121	0.127	0.128	0.121	0.129	0.127	0.201	0.139	0.128			0.114	0.125	0.12	0.116	0.127	0.123	0.116	0.126	0.121	0.126	0.123		0.122	0.12	0.115	0.122	0.125	0.115	0.122	0.121	0.11	0.114	0.119
10959	0.122	0.124	0.118	0.121	0.127	0.128	0.121	0.129	0.127	0.201	0.14	0.128			0.114	0.125	0.12	0.116	0.126	0.123	0.116	0.126	0.121	0.127	0.123		0.122	0.12	0.114	0.122	0.125	0.115	0.122	0.121	0.11	0.114	0.119
10971	0.122	0.124	0.118	0.121	0.128	0.129	0.121	0.129	0.127	0.2	0.139	0.128			0.114	0.125	0.12	0.116	0.127	0.123	0.116	0.126	0.121	0.126	0.123		0.122	0.12	0.115	0.122	0.125	0.115	0.123	0.121	0.111	0.114	0.119
10983	0.122	0.125	0.118	0.121	0.128	0.129	0.121	0.129	0.127	0.201	0.14	0.128			0.114	0.125	0.12	0.116	0.126	0.123	0.116	0.126	0.121	0.126	0.123		0.122	0.12	0.115	0.122	0.125	0.115	0.122	0.121	0.111	0.114	0.119
10995	0.122	0.124	0.118	0.121	0.128	0.128	0.121	0.129	0.127	0.2	0.139	0.128			0.114	0.125	0.12	0.116	0.126	0.123	0.116	0.126	0.121	0.127	0.123		0.122	0.12	0.115	0.122	0.125	0.115	0.122	0.121	0.11	0.113	0.119
11007	0.122	0.124	0.118	0.121	0.128	0.128	0.121	0.129	0.127	0.2	0.138	0.128			0.114	0.125	0.12	0.116	0.126	0.123	0.116	0.125	0.121	0.126	0.123		0.122	0.12	0.115	0.122	0.125	0.115	0.122	0.121	0.11	0.113	0.118
11019	0.122	0.124	0.118	0.121	0.127	0.128	0.121	0.129	0.127	0.2	0.139	0.128			0.114	0.125	0.12	0.116	0.126	0.123	0.116	0.125	0.121	0.126	0.123		0.122	0.12	0.115	0.122	0.125	0.115	0.122	0.121	0.111	0.114	0.119
11031	0.122	0.124	0.118	0.121	0.127	0.129	0.121	0.129	0.127	0.199	0.138	0.129			0.114	0.125	0.12	0.116	0.126	0.123	0.116	0.126	0.121	0.126	0.123		0.122	0.12	0.115	0.123	0.125	0.115	0.122	0.121	0.11	0.113	0.118
11043	0.122	0.124	0.118	0.121	0.128	0.128	0.121	0.129	0.127	0.2	0.139	0.128			0.114	0.125	0.12	0.116	0.126	0.123	0.116	0.126	0.121	0.126	0.123		0.122	0.119	0.114	0.123	0.125	0.115	0.123	0.121	0.11	0.114	0.119
11055	0.122	0.124	0.118	0.121	0.127	0.128	0.121	0.129	0.127	0.198	0.138	0.128			0.114	0.125	0.12	0.116	0.126	0.123	0.116	0.126	0.121	0.127	0.123		0.122	0.12	0.115	0.123	0.125	0.115	0.122	0.121	0.11	0.113	0.118
11067	0.122	0.124	0.118	0.121	0.127	0.128	0.121	0.129	0.127	0.199	0.139	0.128			0.114	0.125	0.12	0.116	0.126	0.123	0.116	0.126	0.121	0.126	0.123		0.122	0.12	0.114	0.123	0.125	0.115	0.122	0.121	0.111	0.114	0.119
11079	0.122	0.125	0.118	0.12	0.127	0.128	0.12	0.129	0.127	0.198	0.137	0.128			0.114	0.125	0.12	0.116	0.126	0.123	0.116	0.125	0.12	0.127	0.123		0.122	0.12	0.114	0.123	0.125	0.115	0.123	0.121	0.111	0.113	0.118
11091	0.122	0.124	0.118	0.121	0.127	0.128	0.121	0.129	0.127	0.198	0.138	0.128			0.114	0.125	0.12	0.116	0.126	0.123	0.116	0.126	0.121	0.126	0.123		0.122	0.12	0.115	0.123	0.125	0.115	0.122	0.121	0.111	0.113	0.118
11103	0.122	0.124	0.118	0.121	0.128	0.128	0.121	0.129	0.127	0.198	0.137	0.128			0.114	0.125	0.12	0.116	0.127	0.123	0.116	0.125	0.12	0.126	0.123		0.122	0.12	0.115	0.123	0.125	0.115	0.122	0.121	0.111	0.114	0.119
11115	0.122	0.124	0.118	0.121	0.127	0.128	0.121	0.129	0.127	0.197	0.137	0.128			0.114	0.125	0.12	0.116	0.126	0.123	0.116	0.126	0.121	0.126	0.123		0.122	0.12	0.114	0.122	0.125	0.115	0.122	0.121	0.11	0.113	0.118
11127	0.122	0.125	0.118	0.121	0.127	0.128	0.121	0.129	0.127	0.197	0.137	0.128			0.114	0.125	0.12	0.116	0.126	0.123	0.116	0.125	0.12	0.127	0.123		0.122	0.12	0.114	0.122	0.125	0.115	0.122	0.121	0.111	0.114	0.119
11139	0.122	0.124	0.118	0.121	0.127	0.128	0.121	0.129	0.127	0.196	0.137	0.128			0.114	0.125	0.12	0.116	0.126	0.123	0.116	0.125	0.121	0.126	0.123		0.122	0.12	0.114	0.122	0.125	0.115	0.122	0.121	0.111	0.114	0.119
11151	0.122	0.125	0.118	0.121	0.127	0.128	0.121	0.129	0.127	0.196	0.137	0.128			0.114	0.125	0.12	0.116	0.126	0.123	0.116	0.126	0.121	0.126	0.123		0.122	0.12	0.115	0.122	0.125	0.115	0.122	0.121	0.111	0.114	0.119
11163	0.122	0.125	0.118	0.121	0.127	0.128	0.121	0.129	0.127	0.195	0.136	0.128			0.114	0.125	0.12	0.116	0.126	0.123	0.116	0.125	0.121	0.126	0.123		0.122	0.12	0.115	0.122	0.125	0.115	0.122	0.121	0.111	0.114	0.119
11175	0.122	0.124	0.118	0.121	0.127	0.129	0.12	0.129	0.127	0.195	0.137	0.128			0.114	0.125	0.12	0.116	0.126	0.123	0.116	0.125	0.12	0.126	0.123		0.122	0.12	0.115	0.122	0.125	0.115	0.122	0.121	0.11	0.113	0.118
11187	0.122	0.124	0.118	0.121	0.127	0.128	0.121	0.129	0.128	0.194	0.136	0.128			0.114	0.125	0.12	0.116	0.126	0.123	0.116	0.125	0.121	0.126	0.123		0.122	0.12	0.115	0.122	0.125	0.115	0.122	0.121	0.11	0.114	0.119
11199	0.122	0.125	0.118	0.121	0.127	0.128	0.121	0.129	0.128	0.195	0.137	0.128			0.114	0.125	0.12	0.116	0.127	0.123	0.116	0.125	0.121	0.127	0.123		0.122	0.12	0.115	0.122	0.125	0.115	0.122	0.121	0.11	0.114	0.119
11211	0.122	0.124	0.118	0.121	0.127	0.129	0.121	0.129	0.129	0.195	0.136	0.128			0.114	0.125	0.12	0.116	0.126	0.123	0.116	0.126	0.121	0.127	0.123		0.122	0.12	0.115	0.122	0.125	0.115	0.122	0.121	0.11	0.114	0.118
11223	0.122	0.124	0.118	0.122	0.128	0.129	0.121	0.129	0.129	0.193	0.136	0.128			0.114	0.125	0.12	0.116	0.126	0.123	0.116	0.125	0.121	0.127	0.123		0.123	0.12	0.115	0.122	0.125	0.115	0.123	0.121	0.111	0.114	0.118
11235	0.122	0.124	0.118	0.121	0.128	0.129	0.12	0.129	0.129	0.193	0.136	0.128			0.114	0.124	0.12	0.116	0.126	0.123	0.116	0.125	0.121	0.127	0.123		0.123	0.119	0.115	0.123	0.125	0.115	0.122	0.121	0.11	0.113	0.118
11247	0.122	0.124	0.118	0.122	0.128	0.129	0.12	0.129	0.129	0.192	0.136	0.128			0.114	0.125	0.12	0.116	0.127	0.123	0.116	0.125	0.121	0.126	0.123		0.122	0.12	0.115	0.123	0.125	0.115	0.122	0.121	0.111	0.114	0.119
11259	0.122	0.124	0.118	0.121	0.128	0.128	0.121	0.129	0.129	0.193	0.136	0.128			0.114	0.125	0.12	0.116	0.126	0.123	0.116	0.125	0.121	0.126	0.123		0.122	0.12	0.115	0.123	0.125	0.115	0.123	0.121	0.11	0.114	0.119
11271	0.121	0.124	0.118	0.121	0.127	0.129	0.121	0.129	0.128	0.192	0.136	0.128			0.114	0.125	0.12	0.116	0.126	0.123	0.116	0.125	0.121	0.127	0.123		0.122	0.12	0.115	0.123	0.125	0.115	0.122	0.121	0.11	0.113	0.118
11283	0.122	0.125	0.118	0.121	0.128	0.129	0.12	0.129	0.128	0.191	0.135	0.128			0.114	0.125	0.12	0.116	0.127	0.123	0.116	0.125	0.121	0.127	0.123		0.123	0.12	0.115	0.123	0.125	0.115	0.122	0.121	0.11	0.113	0.118
11295	0.122	0.125	0.118	0.121	0.128	0.128	0.121	0.129	0.127	0.191	0.136	0.128			0.114	0.125	0.12	0.116	0.126	0.123	0.116	0.126	0.121	0.126	0.123		0.123	0.12	0.115	0.122	0.125	0.115	0.122	0.121	0.11	0.114	0.119
11307	0.122	0.125	0.118	0.121	0.128	0.128	0.121	0.129	0.127	0.191	0.135	0.128			0.114	0.125	0.12	0.116	0.126	0.123	0.116	0.125	0.121	0.126	0.123		0.122	0.12	0.115	0.122	0.125	0.115	0.122	0.121	0.111	0.114	0.119
11319	0.122	0.124	0.118	0.121	0.128	0.128	0.12	0.129	0.127	0.19	0.134	0.128			0.113	0.125	0.12	0.116	0.126	0.123	0.116	0.125	0.12	0.126	0.123		0.122	0.119	0.115	0.122	0.125	0.115	0.122	0.121	0.11	0.114	0.118
11331	0.122	0.124	0.117	0.121	0.128	0.128	0.121	0.129	0.127	0.191	0.135	0.128			0.114	0.125	0.12	0.116	0.126	0.123	0.116	0.125	0.121	0.126	0.123		0.123	0.119	0.115	0.122	0.125	0.115	0.122	0.121	0.11	0.113	0.119
11343	0.122	0.125	0.118	0.122	0.128	0.128	0.121	0.129	0.127	0.189	0.135	0.128			0.114	0.125	0.12	0.116	0.126	0.123	0.116	0.125	0.121	0.126	0.123		0.123	0.12	0.115	0.122	0.125	0.115	0.123	0.121	0.11	0.114	0.118
11355	0.122	0.124	0.118	0.122	0.128	0.129	0.121	0.129	0.127	0.19	0.135	0.128			0.114	0.124	0.12	0.116	0.126	0.123	0.116	0.125	0.121	0.126	0.123		0.122	0.119	0.115	0.122	0.125	0.115	0.122	0.121	0.11	0.114	0.119
11367	0.122	0.125	0.118	0.121	0.127	0.128	0.121	0.129	0.127	0.19	0.134	0.128			0.114	0.125	0.12	0.116	0.126	0.123	0.116	0.125	0.121	0.126	0.123		0.122	0.12	0.114	0.122	0.125	0.115	0.123	0.121	0.11	0.113	0.118
11379	0.122	0.124	0.118	0.121	0.127	0.129	0.12	0.129	0.127	0.189	0.134	0.128			0.114	0.125	0.12	0.116	0.126	0.123	0.116	0.125	0.12	0.126	0.123		0.122	0.119	0.115	0.122	0.125	0.115	0.122	0.121	0.11	0.114	0.119
11391	0.122	0.125	0.118	0.121	0.127	0.128	0.121	0.128	0.127	0.189	0.135	0.128			0.114	0.125	0.12	0.116	0.126	0.122	0.116	0.125	0.121	0.126	0.123		0.123	0.12	0.114	0.122	0.125	0.115	0.122	0.121	0.11	0.114	0.119
11403	0.122	0.125	0.118	0.121	0.127	0.128	0.12	0.129	0.127	0.188	0.134	0.128			0.114	0.125	0.12	0.116	0.126	0.123	0.116	0.125	0.121	0.126	0.123		0.122	0.12	0.114	0.122	0.125	0.115	0.123	0.121	0.11	0.114	0.119
11415	0.122	0.125	0.118	0.121	0.127	0.128	0.121	0.129	0.128	0.188	0.134	0.128			0.114	0.125	0.12	0.116	0.126	0.122	0.116	0.125	0.121	0.126	0.123		0.122	0.12	0.114	0.122	0.125	0.115	0.122	0.121	0.11	0.114	0.119
11427	0.122	0.124	0.117	0.121	0.127	0.128	0.12	0.129	0.128	0.188	0.134	0.128			0.114	0.125	0.12	0.116	0.126	0.123	0.116	0.125	0.12	0.126	0.123		0.122	0.12	0.115	0.122	0.125	0.115	0.123	0.121	0.111	0.113	0.119
11439	0.122	0.124	0.118	0.121	0.127	0.128	0.12	0.129	0.129	0.188	0.134	0.128			0.114	0.125	0.12	0.116	0.126	0.123	0.116	0.125	0.12	0.126	0.123		0.123	0.119	0.115	0.122	0.125	0.115	0.122	0.121	0.11	0.114	0.119
11451	0.122	0.124	0.118	0.121	0.127	0.128	0.12	0.128	0.127	0.188	0.134	0.128			0.114	0.125	0.12	0.116	0.126	0.123	0.116	0.125	0.121	0.126	0.123		0.123	0.12	0.115	0.122	0.125	0.115	0.122	0.121	0.11	0.113	0.118
11463	0.122	0.124	0.117	0.121	0.127	0.128	0.12	0.127	0.127	0.186	0.134	0.128			0.114	0.125	0.12	0.116	0.126	0.123	0.116	0.124	0.121	0.126	0.123		0.122	0.12	0.115	0.122	0.125	0.115	0.123	0.121	0.11	0.113	0.119
11475	0.122	0.124	0.118	0.121	0.127	0.128	0.12	0.127	0.127	0.187	0.134	0.128			0.114	0.125	0.12	0.116	0.127	0.123	0.116	0.124	0.121	0.126	0.123		0.122	0.12	0.115	0.122	0.125	0.115	0.123	0.121	0.111	0.114	0.119
11487	0.122	0.124	0.118	0.121	0.127	0.128	0.12	0.128	0.127	0.186	0.133	0.128			0.114	0.125	0.12	0.115	0.126	0.123	0.116	0.124	0.121	0.126	0.123		0.122	0.12	0.115	0.122	0.125	0.115	0.122	0.121	0.11	0.114	0.118
11499	0.122	0.125	0.118	0.121	0.128	0.129	0.12	0.128	0.127	0.186	0.134	0.128			0.114	0.125	0.12	0.116	0.126	0.123	0.116	0.124	0.121	0.126	0.123		0.122	0.12	0.115	0.122	0.125	0.115	0.123	0.121	0.111	0.114	0.119
11511	0.122	0.124	0.118	0.121	0.127	0.128	0.12	0.128	0.127	0.185	0.133	0.128			0.114	0.125	0.12	0.116	0.126	0.123	0.116	0.124	0.121	0.126	0.123		0.122	0.12	0.115	0.123	0.125	0.115	0.122	0.121	0.111	0.114	0.119
11523	0.122	0.124	0.117	0.121	0.127	0.128	0.12	0.127	0.127	0.185	0.133	0.128			0.114	0.125	0.12	0.116	0.126	0.123	0.116	0.124	0.121	0.126	0.123		0.122	0.12	0.114	0.122	0.125	0.115	0.122	0.121	0.11	0.114	0.118
11535	0.122	0.124	0.117	0.121	0.127	0.129	0.12	0.127	0.127	0.184	0.133	0.128			0.114	0.125	0.12	0.116	0.127	0.123	0.116	0.124	0.121	0.126	0.123		0.122	0.119	0.115	0.123	0.125	0.115	0.122	0.121	0.111	0.114	0.119
11547	0.122	0.124	0.117	0.121	0.127	0.128	0.12	0.127	0.127	0.184	0.133	0.128			0.114	0.125	0.12	0.116	0.126	0.123	0.116	0.124	0.121	0.126	0.123		0.122	0.119	0.114	0.122	0.125	0.115	0.122	0.121	0.11	0.114	0.119
11559	0.122	0.124	0.118	0.121	0.127	0.128	0.12	0.127	0.127	0.184	0.133	0.128			0.114	0.125	0.12	0.116	0.126	0.123	0.116	0.124	0.121	0.126	0.123		0.123	0.12	0.114	0.122	0.125	0.115	0.122	0.121	0.11	0.114	0.118
11571	0.122	0.124	0.117	0.121	0.127	0.128	0.12	0.128	0.127	0.183	0.133	0.128			0.114	0.125	0.12	0.116	0.126	0.123	0.116	0.124	0.121	0.126	0.123		0.122	0.12	0.114	0.122	0.125	0.115	0.122	0.121	0.11	0.113	0.118
11583	0.122	0.124	0.117	0.121	0.128	0.128	0.12	0.127	0.127	0.184	0.133	0.128			0.114	0.125	0.12	0.116	0.126	0.123	0.116	0.125	0.121	0.127	0.123		0.122	0.12	0.114	0.122	0.125	0.115	0.123	0.121	0.111	0.114	0.119
11595	0.122	0.125	0.118	0.121	0.128	0.128	0.12	0.127	0.127	0.183	0.132	0.128			0.114	0.125	0.12	0.116	0.126	0.123	0.116	0.124	0.121	0.126	0.123		0.122	0.12	0.114	0.122	0.125	0.115	0.123	0.121	0.111	0.114	0.118
11607	0.121	0.124	0.117	0.121	0.128	0.128	0.12	0.128	0.127	0.182	0.132	0.128			0.114	0.125	0.12	0.116	0.126	0.123	0.116	0.124	0.121	0.126	0.123		0.122	0.12	0.115	0.122	0.125	0.115	0.122	0.121	0.111	0.114	0.119
11619	0.122	0.124	0.117	0.121	0.128	0.128	0.12	0.128	0.127	0.183	0.133	0.128			0.114	0.125	0.12	0.116	0.126	0.123	0.116	0.124	0.121	0.127	0.123		0.122	0.119	0.114	0.122	0.125	0.115	0.122	0.121	0.111	0.113	0.118
11631	0.122	0.124	0.118	0.121	0.127	0.128	0.12	0.128	0.127	0.182	0.132	0.128			0.114	0.125	0.12	0.116	0.126	0.123	0.116	0.124	0.121	0.126	0.122		0.122	0.119	0.114	0.122	0.125	0.115	0.122	0.121	0.111	0.113	0.119
11643	0.122	0.124	0.118	0.121	0.127	0.128	0.12	0.128	0.127	0.182	0.132	0.128			0.114	0.125	0.12	0.116	0.126	0.123	0.116	0.124	0.121	0.127	0.123		0.122	0.12	0.115	0.122	0.124	0.115	0.123	0.121	0.11	0.114	0.118
11655	0.122	0.125	0.118	0.121	0.127	0.128	0.12	0.127	0.127	0.182	0.132	0.128			0.114	0.125	0.12	0.116	0.126	0.123	0.116	0.124	0.121	0.127	0.123		0.122	0.12	0.115	0.122	0.125	0.115	0.122	0.121	0.111	0.113	0.119
11667	0.122	0.124	0.117	0.121	0.128	0.128	0.12	0.128	0.127	0.181	0.132	0.128			0.114	0.124	0.12	0.116	0.126	0.123	0.116	0.124	0.121	0.126	0.123		0.122	0.119	0.115	0.122	0.125	0.115	0.122	0.121	0.111	0.113	0.119
11679	0.122	0.124	0.118	0.121	0.128	0.128	0.12	0.128	0.127	0.18	0.132	0.128			0.114	0.125	0.12	0.116	0.126	0.123	0.116	0.124	0.121	0.126	0.123		0.123	0.12	0.115	0.122	0.125	0.115	0.123	0.121	0.11	0.114	0.119
11691	0.122	0.124	0.118	0.121	0.128	0.128	0.12	0.128	0.127	0.18	0.132	0.128			0.114	0.125	0.12	0.116	0.126	0.123	0.116	0.124	0.121	0.127	0.123		0.122	0.12	0.115	0.122	0.125	0.115	0.123	0.121	0.11	0.113	0.118
11703	0.122	0.125	0.118	0.121	0.128	0.129	0.12	0.128	0.127	0.18	0.132	0.128			0.114	0.125	0.12	0.116	0.126	0.123	0.116	0.124	0.121	0.126	0.123		0.122	0.12	0.115	0.122	0.125	0.115	0.122	0.121	0.11	0.113	0.119
11715	0.122	0.124	0.118	0.121	0.128	0.128	0.12	0.128	0.127	0.18	0.131	0.128			0.114	0.125	0.12	0.116	0.126	0.123	0.116	0.124	0.121	0.127	0.123		0.122	0.12	0.115	0.123	0.126	0.115	0.122	0.121	0.111	0.113	0.119
11727	0.122	0.124	0.118	0.121	0.127	0.129	0.12	0.128	0.127	0.178	0.132	0.128			0.114	0.125	0.12	0.116	0.126	0.123	0.116	0.124	0.121	0.126	0.123		0.122	0.12	0.115	0.123	0.125	0.115	0.123	0.121	0.11	0.114	0.119
11739	0.122	0.124	0.118	0.121	0.128	0.129	0.12	0.127	0.127	0.178	0.131	0.128			0.114	0.125	0.12	0.116	0.126	0.123	0.116	0.124	0.121	0.126	0.123		0.122	0.12	0.115	0.122	0.125	0.115	0.123	0.121	0.11	0.113	0.118
11751	0.122	0.124	0.118	0.121	0.127	0.129	0.12	0.127	0.127	0.178	0.131	0.128			0.114	0.125	0.12	0.116	0.126	0.123	0.116	0.124	0.121	0.126	0.123		0.122	0.12	0.115	0.123	0.125	0.115	0.122	0.121	0.111	0.113	0.119
11763	0.122	0.124	0.118	0.121	0.127	0.128	0.12	0.127	0.127	0.178	0.132	0.128			0.114	0.125	0.12	0.116	0.126	0.123	0.116	0.124	0.121	0.127	0.123		0.122	0.12	0.115	0.122	0.125	0.115	0.122	0.121	0.111	0.114	0.119
11775	0.122	0.124	0.118	0.121	0.127	0.128	0.12	0.127	0.127	0.177	0.131	0.128			0.114	0.124	0.12	0.116	0.126	0.123	0.116	0.124	0.121	0.126	0.123		0.122	0.119	0.115	0.122	0.125	0.115	0.122	0.121	0.11	0.114	0.118
11787	0.122	0.124	0.118	0.121	0.127	0.128	0.12	0.128	0.127	0.178	0.131	0.128			0.114	0.125	0.12	0.116	0.126	0.123	0.116	0.124	0.121	0.126	0.123		0.122	0.12	0.114	0.122	0.125	0.115	0.122	0.121	0.111	0.114	0.118
11799	0.122	0.124	0.118	0.121	0.127	0.128	0.12	0.128	0.127	0.176	0.131	0.128			0.114	0.125	0.12	0.115	0.126	0.122	0.116	0.124	0.121	0.126	0.123		0.122	0.12	0.114	0.122	0.125	0.115	0.123	0.121	0.111	0.114	0.119
11811	0.122	0.124	0.117	0.121	0.127	0.128	0.12	0.127	0.127	0.176	0.131	0.128			0.114	0.125	0.12	0.116	0.126	0.123	0.116	0.124	0.121	0.126	0.123		0.122	0.119	0.114	0.122	0.125	0.115	0.122	0.121	0.11	0.113	0.118
11823	0.122	0.124	0.118	0.122	0.127	0.129	0.12	0.127	0.127	0.176	0.132	0.128			0.114	0.125	0.12	0.116	0.126	0.123	0.116	0.124	0.121	0.126	0.123		0.123	0.12	0.114	0.122	0.124	0.115	0.122	0.121	0.111	0.113	0.118
11835	0.122	0.124	0.118	0.121	0.128	0.128	0.12	0.128	0.127	0.175	0.131	0.128			0.114	0.125	0.12	0.116	0.126	0.123	0.116	0.124	0.121	0.126	0.123		0.122	0.119	0.114	0.122	0.125	0.115	0.122	0.121	0.11	0.113	0.118
11847	0.121	0.124	0.117	0.121	0.128	0.128	0.119	0.128	0.126	0.175	0.131	0.128			0.114	0.124	0.12	0.116	0.126	0.123	0.116	0.124	0.121	0.126	0.123		0.122	0.119	0.115	0.122	0.125	0.114	0.122	0.12	0.11	0.114	0.118
11859	0.122	0.124	0.118	0.122	0.127	0.128	0.12	0.128	0.127	0.174	0.131	0.128			0.114	0.125	0.12	0.116	0.126	0.123	0.116	0.124	0.121	0.126	0.123		0.122	0.12	0.115	0.122	0.125	0.115	0.122	0.121	0.11	0.114	0.119
11871	0.122	0.124	0.118	0.122	0.127	0.128	0.12	0.128	0.127	0.174	0.131	0.128			0.114	0.125	0.12	0.116	0.126	0.123	0.116	0.124	0.121	0.126	0.123		0.122	0.119	0.114	0.122	0.125	0.115	0.122	0.121	0.11	0.114	0.118
11883	0.122	0.125	0.117	0.121	0.127	0.128	0.12	0.128	0.127	0.174	0.131	0.128			0.114	0.125	0.12	0.116	0.126	0.123	0.116	0.124	0.121	0.126	0.123		0.122	0.119	0.115	0.122	0.125	0.115	0.123	0.121	0.11	0.114	0.119
11895	0.122	0.124	0.118	0.121	0.128	0.128	0.12	0.127	0.127	0.174	0.131	0.128			0.114	0.125	0.12	0.116	0.126	0.123	0.116	0.124	0.121	0.126	0.123		0.122	0.119	0.115	0.122	0.125	0.115	0.123	0.12	0.11	0.114	0.118
11907	0.122	0.124	0.118	0.121	0.127	0.128	0.12	0.128	0.127	0.174	0.13	0.128			0.114	0.124	0.12	0.116	0.126	0.123	0.116	0.124	0.121	0.126	0.123		0.123	0.119	0.114	0.122	0.125	0.115	0.122	0.121	0.11	0.113	0.118
11919	0.122	0.124	0.118	0.121	0.127	0.129	0.12	0.128	0.127	0.173	0.131	0.128			0.114	0.124	0.12	0.116	0.126	0.122	0.116	0.124	0.121	0.126	0.123		0.123	0.12	0.115	0.122	0.125	0.115	0.122	0.121	0.11	0.113	0.118
11931	0.122	0.124	0.118	0.121	0.127	0.129	0.12	0.128	0.127	0.173	0.131	0.128			0.114	0.125	0.12	0.116	0.126	0.123	0.116	0.124	0.121	0.126	0.123		0.122	0.12	0.115	0.122	0.125	0.115	0.122	0.121	0.111	0.114	0.119
11943	0.122	0.124	0.117	0.121	0.127	0.129	0.12	0.127	0.127	0.172	0.13	0.128			0.114	0.125	0.12	0.116	0.126	0.123	0.116	0.124	0.121	0.126	0.123		0.123	0.12	0.115	0.122	0.125	0.115	0.122	0.121	0.11	0.113	0.118
11955	0.122	0.124	0.118	0.121	0.127	0.129	0.119	0.127	0.126	0.172	0.131	0.128			0.114	0.125	0.12	0.116	0.126	0.123	0.116	0.124	0.121	0.126	0.123		0.122	0.12	0.115	0.122	0.125	0.114	0.122	0.121	0.111	0.113	0.119
11967	0.122	0.124	0.117	0.121	0.127	0.128	0.12	0.127	0.127	0.172	0.13	0.128			0.114	0.125	0.12	0.116	0.126	0.123	0.116	0.124	0.121	0.126	0.123		0.122	0.12	0.114	0.122	0.125	0.115	0.122	0.121	0.11	0.113	0.119
11979	0.122	0.124	0.118	0.121	0.127	0.129	0.12	0.127	0.127	0.172	0.131	0.128			0.114	0.125	0.12	0.116	0.126	0.123	0.116	0.124	0.121	0.126	0.123		0.122	0.119	0.115	0.122	0.125	0.115	0.122	0.121	0.11	0.113	0.118
11991	0.122	0.124	0.117	0.118	0.124	0.117	0.12	0.127	0.127	0.172	0.13	0.128			0.113	0.124	0.119	0.113	0.124	0.119	0.116	0.124	0.121	0.126	0.123		0.122	0.119	0.098	0.103	0.328	0.115	0.122	0.121	0.111	0.113	0.119
12003	0.122	0.124	0.118	0.118	0.124	0.118	0.12	0.128	0.127	0.171	0.13	0.128			0.114	0.125	0.12	0.114	0.125	0.12	0.116	0.124	0.121	0.126	0.123		0.122	0.12	0.099	0.103	0.328	0.115	0.122	0.121	0.11	0.114	0.119
12015	0.122	0.124	0.118	0.118	0.124	0.118	0.12	0.128	0.127	0.171	0.13	0.128			0.114	0.125	0.12	0.114	0.125	0.12	0.116	0.124	0.121	0.126	0.123		0.122	0.12	0.099	0.103	0.328	0.115	0.122	0.121	0.11	0.114	0.119
12027	0.122	0.124	0.118	0.118	0.124	0.118	0.12	0.128	0.127	0.169	0.13	0.128			0.114	0.125	0.12	0.114	0.125	0.12	0.116	0.124	0.121	0.126	0.123		0.122	0.119	0.098	0.103	0.328	0.115	0.122	0.121	0.111	0.114	0.119
12039	0.121	0.124	0.117	0.117	0.124	0.117	0.12	0.127	0.127	0.17	0.13	0.128			0.114	0.124	0.12	0.114	0.124	0.12	0.116	0.124	0.121	0.126	0.123		0.122	0.119	0.098	0.103	0.327	0.115	0.122	0.121	0.11	0.114	0.119
12051	0.122	0.125	0.118	0.118	0.125	0.118	0.12	0.127	0.127	0.169	0.13	0.128			0.114	0.125	0.12	0.114	0.125	0.12	0.116	0.124	0.121	0.126	0.123		0.122	0.12	0.099	0.103	0.327	0.115	0.122	0.121	0.111	0.114	0.119
12063	0.122	0.124	0.118	0.118	0.124	0.118	0.12	0.128	0.127	0.169	0.13	0.128			0.114	0.125	0.12	0.114	0.125	0.12	0.116	0.124	0.121	0.126	0.123		0.122	0.12	0.099	0.103	0.328	0.115	0.122	0.121	0.11	0.114	0.119
12075	0.122	0.124	0.117	0.118	0.124	0.117	0.119	0.127	0.127	0.169	0.13	0.128			0.114	0.124	0.12	0.114	0.124	0.12	0.116	0.124	0.121	0.126	0.123		0.122	0.119	0.098	0.103	0.327	0.115	0.122	0.121	0.11	0.113	0.119
12087	0.122	0.125	0.118	0.118	0.125	0.118	0.12	0.128	0.127	0.168	0.13	0.128			0.114	0.125	0.12	0.114	0.125	0.12	0.116	0.124	0.121	0.126	0.123		0.122	0.12	0.099	0.103	0.327	0.115	0.122	0.121	0.11	0.114	0.119
12099	0.122	0.124	0.118	0.118	0.124	0.118	0.12	0.128	0.127	0.169	0.13	0.128			0.114	0.124	0.12	0.114	0.124	0.12	0.116	0.124	0.121	0.127	0.123		0.122	0.119	0.098	0.103	0.327	0.115	0.122	0.121	0.111	0.114	0.119
12111	0.122	0.124	0.118	0.118	0.124	0.118	0.12	0.127	0.127	0.167	0.13	0.128			0.114	0.125	0.12	0.114	0.125	0.12	0.116	0.124	0.121	0.126	0.123		0.123	0.12	0.098	0.103	0.327	0.115	0.123	0.121	0.111	0.114	0.119
12123	0.122	0.124	0.118	0.118	0.124	0.118	0.12	0.127	0.127	0.168	0.13	0.128			0.114	0.124	0.12	0.114	0.124	0.12	0.116	0.124	0.121	0.126	0.123		0.123	0.119	0.099	0.103	0.327	0.115	0.122	0.121	0.11	0.114	0.119
12135	0.122	0.124	0.118	0.118	0.124	0.118	0.12	0.127	0.127	0.167	0.13	0.128			0.114	0.125	0.12	0.114	0.125	0.12	0.116	0.124	0.121	0.126	0.123		0.123	0.119	0.098	0.103	0.327	0.115	0.122	0.121	0.11	0.114	0.119
12147	0.122	0.124	0.118	0.118	0.124	0.118	0.12	0.127	0.127	0.166	0.13	0.128			0.114	0.124	0.12	0.114	0.124	0.12	0.116	0.124	0.121	0.126	0.123		0.122	0.119	0.099	0.103	0.327	0.115	0.123	0.121	0.11	0.114	0.119
12159	0.122	0.124	0.117	0.117	0.124	0.117	0.12	0.127	0.127	0.167	0.13	0.128			0.113	0.124	0.12	0.113	0.124	0.12	0.116	0.124	0.121	0.126	0.123		0.122	0.119	0.098	0.103	0.327	0.115	0.123	0.121	0.111	0.114	0.119
12171	0.122	0.125	0.118	0.118	0.125	0.118	0.12	0.127	0.127	0.166	0.13	0.128			0.114	0.125	0.12	0.114	0.125	0.12	0.116	0.124	0.121	0.126	0.123		0.122	0.12	0.099	0.103	0.326	0.115	0.122	0.12	0.11	0.114	0.119
12183	0.122	0.125	0.118	0.118	0.125	0.118	0.12	0.128	0.127	0.166	0.13	0.128			0.114	0.124	0.12	0.114	0.124	0.12	0.116	0.124	0.121	0.126	0.123		0.122	0.119	0.099	0.103	0.327	0.115	0.122	0.121	0.11	0.114	0.119
12195	0.122	0.124	0.118	0.118	0.124	0.118	0.12	0.127	0.127	0.166	0.129	0.128			0.113	0.124	0.12	0.113	0.124	0.12	0.116	0.124	0.121	0.126	0.123		0.122	0.119	0.099	0.103	0.325	0.115	0.122	0.121	0.11	0.114	0.119
12207	0.122	0.124	0.118	0.118	0.124	0.118	0.12	0.127	0.127	0.165	0.129	0.128			0.114	0.125	0.12	0.114	0.125	0.12	0.116	0.124	0.121	0.126	0.123		0.122	0.12	0.098	0.103	0.326	0.115	0.122	0.121	0.11	0.113	0.119
12219	0.122	0.124	0.118	0.118	0.124	0.118	0.12	0.127	0.127	0.165	0.13	0.128			0.114	0.125	0.12	0.114	0.125	0.12	0.116	0.124	0.121	0.126	0.123		0.123	0.119	0.099	0.103	0.327	0.115	0.122	0.121	0.11	0.113	0.119
12231	0.121	0.124	0.117	0.117	0.124	0.117	0.12	0.127	0.127	0.164	0.129	0.128			0.113	0.125	0.119	0.113	0.125	0.119	0.116	0.124	0.121	0.126	0.123		0.122	0.119	0.098	0.103	0.325	0.115	0.122	0.121	0.11	0.114	0.119
12243	0.122	0.124	0.117	0.117	0.124	0.117	0.12	0.127	0.127	0.164	0.13	0.128			0.114	0.124	0.12	0.114	0.124	0.12	0.116	0.124	0.121	0.126	0.123		0.122	0.119	0.098	0.103	0.326	0.115	0.122	0.121	0.11	0.114	0.118
12255	0.122	0.124	0.117	0.118	0.124	0.117	0.12	0.127	0.127	0.163	0.129	0.128			0.114	0.125	0.12	0.114	0.125	0.12	0.116	0.124	0.121	0.126	0.123		0.122	0.119	0.099	0.103	0.325	0.115	0.122	0.121	0.11	0.114	0.118
12267	0.122	0.125	0.118	0.118	0.125	0.118	0.12	0.127	0.127	0.164	0.13	0.128			0.114	0.125	0.12	0.114	0.125	0.12	0.117	0.124	0.122	0.126	0.123		0.122	0.119	0.099	0.103	0.326	0.115	0.122	0.121	0.11	0.114	0.119
12279	0.121	0.124	0.117	0.118	0.124	0.117	0.12	0.127	0.127	0.163	0.129	0.128			0.113	0.124	0.12	0.113	0.124	0.12	0.116	0.124	0.121	0.126	0.123		0.122	0.119	0.098	0.103	0.326	0.115	0.123	0.121	0.111	0.114	0.119
12291	0.121	0.124	0.117	0.118	0.124	0.117	0.12	0.127	0.127	0.163	0.129	0.128			0.114	0.125	0.12	0.114	0.125	0.12	0.116	0.124	0.121	0.126	0.123		0.122	0.12	0.098	0.103	0.325	0.115	0.122	0.121	0.111	0.114	0.119
12303	0.121	0.124	0.117	0.118	0.124	0.117	0.12	0.128	0.127	0.162	0.129	0.128			0.113	0.124	0.12	0.113	0.124	0.12	0.116	0.124	0.121	0.126	0.123		0.122	0.119	0.098	0.103	0.325	0.115	0.122	0.121	0.11	0.114	0.119
12315	0.122	0.124	0.117	0.118	0.124	0.117	0.12	0.127	0.127	0.162	0.129	0.128			0.114	0.124	0.12	0.114	0.124	0.12	0.116	0.124	0.121	0.126	0.123		0.122	0.119	0.099	0.103	0.325	0.115	0.122	0.121	0.11	0.113	0.119
12327	0.122	0.125	0.118	0.118	0.125	0.118	0.12	0.127	0.127	0.162	0.129	0.128			0.114	0.125	0.12	0.114	0.125	0.12	0.116	0.124	0.121	0.126	0.123		0.122	0.12	0.099	0.103	0.325	0.115	0.122	0.121	0.11	0.113	0.118
12339	0.122	0.125	0.118	0.118	0.125	0.118	0.12	0.127	0.127	0.162	0.129	0.128			0.114	0.125	0.12	0.114	0.125	0.12	0.116	0.124	0.121	0.126	0.123		0.123	0.12	0.099	0.103	0.326	0.115	0.122	0.121	0.11	0.114	0.118
12351	0.122	0.124	0.117	0.118	0.124	0.117	0.12	0.127	0.127	0.161	0.129	0.128			0.114	0.125	0.12	0.114	0.125	0.12	0.116	0.124	0.121	0.126	0.123		0.122	0.119	0.099	0.103	0.325	0.115	0.122	0.121	0.111	0.114	0.119
12363	0.122	0.124	0.118	0.118	0.124	0.118	0.12	0.128	0.127	0.16	0.129	0.128			0.114	0.125	0.12	0.114	0.125	0.12	0.116	0.124	0.121	0.126	0.123		0.122	0.12	0.099	0.103	0.325	0.115	0.122	0.121	0.11	0.114	0.119
12375	0.122	0.124	0.118	0.118	0.124	0.118	0.12	0.127	0.127	0.16	0.129	0.128			0.114	0.125	0.12	0.114	0.125	0.12	0.116	0.124	0.121	0.126	0.123		0.123	0.12	0.099	0.103	0.326	0.115	0.122	0.121	0.111	0.113	0.119
12387	0.122	0.124	0.117	0.119	0.124	0.117	0.12	0.127	0.127	0.161	0.129	0.128			0.113	0.124	0.119	0.113	0.124	0.119	0.116	0.124	0.121	0.126	0.123		0.122	0.119	0.098	0.103	0.324	0.115	0.122	0.121	0.11	0.114	0.118
12399	0.122	0.124	0.118	0.119	0.124	0.118	0.12	0.127	0.127	0.16	0.129	0.128			0.114	0.125	0.12	0.114	0.125	0.12	0.116	0.124	0.121	0.126	0.123		0.122	0.12	0.099	0.103	0.325	0.115	0.123	0.121	0.111	0.113	0.119
12411	0.122	0.124	0.118	0.119	0.124	0.118	0.12	0.127	0.127	0.16	0.129	0.129			0.114	0.125	0.12	0.114	0.125	0.12	0.116	0.124	0.121	0.126	0.123		0.122	0.12	0.099	0.103	0.325	0.115	0.123	0.121	0.11	0.113	0.118
12423	0.122	0.125	0.118	0.118	0.125	0.118	0.119	0.127	0.126	0.159	0.129	0.128			0.114	0.125	0.12	0.114	0.125	0.12	0.116	0.124	0.121	0.126	0.123		0.122	0.12	0.099	0.103	0.324	0.115	0.122	0.121	0.111	0.113	0.119
12435	0.122	0.124	0.117	0.118	0.124	0.117	0.12	0.127	0.127	0.159	0.128	0.128			0.114	0.124	0.12	0.114	0.124	0.12	0.116	0.124	0.121	0.126	0.123		0.122	0.119	0.098	0.103	0.325	0.115	0.122	0.121	0.111	0.113	0.119
12447	0.122	0.124	0.117	0.118	0.124	0.117	0.12	0.127	0.127	0.159	0.129	0.128			0.114	0.125	0.12	0.114	0.125	0.12	0.116	0.124	0.121	0.126	0.123		0.122	0.12	0.099	0.103	0.324	0.115	0.122	0.121	0.111	0.114	0.119
12459	0.122	0.124	0.118	0.118	0.124	0.118	0.12	0.127	0.127	0.158	0.128	0.128			0.114	0.125	0.12	0.114	0.125	0.12	0.116	0.124	0.121	0.126	0.123		0.122	0.12	0.099	0.103	0.325	0.115	0.123	0.121	0.11	0.113	0.118
12471	0.122	0.124	0.117	0.118	0.124	0.117	0.12	0.127	0.127	0.158	0.128	0.128			0.114	0.124	0.12	0.114	0.124	0.12	0.116	0.124	0.121	0.126	0.123		0.122	0.119	0.098	0.103	0.324	0.115	0.123	0.121	0.11	0.113	0.119
12483	0.122	0.124	0.118	0.118	0.124	0.118	0.12	0.128	0.127	0.157	0.128	0.128			0.114	0.124	0.12	0.114	0.124	0.12	0.116	0.124	0.121	0.126	0.123		0.122	0.119	0.099	0.103	0.324	0.115	0.123	0.121	0.11	0.113	0.119
12495	0.122	0.125	0.118	0.118	0.125	0.118	0.12	0.127	0.127	0.158	0.129	0.128			0.114	0.125	0.12	0.114	0.125	0.12	0.116	0.124	0.121	0.126	0.123		0.122	0.12	0.099	0.103	0.324	0.115	0.123	0.121	0.11	0.114	0.119
12507	0.122	0.124	0.118	0.118	0.124	0.118	0.12	0.127	0.127	0.157	0.129	0.128			0.114	0.125	0.12	0.114	0.125	0.12	0.116	0.124	0.121	0.126	0.123		0.122	0.12	0.099	0.103	0.324	0.115	0.122	0.121	0.11	0.113	0.119
[truncated: 3 more columns]

## Sheet: WT 4D
Experiment 1																															Experiment 2
Time (sec)	X-position (µm)	Y-position (µm)	Force (pN)	Direction	Time (sec)	X-position (µm)	Y-position (µm)	Force (pN)	Direction	Time (sec)	X-position (µm)	Y-position (µm)	Force (pN)	Direction	Time (sec)	X-position (µm)	Y-position (µm)	Force (pN)	Direction	Time (sec)	X-position (µm)	Y-position (µm)	Force (pN)	Direction	Time (sec)	X-position (µm)	Y-position (µm)	Force (pN)	Direction		Time (sec)	X-position (µm)	Y-position (µm)	Force (pN)	Direction	Time (sec)	X-position (µm)	Y-position (µm)	Force (pN)	Direction	Time (sec)	X-position (µm)	Y-position (µm)	Force (pN)	Direction	Time (sec)	X-position (µm)	Y-position (µm)	Force (pN)
Bead1					Bead2					Bead3					Bead4					Bead5					Bead6						Bead1					Bead2					Bead3					Bead4
0	-0.034322	0.056323	0	4	3645.09	-0.122232	0.324973	0	4	4697.47	-0.009749	-0.020541	0	4	5469.7	-0.021888	-0.117636	0	4	6137.12	-0.037665	-0.066987	0	4	6810.39	-0.257037	-0.019008	0	4		962.983	-0.085806	0.059404	0	4	2385.48	0.139077	-0.245051	0	4	3052.06	-0.095447	0.028829	0	4	3739.45	-0.087654	0.072266	0
0.798	0.080705	-0.08398	0	4	3645.9	0.10556	0.293741	0	4	4698.23	-0.054615	-0.199433	0	4	5470.5	0.193539	-0.1445	0	4	6137.88	0.166655	-0.1202	0	4	6811.19	-0.15054	-0.005318	0	4		963.703	0.057798	-0.043485	0	4	2386.28	-0.116456	-0.217645	0	4	3052.82	0.094651	0.125566	0	4	3740.22	-0.095887	0.19425	0
0.886	0.100664	0.050266	0	4	3645.93	-0.088087	0.17195	0	4	4698.31	-0.103842	-0.225875	0	4	5470.58	0.178832	-0.095397	0	4	6137.92	0.209584	-0.096312	0	4	6811.23	-0.220346	0.076737	0	4		963.743	0.069784	-0.059088	0	4	2386.36	-0.085316	-0.20477	0	4	3052.86	0.095129	-0.111036	0	4	3740.29	0.005359	-0.140857	0
0.918	-0.054177	0.152274	0	4	3645.97	-0.187039	0.083524	0	4	4698.35	-0.057046	-0.202129	0	4	5470.62	0.144391	0.129431	0	4	6137.96	0.093963	-0.073545	0	4	6811.27	-0.11233	-0.071741	0	4		963.793	0.029652	-0.084052	0	4	2386.4	-0.049237	-0.241891	0	4	3052.9	-0.119457	0.111838	0	4	3740.33	-0.104445	0.023437	0
0.958	0.015648	0.118623	0	4	3646.02	0.008542	0.176695	0	4	4698.39	0.020684	0.036354	0	4	5470.66	0.104655	0.004954	0	4	6138.02	0.370013	-0.066439	0	4	6811.31	0.019702	-0.050855	0	4		963.823	-0.073301	-0.012885	0	4	2386.44	-0.240112	-0.350675	0	4	3052.94	-0.109523	-0.075139	0	4	3740.37	-0.123835	0.01369	0
0.998	-0.018791	0.087929	0	4	3646.05	-0.070281	0.01819	0	4	4698.43	-0.031265	-0.159233	0	4	5470.7	0.147666	0.066884	0	4	6138.08	-0.049747	0.01876	0	4	6811.35	0.18031	-0.207705	0	4		963.863	-0.021879	0.047982	0	4	2386.48	-0.053691	-0.056341	0	4	3052.98	-0.040087	-0.048269	0	4	3740.41	-0.081008	0.006323	0
1.038	0.050271	0.052405	0	4	3646.09	-0.088792	0.055242	0	4	4698.47	-0.070456	0.054862	0	4	5470.74	0.10454	0.050875	0	4	6138.12	0.280084	-0.154872	0	4	6811.39	-0.074123	0.190791	0	4		963.903	-0.076306	0.00324	0	4	2386.52	-0.058311	-0.174073	0	4	3053.02	-0.046491	-0.002471	0	4	3740.45	-0.141065	0.024535	0
1.078	0.211706	-0.05939	0	4	3646.13	-0.051971	0.123669	0	4	4698.51	-0.045634	-0.21521	0	4	5470.78	0.113697	0.056022	0	4	6138.16	0.076885	-0.050063	0	4	6811.43	-0.294358	-0.041224	0	4		963.943	-0.056641	0.015565	0	4	2386.56	-0.052085	-0.110961	0	4	3053.06	-0.162163	0.213426	0	4	3740.49	-0.075082	-0.046471	0
1.118	-0.005174	-0.017491	0	4	3646.17	-0.14146	0.237066	0	4	4698.55	0.031943	-0.194849	0	4	5470.82	0.078861	0.208774	0	4	6138.2	0.158862	-0.080683	0	4	6811.47	-0.157757	0.002094	0	4		963.983	-0.002125	-0.023244	0	4	2386.6	-0.063523	-0.036376	0	4	3053.1	-0.062829	0.01245	0	4	3740.53	-0.154606	0.065083	0
1.16	0.072997	-0.024606	0	4	3646.21	-0.019052	0.310543	0	4	4698.59	0.020324	-0.004609	0	4	5470.86	0.000797	-0.075452	0	4	6138.24	0.107764	-0.062078	0	4	6811.51	-0.150598	-0.031989	0	4		964.023	-0.132077	0.059784	0	4	2386.64	-0.219919	-0.04201	0	4	3053.14	-0.064562	0.134311	0	4	3740.57	-0.081856	-0.005431	0
1.198	-0.042495	-0.00293	0	4	3646.25	-0.000663	0.508423	0	4	4698.63	-0.137213	-0.153583	0	4	5470.9	-0.009208	-0.126333	0	4	6138.28	0.328334	-0.160419	0	4	6811.55	-0.011451	-0.192427	0	4		964.063	0.05769	0.052936	0	4	2386.68	-0.083136	-0.142796	0	4	3053.18	-0.078153	0.131686	0	4	3740.61	-0.132182	0.072991	0
1.24	0.041853	0.218407	0	4	3646.33	0.015876	0.291744	0	4	4698.71	-0.102896	-0.082989	0	4	5470.94	-0.025418	-0.184532	0	4	6138.32	0.086788	-0.037816	0	4	6811.59	-0.246781	-0.113255	0	4		964.103	-0.023567	0.023881	0	4	2386.72	-0.111887	-0.061768	0	4	3053.22	0.100411	-0.072604	0	4	3740.65	-0.072591	0.075967	0
1.278	0.263071	0.045428	0	4	3646.37	-0.02105	0.413622	0	4	4698.75	0.025527	-0.11484	0	4	5470.98	0.052646	-0.109802	0	4	6138.36	-0.111696	-0.128362	0	4	6811.63	-0.159002	-0.411651	0	4		964.143	-0.113538	-0.003034	0	4	2386.76	-0.081505	-0.187715	0	4	3053.26	0.102947	-0.015639	0	4	3740.69	-0.047982	0.036064	0
1.318	0.077244	0.003799	0	4	3646.41	-0.055791	0.371319	0	4	4698.79	0.093217	0.054434	0	4	5471.02	0.258661	0.289992	0	4	6138.4	0.20592	-0.186974	0	4	6811.67	-0.202431	-0.25013	0	4		964.183	-0.08125	0.167486	0	4	2386.8	-0.060331	0.021366	0	4	3053.3	-0.077905	0.084149	0	4	3740.73	-0.155096	0.069183	0
1.358	0.127147	-0.095627	0	4	3646.45	-0.054118	0.119874	0	4	4698.83	0.079791	-0.007573	0	4	5471.06	0.331507	0.209477	0	4	6138.44	0.198197	-0.098071	0	4	6811.71	0.026138	-0.1332	0	4		964.223	-0.003167	0.197417	0	4	2386.84	-0.013107	-0.223224	0	4	3053.34	0.019174	-0.013004	0	4	3740.77	-0.03604	0.084713	0
1.398	0.183581	-0.050406	0	4	3646.49	-0.069688	0.196209	0	4	4698.87	0.066725	0.012723	0	4	5471.1	0.178514	0.212601	0	4	6138.48	0.07289	-0.199549	0	4	6811.75	0.073145	-0.113435	0	4		964.263	-0.058078	0.009483	0	4	2386.88	-0.041947	-0.234675	0	4	3053.39	-0.172906	0.077884	0	4	3740.81	-0.10194	0.129203	0
1.438	0.078972	-0.118972	0	4	3646.53	-0.142397	0.138705	0	4	4698.91	-0.03295	-0.002809	0	4	5471.14	0.055016	0.068378	0	4	6138.52	0.143544	-0.09637	0	4	6811.79	-0.088763	-0.221739	0	4		964.303	-0.137296	0.013832	0	4	2386.92	-0.1256	-0.25034	0	4	3053.42	0.007615	0.079952	0	4	3740.85	-0.056176	0.152769	0
1.478	0.056155	0.108262	0	4	3646.57	0.050932	0.109212	0	4	4698.95	-0.147915	-0.166977	0	4	5471.18	0.175404	-0.18526	0	4	6138.56	0.121203	-0.026053	0	4	6811.83	0.072881	-0.444948	0	4		964.343	0.081037	-0.059694	0	4	2386.96	-0.056272	-0.127447	0	4	3053.46	-0.083659	0.071635	0	4	3740.89	-0.03395	0.088607	0
1.518	0.189512	-0.191198	0	4	3646.61	-0.136764	0.22001	0	4	4698.99	-0.134333	-0.246478	0	4	5471.22	0.140549	0.123595	0	4	6138.6	0.217969	-0.122055	0	4	6811.87	0.090681	-0.217533	0	4		964.383	-0.034231	0.017987	0	4	2387	-0.039475	-0.171081	0	4	3053.5	0.017976	-0.004171	0	4	3740.93	-0.039622	0.037591	0
1.558	-0.009788	0.116801	0	4	3646.65	-0.048902	0.189718	0	4	4699.03	-0.032201	0.035655	0	4	5471.26	0.379438	0.083601	0	4	6138.64	0.099793	-0.085102	0	4	6811.91	-0.099739	0.02239	0	4		964.423	-0.142403	0.088716	0	4	2387.04	-0.052538	-0.159069	0	4	3053.54	-0.099047	0.061491	0	4	3740.97	-0.099341	0.135932	0
1.6	-0.051735	0.165842	0	4	3646.69	-0.160946	0.069708	0	4	4699.07	-0.062577	-0.154717	0	4	5471.3	0.101399	0.133419	0	4	6138.68	0.182725	-0.08183	0	4	6811.95	0.063558	0.003682	0	4		964.463	-0.039207	0.08985	0	4	2387.08	-0.094619	0.097587	0	4	3053.58	0.036875	-0.029696	0	4	3741.01	0.034027	-0.024761	0
1.638	-0.006821	0.169502	0	4	3646.73	-0.06135	0.05626	0	4	4699.11	-0.066865	-0.323733	0	4	5471.34	-0.051894	-0.25005	0	4	6138.72	0.099895	-0.096705	0	4	6811.99	0.231313	0.062274	0	4		964.503	-0.089773	0.070929	0	4	2387.12	-0.135795	-0.181704	0	4	3053.62	0.031956	-0.028304	0	4	3741.05	-0.147775	0.063466	0
1.678	-0.050452	0.110092	0	4	3646.77	-0.130146	0.197475	0	4	4699.15	0.151091	-0.127782	0	4	5471.38	0.156122	-0.114253	0	4	6138.76	0.0486	-0.167492	0	4	6812.03	0.043642	0.163872	0	4		964.543	-0.006586	0.189016	0	4	2387.16	-0.126167	-0.092801	0	4	3053.66	0.007251	0.050527	0	4	3741.09	-0.125294	0.015706	0
1.718	0.019706	0.080095	0	4	3646.81	-0.019661	0.093603	0	4	4699.19	0.026954	-0.047885	0	4	5471.42	0.126486	0.16699	0	4	6138.81	0.015051	-0.18104	0	4	6812.07	-0.008586	0.017407	0	4		964.585	-0.070988	0.067657	0	4	2387.2	-0.072176	-0.149831	0	4	3053.7	0.116564	0.066719	0	4	3741.13	-0.074273	0.063092	0
1.758	0.030967	0.038926	0	4	3646.85	0.033549	0.045862	0	4	4699.23	-0.11218	-0.15071	0	4	5471.46	0.169147	-0.056254	0	4	6138.84	0.060382	-0.113629	0	4	6812.11	0.141068	-0.153348	0	4		964.623	0.01709	0.083556	0	4	2387.24	-0.084086	-0.083772	0	4	3053.74	-0.064951	0.110823	0	4	3741.17	-0.148004	0.153	0
1.798	0.054618	-0.120984	0	4	3646.89	-0.131682	0.167982	0	4	4699.27	0.233979	-0.378885	0	4	5471.5	0.075088	0.019346	0	4	6138.88	0.200179	-0.127808	0	4	6812.15	0.044439	-0.160586	0	4		964.663	-0.114251	0.105125	0	4	2387.28	-0.23374	0.042561	0	4	3053.78	0.122133	0.081849	0	4	3741.21	-0.086061	0.082632	0
1.838	-0.029412	0.170641	0	4	3646.93	-0.022159	0.09723	0	4	4699.31	-0.018348	-0.192498	0	4	5471.54	0.223953	0.03857	0	4	6138.92	0.115092	-0.022522	0	4	6812.19	-0.067544	-0.270031	0	4		964.703	-0.063026	0.252859	0	4	2387.32	-0.064861	-0.340712	0	4	3053.82	0.016191	0.057707	0	4	3741.25	-0.115041	0.138628	0
1.878	0.236917	0.009361	0	4	3646.97	-0.020438	0.044142	0	4	4699.35	0.207828	-0.138431	0	4	5471.58	0.244159	0.228069	0	4	6138.96	0.325141	-0.090791	0	4	6812.23	-0.042862	-0.257201	0	4		964.743	0.004365	-0.160019	0	4	2387.36	-0.021633	-0.111525	0	4	3053.86	-0.031179	0.013893	0	4	3741.29	-0.027285	-0.067808	0
1.918	0.151255	-0.060755	0	4	3647.01	-0.107694	0.217861	0	4	4699.39	-0.001364	-0.016863	0	4	5471.62	0.003122	0.087525	0	4	6139	0.154274	-0.116714	0	4	6812.27	-0.105585	-0.087492	0	4		964.785	-0.001628	-0.090353	0	4	2387.4	-0.22322	-0.177156	0	4	3053.9	-0.053156	0.058135	0	4	3741.33	-0.082206	0.042055	0
1.958	-0.043434	0.05187	0	4	3647.05	-0.035078	0.368484	0	4	4699.43	-0.089381	-0.16918	0	4	5471.66	0.057189	-0.084149	0	4	6139.04	0.174066	-0.0779	0	4	6812.31	0.072275	0.252517	0	4		964.825	0.238669	-0.18269	0	4	2387.44	0.040463	-0.049612	0	4	3053.94	0.013592	0.116673	0	4	3741.37	-0.091643	0.020857	0
1.998	0.018122	-0.022319	0	4	3647.09	-0.048106	0.352765	0	4	4699.47	-0.104919	-0.188913	0	4	5471.7	0.045707	0.039684	0	4	6139.08	0.086144	0.010875	0	4	6812.35	0.054714	-0.006983	0	4		964.863	0.120085	0.010514	0	4	2387.48	-0.014541	-0.083794	0	4	3053.98	-0.035741	0.099871	0	4	3741.41	-0.094791	0.107779	0
2.038	-0.121433	0.086938	0	4	3647.13	0.026769	0.34449	0	4	4699.51	0.033469	0.049805	0	4	5471.74	0.137286	0.007267	0	4	6139.13	0.167216	-0.191464	0	4	6812.39	-0.219164	-0.046845	0	4		964.903	-0.116567	0.048723	0	4	2387.52	-0.111212	0.045025	0	4	3054.03	-0.022812	-0.11015	0	4	3741.45	-0.108663	0.083572	0
2.078	0.004062	0.00713	0	4	3647.17	-0.052458	0.201427	0	4	4699.55	-0.060117	-0.195352	0	4	5471.78	0.170485	-0.094418	0	4	6139.16	0.017772	-0.20527	0	4	6812.43	-0.220018	-0.13914	0	4		964.943	0.19711	-0.071915	0	4	2387.56	-0.132488	-0.137945	0	4	3054.06	0.065352	0.067566	0	4	3741.49	-0.070144	0.103153	0
2.118	0.135819	0.051372	0	4	3647.21	-0.061612	0.356573	0	4	4699.59	-0.10476	-0.267215	0	4	5471.82	0.041093	0.012124	0	4	6139.2	0.171855	-0.234788	0	4	6812.47	-0.086431	-0.130021	0	4		964.983	-0.04348	-0.143018	0	4	2387.6	-0.085131	-0.031944	0	4	3054.1	-0.12841	0.1158	0	4	3741.53	-0.072992	0.153513	0
2.158	-0.000357	0.080722	0	4	3647.25	-0.146628	0.232672	0	4	4699.63	0.022047	-0.059088	0	4	5471.86	0.067092	-0.008987	0	4	6139.24	0.178705	-0.224204	0	4	6812.51	0.039182	-0.356412	0	4		965.023	-0.058715	0.019617	0	4	2387.64	-0.098888	-0.140773	0	4	3054.15	-0.001517	0.006246	0	4	3741.57	-0.073349	0.08011	0
2.198	0.003371	-0.078296	0	4	3647.29	-0.013811	0.141256	0	4	4699.67	0.013525	0.029857	0	4	5471.9	0.071482	-0.028372	0	4	6139.28	0.268774	-0.120258	0	4	6812.55	0.116618	-0.156334	0	4		965.063	0.027789	-0.080709	0	4	2387.68	0.008112	-0.176495	0	4	3054.18	-0.031701	0.046636	0	4	3741.61	-0.162876	-0.059939	0
2.238	0.143803	-0.001654	0	4	3647.33	-0.137484	0.069963	0	4	4699.71	-0.113378	-0.324052	0	4	5471.94	-0.064046	0.162744	0	4	6139.32	0.140479	-0.180222	0	4	6812.59	0.160812	-0.29628	0	4		965.103	-0.016682	-0.052678	0	4	2387.72	-0.072514	-0.288645	0	4	3054.22	0.051563	0.016222	0	4	3741.65	-0.045841	0.049824	0
2.278	0.036843	0.060934	0	4	3647.37	0.004378	0.020409	0	4	4699.75	0.142581	-0.074862	0	4	5471.98	0.099372	0.166268	0	4	6139.37	-0.057221	-0.131512	0	4	6812.63	-0.014318	-0.212897	0	4		965.143	-0.031943	-0.04219	0	4	2387.76	-0.073145	-0.056637	0	4	3054.26	0.012757	0.030974	0	4	3741.69	-0.059534	0.109045	0
2.318	0.19052	-0.013785	0	4	3647.41	-0.112916	0.071155	0	4	4699.79	-0.047048	0.014212	0	4	5472.02	-0.026234	-0.04009	0	4	6139.4	0.161634	-0.296782	0	4	6812.67	-0.180027	-0.124181	0	4		965.183	-0.124609	0.080026	0	4	2387.8	-0.057878	-0.19721	0	4	3054.3	0.064345	-0.026555	0	4	3741.73	-0.084532	0.151235	0
2.358	-0.097655	-0.070904	0	4	3647.45	-0.152069	0.059965	0	4	4699.83	0.114528	0.034031	0	4	5472.06	-0.02199	-0.178844	0	4	6139.44	0.209565	-0.155452	0	4	6812.71	-0.211428	-0.079481	0	4		965.223	0.056332	0.131467	0	4	2387.84	-0.07563	-0.039552	0	4	3054.34	-0.078689	-0.031851	0	4	3741.77	-0.094339	0.048156	0
2.398	0.221509	0.013021	0	4	3647.49	0.090729	0.214891	0	4	4699.87	-0.101593	-0.149564	0	4	5472.1	0.130366	-0.18374	0	4	6139.48	0.273464	-0.034266	0	4	6812.75	0.099436	0.031116	0	4		965.263	0.021812	-0.084291	0	4	2387.88	-0.12056	-0.14987	0	4	3054.38	-0.224501	0.147589	0	4	3741.81	-0.113327	0.091989	0
2.438	0.101362	-0.044986	0	4	3647.53	-0.078778	0.276109	0	4	4699.91	-0.066346	-0.155674	0	4	5472.14	0.166846	0.090945	0	4	6139.52	0.184121	-0.019791	0	4	6812.79	0.188859	0.05063	0	4		965.303	0.028152	0.030227	0	4	2387.92	-0.111906	-0.163228	0	4	3054.42	0.003097	-0.059968	0	4	3741.85	-0.072253	0.062426	0
2.478	-0.013055	-0.063832	0	4	3647.57	-0.031641	0.318985	0	4	4699.95	-0.04146	-0.15119	0	4	5472.18	0.166438	-0.029106	0	4	6139.56	-0.079383	-0.024004	0	4	6812.83	0.013499	-0.09617	0	4		965.343	-0.034113	-0.01121	0	4	2387.96	-0.078561	-0.134453	0	4	3054.46	-0.081677	0.13044	0	4	3741.89	-0.03604	-0.124964	0
2.518	0.21847	0.083255	0	4	3647.61	-0.085997	0.421327	0	4	4699.99	-0.093628	-0.168378	0	4	5472.22	-0.023857	-0.120734	0	4	6139.6	-0.035327	-0.117919	0	4	6812.87	-0.062488	0.035957	0	4		965.383	-0.127792	0.075336	0	4	2388	-0.121981	-0.182677	0	4	3054.5	-0.042667	0.030572	0	4	3741.93	-0.104164	0.003382	0
2.558	0.079334	-0.076473	0	4	3647.65	-0.027304	0.280116	0	4	4700.03	-0.03353	-0.147756	0	4	5472.26	0.055577	-0.025189	0	4	6139.64	0.166018	-0.139552	0	4	6812.91	-0.154296	-0.213848	0	4		965.423	0.126823	0.140699	0	4	2388.04	-0.087527	-0.412598	0	4	3054.54	-0.042572	0.075484	0	4	3741.97	-0.144461	-0.063695	0
2.598	0.029554	0.137803	0	4	3647.69	-0.17411	0.144014	0	4	4700.07	-0.023545	0.01561	0	4	5472.3	-0.011553	0.147347	0	4	6139.68	0.21414	-0.051654	0	4	6812.95	0.094845	-0.104033	0	4		965.463	0.122258	-0.114621	0	4	2388.08	-0.311996	-0.352111	0	4	3054.58	-0.032275	-0.025763	0	4	3742.01	-0.090483	-0.145006	0
2.638	0.109619	-0.124411	0	4	3647.73	0.085988	0.190279	0	4	4700.11	-0.085026	-0.138989	0	4	5472.34	0.048192	0.083646	0	4	6139.72	-0.007755	-0.023959	0	4	6812.99	0.182152	-0.10631	0	4		965.503	-0.068653	0.035181	0	4	2388.12	-0.317208	-0.087025	0	4	3054.62	0.040444	-0.020654	0	4	3742.05	-0.18876	0.005524	0
2.678	0.024168	0.103181	0	4	3647.77	-0.132147	0.284084	0	4	4700.15	-0.086918	-0.051931	0	4	5472.38	0.033848	-0.176537	0	4	6139.76	0.358779	-0.195555	0	4	6813.03	-0.004196	-0.133232	0	4		965.543	0.070424	-0.089844	0	4	2388.16	-0.034588	-0.354286	0	4	3054.66	-0.046599	0.060084	0	4	3742.09	-0.021206	0.050881	0
2.718	0.078713	-0.075593	0	4	3647.81	-0.03554	0.134473	0	4	4700.19	-0.092233	-0.163005	0	4	5472.42	0.1315	0.192656	0	4	6139.8	0.171651	-0.007235	0	4	6813.07	0.005662	-0.091986	0	4		965.583	0.167334	-0.047705	0	4	2388.2	-0.078784	-0.123872	0	4	3054.7	0.039105	-0.02727	0	4	3742.13	-0.277612	0.147872	0
2.758	0.047325	-0.146437	0	4	3647.85	-0.043537	0.289799	0	4	4700.23	-0.086794	-0.143224	0	4	5472.46	0.038774	-0.093761	0	4	6139.84	0.055259	0.056718	0	4	6813.11	-0.160745	-0.096582	0	4		965.623	-0.031618	-0.050378	0	4	2388.24	-0.169695	-0.018315	0	4	3054.74	-0.133342	0.09676	0	4	3742.17	0.007831	-0.129792	0
2.798	-0.004261	0.028829	0	4	3647.89	-0.113703	0.223244	0	4	4700.27	-0.074107	-0.175333	0	4	5472.5	0.049556	-0.110118	0	4	6139.88	-0.092134	-0.236102	0	4	6813.15	-0.000914	-0.336363	0	4		965.663	-0.129732	0.087363	0	4	2388.28	-0.07809	-0.058135	0	4	3054.78	0.074196	-0.032791	0	4	3742.21	-0.197719	0.018306	0
2.838	0.124846	0.122817	0	4	3647.93	0.045863	0.311673	0	4	4700.31	0.032995	-0.120235	0	4	5472.54	0.010412	-0.205714	0	4	6139.92	0.097416	-0.036141	0	4	6813.19	-0.041473	-0.10028	0	4		965.703	0.041839	-0.118898	0	4	2388.32	-0.186001	-0.132421	0	4	3054.82	-0.137229	0.092398	0	4	3742.25	-0.171447	0.057887	0
2.88	0.151515	-0.000728	0	4	3647.97	-0.046975	0.21138	0	4	4700.35	-0.03864	-0.147512	0	4	5472.58	0.011852	0.022889	0	4	6139.96	0.105235	-0.044432	0	4	6813.23	-0.049785	-0.213065	0	4		965.743	-0.00699	0.024906	0	4	2388.36	-0.11139	-0.080325	0	4	3054.86	-0.052162	0.04536	0	4	3742.29	-0.037468	-0.091303	0
2.918	0.106476	-0.014643	0	4	3648.01	-0.141078	0.226887	0	4	4700.39	-0.00974	-0.004896	0	4	5472.62	0.003313	-0.192295	0	4	6140	0.228834	-0.084194	0	4	6813.27	-0.188782	-0.280551	0	4		965.783	-0.087766	0.024874	0	4	2388.4	-0.097129	-0.165631	0	4	3054.9	-0.00102	-0.007718	0	4	3742.33	-0.097926	0.063546	0
2.958	0.047294	-0.175123	0	4	3648.05	0.10786	-0.009354	0	4	4700.43	-0.081199	-0.239543	0	4	5472.66	-0.135897	-0.366951	0	4	6140.05	0.277064	-0.027624	0	4	6813.31	-0.178682	-0.375519	0	4		965.823	0.030398	-0.068604	0	4	2388.44	-0.146596	-0.176737	0	4	3054.94	-0.196298	0.031986	0	4	3742.37	-0.058419	0.127154	0
2.998	0.001684	0.172509	0	4	3648.09	-0.100194	0.142854	0	4	4700.47	0.039061	-0.316141	0	4	5472.7	-0.011412	-0.128858	0	4	6140.08	0.239074	-0.037591	0	4	6813.35	0.066824	-0.32018	0	4		965.863	-0.069045	0.004233	0	4	2388.48	-0.130653	-0.078331	0	4	3054.98	-0.002587	0.167341	0	4	3742.41	-0.077727	0.141118	0
3.038	0.047042	0.004295	0	4	3648.13	-0.06115	0.057452	0	4	4700.51	0.204875	-0.075281	0	4	5472.74	-0.009628	-0.083459	0	4	6140.12	0.09899	-0.149467	0	4	6813.39	0.113031	-0.081324	0	4		965.903	-0.041951	0.015668	0	4	2388.52	-0.131182	-0.128961	0	4	3055.02	-0.024029	0.042664	0	4	3742.45	-0.020773	0.166671	0
3.078	0.149251	-0.025827	0	4	3648.17	-0.112814	0.139684	0	4	4700.55	0.026817	0.054985	0	4	5472.78	-0.046185	-0.036154	0	4	6140.16	0.312627	-0.135996	0	4	6813.43	0.211384	0.008945	0	4		965.943	-0.015739	-0.062483	0	4	2388.56	-0.093421	-0.10154	0	4	3055.06	0.051716	0.086033	0	4	3742.49	0.001408	0.083862	0
3.118	0.208556	-0.070802	0	4	3648.21	-0.190178	0.217903	0	4	4700.59	0.011642	-0.028304	0	4	5472.82	0.022646	-0.122931	0	4	6140.21	0.183286	-0.072559	0	4	6813.47	0.120085	-0.169512	0	4		965.984	-0.190321	0.018631	0	4	2388.6	-0.103132	-0.306333	0	4	3055.1	-0.105859	0.084142	0	4	3742.53	0.00288	0.134144	0
3.158	0.073143	-0.078091	0	4	3648.25	0.078351	0.251516	0	4	4700.63	0.000602	0.066397	0	4	5472.86	-0.058527	-0.104023	0	4	6140.24	0.132316	-0.140899	0	4	6813.51	0.06344	-0.334756	0	4		966.023	0.032396	-0.04009	0	4	2388.64	-0.123414	-0.306993	0	4	3055.14	-0.217651	0.045415	0	4	3742.57	-0.136477	0.010395	0
3.198	0.065435	-0.035283	0	4	3648.29	-0.032306	0.333944	0	4	4700.67	0.011728	-0.095439	0	4	5472.9	-0.034084	-0.247383	0	4	6140.28	0.05898	-0.173277	0	4	6813.55	-0.007471	-0.305405	0	4		966.063	-0.11838	0.057729	0	4	2388.68	-0.176462	0.004371	0	4	3055.18	-0.201185	0.092314	0	4	3742.61	-0.002581	-0.025334	0
3.238	0.081596	0.021135	0	4	3648.33	-0.054147	0.358148	0	4	4700.71	-0.027731	-0.129744	0	4	5472.94	0.106955	-0.181556	0	4	6140.33	0.023742	-0.107373	0	4	6813.59	-0.199041	-0.361543	0	4		966.103	0.020802	-0.056383	0	4	2388.72	-0.177653	-0.18805	0	4	3055.22	0.068296	-0.033268	0	4	3742.65	-0.310906	-0.008111	0
3.278	0.007849	-0.169446	0	4	3648.37	-0.09834	0.399617	0	4	4700.75	-0.066964	-0.129415	0	4	5472.98	0.209393	-0.025312	0	4	6140.36	0.11255	-0.112263	0	4	6813.63	0.074321	-0.311612	0	4		966.143	-0.127836	0.076128	0	4	2388.76	-0.146207	-0.044915	0	4	3055.26	0.005079	0.048149	0	4	3742.69	-0.034384	-0.022693	0
3.318	0.148813	-0.171628	0	4	3648.41	0.015048	0.345846	0	4	4700.79	0.252927	-0.30307	0	4	5473.02	0.058202	0.078389	0	4	6140.4	-0.053207	-0.173393	0	4	6813.67	-0.173145	-0.20047	0	4		966.183	0.00655	-0.071097	0	4	2388.8	-0.068882	-0.084828	0	4	3055.3	0.052818	0.001743	0	4	3742.73	-0.154918	-0.05607	0
3.358	0.028552	-0.08147	0	4	3648.45	-0.058935	0.415287	0	4	4700.83	-0.050018	-0.214083	0	4	5473.06	-0.042725	-0.1776	0	4	6140.44	0.091356	-0.323131	0	4	6813.71	0.07728	0.254704	0	4		966.223	-0.014649	0.012273	0	4	2388.84	-0.156422	-0.133835	0	4	3055.34	0.011228	0.173387	0	4	3742.77	-0.072903	0.076321	0
3.398	0.02069	-0.175128	0	4	3648.49	0.00923	0.317829	0	4	4700.87	-0.060289	-0.366542	0	4	5473.1	0.042151	0.069892	0	4	6140.48	0.053615	-0.143276	0	4	6813.75	-0.121404	-0.083517	0	4		966.263	-0.061739	-0.041707	0	4	2388.88	-0.113977	-0.09665	0	4	3055.38	0.08817	-0.09789	0	4	3742.81	-0.071871	0.042535	0
3.438	0.238183	-0.056998	0	4	3648.53	-0.06964	0.128807	0	4	4700.91	-0.023596	0.025305	0	4	5473.14	-0.035811	-0.300989	0	4	6140.52	0.016077	-0.128278	0	4	6813.79	-0.049963	-0.25876	0	4		966.303	-0.185679	-0.018721	0	4	2388.92	-0.102629	-0.174579	0	4	3055.42	-0.048568	0.017188	0	4	3742.85	-0.007283	0.09339	0
3.478	0.18201	-0.00483	0	4	3648.57	-0.118457	0.192311	0	4	4700.95	-0.058464	-0.120744	0	4	5473.18	0.10043	-0.060035	0	4	6140.56	0.176271	-0.211918	0	4	6813.83	0.132533	-0.257562	0	4		966.343	0.014022	-0.059694	0	4	2388.96	-0.065116	-0.031921	0	4	3055.46	-0.177335	0.041685	0	4	3742.89	-0.112779	0.030369	0
3.518	-0.022071	0.009494	0	4	3648.61	-0.123762	0.30276	0	4	4700.99	-0.003769	0.029931	0	4	5473.22	-0.04435	0.055358	0	4	6140.6	0.135419	-0.116972	0	4	6813.87	0.04448	-0.03512	0	4		966.383	-0.099025	0.100751	0	4	2389	-0.082021	-0.275941	0	4	3055.51	-0.110689	-0.035449	0	4	3742.93	-0.19171	0.101308	0
3.558	0.120045	0.112332	0	4	3648.65	0.024982	0.275352	0	4	4701.03	0.093402	-0.071718	0	4	5473.26	0.005607	-0.016415	0	4	6140.64	0.217396	-0.166919	0	4	6813.91	0.191047	-0.063614	0	4		966.423	0.154736	0.251931	0	4	2389.04	-0.119145	-0.130066	0	4	3055.55	0.007576	0.045985	0	4	3742.97	-0.127199	0.030317	0
3.598	-0.113831	0.072422	0	4	3648.69	-0.110648	0.245734	0	4	4701.07	0.124204	0.079037	0	4	5473.3	-0.019887	-0.075961	0	4	6140.69	0.195877	-0.009129	0	4	6813.95	-0.296464	-0.131873	0	4		966.463	0.106614	-0.111039	0	4	2389.08	-0.100698	-0.299175	0	4	3055.59	0.010934	0.010224	0	4	3743.01	-0.028821	0.081517	0
3.638	0.027612	0.008879	0	4	3648.73	-0.0899	0.378331	0	4	4701.11	-0.018014	0.036528	0	4	5473.34	0.229172	-0.077449	0	4	6140.72	0.09135	-0.153345	0	4	6813.99	-0.064176	-0.145257	0	4		966.503	-0.064613	0.048304	0	4	2389.12	0.008641	0.064429	0	4	3055.62	-0.041629	0.092717	0	4	3743.05	-0.029522	0.089274	0
3.678	-0.124252	-0.077529	0	4	3648.77	-0.103893	0.278908	0	4	4701.15	-0.063918	-0.279955	0	4	5473.38	0.063759	-0.009328	0	4	6140.76	0.088871	-0.07944	0	4	6814.03	-0.041243	0.125241	0	4		966.543	-0.095164	0.0798	0	4	2389.16	-0.146277	-0.170736	0	4	3055.66	-0.015446	-0.128897	0	4	3743.09	-0.05155	0.102709	0
3.718	-0.037876	0.082161	0	4	3648.81	-0.051216	0.376028	0	4	4701.19	0.008344	0.062345	0	4	5473.42	0.023717	-0.117565	0	4	6140.8	0.207666	-0.159266	0	4	6814.07	-0.192685	0.129821	0	4		966.583	-0.03541	0.224725	0	4	2389.2	-0.044222	-0.182252	0	4	3055.7	-0.018415	0.063546	0	4	3743.13	-0.111498	0.06834	0
3.758	-0.099538	0.020356	0	4	3648.85	-0.021569	0.34105	0	4	4701.23	-0.007879	0.039423	0	4	5473.46	0.031255	-0.11263	0	4	6140.84	0.097129	-0.137916	0	4	6814.11	-0.076554	0.211293	0	4		966.623	-0.000768	-0.007067	0	4	2389.24	-0.089604	-0.320551	0	4	3055.74	0.024348	0.113075	0	4	3743.17	-0.032536	-0.086313	0
3.798	0.082883	-0.022537	0	4	3648.89	-0.080639	0.277359	0	4	4701.27	-0.07282	-0.09944	0	4	5473.5	0.112034	-0.007396	0	4	6140.88	-0.035123	-0.23426	0	4	6814.16	0.028467	-0.027631	0	4		966.663	-0.005748	-0.022219	0	4	2389.28	-0.035327	-0.007215	0	4	3055.78	0.087794	-0.081907	0	4	3743.21	-0.136796	-0.031538	0
3.838	-0.016252	-0.137919	0	4	3648.93	-0.101431	0.318602	0	4	4701.31	-0.081381	-0.163646	0	4	5473.54	0.093963	0.299552	0	4	6140.92	0.102686	-0.179037	0	4	6814.23	0.035228	0.017291	0	4		966.703	0.013595	-0.044104	0	4	2389.32	-0.147201	-0.041833	0	4	3055.82	0.066645	0.227947	0	4	3743.25	-0.071743	-0.146098	0
3.878	0.035666	-0.074139	0	4	3648.97	-0.114194	0.251306	0	4	4701.35	-0.042247	-0.229022	0	4	5473.58	0.146589	-0.175416	0	4	6140.96	-0.01767	-0.104854	0	4	6814.27	0.011639	-0.11329	0	4		966.743	0.049572	-0.040457	0	4	2389.36	-0.151139	-0.028269	0	4	3055.86	-0.090114	0.013439	0	4	3743.29	-0.106567	0.027254	0
3.918	-0.039207	-0.126553	0	4	3649.01	-0.0992	0.16459	0	4	4701.39	0.012547	-0.10632	0	4	5473.62	0.021468	-0.037977	0	4	6141	0.076599	-0.061491	0	4	6814.31	-0.10418	-0.1913	0	4		966.783	0.165081	-0.101859	0	4	2389.4	-0.104457	0.033142	0	4	3055.9	-0.022882	0.036373	0	4	3743.33	-0.08378	0.013712	0
3.958	-0.159775	0.121607	0	4	3649.05	-0.100551	0.022036	0	4	4701.43	-0.060719	-0.178931	0	4	5473.66	0.0326	0.013342	0	4	6141.04	0.067684	-0.055829	0	4	6814.35	0.075155	0.007463	0	4		966.825	0.030908	-0.167061	0	4	2389.44	-0.170319	-0.183163	0	4	3055.94	0.015803	0.095281	0	4	3743.37	-0.127556	0.139053	0
3.998	-0.094515	0.220005	0	4	3649.09	-0.098773	0.136872	0	4	4701.47	0.002619	-0.012707	0	4	5473.7	-0.017198	-0.150723	0	4	6141.08	0.133724	-0.218869	0	4	6814.39	0.005684	-0.093555	0	4		966.863	0.003036	0.002667	0	4	2389.48	-0.167866	-0.248285	0	4	3055.99	0.012859	0.051976	0	4	3743.41	-0.139459	0.057694	0
4.039	-0.065115	0.018971	0	4	3649.13	-0.1124	0.166429	0	4	4701.51	-0.094444	-0.173091	0	4	5473.74	0.071718	-0.04976	0	4	6141.12	0.200306	-0.150066	0	4	6814.44	-0.003141	0.106404	0	4		966.903	0.076372	-0.008761	0	4	2389.52	-0.188237	-0.186887	0	4	3056.02	-0.072603	-0.005357	0	4	3743.45	-0.048001	0.083485	0
4.08	0.103169	0.034154	0	4	3649.17	-0.063702	0.20631	0	4	4701.55	0.046487	0.016412	0	4	5473.78	0.193125	-0.129567	0	4	6141.16	0.003231	-0.102992	0	4	6814.48	-0.13173	-0.093941	0	4		966.943	-0.144063	0.014018	0	4	2389.56	-0.150916	-0.0558	0	4	3056.06	0.149106	0.045898	0	4	3743.49	-0.046204	0.020148	0
4.12	0.057331	-0.061947	0	4	3649.21	-0.094202	0.203308	0	4	4701.59	-0.094549	-0.16832	0	4	5473.82	-0.020104	-0.168491	0	4	6141.2	0.207965	-0.23341	0	4	6814.52	-0.039937	-0.197017	0	4		966.983	-0.000341	0.081379	0	4	2389.6	-0.064931	-0.071032	0	4	3056.1	0.121808	-0.096866	0	4	3743.53	-0.089209	0.187563	0
4.16	0.036251	0.150327	0	4	3649.25	-0.054226	0.447293	0	4	4701.63	0.014242	0.056495	0	4	5473.86	-0.038366	-0.156328	0	4	6141.24	0.224074	-0.11924	0	4	6814.55	-0.18992	-0.2156	0	4		967.023	-0.10302	0.077771	0	4	2389.64	-0.142518	-0.3867	0	4	3056.14	0.004582	0.014118	0	4	3743.57	-0.177156	0.115136	0
4.198	-0.032032	-0.087642	0	4	3649.29	0.027594	0.319559	0	4	4701.67	-0.074741	-0.13282	0	4	5473.9	-0.043107	-0.150459	0	4	6141.28	-0.101348	-0.051429	0	4	6814.59	-0.182254	-0.101098	0	4		967.063	-0.117769	0.020654	0	4	2389.68	-0.123229	-0.331812	0	4	3056.18	-0.075617	0.048536	0	4	3743.61	-0.078975	0.058228	0
4.238	0.036322	0.061574	0	4	3649.33	-0.108803	0.247415	0	4	4701.71	-0.085242	-0.118186	0	4	5473.94	-0.013426	-0.011918	0	4	6141.32	0.0672	-0.161482	0	4	6814.63	0.06122	-0.122329	0	4		967.103	-0.012422	0.032643	0	4	2389.72	-0.164259	-0.335535	0	4	3056.22	-0.023481	0.002129	0	4	3743.65	-0.105101	0.019346	0
4.278	0.080234	-0.088507	0	4	3649.37	-0.088585	0.143266	0	4	4701.75	-0.026256	-0.155033	0	4	5473.98	0.012502	-0.214115	0	4	6141.36	0.11297	-0.154408	0	4	6814.67	0.204336	-0.219014	0	4		967.143	-0.123749	0.020499	0	4	2389.76	0.061414	-0.250018	0	4	3056.26	-0.011559	0.052556	0	4	3743.69	-0.087412	0.102905	0
4.318	0.05858	-0.034595	0	4	3649.41	-0.104862	0.080048	0	4	4701.79	0.053054	-0.263833	0	4	5474.02	0.009303	-0.243756	0	4	6141.4	0.018626	0.043794	0	4	6814.71	-0.178284	0.011068	0	4		967.183	-0.089818	0.055371	0	4	2389.8	0.034766	-0.321382	0	4	3056.3	-0.143034	0.198273	0	4	3743.73	-0.107637	0.173384	0
4.358	0.100663	-0.080106	0	4	3649.45	-0.186839	0.190069	0	4	4701.83	-0.018788	-0.053745	0	4	5474.06	-0.038385	-0.253503	0	4	6141.44	0.171096	-0.173748	0	4	6814.75	0.120139	-0.166481	0	4		967.223	-0.082958	0.057497	0	4	2389.84	-0.187613	0.054663	0	4	3056.34	0.069532	-0.020538	0	4	3743.77	-0.139408	0.165511	0
4.398	-0.004997	-0.198157	0	4	3649.49	-0.130592	0.182825	0	4	4701.87	0.084627	0.10842	0	4	5474.1	0.0251	-0.263308	0	4	6141.48	0.059012	-0.081946	0	4	6814.79	0.012183	-0.078103	0	4		967.263	0.009587	0.0467	0	4	2389.88	-0.123268	-0.18986	0	4	3056.38	-0.035333	0.079765	0	4	3743.81	-0.08522	0.053709	0
4.438	0.156355	-0.171424	0	4	3649.53	0.014971	0.157568	0	4	4701.91	0.001851	0.018686	0	4	5474.14	0.011967	-0.272398	0	4	6141.52	0.085156	-0.177613	0	4	6814.83	-0.199726	-0.27341	0	4		967.303	-0.134298	0.058683	0	4	2389.92	-0.105604	-0.217732	0	4	3056.42	0.132074	0.184935	0	4	3743.85	-0.107318	0.046478	0
4.478	0.083393	-0.126263	0	4	3649.57	-0.149221	0.038824	0	4	4701.95	-0.051423	-0.156421	0	4	5474.18	0.130169	-0.142864	0	4	6141.56	0.26511	-0.272327	0	4	6814.87	-0.03128	-0.140106	0	4		967.343	-0.058543	-0.009863	0	4	2389.96	-0.067703	-0.005891	0	4	3056.46	-0.071087	-0.035329	0	4	3743.89	-0.040208	0.093503	0
4.518	-0.014332	0.05551	0	4	3649.61	-0.074537	0.173976	0	4	4701.99	-0.059923	0.126526	0	4	5474.22	0.043381	-0.111135	0	4	6141.6	0.231625	-0.207692	0	4	6814.91	-0.112856	-0.451184	0	4		967.383	-0.098318	0.055423	0	4	2390	-0.083735	-0.20268	0	4	3056.5	0.026431	-0.001807	0	4	3743.93	-0.092191	0.165469	0
4.558	0.216662	0.00052	0	4	3649.65	-0.200641	0.098515	0	4	4702.03	-0.067372	-0.342838	0	4	5474.26	-0.00302	-0.138625	0	4	6141.64	0.049658	-0.194002	0	4	6814.95	0.046296	-0.157632	0	4		967.423	-0.06216	0.04011	0	4	2390.04	-0.146813	-0.166078	0	4	3056.54	-0.010699	0.031519	0	4	3743.97	-0.009322	0.048784	0
4.598	-0.018578	-0.089333	0	4	3649.69	-0.102842	0.107357	0	4	4702.07	-0.097203	-0.131747	0	4	5474.3	-0.024838	-0.142277	0	4	6141.68	0.11854	-0.062529	0	4	6814.99	0.059005	-0.156492	0	4		967.463	-0.087571	0.049264	0	4	2390.08	-0.283277	-0.256557	0	4	3056.58	-0.032217	-0.037565	0	4	3744.01	-0.042177	-0.055883	0
4.638	0.16175	-0.002039	0	4	3649.73	-0.141387	0.113448	0	4	4702.11	0.013308	-0.238035	0	4	5474.34	-0.148794	-0.095242	0	4	6141.72	0.123631	-0.126275	0	4	6815.03	0.008934	-0.265495	0	4		967.505	0.025998	-0.063643	0	4	2390.12	-0.208035	-0.165347	0	4	3056.62	-0.000733	0.028056	0	4	3744.05	-0.154918	0.041685	0
4.678	0.022226	0.099969	0	4	3649.77	-0.035738	-0.106523	0	4	4702.15	-0.022356	0.12497	0	4	5474.38	-0.038073	-0.152089	0	4	6141.76	0.254348	-0.120277	0	4	6815.07	0.011294	-0.241114	0	4		967.543	-0.033316	0.020087	0	4	2390.16	0.012317	-0.349992	0	4	3056.66	0.02775	0.043994	0	4	3744.09	-0.193271	0.071245	0
4.718	0.123115	0.20077	0	4	3649.81	-0.157183	0.092611	0	4	4702.19	-0.085994	-0.13188	0	4	5474.42	-0.114755	-0.262793	0	4	6141.8	-0.032708	-0.106916	0	4	6815.11	-0.10403	-0.188008	0	4		967.583	-0.067417	-0.007731	0	4	2390.2	-0.18516	0.059269	0	4	3056.7	-0.135387	0.034244	0	4	3744.13	-0.058961	0.11387	0
4.758	0.01283	0.152322	0	4	3649.85	-0.02748	0.146149	0	4	4702.23	0.010144	-0.093023	0	4	5474.46	-0.026463	-0.104423	0	4	6141.84	0.17204	-0.096234	0	4	6815.15	-0.085857	-0.197539	0	4		967.623	-0.124418	0.097484	0	4	2390.24	-0.135668	-0.140618	0	4	3056.75	-0.085876	-0.150063	0	4	3744.17	-0.05401	0.100992	0
4.798	-0.021017	0.038093	0	4	3649.89	-0.12949	0.156373	0	4	4702.27	-0.097464	-0.101694	0	4	5474.5	0.1775	-0.090572	0	4	6141.88	0.16043	-0.134888	0	4	6815.19	-0.076204	-0.13561	0	4		967.663	0.040198	-0.072327	0	4	2390.28	-0.03648	-0.039414	0	4	3056.79	0.063874	-0.01187	0	4	3744.21	-0.14866	0.085151	0
4.838	0.016523	-0.077534	0	4	3649.93	-0.146112	-0.068658	0	4	4702.31	-0.051853	-0.210807	0	4	5474.54	0.099124	-0.027998	0	4	6141.92	-0.020722	-0.093078	0	4	6815.23	-0.15473	-0.382954	0	4		967.703	0.08018	-0.109383	0	4	2390.32	-0.11016	-0.075919	0	4	3056.82	-0.006997	0.103012	0	4	3744.25	-0.063549	0.061797	0
4.878	0.015758	-0.008451	0	4	3649.97	-0.096636	0.021092	0	4	4702.35	-0.113092	-0.189512	0	4	5474.58	0.092561	-0.104886	0	4	6141.96	-0.009692	-0.072675	0	4	6815.27	-0.044219	-0.383669	0	4		967.743	0.094135	-0.130823	0	4	2390.36	-0.131341	-0.040886	0	4	3056.86	-0.007073	0.123811	0	4	3744.29	-0.093313	0.007889	0
4.918	-0.181373	-0.146508	0	4	3650.01	-0.221601	-0.008356	0	4	4702.39	-0.105034	-0.152946	0	4	5474.62	-0.149438	-0.044394	0	4	6142	-0.006576	-0.136383	0	4	6815.31	-0.071227	-0.286568	0	4		967.783	-0.102119	0.034382	0	4	2390.4	-0.058897	-0.044861	0	4	3056.9	0.012253	0.034311	0	4	3744.33	-0.183987	-0.085012	0
4.958	-0.008907	0.058641	0	4	3650.05	-0.263147	0.085341	0	4	4702.43	-0.050174	0.007943	0	4	5474.66	0.018192	-0.35723	0	4	6142.04	0.000733	-0.189377	0	4	6815.35	-0.049998	-0.071013	0	4		967.823	0.040584	-0.044754	0	4	2390.44	-0.146182	-0.000873	0	4	3056.94	-0.102087	0.106442	0	4	3744.37	-0.127155	0.057314	0
4.998	0.141959	0.0009	0	4	3650.09	-0.143184	0.107612	0	4	4702.47	-0.009182	0.004877	0	4	5474.7	0.076216	-0.29166	0	4	6142.08	-0.039297	-0.079878	0	4	6815.39	-0.040396	-0.228198	0	4		967.863	0.013486	-0.06019	0	4	2390.48	-0.149667	-0.156064	0	4	3056.99	-0.12193	0.134643	0	4	3744.41	-0.142632	0.126726	0
5.038	0.108951	-0.096845	0	4	3650.13	-0.050671	0.154347	0	4	4702.51	-0.067805	-0.147924	0	4	5474.74	0.032778	0.074054	0	4	6142.12	0.018689	-0.130269	0	4	6815.43	0.257964	-0.125672	0	4		967.903	0.010265	-0.025009	0	4	2390.52	-0.113315	-0.221411	0	4	3057.03	0.020869	0.089486	0	4	3744.45	-0.125504	-0.052624	0
5.08	-0.196443	-0.06488	0	4	3650.17	-0.177481	0.166784	0	4	4702.55	-0.095062	-0.214656	0	4	5474.78	0.084232	-0.054624	0	4	6142.16	0.182547	-0.179675	0	4	6815.47	-0.057839	-0.237394	0	4		967.943	-0.068853	0.014057	0	4	2390.56	-0.126607	-0.005746	0	4	3057.07	-0.037933	0.120812	0	4	3744.49	-0.16828	0.053168	0
5.118	-0.044566	-0.206362	0	4	3650.21	-0.158483	0.195735	0	4	4702.59	-0.132584	-0.159066	0	4	5474.82	0.086182	-0.240747	0	4	6142.2	0.091031	-0.070375	0	4	6815.51	-0.058805	-0.148575	0	4		967.983	-0.149145	0.077281	0	4	2390.6	-0.11601	-0.158618	0	4	3057.11	0.045853	0.084877	0	4	3744.53	-0.083646	0.124059	0
5.158	-0.105144	-0.049071	0	4	3650.25	-0.112674	0.057455	0	4	4702.63	-0.072677	-0.164561	0	4	5474.86	-0.12885	-0.020113	0	4	6142.24	0.172537	-0.010591	0	4	6815.55	0.095992	-0.17273	0	4		968.023	0.003479	-0.05014	0	4	2390.64	-0.228948	-0.033026	0	4	3057.14	0.039074	-0.028178	0	4	3744.57	-0.15221	0.057671	0
5.198	-0.05757	0.135123	0	4	3650.29	-0.153146	0.207463	0	4	4702.67	-0.110074	-0.191867	0	4	5474.9	-0.069131	0.047653	0	4	6142.28	0.09971	-0.007016	0	4	6815.59	-0.160994	-0.114157	0	4		968.063	0.080833	-0.143327	0	4	2390.68	-0.166515	-0.158409	0	4	3057.18	0.163463	0.059378	0	4	3744.61	-0.077013	0.086645	0
5.238	0.040929	0.020356	0	4	3650.33	-0.037315	0.281701	0	4	4702.71	-0.091573	-0.195262	0	4	5474.94	0.065632	0.017897	0	4	6142.32	0.086775	-0.183952	0	4	6815.63	-0.117507	0.041891	0	4		968.103	-0.016325	-0.101975	0	4	2390.72	-0.098468	-0.352717	0	4	3057.22	0.037493	-0.022242	0	4	3744.65	-0.09374	0.132111	0
5.278	0.124297	-0.040971	0	4	3650.37	-0.11364	0.328259	0	4	4702.75	-0.017514	-0.340052	0	4	5474.98	0.181368	0.042764	0	4	6142.36	-0.085035	-0.16489	0	4	6815.67	-0.128133	0.059861	0	4		968.143	-0.010198	0.006243	0	4	2390.76	-0.077918	-0.442835	0	4	3057.26	0.042534	0.035072	0	4	3744.69	0.018307	-0.066983	0
5.318	-0.008562	0.030459	0	4	3650.41	-0.167254	0.21628	0	4	4702.79	0.181792	0.110253	0	4	5475.02	0.049759	-0.17436	0	4	6142.4	0.049785	-0.176756	0	4	6815.71	0.009854	0.104761	0	4		968.183	0.013751	-0.090063	0	4	2390.8	-0.183184	-0.507715	0	4	3057.3	0.01925	0.061611	0	4	3744.73	-0.159665	0.042058	0
5.358	-0.103527	-0.236487	0	4	3650.45	-0.032864	0.168984	0	4	4702.83	-0.066238	-0.004371	0	4	5475.06	-0.125925	-0.02747	0	4	6142.44	0.092331	-0.10573	0	4	6815.75	-0.136225	-0.280825	0	4		968.223	0.040542	0.011087	0	4	2390.84	-0.053844	-0.544658	0	4	3057.34	-0.070692	0.108968	0	4	3744.77	-0.078835	0.062554	0
5.398	0.064194	-0.044859	0	4	3650.49	-0.193341	0.093835	0	4	4702.87	-0.142413	-0.271586	0	4	5475.1	-0.037436	-0.032134	0	4	6142.48	0.262797	-0.141143	0	4	6815.79	-0.140412	-0.242062	0	4		968.263	-0.093806	0.040812	0	4	2390.88	-0.070297	-0.477243	0	4	3057.38	-0.111779	0.013355	0	4	3744.81	-0.06381	0.136782	0
5.438	0.033038	-0.066483	0	4	3650.53	0.027199	0.087586	0	4	4702.91	-0.154058	-0.285238	0	4	5475.14	0.001313	0.00679	0	4	6142.52	0.147972	-0.135564	0	4	6815.83	0.072603	-0.235143	0	4		968.303	-0.024172	0.063269	0	4	2390.92	-0.137497	-0.15388	0	4	3057.42	-0.137375	-0.059485	0	4	3744.85	-0.01932	0.126896	0
5.478	0.046376	0.113335	0	4	3650.57	-0.182808	0.048494	0	4	4702.95	-0.15284	-0.279781	0	4	5475.18	0.200873	-0.143572	0	4	6142.56	0.286851	-0.029705	0	4	6815.87	-0.002549	-0.364938	0	4		968.343	-0.046526	0.021788	0	4	2390.96	-0.081524	-0.168617	0	4	3057.46	-0.187498	0.060763	0	4	3744.89	-0.255297	0.041495	0
5.52	0.045501	-0.070615	0	4	3650.61	0.000682	0.10353	0	4	4702.99	-0.089894	-0.105415	0	4	5475.22	0.061612	-0.039027	0	4	6142.6	0.261854	0.06229	0	4	6815.91	-0.042205	-0.509364	0	4		968.383	-0.072594	-0.014495	0	4	2391	0.086654	-0.03464	0	4	3057.51	0.04716	-0.224996	0	4	3744.93	-0.178565	0.012111	0
5.558	0.165746	-0.057858	0	4	3650.65	-0.160659	0.040635	0	4	4703.03	0.168713	-0.200222	0	4	5475.26	0.03193	-0.033719	0	4	6142.64	0.05408	-0.023708	0	4	6815.95	-0.300137	-0.19972	0	4		968.423	-0.009587	-0.045341	0	4	2391.04	-0.190359	-0.199655	0	4	3057.54	0.068888	0.03626	0	4	3744.97	-0.069322	0.043849	0
5.598	0.20347	0.071952	0	4	3650.69	-0.175812	0.063904	0	4	4703.07	0.037525	-0.018051	0	4	5475.3	0.145251	-0.031503	0	4	6142.68	0.162921	-0.169721	0	4	6815.99	-0.455724	-0.087708	0	4		968.463	0.072696	-0.07091	0	4	2391.08	-0.179164	-0.319504	0	4	3057.58	-0.061178	0.043337	0	4	3745.01	-0.055074	0.132388	0
5.638	0.187963	-0.046684	0	4	3650.73	-0.042154	0.19195	0	4	4703.11	-0.125813	-0.205047	0	4	5475.34	0.063823	-0.047621	0	4	6142.72	0.141842	-0.132021	0	4	6816.03	-0.37651	-0.388217	0	4		968.503	-0.019132	0.02709	0	4	2391.12	-0.142046	-0.151232	0	4	3057.62	-0.109549	0.139343	0	4	3745.05	0.028126	0.023028	0
5.678	0.133395	-0.025283	0	4	3650.77	-0.184895	0.197745	0	4	4703.15	-0.139236	-0.254096	0	4	5475.38	0.142008	-0.012079	0	4	6142.76	0.056603	-0.186368	0	4	6816.07	-0.345682	-0.2886	0	4		968.543	-0.088377	0.047151	0	4	2391.16	-0.174556	-0.143743	0	4	3057.66	-0.007162	0.037826	0	4	3745.09	0.100054	-0.098145	0
5.718	0.120628	-0.199612	0	4	3650.81	-0.079466	0.024352	0	4	4703.19	-0.043512	-0.03311	0	4	5475.42	0.010673	-0.110723	0	4	6142.8	-0.041629	-0.078054	0	4	6816.11	-0.022869	-0.037488	0	4		968.583	0.119559	-0.225705	0	4	2391.2	-0.201383	-0.146069	0	4	3057.7	0.033109	0.049222	0	4	3745.13	-0.21096	-0.055967	0
5.758	-0.109313	0.077805	0	4	3650.85	-0.212247	0.196685	0	4	4703.23	-0.094042	-0.096119	0	4	5475.46	0.073368	-0.257987	0	4	6142.84	0.313958	-0.102574	0	4	6816.15	-0.118804	-0.193877	0	4		968.623	-0.204222	-0.016743	0	4	2391.24	-0.198171	-0.097085	0	4	3057.74	-0.043451	-0.013919	0	4	3745.17	0.037767	0.05322	0
5.798	0.125046	0.078953	0	4	3650.89	-0.089164	0.16479	0	4	4703.27	-0.246927	-0.200618	0	4	5475.5	0.039367	0.057652	0	4	6142.88	0.17887	-0.053774	0	4	6816.19	-0.025421	-0.373265	0	4		968.663	0.169965	0.062322	0	4	2391.28	-0.036652	-0.050907	0	4	3057.78	0.056966	0.033249	0	4	3745.21	0.010297	0.026536	0
5.838	0.071206	-0.039979	0	4	3650.93	-0.206289	0.171545	0	4	4703.31	-0.138634	0.150314	0	4	5475.54	-0.109428	0.003653	0	4	6142.92	0.090069	0.003685	0	4	6816.23	-0.108749	-0.097178	0	4		968.703	-0.104824	-0.169599	0	4	2391.32	-0.13879	0.041582	0	4	3057.82	-0.186765	0.034044	0	4	3745.25	-0.057202	0.109113	0
5.878	0.097203	-0.102857	0	4	3650.97	-0.117918	0.105927	0	4	4703.35	-0.055134	-0.096859	0	4	5475.58	-0.032134	-0.280541	0	4	6142.96	0.109179	-0.058225	0	4	6816.27	0.000414	-0.255622	0	4		968.743	0.010291	0.025904	0	4	2391.36	-0.082308	0.168033	0	4	3057.86	0.07535	0.146806	0	4	3745.29	-0.124453	-0.038109	0
5.918	0.087218	0.034292	0	4	3651.01	-0.239947	-0.077761	0	4	4703.39	-0.028413	-0.069055	0	4	5475.62	-0.119215	-0.249489	0	4	6143	0.173696	-0.063334	0	4	6816.31	0.024172	-0.08719	0	4		968.783	-0.038471	0.016151	0	4	2391.4	-0.188295	-0.055622	0	4	3057.9	0.128053	0.051474	0	4	3745.33	-0.028145	0.07032	0
5.958	0.090601	0.140319	0	4	3651.05	0.004601	0.12116	0	4	4703.43	0.002743	-0.0602	0	4	5475.66	0.065078	-0.205869	0	4	6143.04	0.157715	-0.057297	0	4	6816.35	-0.027664	-0.218338	0	4		968.823	-0.102555	0.077777	0	4	2391.44	-0.098391	-0.125031	0	4	3057.94	-0.139516	0.131854	0	4	3745.37	-0.053774	-0.022596	0
5.998	0.027889	0.015682	0	4	3651.09	-0.190668	0.067054	0	4	4703.47	-0.075356	-0.099948	0	4	5475.7	0.106127	-0.153506	0	4	6143.08	0.158792	-0.033249	0	4	6816.39	-0.049393	-0.295075	0	4		968.863	-0.029509	0.009979	0	4	2391.48	-0.054245	-0.233052	0	4	3057.98	-0.006302	-0.018531	0	4	3745.41	-0.172868	0.057616	0
6.038	0.162978	0.04659	0	4	3651.13	0.022959	0.163962	0	4	4703.51	0.046542	-0.165244	0	4	5475.74	0.257005	0.074608	0	4	6143.13	0.053404	-0.135713	0	4	6816.43	-0.152461	-0.257655	0	4		968.905	-0.033418	0.06497	0	4	2391.52	-0.11392	0.001862	0	4	3058.03	-0.180138	0.209344	0	4	3745.45	-0.065792	-0.104899	0
6.078	-0.06005	0.083846	0	4	3651.17	-0.154424	0.008079	0	4	4703.55	0.004403	-0.041121	0	4	5475.78	0.089387	0.10718	0	4	6143.16	-0.015134	-0.107135	0	4	6816.47	0.111304	-0.190572	0	4		968.943	-0.021346	-0.019958	0	4	2391.56	-0.261427	-0.167467	0	4	3058.06	-0.15351	-0.009911	0	4	3745.49	-0.170268	-0.003704	0
6.118	-0.017662	-0.061024	0	4	3651.21	0.042135	0.080718	0	4	4703.59	-0.078845	-0.124313	0	4	5475.82	0.008991	-0.046159	0	4	6143.2	0.231293	-0.14745	0	4	6816.51	0.096336	-0.177339	0	4		968.983	-0.123328	0.059778	0	4	2391.6	-0.09265	-0.0042	0	4	3058.1	0.060203	-0.001421	0	4	3745.53	-0.123854	-0.012263	0
6.158	0.052221	0.058649	0	4	3651.25	-0.188706	0.110011	0	4	4703.63	-0.163925	-0.346993	0	4	5475.86	0.052748	-0.041611	0	4	6143.24	0.018651	-0.09197	0	4	6816.55	-0.096158	-0.153538	0	4		969.023	0.030509	-0.037913	0	4	2391.64	-0.130494	-0.138357	0	4	3058.14	-0.014184	0.022168	0	4	3745.57	-0.056042	0.058212	0
6.198	0.077148	-0.096547	0	4	3651.29	-0.056109	0.125357	0	4	4703.67	-0.177462	-0.294592	0	4	5475.9	0.027043	-0.22861	0	4	6143.28	0.212235	-0.150523	0	4	6816.59	0.087304	-0.32439	0	4		969.063	-0.017813	0.035085	0	4	2391.68	-0.136324	-0.101807	0	4	3058.18	0.027266	0.006487	0	4	3745.61	-0.040622	0.116141	0
6.238	-0.012413	-0.162258	0	4	3651.33	-0.126581	0.067766	0	4	4703.71	-0.070035	-0.02134	0	4	5475.94	0.016414	-0.1464	0	4	6143.32	0.230956	-0.087924	0	4	6816.63	-0.09705	-0.186036	0	4		969.103	-0.10441	0.075078	0	4	2391.72	-0.061567	-0.079913	0	4	3058.22	-0.126428	0.170266	0	4	3745.65	-0.14448	0.061849	0
6.278	-0.030984	-0.175217	0	4	3651.37	-0.011741	0.189422	0	4	4703.75	-0.127011	-0.27837	0	4	5475.98	-0.079428	-0.163247	0	4	6143.36	0.358518	-0.039304	0	4	6816.67	-0.12805	-0.284175	0	4		969.143	-0.017568	0.054733	0	4	2391.76	-0.069143	0.115481	0	4	3058.26	-0.202014	0.014279	0	4	3745.69	-0.060108	0.078808	0
6.318	0.034247	0.169641	0	4	3651.41	-0.205933	0.036212	0	4	4703.79	-0.120544	0.039887	0	4	5476.02	0.006589	-0.228043	0	4	6143.4	0.20346	-0.041636	0	4	6816.71	-0.092895	-0.291851	0	4		969.183	0.092258	-0.081688	0	4	2391.8	-0.163265	0.027521	0	4	3058.3	-0.060305	0.074772	0	4	3745.73	-0.110976	0.140422	0
6.358	0.184784	0.106787	0	4	3651.46	-0.075522	0.230936	0	4	4703.83	-0.135919	-0.228149	0	4	5476.06	0.075286	-0.348488	0	4	6143.44	0.089158	-0.009444	0	4	6816.75	0.069503	-0.244461	0	4		969.223	0.003113	-0.106072	0	4	2391.84	-0.12725	0.070994	0	4	3058.34	0.026278	-0.063398	0	4	3745.77	-0.013012	-0.037185	0
6.398	0.194323	-0.09115	0	4	3651.49	-0.07455	0.285476	0	4	4703.87	-0.068245	-0.473468	0	4	5476.1	0.037691	0.007782	0	4	6143.48	0.199592	-0.135358	0	4	6816.79	-0.107745	0.081672	0	4		969.263	-0.104266	0.077404	0	4	2391.88	-0.192092	-0.147312	0	4	3058.38	0.114735	-0.011032	0	4	3745.81	0.002122	-0.014882	0
6.438	0.066811	-0.09216	0	4	3651.53	-0.189681	0.234086	0	4	4703.91	-0.100306	0.048056	0	4	5476.14	-0.170568	0.015101	0	4	6143.52	0.047829	-0.083492	0	4	6816.83	-0.156992	-0.027554	0	4		969.303	-0.03057	-0.03953	0	4	2391.92	-0.115417	-0.293129	0	4	3058.43	0.01997	0.040403	0	4	3745.85	-0.126237	-0.095977	0
6.478	0.18292	0.152638	0	4	3651.57	-0.092682	0.19685	0	4	4703.95	-0.117195	-0.1425	0	4	5476.18	-0.02185	-0.049618	0	4	6143.56	0.072304	-0.102271	0	4	6816.87	-0.038159	0.009061	0	4		969.343	-0.114184	0.030253	0	4	2391.96	-6.37207e-06	-0.261395	0	4	3058.47	-0.110772	0.172646	0	4	3745.89	-0.03525	0.043972	0
6.518	0.050967	-0.147149	0	4	3651.61	-0.161162	0.154888	0	4	4703.99	-0.126438	-0.347956	0	4	5476.22	0.118291	-0.073352	0	4	6143.6	0.24124	-0.091892	0	4	6816.91	-0.025383	-0.229702	0	4		969.383	-0.068449	0.09387	0	4	2392	-0.152363	-0.187231	0	4	3058.51	-0.043891	-0.044796	0	4	3745.93	-0.033931	-0.022074	0
6.558	0.038999	0.107198	0	4	3651.65	-0.149215	0.071657	0	4	4704.03	0.092188	0.024687	0	4	5476.26	-0.020875	-0.051371	0	4	6143.64	0.163163	-0.009567	0	4	6816.95	0.093042	-0.176402	0	4		969.423	-0.096129	0.023914	0	4	2392.04	-0.124587	-0.306243	0	4	3058.55	-0.015822	0.144271	0	4	3745.97	-0.168204	0.055403	0
6.598	-0.066625	-0.044133	0	4	3651.7	-0.218909	0.020805	0	4	4704.07	0.058798	-0.008024	0	4	5476.3	-0.10621	-0.177574	0	4	6143.68	0.172129	-0.117326	0	4	6816.99	-0.002377	-0.139688	0	4		969.463	-0.017001	-0.071155	0	4	2392.08	-0.153962	-0.171242	0	4	3058.58	-0.067691	0.113107	0	4	3746.01	-0.112314	0.064072	0
6.638	0.027492	-0.097436	0	4	3651.73	-0.080256	0.027624	0	4	4704.11	-0.17168	-0.207109	0	4	5476.34	-0.001287	-0.181678	0	4	6143.72	0.066422	-0.02613	0	4	6817.03	0.132408	-0.238905	0	4		969.503	-0.121289	0.079897	0	4	2392.12	-0.058508	-0.331641	0	4	3058.62	0.025762	0.024977	0	4	3746.05	-0.074413	0.047376	0
6.678	0.073309	-0.07861	0	4	3651.78	-0.184022	0.022992	0	4	4704.15	-0.139007	-0.202725	0	4	5476.38	-0.034314	-0.177832	0	4	6143.76	0.23181	-0.156618	0	4	6817.07	-0.0832	-0.094038	0	4		969.543	-0.021496	0.03245	0	4	2392.16	-0.123695	-0.286999	0	4	3058.66	-0.063103	0.095519	0	4	3746.09	0.006563	-0.081472	0
6.718	0.164313	0.173698	0	4	3651.82	-0.169532	0.167035	0	4	4704.19	0.100051	-0.26574	0	4	5476.42	-0.023609	-0.224068	0	4	6143.8	0.127288	-0.035903	0	4	6817.11	-0.221566	-0.246352	0	4		969.583	-0.126553	0.056119	0	4	2392.2	-0.129493	-0.360847	0	4	3058.7	-0.084347	0.074759	0	4	3746.13	-0.096161	0.003221	0
6.758	0.01102	0.00536	0	4	3651.85	-0.029136	0.01989	0	4	4704.23	0.238392	-0.238406	0	4	5476.46	0.020512	-0.238132	0	4	6143.84	0.189926	-0.171641	0	4	6817.15	-0.16035	-0.368088	0	4		969.623	0.018396	-0.153294	0	4	2392.24	-0.143008	-0.301214	0	4	3058.74	-0.130691	-0.032099	0	4	3746.17	-0.118074	0.042493	0
6.798	-0.029867	-0.144262	0	4	3651.89	-0.078596	0.189763	0	4	4704.27	0.006614	0.153248	0	4	5476.5	0.033995	-0.226787	0	4	6143.88	0.16742	-0.109132	0	4	6817.19	-0.080989	-0.345795	0	4		969.663	0.016051	-0.109905	0	4	2392.28	-0.272107	-0.229805	0	4	3058.78	-0.12379	-0.004996	0	4	3746.21	-0.117628	0.060722	0
6.838	0.092492	-0.004147	0	4	3651.93	-0.112031	0.175268	0	4	4704.31	-0.092965	-0.21733	0	4	5476.54	-0.159034	-0.094257	0	4	6143.92	0.045771	0.029486	0	4	6817.23	-0.059623	-0.429805	0	4		969.703	-0.116994	0.064519	0	4	2392.32	-0.310103	0.041865	0	4	3058.82	0.050977	0.115919	0	4	3746.25	-0.085615	-0.014885	0
6.878	-0.075624	-0.018752	0	4	3651.97	-0.037898	0.157926	0	4	4704.35	-0.112521	-0.210179	0	4	5476.58	0.026903	-0.09684	0	4	6143.96	0.149623	-0.222174	0	4	6817.27	-0.268519	-0.007289	0	4		969.745	-0.046911	0.05262	0	4	2392.36	-0.147915	-0.217955	0	4	3058.86	-0.00555	-0.033326	0	4	3746.29	-0.178061	0.000406	0
6.918	-0.053028	-0.166014	0	4	3652.01	-0.064469	0.226204	0	4	4704.39	-0.099086	-0.180725	0	4	5476.62	-0.036633	-0.246558	0	4	6144	0.215637	-0.230929	0	4	6817.31	0.026986	0.133229	0	4		969.783	0.039456	-0.143385	0	4	2392.4	-0.102437	0.04516	0	4	3058.9	-0.154344	-0.019359	0	4	3746.33	-0.039016	-0.069915	0
6.959	0.062661	-0.053641	0	4	3652.05	-0.125253	0.156254	0	4	4704.43	-0.067898	-0.023244	0	4	5476.66	-0.055596	-0.24219	0	4	6144.05	0.129041	-0.16248	0	4	6817.35	-0.131809	-0.07416	0	4		969.823	-0.125673	0.050623	0	4	2392.44	-0.317036	-0.038908	0	4	3058.95	-0.040711	0.084957	0	4	3746.37	-0.073043	-0.121907	0
7	-0.039607	0.171421	0	4	3652.09	-0.112528	0.008433	0	4	4704.47	-0.111444	-0.196331	0	4	5476.7	-0.119591	-0.069692	0	4	6144.08	0.051779	-0.044709	0	4	6817.39	0.008676	-0.213935	0	4		969.863	0.146417	-0.051654	0	4	2392.48	-0.167452	-0.222686	0	4	3058.98	-0.125957	0.019765	0	4	3746.41	-0.117087	0.00698	0
7.04	0.065782	0.028426	0	4	3652.13	0.00742	0.180876	0	4	4704.51	-0.161742	-0.159659	0	4	5476.74	0.130302	-0.00784	0	4	6144.12	0.345328	-0.086043	0	4	6817.43	-0.102686	-0.040061	0	4		969.903	-0.082544	-0.013883	0	4	2392.52	-0.09516	-0.328781	0	4	3059.02	0.002383	0.066829	0	4	3746.45	-0.015962	-0.138354	0
7.078	-0.029133	-0.039322	0	4	3652.17	-0.077924	-0.131557	0	4	4704.55	-0.146997	0.039842	0	4	5476.78	0.184593	-0.061826	0	4	6144.16	0.106923	-0.004078	0	4	6817.47	-0.17721	-0.016212	0	4		969.943	0.066442	-0.133651	0	4	2392.56	-0.088266	-0.042139	0	4	3059.06	0.063861	-0.100367	0	4	3746.49	-0.147743	-0.01427	0
7.118	-0.031762	0.148982	0	4	3652.21	-0.160047	-0.069915	0	4	4704.59	-0.135598	0.068771	0	4	5476.82	0.128461	0.163936	0	4	6144.2	0.129665	-0.073068	0	4	6817.51	-0.263632	-0.085917	0	4		969.983	-0.086013	0.023031	0	4	2392.6	-0.284111	-0.158808	0	4	3059.1	-0.022226	0.080741	0	4	3746.53	-0.041947	0.038464	0
7.158	0.019408	0.056518	0	4	3652.25	-0.157664	0.028233	0	4	4704.63	-0.049476	-0.477088	0	4	5476.86	0.064638	-0.160296	0	4	6144.24	0.152242	-0.067367	0	4	6817.55	-0.245369	-0.067447	0	4		970.023	0.014907	-0.099945	0	4	2392.64	-0.19294	-0.221994	0	4	3059.14	0.060573	0.019472	0	4	3746.57	-0.062873	-0.060432	0
7.198	-0.02748	0.092519	0	4	3652.29	-0.062813	0.125553	0	4	4704.67	-0.109826	0.05147	0	4	5476.9	0.046573	-0.153422	0	4	6144.28	0.099589	-0.047647	0	4	6817.59	-0.200825	-0.019301	0	4		970.063	0.05228	-0.067657	0	4	2392.68	-0.18277	-0.329309	0	4	3059.18	0.04426	-0.018148	0	4	3746.61	-0.317673	-0.190333	0
7.238	0.047673	-0.009008	0	4	3652.33	-0.129911	0.073422	0	4	4704.71	-0.078762	-0.316824	0	4	5476.94	0.081862	0.008633	0	4	6144.32	0.043113	0.025002	0	4	6817.63	-0.112594	-0.056785	0	4		970.103	0.071909	-0.101788	0	4	2392.72	-0.038424	-0.130968	0	4	3059.22	0.041966	0.199494	0	4	3746.65	-0.026425	-0.29541	0
7.278	0.046154	-0.160728	0	4	3652.37	-0.116446	0.047322	0	4	4704.75	0.110141	-0.10076	0	4	5476.98	0.20151	0.100364	0	4	6144.36	0.024641	-0.123228	0	4	6817.67	0.118559	-0.105402	0	4		970.143	-0.006264	-0.061073	0	4	2392.76	-0.130092	-0.040712	0	4	3059.26	0.017045	0.130227	0	4	3746.69	-0.129353	-0.068861	0
7.318	0.206205	0.231451	0	4	3652.41	-0.183519	-0.059253	0	4	4704.79	-0.001749	-0.17962	0	4	5477.02	0.01544	0.031483	0	4	6144.4	0.174372	-0.108391	0	4	6817.71	-0.036773	-0.045025	0	4		970.183	-0.053057	0.051055	0	4	2392.8	-0.033409	-0.083128	0	4	3059.3	-0.070386	0.065734	0	4	3746.73	-0.135904	-1.61057e-05	0
7.358	0.15563	-0.155039	0	4	3652.45	0.024134	-0.0067	0	4	4704.83	-0.130997	-0.2578	0	4	5477.06	-0.014554	0.021015	0	4	6144.44	0.202536	-0.046874	0	4	6817.75	-0.240268	-0.053748	0	4		970.223	0.023134	-0.055436	0	4	2392.84	-0.184319	-0.036102	0	4	3059.34	0.055909	0.076943	0	4	3746.77	-0.157231	0.099497	0
7.398	0.014259	-0.083782	0	4	3652.49	-0.124523	-0.064162	0	4	4704.87	-0.044579	-0.355632	0	4	5477.1	0.067888	-0.045888	0	4	6144.48	0.02573	0.005205	0	4	6817.79	-0.164979	0.055703	0	4		970.263	-0.051728	0.028958	0	4	2392.88	-0.118871	-0.037742	0	4	3059.39	0.179788	0.122033	0	4	3746.81	-0.016606	-0.037413	0
7.438	-0.058851	0.064044	0	4	3652.53	-0.039736	-0.010491	0	4	4704.91	-0.033938	0.03101	0	4	5477.14	0.306274	-0.150221	0	4	6144.52	0.263485	-0.140151	0	4	6817.83	-0.25964	0.019897	0	4		970.303	-0.113665	0.070614	0	4	2392.92	-0.116137	0.005379	0	4	3059.42	-0.142397	0.036276	0	4	3746.85	-0.033899	0.012408	0
7.478	0.07722	0.070522	0	4	3652.57	-0.165632	0.046085	0	4	4704.95	-0.0677	-0.207798	0	4	5477.18	0.149801	-0.069299	0	4	6144.56	0.002836	-0.061556	0	4	6817.87	-0.202259	0.093751	0	4		970.344	0.041951	-0.058367	0	4	2392.96	-0.128684	0.05358	0	4	3059.46	-0.072731	-0.073619	0	4	3746.89	-0.037124	0.071532	0
7.52	0.133041	-0.035062	0	4	3652.61	0.011358	-0.005727	0	4	4704.99	0.01824	-0.01243	0	4	5477.21	0.227782	-0.011603	0	4	6144.6	0.231943	-0.124948	0	4	6817.91	-0.155058	-0.352459	0	4		970.383	-0.073193	-0.004175	0	4	2393	-0.099844	-0.150217	0	4	3059.5	-0.013897	0.159697	0	4	3746.93	-0.047007	0.090933	0
7.558	0.031983	-0.16411	0	4	3652.65	-0.140992	0.256721	0	4	4705.03	-0.261191	-0.164419	0	4	5477.26	-0.131602	-0.182825	0	4	6144.65	0.008666	-0.061504	0	4	6817.95	-0.108889	-0.428903	0	4		970.423	-0.079058	0.082622	0	4	2393.04	-0.067589	-0.09885	0	4	3059.54	0.086246	0.033326	0	4	3746.97	-0.074439	0.007705	0
7.598	0.03725	-0.031615	0	4	3652.69	-0.061589	0.287325	0	4	4705.07	-0.241218	-0.160857	0	4	5477.3	-0.088667	0.055242	0	4	6144.69	0.183312	-0.322339	0	4	6817.99	-0.280951	-0.431641	0	4		970.463	-0.018001	0.240999	0	4	2393.08	-0.080065	0.020902	0	4	3059.58	0.027916	0.070565	0	4	3747.01	-0.079441	0.104316	0
7.638	0.137567	-0.129411	0	4	3652.73	-0.069414	0.32075	0	4	4705.11	-0.103282	-0.199829	0	4	5477.34	0.194928	-0.174714	0	4	6144.73	0.001504	-0.029518	0	4	6818.03	-0.27585	-0.410279	0	4		970.503	-0.119256	0.086127	0	4	2393.12	-0.309988	0.117533	0	4	3059.62	-0.122019	-0.017037	0	4	3747.05	-0.092739	0.093007	0
7.678	0.055736	0.124941	0	4	3652.77	0.027945	0.162152	0	4	4705.15	0.044652	-0.390697	0	4	5477.38	0.262517	5.15381e-05	0	4	6144.77	0.060394	0.016859	0	4	6818.07	-0.28098	-0.330124	0	4		970.543	-0.00944	0.026684	0	4	2393.16	-0.327563	-0.106532	0	4	3059.66	-0.178819	0.10584	0	4	3747.09	0.000484	0.023273	0
7.718	-0.008365	-0.001087	0	4	3652.81	-0.084522	0.233439	0	4	4705.19	-0.01738	-0.246185	0	4	5477.42	0.056603	0.104171	0	4	6144.81	0.016306	-0.043479	0	4	6818.11	-0.308322	-0.234199	0	4		970.585	0.145423	-0.148778	0	4	2393.2	-0.231561	-0.315468	0	4	3059.7	-0.099028	0.061089	0	4	3747.13	-0.048447	0.026893	0
7.758	0.11088	0.061274	0	4	3652.85	-0.127014	0.248462	0	4	4705.23	-0.054688	0.049754	0	4	5477.46	-0.024373	0.035883	0	4	6144.85	0.157288	-0.0957	0	4	6818.15	-0.163166	-0.133261	0	4		970.623	0.105646	0.081153	0	4	2393.24	-0.076962	0.030221	0	4	3059.74	-0.110887	-0.154985	0	4	3747.17	-0.127836	0.107905	0
7.798	0.052455	0.077549	0	4	3652.89	-0.206321	0.186503	0	4	4705.27	-0.079383	-0.286613	0	4	5477.5	-0.022831	-0.048671	0	4	6144.89	0.092911	-0.149622	0	4	6818.19	0.055354	-0.127061	0	4		970.663	-0.108226	0.035368	0	4	2393.28	-0.180113	0.090881	0	4	3059.78	-0.115519	-0.026407	0	4	3747.21	-0.123229	0.033812	0
7.838	0.015408	0.015421	0	4	3652.93	-0.011116	0.205808	0	4	4705.31	0.003412	0.062116	0	4	5477.54	0.129793	-0.129766	0	4	6144.93	0.175423	-0.07578	0	4	6818.23	0.110887	-0.093529	0	4		970.703	0.055724	-0.029944	0	4	2393.32	-0.184433	0.074537	0	4	3059.82	0.0137	0.016811	0	4	3747.25	-0.206353	0.009132	0
7.878	-0.016104	0.157206	0	4	3652.97	-0.117055	0.209419	0	4	4705.35	-0.093873	-0.166268	0	4	5477.58	-0.045465	-0.097413	0	4	6144.97	-0.066862	-0.064068	0	4	6818.27	-0.13837	-0.225698	0	4		970.745	0.02862	-0.059443	0	4	2393.36	-0.319738	0.005482	0	4	3059.86	-0.005053	-0.010256	0	4	3747.29	-0.083315	-0.180209	0
7.918	0.157621	0.06987	0	4	3653.01	-0.006206	0.334514	0	4	4705.39	-0.123233	-0.118373	0	4	5477.62	-0.062809	-0.084774	0	4	6145.01	0.25733	-0.061871	0	4	6818.31	-0.001806	-0.270958	0	4		970.783	-0.103893	0.088607	0	4	2393.4	-0.261516	-0.194224	0	4	3059.91	-0.0212	0.150968	0	4	3747.33	-0.1853	-0.067051	0
7.958	0.055181	-0.075502	0	4	3653.05	-0.093552	0.339111	0	4	4705.43	-0.012868	-0.019333	0	4	5477.66	-0.06504	-0.138373	0	4	6145.05	0.114589	-0.02479	0	4	6818.35	0.013639	-0.109254	0	4		970.823	-0.013544	0.156032	0	4	2393.44	-0.121241	-0.364075	0	4	3059.95	0.143525	0.103872	0	4	3747.37	-0.186281	0.073023	0
7.998	-0.003917	0.028435	0	4	3653.09	0.003642	0.454057	0	4	4705.47	0.07045	-0.068146	0	4	5477.7	-0.056272	-0.195748	0	4	6145.09	0.201829	-0.14258	0	4	6818.39	-0.108179	-0.244361	0	4		970.863	-0.16633	0.121018	0	4	2393.48	-0.173881	-0.313294	0	4	3059.99	-0.006856	0.025167	0	4	3747.41	-0.078096	0.078238	0
8.038	0.209413	0.05349	0	4	3653.13	-0.124631	0.424184	0	4	4705.51	-0.137452	0.05981	0	4	5477.74	0.053991	-0.141369	0	4	6145.12	0.004435	-0.158596	0	4	6818.43	-0.14363	-0.418235	0	4		970.903	0.05083	0.112314	0	4	2393.52	-0.182146	-0.218573	0	4	3060.03	-0.031752	0.047125	0	4	3747.45	-0.043349	0.031654	0
8.078	0.058932	0.057676	0	4	3653.17	-0.06605	0.26267	0	4	4705.55	-0.068761	-0.182284	0	4	5477.78	0.101609	0.09014	0	4	6145.16	0.171307	-0.141633	0	4	6818.47	-0.026508	-0.374843	0	4		970.943	-0.092526	0.026123	0	4	2393.56	-0.17478	-0.186793	0	4	3060.07	-0.079753	0.043276	0	4	3747.49	-0.077395	0.205051	0
8.118	-0.043639	-0.16469	0	4	3653.21	-0.111476	0.259327	0	4	4705.59	0.03886	-0.199948	0	4	5477.82	-0.104693	-0.189963	0	4	6145.2	0.21853	-0.081714	0	4	6818.51	-0.245956	-0.086104	0	4		970.983	0.108073	-0.037107	0	4	2393.6	-0.161984	-0.346948	0	4	3060.11	0.039023	0.037201	0	4	3747.53	-0.085768	-0.052186	0
8.158	0.10895	0.113315	0	4	3653.25	-0.094326	0.32956	0	4	4705.63	0.051971	-0.209209	0	4	5477.86	-0.191283	-0.198699	0	4	6145.24	-0.061166	-0.166217	0	4	6818.55	-0.079243	-0.101066	0	4		971.023	-0.02271	-0.070569	0	4	2393.64	-0.098786	-0.208272	0	4	3060.14	0.04152	0.014292	0	4	3747.57	-0.047051	-0.084088	0
8.198	0.021831	-0.070825	0	4	3653.29	-0.132443	0.214318	0	4	4705.67	0.003527	-0.038679	0	4	5477.9	0.058043	-0.141369	0	4	6145.28	0.083525	-0.079324	0	4	6818.59	0.158543	0.194637	0	4		971.063	-0.007302	0.027032	0	4	2393.68	-0.124179	-0.162789	0	4	3060.18	0.089923	0.036228	0	4	3747.61	-0.131182	0.088832	0
8.238	0.016754	0.148475	0	4	3653.33	0.040176	0.204368	0	4	4705.71	-0.099363	-0.224377	0	4	5477.94	-0.09467	-0.099127	0	4	6145.32	0.118616	-0.220441	0	4	6818.63	-0.073773	-0.098451	0	4		971.103	-0.088728	0.098032	0	4	2393.72	-0.168414	-0.170407	0	4	3060.22	0.043254	0.070562	0	4	3747.65	-0.010826	0.102277	0
8.278	0.185612	0.028388	0	4	3653.37	-0.079705	0.366358	0	4	4705.75	0.274773	-0.037832	0	4	5477.98	-0.111186	-0.29684	0	4	6145.36	0.15214	-0.056859	0	4	6818.67	-0.25285	-0.041343	0	4		971.143	0.003145	-0.054547	0	4	2393.76	-0.073266	0.005205	0	4	3060.26	0.058923	0.058251	0	4	3747.69	-0.150629	0.067821	0
8.318	0.106112	-0.062268	0	4	3653.41	-0.103349	0.344912	0	4	4705.79	-0.012502	0.010301	0	4	5478.02	0.021569	-0.222619	0	4	6145.4	0.142607	-0.092073	0	4	6818.71	-0.254491	-0.172827	0	4		971.183	-0.0041	-0.0425	0	4	2393.8	-0.168407	-0.133178	0	4	3060.3	-0.019951	0.044613	0	4	3747.73	-0.072215	0.084529	0
8.358	0.044729	0.052788	0	4	3653.45	-0.064473	0.220963	0	4	4705.83	-0.131494	-0.235996	0	4	5478.06	-0.053232	-0.245283	0	4	6145.44	0.193628	-0.124265	0	4	6818.75	-0.340883	-0.197707	0	4		971.223	0.033568	-0.085579	0	4	2393.84	-0.040667	-0.151532	0	4	3060.34	-0.090044	0.156737	0	4	3747.77	-0.105681	0.118338	0
8.398	0.141979	-0.206434	0	4	3653.49	-0.098946	0.275246	0	4	4705.87	0.116934	-0.09292	0	4	5478.1	0.328646	-0.147341	0	4	6145.48	0.20829	-0.033081	0	4	6818.79	-0.194823	-0.214817	0	4		971.263	-0.140721	0.103791	0	4	2393.88	-0.171899	-0.292111	0	4	3060.38	0.051034	-0.032227	0	4	3747.81	0.057884	-0.010804	0
8.438	-0.021546	0.07765	0	4	3653.53	-0.060519	0.258641	0	4	4705.91	-0.020932	0.060796	0	4	5478.14	0.076796	0.100113	0	4	6145.52	0.073183	-0.074743	0	4	6818.83	-0.136639	-0.099082	0	4		971.303	-0.023752	0.28498	0	4	2393.92	-0.165107	-0.30259	0	4	3060.42	-0.210119	0.124806	0	4	3747.85	-0.097639	0.026503	0
8.478	0.019707	0.164332	0	4	3653.57	-0.155265	0.312624	0	4	4705.95	-0.10901	-0.233145	0	4	5478.18	-0.033727	0.014444	0	4	6145.56	0.402071	-0.140796	0	4	6818.87	-0.157209	-0.084741	0	4		971.343	-0.083592	0.155961	0	4	2393.96	-0.106662	-0.300242	0	4	3060.46	0.062886	-0.01809	0	4	3747.89	-0.075165	0.033178	0
8.518	-0.106649	-0.075527	0	4	3653.61	-0.151123	0.144667	0	4	4705.99	0.018868	0.165463	0	4	5478.22	0.000847	-0.204239	0	4	6145.6	0.328397	-0.048053	0	4	6818.91	-0.173511	-0.22727	0	4		971.383	0.039759	-0.142026	0	4	2394	0.077911	-0.438406	0	4	3060.5	-0.107236	0.210485	0	4	3747.93	-0.214949	0.154708	0
8.558	0.319075	0.087331	0	4	3653.65	-0.003992	0.073042	0	4	4706.03	-0.070284	-0.186632	0	4	5478.26	-0.045866	-0.128182	0	4	6145.64	0.163915	-0.130875	0	4	6818.95	-0.069025	-0.137372	0	4		971.423	-0.06748	0.017111	0	4	2394.04	-0.179342	-0.144774	0	4	3060.55	-0.017198	-0.037835	0	4	3747.97	-0.004754	-0.012405	0
8.598	0.045084	0.035777	0	4	3653.69	-0.006181	0.139572	0	4	4706.07	-0.051187	-0.139372	0	4	5478.3	0.088578	-0.078093	0	4	6145.68	0.12776	-0.074369	0	4	6818.99	-0.141581	-0.147708	0	4		971.463	-0.001064	-0.059823	0	4	2394.08	-0.061675	-0.098232	0	4	3060.58	-0.216109	0.133087	0	4	3748.01	-0.151643	-0.071747	0
8.638	-0.006006	-0.119821	0	4	3653.73	-0.175254	0.028981	0	4	4706.11	-0.07138	-0.147782	0	4	5478.34	-0.038838	0.108127	0	4	6145.72	0.056871	-0.042654	0	4	6819.03	-0.043891	-0.314144	0	4		971.503	0.026215	-0.077281	0	4	2394.12	-0.148106	-0.200802	0	4	3060.62	-0.039532	0.2	0	4	3748.05	-0.068086	-0.007734	0
8.678	0.210106	0.122954	0	4	3653.77	0.036327	0.123865	0	4	4706.15	-0.08667	-0.160126	0	4	5478.38	-0.100551	-0.172859	0	4	6145.76	0.020104	-0.131416	0	4	6819.07	0.006965	-0.321466	0	4		971.543	-0.057352	-0.003975	0	4	2394.16	-0.264983	-0.376022	0	4	3060.66	0.04507	0.18707	0	4	3748.09	-0.070099	0.181733	0
8.718	0.110602	-0.066292	0	4	3653.81	-0.089247	0.115384	0	4	4706.19	-0.043336	-0.153113	0	4	5478.42	0.001166	-0.2109	0	4	6145.8	0.01686	0.019172	0	4	6819.11	0.189477	-0.131222	0	4		971.583	-0.111661	0.091351	0	4	2394.2	-0.115749	-0.345508	0	4	3060.7	-0.086265	0.041082	0	4	3748.13	0.009788	0.008961	0
8.758	0.081844	-0.026745	0	4	3653.85	-0.108918	0.135246	0	4	4706.23	-0.056393	-0.041028	0	4	5478.46	-0.072788	-0.135159	0	4	6145.84	0.233313	-0.151393	0	4	6819.15	-0.010992	-0.103385	0	4		971.623	0.005617	0.360657	0	4	2394.24	-0.164476	-0.069303	0	4	3060.74	-0.028566	0.012195	0	4	3748.17	-0.118871	0.075423	0
8.798	0.03792	-0.066185	0	4	3653.89	-0.082018	0.008169	0	4	4706.27	-0.076933	-0.187599	0	4	5478.5	-0.040437	-0.115709	0	4	6145.89	0.118062	-0.186813	0	4	6819.19	-0.110912	0.017365	0	4		971.663	-0.119932	0.176834	0	4	2394.28	-0.336509	-0.300886	0	4	3060.78	0.144098	-0.038547	0	4	3748.21	-0.248893	-0.046104	0
8.838	0.058723	-0.071619	0	4	3653.93	-0.094501	0.239153	0	4	4706.31	0.123975	-0.250875	0	4	5478.54	0.058693	-0.138483	0	4	6145.93	-0.004792	-0.043936	0	4	6819.23	-0.310696	-0.047521	0	4		971.703	0.018339	0.250655	0	4	2394.32	-0.158626	-0.380612	0	4	3060.82	-0.028012	-0.052711	0	4	3748.25	-0.159958	-0.022957	0
8.878	0.022796	0.082554	0	4	3653.97	-0.082601	0.381401	0	4	4706.35	0.017221	0.142532	0	4	5478.58	0.126294	-0.229158	0	4	6145.97	0.075012	-0.009444	0	4	6819.27	-0.029069	-0.031319	0	4		971.743	-0.034317	0.040979	0	4	2394.36	-0.227457	-0.380052	0	4	3060.86	-0.043948	0.087792	0	4	3748.29	-0.013872	0.06833	0
8.918	0.073816	0.029776	0	4	3654.01	-0.153159	0.335651	0	4	4706.39	-0.007627	-0.104168	0	4	5478.62	-0.082442	-0.013928	0	4	6146.01	0.040934	-0.065357	0	4	6819.31	-0.147469	-0.064339	0	4		971.783	0.088874	-0.154911	0	4	2394.4	-0.200019	-0.173052	0	4	3060.9	0.102686	0.185009	0	4	3748.33	-0.096473	0.060979	0
8.958	0.205968	0.014244	0	4	3654.05	-0.055163	0.221166	0	4	4706.43	-0.17002	-0.246426	0	4	5478.66	-0.059292	-0.143057	0	4	6146.05	-0.237474	-0.095287	0	4	6819.35	0.063147	0.015671	0	4		971.825	-0.086345	0.08181	0	4	2394.44	-0.17002	-0.443875	0	4	3060.94	0.018708	-0.024564	0	4	3748.37	-0.03158	0.086948	0
8.998	0.000597	-0.053273	0	4	3654.09	-0.006353	0.21714	0	4	4706.47	-0.166037	-0.182738	0	4	5478.74	0.102087	-0.206526	0	4	6146.09	0.103979	-0.173793	0	4	6819.39	0.039784	0.006301	0	4		971.865	0.014535	0.158273	0	4	2394.48	-0.077822	-0.547467	0	4	3060.98	-0.035015	0.108697	0	4	3748.41	0.111244	-0.016521	0
9.038	-0.049315	-0.104706	0	4	3654.13	-0.085109	0.267531	0	4	4706.51	-0.111986	-0.220899	0	4	5478.78	-0.03534	-0.18756	0	4	6146.12	0.051372	-0.219088	0	4	6819.43	0.005149	-0.172913	0	4		971.905	-0.096425	-0.000651	0	4	2394.52	-0.157033	-0.481018	0	4	3061.02	-0.096747	0.023173	0	4	3748.45	-0.235034	-0.259398	0
9.078	0.088381	0.006243	0	4	3654.17	-0.045783	0.412063	0	4	4706.55	-0.049607	-0.190768	0	4	5478.82	-0.023315	-0.101015	0	4	6146.16	0.055214	-0.174282	0	4	6819.47	0.134664	-0.257829	0	4		971.943	0.05645	-0.050424	0	4	2394.56	-0.174378	-0.183318	0	4	3061.06	-0.154548	0.110968	0	4	3748.49	0.004288	-0.090755	0
9.118	0.116684	-0.113316	0	4	3654.21	0.079014	0.467241	0	4	4706.59	0.006984	-0.125692	0	4	5478.86	0.120585	-0.163885	0	4	6146.2	0.091528	-0.052318	0	4	6819.51	-0.227709	-0.237971	0	4		971.983	0.024896	-0.033197	0	4	2394.6	-0.210425	-0.317587	0	4	3061.1	-0.135273	0.017771	0	4	3748.53	-0.071788	0.073403	0
9.158	0.098066	-0.034922	0	4	3654.25	0.004658	0.311834	0	4	4706.63	0.048562	-0.247843	0	4	5478.9	-0.009921	-0.026819	0	4	6146.24	0.076726	-0.020409	0	4	6819.55	-0.146994	-0.384899	0	4		972.023	0.033963	-0.015964	0	4	2394.64	-0.234499	-0.196911	0	4	3061.14	0.028719	-0.024155	0	4	3748.57	-0.041068	0.137542	0
9.198	0.135147	-0.04277	0	4	3654.29	-0.090652	0.038425	0	4	4706.67	0.22092	-0.138586	0	4	5478.94	-0.019237	-0.231992	0	4	6146.28	0.07131	-0.154344	0	4	6819.59	0.02106	-0.174208	0	4		972.063	-0.053044	-0.005038	0	4	2394.68	-0.171434	-0.339501	0	4	3061.18	-0.025208	0.112247	0	4	3748.61	-0.057266	0.057871	0
9.238	-0.060641	0.000367	0	4	3654.33	-0.132638	0.138966	0	4	4706.71	0.03707	-0.207193	0	4	5478.98	0.08998	-0.217304	0	4	6146.32	-0.14571	-0.063005	0	4	6819.63	0.017855	-0.043846	0	4		972.103	-0.083608	0.027637	0	4	2394.72	-0.140103	-0.201971	0	4	3061.22	0.139357	0.134002	0	4	3748.65	-0.040322	0.102232	0
9.278	0.040609	0.104411	0	4	3654.37	-0.077373	0.130188	0	4	4706.75	-0.111788	-0.247363	0	4	5479.02	-0.063307	-0.083337	0	4	6146.36	0.061267	-0.095178	0	4	6819.67	-0.284609	-0.283659	0	4		972.143	0.012263	0.00163	0	4	2394.76	-0.06402	-0.393232	0	4	3061.26	-0.083646	0.011876	0	4	3748.69	-0.01196	0.202062	0
9.318	0.11546	-0.06776	0	4	3654.41	-0.087234	0.07761	0	4	4706.79	-0.022439	-0.019684	0	4	5479.06	-0.016523	-0.007982	0	4	6146.4	0.231911	-0.221878	0	4	6819.71	-0.079335	-0.271622	0	4		972.183	-0.127368	0.107773	0	4	2394.8	-0.188562	-0.143965	0	4	3061.3	0.012062	0.074669	0	4	3748.73	-0.096836	0.096489	0
9.358	0.011858	0.112701	0	4	3654.45	-0.0871	0.120757	0	4	4706.83	-0.041151	-0.21732	0	4	5479.1	0.080664	-0.078286	0	4	6146.44	0.023774	-0.135004	0	4	6819.75	0.027018	-0.39034	0	4		972.223	0.008679	-0.030324	0	4	2394.84	-0.250187	-0.156959	0	4	3061.34	-0.091305	0.023179	0	4	3748.77	-0.131564	-0.080628	0
9.398	0.096881	-0.035463	0	4	3654.49	-0.140546	0.068182	0	4	4706.87	-0.11514	-0.15743	0	4	5479.14	0.258133	0.027579	0	4	6146.48	-0.024698	-0.095571	0	4	6819.79	-0.130111	-0.107177	0	4		972.263	-0.003463	-0.014334	0	4	2394.88	-0.479371	0.057513	0	4	3061.39	-0.088374	0.045395	0	4	3748.81	-0.0646	0.065283	0
9.438	0.013649	0.078644	0	4	3654.53	0.008331	0.041643	0	4	4706.91	-0.064288	-0.143788	0	4	5479.18	0.087361	0.169953	0	4	6146.52	0.237857	-0.124303	0	4	6819.83	-0.07894	-0.111348	0	4		972.303	-0.117721	0.063823	0	4	2394.92	-0.340351	-0.135703	0	4	3061.43	-0.131297	-0.058689	0	4	3748.85	-0.050174	0.142831	0
9.478	0.184914	0.11402	0	4	3654.57	-0.25445	0.320129	0	4	4706.95	0.010632	-0.152533	0	4	5479.22	0.041304	-0.029995	0	4	6146.56	-0.024877	-0.01963	0	4	6819.87	-0.075758	-0.377401	0	4		972.343	0.023057	0.178116	0	4	2394.96	-0.194495	-0.223785	0	4	3061.46	0.057852	-0.064745	0	4	3748.89	-0.001039	-0.048668	0
9.518	0.12739	0.084458	0	4	3654.61	0.038	0.250053	0	4	4706.99	-0.059617	-0.157684	0	4	5479.26	0.191251	-0.126455	0	4	6146.6	0.137242	-0.193764	0	4	6819.91	-0.159276	-0.631596	0	4		972.383	0.24932	-0.127041	0	4	2395	-0.125205	-0.291718	0	4	3061.5	0.02373	0.003463	0	4	3748.93	-0.127065	0.062406	0
9.558	0.098047	-0.184031	0	4	3654.65	-0.050817	0.327376	0	4	4707.03	0.001354	0.106639	0	4	5479.3	-0.06367	-0.085856	0	4	6146.65	-0.017689	-0.114769	0	4	6819.95	0.006582	-0.330813	0	4		972.423	-0.198917	0.085746	0	4	2395.04	-0.154994	-0.160889	0	4	3061.54	-0.172269	0.194766	0	4	3748.97	-0.030019	0.027631	0
9.598	-0.023107	0.205449	0	4	3654.69	-0.131596	0.334105	0	4	4707.07	-0.022395	-0.021559	0	4	5479.34	-0.031395	-0.093071	0	4	6146.69	0.221028	-0.044606	0	4	6819.99	0.055775	-0.205486	0	4		972.463	-0.025039	-0.029589	0	4	2395.08	-0.073355	-0.303353	0	4	3061.58	-0.036072	0.149074	0	4	3749.01	-0.1589	0.166768	0
9.638	0.108763	-0.14005	0	4	3654.73	0.106681	0.075072	0	4	4707.11	-0.080199	-0.103005	0	4	5479.38	0.021111	-0.225995	0	4	6146.73	0.233109	-0.129431	0	4	6820.03	0.078316	-0.170704	0	4		972.503	0.003454	-0.009161	0	4	2395.12	-0.178093	-0.312247	0	4	3061.62	-0.107911	0.036225	0	4	3749.05	-0.026826	0.096692	0
9.678	0.072065	-0.064017	0	4	3654.77	-0.034524	0.16249	0	4	4707.15	-0.065537	-0.139494	0	4	5479.42	0.03265	-0.225073	0	4	6146.77	0.306019	-0.038776	0	4	6820.07	0.014885	-0.159085	0	4		972.543	-0.159095	0.07263	0	4	2395.16	-0.181158	-0.32171	0	4	3061.66	-0.039653	0.002351	0	4	3749.09	0.064963	0.092147	0
9.718	0.067181	0.241725	0	4	3654.81	-0.015414	0.231902	0	4	4707.19	-0.135674	-0.222496	0	4	5479.46	0.045012	-0.043885	0	4	6146.81	0.246204	-0.089708	0	4	6820.11	-0.133559	-0.110034	0	4		972.583	0.067216	-0.073983	0	4	2395.2	-0.128486	-0.424883	0	4	3061.7	0.039449	0.063811	0	4	3749.13	-0.102119	0.162422	0
9.758	0.028402	0.049921	0	4	3654.85	-0.04095	0.37444	0	4	4707.23	-0.110224	-0.119227	0	4	5479.5	-0.072253	-0.010321	0	4	6146.84	-0.089496	-0.036856	0	4	6820.15	0.089343	0.042786	0	4		972.623	-0.083907	0.006429	0	4	2395.24	-0.11803	-0.458979	0	4	3061.74	0.033511	-0.000995	0	4	3749.17	-0.012419	0.060332	0
9.798	0.096072	0.013902	0	4	3654.89	-0.021843	0.315004	0	4	4707.27	0.019894	-0.223985	0	4	5479.54	-0.011476	-0.131409	0	4	6146.89	0.126715	-0.184919	0	4	6820.19	-0.05155	0.004352	0	4		972.663	-0.070415	0.113629	0	4	2395.28	-0.159831	-0.341572	0	4	3061.78	-0.199236	-0.025002	0	4	3749.21	-0.017791	0.087286	0
9.838	0.221318	-0.007373	0	4	3654.93	-0.125198	0.298753	0	4	4707.31	0.042715	0.026919	0	4	5479.58	0.080243	-0.165212	0	4	6146.93	0.031344	-0.087022	0	4	6820.23	-0.112824	0.21293	0	4		972.703	0.058747	-0.052485	0	4	2395.32	-0.1504	-0.219127	0	4	3061.82	-0.054628	-0.009982	0	4	3749.25	-0.029464	-0.071941	0
9.878	0.043676	0.018687	0	4	3654.97	-0.109205	0.274605	0	4	4707.35	-0.112387	-0.17311	0	4	5479.62	0.247007	-0.019552	0	4	6146.96	0.507765	-0.194724	0	4	6820.27	-0.031	0.105692	0	4		972.743	-0.065788	0.024687	0	4	2395.36	-0.318782	-0.262351	0	4	3061.86	-0.152987	0.040809	0	4	3749.29	-0.180234	0.014324	0
9.918	0.070711	-0.033099	0	4	3655.01	-0.073903	0.294369	0	4	4707.39	-0.056826	-0.205949	0	4	5479.66	0.107121	0.189009	0	4	6147	0.322994	-0.077996	0	4	6820.31	-0.045452	-0.025122	0	4		972.783	-0.074767	0.004129	0	4	2395.4	-0.250575	-0.314994	0	4	3061.9	0.060044	0.217384	0	4	3749.33	-0.043483	-0.14431	0
9.96	0.129348	-0.035566	0	4	3655.05	-0.093472	0.212186	0	4	4707.43	0.009173	-0.013091	0	4	5479.7	-0.08141	-0.148713	0	4	6147.04	0.076153	-0.021517	0	4	6820.35	-0.21226	-0.191925	0	4		972.823	0.112773	-0.161578	0	4	2395.44	-0.081244	-0.360934	0	4	3061.95	0.02141	-0.020676	0	4	3749.37	-0.185313	-0.050569	0
9.998	0.107355	-0.040514	0	4	3655.09	-0.077029	0.244368	0	4	4707.47	-0.137213	-0.331863	0	4	5479.74	0.1178	-0.181105	0	4	6147.09	0.083442	-0.112778	0	4	6820.39	-0.190012	-0.241891	0	4		972.863	0.06662	-0.066407	0	4	2395.48	-0.127339	-0.249547	0	4	3061.98	0.023373	0.003978	0	4	3749.41	-0.075579	0.073551	0
10.036	0.117294	-0.094189	0	4	3655.13	-0.087705	0.24258	0	4	4707.51	0.019349	-0.13492	0	4	5479.78	0.11355	0.155542	0	4	6147.12	0.118336	-0.178438	0	4	6820.43	-0.229047	-0.32898	0	4		972.903	-0.14795	0.054701	0	4	2395.52	-0.183076	-0.322258	0	4	3062.03	0.069131	0.001414	0	4	3749.45	-0.070564	-0.020744	0
10.078	4.14185e-05	0.055774	0	4	3655.17	0.044343	0.279288	0	4	4707.55	-0.221962	-0.230565	0	4	5479.82	0.090464	-0.089341	0	4	6147.16	0.1615	0.054804	0	4	6820.47	0.204174	-0.455049	0	4		972.943	-0.020518	-0.00717	0	4	2395.56	-0.160735	-0.035938	0	4	3062.06	0.147539	0.071325	0	4	3749.49	-0.172728	-0.01014	0
10.118	0.050349	-0.076318	0	4	3655.21	-0.077312	0.363466	0	4	4707.59	-0.080419	-0.201846	0	4	5479.86	-0.034186	-0.145067	0	4	6147.2	-0.147169	-0.075052	0	4	6820.51	0.277908	-0.260895	0	4		972.983	-0.052592	-0.021118	0	4	2395.6	-0.114481	-0.025337	0	4	3062.1	0.004186	0.006697	0	4	3749.53	-0.010629	-0.002954	0
10.158	0.004574	0.167583	0	4	3655.25	-0.070647	0.170762	0	4	4707.63	-0.097598	-0.302567	0	4	5479.9	0.113353	-0.18946	0	4	6147.24	0.228413	-0.167666	0	4	6820.55	-0.091971	-0.254415	0	4		973.023	-0.087954	0.071451	0	4	2395.64	-0.154848	-0.045882	0	4	3062.14	-0.0979	0.041327	0	4	3749.57	-0.164998	0.006565	0
10.198	0.147827	0.087979	0	4	3655.29	-0.133893	0.216073	0	4	4707.67	0.008484	0.003124	0	4	5479.94	-0.097333	-0.211345	0	4	6147.28	0.196744	-0.086971	0	4	6820.59	-0.205687	-0.113976	0	4		973.063	-0.059187	0.104648	0	4	2395.68	-0.363163	-0.202554	0	4	3062.18	0.033778	0.002158	0	4	3749.61	-0.080862	0.112215	0
10.238	0.058215	0.044819	0	4	3655.33	-0.070587	0.350949	0	4	4707.71	-0.073728	-0.257826	0	4	5479.98	0.09244	-0.191425	0	4	6147.32	0.154414	-0.061878	0	4	6820.63	0.013952	-0.400129	0	4		973.103	-0.125167	0.042725	0	4	2395.72	-0.213012	-0.259907	0	4	3062.22	0.041189	0.008861	0	4	3749.65	-0.144799	0.104722	0
10.278	0.132252	0.107309	0	4	3655.37	-0.102944	0.253248	0	4	4707.75	-0.010173	0.04793	0	4	5480.02	0.171562	0.160058	0	4	6147.36	0.329748	-0.057716	0	4	6820.67	0.029891	-0.128655	0	4		973.143	0.122857	-0.190105	0	4	2395.76	-0.14109	0.034788	0	4	3062.26	-0.106726	0.181092	0	4	3749.69	0.038201	0.062548	0
10.318	0.141895	0.164788	0	4	3655.41	-0.122204	0.380712	0	4	4707.79	-0.074219	-0.274936	0	4	5480.06	-0.094581	-0.107257	0	4	6147.4	0.2339	-0.008755	0	4	6820.71	0.20396	-0.275564	0	4		973.183	-0.082719	-0.000831	0	4	2395.8	-0.068219	-0.179259	0	4	3062.3	-0.03469	-0.02365	0	4	3749.73	-0.115876	0.11092	0
10.358	0.12759	0.067745	0	4	3655.45	-0.019808	0.063054	0	4	4707.83	-0.190209	0.032482	0	4	5480.1	-0.068226	-0.079188	0	4	6147.44	0.3752	-0.126829	0	4	6820.75	-0.038551	-0.408765	0	4		973.223	0.043193	-0.08612	0	4	2395.84	-0.196177	-0.156921	0	4	3062.34	-0.008073	0.113326	0	4	3749.77	-0.104094	-0.005862	0
10.398	0.037989	0.051609	0	4	3655.49	-0.081349	0.224751	0	4	4707.87	-0.038608	0.038792	0	4	5480.14	0.125364	-0.226259	0	4	6147.48	0.18718	-0.13389	0	4	6820.79	-0.207548	-0.322203	0	4		973.264	-0.012215	-0.033719	0	4	2395.88	-0.153044	-0.25501	0	4	3062.38	-0.058801	0.022645	0	4	3749.81	-0.059044	0.090304	0
10.438	0.040737	-0.040623	0	4	3655.53	-0.014665	0.396576	0	4	4707.91	-0.055036	-0.15827	0	4	5480.18	0.139548	0.128265	0	4	6147.52	0.073343	-0.069235	0	4	6820.83	-0.195345	-0.257014	0	4		973.303	0.068038	-0.015062	0	4	2395.92	-0.162813	0.112192	0	4	3062.42	-0.059572	0.086607	0	4	3749.85	-0.027553	0.097182	0
10.478	0.086088	-0.097085	0	4	3655.57	-0.034756	0.24965	0	4	4707.95	-0.069822	-0.186252	0	4	5480.22	0.010546	-0.127718	0	4	6147.56	0.081104	-0.189029	0	4	6820.87	0.076388	-0.024265	0	4		973.343	-0.124007	0.087228	0	4	2395.96	-0.17887	-0.080483	0	4	3062.46	0.057648	0.040254	0	4	3749.89	-0.024392	0.187196	0
10.52	0.121052	0.122057	0	4	3655.61	-0.067843	0.306529	0	4	4707.99	-0.079571	-0.171222	0	4	5480.26	0.053341	-0.10343	0	4	6147.6	0.182694	-0.095532	0	4	6820.91	0.042215	-0.212247	0	4		973.383	0.117243	0.108333	0	4	2396	-0.209189	-0.173867	0	4	3062.5	-0.041157	0.081388	0	4	3749.93	-0.117348	0.208903	0
10.558	0.082384	-0.158314	0	4	3655.65	-0.060665	0.378605	0	4	4708.03	0.006774	-0.039742	0	4	5480.3	0.045006	-0.049309	0	4	6147.65	0.16582	-0.110916	0	4	6820.95	0.24738	-0.133004	0	4		973.423	-0.082512	0.060699	0	4	2396.04	-0.170007	0.036177	0	4	3062.54	0.020703	0.105202	0	4	3749.97	-0.06107	-0.033513	0
10.598	0.035755	0.19809	0	4	3655.69	0.000395	0.13532	0	4	4708.07	-0.009268	0.00468	0	4	5480.34	0.054424	-0.104564	0	4	6147.69	0.126639	0.012717	0	4	6820.99	-0.029315	-0.288484	0	4		973.463	0.119358	-0.119936	0	4	2396.08	-0.218709	-0.118273	0	4	3062.58	0.012445	0.072169	0	4	3750.01	-0.265989	0.024429	0
10.638	-0.004253	0.121572	0	4	3655.73	-0.047306	0.170713	0	4	4708.11	-0.052433	-0.292878	0	4	5480.38	0.339224	0.030356	0	4	6147.73	-0.052111	0.045218	0	4	6821.03	-0.056046	-0.220225	0	4		973.503	-0.139306	0.076702	0	4	2396.12	-0.188996	-0.195858	0	4	3062.62	-0.081575	0.086011	0	4	3750.05	-0.093032	0.125057	0
10.678	0.183568	0.039684	0	4	3655.77	-0.047937	0.202806	0	4	4708.15	0.158183	-0.01914	0	4	5480.42	0.243929	0.082789	0	4	6147.77	0.20137	-0.103121	0	4	6821.07	0.176669	-0.442603	0	4		973.543	-0.067694	-0.120258	0	4	2396.16	0.05118	-0.249109	0	4	3062.66	-0.284475	-0.024036	0	4	3750.09	-0.041418	0.014495	0
10.718	0.072922	0.022512	0	4	3655.81	-0.00628	0.387512	0	4	4708.19	0.165202	-0.061691	0	4	5480.46	0.180884	-0.038544	0	4	6147.81	0.277421	0.000341	0	4	6821.11	-0.155494	-0.031593	0	4		973.583	0.026272	-0.071271	0	4	2396.2	-0.18328	-0.073542	0	4	3062.7	-0.133278	-0.031174	0	4	3750.13	0.005614	0.140808	0
10.758	0.026793	0.040651	0	4	3655.85	-0.136005	0.275581	0	4	4708.23	-0.00102	-0.01348	0	4	5480.5	-0.02654	-0.144687	0	4	6147.85	-0.039781	0.023804	0	4	6821.15	-0.199306	0.290482	0	4		973.623	0.050043	-0.037062	0	4	2396.24	-0.047848	0.130945	0	4	3062.74	-0.136496	0.049696	0	4	3750.17	-0.131666	0.188861	0
10.798	0.066268	-0.097048	0	4	3655.89	-0.151142	0.173116	0	4	4708.27	-0.091857	-0.292488	0	4	5480.54	-0.091012	-0.193487	0	4	6147.89	0.353229	-0.124716	0	4	6821.19	-0.230417	-0.036402	0	4		973.663	-0.023274	0.037049	0	4	2396.28	-0.200618	-0.098061	0	4	3062.78	0.049059	0.031406	0	4	3750.21	-0.088737	-0.02048	0
10.838	0.093795	0.095453	0	4	3655.93	-0.163259	0.203401	0	4	4708.31	-0.043556	-0.151815	0	4	5480.58	-0.032102	-0.166938	0	4	6147.93	0.129977	-0.072772	0	4	6821.23	-0.123494	-0.102963	0	4		973.703	-0.020308	0.007132	0	4	2396.32	-0.253889	-0.065949	0	4	3062.82	0.009112	0.279169	0	4	3750.25	-0.134164	-0.04268	0
10.878	0.034629	-0.032653	0	4	3655.97	0.046656	0.255945	0	4	4708.35	-0.055979	-0.157716	0	4	5480.62	0.16814	-0.051545	0	4	6147.97	0.077988	-0.081115	0	4	6821.27	-0.00627	0.093162	0	4		973.743	-0.205955	0.06238	0	4	2396.36	-0.397757	-0.232031	0	4	3062.86	-0.088024	0.132311	0	4	3750.29	0.043891	-0.01608	0
10.918	0.260967	-0.076154	0	4	3656.01	-0.047695	0.264535	0	4	4708.39	0.010288	0.054762	0	4	5480.66	0.032376	-0.160419	0	4	6148.01	0.243126	-0.094456	0	4	6821.31	-0.035161	-0.151123	0	4		973.783	-0.131564	0.083402	0	4	2396.4	-0.051276	-0.067898	0	4	3062.9	-0.22222	0.15819	0	4	3750.33	-0.072814	0.121028	0
10.958	0.03833	0.046858	0	4	3656.05	-0.030748	0.211602	0	4	4708.43	-0.034916	-0.176112	0	4	5480.7	0.063039	-0.185866	0	4	6148.05	0.074611	-0.176286	0	4	6821.35	0.100599	0.021929	0	4		973.823	-0.091927	0.060139	0	4	2396.44	-0.147106	-0.049167	0	4	3062.94	0.004021	-0.021356	0	4	3750.37	-0.026718	0.101169	0
10.998	0.170932	-0.004308	0	4	3656.09	-0.01976	0.374102	0	4	4708.47	0.008692	-0.015928	0	4	5480.74	-0.040769	-0.125676	0	4	6148.09	0.203772	-0.136344	0	4	6821.39	0.031583	-0.069229	0	4		973.863	0.041469	-0.073719	0	4	2396.48	-0.21609	-0.087041	0	4	3062.99	0.003543	0.167637	0	4	3750.41	-0.155995	0.029853	0
11.038	-0.038495	-0.110818	0	4	3656.13	-0.049125	0.193989	0	4	4708.51	-0.016258	-0.195809	0	4	5480.78	-0.117176	-0.138354	0	4	6148.12	0.194501	-0.049683	0	4	6821.43	-0.052764	0.025383	0	4		973.903	0.013267	-0.067019	0	4	2396.52	-0.163692	-0.025759	0	4	3063.02	-0.031096	0.11245	0	4	3750.45	-0.091624	-0.021582	0
11.078	0.087769	0.063329	0	4	3656.17	-0.092844	-0.020928	0	4	4708.55	0.003661	-0.02822	0	4	5480.82	0.09741	-0.136254	0	4	6148.16	0.204416	-0.130771	0	4	6821.47	-0.305209	-0.257526	0	4		973.943	0.177548	-0.115207	0	4	2396.56	-0.043464	-0.014502	0	4	3063.06	-0.047415	-0.057088	0	4	3750.49	-0.118482	-0.011019	0
11.118	0.056546	-0.058043	0	4	3656.21	-0.056479	-0.136508	0	4	4708.59	-0.116309	-0.141929	0	4	5480.86	0.144022	0.004484	0	4	6148.2	0.211119	0.02135	0	4	6821.51	-0.357648	-0.301981	0	4		973.983	-0.076825	-0.042132	0	4	2396.6	-0.387352	-0.039369	0	4	3063.1	-0.172243	0.068233	0	4	3750.53	-0.082002	0.061965	0
11.158	-0.020999	0.04197	0	4	3656.25	-0.041724	-0.078876	0	4	4708.63	0.036668	0.022532	0	4	5480.9	-0.041189	-0.035961	0	4	6148.24	0.176302	0.006371	0	4	6821.55	-0.053911	-0.191219	0	4		974.023	0.176994	-0.080631	0	4	2396.64	-0.171288	-0.241888	0	4	3063.14	-0.139695	0.094727	0	4	3750.57	-0.093096	0.173603	0
11.198	0.153041	-0.038228	0	4	3656.29	0.024762	-0.173036	0	4	4708.67	-0.096524	-0.201095	0	4	5480.94	-0.015911	-0.071735	0	4	6148.28	0.29265	-0.042055	0	4	6821.59	-0.241227	-0.345022	0	4		974.063	0.092503	-0.140531	0	4	2396.68	-0.14132	-0.31054	0	4	3063.18	0.053118	0.018415	0	4	3750.61	0.015376	-0.063472	0
11.238	-0.022839	0.044187	0	4	3656.33	-0.114092	0.017159	0	4	4708.71	0.136018	-0.266217	0	4	5480.98	-0.004703	-0.11408	0	4	6148.32	0.128913	0.001082	0	4	6821.63	-0.410782	-0.425128	0	4		974.103	-0.009533	-0.030356	0	4	2396.72	-0.085583	-0.012591	0	4	3063.22	-0.291172	0.029341	0	4	3750.65	-0.153325	0.093223	0
11.278	0.075885	-0.042321	0	4	3656.37	-0.011976	0.071213	0	4	4708.75	-0.008382	0.045431	0	4	5481.02	0.155453	0.007699	0	4	6148.36	0.179138	-0.137336	0	4	6821.67	-0.400918	-0.213216	0	4		974.143	-0.000382	-0.082313	0	4	2396.76	-0.01904	0.012575	0	4	3063.26	-0.208023	0.114051	0	4	3750.69	-0.097053	0.039717	0
11.319	0.102385	-0.032859	0	4	3656.41	-0.084557	-0.009528	0	4	4708.79	-0.070045	-0.294328	0	4	5481.06	0.196852	0.070742	0	4	6148.4	-0.026406	-0.002081	0	4	6821.71	-0.165766	-0.249364	0	4		974.183	0.049686	-0.090965	0	4	2396.8	-0.095173	0.147499	0	4	3063.3	-0.035556	-0.047831	0	4	3750.73	-0.197056	0.159659	0
11.358	0.000771	-0.087727	0	4	3656.45	-0.108641	0.157848	0	4	4708.83	0.216236	0.204152	0	4	5481.1	0.056023	-0.147418	0	4	6148.44	0.032593	-0.050456	0	4	6821.75	-0.175308	-0.301614	0	4		974.223	0.123644	-0.059037	0	4	2396.84	-0.218517	0.031239	0	4	3063.34	-0.080683	0.060029	0	4	3750.77	-0.231472	0.12077	0
11.398	-0.006154	0.052451	0	4	3656.49	-0.116415	0.190211	0	4	4708.87	0.061723	0.024049	0	4	5481.14	-0.087845	0.217568	0	4	6148.48	0.118419	-0.090668	0	4	6821.79	0.000736	-0.373941	0	4		974.263	-0.045898	0.007196	0	4	2396.88	-0.099385	0.068201	0	4	3063.38	-0.041074	0.100828	0	4	3750.81	-0.062121	0.094659	0
11.438	0.035594	0.013381	0	4	3656.53	0.023605	0.194531	0	4	4708.91	0.02156	-0.062516	0	4	5481.18	-0.029025	0.022599	0	4	6148.52	-0.067659	-0.206681	0	4	6821.83	-0.061796	-0.063827	0	4		974.303	0.07642	-0.128832	0	4	2396.92	-0.324103	-0.074659	0	4	3063.42	-0.030044	0.040876	0	4	3750.85	-0.158843	0.086903	0
11.478	0.091407	-0.073218	0	4	3656.57	0.033415	0.052769	0	4	4708.95	0.047765	0.046967	0	4	5481.22	0.135521	-0.137104	0	4	6148.56	0.004537	-0.0023	0	4	6821.87	-0.043203	0.121478	0	4		974.343	-0.121378	0.081153	0	4	2396.96	-0.210648	-0.23005	0	4	3063.46	-0.019014	0.009351	0	4	3750.89	-0.151184	0.03186	0
11.52	0.028783	-0.141593	0	4	3656.61	-0.077943	0.014215	0	4	4708.99	-0.030159	-0.129312	0	4	5481.26	0.071864	-0.06258	0	4	6148.6	0.186236	-0.087821	0	4	6821.91	-0.030121	0.045469	0	4		974.383	-0.022363	0.237397	0	4	2397	-0.176678	0.046288	0	4	3063.5	-0.043037	0.025231	0	4	3750.93	-0.124593	-0.060676	0
11.558	0.15797	0.061793	0	4	3656.65	-0.070354	0.140625	0	4	4709.03	0.18738	-0.09139	0	4	5481.3	0.156625	-0.233062	0	4	6148.64	0.184981	-0.147856	0	4	6821.95	0.002539	0.053819	0	4		974.423	-0.075331	0.010256	0	4	2397.04	-0.2284	-0.175455	0	4	3063.54	-0.042374	0.021243	0	4	3750.97	0.006646	0.0577	0
11.6	0.331352	0.000755	0	4	3656.69	-0.078854	0.064104	0	4	4709.07	0.008166	0.033799	0	4	5481.34	0.130991	0.046088	0	4	6148.68	0.065996	0.030639	0	4	6821.99	-0.042011	0.042342	0	4		974.463	0.027553	-0.082635	0	4	2397.08	-0.236448	-0.187885	0	4	3063.58	-0.082837	0.118686	0	4	3751.01	0.061968	-0.047402	0
11.638	0.134935	0.053883	0	4	3656.73	-0.184424	0.294128	0	4	4709.11	-0.049374	-0.16957	0	4	5481.38	0.170109	0.227747	0	4	6148.72	0.20297	-0.192765	0	4	6822.03	0.052579	0.03379	0	4		974.503	0.001526	0.018058	0	4	2397.12	-0.253029	-0.179768	0	4	3063.62	-0.063816	0.014202	0	4	3751.05	-0.211228	0.022996	0
11.678	0.012112	0.232221	0	4	3656.77	-0.186409	0.343598	0	4	4709.15	0.012422	-0.008584	0	4	5481.42	-0.10584	-0.232901	0	4	6148.76	0.368274	-0.136376	0	4	6822.07	-0.057164	0.20604	0	4		974.543	-0.081209	0.096814	0	4	2397.16	-0.15214	-0.42086	0	4	3063.66	-0.041144	0.071992	0	4	3751.09	-0.254399	-0.112962	0
11.72	-0.054752	0.08985	0	4	3656.81	-0.188269	0.253658	0	4	4709.19	-0.029002	-0.053619	0	4	5481.46	-0.05531	-0.2798	0	4	6148.81	0.227018	-0.188378	0	4	6822.11	-0.103747	0.08633	0	4		974.583	0.127027	0.099894	0	4	2397.2	-0.159831	-0.3314	0	4	3063.7	0.0917	0.157307	0	4	3751.13	-0.174263	0.074566	0
11.76	0.283576	0.052926	0	4	3656.85	-0.192067	0.127257	0	4	4709.23	-0.131341	-0.053445	0	4	5481.5	0.053895	-0.257697	0	4	6148.85	0.165597	-0.081366	0	4	6822.15	-0.086992	0.039752	0	4		974.623	-0.059098	0.099649	0	4	2397.24	-0.178571	-0.321656	0	4	3063.74	-0.112767	0.000525	0	4	3751.17	-0.095008	0.086255	0
11.798	0.002635	0.041596	0	4	3656.89	-0.044095	0.216869	0	4	4709.27	-0.005028	-0.0444	0	4	5481.54	0.023131	-0.051976	0	4	6148.89	0.051008	-0.031258	0	4	6822.19	0.140603	-0.08325	0	4		974.663	-0.115245	0.08594	0	4	2397.28	-0.341275	-0.294933	0	4	3063.78	-0.232581	-0.092862	0	4	3751.21	-0.072482	0.095039	0
11.838	0.030146	-0.117478	0	4	3656.93	-0.046965	0.102039	0	4	4709.31	-0.087374	-0.277832	0	4	5481.58	0.049511	-0.058747	0	4	6148.93	-0.072266	-0.06785	0	4	6822.23	-0.133747	0.000225	0	4		974.703	-0.025131	0.375378	0	4	2397.32	-0.149916	-0.207293	0	4	3063.82	0.029777	0.01808	0	4	3751.25	-0.014382	-0.01617	0
11.878	0.02239	0.050156	0	4	3656.97	-0.122535	0.062219	0	4	4709.35	-0.069162	-0.146716	0	4	5481.62	-0.006774	-0.022078	0	4	6148.97	0.085927	-0.159613	0	4	6822.27	-0.18624	-0.111886	0	4		974.745	-0.159053	0.153828	0	4	2397.36	-0.138835	-0.299233	0	4	3063.86	-0.214051	0.065511	0	4	3751.29	-0.126269	0.001588	0
11.918	0.044708	-0.023057	0	4	3657.01	-0.109638	0.17817	0	4	4709.39	-0.076073	-0.245141	0	4	5481.66	0.022882	-0.124896	0	4	6149.01	0.093982	-0.122216	0	4	6822.31	0.247689	-0.265717	0	4		974.785	0.062357	0.039472	0	4	2397.4	-0.130978	-0.272756	0	4	3063.9	-0.038309	0.054489	0	4	3751.33	-0.028056	0.011603	0
11.958	0.080809	-0.061134	0	4	3657.05	-0.091783	0.189058	0	4	4709.43	0.169835	0.095255	0	4	5481.7	0.025801	-0.04699	0	4	6149.05	0.219225	0.047048	0	4	6822.35	0.107102	-0.206922	0	4		974.825	-0.124619	0.055391	0	4	2397.44	-0.092956	-0.299324	0	4	3063.94	-0.081989	0.035391	0	4	3751.37	-0.053341	-0.054469	0
11.998	0.134728	-0.09986	0	4	3657.09	-0.172674	0.037272	0	4	4709.47	-0.00187	0.001617	0	4	5481.74	0.024316	-0.059932	0	4	6149.09	0.075133	-0.130887	0	4	6822.39	0.113327	-0.046761	0	4		974.863	-0.063211	-0.05568	0	4	2397.48	-0.085991	-0.133091	0	4	3063.98	-0.162749	0.038225	0	4	3751.41	-0.141059	-0.00757	0
12.038	0.007094	0.22101	0	4	3657.13	0.012805	0.223517	0	4	4709.51	-0.011084	-0.245521	0	4	5481.78	0.038704	-0.063785	0	4	6149.12	0.358053	-0.069866	0	4	6822.43	-0.072049	-0.193522	0	4		974.903	-0.143505	0.094617	0	4	2397.52	-0.192755	-0.03913	0	4	3064.02	0.076165	0.110546	0	4	3751.45	-0.071354	0.020052	0
12.078	0.050922	0.150369	0	4	3657.17	0.032909	0.35415	0	4	4709.55	0.05682	-0.005953	0	4	5481.82	-0.042833	-0.244464	0	4	6149.16	0.034384	-0.162577	0	4	6822.47	0.079163	-0.266626	0	4		974.943	-0.011183	0.177394	0	4	2397.56	-0.161207	-0.310736	0	4	3064.06	-0.141626	0.137462	0	4	3751.49	-0.141581	0.086365	0
12.118	0.065788	-0.115384	0	4	3657.21	-0.028015	0.352089	0	4	4709.59	-0.016797	0.032917	0	4	5481.86	0.100092	-0.22774	0	4	6149.2	0.325887	-0.102374	0	4	6822.51	-0.046427	-0.336454	0	4		974.983	-0.016437	-0.124522	0	4	2397.6	-0.230886	-0.066136	0	4	3064.1	-0.110836	0.055616	0	4	3751.53	-0.11327	-0.011	0
12.158	0.192653	-0.044721	0	4	3657.25	-0.017351	0.29301	0	4	4709.63	-0.068691	-0.271683	0	4	5481.9	0.233753	0.199775	0	4	6149.24	0.106726	-0.029673	0	4	6822.55	-0.04736	-0.030575	0	4		975.023	-0.11803	0.064886	0	4	2397.64	-0.170351	-0.340454	0	4	3064.14	-0.147826	0.092633	0	4	3751.57	-0.055233	0.06078	0
12.198	0.04192	-0.062983	0	4	3657.29	-0.046583	0.110517	0	4	4709.67	0.05919	-0.137961	0	4	5481.94	0.030083	-0.092305	0	4	6149.28	0.19619	-0.124568	0	4	6822.59	-0.057855	0.155842	0	4		975.063	-0.036168	0.324903	0	4	2397.68	-0.050938	-0.253645	0	4	3064.18	-0.173378	0.041147	0	4	3751.61	-0.044713	0.064162	0
12.238	0.109588	-0.098934	0	4	3657.33	-0.112751	0.058286	0	4	4709.71	-0.036445	-0.272894	0	4	5481.98	0.106484	0.109299	0	4	6149.32	0.169822	0.054121	0	4	6822.63	-0.187597	0.058657	0	4		975.103	-0.155428	0.298895	0	4	2397.72	-0.278466	-0.167502	0	4	3064.22	-0.191818	-0.122593	0	4	3751.65	-0.133463	0.030034	0
12.278	0.006657	0.069245	0	4	3657.37	0.065326	0.231545	0	4	4709.75	0.024188	-0.071422	0	4	5482.02	-0.064205	-0.130494	0	4	6149.36	0.063638	0.084677	0	4	6822.67	-0.058065	-0.10583	0	4		975.143	0.100309	0.348868	0	4	2397.76	-0.147628	-0.359108	0	4	3064.26	0.010992	0.128259	0	4	3751.69	-0.031676	0.05415	0
12.318	0.049202	-0.130821	0	4	3657.41	0.018036	0.332511	0	4	4709.79	-0.044716	-0.116869	0	4	5482.06	0.017587	-0.191735	0	4	6149.4	-0.023462	0.010862	0	4	6822.71	0.059611	0.127335	0	4		975.183	-0.064422	0.071213	0	4	2397.8	-0.159455	0.08727	0	4	3064.3	-0.094944	0.00689	0	4	3751.73	-0.034288	0.004175	0
12.358	0.076979	0.008236	0	4	3657.45	-0.01636	0.184787	0	4	4709.83	-0.066572	-0.166507	0	4	5482.1	0.13879	-0.194015	0	4	6149.44	0.08429	-0.19703	0	4	6822.75	-0.010928	0.0843	0	4		975.223	-0.091732	0.114299	0	4	2397.84	-0.31587	-0.157687	0	4	3064.34	-0.081276	0.020531	0	4	3751.77	-0.134202	0.108646	0
12.398	0.114251	-0.105769	0	4	3657.49	-0.102103	0.244619	0	4	4709.87	0.015347	-0.016402	0	4	5482.14	0.009743	0.121611	0	4	6149.48	0.304668	-0.199465	0	4	6822.79	-0.007204	-0.242483	0	4		975.263	-0.005585	0.035252	0	4	2397.88	-0.195482	-0.219449	0	4	3064.38	-0.134782	0.087463	0	4	3751.81	-0.049689	0.084616	0
12.438	0.124706	0.188866	0	4	3657.53	-0.125836	0.247202	0	4	4709.91	-0.008981	0.037265	0	4	5482.18	0.291739	-0.042809	0	4	6149.52	0.067346	-0.041881	0	4	6822.83	-0.229156	-0.225608	0	4		975.303	0.000389	0.006436	0	4	2397.92	-0.156568	-0.015713	0	4	3064.43	-0.188753	0.026185	0	4	3751.85	-0.094606	0.123311	0
12.478	-0.078829	0.101155	0	4	3657.57	-0.013079	0.323769	0	4	4709.95	-0.075362	-0.136524	0	4	5482.22	0.142282	0.212131	0	4	6149.56	0.143614	-0.00956	0	4	6822.87	-0.083888	-0.063495	0	4		975.343	-0.168971	0.064545	0	4	2397.96	-0.188212	0.052186	0	4	3064.46	-0.068321	0.015542	0	4	3751.89	-0.032262	0.154521	0
12.518	0.012751	0.025816	0	4	3657.61	-0.042855	0.156618	0	4	4709.99	-0.064157	-0.118782	0	4	5482.26	-0.049218	-0.165631	0	4	6149.6	0.103425	0.04487	0	4	6822.91	-0.020266	-0.281987	0	4		975.383	0.016446	0.168375	0	4	2398	-0.200446	-0.035194	0	4	3064.5	0.037117	0.136434	0	4	3751.93	-0.048116	0.023608	0
12.558	0.164272	0.056818	0	4	3657.65	-0.019929	0.026107	0	4	4710.03	0.029391	0.040409	0	4	5482.3	-0.047912	-0.347798	0	4	6149.65	0.22689	-0.113081	0	4	6822.95	-0.032434	-0.215796	0	4		975.423	0.027186	-0.0153	0	4	2398.04	-0.168892	0.025602	0	4	3064.55	-0.139924	0.148761	0	4	3751.97	-0.192264	0.103099	0
12.598	0.144358	-0.010775	0	4	3657.69	-0.069121	0.078286	0	4	4710.07	-0.059251	-0.223572	0	4	5482.34	0.114245	0.004323	0	4	6149.69	0.0636	-0.005618	0	4	6822.99	-0.131768	-0.34392	0	4		975.463	0.045697	-0.060976	0	4	2398.08	-0.116042	-0.346445	0	4	3064.58	0.020939	0.193078	0	4	3752.01	-0.059968	0.069718	0
12.638	0.055239	-0.026214	0	4	3657.73	-0.018039	-0.040837	0	4	4710.11	0.051225	-0.006964	0	4	5482.38	0.00924	-0.162951	0	4	6149.72	0.052385	0.020248	0	4	6823.03	-0.124928	-0.226726	0	4		975.503	-0.115484	0.096041	0	4	2398.12	-0.409406	-0.264535	0	4	3064.62	-0.091904	-0.013967	0	4	3752.05	0.00648	0.108971	0
12.678	-0.025361	0.142242	0	4	3657.77	-0.162545	0.047322	0	4	4710.15	-0.059897	-0.124545	0	4	5482.42	-0.058043	-0.14986	0	4	6149.76	0.06309	-0.129425	0	4	6823.07	0.042323	-0.365437	0	4		975.543	0.034543	-0.122145	0	4	2398.16	-0.176736	0.045006	0	4	3064.66	0.041705	-0.049989	0	4	3752.09	-0.129015	0.189657	0
12.718	-0.033299	0.065706	0	4	3657.81	-0.021716	0.256982	0	4	4710.19	0.06951	-0.293377	0	4	5482.46	0.103361	-0.093123	0	4	6149.81	0.164508	-0.095558	0	4	6823.11	-0.109778	-0.108971	0	4		975.583	0.046634	0.015738	0	4	2398.2	-0.190308	-0.05043	0	4	3064.7	-0.12697	0.088101	0	4	3752.13	-0.088189	0.073567	0
12.758	0.103699	0.107215	0	4	3657.85	-0.052171	0.233902	0	4	4710.23	0.093437	-0.077478	0	4	5482.5	-0.013891	-0.142432	0	4	6149.84	0.076529	-0.041681	0	4	6823.15	-0.036334	-0.090868	0	4		975.623	-0.061698	0.01637	0	4	2398.24	-0.244331	-0.167096	0	4	3064.74	-0.03381	-0.005334	0	4	3752.17	-0.042636	0.043595	0
12.798	0.032193	-0.077508	0	4	3657.89	-0.094714	0.239642	0	4	4710.27	0.074681	0.04623	0	4	5482.54	-0.079447	-0.282203	0	4	6149.88	0.144933	-0.055784	0	4	6823.19	-0.086402	0.024413	0	4		975.663	-0.131491	0.078473	0	4	2398.28	-0.296728	-0.144278	0	4	3064.78	-0.191806	0.036131	0	4	3752.21	-0.017479	0.092772	0
12.838	0.258137	0.189905	0	4	3657.93	0.003196	0.3332	0	4	4710.31	0.035222	-0.001459	0	4	5482.58	0.091783	-0.140957	0	4	6149.92	0.124173	-0.148443	0	4	6823.23	0.095062	-0.005991	0	4		975.703	0.179457	0.24708	0	4	2398.32	-0.280824	-0.17369	0	4	3064.82	0.040303	0.052121	0	4	3752.25	-0.126473	0.208352	0
12.878	0.086832	0.014828	0	4	3657.97	0.065412	0.128172	0	4	4710.35	-0.015261	-0.26374	0	4	5482.62	0.164227	-0.113635	0	4	6149.97	0.132348	-0.097066	0	4	6823.27	0.016067	-0.045199	0	4		975.743	-0.036493	-0.053181	0	4	2398.36	-0.142008	-0.369212	0	4	3064.86	0.095568	-0.010208	0	4	3752.29	-0.046408	0.082097	0
12.918	-0.006264	-0.036291	0	4	3658.01	-0.143091	0.238544	0	4	4710.39	-0.182783	-0.482851	0	4	5482.66	0.020652	-0.083124	0	4	6150	0.205512	-0.03837	0	4	6823.31	0.236388	-0.16727	0	4		975.783	0.068783	-0.114756	0	4	2398.4	-0.143792	-0.397964	0	4	3064.9	0.0101	0.164081	0	4	3752.33	0.100742	-0.143923	0
12.958	0.064172	0.057576	0	4	3658.05	-0.084159	-0.025814	0	4	4710.43	0.092284	-0.513384	0	4	5482.7	0.204314	-0.206487	0	4	6150.04	0.295358	-0.097787	0	4	6823.35	0.173505	-0.106793	0	4		975.823	0.049014	-0.069815	0	4	2398.44	-0.185293	-0.371828	0	4	3064.94	-0.061401	0.135906	0	4	3752.37	0.041374	0.020374	0
13	0.017017	-0.079586	0	4	3658.09	0.01241	0.105231	0	4	4710.47	-0.017058	0.022619	0	4	5482.74	0.146194	-0.08889	0	4	6150.08	0.122758	-0.053155	0	4	6823.39	-0.151107	-0.164551	0	4		975.863	-0.021496	0.025054	0	4	2398.48	-0.258732	-0.200783	0	4	3064.98	0.036493	0.168095	0	4	3752.41	-0.108523	0.134286	0
13.038	0.048243	0.156458	0	4	3658.13	-0.054061	0.169367	0	4	4710.51	0.000621	-0.093629	0	4	5482.78	0.153771	0.093419	0	4	6150.12	0.051314	-0.070292	0	4	6823.43	0.048753	-0.270465	0	4		975.903	0.04289	-0.030607	0	4	2398.52	-0.185242	-0.193055	0	4	3065.02	0.067334	0.181005	0	4	3752.45	-0.12604	0.102696	0
13.08	-0.039172	-0.009915	0	4	3658.17	-0.114528	0.145853	0	4	4710.55	0.006375	0.059903	0	4	5482.82	0.061822	-0.077314	0	4	6150.16	0.022105	-0.051094	0	4	6823.47	-0.076736	-0.216102	0	4		975.943	-0.182499	0.159742	0	4	2398.56	-0.21205	-0.073393	0	4	3065.06	-0.110536	0.123192	0	4	3752.49	-0.075445	0.018963	0
13.118	0.177801	0.183089	0	4	3658.21	-0.078255	0.078989	0	4	4710.59	-0.059745	-0.130759	0	4	5482.86	0.073712	-0.024783	0	4	6150.2	0.093223	-0.031921	0	4	6823.51	-0.298602	-0.124416	0	4		975.983	-0.076019	0.276792	0	4	2398.6	-0.253105	-0.063231	0	4	3065.1	0.001848	-0.028407	0	4	3752.53	-0.037238	0.137172	0
13.158	0.030004	-0.068357	0	4	3658.25	0.046111	0.099958	0	4	4710.63	-0.025702	0.032308	0	4	5482.9	0.083723	0.026284	0	4	6150.24	0.214815	-0.159117	0	4	6823.55	-0.490761	-0.286384	0	4		976.023	0.137226	0.305833	0	4	2398.64	-0.208513	-0.243698	0	4	3065.14	-0.004843	0.002091	0	4	3752.57	-0.046695	0.017355	0
13.198	0.130411	0.033411	0	4	3658.29	-0.054561	0.221379	0	4	4710.67	-0.123507	-0.250817	0	4	5482.94	0.007933	-0.033023	0	4	6150.28	0.33101	-0.057948	0	4	6823.59	-0.323507	-0.341379	0	4		976.063	-0.006276	0.073867	0	4	2398.68	-0.172696	-0.103949	0	4	3065.18	-0.192761	-0.036692	0	4	3752.61	-0.10194	0.165302	0
13.238	0.084737	0.06422	0	4	3658.33	-0.024539	0.279378	0	4	4710.71	-0.139896	0.041627	0	4	5482.98	0.15005	-0.07158	0	4	6150.32	0.334266	-0.090752	0	4	6823.63	-0.251617	-0.432807	0	4		976.103	-0.177249	0.110066	0	4	2398.72	-0.149189	0.085134	0	4	3065.22	-0.012923	-0.053242	0	4	3752.65	-0.127492	0.186584	0
13.278	0.112892	0.144337	0	4	3658.37	-0.034619	0.434811	0	4	4710.75	0.011247	-0.125292	0	4	5483.02	0.03778	0.096048	0	4	6150.36	-0.041387	-0.018232	0	4	6823.67	-0.314726	-0.391432	0	4		976.143	-0.081703	0.16757	0	4	2398.76	-0.218129	0.161433	0	4	3065.26	0.027973	-0.071583	0	4	3752.69	0.017402	0.05827	0
13.318	0.107443	-0.077151	0	4	3658.41	0.046777	0.525041	0	4	4710.79	-0.06179	-0.286893	0	4	5483.06	0.097607	-0.132562	0	4	6150.4	0.249779	-0.2641	0	4	6823.71	-0.295868	-0.425009	0	4		976.183	-0.120961	0.078776	0	4	2398.8	-0.323376	-0.184313	0	4	3065.3	-0.073891	0.154946	0	4	3752.73	-0.029554	0.102638	0
13.358	0.019293	0.139309	0	4	3658.45	0.021289	0.455803	0	4	4710.83	0.090665	-0.125035	0	4	5483.1	0.228687	0.298264	0	4	6150.44	0.269124	-0.043105	0	4	6823.75	-0.368822	-0.375552	0	4		976.223	0.133138	0.095436	0	4	2398.84	-0.046204	-0.121607	0	4	3065.35	-0.047918	-0.01272	0	4	3752.77	-0.075362	0.202065	0
13.398	0.056208	0.178699	0	4	3658.49	-0.097588	0.277504	0	4	4710.87	0.103664	-0.028768	0	4	5483.14	0.028636	0.024107	0	4	6150.48	0.118444	0.073796	0	4	6823.79	-0.047539	-0.231239	0	4		976.263	-0.039606	0.02517	0	4	2398.88	-0.131462	-0.130108	0	4	3065.39	-0.065167	0.063353	0	4	3752.81	-0.028815	-0.029357	0
13.438	0.229783	0.169166	0	4	3658.53	-0.135939	0.254956	0	4	4710.91	-0.036512	-0.061002	0	4	5483.18	0.08573	-0.025241	0	4	6150.52	0.122102	-0.157404	0	4	6823.83	0.031828	-0.110266	0	4		976.303	0.119941	-0.118235	0	4	2398.92	-0.283748	-0.184922	0	4	3065.42	0.08343	0.008204	0	4	3752.85	-0.17959	0.114878	0
13.478	0.035271	0.094816	0	4	3658.57	0.029296	0.273931	0	4	4710.95	0.154433	0.122052	0	4	5483.22	0.106095	-0.02479	0	4	6150.56	0.223048	0.009908	0	4	6823.87	-0.189423	-0.023434	0	4		976.343	0.045219	-0.009554	0	4	2398.96	-0.45805	-0.173735	0	4	3065.46	-0.095084	0.07732	0	4	3752.89	-0.09676	-0.00478	0
13.518	0.050519	-0.094303	0	4	3658.61	-0.123965	0.140625	0	4	4710.99	-0.004779	0.046739	0	4	5483.26	0.27275	0.022967	0	4	6150.6	0.047026	0.070929	0	4	6823.91	0.079695	0.11397	0	4		976.383	-0.144633	0.072353	0	4	2399	-0.328582	-0.313754	0	4	3065.5	0.007232	0.112511	0	4	3752.93	-0.136324	0.014492	0
13.56	0.136581	0.050602	0	4	3658.65	0.039653	0.071313	0	4	4711.03	0.049744	0.031677	0	4	5483.3	0.30008	0.211396	0	4	6150.65	0.058795	-0.134334	0	4	6823.95	-0.007159	0.037043	0	4		976.423	0.067267	0.140982	0	4	2399.04	-0.171071	-0.303373	0	4	3065.54	0.033364	0.119162	0	4	3752.97	-0.06843	0.098203	0
13.6	0.075022	-0.009689	0	4	3658.69	-0.081129	0.137008	0	4	4711.07	-0.098799	-0.2581	0	4	5483.34	0.239188	0.288014	0	4	6150.69	0.167413	-0.089502	0	4	6823.99	-0.134151	-0.089486	0	4		976.463	-0.037057	-0.030678	0	4	2399.08	-0.132259	-0.456676	0	4	3065.58	0.024985	-0.022184	0	4	3753.01	-0.199656	-0.143836	0
13.638	-0.040515	0.17913	0	4	3658.73	-0.003877	0.208426	0	4	4711.11	0.198952	-0.091925	0	4	5483.38	0.205773	-0.054353	0	4	6150.73	0.309421	-0.073203	0	4	6824.03	0.040581	0.123282	0	4		976.503	0.051684	-0.109306	0	4	2399.12	-0.153229	-0.478576	0	4	3065.62	0.006754	0.058924	0	4	3753.05	-0.046057	0.070887	0
13.678	-0.045267	0.216879	0	4	3658.77	-0.12654	0.31235	0	4	4711.15	0.07456	0.044539	0	4	5483.42	0.288413	0.07053	0	4	6150.77	0.060739	-0.120786	0	4	6824.07	-0.31146	0.007364	0	4		976.543	-0.069863	-0.006333	0	4	2399.16	-0.20232	-0.369915	0	4	3065.66	-0.0858	0.117977	0	4	3753.09	-0.002326	-0.035693	0
13.718	0.12451	-0.020544	0	4	3658.81	-0.009004	0.269238	0	4	4711.19	-0.075656	-0.012646	0	4	5483.46	0.142441	0.220106	0	4	6150.81	0.233039	-0.05005	0	4	6824.11	-0.052579	-0.005544	0	4		976.583	-0.060369	-0.013497	0	4	2399.2	-0.151955	-0.313838	0	4	3065.7	-0.120623	0.059288	0	4	3753.13	-0.083627	0.09149	0
13.758	0.122691	0.051018	0	4	3658.85	-0.108405	0.209683	0	4	4711.23	0.00332	-0.215548	0	4	5483.5	0.013388	-0.049373	0	4	6150.85	-0.075299	-0.052099	0	4	6824.15	-0.296932	-0.180039	0	4		976.623	-0.119884	0.086139	0	4	2399.24	-0.236659	-0.21235	0	4	3065.74	-0.279084	0.00871	0	4	3753.17	-0.188804	0.068581	0
13.798	0.10194	-0.054432	0	4	3658.89	-0.052764	0.274714	0	4	4711.27	-0.067044	-0.196073	0	4	5483.54	0.055858	-0.079278	0	4	6150.89	0.024488	-0.212208	0	4	6824.19	-0.203381	-0.142728	0	4		976.663	0.078969	-0.060609	0	4	2399.28	-0.360831	-0.361981	0	4	3065.78	-0.171434	-0.123588	0	4	3753.21	-0.032944	0.000618	0
13.838	0.083793	-0.093414	0	4	3658.93	-0.006764	0.241652	0	4	4711.31	0.008685	0.05588	0	4	5483.58	0.186332	-0.162815	0	4	6150.93	0.223437	-0.099069	0	4	6824.23	-0.0282	-0.229844	0	4		976.705	0.021267	-0.072984	0	4	2399.32	-0.173996	-0.378074	0	4	3065.82	-0.128225	0.120142	0	4	3753.25	-0.161341	0.020957	0
13.878	0.083936	0.142345	0	4	3658.97	0.093026	0.312537	0	4	4711.35	-0.071737	-0.310681	0	4	5483.62	0.071393	0.167776	0	4	6150.97	0.191525	-0.082931	0	4	6824.27	-0.123784	-0.238328	0	4		976.743	-0.001023	-0.043041	0	4	2399.36	-0.259203	-0.212086	0	4	3065.86	-0.132182	0.050929	0	4	3753.29	-0.073789	0.037294	0
13.918	0.066806	0.055126	0	4	3659.01	-0.095954	0.293332	0	4	4711.39	0.223472	0.161678	0	4	5483.66	0.009169	-0.037642	0	4	6151.01	0.158015	-0.005296	0	4	6824.31	-0.190576	-0.438895	0	4		976.783	0.074072	-0.046777	0	4	2399.4	-0.316125	-0.182612	0	4	3065.9	-0.004448	0.024274	0	4	3753.33	-0.19835	0.198728	0
13.958	-0.04604	0.020997	0	4	3659.05	-0.086577	0.432942	0	4	4711.43	0.007796	-0.014508	0	4	5483.7	0.044426	-0.080483	0	4	6151.05	0.261013	-0.121288	0	4	6824.35	0.138548	-0.188301	0	4		976.823	-0.050617	0.020963	0	4	2399.44	-0.22148	-0.19111	0	4	3065.94	-0.242005	0.095935	0	4	3753.37	-0.100965	0.084713	0
13.998	-0.030118	0.119981	0	4	3659.09	-0.055558	0.355519	0	4	4711.47	-0.051101	-0.308729	0	4	5483.74	0.191219	0.075883	0	4	6151.09	0.127257	-0.050069	0	4	6824.39	-0.029681	-0.256679	0	4		976.863	0.063157	-0.052195	0	4	2399.48	-0.198834	-0.189493	0	4	3065.98	-0.035333	0.02793	0	4	3753.41	-0.075592	0.175951	0
14.038	0.013299	0.04908	0	4	3659.13	-0.033214	0.063382	0	4	4711.51	0.042505	0.063157	0	4	5483.78	0.142518	-0.102799	0	4	6151.12	0.334661	-0.046004	0	4	6824.43	-0.104607	-0.228716	0	4		976.903	-0.003877	-0.018631	0	4	2399.52	-0.165699	-0.308388	0	4	3066.02	0.002453	0.049489	0	4	3753.45	-0.08782	0.180303	0
14.078	0.119811	0.01622	0	4	3659.17	-0.047106	0.137388	0	4	4711.55	-0.06201	-0.251493	0	4	5483.82	0.146851	0.134978	0	4	6151.16	0.205569	-0.000477	0	4	6824.47	-0.115239	-0.049518	0	4		976.943	-0.09172	0.057961	0	4	2399.56	-0.122082	-0.367244	0	4	3066.06	-0.027508	0.018889	0	4	3753.49	-0.199484	0.213081	0
14.118	0.004948	-0.111868	0	4	3659.21	-0.045468	-0.075671	0	4	4711.59	0.101364	0.114002	0	4	5483.86	0.117807	-0.020879	0	4	6151.2	0.147494	-0.10957	0	4	6824.51	-0.134049	0.045811	0	4		976.983	-0.012021	0.057426	0	4	2399.6	-0.127626	-0.257607	0	4	3066.1	0.06007	-0.026449	0	4	3753.53	-0.021104	-0.054521	0
14.158	-0.006879	0.140812	0	4	3659.25	-0.141317	-0.035287	0	4	4711.63	-0.001475	-0.061282	0	4	5483.9	0.098805	0.248265	0	4	6151.24	0.14334	0.059494	0	4	6824.55	-0.123163	-0.307367	0	4		977.023	-0.147708	0.067238	0	4	2399.64	-0.188454	-0.03627	0	4	3066.14	0.019416	0.060164	0	4	3753.57	-0.088056	-0.110414	0
14.198	-0.036762	0.066106	0	4	3659.29	-0.095364	0.037987	0	4	4711.67	-0.096636	-0.109209	0	4	5483.94	0.045809	0.042177	0	4	6151.28	-0.019263	-0.04056	0	4	6824.59	-0.023634	-0.316508	0	4		977.063	0.019957	0.188191	0	4	2399.68	-0.209577	-0.219601	0	4	3066.18	-0.159843	0.063253	0	4	3753.61	-0.108873	0.100103	0
14.239	0.132399	0.08243	0	4	3659.33	-0.119307	0.137951	0	4	4711.71	-0.047663	-0.110288	0	4	5483.98	0.158461	0.070704	0	4	6151.32	-0.057189	-0.110511	0	4	6824.63	0.141192	-0.149161	0	4		977.103	-0.027617	-0.00659	0	4	2399.72	-0.114678	-0.242828	0	4	3066.22	-0.080256	0.115925	0	4	3753.65	-0.067569	0.061594	0
14.279	0.057017	-0.010496	0	4	3659.37	0.084083	0.224944	0	4	4711.75	-0.003345	-0.015912	0	4	5484.02	0.274343	-0.182696	0	4	6151.36	0.028955	-0.109293	0	4	6824.67	0.034119	-0.091371	0	4		977.143	-0.091458	0.018586	0	4	2399.76	-0.206251	-0.222764	0	4	3066.26	-0.006162	0.242232	0	4	3753.69	-0.012559	0.046433	0
14.319	0.130852	0.074014	0	4	3659.41	0.010619	0.337745	0	4	4711.79	-0.056638	-0.310865	0	4	5484.06	0.094861	0.062245	0	4	6151.4	0.205244	-0.150337	0	4	6824.71	-0.145344	-0.268001	0	4		977.183	-0.024819	-0.022638	0	4	2399.8	-0.216243	-0.191525	0	4	3066.3	-0.137471	0.083273	0	4	3753.73	-0.039443	0.096995	0
14.359	0.073789	0.056605	0	4	3659.45	-0.052707	0.217884	0	4	4711.83	0.020238	0.058596	0	4	5484.1	0.117252	0.187831	0	4	6151.44	0.20021	-0.033274	0	4	6824.75	0.166945	-0.247785	0	4		977.223	-0.052458	0.014018	0	4	2399.84	-0.195712	-0.323453	0	4	3066.34	-0.012362	-0.028262	0	4	3753.77	0.12149	-0.016437	0
14.399	0.070735	0.043141	0	4	3659.49	-0.037216	0.185511	0	4	4711.87	0.027887	-0.158132	0	4	5484.14	0.121337	-0.097594	0	4	6151.48	0.04556	-0.019662	0	4	6824.79	0.055975	-0.067947	0	4		977.263	-0.094125	0.0157	0	4	2399.88	-0.228107	-0.455384	0	4	3066.38	-0.120292	0.054005	0	4	3753.81	0.037481	-0.310385	0
14.439	0.197842	-0.029679	0	4	3659.53	-0.068548	0.17962	0	4	4711.91	0.068054	-0.150878	0	4	5484.18	0.167088	0.062754	0	4	6151.52	0.271195	-0.108636	0	4	6824.83	0.031739	-0.173007	0	4		977.303	-0.040475	-0.044819	0	4	2399.92	-0.134814	-0.376354	0	4	3066.42	-0.011597	0.039897	0	4	3753.85	-0.068098	-0.027895	0
14.479	0.131379	-0.145281	0	4	3659.57	-0.067773	0.181784	0	4	4711.95	0.134215	-0.015004	0	4	5484.22	0.017115	0.033133	0	4	6151.56	0.111549	-0.167202	0	4	6824.87	-0.023424	-0.435426	0	4		977.343	-0.008188	-0.044117	0	4	2399.95	-0.170797	-0.388723	0	4	3066.46	-0.120617	0.063717	0	4	3753.89	-0.233855	-0.119185	0
14.519	0.032934	0.176737	0	4	3659.61	-0.090926	0.086813	0	4	4711.99	0.069185	0.060731	0	4	5484.26	-0.015809	-0.138431	0	4	6151.6	0.193864	-0.115426	0	4	6824.91	-0.023599	0.009006	0	4		977.383	-0.087508	0.120515	0	4	2400	-0.154166	-0.364481	0	4	3066.5	-0.028235	-0.015925	0	4	3753.93	-0.165228	-0.021456	0
14.559	0.062529	0.181772	0	4	3659.65	-0.106044	0.131921	0	4	4712.03	0.002335	0.043975	0	4	5484.3	0.08436	-0.016885	0	4	6151.64	0.230854	-0.014109	0	4	6824.95	-0.099685	-0.148352	0	4		977.423	0.077985	0.03752	0	4	2400.04	-0.057457	-0.363479	0	4	3066.54	-0.099621	0.059327	0	4	3753.97	-0.134782	-0.132157	0
14.599	0.06572	-0.083249	0	4	3659.69	-0.159866	0.046078	0	4	4712.07	0.122806	0.084313	0	4	5484.34	0.284303	0.354221	0	4	6151.68	0.001899	-0.025015	0	4	6824.99	-0.255364	-0.12652	0	4		977.463	0.0504	-0.10642	0	4	2400.08	-0.2062	-0.209634	0	4	3066.58	-0.107057	0.132218	0	4	3754.01	-0.029025	0.076334	0
14.639	0.197418	0.071445	0	4	3659.73	0.004139	0.191348	0	4	4712.11	0.121385	0.058811	0	4	5484.38	0.135324	0.121971	0	4	6151.73	0.188932	-0.089258	0	4	6825.03	-0.202084	-0.151561	0	4		977.503	-0.001478	0.029377	0	4	2400.11	-0.174894	-0.213442	0	4	3066.62	-0.183688	-0.043356	0	4	3754.05	-0.068748	0.067012	0
14.679	0.035782	-0.026321	0	4	3659.77	-0.043779	0.195938	0	4	4712.15	0.064514	0.019681	0	4	5484.42	0.064982	-0.01349	0	4	6151.77	0.024074	0.019069	0	4	6825.07	-0.213483	-0.047389	0	4		977.543	-0.111317	0.082171	0	4	2400.16	-0.108854	-0.43836	0	4	3066.66	-0.128716	0.060145	0	4	3754.09	0.067378	0.002796	0
14.719	-0.002683	-0.032511	0	4	3659.81	-0.059028	0.101501	0	4	4712.19	0.161067	0.088368	0	4	5484.46	0.186217	-0.10106	0	4	6151.81	0.122465	-0.02738	0	4	6825.11	-0.078902	0.113996	0	4		977.583	0.046777	0.030182	0	4	2400.2	-0.31631	-0.57013	0	4	3066.7	-0.209125	-0.04738	0	4	3754.13	-0.107115	-0.070659	0
14.759	0.160713	0.083757	0	4	3659.85	-0.053057	0.146278	0	4	4712.23	-0.003196	0.013612	0	4	5484.5	0.227304	0.079839	0	4	6151.85	-0.15558	-0.11866	0	4	6825.15	-0.061048	0.072836	0	4		977.623	-0.025272	-0.015616	0	4	2400.24	-0.197846	-0.420084	0	4	3066.74	-0.1765	0.028143	0	4	3754.17	-0.044777	0.001836	0
14.799	0.099541	-0.121842	0	4	3659.89	-0.078934	0.063914	0	4	4712.27	-0.073546	-0.291509	0	4	5484.54	0.143869	-0.153513	0	4	6151.89	0.173798	-0.254637	0	4	6825.19	0.038417	-0.088311	0	4		977.664	-0.0543	0.025151	0	4	2400.28	-0.232236	-0.116447	0	4	3066.78	-0.172001	0.088037	0	4	3754.21	-0.100691	-0.099317	0
14.839	0.023225	-0.001206	0	4	3659.93	-0.029308	0.118051	0	4	4712.31	0.007089	0.052562	0	4	5484.58	0.135961	0.222355	0	4	6151.93	0.107758	0.049393	0	4	6825.23	-0.008781	0.023627	0	4		977.704	0.087272	0.012021	0	4	2400.32	-0.2163	-0.267863	0	4	3066.82	-0.02638	-0.000767	0	4	3754.25	-0.194552	0.061382	0
14.879	0.038761	0.064131	0	4	3659.97	-0.040561	0.111651	0	4	4712.35	-0.015513	-0.178947	0	4	5484.62	0.159225	-0.269138	0	4	6151.97	-0.090936	-0.121784	0	4	6825.27	-0.114178	-0.098943	0	4		977.744	-0.095845	0.032218	0	4	2400.36	-0.17297	-0.187115	0	4	3066.86	-0.023991	0.023128	0	4	3754.29	0.015956	-0.022989	0
14.919	0.015009	0.100701	0	4	3660.01	-0.074556	-0.00947	0	4	4712.39	0.051289	-0.067531	0	4	5484.66	0.140491	0.199613	0	4	6152.01	0.215102	-0.114286	0	4	6825.31	-0.067241	0.061031	0	4		977.784	-0.035349	0.008736	0	4	2400.4	-0.057138	-0.445199	0	4	3066.9	0.009909	-0.0019	0	4	3754.33	-0.153057	0.084983	0
14.959	0.190292	0.107645	0	4	3660.05	-0.13411	0.140367	0	4	4712.43	0.032631	-0.082915	0	4	5484.7	0.167707	-0.110118	0	4	6152.05	0.007748	-0.020113	0	4	6825.35	-0.013773	-0.054917	0	4		977.824	-0.06143	0.051448	0	4	2400.44	-0.116775	-0.350971	0	4	3066.94	0.007672	0.036966	0	4	3754.37	-0.073425	0.070298	0
14.999	0.052842	0.064096	0	4	3660.09	-0.121522	0.112917	0	4	4712.47	-0.099739	-0.158315	0	4	5484.74	0.117718	0.116811	0	4	6152.09	0.057457	-0.073049	0	4	6825.39	0.030962	-0.175275	0	4		977.864	-0.03951	-0.035883	0	4	2400.48	-0.209616	-0.324622	0	4	3066.98	-0.012508	0.055114	0	4	3754.41	-0.13101	0.25751	0
15.039	0.024102	-0.014295	0	4	3660.13	-0.071294	0.210894	0	4	4712.51	-0.07426	-0.149928	0	4	5484.78	0.116481	0.132195	0	4	6152.12	0.12386	-0.128111	0	4	6825.43	0.092685	-0.111818	0	4		977.904	-0.101934	0.085019	0	4	2400.52	-0.247179	-0.154054	0	4	3067.02	-0.065996	0.084339	0	4	3754.45	-0.152802	0.096505	0
15.079	0.075974	-0.085537	0	4	3660.17	-0.094319	0.318319	0	4	4712.55	-0.131997	-0.305518	0	4	5484.82	-0.029732	-0.170771	0	4	6152.16	0.185975	-0.092717	0	4	6825.47	-0.139042	-0.095974	0	4		977.944	0.091955	0.052698	0	4	2400.56	-0.443343	-0.166033	0	4	3067.06	0.03467	0.08757	0	4	3754.49	-0.136324	0.095668	0
15.119	-0.071973	0.003424	0	4	3660.21	-0.059467	0.383405	0	4	4712.59	0.032335	0.083054	0	4	5484.86	0.129856	-0.081108	0	4	6152.2	0.096613	-0.08507	0	4	6825.51	0.069749	0.110362	0	4		977.984	-0.036961	0.004329	0	4	2400.6	-0.367273	-0.078096	0	4	3067.1	-0.105598	0.047389	0	4	3754.53	-0.053991	0.075983	0
15.159	0.034315	-0.125899	0	4	3660.25	-0.17737	0.266336	0	4	4712.63	-0.033562	-0.264464	0	4	5484.9	-0.013471	0.077024	0	4	6152.24	0.27686	-0.113094	0	4	6825.55	-0.065225	-0.061414	0	4		978.024	-0.066875	0.009167	0	4	2400.64	-0.205467	-0.213126	0	4	3067.14	-0.128066	-0.031818	0	4	3754.57	-0.096053	0.037922	0
15.199	0.019581	0.139211	0	4	3660.29	-0.039297	0.339671	0	4	4712.67	-0.022898	0.029634	0	4	5484.94	0.030828	-0.019372	0	4	6152.28	-0.014815	-0.09398	0	4	6825.59	-0.073448	-0.034779	0	4		978.064	-0.228722	0.105737	0	4	2400.68	-0.244719	-0.27761	0	4	3067.18	-0.025182	0.051854	0	4	3754.61	-0.072444	-0.003089	0
15.239	0.263735	-0.051392	0	4	3660.33	-0.038911	0.362989	0	4	4712.71	0.191184	0.069982	0	4	5484.98	0.287495	-0.180519	0	4	6152.32	0.033899	0.051654	0	4	6825.63	-0.235751	-0.104326	0	4		978.104	-0.053006	-0.040374	0	4	2400.72	-0.070711	-0.3353	0	4	3067.22	-0.034721	0.010014	0	4	3754.65	-0.078128	-0.060155	0
15.279	0.108461	0.02628	0	4	3660.37	-0.098324	0.277539	0	4	4712.75	0.00519	0.070443	0	4	5485.02	-0.013859	0.090984	0	4	6152.36	0.060273	0.045199	0	4	6825.67	-0.193944	0.102029	0	4		978.144	0.034314	-0.059082	0	4	2400.76	-0.100851	-0.051999	0	4	3067.26	-0.134776	0.078257	0	4	3754.69	-0.089266	-0.121707	0
15.319	0.054352	0.131005	0	4	3660.41	-0.092898	0.231693	0	4	4712.79	-0.09675	-0.206503	0	4	5485.06	-0.060662	-0.024416	0	4	6152.4	0.271049	-0.203865	0	4	6825.71	-0.223679	0.017194	0	4		978.184	0.143164	-0.087595	0	4	2400.8	-0.223793	0.016663	0	4	3067.3	-0.059617	0.124461	0	4	3754.73	-0.141454	-0.004026	0
15.359	-0.009509	-0.185031	0	4	3660.45	-0.065773	0.283266	0	4	4712.83	0.000717	-0.013071	0	4	5485.1	0.100271	0.003459	0	4	6152.44	0.071093	-0.182625	0	4	6825.75	-0.008481	0.008626	0	4		978.224	-0.084548	0.056557	0	4	2400.84	-0.013834	-0.001591	0	4	3067.34	0.009208	0.176177	0	4	3754.77	-0.065154	-0.020767	0
15.399	0.112062	0.005843	0	4	3660.49	-0.097343	0.318061	0	4	4712.87	-0.039379	-0.182097	0	4	5485.14	0.369943	-0.049625	0	4	6152.48	0.241737	-0.1133	0	4	6825.79	-0.216832	-0.070623	0	4		978.264	-0.0868	0.095287	0	4	2400.88	-0.304795	-0.012485	0	4	3067.38	0.029821	-0.047824	0	4	3754.81	-0.215223	-0.014099	0
15.437	0.003885	-0.008114	0	4	3660.53	-0.034505	0.128156	0	4	4712.91	-0.032201	-0.145112	0	4	5485.18	0.173562	0.175075	0	4	6152.52	-0.047389	-0.079717	0	4	6825.83	-0.00779	0.087219	0	4		978.304	0.015455	-0.110807	0	4	2400.92	-0.217938	-0.256927	0	4	3067.42	0.001912	0.07847	0	4	3754.85	-0.040061	-0.045714	0
15.477	0.021149	-0.015755	0	4	3660.57	-0.023153	-0.040061	0	4	4712.95	-0.001797	-0.235526	0	4	5485.22	0.074145	-0.036869	0	4	6152.56	0.179208	-0.044065	0	4	6825.87	0.062513	0.130472	0	4		978.344	-0.015009	-0.044329	0	4	2400.96	-0.161067	-0.327054	0	4	3067.46	-0.084755	0.243769	0	4	3754.89	-0.071418	0.061565	0
15.517	0.05603	0.122872	0	4	3660.61	-0.045436	-0.123199	0	4	4712.99	0.161006	-0.265022	0	4	5485.26	-0.089349	-0.11417	0	4	6152.6	0.301093	-0.166494	0	4	6825.91	-0.073021	-0.033094	0	4		978.384	0.023182	-0.091557	0	4	2401	-0.200746	-0.238734	0	4	3067.5	0.051996	-0.029042	0	4	3754.93	-0.05984	-0.03924	0
15.559	0.205307	0.091743	0	4	3660.65	-0.102004	0.033999	0	4	4713.03	0.006235	0.027969	0	4	5485.3	-0.040297	-0.002674	0	4	6152.64	0.276873	0.040625	0	4	6825.95	-0.294409	-0.033065	0	4		978.424	0.109099	-0.00011	0	4	2401.04	-0.185548	-0.132231	0	4	3067.54	-0.051977	0.071976	0	4	3754.97	-0.071845	0.005821	0
15.597	-0.020631	0.135697	0	4	3660.69	-0.154972	0.209512	0	4	4713.07	-0.015446	-0.302561	0	4	5485.34	-0.014242	-0.084117	0	4	6152.68	-0.015134	0.099926	0	4	6825.99	0.090777	-0.036666	0	4		978.462	-0.108787	0.071232	0	4	2401.08	-0.262803	-0.185212	0	4	3067.58	-0.049791	0.284986	0	4	3755.01	-0.150572	0.038309	0
15.639	-0.054948	0.114869	0	4	3660.73	-0.016042	0.252066	0	4	4713.11	0.024083	-0.365238	0	4	5485.38	0.039093	-0.165199	0	4	6152.72	0.197987	-0.173877	0	4	6826.03	0.041575	-0.217913	0	4		978.504	0.109345	-0.057143	0	4	2401.12	-0.142511	-0.355941	0	4	3067.62	0.02877	0.224117	0	4	3755.05	0.019556	0.071274	0
15.677	0.107183	-0.027252	0	4	3660.77	-0.04817	0.318061	0	4	4713.15	-0.120251	0.172405	0	4	5485.42	0.056227	0.026561	0	4	6152.76	0.097028	-0.005405	0	4	6826.07	0.138484	-0.279272	0	4		978.542	-0.047689	-0.048742	0	4	2401.16	-0.12307	-0.211177	0	4	3067.66	-0.073336	0.065473	0	4	3755.09	-0.153605	0.149541	0
15.719	0.032348	0.019317	0	4	3660.81	-0.043508	0.349312	0	4	4713.19	-0.066356	-0.354878	0	4	5485.46	0.047612	0.220461	0	4	6152.8	-0.084653	-0.093078	0	4	6826.11	-0.05919	-0.143276	0	4		978.582	0.082005	-0.090372	0	4	2401.2	-0.106611	-0.192401	0	4	3067.7	-0.129468	0.029338	0	4	3755.13	-0.099901	0.137459	0
15.759	0.102573	-0.035149	0	4	3660.85	-0.02948	0.454592	0	4	4713.23	0.275452	0.094051	0	4	5485.5	0.049071	0.045895	0	4	6152.84	0.156517	-0.164967	0	4	6826.15	-0.163192	-0.231438	0	4		978.622	0.0302	0.020242	0	4	2401.24	-0.152133	-0.392015	0	4	3067.74	-0.063408	-0.001385	0	4	3755.17	-0.148883	0.023836	0
15.799	0.09961	-0.042137	0	4	3660.89	-0.081238	0.379439	0	4	4713.27	0.022427	-0.060602	0	4	5485.54	0.100411	-0.031135	0	4	6152.88	0.111766	-0.056441	0	4	6826.19	0.111753	-0.150453	0	4		978.662	-0.049039	0.00145	0	4	2401.28	-0.206258	-0.452781	0	4	3067.78	0.087858	-0.012395	0	4	3755.21	-0.097021	0.063537	0
15.839	0.115291	-0.01238	0	4	3660.93	-0.068563	0.210788	0	4	4713.31	4.46045e-05	-0.157694	0	4	5485.58	0.050027	0.131564	0	4	6152.92	0.003447	-0.078757	0	4	6826.23	-0.082263	-0.137452	0	4		978.702	-0.051168	0.029454	0	4	2401.32	-0.136719	-0.568694	0	4	3067.82	-0.059681	0.134679	0	4	3755.25	-0.125989	0.222425	0
15.879	0.112736	0.032413	0	4	3660.97	-0.099286	0.222838	0	4	4713.35	0.017479	-0.35032	0	4	5485.62	0.263536	-0.095552	0	4	6152.97	0.092159	-0.056937	0	4	6826.27	-0.300784	-0.14507	0	4		978.742	-0.092503	0.070118	0	4	2401.36	-0.185344	-0.457613	0	4	3067.86	0.00792	-0.034869	0	4	3755.29	-0.220181	0.238061	0
15.919	0.062854	0.031934	0	4	3661.01	-0.084079	0.247376	0	4	4713.39	0.080527	-0.17063	0	4	5485.66	-0.022009	0.077455	0	4	6153	0.258381	-0.116096	0	4	6826.31	-0.024236	-0.197848	0	4		978.782	0.035751	0.167641	0	4	2401.4	-0.199083	-0.392907	0	4	3067.9	0.036193	-0.00018	0	4	3755.33	-0.067582	-0.058715	0
15.959	-0.012359	-0.061583	0	4	3661.05	0.04319	0.370504	0	4	4713.43	-0.000389	0.053993	0	4	5485.7	0.186103	0.031161	0	4	6153.04	0.001529	0.03446	0	4	6826.35	0.010422	-0.105254	0	4		978.822	0.019527	0.074582	0	4	2401.44	-0.137522	-0.264574	0	4	3067.94	-0.00664	0.076073	0	4	3755.37	-0.109568	-0.057797	0
15.999	0.080543	0.071379	0	4	3661.09	-0.097763	0.220499	0	4	4713.47	-0.03952	-0.35349	0	4	5485.74	0.152777	0.037533	0	4	6153.09	0.081836	0.037468	0	4	6826.39	-0.127706	-0.044284	0	4		978.862	0.055861	-0.115774	0	4	2401.47	-0.1517	-0.14717	0	4	3067.98	0.084194	0.172785	0	4	3755.41	-0.058317	0.038563	0
16.039	0.157605	0.023284	0	4	3661.13	-0.127983	0.275816	0	4	4713.51	0.145095	-0.222448	0	4	5485.78	-0.058145	-0.090501	0	4	6153.12	0.151744	-0.13253	0	4	6826.43	-0.077408	0.057475	0	4		978.902	-0.004731	0.009232	0	4	2401.51	-0.223405	0.058969	0	4	3068.02	-0.092255	-0.030066	0	4	3755.45	-0.058948	0.136818	0
16.079	0.099618	-0.009805	0	4	3661.17	-0.004429	0.23817	0	4	4713.55	-0.018909	0.038518	0	4	5485.82	0.206627	0.027541	0	4	6153.16	0.216223	-0.054444	0	4	6826.47	-0.069111	0.075378	0	4		978.942	0.097461	0.013851	0	4	2401.55	-0.255864	-0.236263	0	4	3068.06	-0.185739	0.03579	0	4	3755.5	-0.069838	0.097587	0
16.119	0.196531	-0.081445	0	4	3661.21	-0.000663	0.059633	0	4	4713.59	0.04434	-0.040519	0	4	5485.86	0.41198	0.19857	0	4	6153.2	0.114003	0.062812	0	4	6826.51	-0.207526	-0.189824	0	4		978.982	-0.068254	-0.005167	0	4	2401.59	-0.164839	-0.391873	0	4	3068.1	-0.260184	-0.05721	0	4	3755.53	-0.087877	-0.105714	0
16.159	0.125426	0.154036	0	4	3661.25	-0.127311	0.25176	0	4	4713.63	0.048342	-0.013989	0	4	5485.9	-0.000847	-0.037545	0	4	6153.24	0.120795	-0.031065	0	4	6826.55	-0.118505	-0.010504	0	4		979.022	0.000124	-0.010829	0	4	2401.64	-0.324619	-0.452791	0	4	3068.14	-0.083461	0.036531	0	4	3755.57	-0.175277	0.010453	0
16.199	0.128117	0.101978	0	4	3661.29	0.032705	0.206761	0	4	4713.67	-0.007525	0.031567	0	4	5485.94	0.006729	-0.01963	0	4	6153.28	0.043241	-0.056015	0	4	6826.59	0.008083	0.084799	0	4		979.062	-0.044773	-0.058979	0	4	2401.68	-0.009564	-0.074824	0	4	3068.18	-0.181126	0.140557	0	4	3755.61	-0.0809	0.00278	0
16.239	-0.030091	0.007204	0	4	3661.33	-0.076889	0.166458	0	4	4713.71	-0.027301	-0.111332	0	4	5485.98	0.001357	-0.15321	0	4	6153.32	0.050327	-0.153996	0	4	6826.64	0.219394	-0.277433	0	4		979.104	-0.0284	-0.066059	0	4	2401.72	-0.064555	-0.198325	0	4	3068.22	-0.038277	0.014566	0	4	3755.66	-0.167668	-0.04574	0
16.279	0.127128	-0.084833	0	4	3661.37	-0.031618	0.072849	0	4	4713.75	0.052324	-0.103543	0	4	5486.02	0.025074	-0.225569	0	4	6153.36	0.279237	-0.099114	0	4	6826.67	-0.031981	-0.369535	0	4		979.144	-0.120824	0.023643	0	4	2401.76	-0.196419	-0.05062	0	4	3068.26	-0.114735	-0.003708	0	4	3755.7	-0.048026	0.203666	0
16.319	-0.071308	0.147781	0	4	3661.41	-0.01839	-0.006075	0	4	4713.79	-0.056562	-0.135816	0	4	5486.06	0.064116	-0.060647	0	4	6153.4	0.092943	-0.128981	0	4	6826.71	-0.12041	-0.321485	0	4		979.184	-0.082474	-0.035207	0	4	2401.8	-0.186007	0.002348	0	4	3068.31	-0.238258	0.112955	0	4	3755.74	-0.032211	-0.02554	0
16.359	0.138126	-0.092353	0	4	3661.45	-0.134518	0.233116	0	4	4713.83	-0.002128	0.001237	0	4	5486.1	0.080976	0.038422	0	4	6153.44	0.037888	-0.052382	0	4	6826.75	-0.000331	-0.182277	0	4		979.224	-0.001861	-0.040142	0	4	2401.84	-0.10382	-0.110836	0	4	3068.34	-0.061784	0.237265	0	4	3755.77	-0.192468	-0.031429	0
16.399	0.139023	0.150821	0	4	3661.49	0.002412	0.256093	0	4	4713.87	-0.029139	-0.177085	0	4	5486.14	-0.128824	-0.06564	0	4	6153.48	0.094383	0.037932	0	4	6826.79	-0.083449	-0.307779	0	4		979.264	-0.127779	0.050759	0	4	2401.88	-0.223188	-0.311773	0	4	3068.39	5.73486e-05	0.084867	0	4	3755.81	0.023991	-0.012601	0
16.439	0.102466	-0.058686	0	4	3661.53	-0.069421	0.175548	0	4	4713.91	0.003846	-0.342171	0	4	5486.18	-0.076497	-0.128323	0	4	6153.52	0.262013	0.024616	0	4	6826.83	-0.132753	-0.082564	0	4		979.304	0.003371	0.021504	0	4	2401.92	-0.370886	-0.461066	0	4	3068.42	-0.034556	0.113906	0	4	3755.85	-0.205512	-0.206993	0
16.479	0.175351	-0.023071	0	4	3661.57	-0.09922	0.081011	0	4	4713.95	-0.01485	-0.122351	0	4	5486.22	-0.111836	-0.184597	0	4	6153.56	0.034766	-0.018058	0	4	6826.87	0.08162	0.011532	0	4		979.344	0.077994	-0.074299	0	4	2401.96	-0.362233	-0.206001	0	4	3068.46	0.055673	-0.024551	0	4	3755.89	0.022194	-0.037194	0
16.519	0.202208	-0.17372	0	4	3661.61	-0.075515	0.239688	0	4	4713.99	-0.006904	-0.241591	0	4	5486.26	0.062312	-0.083904	0	4	6153.6	0.128072	-0.239826	0	4	6826.91	-0.058435	0.037996	0	4		979.384	-0.102731	0.014495	0	4	2402	-0.313723	-0.362313	0	4	3068.5	-0.120439	0.042674	0	4	3755.93	-0.128786	-0.030575	0
16.559	0.276236	0.160683	0	4	3661.65	-0.033782	0.266526	0	4	4714.03	0.062625	0.097169	0	4	5486.3	0.071412	0.079291	0	4	6153.65	0.139051	-0.167705	0	4	6826.95	-0.035015	-0.07798	0	4		979.424	0.123389	-0.121301	0	4	2402.04	-0.39654	-0.366255	0	4	3068.54	0.035461	-0.014975	0	4	3755.97	-0.121318	0.029229	0
16.599	0.064144	0.122305	0	4	3661.69	0.042585	0.232727	0	4	4714.07	-0.063431	-0.216396	0	4	5486.34	-0.010559	-0.03187	0	4	6153.69	0.28183	0.000831	0	4	6826.99	-0.155386	0.044703	0	4		979.464	-0.003508	-0.055751	0	4	2402.08	-0.246268	-0.223656	0	4	3068.58	-0.197623	0.20056	0	4	3756.01	-0.109236	0.069605	0
16.639	0.022838	-0.008462	0	4	3661.73	0.004158	0.202339	0	4	4714.11	0.03396	0.072408	0	4	5486.38	-0.01203	-0.091905	0	4	6153.73	0.10749	0.054965	0	4	6827.03	-0.017431	0.059504	0	4		979.504	-0.020101	0.012601	0	4	2402.12	-0.18033	-0.239874	0	4	3068.62	-0.225584	-0.018641	0	4	3756.05	-0.099927	0.096901	0
16.679	0.066671	0.038538	0	4	3661.77	-0.13388	0.309354	0	4	4714.15	-0.110052	-0.177207	0	4	5486.42	0.10296	0.116676	0	4	6153.77	0.140523	-0.206223	0	4	6827.07	0.072884	-0.018493	0	4		979.544	-0.03584	0.028037	0	4	2402.16	-0.151713	0.020061	0	4	3068.66	-0.114761	0.031831	0	4	3756.09	-0.235582	0.170076	0
16.719	0.056386	0.009096	0	4	3661.81	-0.005674	0.267016	0	4	4714.19	0.019702	-0.060316	0	4	5486.46	0.140402	-0.154015	0	4	6153.81	0.104553	-0.215326	0	4	6827.11	0.054899	-0.235449	0	4		979.584	0.041106	-0.091029	0	4	2402.2	-0.20367	-0.30976	0	4	3068.7	-0.235907	0.155197	0	4	3756.13	-0.127537	0.102902	0
16.759	0.005399	0.212835	0	4	3661.85	-0.00591	0.124535	0	4	4714.23	0.146953	0.089783	0	4	5486.5	0.118724	0.182219	0	4	6153.85	0.051811	-0.153223	0	4	6827.15	0.049368	-0.034221	0	4		979.624	-0.045802	-0.022322	0	4	2402.24	-0.226291	-0.21732	0	4	3068.74	-0.118489	-0.01942	0	4	3756.17	-0.135833	0.003298	0
16.799	0.045307	0.087009	0	4	3661.89	-0.107675	0.026703	0	4	4714.27	0.022882	-0.024896	0	4	5486.54	-0.014439	-0.057658	0	4	6153.88	0.177749	-0.211892	0	4	6827.19	0.096515	0.0022	0	4		979.664	-0.078383	0.007473	0	4	2402.28	-0.34376	-0.300734	0	4	3068.78	-0.050441	0.119488	0	4	3756.21	-0.153255	0.087135	0
16.839	-0.013816	0.110953	0	4	3661.93	-0.189139	0.089193	0	4	4714.31	-0.100198	-0.258496	0	4	5486.58	0.04758	0.05905	0	4	6153.93	0.037449	-0.139694	0	4	6827.23	-0.006528	-0.160999	0	4		979.704	-0.088275	0.049019	0	4	2402.32	-0.39041	-0.338947	0	4	3068.82	-0.134642	0.0841	0	4	3756.25	-0.076522	0.094266	0
16.877	-0.011798	0.027819	0	4	3661.97	-0.091188	0.147866	0	4	4714.35	0.126358	0.192086	0	4	5486.62	0.006748	-0.023695	0	4	6153.96	0.171791	0.038235	0	4	6827.27	0.064285	-0.089151	0	4		979.744	0.015809	-0.015945	0	4	2402.36	-0.206614	-0.048536	0	4	3068.86	-0.013999	-0.026561	0	4	3756.29	-0.027719	0.114228	0
16.919	0.097963	-0.095482	0	4	3662.01	-0.128595	0.19761	0	4	4714.39	-0.051047	0.091393	0	4	5486.66	0.14722	-0.130159	0	4	6154	0.298124	-0.063128	0	4	6827.31	-0.102472	-0.17963	0	4		979.784	-0.153242	0.053406	0	4	2402.4	-0.095919	-0.122619	0	4	3068.9	0.043986	0.037555	0	4	3756.33	-0.14947	0.03291	0
16.957	0.059666	-0.092007	0	4	3662.05	-0.100331	0.194292	0	4	4714.43	-0.051483	-0.284187	0	4	5486.7	0.102393	0.132775	0	4	6154.04	0.018798	-0.032585	0	4	6827.35	0.088027	-0.254131	0	4		979.824	0.074936	-0.034672	0	4	2402.44	-0.233836	-0.021797	0	4	3068.94	-0.042005	0.000783	0	4	3756.37	-0.079383	0.093719	0
16.997	0.040463	-0.043265	0	4	3662.09	-0.078845	0.118747	0	4	4714.47	0.141081	0.096895	0	4	5486.74	-0.044452	-0.104513	0	4	6154.08	-0.061752	-0.08373	0	4	6827.39	-0.081502	-0.208291	0	4		979.864	-0.016975	-0.043769	0	4	2402.48	-0.227591	-0.244426	0	4	3068.98	0.036512	0.023421	0	4	3756.41	-0.052015	0.078654	0
17.037	0.067753	-0.052355	0	4	3662.13	-0.165951	0.146552	0	4	4714.52	0.076975	-0.12105	0	4	5486.78	-0.052296	-0.139849	0	4	6154.12	0.159302	-0.150188	0	4	6827.43	0.009526	-0.164613	0	4		979.904	-0.091974	0.073809	0	4	2402.52	-0.209074	-0.213947	0	4	3069.02	-0.135241	0.207557	0	4	3756.45	-0.182171	0.109879	0
17.077	-0.008886	0.120635	0	4	3662.17	-0.093399	-0.072952	0	4	4714.55	-0.001861	-0.022426	0	4	5486.82	0.014267	-0.08009	0	4	6154.16	0.211814	-0.02173	0	4	6827.47	0.080658	-0.099314	0	4		979.944	0.129748	0.277771	0	4	2402.56	-0.148883	-0.172579	0	4	3069.06	-0.032918	0.006194	0	4	3756.49	-0.158085	0.086387	0
17.117	0.181206	0.071042	0	4	3662.21	-0.099834	0.122516	0	4	4714.6	-0.053169	-0.145949	0	4	5486.86	0.02747	-0.062445	0	4	6154.2	0.274987	-0.066665	0	4	6827.51	-0.076595	-0.173596	0	4		979.984	-0.109096	0.123356	0	4	2402.6	-0.234256	-0.045985	0	4	3069.11	-0.090541	0.039153	0	4	3756.53	-0.052296	-0.040335	0
17.159	0.056345	-0.120926	0	4	3662.25	-0.05523	0.275162	0	4	4714.64	-0.035811	-0.165115	0	4	5486.9	0.000905	-0.066503	0	4	6154.24	0.287897	-0.111593	0	4	6827.55	-0.302221	-0.208513	0	4		980.022	0.060423	0.017401	0	4	2402.64	-0.233734	-0.224365	0	4	3069.14	-0.056386	0.12958	0	4	3756.57	-0.116354	0.145862	0
17.199	0.0156	0.063429	0	4	3662.29	-0.063768	0.20439	0	4	4714.67	-0.068847	-0.167718	0	4	5486.94	0.13447	-0.149364	0	4	6154.28	0.114621	-0.003395	0	4	6827.59	-0.213965	-0.022013	0	4		980.062	-0.071539	0.014688	0	4	2402.68	-0.242929	-0.045544	0	4	3069.18	-0.066677	0.074711	0	4	3756.61	0.012687	-0.127998	0
17.239	-0.052245	0.077784	0	4	3662.33	-0.17175	0.347612	0	4	4714.71	-0.02487	-0.018093	0	4	5486.98	-0.098812	0.069158	0	4	6154.32	0.156422	-0.057124	0	4	6827.63	-0.329595	0.00383	0	4		980.102	0.212321	0.020029	0	4	2402.72	-0.26337	-0.279642	0	4	3069.22	0.048109	0.084957	0	4	3756.65	-0.153758	0.057845	0
17.279	-0.026541	-0.009349	0	4	3662.37	0.006818	0.250501	0	4	4714.75	0.026728	-0.31741	0	4	5487.02	-0.007984	0.01407	0	4	6154.36	0.0574	0.102374	0	4	6827.67	-0.238835	0.004664	0	4		980.142	-0.041103	-0.0023	0	4	2402.76	-0.217727	-0.226803	0	4	3069.26	-0.206532	-0.052047	0	4	3756.69	-0.169784	0.115014	0
17.319	0.215836	0.036702	0	4	3662.41	-0.057279	0.247463	0	4	4714.79	0.127343	0.137855	0	4	5487.06	-0.015344	-0.082293	0	4	6154.4	0.291624	0.05128	0	4	6827.71	-0.178141	-0.174656	0	4		980.182	0.106535	-0.087441	0	4	2402.8	-0.251436	-0.364671	0	4	3069.3	-0.052155	0.01722	0	4	3756.73	-0.135094	-0.153381	0
17.359	0.172994	-0.095431	0	4	3662.45	-0.159432	0.279507	0	4	4714.83	0.069758	0.206023	0	4	5487.1	-0.117558	-0.098889	0	4	6154.44	0.15149	-0.026871	0	4	6827.75	0.05393	-0.194482	0	4		980.222	-0.092268	-0.013993	0	4	2402.84	-0.284201	-0.375613	0	4	3069.34	-0.141893	0.0356	0	4	3756.77	0.041055	0.039349	0
17.399	0.090095	0.12383	0	4	3662.49	-0.071931	0.073703	0	4	4714.87	-0.037799	0.010533	0	4	5487.14	0.026935	-0.127724	0	4	6154.48	0.251958	-0.008091	0	4	6827.79	-0.088209	0.016888	0	4		980.262	0.076602	-0.081127	0	4	2402.88	-0.18783	-0.290826	0	4	3069.38	-0.124294	0.044204	0	4	3756.81	-0.039723	0.045415	0
17.439	-0.064301	0.012717	0	4	3662.53	-0.132351	0.046832	0	4	4714.91	0.057173	-0.233017	0	4	5487.18	0.206684	-0.051493	0	4	6154.52	0.242323	0.032301	0	4	6827.83	0.107478	-0.081185	0	4		980.302	-0.104696	0.002757	0	4	2402.91	-0.113671	0.059105	0	4	3069.42	-0.041489	0.07377	0	4	3756.85	-0.118011	0.052504	0
17.479	0.11825	0.148808	0	4	3662.57	0.058782	0.162235	0	4	4714.95	0.006668	-0.198319	0	4	5487.22	0.323937	-0.003363	0	4	6154.56	0.056112	0.045218	0	4	6827.87	0.052898	-0.23119	0	4		980.342	0.055109	-0.120947	0	4	2402.96	-0.150814	-0.032984	0	4	3069.46	0.047058	0.074936	0	4	3756.89	-0.129283	0.092311	0
17.519	0.073213	0.033619	0	4	3662.61	-0.122586	0.032978	0	4	4714.99	-0.004773	-0.108526	0	4	5487.26	0.039169	0.134617	0	4	6154.6	-0.128384	0.001636	0	4	6827.91	-0.063504	-0.05963	0	4		980.382	-0.082203	0.00411	0	4	2402.99	-0.238315	-0.04583	0	4	3069.5	-0.060993	-0.077191	0	4	3756.93	-0.079198	0.080129	0
17.559	0.082416	-0.02683	0	4	3662.65	-0.042792	0.197449	0	4	4715.03	0.066327	0.050771	0	4	5487.3	0.180081	-0.023585	0	4	6154.65	0.131749	-0.11214	0	4	6827.95	0.020846	-0.229934	0	4		980.422	-0.069765	-0.004651	0	4	2403.03	-0.412203	-0.243646	0	4	3069.54	-0.097824	0.114199	0	4	3756.97	-0.117374	0.3198	0
17.599	0.086668	0.104653	0	4	3662.69	-0.101332	0.0068	0	4	4715.07	-0.032348	-0.198963	0	4	5487.34	0.073795	-0.028636	0	4	6154.69	0.125562	0.083724	0	4	6827.99	-0.462453	-0.138354	0	4		980.462	0.151072	-0.163943	0	4	2403.08	-0.217262	-0.405312	0	4	3069.58	-0.172855	-0.008162	0	4	3757.01	-0.129608	0.153625	0
17.639	0.104746	0.047995	0	4	3662.73	-0.031774	-0.018293	0	4	4715.11	-0.013576	-0.178129	0	4	5487.38	0.19401	-0.043756	0	4	6154.73	-0.035888	-0.003253	0	4	6828.03	-0.440823	-0.179285	0	4		980.502	0.045468	-0.167016	0	4	2403.11	-0.276886	-0.142116	0	4	3069.62	-0.066238	-0.031464	0	4	3757.05	0.030847	0.035329	0
17.679	0.064114	0.009079	0	4	3662.77	-0.073113	-0.109596	0	4	4715.15	-0.006241	0.039514	0	4	5487.42	0.120572	0.08288	0	4	6154.77	0.176302	-0.038151	0	4	6828.07	-0.24543	-0.220496	0	4		980.543	-0.138937	0.073371	0	4	2403.16	-0.258171	-0.298757	0	4	3069.66	-0.0023	0.02401	0	4	3757.09	-0.000408	0.125218	0
17.719	-0.059434	0.051601	0	4	3662.81	-0.135499	0.002345	0	4	4715.19	-0.037895	-0.102915	0	4	5487.46	0.015236	-0.05436	0	4	6154.81	0.138032	-0.056215	0	4	6828.11	-0.123854	-0.168755	0	4		980.584	0.010762	0.253658	0	4	2403.2	-0.351069	-0.023141	0	4	3069.7	0.034518	0.127444	0	4	3757.13	-0.030229	-0.110697	0
17.759	0.053736	0.024046	0	4	3662.85	0.013598	0.150127	0	4	4715.23	0.107185	0.044458	0	4	5487.5	0.029152	-0.17349	0	4	6154.85	0.109045	-0.073803	0	4	6828.15	0.06612	-0.157162	0	4		980.624	0.071482	-0.062451	0	4	2403.24	-0.238233	-0.167508	0	4	3069.74	-0.063963	-0.029428	0	4	3757.17	-0.165018	-0.011325	0
17.799	-0.012639	0.07977	0	4	3662.89	-0.153315	0.222902	0	4	4715.27	0.022892	0.038261	0	4	5487.54	0.170676	-0.058496	0	4	6154.89	0.115207	-0.10544	0	4	6828.19	-0.161268	-0.17262	0	4		980.664	-0.041011	-0.025273	0	4	2403.28	-0.32121	-0.129309	0	4	3069.78	-0.056501	0.124606	0	4	3757.21	-0.050033	-0.070559	0
17.839	0.100005	-0.023598	0	4	3662.93	0.036665	0.302944	0	4	4715.31	-0.052958	-0.270736	0	4	5487.58	0.018855	-0.102645	0	4	6154.93	0.005901	-0.134231	0	4	6828.23	-0.196037	-0.227666	0	4		980.704	0.020464	-0.023128	0	4	2403.32	-0.233963	-0.229457	0	4	3069.82	-0.072355	0.027747	0	4	3757.25	-0.084774	-0.007441	0
17.879	0.116483	0.055527	0	4	3662.97	0.03403	0.375126	0	4	4715.35	0.049199	0.068623	0	4	5487.62	0.045841	-0.139572	0	4	6154.97	0.316654	-0.065125	0	4	6828.27	-0.073234	-0.243018	0	4		980.744	-0.114433	0.087595	0	4	2403.36	-0.219887	-0.377198	0	4	3069.86	-0.186052	0.224964	0	4	3757.29	-0.089706	0.046813	0
17.919	0.065182	-0.073608	0	4	3663.01	-0.006436	0.3068	0	4	4715.39	-0.058814	-0.158186	0	4	5487.66	0.175047	0.088697	0	4	6155.01	0.118705	-0.191503	0	4	6828.31	-0.067295	-0.32421	0	4		980.784	0.060235	0.116547	0	4	2403.4	-0.200319	-0.264944	0	4	3069.9	-0.00592	-0.003134	0	4	3757.33	-0.020034	0.138199	0
17.959	0.10877	0.128454	0	4	3663.05	-0.069688	0.111184	0	4	4715.43	0.176809	-0.094927	0	4	5487.7	-0.135859	-0.233358	0	4	6155.05	0.2845	-0.062335	0	4	6828.35	-0.192503	-0.266136	0	4		980.824	0.003868	-0.021195	0	4	2403.44	-0.231612	-0.205128	0	4	3069.94	-0.007895	0.075693	0	4	3757.37	-0.170109	0.126925	0
17.999	0.008884	0.039679	0	4	3663.09	-0.033829	0.092765	0	4	4715.47	0.147539	-0.17732	0	4	5487.74	0.058508	-0.077719	0	4	6155.09	0.161417	-0.054398	0	4	6828.39	0.027785	-0.302016	0	4		980.864	-0.114592	0.067695	0	4	2403.48	-0.094479	-0.424841	0	4	3069.98	-0.126435	0.218615	0	4	3757.41	-0.046854	0.027077	0
18.039	0.081672	-0.011999	0	4	3663.13	-0.049616	0.137239	0	4	4715.51	0.132262	-0.032379	0	4	5487.78	0.245783	-0.115928	0	4	6155.12	0.029936	0.058683	0	4	6828.43	-0.029085	-0.139929	0	4		980.904	0.008268	0.087963	0	4	2403.52	-0.360838	-0.436354	0	4	3070.02	-0.078026	0.057813	0	4	3757.45	-0.2264	0.162812	0
18.079	0.181773	-0.14076	0	4	3663.17	-0.080005	0.126313	0	4	4715.55	0.082257	0.040738	0	4	5487.82	0.351751	0.285353	0	4	6155.16	0.320362	-0.024081	0	4	6828.47	0.059764	0.054015	0	4		980.944	-0.036522	0.07062	0	4	2403.56	-0.16043	-0.235033	0	4	3070.06	0.044229	0.017297	0	4	3757.49	-0.080103	0.062967	0
18.119	0.126882	0.115716	0	4	3663.21	-0.123048	-0.046117	0	4	4715.59	-0.000376	0.007872	0	4	5487.86	0.12056	0.103927	0	4	6155.2	0.055157	-0.033745	0	4	6828.51	0.014965	-0.017004	0	4		980.984	-0.074576	0.029815	0	4	2403.6	0.002275	-0.155062	0	4	3070.1	-0.116182	0.069357	0	4	3757.53	-0.196731	0.045953	0
18.159	0.067619	0.094746	0	4	3663.25	0.062956	0.078145	0	4	4715.63	-0.070074	-0.283724	0	4	5487.9	0.152133	-0.157127	0	4	6155.24	0.253373	-0.038647	0	4	6828.55	-0.265887	-0.133996	0	4		981.024	0.00613	0.025563	0	4	2403.64	-0.145908	-0.307744	0	4	3070.14	-0.050855	-0.041176	0	4	3757.57	-0.061433	0.075858	0
18.199	0.020744	0.231034	0	4	3663.29	-0.057336	0.093867	0	4	4715.67	0.263922	-0.056206	0	4	5487.94	0.164763	0.246751	0	4	6155.28	0.069793	-0.004613	0	4	6828.59	-0.289687	-0.147473	0	4		981.064	-0.043859	-0.005933	0	4	2403.68	-0.217842	-0.079601	0	4	3070.18	-0.134049	0.040196	0	4	3757.61	-0.15068	0.002983	0
18.239	0.118933	0.147967	0	4	3663.33	-0.057549	0.188236	0	4	4715.71	0.0447	-0.012608	0	4	5487.98	-0.017886	-0.045766	0	4	6155.32	0.17657	-0.083756	0	4	6828.63	-0.21622	-0.110333	0	4		981.104	-0.041696	-0.011145	0	4	2403.72	-0.215898	-0.188861	0	4	3070.22	-0.096766	0.069931	0	4	3757.65	-0.079281	0.048188	0
18.279	0.114334	0.131134	0	4	3663.37	-0.073754	0.263369	0	4	4715.75	0.018874	-0.09226	0	4	5488.02	0.061745	-0.104835	0	4	6155.36	0.220805	-0.031921	0	4	6828.67	0.054086	-0.117645	0	4		981.144	-0.012951	-0.012382	0	4	2403.76	-0.127288	-0.026024	0	4	3070.26	-0.255507	0.006732	0	4	3757.69	-0.173645	0.078199	0
18.317	0.087315	-0.122393	0	4	3663.41	-0.094985	0.287418	0	4	4715.79	0.117045	-0.160248	0	4	5488.06	0.050065	0.33282	0	4	6155.4	0.015643	0.077326	0	4	6828.71	0.23201	0.069973	0	4		981.184	-0.010622	-0.016763	0	4	2403.8	-0.158416	-0.173065	0	4	3070.3	-0.031319	0.076238	0	4	3757.73	-0.109778	0.063956	0
18.359	0.017165	0.109019	0	4	3663.45	-0.038749	0.266458	0	4	4715.83	0.060758	-0.024245	0	4	5488.1	0.050435	-0.152643	0	4	6155.44	0.249033	-0.078892	0	4	6828.75	-0.057604	-0.110359	0	4		981.224	0.05811	-0.09923	0	4	2403.84	-0.098646	-0.187918	0	4	3070.34	0.03381	0.130765	0	4	3757.77	-0.091694	0.073519	0
18.397	0.063768	0.13336	0	4	3663.49	-0.061806	0.358995	0	4	4715.87	0.052104	0.055471	0	4	5488.14	0.080511	0.098483	0	4	6155.48	0.074101	0.038518	0	4	6828.79	-0.002957	-0.568333	0	4		981.264	-0.138653	0.043556	0	4	2403.88	-0.153777	-0.204158	0	4	3070.39	-0.116437	0.063521	0	4	3757.81	-0.081078	0.028265	0
18.437	-0.003904	0.002691	0	4	3663.53	-0.153987	0.310404	0	4	4715.91	0.005324	-0.092005	0	4	5488.18	-0.05401	-0.13829	0	4	6155.52	0.10057	-0.024597	0	4	6828.83	0.072027	-0.341601	0	4		981.304	0.0972	0.004845	0	4	2403.92	-0.2284	-0.111751	0	4	3070.42	-0.12372	0.159565	0	4	3757.85	-0.029044	0.022847	0
18.477	-0.003022	0.205365	0	4	3663.57	-0.00484	0.299043	0	4	4715.95	-0.054475	-0.33665	0	4	5488.22	0.053098	-0.126474	0	4	6155.56	0.232415	-0.166326	0	4	6828.87	0.061092	-0.09281	0	4		981.342	-0.053659	0.007666	0	4	2403.96	-0.209475	-0.269235	0	4	3070.46	-0.060216	0.083708	0	4	3757.89	-0.160187	0.172823	0
18.519	-0.016046	0.176378	0	4	3663.61	-0.012126	0.23704	0	4	4715.99	-0.017676	0.178734	0	4	5488.26	0.124351	0.041282	0	4	6155.6	0.174952	-0.093368	0	4	6828.91	-0.234072	-0.236737	0	4		981.384	-0.035298	-0.020254	0	4	2404	-0.207736	-0.322464	0	4	3070.5	-0.036372	-0.02642	0	4	3757.93	-0.182197	0.115239	0
18.557	0.04759	0.238604	0	4	3663.65	-0.044477	0.285544	0	4	4716.03	-0.046695	-0.118406	0	4	5488.3	0.046376	0.079182	0	4	6155.64	0.034632	0.004664	0	4	6828.95	-0.151219	0.133674	0	4		981.422	-0.102402	0.06707	0	4	2404.04	-0.073464	-0.331222	0	4	3070.54	-0.056584	-0.099317	0	4	3757.97	-0.031688	0.049673	0
18.6	0.079488	-0.012682	0	4	3663.69	-0.028923	0.408723	0	4	4716.07	0.164071	0.113622	0	4	5488.34	0.051907	-0.125025	0	4	6155.68	0.17694	-0.072952	0	4	6828.99	-0.119731	-0.013168	0	4		981.462	-0.094342	-0.032166	0	4	2404.08	-0.226381	-0.166378	0	4	3070.58	-0.034454	0.018396	0	4	3758.01	-0.021028	0.102683	0
18.639	0.08523	-0.003228	0	4	3663.73	-0.081649	0.28229	0	4	4716.11	-0.038216	-0.006233	0	4	5488.38	0.134623	0.051673	0	4	6155.72	0.218562	-0.073087	0	4	6829.03	0.007971	-0.040712	0	4		981.502	0.009749	0.0603	0	4	2404.12	-0.181923	-0.290839	0	4	3070.62	-0.125893	0.043662	0	4	3758.05	-0.022863	0.089792	0
18.679	0.142503	0.070741	0	4	3663.77	-0.056759	0.322045	0	4	4716.15	0.004311	-0.029944	0	4	5488.42	0.219792	0.072926	0	4	6155.76	0.032854	-0.014051	0	4	6829.07	-0.129809	-0.000528	0	4		981.544	0.046969	-0.068191	0	4	2404.16	-0.220461	-0.087421	0	4	3070.66	-0.08984	0.009164	0	4	3758.09	-0.147265	0.065988	0
18.719	0.20278	0.228605	0	4	3663.81	0.029707	0.22154	0	4	4716.19	0.253401	-0.083318	0	4	5488.46	0.040603	-0.171873	0	4	6155.8	0.02863	-0.109287	0	4	6829.11	0.056186	0.068298	0	4		981.582	-0.083796	0.008433	0	4	2404.2	-0.210826	-0.206552	0	4	3070.7	-0.076624	-0.016676	0	4	3758.13	-0.113812	0.097159	0
18.759	0.17613	0.013996	0	4	3663.85	-0.028037	0.483253	0	4	4716.23	0.057999	0.055497	0	4	5488.5	0.09697	0.272675	0	4	6155.84	0.074273	-0.107302	0	4	6829.15	-0.055552	-0.044787	0	4		981.622	-0.007733	-0.112359	0	4	2404.24	-0.202638	-0.294701	0	4	3070.74	-0.219155	0.048079	0	4	3758.17	0.037404	0.012324	0
18.799	0.120751	-0.085919	0	4	3663.89	-0.018447	0.446094	0	4	4716.27	-0.101714	-0.235899	0	4	5488.54	0.027871	-0.097536	0	4	6155.88	0.187065	-0.187818	0	4	6829.19	0.21205	-0.045798	0	4		981.662	-0.115172	0.034601	0	4	2404.28	-0.102061	-0.319079	0	4	3070.78	-0.232587	-0.017922	0	4	3758.21	-0.018664	0.09664	0
18.839	-0.041062	0.145531	0	4	3663.93	-0.010667	0.448884	0	4	4716.31	0.072065	-0.310594	0	4	5488.58	0.091465	-0.052807	0	4	6155.92	0.045184	-0.106246	0	4	6829.23	-0.031427	0.003118	0	4		981.702	-0.06409	-0.007112	0	4	2404.32	-0.159639	-0.221292	0	4	3070.82	0.015981	-0.050926	0	4	3758.25	-0.17894	0.108993	0
18.879	0.060387	0.010158	0	4	3663.97	0.054491	0.477439	0	4	4716.35	0.021541	0.022802	0	4	5488.62	0.235818	0.058193	0	4	6155.96	0.038035	-0.04487	0	4	6829.27	-0.121165	-0.060883	0	4		981.742	-0.069347	0.02477	0	4	2404.36	-0.276937	-0.150201	0	4	3070.86	-0.038213	0.068819	0	4	3758.29	-0.163189	0.117742	0
18.919	0.065134	0.038217	0	4	3664.01	-0.003326	0.395197	0	4	4716.39	-0.032947	-0.100924	0	4	5488.66	0.188836	0.092388	0	4	6156	0.106847	-0.039671	0	4	6829.31	0.146832	-0.134408	0	4		981.782	-0.136869	0.058547	0	4	2404.4	-0.236111	-0.223756	0	4	3070.9	-0.047255	-0.057864	0	4	3758.33	-0.105987	0.077188	0
18.959	0.012161	0.095777	0	4	3664.05	0.003881	0.396698	0	4	4716.43	0.087565	0.037359	0	4	5488.7	0.147679	-0.152095	0	4	6156.04	0.170134	-0.072095	0	4	6829.35	0.021687	-0.302822	0	4		981.822	0.096629	-0.017149	0	4	2404.43	-0.095441	-0.153741	0	4	3070.94	0.09344	0.191912	0	4	3758.37	-0.035754	0.127141	0
18.999	0.12726	0.031007	0	4	3664.09	-0.029343	0.307141	0	4	4716.47	0.229802	0.002957	0	4	5488.74	0.014152	0.151574	0	4	6156.09	0.188957	-0.094843	0	4	6829.39	0.140988	-0.162113	0	4		981.862	0.037716	-0.135281	0	4	2404.47	-0.293192	-0.159298	0	4	3070.98	-0.104445	0.108765	0	4	3758.41	-0.077179	0.132459	0
19.039	0.074614	0.033506	0	4	3664.13	-0.086813	0.274005	0	4	4716.51	0.017064	0.081788	0	4	5488.78	0.041234	0.00469	0	4	6156.12	0.269207	0.078357	0	4	6829.43	0.138277	-0.011686	0	4		981.904	-0.084312	0.019823	0	4	2404.51	-0.156237	-0.256119	0	4	3071.02	-0.087724	0.06096	0	4	3758.45	-0.142193	-0.017133	0
19.079	0.040378	-0.0247	0	4	3664.17	0.018511	0.318331	0	4	4716.55	-0.029009	-0.112057	0	4	5488.82	0.024685	-0.133033	0	4	6156.16	0.169612	-0.010501	0	4	6829.47	-0.039277	-0.051071	0	4		981.942	0.054433	-0.04449	0	4	2404.55	-0.262829	-0.163231	0	4	3071.06	0.003148	0.005392	0	4	3758.49	-0.06265	0.016669	0
19.119	0.138976	-0.058905	0	4	3664.21	-0.043645	0.326858	0	4	4716.59	0.047016	0.059275	0	4	5488.86	0.083837	-0.023437	0	4	6156.2	0.337994	-0.110794	0	4	6829.51	0.004741	-0.203292	0	4		981.984	-0.059184	0.003807	0	4	2404.59	-0.156919	-0.143402	0	4	3071.1	-0.025087	0.12489	0	4	3758.53	-0.122936	0.039394	0
19.159	0.109759	0.054138	0	4	3664.25	-0.03461	0.147889	0	4	4716.63	0.131045	-0.032894	0	4	5488.9	0.244598	-0.024848	0	4	6156.24	0.14464	-0.005354	0	4	6829.55	0.100306	-0.010395	0	4		982.024	-0.07851	0.043009	0	4	2404.64	-0.186581	0.077053	0	4	3071.14	0.017816	0.258019	0	4	3758.57	-0.086966	-0.002828	0
19.199	0.282487	-0.190815	0	4	3664.29	0.003686	0.016025	0	4	4716.67	0.223797	-0.112723	0	4	5488.94	0.016268	0.050559	0	4	6156.28	0.274451	-0.154524	0	4	6829.59	0.067139	-0.063128	0	4		982.064	-0.079234	0.008311	0	4	2404.68	-0.207978	-0.063472	0	4	3071.18	-0.045121	0.138602	0	4	3758.61	-0.176901	0.011303	0
19.239	-0.213514	-0.067457	0	4	3664.33	-0.029793	0.249364	0	4	4716.71	0.073903	0.032292	0	4	5488.98	-0.008303	-0.036044	0	4	6156.32	0.154618	0.016086	0	4	6829.63	0.034699	-0.131287	0	4		982.104	0.043419	0.033893	0	4	2404.72	-0.164559	-0.070636	0	4	3071.22	-0.057967	-0.052028	0	4	3758.65	-0.059254	0.085173	0
19.279	0.035089	-0.093277	0	4	3664.37	0.11161	0.409712	0	4	4716.75	0.035862	0.018225	0	4	5489.02	0.294415	-0.01731	0	4	6156.36	0.148832	0.011596	0	4	6829.67	0.112426	-0.131603	0	4		982.144	-0.094119	0.001121	0	4	2404.76	-0.215529	-0.225228	0	4	3071.26	-0.128333	0.168877	0	4	3758.69	-0.018485	0.012466	0
19.319	0.063834	0.178588	0	4	3664.41	-0.085523	0.193542	0	4	4716.79	-0.009099	-0.2019	0	4	5489.06	0.057336	0.09693	0	4	6156.4	0.431561	-0.044812	0	4	6829.71	-0.118215	-0.047283	0	4		982.184	0.026412	0.034324	0	4	2404.8	-0.135285	-0.348066	0	4	3071.3	-0.065409	-0.040924	0	4	3758.73	-0.16561	0.177723	0
19.359	0.117625	0.072521	0	4	3664.45	-0.087071	0.192157	0	4	4716.83	-0.010441	-0.061991	0	4	5489.1	-0.049161	-0.150156	0	4	6156.44	0.234269	-0.191657	0	4	6829.75	-0.077825	-0.270101	0	4		982.224	-0.149995	0.079117	0	4	2404.84	-0.241737	-0.183356	0	4	3071.34	-0.126728	-0.004526	0	4	3758.77	0.048925	0.020486	0
19.399	0.128195	-0.027165	0	4	3664.49	-0.00859	0.264677	0	4	4716.87	0.08285	0.123675	0	4	5489.14	0.221551	-0.11866	0	4	6156.48	0.231561	-0.016557	0	4	6829.79	-0.148326	-0.137533	0	4		982.264	0.034906	0.191561	0	4	2404.88	-0.253207	-0.264094	0	4	3071.39	-0.069704	-0.036292	0	4	3758.81	-0.138663	0.048104	0
19.439	0.227631	-0.145482	0	4	3664.53	-0.073346	0.24154	0	4	4716.91	0.058629	-0.009287	0	4	5489.18	0.003224	-0.081346	0	4	6156.52	0.04161	-0.016937	0	4	6829.83	-0.134594	-0.034994	0	4		982.304	-0.208625	0.131467	0	4	2404.92	-0.194743	-0.211812	0	4	3071.42	-0.078313	0.10173	0	4	3758.85	-0.255138	0.113087	0
19.479	0.154927	0.013685	0	4	3664.57	-0.037713	0.123279	0	4	4716.95	0.02459	0.022551	0	4	5489.22	0.123548	-0.003453	0	4	6156.56	0.18572	-0.114988	0	4	6829.87	-0.112212	-0.271902	0	4		982.344	0.076662	-0.12116	0	4	2404.96	-0.194195	-0.302851	0	4	3071.46	-0.053086	-0.059227	0	4	3758.89	-0.183598	-0.017787	0
19.519	0.072395	-0.021026	0	4	3664.61	-0.091853	0.108848	0	4	4716.99	0.051958	-0.00641	0	4	5489.26	-0.128843	-0.053329	0	4	6156.6	0.122573	0.007763	0	4	6829.91	-0.072983	-0.180751	0	4		982.384	-0.08249	-0.029287	0	4	2405	-0.271711	-0.181627	0	4	3071.5	0.020321	0.059456	0	4	3758.93	-0.032682	-0.062667	0
19.559	0.025866	0.048468	0	4	3664.65	-0.124972	0.236379	0	4	4717.03	0.054988	-0.044133	0	4	5489.3	0.120094	-0.128581	0	4	6156.65	0.126537	-0.23933	0	4	6829.95	-0.074276	0.011738	0	4		982.424	0.008542	-0.033435	0	4	2405.04	-0.250295	-0.227409	0	4	3071.54	-0.018262	0.061131	0	4	3758.97	-0.099971	0.056244	0
19.599	0.081207	-0.050664	0	4	3664.69	-0.077637	0.379388	0	4	4717.07	0.006305	-0.127202	0	4	5489.34	-0.003798	-0.116508	0	4	6156.68	0.288572	-0.008581	0	4	6829.99	-0.032883	-0.223823	0	4		982.464	-0.048182	-0.036457	0	4	2405.08	-0.236143	-0.204606	0	4	3071.58	-0.054539	0.111322	0	4	3759.01	-0.221028	0.238728	0
19.639	-0.023566	0.136262	0	4	3664.73	-0.078596	0.135143	0	4	4717.11	-0.044646	-0.146284	0	4	5489.38	-0.089031	-0.118885	0	4	6156.73	0.114105	-0.092414	0	4	6830.03	-0.071842	-0.1512	0	4		982.504	-0.031927	-0.036186	0	4	2405.12	-0.214235	-0.204307	0	4	3071.62	-0.129984	0.033268	0	4	3759.05	-0.170791	0.155864	0
19.677	-0.097472	0.122268	0	4	3664.77	-0.100245	-0.037581	0	4	4717.15	-0.113082	-0.144709	0	4	5489.42	0.025233	-0.262909	0	4	6156.76	-0.009909	-0.084793	0	4	6830.07	-0.240428	-0.154398	0	4		982.544	-0.060646	0.005689	0	4	2405.16	-0.214656	-0.341791	0	4	3071.66	-0.061777	0.075194	0	4	3759.09	-0.058604	-0.11043	0
19.719	-0.020717	-0.028575	0	4	3664.81	0.011846	0.194286	0	4	4717.19	0.018724	0.019037	0	4	5489.46	0.019339	-0.140577	0	4	6156.81	0.210348	-0.144242	0	4	6830.11	-0.270536	-0.108916	0	4		982.584	0.003062	0.006268	0	4	2405.2	-0.244528	-0.017929	0	4	3071.7	-0.009724	-0.001198	0	4	3759.13	-0.222997	0.010887	0
19.757	0.085107	0.10009	0	4	3664.85	-0.092969	0.033287	0	4	4717.23	-0.062121	-0.36125	0	4	5489.5	0.029885	-0.032417	0	4	6156.84	-0.037283	-0.144738	0	4	6830.15	-0.205197	-0.028774	0	4		982.624	-0.064332	-0.027599	0	4	2405.24	-0.229547	-0.266272	0	4	3071.74	-0.039653	0.08393	0	4	3759.17	-0.134839	0.091883	0
19.797	0.162937	0.032899	0	4	3664.89	-0.118501	0.069406	0	4	4717.27	0.038322	0.062893	0	4	5489.54	-0.098506	-0.24516	0	4	6156.89	0.390595	-0.097368	0	4	6830.19	-0.131029	-0.003363	0	4		982.664	-0.042511	-0.017909	0	4	2405.28	-0.253436	-0.419868	0	4	3071.78	-0.014031	0.086104	0	4	3759.21	-0.035766	0.028343	0
19.837	0.010359	-0.001364	0	4	3664.93	-0.094103	0.106391	0	4	4717.31	-0.049508	-0.294537	0	4	5489.58	0.006474	-0.202931	0	4	6156.93	0.267302	0.004954	0	4	6830.23	0.064046	-0.143579	0	4		982.704	-0.084258	-0.072746	0	4	2405.32	-0.392105	-0.277813	0	4	3071.82	0.090662	0.107122	0	4	3759.25	-0.103712	0.17398	0
19.877	0.067573	0.11009	0	4	3664.97	-0.151171	0.020474	0	4	4717.35	0.038111	0.053748	0	4	5489.62	-0.076089	-0.233899	0	4	6156.96	0.141823	-0.114118	0	4	6830.27	0.10973	-0.273577	0	4		982.744	-0.079629	0.071425	0	4	2405.36	-0.258795	-0.372308	0	4	3071.86	-0.182789	0.041981	0	4	3759.29	-0.238137	0.232395	0
19.919	0.22903	-0.098674	0	4	3665.01	0.079995	0.063869	0	4	4717.39	0.004014	-0.169834	0	4	5489.66	0.084583	-0.258837	0	4	6157.01	0.204397	-0.097729	0	4	6830.31	0.050075	-0.253104	0	4		982.784	0.072059	0.124175	0	4	2405.4	-0.233256	-0.053123	0	4	3071.9	-0.190047	0.155916	0	4	3759.33	-0.118756	0.063408	0
19.957	0.144404	-0.008462	0	4	3665.05	-0.100532	0.245524	0	4	4717.43	0.060391	0.02909	0	4	5489.7	0.014299	0.123891	0	4	6157.04	0.2323	-0.059076	0	4	6830.35	-0.008835	-0.363556	0	4		982.824	-0.123382	0.078718	0	4	2405.44	-0.261777	-0.192859	0	4	3071.94	-0.151407	0.144216	0	4	3759.37	0.016281	0.072079	0
19.997	0.192636	-0.096837	0	4	3665.09	-0.15394	0.133493	0	4	4717.47	-0.022742	-0.274234	0	4	5489.74	-0.036933	-0.018521	0	4	6157.08	0.160162	-0.01932	0	4	6830.39	-0.006637	-0.173906	0	4		982.864	0.073868	0.157906	0	4	2405.48	-0.376774	-0.360461	0	4	3071.98	-0.015917	0.044152	0	4	3759.41	-0.147724	0.111693	0
20.037	0.14579	0.09622	0	4	3665.13	-0.112868	0.040019	0	4	4717.51	-0.091076	0.307496	0	4	5489.78	0.086342	-0.045611	0	4	6157.12	0.393628	-0.058277	0	4	6830.43	0.119276	-0.262326	0	4		982.904	0.045274	0.194015	0	4	2405.52	-0.213789	-0.425914	0	4	3072.02	-0.030637	0.081305	0	4	3759.45	-0.157881	0.226761	0
20.079	0.077704	-0.026072	0	4	3665.17	0.120572	0.223939	0	4	4717.55	0.134052	-0.130304	0	4	5489.82	0.097021	0.044258	0	4	6157.16	0.021748	-0.093625	0	4	6830.47	0.150789	-0.222062	0	4		982.942	-0.106732	0.044181	0	4	2405.56	-0.138025	-0.55388	0	4	3072.06	-0.043655	-0.042609	0	4	3759.49	-0.159557	0.220999	0
20.119	0.145129	0.119399	0	4	3665.21	-0.080384	0.162912	0	4	4717.59	0.032689	0.19082	0	4	5489.86	-0.110989	0.011957	0	4	6157.2	-0.008507	-0.119427	0	4	6830.51	-0.092914	-0.266449	0	4		982.982	-0.101654	0.003202	0	4	2405.6	-0.257107	-0.19953	0	4	3072.1	0.005238	0.030575	0	4	3759.53	-0.12509	0.10574	0
20.159	0.067098	-0.011709	0	4	3665.25	-0.065103	0.127357	0	4	4717.63	0.021713	-0.118737	0	4	5489.9	0.227285	0.129889	0	4	6157.24	0.129442	-0.098625	0	4	6830.55	-0.127174	-0.208149	0	4		983.022	-0.016784	0.037855	0	4	2405.64	-0.251397	-0.370127	0	4	3072.14	-0.018269	0.089361	0	4	3759.57	-0.188479	0.084745	0
20.199	-0.010203	-0.072915	0	4	3665.29	-0.079441	0.083662	0	4	4717.67	0.059241	0.015123	0	4	5489.94	-0.001096	-0.190523	0	4	6157.28	-0.046357	-0.12652	0	4	6830.59	-0.282824	-0.333757	0	4		983.062	-0.026527	0.033596	0	4	2405.68	-0.206302	-0.260654	0	4	3072.18	-0.032383	0.117533	0	4	3759.61	-0.128843	0.05683	0
20.241	0.116276	0.256439	0	4	3665.33	-0.057256	0.135117	0	4	4717.71	-0.107452	-0.233587	0	4	5489.98	0.037716	-0.156199	0	4	6157.32	-0.023755	-0.090076	0	4	6830.63	-0.372301	-0.26383	0	4		983.102	-0.051158	0.027038	0	4	2405.72	-0.234416	-0.325157	0	4	3072.22	-0.170128	0.103592	0	4	3759.65	-0.092484	-0.054901	0
20.279	-0.015457	-0.034857	0	4	3665.37	-0.107876	0.007956	0	4	4717.75	0.087935	0.039404	0	4	5490.02	-0.044694	0.046887	0	4	6157.36	0.164023	-0.136505	0	4	6830.67	-0.198181	-0.093081	0	4		983.142	-0.041829	-0.058412	0	4	2405.76	-0.239265	-0.221069	0	4	3072.26	-0.083799	-0.10412	0	4	3759.69	-0.14831	-0.069357	0
20.319	0.042425	0.011536	0	4	3665.41	-0.168035	0.117616	0	4	4717.79	0.078673	-0.147376	0	4	5490.06	0.091152	-0.023559	0	4	6157.4	0.230395	-0.194034	0	4	6830.71	-0.088435	-0.019832	0	4		983.182	0.005509	-0.012376	0	4	2405.8	-0.147921	-0.407924	0	4	3072.3	-0.033562	0.053835	0	4	3759.73	-0.012438	0.036953	0
20.359	0.023419	-0.029462	0	4	3665.45	0.034537	0.209544	0	4	4717.83	0.02422	0.008646	0	4	5490.1	0.02243	-0.056544	0	4	6157.44	0.478237	-0.052073	0	4	6830.75	0.104238	-0.067177	0	4		983.222	0.08465	-0.155104	0	4	2405.84	-0.194393	-0.29053	0	4	3072.34	-0.080677	0.060457	0	4	3759.77	-0.119393	0.213445	0
20.399	-0.017923	0.060734	0	4	3665.49	-0.003393	0.496618	0	4	4717.87	-0.037082	-0.182648	0	4	5490.14	-0.114041	-0.265176	0	4	6157.48	0.201778	-0.254882	0	4	6830.79	-0.074149	-0.143405	0	4		983.262	-0.082047	-0.022174	0	4	2405.88	-0.384465	-0.167557	0	4	3072.39	-0.12604	-0.112891	0	4	3759.81	-0.151075	0.101234	0
20.439	-0.019057	-0.005421	0	4	3665.53	0.020591	0.363505	0	4	4717.91	0.003989	-0.007602	0	4	5490.18	0.023354	-0.259526	0	4	6157.52	0.09488	-0.076624	0	4	6830.83	0.009778	-0.089029	0	4		983.302	0.02357	-0.128884	0	4	2405.91	-0.26035	-0.350404	0	4	3072.42	-0.088508	0.04879	0	4	3759.85	-0.062516	0.004935	0
20.479	0.135327	0.190873	0	4	3665.57	-0.094587	0.286948	0	4	4717.95	0.212773	-0.054489	0	4	5490.22	-0.080594	-0.315413	0	4	6157.56	0.226642	-0.099469	0	4	6830.87	0.085121	-0.075107	0	4		983.342	-0.124147	0.065898	0	4	2405.95	-0.207035	-0.366855	0	4	3072.46	-0.198484	-0.056979	0	4	3759.89	-0.142613	0.059626	0
20.519	0.125436	0.094903	0	4	3665.61	0.032899	0.390027	0	4	4717.99	0.083582	0.00171	0	4	5490.26	-0.122745	-0.235883	0	4	6157.6	0.091095	-0.039594	0	4	6830.91	0.099586	-0.259897	0	4		983.382	-0.081317	-0.016015	0	4	2405.99	-0.208883	-0.383643	0	4	3072.5	0.037022	0.096276	0	4	3759.93	-0.084169	0.104171	0
20.559	0.220668	-0.199892	0	4	3665.65	-0.118986	0.301172	0	4	4718.03	-0.08334	0.133136	0	4	5490.3	0.192723	-0.056647	0	4	6157.65	0.238793	0.039092	0	4	6830.95	0.021187	-0.231554	0	4		983.422	0.086042	-0.108823	0	4	2406.03	-0.199357	-0.339642	0	4	3072.54	0.123338	0.149441	0	4	3759.97	-0.000497	0.013526	0
20.599	0.01367	0.043595	0	4	3665.69	0.012709	0.272765	0	4	4718.07	0.134779	0.063527	0	4	5490.34	-0.058572	-0.319878	0	4	6157.69	-0.052544	0.002062	0	4	6830.99	-0.054985	-0.160908	0	4		983.464	-0.064262	-0.027335	0	4	2406.08	-0.241737	-0.229338	0	4	3072.58	-0.141855	0.169129	0	4	3760.01	-0.172537	0.240116	0
20.639	0.080459	0.083786	0	4	3665.73	-0.097525	0.153142	0	4	4718.11	0.047211	0.003398	0	4	5490.38	0.15184	-0.076927	0	4	6157.73	0.162775	-0.190253	0	4	6831.03	0.056109	-0.201105	0	4		983.504	-0.063176	-0.009766	0	4	2406.12	-0.279269	-0.212946	0	4	3072.62	-0.019371	0.007025	0	4	3760.05	-0.113053	0.172289	0
20.679	0.027787	-0.010332	0	4	3665.77	-0.102578	0.057088	0	4	4718.15	-0.043295	-0.049612	0	4	5490.42	-0.103712	-0.079375	0	4	6157.77	0.196789	-0.100306	0	4	6831.07	-0.070293	-0.281868	0	4		983.544	0.185472	-0.150388	0	4	2406.16	-0.305069	-0.234067	0	4	3072.66	-0.166993	0.094669	0	4	3760.09	-0.172747	0.12727	0
20.719	-0.108706	0.113743	0	4	3665.81	-0.141925	-0.022896	0	4	4718.19	-0.037216	-0.200274	0	4	5490.46	-0.033052	-0.225363	0	4	6157.81	0.00165	-0.017355	0	4	6831.11	-0.199022	-0.53521	0	4		983.584	-0.002565	-0.012446	0	4	2406.2	-0.203365	-0.337777	0	4	3072.7	-0.003282	-0.004461	0	4	3760.13	-0.035888	-0.003943	0
20.759	-0.027663	0.186349	0	4	3665.85	-0.052436	0.00642	0	4	4718.23	-0.052318	-0.23636	0	4	5490.5	-0.050652	-0.323782	0	4	6157.85	0.342473	-0.1001	0	4	6831.15	-0.113598	-0.457732	0	4		983.624	-0.019696	0.008691	0	4	2406.24	-0.137191	-0.469564	0	4	3072.74	-0.056151	0.036921	0	4	3760.17	-0.224921	0.051338	0
20.799	-0.078136	0.086135	0	4	3665.89	-0.06626	0.234878	0	4	4718.27	0.086972	0.059987	0	4	5490.53	-0.059184	-0.256531	0	4	6157.89	0.004371	-0.124787	0	4	6831.19	-0.263581	-0.248156	0	4		983.664	0.068583	-0.024004	0	4	2406.28	-0.096218	-0.336309	0	4	3072.78	-0.02603	0.047631	0	4	3760.21	-0.126282	0.0598	0
20.839	0.160979	0.107146	0	4	3665.93	-0.059515	0.213013	0	4	4718.31	0.037624	0.014801	0	4	5490.58	0.121515	-0.347966	0	4	6157.93	0.165871	-0.205908	0	4	6831.23	-0.366521	-0.299304	0	4		983.704	0.026932	-0.059765	0	4	2406.32	-0.203358	-0.152607	0	4	3072.82	0.00216	0.036737	0	4	3760.25	-0.102667	0.109957	0
20.879	0.226463	-0.080651	0	4	3665.97	-0.007908	0.387244	0	4	4718.35	-0.031765	-0.176109	0	4	5490.62	0.037321	0.070098	0	4	6157.97	0.013413	-0.120006	0	4	6831.27	-0.254911	-0.190562	0	4		983.744	-0.086638	0.056441	0	4	2406.36	-0.222812	-0.066471	0	4	3072.86	-0.154427	0.210942	0	4	3760.29	-0.111059	0.064281	0
20.919	0.064156	0.137599	0	4	3666.01	-0.080957	0.282812	0	4	4718.39	-0.075248	-0.149638	0	4	5490.66	-0.072724	-0.211693	0	4	6158.01	0.335305	-0.057555	0	4	6831.31	-0.229382	-0.237294	0	4		983.784	-0.01479	0.065808	0	4	2406.4	-0.18781	-0.093429	0	4	3072.9	-0.0163	-0.034688	0	4	3760.33	-0.254717	0.115381	0
20.959	0.04507	-0.014713	0	4	3666.05	-0.018364	0.134849	0	4	4718.43	0.027269	-0.146284	0	4	5490.7	-0.08912	-0.355748	0	4	6158.05	0.170784	0.012105	0	4	6831.35	0.003148	-0.098364	0	4		983.824	-0.139558	0.073487	0	4	2406.44	-0.289464	-0.02709	0	4	3072.94	-0.0574	0.100657	0	4	3760.37	-0.175621	0.085859	0
20.999	-0.049946	0.196321	0	4	3666.09	-0.111852	0.027998	0	4	4718.47	0.177899	0.106265	0	4	5490.74	-0.022646	-0.116347	0	4	6158.09	0.04909	-0.086165	0	4	6831.39	0.064833	-0.14535	0	4		983.864	-0.05017	0.21425	0	4	2406.48	-0.369032	-0.347351	0	4	3072.98	-0.134094	-0.033931	0	4	3760.41	-0.115602	0.02191	0
21.039	0.01121	-0.110691	0	4	3666.13	-0.001523	0.227296	0	4	4718.51	-0.093061	0.054608	0	4	5490.78	0.024067	-0.112224	0	4	6158.12	0.248396	-0.038931	0	4	6831.43	0.035257	-0.174315	0	4		983.904	-0.058222	0.002815	0	4	2406.52	-0.291599	-0.225057	0	4	3073.02	-0.115366	-0.026175	0	4	3760.45	-0.116195	0.018383	0
21.079	-0.045646	0.06616	0	4	3666.17	0.004397	0.295896	0	4	4718.55	0.053959	-0.013893	0	4	5490.82	-0.139287	-0.082351	0	4	6158.16	0.036066	-0.017922	0	4	6831.47	0.054937	-0.051026	0	4		983.944	-0.086561	0.010205	0	4	2406.56	-0.222411	-0.251886	0	4	3073.06	-0.207455	0.106449	0	4	3760.49	-0.077554	0.056731	0
21.119	0.081962	0.059256	0	4	3666.21	-0.042855	0.310678	0	4	4718.59	-0.035715	-0.162992	0	4	5490.86	0.231465	-0.063411	0	4	6158.2	0.248371	-0.140589	0	4	6831.51	-0.15574	-0.127531	0	4		983.984	-0.110288	-0.010037	0	4	2406.6	-0.222175	-0.295903	0	4	3073.1	-0.057106	0.014808	0	4	3760.53	-0.186307	0.228256	0
21.159	0.034199	0.090709	0	4	3666.25	0.026846	0.115126	0	4	4718.63	0.001523	-0.143933	0	4	5490.9	-0.008558	-0.330237	0	4	6158.24	0.148813	-0.113384	0	4	6831.55	-0.229675	-0.374392	0	4		984.024	-0.137936	-0.025447	0	4	2406.64	-0.268035	-0.219272	0	4	3073.14	-0.012164	0.069132	0	4	3760.57	-0.168325	0.141086	0
21.199	0.01038	0.004369	0	4	3666.29	-0.031284	0.108082	0	4	4718.67	0.01557	0.047814	0	4	5490.94	0.000994	-0.194698	0	4	6158.28	-0.111084	-0.037745	0	4	6831.59	-0.136745	-0.447679	0	4		984.064	-0.047902	-0.051931	0	4	2406.68	-0.050409	-0.30775	0	4	3073.18	-0.117284	0.093938	0	4	3760.61	-0.09841	0.087141	0
21.239	-0.07885	0.115505	0	4	3666.33	-0.063686	0.156122	0	4	4718.71	0.099458	-0.14793	0	4	5490.98	0.117354	-0.032926	0	4	6158.32	0.362826	-0.137871	0	4	6831.63	-0.277389	-0.326587	0	4		984.104	-0.067139	-0.023179	0	4	2406.72	-0.11868	-0.103498	0	4	3073.22	-0.088228	0.025463	0	4	3760.65	-0.207793	-0.058866	0
21.277	0.036756	0.156014	0	4	3666.37	-0.080489	0.234421	0	4	4718.75	-0.062137	-0.142815	0	4	5491.02	-0.066652	-0.270646	0	4	6158.36	0.01247	-0.123885	0	4	6831.67	-0.284038	-0.261746	0	4		984.144	-0.178418	0.071496	0	4	2406.76	-0.233033	-0.329699	0	4	3073.26	0.072125	0.182355	0	4	3760.69	-0.012489	0.030237	0
21.317	0.029589	0.022728	0	4	3666.41	-0.116727	0.11244	0	4	4718.79	-0.032482	-0.169612	0	4	5491.06	0.054755	-0.183914	0	4	6158.4	0.134502	-0.158125	0	4	6831.71	-0.250046	-0.502661	0	4		984.184	-0.057833	-0.033087	0	4	2406.8	-0.228082	-0.180593	0	4	3073.3	-0.097454	0.240271	0	4	3760.73	-0.070112	-0.011177	0
21.357	0.050806	-0.065183	0	4	3666.45	0.042957	0.200296	0	4	4718.83	0.034317	0.032108	0	4	5491.1	-0.033409	0.07616	0	4	6158.44	0.043585	-0.008407	0	4	6831.75	-0.45236	-0.503943	0	4		984.222	-0.113681	0.033468	0	4	2406.84	-0.281168	-0.218183	0	4	3073.34	-0.309651	-0.04315	0	4	3760.77	-0.146628	0.043588	0
21.397	0.062155	-0.042176	0	4	3666.49	0.012932	0.313777	0	4	4718.87	-0.019811	-0.087869	0	4	5491.14	-0.104534	0.030118	0	4	6158.48	0.168981	-0.116579	0	4	6831.79	-0.432715	-0.315278	0	4		984.264	0.036308	-0.058212	0	4	2406.88	-0.259324	-0.204023	0	4	3073.38	-0.084156	-0.098199	0	4	3760.81	-0.358174	0.176682	0
21.437	0.039516	-0.18545	0	4	3666.53	-0.203285	0.346536	0	4	4718.91	-0.04737	-0.1691	0	4	5491.18	-0.153363	-0.19207	0	4	6158.52	0.158295	-0.034234	0	4	6831.83	-0.066333	-0.279849	0	4		984.302	-0.061554	-0.012775	0	4	2406.92	-0.443566	-0.193899	0	4	3073.42	-0.222392	0.085231	0	4	3760.85	-0.078466	-0.299501	0
21.477	0.056668	-0.059344	0	4	3666.57	-0.018632	0.350601	0	4	4718.96	-0.058426	-0.160522	40	4	5491.22	0.074668	-0.071	0	4	6158.56	0.011406	-0.077397	0	4	6831.87	-0.29229	-0.212292	0	4		984.344	-0.036467	0.023553	0	4	2406.96	-0.283646	-0.177265	0	4	3073.46	0.000739	0.148829	0	4	3760.89	-0.184758	-0.05829	0
21.518	0.024066	-0.085916	0	4	3666.61	-0.016551	0.262454	0	4	4719	0.039647	-0.245163	40	4	5491.26	-0.186746	-0.309634	0	4	6158.6	0.097939	-0.141968	0	4	6831.91	-0.096964	-0.157613	0	4		984.382	0.058878	-0.015713	0	4	2407	-0.242406	-0.268726	0	4	3073.5	-0.149674	0.108868	0	4	3760.93	-0.148476	0.098873	0
21.559	0.03316	0.10245	0	4	3666.65	0.00527	0.206104	0	4	4719.04	-0.00857	0.088584	40	4	5491.3	0.032383	-0.036495	0	4	6158.64	0.255195	-0.117069	0	4	6831.95	-0.078176	-0.411954	0	4		984.422	-0.092644	-0.004278	0	4	2407.04	-0.21465	-0.096325	0	4	3073.54	-0.053583	-0.032859	0	4	3760.97	-0.029694	0.077964	0
21.599	0.106877	0.06838	0	4	3666.69	-0.078835	0.324162	0	4	4719.08	-0.116485	-0.157971	40	4	5491.34	-0.048491	-0.181601	0	4	6158.68	0.194679	-0.092672	0	4	6831.99	-0.148957	-0.617771	0	4		984.462	0.062414	-0.00286	0	4	2407.07	-0.251958	-0.072095	0	4	3073.58	-0.062708	0.078625	0	4	3761.01	-0.082002	0.116653	0
21.639	-0.023948	0.016809	0	4	3666.73	-0.038545	0.21695	0	4	4719.12	-0.212579	-0.061955	40	4	5491.38	0.092949	-0.194253	0	4	6158.72	-0.075012	0.011235	0	4	6832.03	-0.034741	-0.482339	0	4		984.502	-0.03598	-0.01999	0	4	2407.12	-0.313225	-0.3643	0	4	3073.62	-0.010871	-0.071251	0	4	3761.05	-0.188403	-0.085115	0
21.679	0.011752	0.094155	0	4	3666.77	0.013158	0.345341	0	4	4719.16	-0.323418	-0.247837	40	4	5491.42	0.340077	0.172872	0	4	6158.76	0.262294	-0.080045	0	4	6832.07	0.013579	-0.312682	0	4		984.542	-0.103623	0.073667	0	4	2407.16	-0.199522	-0.393265	0	4	3073.66	-0.188766	-0.042351	0	4	3761.09	-0.061784	0.071251	0
21.719	0.14648	0.022144	0	4	3666.81	-0.065855	0.205299	0	4	4719.2	-0.350544	-0.081092	40	4	5491.46	0.32314	0.247447	0	4	6158.8	0.171695	-0.016454	0	4	6832.11	-0.092745	-0.277806	0	4		984.584	0.01168	0.154492	0	4	2407.2	-0.206041	-0.358521	0	4	3073.7	-0.339657	0.012546	0	4	3761.13	-0.055195	0.062232	0
21.759	0.010337	0.082157	0	4	3666.85	-0.087148	0.135648	0	4	4719.24	-0.17995	-0.020232	40	4	5491.5	-0.071922	-0.047267	0	4	6158.84	0.204212	-0.126507	0	4	6832.15	-0.09711	-0.21291	0	4		984.624	-0.083729	0.019307	0	4	2407.24	-0.070258	-0.195323	0	4	3073.74	-0.080728	0.012504	0	4	3761.17	-0.172466	0.097252	0
21.799	0.085512	-0.02561	0	4	3666.89	-0.015526	0.212856	0	4	4719.28	-0.24983	-0.008385	40	4	5491.54	0.075949	-0.169161	0	4	6158.88	0.053506	-0.141698	0	4	6832.19	-0.120018	-0.259382	0	4		984.662	-0.060487	0.067212	0	4	2407.28	-0.271622	-0.318911	40	4	3073.78	-0.052824	0.15952	0	4	3761.21	-0.104865	0.007753	0
21.839	0.144949	0.185587	0	4	3666.93	0.0636	0.272359	0	4	4719.32	-0.43123	-0.007924	40	4	5491.58	0.137433	0.089477	0	4	6158.92	-0.063083	-0.101111	0	4	6832.23	-0.230137	-0.249328	0	4		984.702	0.001141	-0.060119	0	4	2407.33	-0.266333	-0.220992	40	4	3073.82	-0.090649	0.046677	0	4	3761.25	-0.256922	-0.031258	40
21.879	-0.012657	0.063616	0	4	3666.97	-0.007987	0.291831	0	4	4719.36	-0.228859	-0.057742	40	4	5491.62	-0.149094	-0.304977	0	4	6158.97	0.149145	-0.315761	40	4	6832.27	-0.06569	-0.105131	0	4		984.744	-0.106261	0.039974	0	4	2407.36	-0.195559	-0.292079	40	4	3073.86	-0.311913	-0.037649	0	4	3761.29	0.003689	-0.079092	40
21.918	-0.086765	0.011018	0	4	3667.01	-0.19791	0.111467	0	4	4719.4	-0.351961	0.051058	40	4	5491.66	-0.09567	-0.2536	0	4	6159.01	0.276541	-0.137832	40	4	6832.31	-0.002552	0.11052	0	4		984.784	0.11068	-0.049708	0	4	2407.4	-0.48935	-0.082599	40	4	3073.9	-0.042126	0.013812	0	4	3761.33	-0.337981	0.01465	40
21.959	-0.034741	-0.138306	0	4	3667.05	-0.12458	0.035081	0	4	4719.43	-0.260589	-0.015027	40	4	5491.7	0.240609	-0.069332	0	4	6159.05	-0.075598	-0.029125	40	4	6832.35	-0.178259	-0.104026	0	4		984.824	-0.047431	-0.01398	0	4	2407.44	-0.690739	0.27453	40	4	3073.94	-0.012731	0.030027	0	4	3761.37	-0.442107	-0.157384	40
21.999	0.126151	-0.035386	0	4	3667.09	0.017061	0.164481	0	4	4719.48	-0.323223	-0.054685	40	4	5491.74	0.026024	0.055629	0	4	6159.09	-0.185803	0.063038	40	4	6832.39	-0.192198	-0.345418	0	4		984.862	-0.056778	-0.037571	0	4	2407.48	-0.723752	0.028597	40	4	3073.98	-0.067359	0.033242	0	4	3761.41	-0.397515	0.116808	40
22.042	0.064409	0.113923	40	4	3667.13	-0.092264	0.05484	40	4	4719.52	-0.398509	-0.19243	40	4	5491.78	-0.001918	-0.184158	0	4	6159.13	-0.244662	-0.07922	40	4	6832.43	0.069984	-0.29188	0	4		984.905	-0.0297	-0.02546	40	4	2407.52	-0.64651	-0.058299	40	4	3074.03	-0.113926	-0.039932	40	4	3761.45	-0.447498	-0.258721	40
22.09	-0.072449	0.127336	40	4	3667.18	-0.14255	0.294498	40	4	4719.55	-0.28011	-0.021169	40	4	5491.82	-0.0917	-0.07676	0	4	6159.17	-0.224972	0.201946	40	4	6832.47	0.217345	-0.084291	0	4		984.953	-0.047032	0.013168	40	4	2407.56	-0.755097	-0.083901	40	4	3074.07	-0.131717	-0.057852	40	4	3761.49	-0.588493	0.141356	40
22.122	-0.076774	0.000158	40	4	3667.21	0.010543	0.200854	40	4	4719.6	-0.474477	0.015461	40	4	5491.86	-0.048918	-0.168008	0	4	6159.21	-0.3171	0.099237	40	4	6832.51	-0.227502	0.039549	0	4		984.987	-0.032485	0.032959	40	4	2407.6	-0.760061	0.092343	40	4	3074.15	-0.263842	-0.020319	40	4	3761.53	-0.623921	0.031016	40
22.162	-0.101282	0.063376	40	4	3667.25	-0.228789	0.394076	40	4	4719.63	-0.315937	-0.066755	40	4	5491.9	-0.017192	-0.313287	40	4	6159.25	-0.380285	0.168723	40	4	6832.55	0.011189	-0.140048	0	4		985.027	-0.182174	-0.044973	40	4	2407.64	-0.732693	0.081086	40	4	3074.19	-0.358805	-0.203257	40	4	3761.57	-0.509919	0.08095	40
22.202	-0.187022	-0.026006	40	4	3667.29	-0.177774	0.189151	40	4	4719.67	-0.370514	-0.033474	40	4	5491.95	-0.072361	-0.263179	40	4	6159.29	-0.466219	0.106626	40	4	6832.59	-0.080304	0.031477	0	4		985.067	-0.145955	-0.188352	40	4	2407.68	-0.742824	0.215461	40	4	3074.23	-0.304413	-0.04583	40	4	3761.61	-0.528882	-0.143331	40
22.242	-0.19365	0.093171	40	4	3667.34	-0.180925	0.03186	40	4	4719.71	-0.305636	0.118299	40	4	5491.98	-0.038952	-0.243588	40	4	6159.33	-0.616128	0.122596	40	4	6832.63	-0.133629	-0.024551	0	4		985.107	-0.145713	-0.093664	40	4	2407.72	-0.813898	0.151776	40	4	3074.26	-0.411273	-0.0802	40	4	3761.65	-0.753325	0.063994	40
22.282	-0.254569	-0.037864	40	4	3667.37	-0.253886	0.241111	40	4	4719.75	-0.325406	-0.083956	40	4	5492.02	-0.216918	-0.291416	40	4	6159.37	-0.490535	0.164091	40	4	6832.67	-0.082356	0.003105	0	4		985.147	-0.304066	-0.071986	40	4	2407.76	-0.826477	0.213899	40	4	3074.3	-0.57088	0.124519	40	4	3761.7	-0.64068	0.082912	40
22.322	-0.223175	-0.099262	40	4	3667.41	-0.250878	0.190543	40	4	4719.79	-0.488438	-0.15501	40	4	5492.06	-0.087833	0.106387	40	4	6159.41	-0.558314	0.018831	40	4	6832.71	-0.174607	-0.142142	0	4		985.187	-0.248399	-0.066639	40	4	2407.8	-0.813732	0.0469	40	4	3074.34	-0.445892	-0.038663	40	4	3761.73	-0.736471	0.19013	40
22.362	-0.192902	-0.017658	40	4	3667.45	-0.249304	0.115139	40	4	4719.84	-0.310766	-0.163218	40	4	5492.1	-0.277153	-0.009882	40	4	6159.45	-0.436302	0.236933	40	4	6832.75	-0.151474	-0.343579	0	4		985.227	-0.144012	0.12306	40	4	2407.84	-0.810005	-0.075465	40	4	3074.39	-0.359124	-0.151963	40	4	3761.77	-0.716431	0.211773	40
22.402	-0.199013	0.085775	40	4	3667.49	-0.255409	0.195729	40	4	4719.87	-0.27397	-0.145795	40	4	5492.14	-0.30405	0.069892	40	4	6159.49	-0.461185	0.246771	40	4	6832.79	-0.240613	-0.33991	0	4		985.267	-0.196496	0.200071	40	4	2407.88	-0.662071	0.141778	40	4	3074.43	-0.467213	-0.116112	40	4	3761.81	-0.693377	0.149196	40
22.442	-0.200029	0.025946	40	4	3667.53	-0.400004	-0.103472	40	4	4719.91	-0.378619	-0.132044	40	4	5492.18	-0.306178	0.128594	40	4	6159.53	-0.669883	0.240406	40	4	6832.83	0.090936	-0.170172	0	4		985.307	-0.309249	0.408207	40	4	2407.92	-0.820691	0.051409	40	4	3074.47	-0.429567	-0.140377	40	4	3761.85	-0.739542	0.181649	40
22.482	-0.18269	0.111396	40	4	3667.57	-0.493099	-0.146413	40	4	4719.95	-0.249295	0.095413	40	4	5492.22	-0.199312	0.080792	40	4	6159.57	-0.621258	0.156882	40	4	6832.87	-0.094335	-0.102165	0	4		985.347	-0.478928	-0.008884	40	4	2407.96	-0.764177	-0.053703	40	4	3074.51	-0.393157	-0.07283	40	4	3761.89	-0.628911	0.203392	40
22.522	-0.258258	0.08957	40	4	3667.62	-0.48897	-0.131612	40	4	4720	-0.384351	-0.049428	40	4	5492.26	-0.221366	0.105009	40	4	6159.61	-0.47802	0.137124	40	4	6832.91	0.185625	-0.100093	0	4		985.387	-0.494868	0.066426	40	4	2408	-0.823386	0.183653	40	4	3074.55	-0.45935	-0.16276	40	4	3761.93	-0.703954	0.300248	40
22.56	-0.25862	0.166626	40	4	3667.66	-0.428251	0.172475	40	4	4720.03	-0.292179	0.03913	40	4	5492.3	-0.238099	-0.043208	40	4	6159.65	-0.756779	0.151445	40	4	6832.95	-0.042097	-0.110559	0	4		985.427	-0.261207	-0.091383	40	4	2408.04	-0.820589	0.175149	40	4	3074.59	-0.457973	-0.179829	40	4	3761.97	-0.410941	0.106255	40
22.602	-0.164739	0.242269	40	4	3667.7	-0.355756	0.005724	40	4	4720.07	-0.485737	-0.003582	40	4	5492.34	-0.278823	0.122036	40	4	6159.69	-0.355931	0.091048	40	4	6832.99	-0.044859	-0.271699	0	4		985.467	-0.295001	0.053612	40	4	2408.08	-0.798994	0.234975	40	4	3074.63	-0.465225	0.013252	40	4	3762.01	-0.604302	0.001034	40
22.64	-0.293579	0.131796	40	4	3667.74	-0.360952	0.001772	40	4	4720.12	-0.250492	0.069483	40	4	5492.38	-0.116188	0.041707	40	4	6159.73	-0.648779	0.174134	40	4	6833.03	-0.035636	-0.286507	0	4		985.507	-0.517017	0.085366	40	4	2408.12	-0.847791	0.145866	40	4	3074.67	-0.514277	-0.169509	40	4	3762.05	-0.777482	-0.052537	40
22.68	-0.194296	0.030739	40	4	3667.78	-0.445618	0.202116	40	4	4720.15	-0.393991	-0.021337	40	4	5492.42	-0.220926	-0.082454	40	4	6159.77	-0.439112	0.022864	40	4	6833.07	0.067232	-0.273265	0	4		985.547	-0.541607	-0.081675	40	4	2408.16	-0.822035	0.271715	40	4	3074.71	-0.483717	-0.3575	40	4	3762.09	-0.713697	0.191213	40
22.72	-0.229259	0.127191	40	4	3667.82	-0.449839	0.397671	40	4	4720.19	-0.401243	0.008684	40	4	5492.46	-0.428745	0.070382	40	4	6159.81	-0.642814	0.162796	40	4	6833.11	-0.213649	0.015864	40	4		985.587	-0.427744	0.0335	40	4	2408.2	-0.832734	0.043669	40	4	3074.75	-0.381566	-0.164271	40	4	3762.13	-0.787225	0.113851	40
22.76	-0.49481	0.167721	40	4	3667.86	-0.365827	0.210353	40	4	4720.23	-0.399819	0.090034	40	4	5492.5	-0.486903	-0.116953	40	4	6159.85	-0.626942	0.215287	40	4	6833.16	-0.127699	0.215449	40	4		985.627	-0.57975	0.054733	40	4	2408.24	-0.880429	0.197233	40	4	3074.79	-0.582892	0.008939	40	4	3762.17	-0.697181	0.053342	40
22.8	-0.362071	0.201607	40	4	3667.9	-0.381053	-0.048662	40	4	4720.27	-0.462896	0.014382	40	4	5492.54	-0.363947	0.037829	40	4	6159.89	-0.286023	0.131596	40	4	6833.19	-0.017835	-0.073187	40	4		985.667	-0.513923	0.011957	40	4	2408.28	-1.09754	0.056183	40	4	3074.83	-0.541499	-0.078525	40	4	3762.21	-0.557359	0.086262	40
22.84	-0.183116	0.107397	40	4	3667.94	-0.412225	0.00631	40	4	4720.31	-0.416271	0.103315	40	4	5492.58	-0.367229	0.015004	40	4	6159.93	-0.498398	0.140467	40	4	6833.23	-0.065607	-0.163099	40	4		985.705	-0.540944	-0.030962	40	4	2408.32	-0.880231	0.15312	40	4	3074.87	-0.467876	-0.1155	40	4	3762.25	-0.713965	0.284932	40
22.88	-0.264039	-0.021936	40	4	3667.98	-0.535843	0.082171	40	4	4720.36	-0.326416	0.014518	40	4	5492.62	-0.469743	-0.018509	40	4	6159.97	-0.616625	0.185595	40	4	6833.27	-0.091729	-0.317558	40	4		985.747	-0.624119	0.032971	40	4	2408.36	-0.895493	-0.014798	40	4	3074.91	-0.514181	-0.153902	40	4	3762.29	-0.648995	0.071847	40
22.922	-0.289921	-0.01909	40	4	3668.02	-0.439759	0.029596	40	4	4720.4	-0.346494	0.047257	40	4	5492.66	-0.485743	-0.282899	40	4	6160.01	-0.573901	0.116792	40	4	6833.31	-0.105324	-0.193989	40	4		985.785	-0.438688	-0.079865	40	4	2408.4	-1.15726	-0.12479	40	4	3074.95	-0.548374	-0.048778	40	4	3762.33	-0.803505	0.086503	40
22.96	-0.257841	0.028051	40	4	3668.06	-0.42603	0.064023	40	4	4720.44	-0.419276	0.008636	40	4	5492.7	-0.299277	0.267309	40	4	6160.05	-0.76187	0.045598	40	4	6833.35	-0.39186	-0.14018	40	4		985.825	-0.57852	-0.161108	40	4	2408.44	-1.04114	0.079823	40	4	3074.99	-0.485329	-0.12508	40	4	3762.37	-0.718094	0.155764	40
23.002	-0.317737	0.088001	40	4	3668.1	-0.514968	0.193303	40	4	4720.48	-0.399102	0.021598	40	4	5492.74	-0.472769	0.042158	40	4	6160.09	-0.565215	0.156663	40	4	6833.39	-0.458142	-0.14229	40	4		985.865	-0.492424	-0.02604	40	4	2408.48	-0.928366	0.004429	40	4	3075.03	-0.660822	-0.106323	40	4	3762.41	-0.831804	0.057417	40
23.042	-0.247126	0.122625	40	4	3668.14	-0.536168	0.072781	40	4	4720.52	-0.430742	0.020419	40	4	5492.78	-0.379221	-0.044336	40	4	6160.13	-0.789869	0.137491	40	4	6833.43	-0.565738	-0.227215	40	4		985.907	-0.547695	-0.185937	40	4	2408.52	-0.94947	-0.129622	40	4	3075.07	-0.460299	-0.202548	40	4	3762.45	-0.710645	0.190536	40
23.082	-0.239252	0.080768	40	4	3668.18	-0.473773	-0.08392	40	4	4720.56	-0.403339	0.030955	40	4	5492.82	-0.456106	0.100628	40	4	6160.17	-0.632224	0.097568	40	4	6833.47	-0.304814	-0.045157	40	4		985.945	-0.34068	-0.186471	40	4	2408.56	-0.851901	-0.100061	40	4	3075.11	-0.462606	-0.067808	40	4	3762.49	-0.82596	0.071464	40
23.122	-0.287188	0.143708	40	4	3668.22	-0.464119	-0.139043	40	4	4720.6	-0.439647	-0.02517	40	4	5492.86	-0.480677	-0.057697	40	4	6160.21	-0.421723	0.087067	40	4	6833.51	-0.341208	-0.1686	40	4		985.985	-0.660035	0.053252	40	4	2408.6	-0.918464	-0.152556	40	4	3075.15	-0.488967	-0.015706	40	4	3762.53	-0.765279	0.132566	40
23.162	-0.274316	0.20612	40	4	3668.26	-0.478348	0.199359	40	4	4720.64	-0.46467	0.151992	40	4	5492.9	-0.385644	-0.056415	40	4	6160.25	-0.794412	0.144249	40	4	6833.55	-0.395005	-0.183311	40	4		986.027	-0.45019	-0.177066	40	4	2408.64	-1.0588	-0.131313	40	4	3075.19	-0.572977	-0.003517	40	4	3762.57	-0.809183	0.149203	40
23.202	-0.266752	0.116236	40	4	3668.3	-0.578788	0.316389	40	4	4720.68	-0.441183	0.114656	40	4	5492.94	-0.485284	-0.081611	40	4	6160.29	-0.645351	0.268829	40	4	6833.59	-0.460041	-0.177932	40	4		986.065	-0.577963	-0.105157	40	4	2408.68	-0.831619	-0.132971	40	4	3075.23	-0.55279	-0.093129	40	4	3762.61	-0.7957	0.183379	40
23.242	-0.250719	0.13421	40	4	3668.34	-0.475188	-0.038138	40	4	4720.72	-0.477864	0.047837	40	4	5492.98	-0.356759	0.261208	40	4	6160.33	-0.647817	0.235027	40	4	6833.63	-0.438746	-0.319472	40	4		986.105	-0.581197	-0.021614	40	4	2408.72	-0.913245	0.161343	40	4	3075.27	-0.487578	-0.033129	40	4	3762.65	-0.830829	0.205804	40
23.282	-0.436517	0.287992	40	4	3668.38	-0.447851	0.037926	40	4	4720.76	-0.391984	0.004126	40	4	5493.02	-0.373059	-0.082854	40	4	6160.37	-0.681977	0.166474	40	4	6833.67	-0.42027	-0.081279	40	4		986.145	-0.627114	-0.033062	40	4	2408.76	-0.939855	0.029512	40	4	3075.31	-0.482181	-0.165862	40	4	3762.69	-0.768637	0.034292	40
23.322	-0.381018	0.14463	40	4	3668.42	-0.467331	-0.003347	40	4	4720.79	-0.529156	0.031841	40	4	5493.06	-0.508714	-0.017207	40	4	6160.41	-0.383102	0.065576	40	4	6833.71	-0.262663	-0.103833	40	4		986.185	-0.606229	-0.008993	40	4	2408.8	-0.958213	-0.013741	40	4	3075.36	-0.582707	0.045115	40	4	3762.73	-0.812993	0.074972	40
23.362	-0.284491	0.13914	40	4	3668.46	-0.571868	0.099597	40	4	4720.84	-0.440648	-0.022045	40	4	5493.1	-0.455641	0.151805	40	4	6160.45	-0.393953	0.217291	40	4	6833.75	-0.256807	-0.045109	40	4		986.225	-0.582149	0.005141	40	4	2408.84	-0.9458	0.158499	40	4	3075.39	-0.48775	-0.282905	40	4	3762.77	-0.780133	0.18537	40
23.402	-0.339102	0.138349	40	4	3668.49	-0.406032	-0.080509	40	4	4720.87	-0.479486	-0.108462	40	4	5493.14	-0.38242	0.0825	40	4	6160.49	-0.642942	0.166094	40	4	6833.79	-0.393606	-0.111354	40	4		986.265	-0.563272	-0.024938	40	4	2408.88	-0.915437	0.009824	40	4	3075.43	-0.603473	-0.223005	40	4	3762.81	-0.779221	0.081559	40
23.442	-0.29185	0.128723	40	4	3668.54	-0.39619	-0.023579	40	4	4720.92	-0.490455	-0.068478	40	4	5493.18	-0.416179	0.103038	40	4	6160.53	-0.43151	0.074859	40	4	6833.83	-0.289276	-0.262558	40	4		986.305	-0.568051	-0.056157	40	4	2408.92	-0.955084	-0.110014	40	4	3075.47	-0.609654	-0.151699	40	4	3762.85	-0.738899	0.119497	40
23.482	-0.258669	0.121928	40	4	3668.57	-0.547491	0.188111	40	4	4720.96	-0.475933	-0.012711	40	4	5493.22	-0.372333	0.031148	40	4	6160.57	-0.591207	0.068391	40	4	6833.87	-0.308746	-0.134502	40	4		986.345	-0.565585	-0.024062	40	4	2408.96	-0.861128	0.173281	40	4	3075.51	-0.635391	-0.113348	40	4	3762.89	-0.835264	0.165901	40
23.522	-0.265991	0.123714	40	4	3668.61	-0.596604	0.272334	40	4	4720.99	-0.509128	-0.021865	40	4	5493.26	-0.308574	0.173651	40	4	6160.61	-0.66664	0.24011	40	4	6833.91	-0.303002	-0.256064	40	4		986.387	-0.511674	-0.216454	40	4	2409	-0.897812	-0.01214	40	4	3075.55	-0.559366	-0.183469	40	4	3762.93	-0.725632	0.060728	40
23.562	-0.259496	0.239691	40	4	3668.65	-0.434008	0.105595	40	4	4721.03	-0.426875	0.091934	40	4	5493.3	-0.51933	0.057117	40	4	6160.65	-0.753427	0.189306	40	4	6833.95	-0.299271	-0.109232	40	4		986.427	-0.693874	0.065724	40	4	2409.04	-0.771199	-0.225492	40	4	3075.59	-0.528907	-0.119894	40	4	3762.97	-0.835652	-0.000767	40
23.602	-0.380602	0.089733	40	4	3668.69	-0.539819	0.096608	40	4	4721.07	-0.440348	0.007248	40	4	5493.34	-0.341326	-0.021575	40	4	6160.69	-0.614624	0.181839	40	4	6833.99	-0.531259	-0.052975	40	4		986.467	-0.643624	-0.099269	40	4	2409.08	-0.953491	0.221398	40	4	3075.62	-0.731979	-0.149934	40	4	3763.01	-0.83139	0.184838	40
23.642	-0.299046	0.089021	40	4	3668.73	-0.475417	0.040535	40	4	4721.11	-0.639654	0.014495	40	4	5493.38	-0.331106	0.111258	40	4	6160.73	-0.651321	0.161572	40	4	6834.03	-0.45409	-0.254653	40	4		986.507	-0.575248	-0.207447	40	4	2409.12	-0.907536	-0.008249	40	4	3075.67	-0.441323	-0.17283	40	4	3763.05	-0.776367	0.174669	40
23.682	-0.286555	0.14703	40	4	3668.77	-0.511974	0.189576	40	4	4721.15	-0.293752	-0.125701	40	4	5493.42	-0.224138	-0.004078	40	4	6160.77	-0.589448	0.191928	40	4	6834.07	-0.328334	-0.169918	40	4		986.547	-0.446612	-0.184609	40	4	2409.16	-1.11963	0.0332	40	4	3075.7	-0.635996	-0.155242	40	4	3763.09	-0.764113	0.122361	40
23.722	-0.290597	0.09245	40	4	3668.81	-0.500548	0.203759	40	4	4721.19	-0.447275	-0.009258	40	4	5493.46	-0.396719	0.069847	40	4	6160.81	-0.617759	0.004677	40	4	6834.11	-0.202807	-0.058602	40	4		986.587	-0.668488	-0.054173	40	4	2409.2	-1.1196	0.12335	40	4	3075.74	-0.500622	-0.208124	40	4	3763.13	-0.819563	0.063588	40
23.762	-0.18844	0.011319	40	4	3668.85	-0.571301	0.074672	40	4	4721.23	-0.583959	0.033187	40	4	5493.5	-0.466009	0.025086	40	4	6160.85	-0.361067	0.178631	40	4	6834.15	-0.41694	-0.188062	40	4		986.627	-0.558805	-0.052131	40	4	2409.24	-0.933999	0.108368	40	4	3075.78	-0.538637	-0.185286	40	4	3763.17	-0.87939	0.192997	40
23.802	-0.347577	-0.022662	40	4	3668.89	-0.467876	-0.058853	40	4	4721.27	-0.524899	-0.175429	40	4	5493.54	-0.188518	0.039903	40	4	6160.89	-0.583115	0.286539	40	4	6834.19	-0.242508	-0.137874	40	4		986.667	-0.60153	-0.034047	40	4	2409.28	-1.02917	0.036309	40	4	3075.82	-0.676771	-0.181031	40	4	3763.21	-0.831778	0.156727	40
[truncated: 14,998 more rows]
[truncated: 116 more columns]

## Sheet: A390-4D
Experiment 1																																				Experiment 2
[truncated: 15,581 more rows]
[truncated: 126 more columns]

[truncated: 3 more sheets: -WT-4E, A390-4E, A220-4E]
