# Supplementary material for: Fibrinogen αC-subregions critically contribute blood clot fibre growth, mechanical stability, and resistance to fibrinolysis
Source: eLife. 2021 Oct 11;10:e68761. doi: 10.7554/eLife.68761 (PMC8553339; doi:10.7554/eLife.68761)
Supplement: Figure 5—source data 1. [file elife-68761-fig5-data1.xlsx]

## Sheet: Figure 5 source data 
Figure 5B						Figure 5C							Figure 5D
	WT		a390			Clot Weight
Experiment 1	area (pixel)		area (pixel)					Weight of weighting boat (g)	Weight of weighting boat and retracted clot (g)	Clot Weight	mg				Experiment 1					Experiment 2				Experiment 2
Time (min)	Box	Clot	Box	Clot										Activation	Dilution	415		Average	Blank	415		Average	Blank	415		Average	Blank
0						Experiment 1	WT	0.5597	0.58468	0.02498	25		WT	Pre	1 in 100	0.558	0.57	0.564	0.564	1.506	1.43	1.468	1.436	0.774	0.787	0.7805	0.7515
60	1326	624	1280	400			390	0.51264	0.53888	0.02624	26				1 in 200	0.48	0.483	0.4815	0.4815	0.554	0.576	0.565	0.533	0.657	0.692	0.6745	0.6745
90	1085	304	1050	285			220	0.516	0.516	0	0			Post	1 in 100	0.223	0.222	0.2225	0.2225	0.313	0.31	0.3115	0.2795	0.138	0.118	0.128	0.128
120	522	154	575	121		Experiment 2	WT	0.517	0.55	0.033	33				1 in 200	0.133	0.129	0.131	0.131	0.182	0.181	0.1815	0.1495	0.072	0.07	0.071	0.071
							390	0.492	0.519	0.027	27
	WT		a390				220	0.516	0.516	0	0		a390	Pre	1 in 100	0.549	0.55	0.5495	0.5495	1.078	1.067	1.0725	1.0405	1.8	1.565	1.6825	1.6825
Experiment 2	area (pixel)		area (pixel)			Experiment 3	WT	0.518	0.544	0.026	26				1 in 200	0.598	0.601	0.5995	0.5995	0.658	0.695	0.6765	0.6445	0.546	0.559	0.5525	0.5525
Time (min)	Box	Clot	Box	Clot			390	0.487	0.51	0.023	23			Post	1 in 100	0.163	0.169	0.166	0.166	0.573	0.554	0.5635	0.5315	0.107	0.105	0.106	0.106
0							220	0.479	0.479	0	0				1 in 200	0.098	0.096	0.097	0.097	0.21	0.213	0.2115	0.1795	0.071	0.072	0.0715	0.0715
60	754	312	598	264
90	780	240	672	208									a220	Pre	1 in 100	1.108	1.049	1.0785	1.0785	1.178	1.168	1.173	1.141	1.429	1.161	1.295	1.295
120	780	156	672	154											1 in 200	0.987	0.971	0.979	0.979	0.616	0.652	0.634	0.602	0.817	0.8	0.8085	0.8085
														Post	1 in 100	0.581	0.608	0.5945	0.5945	0.879	0.865	0.872	0.84	0.609	0.627	0.618	0.618
	WT		a390												1 in 200	0.287	0.284	0.2855	0.2855	0.415	0.429	0.422	0.39	0.33	0.334	0.332	0.332
Experiment 2	area (pixel)		area (pixel)
Time (min)	Box	Clot	Box	Clot									TF+	Pre	1 in 100	1.067	1.046	1.0565	1.0565	1.072	1.078	1.075	1.043	1.048	1.002	1.025	1.025
0															1 in 200	0.701	0.693	0.697	0.697	0.574	0.551	0.5625	0.5305	0.871	0.89	0.8805	0.8805
60	418	143	414	121										Post	1 in 100	0.646	0.643	0.6445	0.6445	0.928	0.913	0.9205	0.8885	0.49	0.465	0.4775	0.4775
90	399	110	378	90											1 in 200	0.355	0.35	0.3525	0.3525	0.387	0.38	0.3835	0.3515	0.366	0.359	0.3625	0.3625
120	399	117	418	104
													TF-	Pre	1 in 100	1.168	1.214	1.191	1.191	1.221	1.208	1.2145	1.1825	0.702	0.75	0.726	0.726
															1 in 200	0.37	0.363	0.3665	0.3665	0.688	0.689	0.6885	0.6565	0.363	0.373	0.368	0.368
														Post	1 in 100	0.652	0.65	0.651	0.651	0.621	0.612	0.6165	0.5845	0.625	0.612	0.6185	0.6185
															1 in 200	0.265	0.266	0.2655	0.2655	0.487	0.471	0.479	0.447	0.349	0.361	0.355	0.355

## Sheet: Sheet1
		Experiment 1					Experiment 2				Experiment 2
	Activation	Dilution	415		Average	Blank	415		Average	Blank	415		Average	Blank
WT	Pre	1 in 100	0.558	0.57	0.564	0.564	1.506	1.43	1.468	1.436	0.774	0.787	0.7805	0.7515
		1 in 200	0.48	0.483	0.4815	0.4815	0.554	0.576	0.565	0.533	0.657	0.692	0.6745	0.6745
	Post	1 in 100	0.223	0.222	0.2225	0.2225	0.313	0.31	0.3115	0.2795	0.138	0.118	0.128	0.128
		1 in 200	0.133	0.129	0.131	0.131	0.182	0.181	0.1815	0.1495	0.072	0.07	0.071	0.071
a390	Pre	1 in 100	0.549	0.55	0.5495	0.5495	1.078	1.067	1.0725	1.0405	1.8	1.565	1.6825	1.6825
		1 in 200	0.598	0.601	0.5995	0.5995	0.658	0.695	0.6765	0.6445	0.546	0.559	0.5525	0.5525
	Post	1 in 100	0.163	0.169	0.166	0.166	0.573	0.554	0.5635	0.5315	0.107	0.105	0.106	0.106
		1 in 200	0.098	0.096	0.097	0.097	0.21	0.213	0.2115	0.1795	0.071	0.072	0.0715	0.0715
a220	Pre	1 in 100	1.108	1.049	1.0785	1.0785	1.178	1.168	1.173	1.141	1.429	1.161	1.295	1.295
		1 in 200	0.987	0.971	0.979	0.979	0.616	0.652	0.634	0.602	0.817	0.8	0.8085	0.8085
	Post	1 in 100	0.581	0.608	0.5945	0.5945	0.879	0.865	0.872	0.84	0.609	0.627	0.618	0.618
		1 in 200	0.287	0.284	0.2855	0.2855	0.415	0.429	0.422	0.39	0.33	0.334	0.332	0.332
TF+	Pre	1 in 100	1.067	1.046	1.0565	1.0565	1.072	1.078	1.075	1.043	1.048	1.002	1.025	1.025
		1 in 200	0.701	0.693	0.697	0.697	0.574	0.551	0.5625	0.5305	0.871	0.89	0.8805	0.8805
	Post	1 in 100	0.646	0.643	0.6445	0.6445	0.928	0.913	0.9205	0.8885	0.49	0.465	0.4775	0.4775
		1 in 200	0.355	0.35	0.3525	0.3525	0.387	0.38	0.3835	0.3515	0.366	0.359	0.3625	0.3625
TF-	Pre	1 in 100	1.168	1.214	1.191	1.191	1.221	1.208	1.2145	1.1825	0.702	0.75	0.726	0.726
		1 in 200	0.37	0.363	0.3665	0.3665	0.688	0.689	0.6885	0.6565	0.363	0.373	0.368	0.368
	Post	1 in 100	0.652	0.65	0.651	0.651	0.621	0.612	0.6165	0.5845	0.625	0.612	0.6185	0.6185
		1 in 200	0.265	0.266	0.2655	0.2655	0.487	0.471	0.479	0.447	0.349	0.361	0.355	0.355
							19
