# Supplementary material for: Fibrinogen αC-subregions critically contribute blood clot fibre growth, mechanical stability, and resistance to fibrinolysis
Source: eLife. 2021 Oct 11;10:e68761. doi: 10.7554/eLife.68761 (PMC8553339; doi:10.7554/eLife.68761)
Supplement: Figure 6—source data 1. [file elife-68761-fig6-data1.xlsx]

## Sheet: Figure 6
Figure 6 A																	Figure 6 D
																		WT			α390			α220			Fbg -/-
	WT			α390			α220			Fbg -/-		Figure 6 B					time (s)	Experiment 1	Experiment 2	Experiment3	Experiment 1	Experiment 2	Experiment3	Experiment 1	Experiment 2	Experiment3
Time (seconds)	Experiment 1	Experiment 2	Experiment3	Experiment 1	Experiment 2	Experiment3	Experiment 1	Experiment 2	Experiment3								2.125	0	0	0	0	0	0	0	0	0	0
2.125	0	0	0	0	0	0	0	0	0	0		Clotting Time					5.8	0	0	0	0	0	0	0	0	0	0
5.8	0	0	0	0	0	0	0	0	0	0			WT	α390	α220		8.95	0	0	0	0	0	0	0	0	0	0
8.95	0	0	0	0	0	0	0	0	0	0		Experiment 1	76	131	554		12.1	0	0	0	0	0	0	0	0	0	0
12.1	0	0	0	0	0	0	0	0	0	0		Experiment 2	46	106	369		15.25	0	0	0	0	0	0	0	0	0	0
15.25	0	0	0	0	0	0	0	0	0	0		Experiment 3	74	95	354		18.4	0	0	0	0	0	0	0	0	0	0
18.4	0	0	0	0	0	0	0	0	0	0							21.55	0	0	0	0	0	0	0	0	0	0
21.55	0	0	0	0	0	0	0	0	0	0		Figure 6 C					24.7	0	0	0	0	0	0	0	0	0	0
24.7	0	0	0	0	0	0	0	0	0	0							27.85	0	0	0	0	0	0	0	0	0	0
27.85	0	0	0	0	0	0	0	0	0	0		Maximum Clot Firmness					31	0	0	0	0	0	0	0	0	0	0
31	0	0	0	0	0	0	0	0	0	0			WT	α390	α220		34.15	0	0	0	0	0	0	0	0	0	0
34.15	0	0	0	0	0	0	0	0	0	0		Experiment 1	43	15	5		37.3	0	0	0	0	0	0	0	0	0	0
37.3	0	0	0	0	0	0	0	0	0	0		Experiment 2	53	25	9		40.45	0	0	0	0	0	0	0	0	0	0
40.45	0	0	0	0	0	0	0	0	0	0		Experiment 3	41	32	7		43.6	0	0	0	0	0	0	0	0	0	0
43.6	0	0.14385	0	0	0	0	0	0	0	0							46.75	0	0	0	0	0	0	0	0	0	0
46.75	0	0.61644	0	0	0	0	0	0	0	0							49.9	0	0	0	0	0	0	0	0	0	0
49.9	0	1.07875	0	0	0	0	0	0	0	0							53.05	0	0	0	0	0	0	0	0	0	0
53.05	0.02631	1.54054	0	0	0	0	0	0	0	0		Figure 6 E					56.2	0	0	0.1	0	0	0	0	0	0	0
56.2	1.58844	2.00021	0	0	0	0	0	0	0	0							59.35	0	0.3	0.5	0	0	0	0	0	0	0
59.35	4.16994	2.47814	0	0	0	0	0	0	0	0		Clotting Time					62.5	0	0.6	0.9	0	0	0	0	0	0	0
62.5	5.84833	2.98552	0	0	0	0	0	0	0	0			WT	α390	α220		65.65	0	0.9	1.3	0	0	0	0	0	0	0
65.65	6.11443	3.52078	0	0	0	0	0	0	0	0		Experiment 1	73	123	275		68.8	0.2	1.1	1.6	0	0	0	0	0	0	0
68.8	6.28709	4.08384	0.04445	0	0	0	0	0	0	0		Experiment 2	59	96	458		71.95	0.4	1.3	1.9	0	0	0	0	0	0	0
71.95	6.48669	4.66816	0.2782	0	0	0	0	0	0	0		Experiment 3	59	98	272		75.1	0.6	1.5	2.2	0	0	0	0	0	0	0
75.1	6.68324	5.2599	0.53514	0	0	0	0	0	0	0							78.25	0.9	1.7	2.5	0	0	0	0	0	0	0
78.25	6.89934	5.85231	0.79559	0	0	0	0	0	0	0							81.4	1.1	2	2.9	0	0	0	0	0	0	0
81.4	7.11173	6.43348	1.06704	0	0	0	0	0	0	0		Figure 6 F					84.55	1.3	2.2	3.2	0	0	0	0	0	0	0
84.55	7.31829	7.01028	1.37142	0	0	0	0	0	0	0							87.7	1.6	2.5	3.6	0	0	0	0	0	0	0
87.7	7.50678	7.58257	1.6854	0	0	0	0	0	0	0		Maximum Clot Firmness					90.85	1.9	2.8	3.9	0	0	0.1	0	0	0	0
90.85	7.67592	8.14037	2.01295	0	0	0	0	0	0	0			WT	α390	α220		94	2.1	3.2	4.3	0	0.3	0.2	0	0	0	0
94	7.83356	8.6782	2.34376	0	0	0	0	0	0	0		Experiment 1	44	33	16		97.15	2.4	3.5	4.6	0	0.5	0.4	0	0	0	0
97.15	7.9771	9.1932	2.66097	0	0.04945	0.04945	0	0	0	0		Experiment 2	43	29	13		100.3	2.6	3.8	4.9	0	0.8	0.6	0	0	0	0
100.3	8.12702	9.6933	2.97629	0	0.21396	0.21396	0	0	0	0		Experiment 3	49	32	18		103.45	2.9	4.1	5.3	0	0.9	0.7	0	0	0	0
103.45	8.28557	10.1839	3.30511	0	0.37085	0.37085	0	0	0	0							106.6	3.2	4.4	5.6	0	1	0.9	0	0	0	0
106.6	8.44311	10.6622	3.64647	0	0.50752	0.50752	0	0	0	0							109.75	3.4	4.7	6	0	1	1.1	0	0	0	0
109.75	8.6104	11.1281	3.99191	0	0.62489	0.62489	0	0	0	0							112.9	3.7	5	6.3	0	1	1.3	0	0	0	0
112.9	8.7958	11.5875	4.3401	0.03038	0.73719	0.73719	0	0	0	0							116.05	4	5.3	6.7	0	1	1.4	0	0	0	0
116.05	8.9934	12.0387	4.69122	0.11452	0.84999	0.84999	0	0	0	0							119.2	4.3	5.6	7.1	0	1	1.6	0	0	0	0
119.2	9.1834	12.4741	5.0363	0.19297	0.96661	0.96661	0	0	0	0							122.35	4.6	5.9	7.5	0.3	1.1	1.8	0	0	0	0
122.35	9.3585	12.898	5.36131	0.26842	1.09972	1.09972	0	0	0	0							125.5	4.8	6.2	7.9	0.6	1.1	2.1	0	0	0	0
125.5	9.524	13.3101	5.66415	0.34694	1.25215	1.25215	0	0	0	0							128.65	5.1	6.5	8.3	1	1.2	2.3	0	0	0	0
128.65	9.6804	13.7055	5.95357	0.43328	1.42584	1.42584	0	0	0	0							131.8	5.3	6.7	8.7	1.4	1.3	2.5	0	0	0	0
131.8	9.8312	14.0783	6.23993	0.51846	1.62028	1.62028	0	0	0	0							134.95	5.6	7	9.1	1.8	1.4	2.7	0	0	0	0
134.95	9.996	14.4346	6.53609	0.6118	1.82357	1.82357	0	0	0	0							138.1	6	7.2	9.5	2.2	1.6	2.9	0	0	0	0
138.1	10.2053	14.7774	6.83957	0.73099	2.02353	2.02353	0	0	0	0							141.25	6.6	7.4	9.8	2.5	1.8	3.1	0	0	0	0
141.25	10.4911	15.103	7.13668	0.85368	2.22547	2.22547	0	0	0	0							144.4	7.2	7.7	10.2	2.8	1.9	3.4	0	0	0	0
144.4	10.8344	15.4161	7.42536	0.97736	2.4286	2.4286	0	0	0	0							147.55	7.8	7.9	10.5	3.1	2.1	3.6	0	0	0	0
147.55	11.1615	15.7274	7.70826	1.0911	2.61946	2.61946	0	0	0	0							150.7	8.3	8.2	10.8	3.2	2.3	3.8	0	0	0	0
150.7	11.4887	16.0406	7.96598	1.1959	2.80128	2.80128	0	0	0	0							153.85	8.6	8.4	11.2	3.4	2.6	4	0	0	0	0
153.85	11.7659	16.3475	8.19332	1.28114	2.9713	2.9713	0	0	0	0							157	8.9	8.6	11.5	3.7	2.9	4.2	0	0	0	0
157	11.969	16.6554	8.40082	1.3513	3.12021	3.12021	0	0	0	0							160.15	9.1	8.9	11.8	3.8	3.2	4.4	0	0	0	0
160.15	12.1237	16.9667	8.5973	1.423	3.2608	3.2608	0	0	0	0							163.3	9.4	9.1	12.1	4	3.5	4.7	0	0	0	0
163.3	12.2584	17.2694	8.7889	1.48921	3.39587	3.39587	0	0	0	0							166.45	9.6	9.3	12.4	4.4	3.9	4.9	0	0	0	0
166.45	12.3844	17.5553	8.9772	1.55699	3.52968	3.52968	0	0	0	0							169.6	9.8	9.5	12.7	4.5	4.2	5.1	0	0	0	0
169.6	12.5117	17.8308	9.1688	1.63913	3.66002	3.66002	0	0	0	0							172.75	10	9.7	13	4.8	4.5	5.4	0	0	0	0
172.75	12.6494	18.0983	9.3624	1.73778	3.78267	3.78267	0	0	0	0							175.9	10.2	10	13.2	5	4.6	5.6	0	0	0	0
175.9	12.7924	18.3515	9.5441	1.84428	3.925	3.925	0	0	0	0							179.05	10.4	10.2	13.5	5.3	4.8	5.8	0	0	0	0
179.05	12.9243	18.6099	9.7237	1.9535	4.06843	4.06843	0	0	0	0							182.2	10.6	10.4	13.8	5.6	4.9	6.1	0	0	0	0
182.2	13.0455	18.8667	9.9072	2.0698	4.19401	4.19401	0	0	0	0							185.35	10.8	10.6	14.1	5.9	5	6.3	0	0	0	0
185.35	13.1747	19.1214	10.0825	2.18619	4.32246	4.32246	0	0	0	0							188.5	11.1	10.8	14.4	6.1	5.1	6.5	0	0	0	0
188.5	13.3036	19.3626	10.2503	2.2895	4.45654	4.45654	0	0	0	0							191.65	11.3	11	14.6	6.3	5.4	6.7	0	0	0	0
191.65	13.4327	19.6009	10.4192	2.38819	4.59231	4.59231	0	0	0	0							194.8	11.5	11.1	14.9	6.5	5.5	7	0	0	0	0
194.8	13.5752	19.8303	10.5971	2.47825	4.72606	4.72606	0	0	0	0							197.95	11.7	11.3	15.1	6.6	5.7	7.2	0	0	0	0
197.95	13.731	20.045	10.7798	2.56632	4.86887	4.86887	0	0	0	0							201.1	11.9	11.4	15.4	6.7	5.8	7.4	0	0	0	0
201.1	13.8962	20.2515	10.9704	2.6553	5.00675	5.00675	0	0	0	0							204.25	12.1	11.6	15.6	6.9	5.9	7.6	0	0	0	0
204.25	14.0772	20.4633	11.1645	2.74202	5.13124	5.13124	0	0	0	0							207.4	12.2	11.7	15.9	7	6	7.8	0	0	0	0
207.4	14.2513	20.6771	11.3568	2.82113	5.24531	5.24531	0	0	0	0							210.55	12.4	11.9	16.1	7.1	6.1	8	0	0	0	0
210.55	14.4188	20.8886	11.551	2.89155	5.34906	5.34906	0	0	0	0							213.7	12.6	12.1	16.4	7.3	6.3	8.2	0	0	0	0
213.7	14.5692	21.0923	11.7418	2.96269	5.44005	5.44005	0	0	0	0							216.85	12.8	12.2	16.6	7.5	6.5	8.3	0	0	0	0
216.85	14.7047	21.292	11.9249	3.03463	5.52413	5.52413	0	0	0	0							220	12.9	12.4	16.8	7.7	6.6	8.5	0	0	0	0
220	14.8406	21.4809	12.0977	3.10572	5.61938	5.61938	0	0	0	0							223.15	13.1	12.6	17	8	6.8	8.7	0	0	0	0
223.15	14.972	21.6642	12.2616	3.17279	5.71953	5.71953	0	0	0	0							226.3	13.2	12.7	17.3	8.3	7	8.9	0	0	0	0
226.3	15.0942	21.8325	12.4262	3.24717	5.82644	5.82644	0	0	0	0							229.45	13.4	12.9	17.5	8.6	7.2	9	0	0	0	0
229.45	15.2145	21.9983	12.5916	3.33166	5.9461	5.9461	0	0	0	0							232.6	13.6	13	17.7	8.8	7.5	9.2	0	0	0	0
232.6	15.3353	22.1704	12.7542	3.41077	6.06045	6.06045	0	0	0	0							235.75	13.7	13.2	17.9	8.9	7.7	9.3	0	0	0	0
235.75	15.4556	22.3537	12.9102	3.48897	6.16543	6.16543	0	0	0	0							238.9	13.9	13.3	18.1	9	8	9.4	0.1	0	0	0
238.9	15.5723	22.5582	13.0671	3.56822	6.26149	6.26149	0	0	0	0							242.05	14	13.4	18.3	9.1	8.2	9.6	0.1	0	0	0
242.05	15.69	22.7484	13.2191	3.64189	6.3481	6.3481	0	0	0	0							245.2	14.1	13.6	18.5	9.3	8.3	9.7	0.1	0	0	0
245.2	15.8095	22.9346	13.3669	3.70398	6.43636	6.43636	0	0	0	0							248.35	14.2	13.7	18.7	9.3	8.4	9.8	0.2	0	0	0
248.35	15.9254	23.1309	13.5083	3.76097	6.5181	6.5181	0	0	0	0							251.5	14.2	13.8	18.8	9.4	8.4	10	0.2	0	0	0
251.5	16.0445	23.3293	13.6414	3.8143	6.6106	6.6106	0	0	0	0							254.65	14.3	14	19	9.6	8.5	10.1	0.2	0	0	0
254.65	16.1742	23.52	13.7635	3.8609	6.71666	6.71666	0	0	0	0							257.8	14.4	14.1	19.2	9.8	8.5	10.3	0.3	0	0.1	0
257.8	16.3047	23.7087	13.8819	3.90293	6.84063	6.84063	0	0	0	0							260.95	14.6	14.2	19.3	9.8	8.6	10.4	0.3	0	0.2	0
260.95	16.431	23.8874	14.0078	3.95535	6.95749	6.95749	0	0	0	0							264.1	14.7	14.3	19.5	9.9	8.8	10.6	0.3	0	0.3	0
264.1	16.5541	24.0489	14.1352	4.01009	7.07825	7.07825	0	0	0	0							267.25	14.8	14.4	19.7	9.9	8.9	10.8	0.4	0	0.3	0
267.25	16.6686	24.1929	14.2625	4.06359	7.18973	7.18973	0	0	0	0							270.4	14.9	14.6	19.8	10.1	9	11	0.4	0	0.4	0
270.4	16.7715	24.3444	14.3885	4.12891	7.28977	7.28977	0	0	0	0							273.55	15.1	14.7	20	10.5	9.2	11.1	0.5	0	0.5	0
273.55	16.8648	24.4957	14.5147	4.20129	7.40437	7.40437	0	0	0	0							276.7	15.2	14.8	20.2	10.8	9.3	11.3	0.5	0	0.6	0
276.7	16.9544	24.6414	14.6358	4.267	7.51881	7.51881	0	0	0	0							279.85	15.3	14.9	20.3	11.1	9.4	11.4	0.6	0	0.7	0
279.85	17.0479	24.7892	14.7584	4.32968	7.62337	7.62337	0	0	0	0							283	15.4	15.1	20.5	11.4	9.6	11.6	0.6	0	0.7	0
283	17.147	24.9396	14.878	4.39398	7.70397	7.70397	0	0	0	0							286.15	15.6	15.2	20.6	11.5	9.7	11.7	0.7	0	0.8	0
286.15	17.2451	25.0813	14.9951	4.46197	7.78697	7.78697	0	0	0	0							289.3	15.7	15.3	20.8	11.5	9.8	11.8	0.7	0	0.8	0
289.3	17.3463	25.2124	15.1107	4.52521	7.87083	7.87083	0	0	0	0							292.45	15.9	15.4	20.9	11.4	10	12	0.8	0	0.8	0
292.45	17.4551	25.3274	15.229	4.59111	7.95644	7.95644	0	0	0.01816	0							295.6	16	15.5	21	11.4	10.1	12.1	0.9	0	0.9	0
295.6	17.5656	25.4352	15.3496	4.66034	8.05033	8.05033	0	0	0.01319	0							298.75	16.1	15.7	21.2	11.5	10.3	12.2	0.9	0	0.9	0
298.75	17.6763	25.5486	15.4653	4.72007	8.15841	8.15841	0	0	0	0							301.9	16.3	15.8	21.3	11.6	10.4	12.3	1	0	0.9	0
301.9	17.7894	25.6695	15.5709	4.77452	8.26842	8.26842	0	0	0	0							305.05	16.4	15.9	21.4	11.6	10.6	12.5	1.1	0	1	0
305.05	17.9019	25.7999	15.6715	4.82673	8.36808	8.36808	0	0	0	0							308.2	16.5	16	21.6	11.6	10.7	12.6	1.1	0	1	0
308.2	18.0095	25.9287	15.7693	4.87922	8.46175	8.46175	0	0	0	0							311.35	16.6	16.1	21.7	11.7	10.8	12.7	1.2	0	1.1	0
311.35	18.1194	26.0564	15.8638	4.93262	8.5463	8.5463	0	0	0	0							314.5	16.7	16.2	21.9	11.7	10.9	12.9	1.3	0	1.2	0
314.5	18.2302	26.1809	15.959	4.99449	8.6157	8.6157	0	0	0	0							317.65	16.8	16.4	22	11.7	11	13	1.3	0	1.3	0
317.65	18.34	26.3045	16.0627	5.06506	8.6681	8.6681	0	0	0	0							320.8	16.9	16.5	22.1	11.9	11.1	13.1	1.3	0	1.4	0
320.8	18.4436	26.4327	16.1665	5.12659	8.7196	8.7196	0	0.01265	0	0							323.95	17	16.6	22.3	12.3	11.3	13.2	1.4	0	1.5	0
323.95	18.5473	26.5578	16.2674	5.17361	8.7816	8.7816	0	0.033	0	0							327.1	17.2	16.7	22.4	12.5	11.4	13.4	1.4	0	1.6	0
327.1	18.6523	26.6741	16.3699	5.22312	8.8456	8.8456	0	0.05076	0.04704	0							330.25	17.3	16.8	22.5	12.8	11.5	13.5	1.5	0	1.7	0
330.25	18.7557	26.7881	16.4735	5.27163	8.9052	8.9052	0	0.07797	0.11328	0							333.4	17.4	16.9	22.6	12.8	11.7	13.6	1.5	0	1.8	0
333.4	18.8565	26.8889	16.57	5.31459	8.9836	8.9836	0	0.10794	0.16795	0							336.55	17.5	17	22.7	12.4	11.8	13.7	1.5	0	1.9	0
336.55	18.9518	26.9904	16.6617	5.3544	9.0715	9.0715	0	0.13399	0.21687	0							339.7	17.6	17.1	22.8	12.1	11.9	13.9	1.6	0	2	0
339.7	19.0415	27.0965	16.7567	5.4073	9.1692	9.1692	0	0.17262	0.26707	0							342.85	17.7	17.2	22.9	12	12	14	1.6	0	2.1	0
342.85	19.1237	27.1979	16.8538	5.46874	9.2944	9.2944	0	0.2176	0.30551	0							346	17.8	17.3	23.1	12	12.1	14.1	1.6	0	2.2	0
346	19.1999	27.2957	16.9434	5.52774	9.4151	9.4151	0	0.25164	0.35149	0							349.15	17.9	17.4	23.2	12	12.2	14.3	1.7	0	2.3	0
349.15	19.2814	27.3977	17.0307	5.58365	9.5342	9.5342	0	0.28514	0.4057	0							352.3	18	17.5	23.3	12.3	12.3	14.4	1.7	0	2.4	0
352.3	19.372	27.5034	17.1141	5.63826	9.6389	9.6389	0	0.31956	0.46219	0							355.45	18.1	17.6	23.4	12.5	12.4	14.6	1.8	0	2.5	0
355.45	19.4668	27.6063	17.2014	5.68495	9.7304	9.7304	0	0.35825	0.50558	0							358.6	18.2	17.7	23.5	12.7	12.5	14.7	1.9	0	2.6	0
358.6	19.566	27.7012	17.2858	5.71876	9.819	9.819	0	0.39556	0.53708	0							361.75	18.3	17.8	23.6	12.9	12.6	14.9	1.9	0	2.7	0
361.75	19.6673	27.7972	17.3769	5.75142	9.8937	9.8937	0	0.43142	0.55719	0							364.9	18.4	17.9	23.7	13	12.7	15	2	0	2.8	0
364.9	19.7683	27.8936	17.4731	5.78019	9.9648	9.9648	0	0.46775	0.54176	0							368.05	18.6	18	23.9	13	12.8	15.1	2	0	3	0
368.05	19.8646	27.9868	17.5636	5.80815	10.0372	10.0372	0	0.49429	0.53945	0							371.2	18.7	18.1	24	13	12.9	15.3	2.1	0	3	0
371.2	19.9543	28.0926	17.647	5.83772	10.1021	10.1021	0	0.51319	0.56237	0							374.35	18.8	18.2	24.1	12.9	13.1	15.4	2.2	0	3.1	0
374.35	20.0412	28.188	17.736	5.86868	10.1688	10.1688	0	0.53677	0.6091	0							377.5	19	18.3	24.2	12.9	13.2	15.5	2.2	0	3.2	0
377.5	20.1235	28.2754	17.8232	5.89806	10.2442	10.2442	0	0.56355	0.64365	0							380.65	19.1	18.4	24.3	12.9	13.4	15.6	2.3	0	3.3	0
380.65	20.2017	28.3705	17.9069	5.92894	10.3136	10.3136	0	0.58821	0.68093	0							383.8	19.2	18.5	24.4	13.1	13.5	15.7	2.4	0	3.3	0
383.8	20.284	28.4647	17.9976	5.96622	10.3806	10.3806	0	0.61862	0.72188	0							386.95	19.3	18.5	24.5	13.3	13.7	15.8	2.4	0	3.4	0
386.95	20.3732	28.5582	18.0965	6.01074	10.4505	10.4505	0	0.66107	0.7504	0							390.1	19.4	18.7	24.6	13.6	13.8	15.9	2.5	0	3.5	0
390.1	20.4644	28.6512	18.1889	6.05341	10.5238	10.5238	0	0.70827	0.73064	0							393.25	19.5	18.8	24.7	13.9	13.9	16	2.6	0	3.6	0
393.25	20.5539	28.7551	18.2808	6.09273	10.5957	10.5957	0	0.75195	0.69186	0							396.4	19.6	18.9	24.8	14	14	16.1	2.6	0	3.7	0
396.4	20.6447	28.8638	18.373	6.13687	10.6699	10.6699	0	0.79526	0.67752	0							399.55	19.7	19	24.9	13.8	14.1	16.2	2.6	0	3.8	0
399.55	20.7332	28.9626	18.4589	6.18122	10.7479	10.7479	0	0.83453	0.68725	0							402.7	19.8	19	25	13.4	14.2	16.3	2.7	0	4	0
402.7	20.8157	29.0618	18.5304	6.22074	10.8152	10.8152	0	0.87008	0.73276	0							405.85	19.8	19.1	25.1	13	14.2	16.4	2.7	0	4.1	0
405.85	20.8954	29.156	18.5989	6.26119	10.8742	10.8742	0	0.90247	0.79917	0							409	19.9	19.2	25.2	12.7	14.3	16.4	2.7	0	4.2	0
409	20.9758	29.2397	18.6659	6.30043	10.9304	10.9304	0	0.94208	0.86424	0							412.15	20	19.2	25.3	12.7	14.4	16.5	2.7	0	4.4	0
412.15	21.0539	29.3234	18.7258	6.33147	10.989	10.989	0	0.98722	0.92184	0							415.3	20.1	19.2	25.4	13.1	14.5	16.6	2.8	0	4.5	0
415.3	21.1315	29.4078	18.7955	6.36132	11.0509	11.0509	0	1.03296	0.97639	0							418.45	20.2	19.3	25.5	13.3	14.6	16.8	2.8	0	4.7	0
418.45	21.2129	29.4976	18.8617	6.39031	11.1149	11.1149	0	1.08061	1.02262	0							421.6	20.2	19.3	25.6	13.5	14.7	16.9	2.9	0.1	4.8	0
421.6	21.2991	29.595	18.9228	6.40857	11.1899	11.1899	0	1.12492	1.05229	0							424.75	20.3	19.4	25.7	13.6	14.8	16.9	2.9	0.1	4.9	0
424.75	21.3852	29.6927	18.9843	6.42227	11.2705	11.2705	0	1.15572	1.0604	0							427.9	20.4	19.5	25.8	13.7	14.8	17	3	0.1	5	0
427.9	21.4649	29.7904	19.0549	6.43953	11.3528	11.3528	0	1.18279	1.05097	0							431.05	20.5	19.6	25.8	13.8	14.9	17.1	3	0.1	5	0
431.05	21.5409	29.8815	19.1266	6.46742	11.4382	11.4382	0	1.21304	1.00398	0							434.2	20.6	19.7	25.9	13.9	15	17.2	3.1	0.2	5.1	0
434.2	21.6218	29.9662	19.1916	6.49308	11.5268	11.5268	0	1.24289	0.94178	0							437.35	20.7	19.8	26	14	15.1	17.2	3.1	0.2	5.1	0
437.35	21.7043	30.0529	19.2569	6.51954	11.6144	11.6144	0	1.26708	0.88201	0							440.5	20.7	19.9	26.1	14.2	15.1	17.3	3.2	0.2	5.2	0
440.5	21.7841	30.1393	19.3339	6.557	11.7032	11.7032	0.00574	1.29896	0.82333	0							443.65	20.8	20	26.2	14.3	15.2	17.4	3.2	0.3	5.2	0
443.65	21.8678	30.2197	19.4118	6.59306	11.7737	11.7737	0.00989	1.33865	0.80092	0							446.8	20.9	20	26.2	14.2	15.2	17.4	3.2	0.3	5.2	0
446.8	21.9485	30.2916	19.4886	6.61873	11.8443	11.8443	0.0014	1.37505	0.82996	0							449.95	21	20.1	26.3	14.1	15.3	17.5	3.2	0.3	5.3	0
449.95	22.0238	30.3612	19.5654	6.63571	11.9067	11.9067	0	1.40747	1.01077	0							453.1	21.1	20.2	26.4	14.1	15.3	17.6	3.3	0.4	5.3	0
453.1	22.104	30.4329	19.6464	6.64991	11.9484	11.9484	0	1.44235	1.18167	0							456.25	21.1	20.3	26.5	14.4	15.3	17.6	3.3	0.5	5.4	0
456.25	22.1862	30.4985	19.7235	6.66133	11.9924	11.9924	0.00141	1.47323	1.32294	0							459.4	21.2	20.3	26.6	14.5	15.4	17.7	3.3	0.5	5.4	0
459.4	22.2691	30.5652	19.7976	6.67731	12.0329	12.0329	0.01878	1.49975	1.43669	0							462.55	21.3	20.4	26.7	14.5	15.4	17.8	3.4	0.6	5.5	0
462.55	22.3469	30.6356	19.8796	6.70436	12.0698	12.0698	0.04332	1.53536	1.48754	0							465.7	21.4	20.4	26.8	14.5	15.5	17.8	3.4	0.6	5.5	0
465.7	22.4182	30.7108	19.9633	6.73216	12.1162	12.1162	0.06368	1.57598	1.43287	0							468.85	21.4	20.5	26.8	14.5	15.6	17.9	3.5	0.6	5.6	0
468.85	22.4902	30.7928	20.0462	6.76379	12.1772	12.1772	0.07685	1.61152	1.46502	0							472	21.5	20.6	26.9	14.5	15.6	18	3.6	0.6	5.7	0
472	22.5587	30.8858	20.1283	6.8035	12.2471	12.2471	0.07466	1.64722	1.52606	0							475.15	21.6	20.6	27	14.6	15.7	18.1	3.6	0.6	5.7	0
475.15	22.6196	30.9824	20.2093	6.8457	12.3131	12.3131	0.07019	1.68358	1.51282	0							478.3	21.6	20.7	27.1	14.9	15.8	18.1	3.7	0.7	5.8	0
478.3	22.6777	31.0755	20.2861	6.88201	12.3883	12.3883	0.07235	1.72478	1.57536	0							481.45	21.7	20.7	27.2	15.2	15.8	18.2	3.7	0.7	5.9	0
481.45	22.7326	31.1637	20.3586	6.91093	12.4749	12.4749	0.08051	1.75626	1.67907	0							484.6	21.8	20.8	27.2	15.6	15.9	18.2	3.7	0.7	5.9	0
484.6	22.787	31.2523	20.4285	6.93537	12.5615	12.5615	0.09928	1.7786	1.79014	0							487.75	21.8	20.9	27.3	15.9	15.9	18.3	3.8	0.8	6	0
487.75	22.8459	31.3392	20.4947	6.96049	12.645	12.645	0.13403	1.80508	1.87816	0							490.9	21.9	20.9	27.4	16.2	16	18.3	3.8	0.8	6.1	0
490.9	22.9114	31.4166	20.5539	6.986	12.7304	12.7304	0.17096	1.83011	1.91836	0							494.05	22	21	27.5	16.3	16	18.4	3.8	0.9	6.1	0
494.05	22.9794	31.4885	20.6101	7.00919	12.8	12.8	0.20452	1.86189	1.88472	0							497.2	22	21.1	27.5	16.2	16	18.4	3.9	0.9	6.2	0
497.2	23.0465	31.5556	20.6714	7.03235	12.8571	12.8571	0.23858	1.90027	1.80085	0							500.35	22.1	21.2	27.6	16	16.1	18.5	3.9	1	6.3	0
500.35	23.1138	31.6176	20.733	7.05307	12.9171	12.9171	0.26857	1.93719	1.73361	0							503.5	22.2	21.2	27.7	15.9	16.2	18.6	3.9	1	6.3	0
503.5	23.1828	31.6794	20.7917	7.07219	12.9753	12.9753	0.28826	1.96729	1.68054	0							506.65	22.2	21.3	27.8	15.8	16.2	18.7	3.9	1.1	6.4	0
506.65	23.2509	31.7508	20.8564	7.09588	13.0286	13.0286	0.30405	1.98997	1.68332	0							509.8	22.3	21.4	27.8	15.8	16.4	18.7	3.9	1.1	6.4	0
509.8	23.3164	31.825	20.9287	7.11925	13.0959	13.0959	0.32733	2.01551	1.78083	0							512.95	22.3	21.5	27.9	15.9	16.5	18.8	4	1.1	6.5	0
512.95	23.3825	31.8919	21.0049	7.1387	13.1748	13.1748	0.352	2.03842	1.91081	0							516.1	22.4	21.6	28	15.9	16.6	18.9	4	1.1	6.6	0
516.1	23.4473	31.9587	21.0811	7.15731	13.2529	13.2529	0.38129	2.05375	2.04057	0							519.25	22.5	21.6	28.1	16	16.7	19	4	1.1	6.7	0
519.25	23.5089	32.0324	21.1553	7.18071	13.3163	13.3163	0.41476	2.06782	2.17931	0							522.4	22.5	21.7	28.2	16.1	16.8	19	4.1	1.1	6.8	0
522.4	23.5709	32.1096	21.2292	7.21583	13.3738	13.3738	0.45313	2.08973	2.27648	0							525.55	22.6	21.8	28.2	16.3	16.9	19.1	4.1	1.1	6.9	0
525.55	23.6372	32.1935	21.2983	7.24757	13.4175	13.4175	0.47305	2.11538	2.30943	0							528.7	22.6	21.9	28.3	16.4	17	19.1	4.2	1.1	7	0
528.7	23.7046	32.2767	21.3695	7.28186	13.456	13.456	0.46921	2.14713	2.26655	0							531.85	22.7	22	28.4	16.6	17.1	19.2	4.2	1.1	7	0
531.85	23.7708	32.3607	21.445	7.31803	13.5016	13.5016	0.43317	2.18318	2.20559	0							535	22.8	22.1	28.5	16.7	17.1	19.2	4.3	1.1	7.1	0
535	23.8361	32.4557	21.5096	7.35402	13.5653	13.5653	0.40549	2.21523	2.13922	0							538.15	22.8	22.2	28.6	16.8	17.2	19.3	4.3	1.2	7.1	0
538.15	23.9034	32.5456	21.5712	7.39084	13.6457	13.6457	0.37395	2.23874	2.06321	0							541.3	22.9	22.3	28.8	16.9	17.2	19.3	4.3	1.2	7.1	0
541.3	23.9724	32.6335	21.6367	7.43104	13.731	13.731	0.35161	2.2654	2.0323	0							544.45	22.9	22.4	28.9	17	17.2	19.4	4.4	1.2	7.1	0
544.45	24.0373	32.7111	21.7019	7.47473	13.8108	13.8108	0.36095	2.29908	2.07955	0							547.6	23	22.4	29	17	17.2	19.4	4.4	1.3	7.1	0
547.6	24.0993	32.772	21.7629	7.51204	13.8914	13.8914	0.4121	2.32476	2.20241	0							550.75	23	22.5	29.1	17	17.2	19.5	4.5	1.3	7.1	0
550.75	24.1585	32.8334	21.8199	7.53962	13.9529	13.9529	0.45484	2.34972	2.41965	0							553.9	23.1	22.6	29.2	17	17.2	19.5	4.5	1.3	7.1	0
553.9	24.212	32.9024	21.8769	7.57144	13.9947	13.9947	0.49362	2.38207	2.54278	0							557.05	23.2	22.6	29.3	17.2	17.2	19.6	4.5	1.4	7.1	0
557.05	24.2665	32.9622	21.9303	7.60016	14.0216	14.0216	0.51853	2.41885	2.63136	0							560.2	23.2	22.7	29.3	17.3	17.3	19.6	4.6	1.4	7.2	0
560.2	24.3272	33.0225	21.9833	7.61817	14.0478	14.0478	0.52083	2.4519	2.69389	0							563.35	23.3	22.8	29.4	17.4	17.3	19.7	4.6	1.4	7.2	0
563.35	24.3881	33.0875	22.0396	7.6402	14.0776	14.0776	0.54555	2.48543	2.72959	0							566.5	23.3	22.9	29.4	17.6	17.3	19.7	4.7	1.4	7.3	0
566.5	24.4434	33.1535	22.0946	7.66895	14.1155	14.1155	0.57459	2.51546	2.75873	0							569.65	23.4	22.9	29.5	17.7	17.4	19.8	4.7	1.5	7.3	0
569.65	24.4966	33.2186	22.1439	7.69788	14.1646	14.1646	0.5907	2.54318	2.77125	0							572.8	23.4	23	29.5	17.5	17.5	19.8	4.7	1.5	7.3	0
572.8	24.5575	33.2843	22.1955	7.73025	14.2221	14.2221	0.59023	2.56549	2.81438	0							575.95	23.5	23	29.5	17.2	17.5	19.9	4.8	1.6	7.2	0
575.95	24.6263	33.3486	22.2514	7.77347	14.2818	14.2818	0.6129	2.58512	2.84627	0							579.1	23.5	23.1	29.6	17.1	17.7	19.9	4.8	1.6	7.1	0
579.1	24.6879	33.4093	22.3113	7.81266	14.3508	14.3508	0.631	2.60436	2.85541	0							582.25	23.6	23.1	29.6	17	17.8	20	4.8	1.6	7	0
582.25	24.7473	33.4717	22.371	7.84363	14.4239	14.4239	0.63698	2.61936	2.78716	0							585.4	23.7	23.2	29.7	17	18	20.1	4.9	1.7	6.8	0
585.4	24.8071	33.5395	22.4291	7.87862	14.4905	14.4905	0.63696	2.63409	2.66338	0							588.55	23.7	23.2	29.7	17.1	18.1	20.1	4.9	1.7	6.8	0
588.55	24.8642	33.607	22.4899	7.91649	14.563	14.563	0.64541	2.65357	2.57138	0							591.7	23.7	23.3	29.8	17.2	18.2	20.2	5	1.8	7	0
591.7	24.9184	33.6673	22.5471	7.94412	14.6352	14.6352	0.6585	2.67165	2.45506	0							594.85	23.8	23.3	29.8	17.4	18.3	20.2	5	1.8	7.3	0
594.85	24.9754	33.7256	22.5995	7.96433	14.7052	14.7052	0.67018	2.68817	2.3571	0							598	23.8	23.4	29.9	17.6	18.3	20.3	5	1.9	7.5	0
598	25.0319	33.7818	22.6489	7.9802	14.7679	14.7679	0.68351	2.7078	2.35095	0							601.15	23.9	23.5	29.9	17.7	18.4	20.3	5	1.9	7.6	0
601.15	25.0834	33.8334	22.6974	7.99475	14.8205	14.8205	0.70329	2.73515	2.48003	0							604.3	23.9	23.5	30	17.9	18.4	20.4	5.1	1.9	7.6	0
604.3	25.131	33.8873	22.7446	8.00891	14.8728	14.8728	0.72232	2.76398	2.61828	0							607.45	24	23.6	30.1	18.1	18.4	20.5	5.1	2	7.4	0
607.45	25.1826	33.9543	22.7937	8.03081	14.9098	14.9098	0.74013	2.7952	2.67309	0							610.6	24	23.6	30.2	18.2	18.5	20.5	5.1	2	7.3	0
610.6	25.2414	34.0227	22.8486	8.05874	14.9442	14.9442	0.76085	2.82844	2.65581	0							613.75	24	23.6	30.2	18.3	18.5	20.6	5.1	2.1	7.2	0
613.75	25.3014	34.09	22.9067	8.08531	14.9815	14.9815	0.77549	2.86176	2.63073	0							616.9	24.1	23.7	30.3	18.4	18.6	20.6	5.2	2.1	7.1	0
616.9	25.3619	34.156	22.957	8.10998	15.0183	15.0183	0.76495	2.88901	2.65645	0							620.05	24.2	23.7	30.4	18.5	18.6	20.6	5.2	2.2	7.1	0
620.05	25.4249	34.2229	23.0104	8.14597	15.0613	15.0613	0.75145	2.91006	2.78148	0							623.2	24.2	23.8	30.4	18.6	18.7	20.7	5.2	2.2	7.2	0
623.2	25.4868	34.2919	23.0665	8.18336	15.1125	15.1125	0.74696	2.92831	2.86736	0							626.35	24.3	23.8	30.5	18.7	18.7	20.7	5.3	2.2	7.2	0
626.35	25.5456	34.3532	23.1153	8.2117	15.1798	15.1798	0.74733	2.94565	2.9129	0							629.5	24.3	23.9	30.5	18.7	18.7	20.7	5.3	2.2	7.3	0
629.5	25.6014	34.4063	23.1601	8.23658	15.249	15.249	0.75199	2.96108	2.91645	0							632.65	24.4	24	30.6	18.7	18.9	20.8	5.4	2.2	7.4	0
632.65	25.6594	34.4678	23.2045	8.25588	15.3147	15.3147	0.78086	2.97944	2.88805	0							635.8	24.4	24	30.6	18.6	19	20.8	5.4	2.2	7.5	0
635.8	25.7122	34.5346	23.2491	8.26303	15.3855	15.3855	0.79844	3.00248	2.85795	0							638.95	24.5	24.1	30.7	18.5	19.3	20.9	5.4	2.2	7.6	0
638.95	25.756	34.6011	23.2872	8.27728	15.4491	15.4491	0.82054	3.02179	2.88596	0							642.1	24.5	24.2	30.7	18.4	19.5	20.9	5.5	2.2	7.7	0
642.1	25.7981	34.6702	23.3343	8.29295	15.49	15.49	0.84972	3.0437	3.00352	0							645.25	24.6	24.2	30.8	18.3	19.8	21	5.5	2.2	7.7	0
645.25	25.8449	34.7295	23.3835	8.30819	15.5189	15.5189	0.87924	3.0746	3.08675	0							648.4	24.6	24.3	30.8	18.3	19.9	21	5.5	2.2	7.7	0
648.4	25.8908	34.7729	23.4282	8.31743	15.5411	15.5411	0.89691	3.10291	3.1383	0							651.55	24.7	24.3	30.9	18.4	20	21	5.5	2.2	7.6	0
651.55	25.9281	34.8268	23.4725	8.32823	15.563	15.563	0.90581	3.13007	3.15978	0							654.7	24.7	24.4	30.9	18.5	19.9	21.1	5.6	2.3	7.5	0
654.7	25.9655	34.8797	23.5287	8.35026	15.5841	15.5841	0.91692	3.15194	3.17443	0							657.85	24.7	24.4	31	18.6	19.8	21.1	5.6	2.3	7.5	0
657.85	26.009	34.9309	23.5811	8.37282	15.6132	15.6132	0.9377	3.17665	3.1907	0							661	24.8	24.4	31.1	18.6	19.8	21.2	5.6	2.3	7.5	0
661	26.0485	34.9754	23.6251	8.39254	15.66	15.66	0.95176	3.19792	3.26483	0							664.15	24.9	24.5	31.1	18.6	19.8	21.3	5.7	2.4	7.4	0
664.15	26.0896	35.024	23.6605	8.41627	15.7135	15.7135	0.94906	3.20916	3.33233	0							667.3	24.9	24.5	31.2	18.7	19.9	21.3	5.7	2.4	7.4	0
667.3	26.1413	35.0813	23.7018	8.44627	15.7728	15.7728	0.95333	3.22594	3.39385	0							670.45	25	24.5	31.2	18.7	20	21.4	5.7	2.4	7.4	0
670.45	26.1936	35.141	23.7433	8.47921	15.8301	15.8301	0.96016	3.24718	3.40273	0							673.6	25	24.5	31.3	18.8	20.1	21.4	5.8	2.4	7.4	0
673.6	26.2391	35.2	23.7863	8.5144	15.8799	15.8799	0.97814	3.27043	3.31982	0							676.75	25.1	24.5	31.4	18.9	20.2	21.5	5.8	2.4	7.5	0
676.75	26.2846	35.2565	23.8368	8.5538	15.9263	15.9263	1.00724	3.30346	3.18274	0							679.9	25.1	24.6	31.4	18.9	20.2	21.5	5.9	2.5	7.8	0
679.9	26.3341	35.3075	23.8814	8.5898	15.9778	15.9778	1.02947	3.34011	3.07156	0							683.05	25.2	24.6	31.5	19	20.3	21.5	5.9	2.5	8.1	0
683.05	26.3813	35.3582	23.9264	8.6188	16.0375	16.0375	1.0414	3.37167	2.98742	0							686.2	25.2	24.7	31.5	19.1	20.3	21.6	5.9	2.5	8.2	0
686.2	26.4237	35.4115	23.9765	8.6447	16.0978	16.0978	1.04342	3.40142	2.99901	0							689.35	25.3	24.8	31.6	19.1	20.4	21.6	5.9	2.5	8.4	0
689.35	26.4744	35.467	24.0285	8.6733	16.1588	16.1588	1.05258	3.43349	3.12977	0							692.5	25.3	24.8	31.6	19.2	20.5	21.7	5.9	2.6	8.6	0
692.5	26.5158	35.5171	24.0774	8.6971	16.2225	16.2225	1.06498	3.46496	3.26893	0							695.65	25.4	24.9	31.7	19.2	20.6	21.7	6	2.6	8.8	0
695.65	26.5535	35.565	24.1242	8.7156	16.2778	16.2778	1.07328	3.48765	3.34857	0							698.8	25.4	24.9	31.8	19.2	20.7	21.7	6	2.7	8.9	0
698.8	26.5986	35.6173	24.1746	8.7322	16.3197	16.3197	1.08271	3.50696	3.38459	0							701.95	25.4	25	31.9	19.3	20.9	21.8	6	2.7	9	0
701.95	26.649	35.6687	24.229	8.741	16.3594	16.3594	1.10228	3.53263	3.39276	0							705.1	25.4	25	32	19.3	21	21.8	6	2.8	9	0
705.1	26.6977	35.7193	24.2771	8.7451	16.3944	16.3944	1.13653	3.54935	3.37594	0							708.25	25.5	25.1	32.1	19.3	21.1	21.8	6.1	2.8	9.1	0
708.25	26.7438	35.7728	24.3243	8.7456	16.426	16.426	1.17705	3.55998	3.34782	0							711.4	25.5	25.1	32.2	19.4	21.2	21.8	6.1	2.8	9.1	0
711.4	26.786	35.8255	24.3739	8.752	16.459	16.459	1.21104	3.56798	3.30993	0							714.55	25.6	25.2	32.3	19.4	21.3	21.9	6.2	2.9	9.2	0
714.55	26.8348	35.871	24.4179	8.7619	16.4986	16.4986	1.23838	3.57516	3.28472	0							717.7	25.6	25.2	32.3	19.4	21.4	21.9	6.2	2.9	9.3	0
717.7	26.8918	35.9134	24.4587	8.777	16.5417	16.5417	1.24595	3.58168	3.26616	0							720.85	25.7	25.3	32.3	19.4	21.4	21.9	6.2	2.9	9.4	0
720.85	26.9474	35.9665	24.5042	8.8004	16.5844	16.5844	1.23117	3.59475	3.27565	0							724	25.7	25.3	32.4	19.5	21.5	21.9	6.3	2.9	9.5	0
724	26.9998	36.0217	24.5502	8.8346	16.6315	16.6315	1.214	3.62039	3.29483	0							727.15	25.8	25.3	32.4	19.6	21.6	22	6.3	2.9	9.7	0
727.15	27.0526	36.0645	24.5906	8.8591	16.6815	16.6815	1.19422	3.65176	3.32048	0							730.3	25.8	25.4	32.4	19.6	21.7	22	6.3	2.9	9.8	0
730.3	27.1066	36.1128	24.6287	8.8808	16.7244	16.7244	1.17655	3.68069	3.35001	0							733.45	25.9	25.4	32.5	19.7	21.7	22	6.3	2.9	10	0
733.45	27.1582	36.1734	24.674	8.9059	16.7696	16.7696	1.17157	3.71342	3.34939	0							736.6	25.9	25.5	32.5	19.7	21.8	22.1	6.4	2.9	10	0
736.6	27.2095	36.2417	24.7174	8.9225	16.8191	16.8191	1.18715	3.74268	3.41817	0							739.75	26	25.5	32.5	19.8	21.8	22.1	6.4	3	9.9	0
739.75	27.2614	36.3001	24.752	8.9279	16.8658	16.8658	1.2148	3.7605	3.4879	0							742.9	26	25.5	32.5	19.8	21.7	22.1	6.4	3	9.8	0
742.9	27.3054	36.3402	24.7938	8.9329	16.908	16.908	1.25299	3.77885	3.47124	0							746.05	26	25.6	32.6	19.8	21.7	22.2	6.4	3.1	9.7	0
746.05	27.3401	36.3911	24.8405	8.9401	16.9452	16.9452	1.29706	3.79702	3.51911	0							749.2	26.1	25.6	32.6	19.8	21.7	22.2	6.5	3.1	9.6	0
749.2	27.3825	36.444	24.8885	8.9455	16.98	16.98	1.33539	3.81605	3.56261	0							752.35	26.1	25.7	32.7	19.9	21.6	22.2	6.5	3.2	9.6	0
752.35	27.4264	36.5078	24.9366	8.9518	17.0104	17.0104	1.35969	3.83035	3.57194	0							755.5	26.2	25.7	32.7	19.9	21.6	22.3	6.5	3.2	9.8	0
755.5	27.4646	36.5704	24.9825	8.9627	17.037	17.037	1.3768	3.85059	3.53205	0							758.65	26.2	25.7	32.8	20	21.5	22.3	6.5	3.2	10	0
758.65	27.5029	36.6249	25.0247	8.9787	17.0702	17.0702	1.38445	3.8758	3.5015	0							761.8	26.3	25.8	32.8	20.1	21.5	22.3	6.6	3.2	10.1	0
761.8	27.5459	36.6808	25.0662	8.9959	17.1113	17.1113	1.38715	3.89004	3.47795	0							764.95	26.3	25.8	32.9	20.1	21.5	22.3	6.6	3.3	10.2	0
764.95	27.5893	36.7362	25.1108	9.0221	17.1517	17.1517	1.38886	3.90587	3.48679	0							768.1	26.4	25.9	32.9	20.2	21.5	22.3	6.6	3.3	10.3	0
768.1	27.6345	36.7852	25.167	9.0492	17.1967	17.1967	1.39261	3.927	3.52267	0							771.25	26.4	25.9	33	20.2	21.6	22.4	6.7	3.3	10.3	0
771.25	27.6791	36.8302	25.223	9.0755	17.2521	17.2521	1.40246	3.94934	3.57494	0							774.4	26.5	25.9	33	20.2	21.6	22.4	6.7	3.4	10.3	0
774.4	27.7204	36.8722	25.2784	9.1002	17.3112	17.3112	1.4167	3.97397	3.6314	0							777.55	26.5	26	33.1	20.3	21.7	22.4	6.7	3.4	10.3	0
777.55	27.7623	36.9172	25.3377	9.1245	17.3725	17.3725	1.42711	3.99831	3.70236	0							780.7	26.6	26	33.1	20.3	21.7	22.5	6.8	3.4	10.3	0
780.7	27.8047	36.9676	25.3959	9.1504	17.4392	17.4392	1.43801	4.02465	3.76792	0							783.85	26.6	26	33.2	20.3	21.7	22.5	6.8	3.4	10.3	0
783.85	27.8524	37.0234	25.4469	9.1732	17.509	17.509	1.44616	4.04405	3.81694	0							787	26.7	26.1	33.2	20.4	21.7	22.5	6.9	3.5	10.3	0
787	27.91	37.0874	25.487	9.1943	17.572	17.572	1.44828	4.0635	3.83301	0							790.15	26.7	26.1	33.3	20.4	21.8	22.5	6.9	3.5	10.4	0
790.15	27.9671	37.1506	25.52	9.2139	17.6269	17.6269	1.45216	4.08912	3.81471	0							793.3	26.7	26.1	33.3	20.4	21.8	22.6	7	3.5	10.4	0
793.3	28.0201	37.2066	25.5471	9.229	17.6762	17.6762	1.46371	4.10952	3.75874	0							796.45	26.8	26.2	33.4	20.4	21.8	22.6	7	3.6	10.4	0
796.45	28.0729	37.255	25.5725	9.2481	17.7107	17.7107	1.48175	4.12591	3.68506	0							799.6	26.8	26.2	33.4	20.5	21.9	22.7	7	3.6	10.4	0
799.6	28.1233	37.2963	25.6023	9.2796	17.7355	17.7355	1.5035	4.14589	3.62206	0							802.75	26.8	26.2	33.5	20.5	22	22.7	7.1	3.6	10.4	0
802.75	28.1727	37.3358	25.6328	9.3094	17.7613	17.7613	1.54695	4.17326	3.57415	0							805.9	26.9	26.3	33.5	20.5	22	22.8	7.1	3.7	10.3	0
805.9	28.2207	37.3743	25.6629	9.3378	17.7928	17.7928	1.58807	4.19865	3.55413	0							809.05	26.9	26.3	33.6	20.7	22.1	22.8	7.1	3.7	10.3	0
809.05	28.2632	37.4108	25.6946	9.3568	17.8282	17.8282	1.62394	4.21693	3.60042	0							812.2	26.9	26.3	33.7	20.8	22.1	22.8	7.2	3.7	10.3	0
812.2	28.2994	37.452	25.7382	9.3765	17.8686	17.8686	1.66051	4.22769	3.65648	0							815.35	27	26.4	33.7	21	22.1	22.8	7.2	3.7	10.3	0
815.35	28.3314	37.4904	25.7879	9.3934	17.917	17.917	1.70255	4.24166	3.71945	0							818.5	27	26.4	33.8	21.1	22.1	22.9	7.2	3.8	10.3	0
818.5	28.366	37.538	25.8314	9.4094	17.9672	17.9672	1.73348	4.25416	3.76364	0							821.65	27.1	26.4	33.8	21.2	22.1	22.9	7.3	3.8	10.3	0
821.65	28.4106	37.5893	25.8744	9.4266	18.0198	18.0198	1.73678	4.27663	3.73924	0							824.8	27.1	26.5	33.9	21.2	22.1	22.9	7.3	3.8	10.3	0
824.8	28.4554	37.633	25.9212	9.4414	18.079	18.079	1.72718	4.30051	3.73143	0							827.95	27.2	26.5	33.9	21.2	22.1	22.9	7.3	3.9	10.3	0
827.95	28.4976	37.6773	25.9627	9.4472	18.1404	18.1404	1.7184	4.31572	3.71961	0							831.1	27.2	26.5	33.9	21.2	22.2	22.9	7.3	3.9	10.3	0
831.1	28.5408	37.7298	25.9965	9.4545	18.199	18.199	1.7142	4.33428	3.71707	0							834.25	27.2	26.5	34	21.2	22.2	22.9	7.4	4	10.3	0
834.25	28.5843	37.7902	26.0286	9.4659	18.2497	18.2497	1.72309	4.35398	3.78895	0							837.4	27.3	26.5	34	21.3	22.3	22.9	7.4	4	10.3	0
837.4	28.628	37.8474	26.0553	9.4756	18.2939	18.2939	1.75451	4.3833	4.00334	0							840.55	27.3	26.5	34.1	21.3	22.3	22.9	7.4	4	10.3	0
840.55	28.6694	37.9008	26.0825	9.4742	18.34	18.34	1.80012	4.40855	4.19535	0							843.7	27.4	26.5	34.1	21.3	22.3	22.9	7.4	4.1	10.3	0
843.7	28.706	37.9503	26.116	9.4754	18.3812	18.3812	1.84133	4.42495	4.42155	0							846.85	27.4	26.6	34.2	21.4	22.3	23	7.5	4.1	10.4	0
846.85	28.7373	37.9993	26.1609	9.4819	18.4175	18.4175	1.88585	4.4485	4.58921	0							850	27.5	26.6	34.3	21.4	22.3	23	7.5	4.1	10.4	0
850	28.759	38.0428	26.207	9.4872	18.4552	18.4552	1.92539	4.4778	4.65282	0							853.15	27.5	26.6	34.3	21.4	22.3	23	7.5	4.2	10.5	0
853.15	28.7847	38.0805	26.2484	9.4989	18.4901	18.4901	1.95146	4.50245	4.61538	0							856.3	27.5	26.7	34.4	21.4	22.3	23	7.6	4.2	10.6	0
856.3	28.8188	38.1183	26.2907	9.5241	18.5209	18.5209	1.97177	4.52709	4.51825	0							859.45	27.6	26.7	34.4	21.4	22.4	23	7.6	4.2	10.7	0
859.45	28.8516	38.1596	26.3356	9.556	18.5508	18.5508	1.98416	4.54754	4.4556	0							862.6	27.6	26.8	34.5	21.3	22.5	23	7.6	4.2	10.8	0
862.6	28.8837	38.209	26.375	9.5856	18.5789	18.5789	1.98049	4.55999	4.37416	0							865.75	27.6	26.8	34.5	21.3	22.6	23	7.6	4.3	10.9	0
865.75	28.917	38.2636	26.4054	9.6179	18.6025	18.6025	1.95875	4.56843	4.28755	0							868.9	27.7	26.9	34.6	21.3	22.7	23	7.7	4.3	11	0
868.9	28.9525	38.3195	26.4333	9.6545	18.6256	18.6256	1.93584	4.5838	4.21529	0							872.05	27.7	26.9	34.6	21.4	22.8	23	7.7	4.3	11.1	0
872.05	28.9905	38.3669	26.4667	9.6869	18.6608	18.6608	1.91706	4.60641	4.16086	0							875.2	27.7	26.9	34.6	21.4	22.8	23	7.7	4.3	11.1	0
875.2	29.0262	38.4055	26.507	9.7106	18.7136	18.7136	1.88952	4.62184	4.09437	0							878.35	27.8	26.9	34.7	21.5	22.9	23	7.8	4.4	11.2	0
878.35	29.0599	38.4495	26.5526	9.733	18.7766	18.7766	1.86646	4.64403	4.04376	0							881.5	27.8	27	34.7	21.5	23	23	7.8	4.4	11.2	0
881.5	29.0926	38.492	26.5931	9.7492	18.8424	18.8424	1.85706	4.67352	4.05054	0							884.65	27.9	27	34.7	21.5	23.1	23	7.8	4.4	11.2	0
884.65	29.1193	38.5297	26.6269	9.7575	18.9148	18.9148	1.86666	4.70089	4.13995	0							887.8	27.9	27	34.8	21.5	23.2	23	7.9	4.4	11.2	0
887.8	29.1483	38.5734	26.6621	9.7655	18.9855	18.9855	1.88267	4.72518	4.26162	0							890.95	27.9	27	34.8	21.6	23.2	23	7.9	4.5	11.2	0
890.95	29.1834	38.6195	26.7059	9.7714	19.0476	19.0476	1.89189	4.74375	4.34445	0							894.1	27.9	27.1	34.9	21.6	23.1	23.1	7.9	4.5	11.2	0
894.1	29.2214	38.6665	26.7516	9.7718	19.0999	19.0999	1.89773	4.76052	4.36907	0							897.25	28	27.1	34.9	21.6	23	23.1	7.9	4.5	11.2	0
897.25	29.2572	38.7131	26.7889	9.7695	19.1405	19.1405	1.90129	4.77353	4.34726	0							900.4	28	27.1	34.9	21.7	22.9	23.1	7.9	4.5	11.2	0
900.4	29.2916	38.7612	26.8257	9.777	19.1767	19.1767	1.90935	4.78357	4.35004	0							903.55	28	27.2	35	21.7	22.8	23.1	8	4.5	11.2	0
903.55	29.3305	38.8042	26.8622	9.785	19.2249	19.2249	1.9156	4.79669	4.40086	0							906.7	28	27.2	35	21.7	22.7	23.1	8	4.6	11.2	0
906.7	29.3703	38.8388	26.8969	9.7915	19.278	19.278	1.91045	4.80844	4.47375	0							909.85	28.1	27.2	35.1	21.7	22.6	23.1	8	4.6	11.3	0
909.85	29.4056	38.8747	26.9359	9.8011	19.3258	19.3258	1.90271	4.81936	4.51796	0							913	28.1	27.2	35.1	21.8	22.5	23.1	8.1	4.7	11.3	0
913	29.4413	38.9242	26.9774	9.822	19.362	19.362	1.91041	4.84016	4.55824	0							916.15	28.1	27.3	35.2	21.8	22.5	23.1	8.1	4.7	11.3	0
916.15	29.48	38.9862	27.014	9.8334	19.3976	19.3976	1.93696	4.8649	4.53919	0							919.3	28.2	27.3	35.2	21.8	22.5	23.2	8.1	4.7	11.2	0
919.3	29.5176	39.0516	27.0454	9.841	19.4271	19.4271	1.95256	4.88891	4.46236	0							922.45	28.2	27.3	35.2	21.9	22.5	23.2	8.1	4.7	11.2	0
922.45	29.5555	39.1171	27.0805	9.8588	19.4585	19.4585	1.96384	4.90541	4.34893	0							925.6	28.2	27.3	35.3	21.9	22.5	23.2	8.2	4.8	11.2	0
925.6	29.5946	39.184	27.1192	9.8809	19.4912	19.4912	1.97125	4.92823	4.27742	0							928.75	28.3	27.3	35.3	21.9	22.6	23.1	8.2	4.8	11.2	0
928.75	29.6329	39.2447	27.1568	9.8979	19.5223	19.5223	1.98037	4.95185	4.20894	0							931.9	28.3	27.3	35.3	22	22.6	23.1	8.2	4.8	11.1	0
931.9	29.6685	39.2906	27.1904	9.9107	19.5537	19.5537	1.96295	4.96939	4.19389	0							935.05	28.3	27.4	35.4	22	22.7	23.2	8.2	4.9	11.1	0
935.05	29.7034	39.3203	27.2265	9.9198	19.5848	19.5848	1.94239	4.99096	4.26674	0							938.2	28.4	27.4	35.4	22	22.7	23.2	8.2	5	11.1	0
938.2	29.7407	39.3456	27.2595	9.9298	19.6282	19.6282	1.92597	5.01267	4.30419	0							941.35	28.4	27.5	35.5	22	22.8	23.2	8.3	5	11.2	0
941.35	29.7807	39.374	27.2888	9.9368	19.6795	19.6795	1.91211	5.03426	4.29834	0							944.5	28.4	27.5	35.5	22	22.9	23.2	8.3	5.1	11.2	0
944.5	29.8164	39.4079	27.322	9.9521	19.7278	19.7278	1.9193	5.05578	4.23838	0							947.65	28.5	27.5	35.6	22	22.9	23.2	8.3	5.1	11.2	0
947.65	29.8472	39.4508	27.3567	9.9782	19.777	19.777	1.94492	5.07899	4.18957	0							950.8	28.5	27.5	35.6	22.1	22.9	23.2	8.3	5.1	11.3	0
950.8	29.8798	39.5036	27.3872	10.0068	19.8274	19.8274	1.9816	5.09914	4.14324	0							953.95	28.5	27.6	35.7	22.2	23	23.2	8.3	5.2	11.3	0
953.95	29.9137	39.5516	27.413	10.0358	19.8742	19.8742	2.01838	5.11716	4.10225	0							957.1	28.6	27.6	35.7	22.3	23	23.2	8.4	5.2	11.3	0
957.1	29.9475	39.5971	27.4421	10.0657	19.9102	19.9102	2.0496	5.13472	4.08146	0							960.25	28.6	27.6	35.8	22.3	23.1	23.2	8.4	5.2	11.4	0
960.25	29.9847	39.6361	27.4767	10.0891	19.9369	19.9369	2.0745	5.16267	4.08507	0							963.4	28.6	27.6	35.8	22.4	23.1	23.3	8.4	5.2	11.4	0
963.4	30.0272	39.6711	27.5138	10.0997	19.9641	19.9641	2.09166	5.19211	4.07662	0							966.55	28.7	27.6	35.8	22.5	23.1	23.3	8.4	5.2	11.5	0
966.55	30.068	39.7081	27.5513	10.0968	19.9896	19.9896	2.10542	5.21577	4.08528	0							969.7	28.7	27.7	35.8	22.6	23.2	23.3	8.4	5.2	11.5	0
969.7	30.1017	39.7462	27.5957	10.0817	20.0206	20.0206	2.11891	5.24152	4.10718	0							972.85	28.7	27.7	35.9	22.7	23.2	23.3	8.5	5.3	11.6	0
972.85	30.1309	39.7978	27.6422	10.0648	20.0613	20.0613	2.13248	5.2664	4.13007	0							976	28.8	27.7	35.9	22.7	23.2	23.3	8.5	5.3	11.6	0
976	30.1624	39.8522	27.6862	10.0517	20.0997	20.0997	2.15078	5.27941	4.17861	0							979.15	28.8	27.7	35.9	22.8	23.2	23.3	8.5	5.3	11.7	0
979.15	30.1913	39.8987	27.7307	10.0505	20.1363	20.1363	2.1752	5.28387	4.2607	0							982.3	28.8	27.8	35.9	22.9	23.2	23.3	8.5	5.4	11.8	0
982.3	30.2178	39.953	27.7745	10.064	20.174	20.174	2.20305	5.29036	4.35721	0							985.45	28.9	27.8	36	22.9	23.2	23.3	8.5	5.4	11.8	0
985.45	30.2455	40.0041	27.8128	10.078	20.2115	20.2115	2.2257	5.29778	4.44604	0							988.6	28.9	27.8	36	22.9	23.2	23.3	8.5	5.4	11.9	0
988.6	30.2751	40.039	27.8483	10.0948	20.2389	20.2389	2.24216	5.30593	4.54485	0							991.75	28.9	27.8	36	22.9	23.2	23.3	8.6	5.5	12	0
991.75	30.3074	40.0669	27.8851	10.1247	20.2572	20.2572	2.25345	5.32689	4.63142	0							994.9	28.9	27.9	36.1	22.9	23.3	23.4	8.6	5.5	12	0
994.9	30.3409	40.0964	27.9197	10.1559	20.2825	20.2825	2.2591	5.3559	4.66832	0							998.05	29	27.9	36.1	22.9	23.3	23.4	8.6	5.5	12.1	0
998.05	30.3754	40.1448	27.9496	10.1817	20.3106	20.3106	2.25662	5.38155	4.66419	0							1001.2	29	27.9	36.2	22.9	23.4	23.4	8.6	5.5	12.1	0
1001.2	30.4067	40.1796	27.9826	10.2078	20.3337	20.3337	2.25018	5.40886	4.62379	0							1004.35	29	27.9	36.2	23	23.4	23.4	8.6	5.5	12.2	0
1004.35	30.4284	40.2129	28.0258	10.2334	20.3645	20.3645	2.24337	5.43842	4.56873	0							1007.5	29.1	27.9	36.3	23.1	23.4	23.4	8.6	5.5	12.2	0
1007.5	30.4488	40.2544	28.0718	10.2452	20.4007	20.4007	2.23982	5.46396	4.51922	0							1010.65	29.1	28	36.3	23.1	23.4	23.5	8.7	5.5	12.3	0
1010.65	30.4757	40.2854	28.1192	10.2516	20.4355	20.4355	2.24245	5.4856	4.49816	0							1013.8	29.2	28	36.3	23.2	23.4	23.5	8.7	5.6	12.3	0
1013.8	30.5023	40.3165	28.1741	10.2593	20.4741	20.4741	2.25587	5.50682	4.50984	0							1016.95	29.2	28	36.4	23.2	23.4	23.5	8.7	5.6	12.4	0
1016.95	30.5284	40.3464	28.2251	10.2582	20.5174	20.5174	2.29141	5.53301	4.53052	0							1020.1	29.2	28.1	36.4	23.2	23.5	23.5	8.7	5.6	12.4	0
1020.1	30.5588	40.3814	28.2736	10.249	20.5628	20.5628	2.32449	5.54712	4.5782	0							1023.25	29.3	28.1	36.4	23.2	23.5	23.5	8.8	5.7	12.4	0
1023.25	30.5927	40.4122	28.3142	10.241	20.5967	20.5967	2.35046	5.55686	4.61175	0							1026.4	29.3	28.1	36.5	23.2	23.5	23.6	8.8	5.7	12.5	0
1026.4	30.6277	40.4573	28.3506	10.2431	20.6278	20.6278	2.37466	5.57638	4.61799	0							1029.55	29.3	28.2	36.5	23.2	23.6	23.6	8.8	5.7	12.5	0
1029.55	30.6588	40.5149	28.3724	10.2461	20.6626	20.6626	2.38997	5.59298	4.6014	0							1032.7	29.4	28.2	36.5	23.3	23.7	23.6	8.8	5.8	12.5	0
1032.7	30.6918	40.5712	28.3922	10.2466	20.6931	20.6931	2.38992	5.60838	4.59279	0							1035.85	29.4	28.2	36.5	23.3	23.8	23.7	8.8	5.8	12.5	0
1035.85	30.7229	40.6071	28.4195	10.2544	20.7182	20.7182	2.37933	5.63287	4.60544	0							1039	29.4	28.2	36.6	23.4	23.8	23.7	8.9	5.8	12.6	0
1039	30.7454	40.6559	28.4493	10.2573	20.7402	20.7402	2.36604	5.66511	4.65576	0							1042.15	29.4	28.2	36.6	23.4	23.9	23.7	8.9	5.8	12.6	0
1042.15	30.7712	40.7062	28.4784	10.2646	20.7653	20.7653	2.35694	5.69402	4.69945	0							1045.3	29.5	28.3	36.6	23.5	23.9	23.7	8.9	5.8	12.7	0
1045.3	30.7998	40.7458	28.5085	10.2788	20.7949	20.7949	2.3425	5.71447	4.74906	0							1048.45	29.5	28.3	36.7	23.5	24	23.7	8.9	5.8	12.8	0
1048.45	30.8254	40.781	28.5451	10.2935	20.8259	20.8259	2.32807	5.73064	4.78299	0							1051.6	29.5	28.3	36.7	23.5	24	23.8	8.9	5.8	12.8	0
1051.6	30.8503	40.807	28.5791	10.3039	20.8569	20.8569	2.31929	5.74512	4.75288	0							1054.75	29.5	28.4	36.7	23.5	24	23.8	9	5.9	12.9	0
1054.75	30.8751	40.8266	28.6083	10.3123	20.8834	20.8834	2.30792	5.74905	4.67553	0							1057.9	29.6	28.4	36.8	23.6	24	23.8	9	5.9	13	0
1057.9	30.9011	40.8512	28.6414	10.3231	20.9105	20.9105	2.29758	5.75435	4.59333	0							1061.05	29.6	28.5	36.8	23.6	24.1	23.8	9	5.9	13	0
1061.05	30.9307	40.8714	28.6737	10.3376	20.941	20.941	2.29363	5.76952	4.52976	0							1064.2	29.7	28.5	36.8	23.6	24.1	23.8	9	5.9	13.1	0
1064.2	30.956	40.8909	28.7036	10.3448	20.9773	20.9773	2.29856	5.78645	4.50261	0							1067.35	29.7	28.5	36.8	23.6	24.2	23.8	9.1	5.9	13.2	0
1067.35	30.9832	40.9175	28.7361	10.347	21.0157	21.0157	2.30629	5.80534	4.51386	0							1070.5	29.7	28.5	36.9	23.6	24.2	23.9	9.1	6	13.2	0
1070.5	31.011	40.945	28.7729	10.3502	21.0536	21.0536	2.32098	5.83076	4.55442	0							1073.65	29.8	28.6	36.9	23.7	24.3	23.9	9.1	6	13.3	0
1073.65	31.0296	40.968	28.8094	10.3513	21.0945	21.0945	2.34152	5.85865	4.62528	0							1076.8	29.8	28.6	36.9	23.7	24.3	23.9	9.1	6	13.4	0
1076.8	31.0443	40.9883	28.8392	10.3522	21.1375	21.1375	2.36713	5.87995	4.69919	0							1079.95	29.8	28.6	37	23.7	24.3	23.9	9.1	6.1	13.5	0
1079.95	31.0662	41.0137	28.866	10.3588	21.1783	21.1783	2.39513	5.89145	4.76265	0							1083.1	29.9	28.7	37	23.7	24.4	23.9	9.1	6.1	13.6	0
1083.1	31.0949	41.0404	28.8922	10.3723	21.2218	21.2218	2.42766	5.90443	4.80578	0							1086.25	29.9	28.7	37	23.8	24.4	24	9.2	6.1	13.6	0
1086.25	31.1236	41.0629	28.9126	10.3886	21.2656	21.2656	2.44792	5.91329	4.84415	0							1089.4	29.9	28.7	37.1	23.8	24.4	24	9.2	6.1	13.7	0
1089.4	31.1489	41.09	28.9314	10.4094	21.3083	21.3083	2.46252	5.91638	4.88333	0							1092.55	29.9	28.8	37.1	23.8	24.4	24	9.2	6.1	13.7	0
1092.55	31.1786	41.1212	28.9527	10.437	21.346	21.346	2.49892	5.92844	4.90958	0							1095.7	29.9	28.8	37.2	23.8	24.4	24	9.2	6.1	13.7	0
1095.7	31.2095	41.143	28.9766	10.4564	21.3858	21.3858	2.54023	5.94056	4.90337	0							1098.85	30	28.8	37.2	23.8	24.5	24	9.2	6.1	13.8	0
1098.85	31.2338	41.1626	29.0025	10.4653	21.4235	21.4235	2.56803	5.9475	4.89685	0							1102	30	28.9	37.2	23.8	24.5	24	9.3	6.1	13.8	0
1102	31.259	41.1843	29.0348	10.4769	21.4595	21.4595	2.60302	5.95803	4.91203	0							1105.15	30	28.9	37.3	23.9	24.6	24	9.3	6.1	13.9	0
1105.15	31.2819	41.2039	29.0699	10.4891	21.4881	21.4881	2.65789	5.97392	4.94503	0							1108.3	30	28.9	37.3	23.9	24.6	24.1	9.3	6.2	13.9	0
1108.3	31.3014	41.2199	29.0953	10.4992	21.509	21.509	2.70479	5.99341	4.95558	0							1111.45	30.1	29	37.3	23.9	24.6	24.1	9.3	6.2	14	0
1111.45	31.3224	41.2377	29.1198	10.5069	21.5252	21.5252	2.73568	6.0029	4.95427	0							1114.6	30.1	29	37.4	24	24.6	24.1	9.3	6.2	14	0
1114.6	31.3496	41.2707	29.1508	10.5169	21.536	21.536	2.74488	6.01572	4.9369	0							1117.75	30.1	29	37.4	24	24.6	24.1	9.3	6.2	14.1	0
1117.75	31.3823	41.3036	29.1842	10.5414	21.5549	21.5549	2.74107	6.03778	4.8888	0							1120.9	30.2	29	37.4	24	24.6	24.2	9.4	6.2	14.1	0
1120.9	31.4112	41.3353	29.2067	10.5676	21.575	21.575	2.71146	6.05598	4.84142	0							1124.05	30.2	29.1	37.4	24	24.6	24.2	9.4	6.3	14.2	0
1124.05	31.4376	41.3665	29.2297	10.5905	21.5911	21.5911	2.65355	6.07186	4.79352	0							1127.2	30.2	29.1	37.5	24.1	24.6	24.2	9.4	6.3	14.2	0
1127.2	31.4669	41.3998	29.262	10.6169	21.6124	21.6124	2.58557	6.08799	4.76124	0							1130.35	30.2	29.1	37.5	24.1	24.6	24.2	9.4	6.3	14.3	0
1130.35	31.5015	41.4123	29.3011	10.6349	21.6447	21.6447	2.53773	6.09601	4.74585	0							1133.5	30.3	29.2	37.5	24.2	24.6	24.2	9.4	6.3	14.3	0
1133.5	31.5327	41.4275	29.3401	10.6426	21.676	21.676	2.48491	6.1005	4.74275	0							1136.65	30.3	29.2	37.6	24.2	24.6	24.2	9.4	6.4	14.4	0
1136.65	31.5594	41.4448	29.3763	10.6552	21.7025	21.7025	2.4452	6.10481	4.76817	0							1139.8	30.3	29.2	37.6	24.2	24.7	24.3	9.5	6.4	14.4	0
1139.8	31.5868	41.4662	29.4042	10.6605	21.7219	21.7219	2.44085	6.11812	4.78263	0							1142.95	30.3	29.2	37.6	24.2	24.7	24.3	9.5	6.4	14.4	0
1142.95	31.6135	41.4909	29.43	10.6526	21.7526	21.7526	2.4698	6.1287	4.80169	0							1146.1	30.3	29.3	37.7	24.2	24.8	24.3	9.5	6.4	14.5	0
1146.1	31.6375	41.521	29.462	10.6515	21.775	21.775	2.51916	6.1359	4.82732	0							1149.25	30.4	29.3	37.7	24.2	24.8	24.3	9.5	6.4	14.5	0
1149.25	31.6574	41.5601	29.4952	10.6569	21.7958	21.7958	2.55591	6.14868	4.85696	0							1152.4	30.4	29.3	37.7	24.3	24.8	24.4	9.6	6.4	14.5	0
1152.4	31.6792	41.597	29.5281	10.6584	21.8142	21.8142	2.57674	6.16251	4.88658	0							1155.55	30.4	29.4	37.8	24.3	24.9	24.4	9.6	6.4	14.6	0
1155.55	31.7006	41.6288	29.5543	10.6609	21.8243	21.8243	2.58064	6.16973	4.92109	0							1158.7	30.4	29.4	37.8	24.4	24.9	24.4	9.6	6.5	14.6	0
1158.7	31.7205	41.6607	29.5792	10.672	21.8311	21.8311	2.5992	6.17303	4.96236	0							1161.85	30.5	29.4	37.8	24.5	24.9	24.4	9.6	6.5	14.7	0
1161.85	31.7441	41.6892	29.6066	10.6873	21.8392	21.8392	2.62178	6.1761	5.01742	0							1165	30.5	29.4	37.8	24.6	24.9	24.4	9.7	6.5	14.7	0
1165	31.7736	41.7149	29.6308	10.7045	21.8563	21.8563	2.63561	6.17837	5.06049	0							1168.15	30.5	29.4	37.9	24.6	24.9	24.4	9.7	6.5	14.8	0
1168.15	31.8019	41.7409	29.6488	10.7323	21.8775	21.8775	2.63864	6.17845	5.08578	0							1171.3	30.5	29.5	37.9	24.6	24.8	24.4	9.7	6.5	14.9	0
1171.3	31.8261	41.7669	29.6657	10.7611	21.9017	21.9017	2.64363	6.18369	5.09787	0							1174.45	30.6	29.5	37.9	24.6	24.8	24.4	9.7	6.6	14.9	0
1174.45	31.8494	41.789	29.6861	10.776	21.9406	21.9406	2.64834	6.19957	5.08494	0							1177.6	30.6	29.5	38	24.5	24.8	24.4	9.7	6.6	15	0
1177.6	31.87	41.8033	29.7085	10.7843	21.9877	21.9877	2.65024	6.2175	5.02643	0							1180.75	30.7	29.5	38	24.5	24.8	24.5	9.7	6.6	15	0
1180.75	31.8889	41.823	29.7388	10.7899	22.0297	22.0297	2.65469	6.23888	4.96689	0							1183.9	30.7	29.6	38	24.5	24.9	24.5	9.8	6.6	15.1	0
1183.9	31.9071	41.8494	29.7713	10.7803	22.0738	22.0738	2.65849	6.26532	4.92914	0							1187.05	30.7	29.6	38.1	24.5	24.9	24.5	9.8	6.7	15.1	0
1187.05	31.9315	41.876	29.799	10.7697	22.1167	22.1167	2.66454	6.28588	4.91498	0							1190.2	30.7	29.6	38.1	24.6	24.9	24.6	9.8	6.7	15.2	0
1190.2	31.9605	41.9084	29.8194	10.7516	22.1532	22.1532	2.6695	6.30192	4.91386	0							1193.35	30.8	29.6	38.1	24.6	25	24.6	9.8	6.7	15.2	0
1193.35	31.9861	41.9443	29.8378	10.7368	22.1806	22.1806	2.66589	6.31368	4.92799	0							1196.5	30.8	29.7	38.2	24.6	25	24.6	9.8	6.7	15.3	0
1196.5	32.0124	41.9798	29.8643	10.7256	22.2013	22.2013	2.65387	6.31949	4.93229	0							1199.65	30.8	29.7	38.2	24.6	25	24.6	9.8	6.7	15.4	0
1199.65	32.044	42.0083	29.8905	10.7194	22.2154	22.2154	2.63064	6.32349	4.95196	0							1202.8	30.9	29.7	38.2	24.6	25.1	24.7	9.9	6.8	15.5	0
1202.8	32.0747	42.0336	29.9171	10.7341	22.2297	22.2297	2.60254	6.32457	4.9389	0							1205.95	30.9	29.7	38.2	24.6	25.1	24.7	9.9	6.8	15.6	0
1205.95	32.0962	42.0526	29.9476	10.7466	22.2466	22.2466	2.582	6.33852	4.85456	0							1209.1	30.9	29.7	38.3	24.6	25.1	24.7	9.9	6.8	15.6	0
1209.1	32.1138	42.0742	29.9776	10.7545	22.2748	22.2748	2.56988	6.35421	4.81171	0							1212.25	31	29.7	38.3	24.7	25.1	24.8	9.9	6.8	15.7	0
1212.25	32.1374	42.0978	30.0053	10.7587	22.3012	22.3012	2.5714	6.36514	4.78132	0							1215.4	31	29.8	38.3	24.7	25.1	24.8	10	6.9	15.7	0
1215.4	32.1642	42.131	30.032	10.7679	22.3225	22.3225	2.58255	6.3826	4.76563	0							1218.55	31	29.8	38.3	24.8	25.2	24.8	10	6.9	15.7	0
1218.55	32.1941	42.1688	30.0537	10.7705	22.3455	22.3455	2.60919	6.40581	4.81861	0							1221.7	31.1	29.8	38.4	24.8	25.2	24.8	10	6.9	15.7	0
1221.7	32.2237	42.2024	30.0639	10.7688	22.3684	22.3684	2.64458	6.44266	4.9656	0							1224.85	31.1	29.9	38.4	24.8	25.2	24.9	10	7	15.7	0
1224.85	32.2507	42.2457	30.0783	10.7636	22.3867	22.3867	2.67623	6.47235	5.14132	0							1228	31.1	29.9	38.4	24.8	25.2	24.9	10.1	7	15.8	0
1228	32.2694	42.2866	30.0966	10.7692	22.393	22.393	2.69907	6.50335	5.25842	0							1231.15	31.1	29.9	38.4	24.8	25.2	24.9	10.1	7	15.8	0
1231.15	32.293	42.323	30.12	10.7828	22.398	22.398	2.71213	6.53313	5.3381	0							1234.3	31.2	30	38.5	24.7	25.2	24.9	10.1	7	15.8	0
1234.3	32.3235	42.3605	30.1329	10.7982	22.4018	22.4018	2.70325	6.55211	5.35079	0							1237.45	31.2	30	38.5	24.7	25.2	24.9	10.1	7	15.8	0
1237.45	32.3535	42.3985	30.153	10.8212	22.4059	22.4059	2.68245	6.56426	5.30364	0							1240.6	31.2	30	38.5	24.7	25.3	24.9	10.1	7.1	15.8	0
1240.6	32.378	42.4309	30.1758	10.8478	22.4191	22.4191	2.67721	6.57305	5.2634	0							1243.75	31.2	30	38.5	24.8	25.3	24.9	10.1	7.1	15.8	0
1243.75	32.4018	42.4605	30.2001	10.8685	22.4454	22.4454	2.65305	6.57322	5.2358	0							1246.9	31.2	30.1	38.6	24.8	25.4	24.9	10.2	7.1	15.8	0
1246.9	32.4279	42.4913	30.2323	10.8816	22.4829	22.4829	2.6256	6.57568	5.23316	0							1250.05	31.3	30.1	38.6	24.9	25.4	24.9	10.2	7.1	15.8	0
1250.05	32.4517	42.5201	30.2619	10.8899	22.523	22.523	2.61212	6.58746	5.26197	0							1253.2	31.3	30.1	38.6	24.9	25.4	24.9	10.2	7.1	15.8	0
1253.2	32.4695	42.5394	30.2872	10.8926	22.5647	22.5647	2.61487	6.60702	5.31162	0							1256.35	31.3	30.1	38.6	25	25.4	24.9	10.2	7.1	15.8	0
1256.35	32.4874	42.5514	30.3113	10.8966	22.6103	22.6103	2.63281	6.62309	5.3576	0							1259.5	31.4	30.2	38.7	25	25.4	24.9	10.2	7.1	15.9	0
1259.5	32.5045	42.5673	30.3368	10.9097	22.6506	22.6506	2.64344	6.63581	5.39369	0							1262.65	31.4	30.2	38.7	25	25.5	24.9	10.3	7.1	15.9	0
1262.65	32.5206	42.5769	30.3657	10.9338	22.6829	22.6829	2.65486	6.64981	5.41086	0							1265.8	31.5	30.3	38.7	25	25.5	24.9	10.3	7.2	16	0
1265.8	32.5388	42.5882	30.3883	10.9513	22.709	22.709	2.6735	6.66247	5.412	0							1268.95	31.5	30.3	38.8	25	25.5	24.9	10.3	7.2	16	0
1268.95	32.5636	42.6059	30.4049	10.9673	22.7288	22.7288	2.70688	6.67467	5.38835	0							1272.1	31.5	30.3	38.8	25.1	25.5	24.9	10.3	7.2	16.1	0
1272.1	32.5919	42.628	30.4259	10.9871	22.7514	22.7514	2.74425	6.69173	5.3486	0							1275.25	31.5	30.4	38.8	25.1	25.5	24.9	10.4	7.2	16.1	0
1275.25	32.6185	42.6535	30.4452	10.9979	22.7799	22.7799	2.77279	6.70952	5.29779	0							1278.4	31.6	30.4	38.9	25.1	25.6	24.9	10.4	7.2	16.1	0
1278.4	32.6413	42.6942	30.4593	11.0001	22.8103	22.8103	2.78411	6.72189	5.24587	0							1281.55	31.6	30.4	38.9	25.1	25.6	24.9	10.4	7.3	16.1	0
1281.55	32.6646	42.7398	30.4725	11.0087	22.8353	22.8353	2.78811	6.73154	5.20523	0							1284.7	31.6	30.4	38.9	25.1	25.6	25	10.4	7.3	16.1	0
1284.7	32.6888	42.7812	30.4827	11.0194	22.8489	22.8489	2.80567	6.73816	5.18293	0							1287.85	31.6	30.4	38.9	25.1	25.6	25	10.4	7.3	16.1	0
1287.85	32.7103	42.8125	30.4899	11.0259	22.8645	22.8645	2.83119	6.74275	5.17129	0							1291	31.6	30.4	38.9	25.1	25.6	25	10.4	7.4	16.1	0
1291	32.7319	42.848	30.4943	11.0298	22.8789	22.8789	2.85668	6.74638	5.1726	0							1294.15	31.6	30.4	39	25.1	25.6	25	10.5	7.4	16.1	0
1294.15	32.7536	42.8839	30.505	11.0365	22.8867	22.8867	2.87788	6.75241	5.19646	0							1297.3	31.6	30.5	39	25.1	25.6	25.1	10.5	7.4	16.1	0
1297.3	32.7726	42.9177	30.5257	11.038	22.8918	22.8918	2.89152	6.7664	5.25878	0							1300.45	31.7	30.5	39	25.1	25.7	25.1	10.5	7.4	16.1	0
1300.45	32.7906	42.9456	30.5455	11.0326	22.8894	22.8894	2.90047	6.77513	5.3021	0							1303.6	31.7	30.5	39.1	25.1	25.7	25.1	10.5	7.4	16.1	0
1303.6	32.8098	42.9737	30.5641	11.0297	22.8899	22.8899	2.91189	6.77987	5.34391	0							1306.75	31.7	30.5	39.1	25.1	25.7	25.1	10.6	7.4	16.1	0
1306.75	32.8319	43.0026	30.5925	11.0301	22.8969	22.8969	2.92588	6.7894	5.39816	0							1309.9	31.8	30.6	39.1	25.1	25.7	25.1	10.6	7.5	16.1	0
1309.9	32.8519	43.027	30.6192	11.0163	22.9181	22.9181	2.94454	6.79591	5.43342	0							1313.05	31.8	30.6	39.1	25.1	25.8	25.1	10.6	7.5	16.1	0
1313.05	32.8679	43.0487	30.6403	10.9993	22.9281	22.9281	2.95032	6.80538	5.42505	0							1316.2	31.8	30.6	39.1	25.2	25.8	25.1	10.7	7.5	16.1	0
1316.2	32.8851	43.0767	30.6655	10.9977	22.9331	22.9331	2.94678	6.81488	5.36585	0							1319.35	31.8	30.7	39.1	25.2	25.8	25.1	10.7	7.6	16.1	0
1319.35	32.905	43.0966	30.6892	10.9973	22.9399	22.9399	2.9505	6.8335	5.25926	0							1322.5	31.9	30.7	39.2	25.2	25.9	25.1	10.7	7.6	16.2	0
1322.5	32.9238	43.1043	30.7109	10.9864	22.9634	22.9634	2.96652	6.85518	5.1361	0							1325.65	31.9	30.7	39.2	25.2	26	25.1	10.7	7.6	16.2	0
1325.65	32.9417	43.1106	30.7349	10.9776	22.9912	22.9912	2.97281	6.8692	5.00958	0							1328.8	31.9	30.7	39.2	25.2	26	25.1	10.7	7.7	16.2	0
1328.8	32.9644	43.1191	30.7603	10.9733	23.0112	23.0112	2.97968	6.88517	4.91193	0							1331.95	31.9	30.8	39.2	25.3	26.1	25.1	10.7	7.7	16.2	0
1331.95	32.9898	43.1307	30.7848	10.9705	23.034	23.034	2.99455	6.89656	4.86888	0							1335.1	31.9	30.8	39.3	25.3	26.2	25.1	10.8	7.7	16.2	0
1335.1	33.0135	43.1463	30.8029	10.9692	23.0488	23.0488	3.00119	6.89758	4.91228	0							1338.25	32	30.8	39.3	25.3	26.2	25.2	10.8	7.7	16.2	0
1338.25	33.0368	43.1721	30.8223	10.9784	23.0566	23.0566	3.00449	6.8975	5.03586	0							1341.4	32	30.9	39.3	25.4	26.3	25.2	10.8	7.7	16.2	0
1341.4	33.0606	43.2112	30.8475	10.994	23.0596	23.0596	3.024	6.90127	5.21222	0							1344.55	32	30.9	39.4	25.4	26.3	25.2	10.8	7.7	16.2	0
1344.55	33.0794	43.2631	30.8706	11.0107	23.0563	23.0563	3.03212	6.90618	5.31745	0							1347.7	32	30.9	39.4	25.4	26.4	25.2	10.8	7.7	16.2	0
1347.7	33.0949	43.3157	30.8931	11.0314	23.0454	23.0454	3.03329	6.91405	5.3253	0							1350.85	32.1	30.9	39.4	25.5	26.4	25.2	10.9	7.7	16.2	0
1350.85	33.1149	43.3601	30.9194	11.0575	23.0374	23.0374	3.04788	6.92782	5.26636	0							1354	32.1	30.9	39.4	25.4	26.4	25.2	10.9	7.7	16.2	0
1354	33.1356	43.3866	30.9429	11.0827	23.0431	23.0431	3.07717	6.94395	5.23871	0							1357.15	32.1	30.9	39.4	25.4	26.5	25.2	10.9	7.7	16.2	0
1357.15	33.1551	43.3951	30.9609	11.1008	23.0625	23.0625	3.10382	6.9543	5.24027	0							1360.3	32.2	31	39.5	25.4	26.5	25.2	10.9	7.7	16.2	0
1360.3	33.1751	43.396	30.9836	11.1175	23.0866	23.0866	3.12186	6.9633	5.27141	0							1363.45	32.2	31	39.5	25.5	26.5	25.2	10.9	7.7	16.3	0
1363.45	33.1966	43.3993	31.0075	11.1352	23.1127	23.1127	3.14027	6.97592	5.3091	0							1366.6	32.2	31	39.5	25.5	26.5	25.2	10.9	7.7	16.3	0
1366.6	33.218	43.4063	31.0283	11.1434	23.1397	23.1397	3.15776	6.98369	5.34973	0							1369.75	32.2	31	39.5	25.6	26.5	25.3	10.9	7.8	16.3	0
1369.75	33.2375	43.4165	31.0522	11.1465	23.1617	23.1617	3.16274	6.98421	5.3663	0							1372.9	32.2	31.1	39.6	25.6	26.5	25.3	10.9	7.8	16.3	0
1372.9	33.2546	43.4377	31.0805	11.1494	23.1775	23.1775	3.16044	6.97982	5.37166	0							1376.05	32.2	31.1	39.6	25.7	26.5	25.3	10.9	7.8	16.4	0
1376.05	33.2721	43.4697	31.1088	11.1499	23.1962	23.1962	3.16085	6.97607	5.34654	0							1379.2	32.2	31.1	39.6	25.7	26.5	25.3	11	7.8	16.4	0
1379.2	33.291	43.5038	31.1321	11.1478	23.2179	23.2179	3.15238	6.96779	5.24133	0							1382.35	32.2	31.1	39.6	25.8	26.6	25.3	11	7.9	16.5	0
1382.35	33.3096	43.5388	31.1485	11.1494	23.2364	23.2364	3.14364	6.96041	5.01095	0							1385.5	32.2	31.1	39.6	25.8	26.6	25.3	11	7.9	16.5	0
1385.5	33.3329	43.5693	31.1677	11.1642	23.2596	23.2596	3.16008	6.95784	4.73787	0							1388.65	32.2	31.1	39.7	25.8	26.6	25.3	11	7.9	16.5	0
1388.65	33.3616	43.5904	31.1862	11.184	23.2887	23.2887	3.16578	6.95571	4.49425	0							1391.8	32.2	31.2	39.7	25.8	26.7	25.3	11	7.9	16.5	0
1391.8	33.3899	43.6112	31.2045	11.2029	23.316	23.316	3.17202	6.95109	4.28277	0							1394.95	32.3	31.2	39.7	25.9	26.7	25.3	11.1	7.9	16.5	0
1394.95	33.4167	43.6328	31.2365	11.2306	23.335	23.335	3.16865	6.95624	4.15164	0							1398.1	32.3	31.2	39.7	25.9	26.7	25.3	11.1	7.9	16.4	0
1398.1	33.44	43.6474	31.2708	11.2589	23.3431	23.3431	3.1637	6.9666	4.06769	0							1401.25	32.3	31.2	39.8	26	26.8	25.3	11.1	8	16.3	0
1401.25	33.4601	43.6653	31.3	11.2712	23.3553	23.3553	3.13866	6.97404	3.99791	0							1404.4	32.4	31.2	39.8	26	26.8	25.3	11.2	8	16.3	0
1404.4	33.4781	43.684	31.3292	11.2757	23.3694	23.3694	3.09434	6.98101	3.92732	0							1407.55	32.4	31.2	39.8	26.1	26.8	25.3	11.2	8	16.3	0
1407.55	33.4934	43.7022	31.3591	11.2713	23.3862	23.3862	3.06551	6.99347	3.84884	0							1410.7	32.4	31.3	39.8	26.1	26.7	25.3	11.2	8	16.3	0
1410.7	33.5133	43.724	31.3829	11.2516	23.4031	23.4031	3.04774	7.01088	3.78327	0							1413.85	32.4	31.3	39.9	26.1	26.7	25.4	11.2	8	16.3	0
1413.85	33.5389	43.7538	31.3999	11.2178	23.4258	23.4258	3.03713	7.02161	3.73666	0							1417	32.4	31.3	39.9	26.1	26.7	25.4	11.2	8	16.3	0
1417	33.5621	43.7882	31.4163	11.1928	23.4371	23.4371	3.04324	7.03054	3.76773	0							1420.15	32.4	31.4	39.9	26.1	26.6	25.4	11.2	8.1	16.3	0
1420.15	33.5876	43.8231	31.4411	11.1744	23.4444	23.4444	3.03973	7.04935	3.88763	0							1423.3	32.4	31.4	39.9	26.2	26.6	25.4	11.3	8.1	16.4	0
1423.3	33.6155	43.8516	31.4661	11.1552	23.444	23.444	3.0467	7.06128	4.07318	0							1426.45	32.5	31.4	39.9	26.2	26.6	25.4	11.3	8.1	16.4	0
1426.45	33.642	43.8823	31.4931	11.1443	23.4369	23.4369	3.05507	7.07002	4.33247	0							1429.6	32.5	31.4	39.9	26.2	26.6	25.5	11.3	8.1	16.4	0
1429.6	33.6665	43.9105	31.5248	11.1517	23.4294	23.4294	3.06831	7.08186	4.5415	0							1432.75	32.5	31.5	40	26.2	26.6	25.5	11.3	8.1	16.4	0
1432.75	33.691	43.9333	31.5554	11.173	23.4272	23.4272	3.09066	7.09786	4.73851	0							1435.9	32.5	31.5	40	26.2	26.5	25.5	11.3	8.1	16.4	0
1435.9	33.7176	43.9544	31.578	11.1947	23.435	23.435	3.09778	7.10464	4.92289	0							1439.05	32.5	31.5	40	26.2	26.5	25.5	11.3	8.1	16.4	0
1439.05	33.7411	43.9714	31.5974	11.2201	23.4437	23.4437	3.10391	7.10397	5.08461	0							1442.2	32.5	31.5	40.1	26.2	26.5	25.5	11.4	8.1	16.4	0
1442.2	33.7645	43.9918	31.6149	11.2471	23.452	23.452	3.11373	7.11391	5.23904	0							1445.35	32.6	31.5	40.1	26.1	26.5	25.5	11.4	8.2	16.5	0
1445.35	33.7937	44.014	31.6259	11.2676	23.4595	23.4595	3.12223	7.12306	5.35468	0							1448.5	32.6	31.6	40.1	26.1	26.5	25.5	11.4	8.2	16.4	0
1448.5	33.8231	44.0331	31.6356	11.2775	23.4649	23.4649	3.12524	7.12543	5.42795	0							1451.65	32.6	31.6	40.1	26.1	26.5	25.5	11.4	8.2	16.4	0
1451.65	33.8469	44.0515	31.6512	11.2795	23.4712	23.4712	3.12319	7.13139	5.47017	0							1454.8	32.6	31.6	40.1	26.2	26.6	25.5	11.4	8.2	16.4	0
1454.8	33.8673	44.0682	31.6673	11.2773	23.4772	23.4772	3.12568	7.13373	5.48347	0							1457.95	32.6	31.6	40.1	26.2	26.6	25.6	11.5	8.2	16.4	0
1457.95	33.8886	44.0859	31.6778	11.2748	23.481	23.481	3.13531	7.13	5.46943	0							1461.1	32.7	31.6	40.1	26.2	26.7	25.6	11.5	8.2	16.4	0
1461.1	33.9112	44.1076	31.6915	11.2769	23.4787	23.4787	3.14832	7.12805	5.44692	0							1464.25	32.7	31.7	40.2	26.3	26.7	25.6	11.5	8.3	16.4	0
1464.25	33.9326	44.1306	31.7077	11.2849	23.473	23.473	3.16846	7.12795	5.42716	0							1467.4	32.7	31.7	40.2	26.3	26.8	25.6	11.5	8.3	16.4	0
1467.4	33.9539	44.1492	31.7233	11.2915	23.4695	23.4695	3.18932	7.12335	5.42267	0							1470.55	32.7	31.7	40.2	26.3	26.8	25.6	11.5	8.3	16.4	0
1470.55	33.9826	44.1651	31.738	11.2957	23.4626	23.4626	3.20127	7.10936	5.44547	0							1473.7	32.7	31.7	40.2	26.4	26.9	25.6	11.5	8.3	16.4	0
1473.7	34.0114	44.1848	31.7608	11.3052	23.45	23.45	3.20283	7.09824	5.4738	0							1476.85	32.7	31.7	40.2	26.4	26.9	25.6	11.5	8.3	16.4	0
1476.85	34.0384	44.2073	31.7852	11.3169	23.4414	23.4414	3.20113	7.09266	5.50652	0							1480	32.8	31.8	40.3	26.4	26.9	25.7	11.6	8.4	16.3	0
1480	34.067	44.2283	31.8052	11.3277	23.4403	23.4403	3.20364	7.08416	5.52682	0							1483.15	32.8	31.8	40.3	26.4	26.9	25.7	11.6	8.4	16.3	0
1483.15	34.0954	44.2495	31.8264	11.3419	23.4512	23.4512	3.19761	7.07676	5.49577	0							1486.3	32.8	31.8	40.3	26.4	26.9	25.7	11.6	8.4	16.3	0
1486.3	34.1198	44.273	31.8509	11.371	23.4695	23.4695	3.1908	7.07025	5.43384	0							1489.45	32.8	31.8	40.3	26.5	26.9	25.7	11.6	8.4	16.3	0
1489.45	34.1404	44.2942	31.8702	11.3968	23.4804	23.4804	3.1748	7.06885	5.37552	0							1492.6	32.8	31.8	40.3	26.5	26.9	25.7	11.6	8.4	16.3	0
1492.6	34.1584	44.3164	31.8775	11.4224	23.4951	23.4951	3.14114	7.06492	5.31	0							1495.75	32.9	31.9	40.4	26.5	26.9	25.7	11.7	8.4	16.3	0
1495.75	34.1766	44.3404	31.8872	11.4512	23.5073	23.5073	3.10767	7.05608	5.26665	0							1498.9	32.9	31.9	40.4	26.5	26.9	25.7	11.7	8.4	16.3	0
1498.9	34.191	44.3651	31.8995	11.4805	23.5324	23.5324	3.09281	7.05049	5.2704	0							1502.05	32.9	31.9	40.4	26.5	26.9	25.7	11.7	8.4	16.3	0
1502.05	34.2037	44.3802	31.9111	11.503	23.56	23.56	3.0713	7.0423	5.30385	0							1505.2	32.9	31.9	40.4	26.5	26.9	25.7	11.7	8.5	16.3	0
1505.2	34.2204	44.4002	31.9283	11.5179	23.5832	23.5832	3.05567	7.03176	5.33927	0							1508.35	32.9	31.9	40.4	26.5	26.9	25.7	11.7	8.5	16.3	0
1508.35	34.2362	44.4212	31.9471	11.5225	23.594	23.594	3.06054	7.02905	5.36766	0							1511.5	33	32	40.5	26.5	27	25.7	11.8	8.5	16.2	0
1511.5	34.2529	44.4385	31.9646	11.528	23.6072	23.6072	3.09526	7.0356	5.37259	0							1514.65	33	32	40.5	26.5	27	25.7	11.8	8.5	16.2	0
1514.65	34.2753	44.4531	31.9837	11.5344	23.6255	23.6255	3.13329	7.03808	5.35969	0							1517.8	33	32	40.5	26.5	27	25.7	11.8	8.5	16.2	0
1517.8	34.3044	44.4693	32.0078	11.54	23.6358	23.6358	3.1564	7.03794	5.35079	0							1520.95	33	32.1	40.5	26.5	27	25.7	11.8	8.6	16.2	0
1520.95	34.3363	44.4927	32.0314	11.5409	23.6382	23.6382	3.17824	7.03742	5.35837	0							1524.1	33	32.1	40.5	26.5	27	25.7	11.8	8.6	16.2	0
1524.1	34.3643	44.5108	32.0499	11.5318	23.6407	23.6407	3.1818	7.0394	5.36703	0							1527.25	33.1	32.1	40.5	26.6	27	25.7	11.8	8.6	16.2	0
1527.25	34.3887	44.529	32.0672	11.5232	23.6438	23.6438	3.16402	7.03352	5.3763	0							1530.4	33.1	32.1	40.6	26.6	27	25.7	11.8	8.6	16.2	0
1530.4	34.4162	44.556	32.0872	11.5194	23.6448	23.6448	3.12811	7.02316	5.38425	0							1533.55	33.1	32.1	40.6	26.6	27	25.7	11.8	8.6	16.2	0
1533.55	34.4411	44.5894	32.1163	11.5197	23.6528	23.6528	3.07382	7.01324	5.37575	0							1536.7	33.1	32.2	40.6	26.7	27	25.7	11.8	8.6	16.2	0
1536.7	34.4583	44.6223	32.1443	11.5155	23.6585	23.6585	3.01583	6.99688	5.34614	0							1539.85	33.2	32.2	40.6	26.7	27	25.7	11.9	8.6	16.1	0
1539.85	34.4753	44.6579	32.1694	11.5093	23.6593	23.6593	2.96207	6.97995	5.31471	0							1543	33.2	32.2	40.7	26.7	27	25.7	11.9	8.6	16.1	0
1543	34.4918	44.692	32.1968	11.5104	23.6608	23.6608	2.92109	6.97116	5.28255	0							1546.15	33.2	32.2	40.7	26.7	26.9	25.7	11.9	8.6	16.1	0
1546.15	34.5083	44.7166	32.2231	11.5067	23.6723	23.6723	2.90083	6.97089	5.26087	0							1549.3	33.2	32.2	40.7	26.6	26.9	25.7	11.9	8.6	16.1	0
1549.3	34.5275	44.7332	32.2469	11.4948	23.6912	23.6912	2.88777	6.97345	5.26134	0							1552.45	33.3	32.2	40.8	26.6	26.9	25.8	12	8.6	16.1	0
1552.45	34.5497	44.7501	32.2669	11.4913	23.7052	23.7052	2.87079	6.97818	5.25827	0							1555.6	33.3	32.3	40.8	26.6	26.9	25.8	12	8.6	16.1	0
1555.6	34.5706	44.7637	32.2826	11.4893	23.7159	23.7159	2.86149	6.98866	5.24522	0							1558.75	33.3	32.3	40.8	26.7	26.9	25.8	12	8.6	16.1	0
1558.75	34.5859	44.7707	32.2999	11.4869	23.7236	23.7236	2.85326	6.99947	5.22361	0							1561.9	33.3	32.3	40.9	26.7	26.9	25.8	12.1	8.6	16.2	0
1561.9	34.5998	44.7826	32.3181	11.5002	23.7242	23.7242	2.83866	7	5.18187	0							1565.05	33.3	32.4	40.9	26.7	26.9	25.8	12.1	8.6	16.1	0
1565.05	34.6213	44.8033	32.3451	11.5221	23.7283	23.7283	2.82463	6.99594	5.07507	0							1568.2	33.3	32.4	40.9	26.8	26.9	25.8	12.1	8.6	16	0
1568.2	34.6421	44.8329	32.3767	11.5252	23.7325	23.7325	2.81174	6.98878	4.94581	0							1571.35	33.3	32.4	40.9	26.8	27	25.9	12.1	8.6	15.7	0
1571.35	34.6565	44.8667	32.4021	11.5257	23.7323	23.7323	2.80148	6.97877	4.8313	0							1574.5	33.3	32.4	40.9	26.8	27	25.9	12.1	8.6	15.5	0
1574.5	34.6703	44.899	32.4261	11.54	23.7302	23.7302	2.80741	6.96922	4.74439	0							1577.65	33.4	32.4	40.9	26.8	27	25.9	12.1	8.6	15.3	0
1577.65	34.6884	44.931	32.4481	11.5506	23.7329	23.7329	2.81746	6.96389	4.71106	0							1580.8	33.4	32.5	41	26.8	27	25.9	12.2	8.6	15.1	0
1580.8	34.7058	44.9514	32.4667	11.5515	23.748	23.748	2.82622	6.96137	4.76421	0							1583.95	33.4	32.5	41	26.8	27	25.9	12.2	8.6	15	0
1583.95	34.726	44.9791	32.4878	11.5478	23.7651	23.7651	2.81316	6.95892	4.92185	0							1587.1	33.4	32.5	41	26.9	27	25.9	12.2	8.6	15	0
1587.1	34.7523	45.0116	32.5066	11.5609	23.7818	23.7818	2.80535	6.96214	5.05812	0							1590.25	33.4	32.5	41	26.9	27	25.9	12.2	8.7	15	0
1590.25	34.7759	45.0398	32.5299	11.5797	23.7955	23.7955	2.79995	6.96885	5.16715	0							1593.4	33.5	32.5	41	26.9	27	26	12.2	8.7	15	0
1593.4	34.794	45.0588	32.5511	11.6015	23.8054	23.8054	2.79788	6.9702	5.24585	0							1596.55	33.5	32.5	41	27	27	26	12.2	8.7	15	0
1596.55	34.8132	45.075	32.5802	11.6239	23.8119	23.8119	2.78608	6.96065	5.22895	0							1599.7	33.5	32.6	41.1	27	27	26	12.2	8.7	15	0
1599.7	34.8383	45.0929	32.6119	11.6506	23.82	23.82	2.77743	6.95831	5.12517	0							1602.85	33.5	32.6	41.1	26.9	27	26	12.2	8.7	15	0
1602.85	34.865	45.1085	32.6373	11.662	23.8294	23.8294	2.77407	6.95636	4.97429	0							1606	33.6	32.6	41.1	26.9	27.1	26	12.2	8.7	15.1	0
1606	34.8873	45.1121	32.6565	11.6667	23.8317	23.8317	2.77119	6.948	4.8183	0							1609.15	33.6	32.6	41.1	26.9	27.1	26	12.2	8.8	15.2	0
1609.15	34.9077	45.1204	32.6815	11.6654	23.8242	23.8242	2.78432	6.94149	4.6774	0							1612.3	33.6	32.6	41.1	27	27.1	26.1	12.2	8.8	15.3	0
1612.3	34.9283	45.1332	32.6989	11.6519	23.82	23.82	2.80038	6.9307	4.5716	0							1615.45	33.6	32.7	41.1	27	27.1	26.1	12.2	8.8	15.5	0
1615.45	34.949	45.1445	32.7131	11.6432	23.8184	23.8184	2.80265	6.91428	4.50389	0							1618.6	33.7	32.7	41.2	27	27.1	26.1	12.2	8.8	15.6	0
1618.6	34.9682	45.1641	32.73	11.6414	23.8045	23.8045	2.80168	6.89269	4.48962	0							1621.75	33.7	32.7	41.2	27	27.1	26.1	12.2	8.8	15.7	0
1621.75	34.986	45.1916	32.7486	11.6467	23.7876	23.7876	2.80691	6.87058	4.44358	0							1624.9	33.7	32.7	41.2	26.9	27.1	26.1	12.2	8.8	15.8	0
1624.9	35.0022	45.2165	32.7688	11.6452	23.776	23.776	2.8184	6.84473	4.39083	0							1628.05	33.7	32.7	41.3	26.9	27.1	26.1	12.2	8.8	15.9	0
1628.05	35.0145	45.242	32.7906	11.6399	23.7645	23.7645	2.81536	6.81279	4.30975	0							1631.2	33.7	32.7	41.3	26.8	27.1	26.1	12.2	8.8	15.9	0
1631.2	35.0265	45.2695	32.8224	11.6366	23.7564	23.7564	2.80106	6.78664	4.23091	0							1634.35	33.7	32.7	41.3	26.8	27.1	26.1	12.3	8.9	15.9	0
1634.35	35.0438	45.2993	32.8519	11.6343	23.7584	23.7584	2.79791	6.77065	4.1162	0							1637.5	33.8	32.7	41.2	26.8	27.2	26.1	12.3	8.9	15.9	0
1637.5	35.0671	45.3273	32.8759	11.6306	23.7535	23.7535	2.80268	6.75761	3.99499	0							1640.65	33.8	32.7	41.2	26.8	27.2	26.2	12.3	8.9	15.9	0
1640.65	35.0902	45.3519	32.8984	11.6309	23.7435	23.7435	2.81478	6.74417	3.89519	0							1643.8	33.8	32.7	41.1	26.8	27.2	26.2	12.3	8.9	15.9	0
1643.8	35.1122	45.3788	32.9212	11.6361	23.7386	23.7386	2.8297	6.73291	3.82494	0							1646.95	33.8	32.8	41	26.8	27.2	26.2	12.4	8.9	15.9	0
1646.95	35.1333	45.4015	32.9383	11.6423	23.7386	23.7386	2.82517	6.71543	3.80285	0							1650.1	33.8	32.8	40.9	26.9	27.2	26.2	12.4	8.9	15.9	0
1650.1	35.1565	45.4239	32.9464	11.6514	23.7354	23.7354	2.81295	6.68739	3.82142	0							1653.25	33.9	32.8	40.9	27	27.2	26.2	12.4	8.9	16	0
1653.25	35.1781	45.449	32.9519	11.6643	23.7262	23.7262	2.81322	6.66039	3.85046	0							1656.4	33.9	32.8	40.9	27	27.2	26.2	12.5	8.9	16	0
1656.4	35.1954	45.4657	32.9636	11.6761	23.7182	23.7182	2.8191	6.6408	3.87427	0							1659.55	33.9	32.9	41	27.1	27.2	26.3	12.5	9	16.1	0
1659.55	35.2123	45.4765	32.9736	11.6843	23.7075	23.7075	2.8207	6.62338	3.90291	0							1662.7	33.9	32.9	41	27.2	27.2	26.3	12.5	9	16.1	0
1662.7	35.2271	45.4894	32.9958	11.6931	23.6851	23.6851	2.81572	6.61096	3.92561	0							1665.85	33.9	32.9	41	27.2	27.2	26.3	12.5	9	16.1	0
1665.85	35.2396	45.5046	33.0213	11.7033	23.6512	23.6512	2.82449	6.61034	3.93675	0							1669	33.9	32.9	41.1	27.2	27.2	26.3	12.5	9	16.1	0
1669	35.2543	45.5237	33.0382	11.71	23.6092	23.6092	2.83689	6.61166	3.94691	0							1672.15	33.9	32.9	41.1	27.2	27.2	26.3	12.5	9.1	16.2	0
1672.15	35.2724	45.5376	33.0556	11.7159	23.5599	23.5599	2.84234	6.60782	3.94737	0							1675.3	34	32.9	41.2	27.2	27.3	26.3	12.5	9.1	16.2	0
1675.3	35.2876	45.5569	33.0759	11.7213	23.5074	23.5074	2.8452	6.6015	3.9494	0							1678.45	34	32.9	41.2	27.3	27.3	26.3	12.5	9.1	16.2	0
1678.45	35.3004	45.5851	33.1012	11.7147	23.4602	23.4602	2.84031	6.59835	3.92821	0							1681.6	34	32.9	41.2	27.3	27.3	26.4	12.5	9.2	15.4	0
1681.6	35.3142	45.616	33.123	11.7185	23.425	23.425	2.83194	6.59052	3.89483	0							1684.75	34	33	41.2	27.3	27.3	26.4	12.5	9.2	14.5	0
1684.75	35.3318	45.6448	33.1385	11.7195	23.39	23.39	2.82459	6.57069	3.83731	0							1687.9	34	33	41.3	27.3	27.3	26.4	12.5	9.2	13.8	0
1687.9	35.3472	45.6765	33.1583	11.7204	23.3576	23.3576	2.82071	6.55703	3.76705	0							1691.05	34.1	33	41.3	27.3	27.3	26.4	12.5	9.2	13.1	0
1691.05	35.3603	45.6958	33.1696	11.726	23.3319	23.3319	2.83275	6.54847	3.67525	0							1694.2	34.1	33	41.3	27.3	27.2	26.4	12.5	9.2	12.9	0
1694.2	35.3773	45.7115	33.1824	11.7274	23.3094	23.3094	2.84538	6.53621	3.56435	0							1697.35	34.1	33	41.3	27.3	27.2	26.4	12.5	9.2	13.1	0
1697.35	35.3922	45.729	33.1964	11.7403	23.2867	23.2867	2.86103	6.5243	3.40342	0							1700.5	34.1	33	41.4	27.3	27.2	26.4	12.5	9.2	13.4	0
1700.5	35.4059	45.746	33.2096	11.7516	23.2621	23.2621	2.87825	6.52125	3.27515	0							1703.65	34.1	33.1	41.4	27.3	27.1	26.4	12.5	9.1	13.5	0
1703.65	35.4248	45.7584	33.2233	11.7649	23.2457	23.2457	2.89598	6.52904	3.17164	0							1706.8	34.2	33.1	41.4	27.3	27.1	26.5	12.5	9.1	13.5	0
1706.8	35.4465	45.7635	33.2393	11.7702	23.2316	23.2316	2.89837	6.53125	3.04982	0							1709.95	34.2	33.1	41.4	27.3	27.1	26.5	12.5	9.1	13.4	0
1709.95	35.4675	45.7741	33.257	11.7715	23.2163	23.2163	2.90455	6.53897	2.95195	0							1713.1	34.2	33.2	41.5	27.4	27.1	26.5	12.5	9.2	13.3	0
1713.1	35.4847	45.7884	33.2826	11.7752	23.2115	23.2115	2.90985	6.55505	2.87829	0							1716.25	34.2	33.2	41.5	27.5	27	26.5	12.5	9.2	13.2	0
1716.25	35.5023	45.806	33.3047	11.783	23.2085	23.2085	2.91258	6.56517	2.84414	0							1719.4	34.2	33.2	41.5	27.5	27	26.6	12.5	9.2	13.1	0
1719.4	35.5245	45.8321	33.3226	11.7937	23.2023	23.2023	2.90843	6.56818	2.85107	0							1722.55	34.2	33.2	41.6	27.6	27	26.6	12.5	9.2	13.1	0
1722.55	35.5434	45.8608	33.3428	11.8158	23.1932	23.1932	2.89455	6.56691	2.89046	0							1725.7	34.2	33.2	41.6	27.6	27	26.6	12.5	9.2	13.2	0
1725.7	35.5548	45.8848	33.3579	11.8372	23.1949	23.1949	2.88307	6.55847	2.93308	0							1728.85	34.3	33.2	41.6	27.6	27.1	26.6	12.5	9.2	13.4	0
1728.85	35.5656	45.9102	33.3685	11.8559	23.2055	23.2055	2.86674	6.5531	2.97614	0							1732	34.3	33.2	41.6	27.6	27.1	26.6	12.5	9.2	13.5	0
1732	35.576	45.9362	33.3801	11.875	23.2119	23.2119	2.84855	6.55155	3.01693	0							1735.15	34.3	33.3	41.6	27.6	27.1	26.6	12.5	9.2	13.6	0
1735.15	35.5882	45.9609	33.3934	11.8881	23.2148	23.2148	2.8382	6.55721	3.03836	0							1738.3	34.3	33.3	41.6	27.6	27.1	26.6	12.5	9.3	13.7	0
1738.3	35.6069	45.9796	33.4083	11.8946	23.2146	23.2146	2.82474	6.55992	3.03994	0							1741.45	34.3	33.3	41.7	27.6	27.1	26.6	12.5	9.3	13.8	0
1741.45	35.6282	45.9965	33.4234	11.8992	23.2131	23.2131	2.81232	6.56243	3.01135	0							1744.6	34.4	33.3	41.7	27.6	27.1	26.6	12.5	9.3	13.8	0
1744.6	35.6506	46.0138	33.4406	11.903	23.2164	23.2164	2.80486	6.57191	2.97881	0							1747.75	34.4	33.3	41.7	27.6	27.1	26.6	12.6	9.3	13.9	0
1747.75	35.6671	46.0298	33.4568	11.9096	23.2208	23.2208	2.80287	6.58081	2.97573	0							1750.9	34.4	33.3	41.7	27.6	27.1	26.6	12.6	9.3	13.9	0
1750.9	35.6829	46.0491	33.4688	11.9173	23.217	23.217	2.80303	6.58493	2.97624	0							1754.05	34.4	33.3	41.7	27.6	27.1	26.7	12.6	9.3	14	0
1754.05	35.7022	46.0698	33.4852	11.9264	23.2064	23.2064	2.80008	6.58391	2.95139	0							1757.2	34.5	33.3	41.8	27.6	27.1	26.7	12.6	9.3	14	0
1757.2	35.7209	46.0865	33.5087	11.9311	23.1978	23.1978	2.80875	6.57927	2.92618	0							1760.35	34.5	33.4	41.8	27.6	27.1	26.7	12.6	9.3	14.1	0
1760.35	35.7319	46.0963	33.5325	11.9284	23.1962	23.1962	2.81725	6.57173	2.91057	0							1763.5	34.5	33.4	41.8	27.6	27.1	26.7	12.6	9.3	14.1	0
1763.5	35.7429	46.1069	33.5571	11.9263	23.1952	23.1952	2.82369	6.55886	2.90986	0							1766.65	34.5	33.4	41.8	27.5	27.1	26.8	12.7	9.3	14.2	0
1766.65	35.7579	46.1215	33.5836	11.9282	23.1937	23.1937	2.83214	6.55469	2.92323	0							1769.8	34.5	33.4	41.8	27.5	27.1	26.8	12.7	9.3	14.3	0
1769.8	35.7782	46.1315	33.6111	11.9348	23.1958	23.1958	2.84242	6.55782	2.93685	0							1772.95	34.6	33.4	41.8	27.5	27.1	26.8	12.7	9.3	14.3	0
1772.95	35.7944	46.1412	33.6331	11.9388	23.2042	23.2042	2.84412	6.54953	2.96035	0							1776.1	34.6	33.4	41.9	27.5	27.1	26.8	12.7	9.3	14.4	0
1776.1	35.8109	46.1559	33.6526	11.9377	23.212	23.212	2.83218	6.5422	2.99836	0							1779.25	34.6	33.5	41.9	27.5	27.1	26.8	12.7	9.3	14.4	0
1779.25	35.8247	46.1684	33.6721	11.9461	23.2185	23.2185	2.80683	6.54007	3.04021	0							1782.4	34.6	33.5	41.9	27.5	27	26.8	12.7	9.3	14.5	0
1782.4	35.832	46.1907	33.6834	11.9523	23.2235	23.2235	2.77331	6.53769	3.0809	0							1785.55	34.6	33.5	41.9	27.5	27	26.8	12.7	9.3	14.5	0
1785.55	35.8412	46.2112	33.6951	11.9565	23.2165	23.2165	2.73254	6.53952	3.11694	0							1788.7	34.6	33.5	41.9	27.6	27	26.8	12.7	9.3	14.5	0
1788.7	35.8587	46.2348	33.7132	11.9654	23.2047	23.2047	2.69032	6.53883	3.14659	0							1791.85	34.7	33.5	41.9	27.6	27	26.8	12.8	9.3	14.6	0
1791.85	35.8725	46.254	33.7312	11.9711	23.1889	23.1889	2.65763	6.54015	3.16574	0							1795	34.7	33.5	41.9	27.6	27.1	26.9	12.8	9.3	14.6	0
1795	35.8808	46.2679	33.7401	11.9742	23.1797	23.1797	2.63695	6.53132	3.19079	0							1798.15	34.7	33.5	41.9	27.6	27.1	26.9	12.8	9.3	14.6	0
1798.15	35.8895	46.2789	33.7464	11.9832	23.1659	23.1659	2.62501	6.52609	3.22432	0							1801.3	34.7	33.6	41.9	27.6	27.1	26.9	12.8	9.3	14.7	0
1801.3	35.9025	46.29	33.7574	12.0089	23.1531	23.1531	2.62075	6.52304	3.2589	0							1804.45	34.7	33.6	42	27.5	27.1	26.9	12.8	9.3	14.7	0
1804.45	35.9134	46.2912	33.7688	12.0321	23.1483	23.1483	2.62998	6.51657	3.28702	0							1807.6	34.7	33.6	42	27.5	27.1	26.9	12.8	9.4	14.7	0
1807.6	35.9235	46.2882	33.782	12.047	23.1474	23.1474	2.64813	6.50443	3.31421	0							1810.75	34.7	33.6	42	27.5	27.1	27	12.8	9.4	14.8	0
1810.75	35.9375	46.2938	33.7952	12.059	23.152	23.152	2.65588	6.49439	3.32568	0							1813.9	34.8	33.6	42	27.5	27.1	27	12.8	9.4	14.8	0
1813.9	35.954	46.3027	33.8072	12.0724	23.1595	23.1595	2.6678	6.48862	3.32058	0							1817.05	34.8	33.7	42.1	27.5	27.1	27	12.8	9.4	14.9	0
1817.05	35.9674	46.315	33.8132	12.0719	23.1658	23.1658	2.6761	6.48241	3.29476	0							1820.2	34.8	33.7	42.1	27.6	27	27	12.8	9.4	14.9	0
1820.2	35.9791	46.3307	33.8218	12.0555	23.1733	23.1733	2.67036	6.47114	3.26321	0							1823.35	34.8	33.7	42.1	27.6	27	27	12.8	9.4	14.9	0
1823.35	35.994	46.3555	33.8372	12.0324	23.1815	23.1815	2.65327	6.45873	3.23495	0							1826.5	34.8	33.7	42.1	27.6	27	27	12.9	9.5	14.9	0
1826.5	36.0085	46.3782	33.8529	12.0127	23.195	23.195	2.63553	6.44997	3.21069	0							1829.65	34.8	33.7	42.2	27.6	27	27	12.9	9.5	15	0
1829.65	36.0163	46.3956	33.8696	11.998	23.2096	23.2096	2.61629	6.43877	3.18862	0							1832.8	34.9	33.7	42.2	27.5	27.1	27.1	12.9	9.5	15	0
1832.8	36.0244	46.4158	33.8911	11.9966	23.2172	23.2172	2.59216	6.42833	3.15794	0							1835.95	34.9	33.7	42.2	27.5	27.1	27.1	12.9	9.5	15.1	0
1835.95	36.0346	46.4326	33.917	12.0055	23.2233	23.2233	2.5732	6.42249	3.13707	0							1839.1	34.9	33.7	42.2	27.4	27.1	27.1	13	9.5	15.1	0
1839.1	36.0463	46.4463	33.9419	12.014	23.231	23.231	2.56218	6.41651	3.12015	0							1842.25	34.9	33.8	42.2	27.4	27.1	27.1	13	9.5	15.2	0
1842.25	36.0603	46.4609	33.9628	12.0251	23.235	23.235	2.54445	6.41329	3.09641	0							1845.4	34.9	33.8	42.3	27.4	27.1	27.1	13	9.5	15.2	0
1845.4	36.0767	46.4752	33.9824	12.0405	23.2333	23.2333	2.53289	6.41597	3.08282	0							1848.55	34.9	33.8	42.3	27.4	27.1	27.2	13	9.5	15.3	0
1848.55	36.0964	46.4882	33.9963	12.0555	23.2291	23.2291	2.53277	6.41914	3.07704	0							1851.7	34.9	33.8	42.3	27.4	27.1	27.2	13	9.5	15.3	0
1851.7	36.1132	46.4997	34.0072	12.0685	23.223	23.223	2.53573	6.41859	3.08049	0							1854.85	34.9	33.8	42.3	27.5	27.1	27.2	13	9.5	15.3	0
1854.85	36.125	46.5144	34.0192	12.0858	23.2122	23.2122	2.54022	6.41627	3.09238	0							1858	35	33.8	42.3	27.6	27.1	27.2	13	9.5	15.4	0
1858	36.1391	46.533	34.0307	12.1013	23.2021	23.2021	2.54959	6.4193	3.09009	0							1861.15	35	33.8	42.3	27.7	27.1	27.2	13	9.5	15.4	0
1861.15	36.1528	46.5496	34.0378	12.1144	23.1981	23.1981	2.55881	6.41888	3.07965	0							1864.3	35	33.9	42.3	27.8	27.1	27.2	13	9.5	15.5	0
1864.3	36.1641	46.5734	34.0448	12.1342	23.1945	23.1945	2.56148	6.41094	3.09226	0							1867.45	35	33.9	42.4	27.9	27.1	27.2	13	9.6	15.5	0
1867.45	36.1726	46.6014	34.0544	12.1597	23.1922	23.1922	2.55197	6.40429	3.09479	0							1870.6	35	33.9	42.4	28	27.1	27.2	13	9.6	15.6	0
1870.6	36.1826	46.6253	34.0649	12.185	23.1955	23.1955	2.53523	6.39735	3.0819	0							1873.75	35	33.9	42.4	28	27.1	27.2	13	9.6	15.6	0
1873.75	36.198	46.6431	34.07	12.2014	23.2105	23.2105	2.50996	6.39106	3.10062	0							1876.9	35	33.9	42.4	28.1	27.1	27.2	13.1	9.6	15.7	0
1876.9	36.2134	46.6639	34.0766	12.2188	23.222	23.222	2.48048	6.38268	3.12829	0							1880.05	35.1	33.9	42.4	28.2	27.2	27.3	13.1	9.6	15.7	0
1880.05	36.2279	46.691	34.0871	12.2289	23.2276	23.2276	2.463	6.37512	3.14672	0							1883.2	35.1	33.9	42.4	28.2	27.2	27.3	13.1	9.6	15.7	0
1883.2	36.244	46.7142	34.0906	12.2273	23.235	23.235	2.46952	6.37324	3.16064	0							1886.35	35.1	33.9	42.4	28.1	27.2	27.3	13.1	9.6	15.7	0
1886.35	36.2565	46.7366	34.093	12.2062	23.241	23.241	2.48021	6.35962	3.14364	0							1889.5	35.1	33.9	42.4	28	27.2	27.3	13.1	9.6	15.8	0
1889.5	36.2689	46.7599	34.0949	12.1784	23.2309	23.2309	2.49659	6.3448	3.11553	0							1892.65	35.2	34	42.4	28	27.2	27.3	13.2	9.6	15.8	0
1892.65	36.2856	46.7757	34.0988	12.1525	23.2198	23.2198	2.52137	6.33539	3.10686	0							1895.8	35.2	34	42.5	27.9	27.2	27.3	13.2	9.6	15.8	0
1895.8	36.3052	46.7866	34.1017	12.1321	23.2099	23.2099	2.54136	6.32249	3.12487	0							1898.95	35.2	34	42.5	27.9	27.2	27.3	13.2	9.6	15.8	0
1898.95	36.327	46.7975	34.1068	12.1278	23.2	23.2	2.55613	6.30792	3.14065	0							1902.1	35.2	34	42.5	28	27.2	27.4	13.2	9.6	15.9	0
1902.1	36.3474	46.8004	34.1217	12.1377	23.1933	23.1933	2.56951	6.30463	3.13946	0							1905.25	35.2	34	42.5	28	27.2	27.4	13.2	9.6	15.9	0
1905.25	36.3677	46.8045	34.1347	12.148	23.192	23.192	2.57283	6.3056	3.13281	0							1908.4	35.2	34	42.5	28	27.2	27.4	13.2	9.6	16	0
1908.4	36.3897	46.809	34.146	12.1427	23.1912	23.1912	2.57098	6.30352	3.12448	0							1911.55	35.3	34	42.5	28.1	27.2	27.4	13.2	9.6	16	0
1911.55	36.4089	46.8197	34.1627	12.1333	23.1811	23.1811	2.57918	6.29691	3.10367	0							1914.7	35.3	34.1	42.6	28.1	27.2	27.4	13.2	9.6	16	0
1914.7	36.4212	46.8367	34.1862	12.1078	23.1706	23.1706	2.5915	6.29108	3.06438	0							1917.85	35.3	34.1	42.6	28.2	27.2	27.5	13.1	9.6	16.1	0
1917.85	36.4308	46.8526	34.2088	12.0641	23.1655	23.1655	2.59679	6.28324	3.00922	0							1921	35.3	34.1	42.6	28.2	27.2	27.5	13.1	9.6	16.1	0
1921	36.4354	46.8686	34.2276	12.0282	23.1575	23.1575	2.58674	6.26861	2.96065	0							1924.15	35.3	34.1	42.6	28.2	27.2	27.5	13.1	9.6	16.2	0
1924.15	36.4378	46.8877	34.2498	11.9999	23.1503	23.1503	2.56506	6.25689	2.91383	0							1927.3	35.3	34.1	42.6	28.2	27.2	27.5	13.1	9.7	16.2	0
1927.3	36.4425	46.9066	34.2715	11.9843	23.1473	23.1473	2.53822	6.24892	2.85893	0							1930.45	35.4	34.2	42.7	28.2	27.2	27.5	13.1	9.7	16.2	0
1930.45	36.4495	46.9252	34.2869	11.987	23.1418	23.1418	2.50847	6.24096	2.81083	0							1933.6	35.4	34.2	42.7	28.2	27.2	27.5	13.1	9.7	16.2	0
1933.6	36.4594	46.9436	34.3011	12	23.1275	23.1275	2.47449	6.23595	2.77233	0							1936.75	35.4	34.2	42.7	28.1	27.2	27.5	13.2	9.7	16.3	0
1936.75	36.4659	46.9599	34.3134	12.0099	23.1096	23.1096	2.45162	6.23626	2.73875	0							1939.9	35.4	34.2	42.7	28.1	27.2	27.5	13.2	9.7	16.3	0
1939.9	36.4758	46.9736	34.324	12.0109	23.0929	23.0929	2.44046	6.23683	2.71184	0							1943.05	35.4	34.2	42.7	28.1	27.2	27.5	13.2	9.7	16.3	0
1943.05	36.4898	46.9877	34.3339	12.0164	23.0721	23.0721	2.43566	6.23229	2.6925	0							1946.2	35.5	34.2	42.7	28.1	27.2	27.6	13.2	9.7	16.3	0
1946.2	36.4998	47.0005	34.3516	12.0286	23.0518	23.0518	2.44738	6.22735	2.68437	0							1949.35	35.5	34.2	42.7	28.2	27.1	27.6	13.2	9.7	16.3	0
1949.35	36.5055	47.0117	34.3729	12.038	23.0422	23.0422	2.46663	6.22642	2.6864	0							1952.5	35.5	34.2	42.8	28.2	27.1	27.6	13.2	9.7	16.3	0
1952.5	36.5108	47.0215	34.3912	12.0439	23.0441	23.0441	2.48624	6.22181	2.69934	0							1955.65	35.5	34.2	42.8	28.2	27.1	27.6	13.2	9.7	16.3	0
1955.65	36.5149	47.0382	34.411	12.0539	23.0479	23.0479	2.5033	6.21145	2.72195	0							1958.8	35.5	34.2	42.8	28.1	27.1	27.6	13.2	9.7	16.4	0
1958.8	36.5157	47.0592	34.4309	12.0675	23.0543	23.0543	2.52537	6.19827	2.73434	0							1961.95	35.5	34.2	42.8	28.1	27.1	27.6	13.2	9.7	16.4	0
1961.95	36.518	47.0795	34.4462	12.0775	23.063	23.063	2.54997	6.18834	2.73137	0							1965.1	35.5	34.3	42.9	28.1	27.2	27.6	13.2	9.7	16.4	0
1965.1	36.5248	47.1002	34.4579	12.0781	23.0648	23.0648	2.56818	6.17794	2.72406	0							1968.25	35.6	34.3	42.9	28.1	27.2	27.6	13.2	9.7	16.4	0
1968.25	36.5348	47.1248	34.4737	12.0729	23.0597	23.0597	2.5836	6.17038	2.70549	0							1971.4	35.6	34.3	42.9	28.1	27.2	27.6	13.3	9.7	16.5	0
1971.4	36.5439	47.1458	34.4858	12.0685	23.05	23.05	2.59768	6.17234	2.67389	0							1974.55	35.6	34.3	42.9	28.1	27.2	27.6	13.3	9.7	16.5	0
1974.55	36.552	47.1596	34.4949	12.0585	23.0337	23.0337	2.59482	6.17149	2.64117	0							1977.7	35.6	34.3	42.9	28.1	27.2	27.7	13.3	9.8	16.4	0
1977.7	36.5605	47.1611	34.5069	12.0593	23.0141	23.0141	2.59808	6.16688	2.61062	0							1980.85	35.6	34.3	42.9	28.2	27.3	27.7	13.3	9.8	16.5	0
1980.85	36.5628	47.1688	34.5267	12.067	22.9972	22.9972	2.60909	6.16643	2.60481	0							1984	35.6	34.3	42.9	28.2	27.3	27.7	13.3	9.8	16.5	0
1984	36.558	47.171	34.5513	12.0708	22.9916	22.9916	2.62428	6.16674	2.57714	0							1987.15	35.7	34.3	42.9	28.4	27.3	27.7	13.3	9.8	16.5	0
1987.15	36.5541	47.1881	34.5642	12.0734	22.9921	22.9921	2.63175	6.16097	2.54969	0							1990.3	35.7	34.3	43	28.7	27.3	27.7	13.3	9.8	16.5	0
1990.3	36.5527	47.2062	34.5807	12.0898	22.9858	22.9858	2.63774	6.15571	2.51562	0							1993.45	35.7	34.4	43	29.1	27.3	27.7	13.3	9.8	16.5	0
1993.45	36.5521	47.2254	34.6035	12.1074	22.9748	22.9748	2.65035	6.15685	2.46895	0							1996.6	35.7	34.4	43	29.6	27.3	27.7	13.3	9.8	16.5	0
1996.6	36.552	47.2409	34.6302	12.1135	22.9624	22.9624	2.66026	6.16457	2.42216	0							1999.75	35.7	34.4	43	30.1	27.3	27.7	13.3	9.8	16.5	0
1999.75	36.559	47.2549	34.6529	12.1329	22.9451	22.9451	2.64944	6.17137	2.378	0							2002.9	35.8	34.4	43	30.6	27.3	27.7	13.3	9.9	16.5	0
2002.9	36.5772	47.2732	34.672	12.1547	22.9169	22.9169	2.62796	6.18238	2.34319	0							2006.05	35.8	34.4	43	30.9	27.4	27.7	13.3	9.9	16.5	0
2006.05	36.5949	47.2828	34.6841	12.1716	22.8815	22.8815	2.59778	6.19522	2.31819	0							2009.2	35.8	34.4	43	30.9	27.4	27.8	13.3	9.9	16.5	0
2009.2	36.6119	47.2897	34.6978	12.1843	22.8469	22.8469	2.5633	6.2001	2.30235	0							2012.35	35.8	34.4	43.1	30.7	27.4	27.8	13.3	9.9	16.5	0
2012.35	36.635	47.3001	34.7184	12.1962	22.8152	22.8152	2.53061	6.19714	2.3005	0							2015.5	35.8	34.5	43.1	30.3	27.4	27.8	13.4	9.9	16.6	0
2015.5	36.6625	47.3102	34.7384	12.1971	22.7885	22.7885	2.50862	6.19844	2.31618	0							2018.65	35.8	34.5	43.1	30.2	27.4	27.8	13.4	10	16.6	0
2018.65	36.6852	47.3206	34.7535	12.1823	22.7733	22.7733	2.49742	6.19717	2.33901	0							2021.8	35.8	34.5	43.1	30	27.4	27.8	13.4	10	16.6	0
2021.8	36.7025	47.3358	34.7624	12.1796	22.7623	22.7623	2.49053	6.19265	2.38604	0							2024.95	35.9	34.5	43.1	29.9	27.4	27.8	13.4	10	16.7	0
2024.95	36.7196	47.3617	34.7781	12.1879	22.7546	22.7546	2.49109	6.1891	2.45335	0							2028.1	35.9	34.6	43.1	29.8	27.4	27.8	13.4	10	16.7	0
2028.1	36.7328	47.3915	34.8004	12.2103	22.7578	22.7578	2.49936	6.18874	2.52426	0							2031.25	35.9	34.6	43.1	29.6	27.4	27.8	13.4	10	16.7	0
2031.25	36.7396	47.4115	34.8177	12.247	22.7724	22.7724	2.50204	6.18312	2.59395	0							2034.4	35.9	34.6	43.2	29.6	27.5	27.8	13.4	10	16.7	0
2034.4	36.747	47.4306	34.8315	12.2876	22.7885	22.7885	2.49675	6.16963	2.64939	0							2037.55	35.9	34.6	43.2	29.6	27.5	27.8	13.4	10	16.8	0
2037.55	36.7532	47.4454	34.8439	12.3292	22.8013	22.8013	2.48833	6.15987	2.6788	0							2040.7	35.9	34.6	43.2	29.5	27.5	27.8	13.4	10	16.8	0
2040.7	36.7565	47.4497	34.8568	12.3579	22.8115	22.8115	2.4762	6.1479	2.67482	0							2043.85	35.9	34.6	43.2	29.4	27.5	27.8	13.4	10	16.8	0
2043.85	36.7594	47.4504	34.8705	12.364	22.8154	22.8154	2.46469	6.13312	2.6505	0							2047	36	34.6	43.2	29.3	27.5	27.8	13.5	10	16.9	0
2047	36.7668	47.4544	34.8818	12.352	22.8081	22.8081	2.45525	6.12524	2.6132	0							2050.15	36	34.6	43.2	29.2	27.5	27.9	13.5	10	16.9	0
2050.15	36.7809	47.461	34.8942	12.3276	22.7925	22.7925	2.45485	6.12592	2.57379	0							2053.3	36	34.6	43.2	29.1	27.4	27.9	13.5	10	17	0
2053.3	36.7981	47.4705	34.9049	12.3031	22.7756	22.7756	2.45619	6.12533	2.5344	0							2056.45	36	34.7	43.2	29.2	27.4	27.9	13.5	10	17	0
2056.45	36.8161	47.4886	34.9193	12.2826	22.7572	22.7572	2.44602	6.11692	2.50521	0							2059.6	36	34.7	43.2	29.2	27.4	27.9	13.4	10	17	0
2059.6	36.8363	47.5123	34.9406	12.2737	22.7425	22.7425	2.44016	6.11378	2.4825	0							2062.75	36.1	34.7	43.2	29.1	27.4	27.9	13.4	10	17	0
2062.75	36.8565	47.5373	34.9644	12.2637	22.7376	22.7376	2.44048	6.1044	2.46192	0							2065.9	36.1	34.7	43.2	29.1	27.4	27.9	13.4	10	17	0
2065.9	36.8715	47.5546	34.9839	12.2562	22.7372	22.7372	2.43809	6.08879	2.44118	0							2069.05	36.1	34.7	43.3	29.1	27.4	27.9	13.4	10	17.1	0
2069.05	36.8825	47.5727	35.0014	12.2505	22.7322	22.7322	2.4348	6.08166	2.43725	0							2072.2	36.1	34.7	43.3	29	27.3	27.9	13.4	10	17.1	0
2072.2	36.8946	47.5857	35.018	12.2539	22.725	22.725	2.43817	6.07476	2.43602	0							2075.35	36.1	34.7	43.3	29	27.3	27.9	13.4	10	17.1	0
2075.35	36.9037	47.5914	35.0277	12.2523	22.7189	22.7189	2.45433	6.06611	2.44063	0							2078.5	36.1	34.8	43.3	28.9	27.3	27.9	13.4	10	17.1	0
2078.5	36.9097	47.6014	35.0381	12.2566	22.7118	22.7118	2.46215	6.05471	2.45763	0							2081.65	36.2	34.8	43.3	29	27.3	28	13.4	10	17.2	0
2081.65	36.9183	47.6106	35.0525	12.2621	22.6994	22.6994	2.4689	6.04931	2.47528	0							2084.8	36.2	34.8	43.3	29.1	27.3	28	13.4	10	17.2	0
2084.8	36.9316	47.62	35.0577	12.2621	22.6873	22.6873	2.47619	6.04868	2.487	0							2087.95	36.2	34.8	43.3	29.3	27.3	28	13.4	10	17.2	0
2087.95	36.9452	47.6266	35.063	12.2598	22.6638	22.6638	2.4658	6.04946	2.49602	0							2091.1	36.2	34.8	43.3	29.4	27.3	28	13.4	10	17.2	0
2091.1	36.9585	47.6388	35.0713	12.269	22.64	22.64	2.45662	6.04867	2.49852	0							2094.25	36.2	34.8	43.4	29.5	27.3	28	13.5	10	17.2	0
2094.25	36.9781	47.6522	35.0824	12.2761	22.6206	22.6206	2.46255	6.05598	2.4932	0							2097.4	36.3	34.8	43.4	29.6	27.3	28	13.5	9.9	17.2	0
2097.4	37.0002	47.6626	35.098	12.2749	22.6124	22.6124	2.4676	6.06377	2.47464	0							2100.55	36.3	34.8	43.4	29.6	27.3	28	13.5	9.9	17.3	0
2100.55	37.0152	47.676	35.1112	12.2753	22.6057	22.6057	2.46684	6.06101	2.45407	0							2103.7	36.3	34.8	43.4	29.6	27.3	28.1	13.5	9.9	17.3	0
2103.7	37.0272	47.6911	35.127	12.2859	22.5878	22.5878	2.46291	6.05505	2.44235	0							2106.85	36.3	34.8	43.4	29.7	27.2	28.1	13.5	9.9	17.3	0
2106.85	37.0377	47.7027	35.1423	12.2906	22.5776	22.5776	2.45695	6.0461	2.42446	0							2110	36.3	34.9	43.4	29.7	27.1	28.1	13.5	9.9	17.3	0
2110	37.0428	47.7171	35.1582	12.2907	22.5777	22.5777	2.44263	6.02483	2.40949	0							2113.15	36.3	34.9	43.4	29.7	27.1	28.1	13.5	10	17.3	0
2113.15	37.0437	47.7362	35.1818	12.2958	22.5769	22.5769	2.41167	5.99462	2.40095	0							2116.3	36.3	34.9	43.4	29.7	27	28.1	13.6	10	17.3	0
2116.3	37.0458	47.7612	35.205	12.3027	22.5732	22.5732	2.37557	5.96825	2.39939	0							2119.45	36.3	34.9	43.4	29.7	27	28.1	13.6	10	17.3	0
2119.45	37.0547	47.7873	35.2236	12.3065	22.5608	22.5608	2.34108	5.94709	2.40348	0							2122.6	36.4	34.9	43.4	29.7	26.9	28.1	13.6	10	17.3	0
2122.6	37.0639	47.812	35.2454	12.3179	22.5482	22.5482	2.31891	5.92493	2.41147	0							2125.75	36.4	35	43.4	29.7	26.9	28.1	13.6	10	17.3	0
2125.75	37.0705	47.8391	35.272	12.3352	22.5415	22.5415	2.31201	5.90595	2.43159	0							2128.9	36.4	35	43.4	29.7	26.9	28.1	13.7	10	17.3	0
2128.9	37.0809	47.8622	35.2978	12.3479	22.5397	22.5397	2.32268	5.89736	2.4575	0							2132.05	36.4	35	43.4	29.7	26.9	28.2	13.7	10	17.3	0
2132.05	37.0968	47.8784	35.3169	12.3573	22.5381	22.5381	2.34468	5.89117	2.48649	0							2135.2	36.5	35	43.4	29.7	26.9	28.2	13.7	10	17.3	0
2135.2	37.1123	47.8925	35.3344	12.3742	22.5254	22.5254	2.36509	5.88624	2.5216	0							2138.35	36.5	35	43.5	29.8	27	28.1	13.7	10	17.4	0
2138.35	37.1269	47.9002	35.357	12.4001	22.5072	22.5072	2.38431	5.8856	2.55158	0							2141.5	36.5	35	43.5	30.1	27	28.1	13.7	10	17.4	0
2141.5	37.1399	47.9037	35.3779	12.42	22.492	22.492	2.40162	5.87765	2.57398	0							2144.65	36.5	35	43.5	30.4	27.1	28.1	13.7	10	17.4	0
2144.65	37.1524	47.909	35.3951	12.4343	22.4762	22.4762	2.40834	5.86516	2.59081	0							2147.8	36.5	35	43.5	30.7	27.1	28.1	13.7	10	17.4	0
2147.8	37.1673	47.9212	35.4131	12.4553	22.4576	22.4576	2.40432	5.85658	2.60596	0							2150.95	36.5	35	43.5	31	27.1	28.1	13.7	10	17.5	0
2150.95	37.1792	47.9361	35.4243	12.4704	22.4404	22.4404	2.39096	5.85336	2.61392	0							2154.1	36.5	35.1	43.5	31.2	27.1	28.1	13.7	10	17.5	0
2154.1	37.1891	47.9458	35.4336	12.4765	22.4282	22.4282	2.37496	5.84932	2.6136	0							2157.25	36.5	35.1	43.5	31.1	27.1	28.1	13.7	10	17.5	0
2157.25	37.1956	47.9619	35.4443	12.4824	22.4171	22.4171	2.35701	5.83476	2.61609	0							2160.4	36.5	35.1	43.5	31	27.1	28.1	13.7	10	17.5	0
2160.4	37.1965	47.9818	35.4517	12.4843	22.4031	22.4031	2.33184	5.82261	2.61937	0							2163.55	36.6	35.1	43.5	30.9	27.1	28.1	13.7	10	17.5	0
2163.55	37.1995	48.0003	35.4595	12.4729	22.4008	22.4008	2.30274	5.81398	2.60458	0							2166.7	36.6	35.1	43.5	30.9	27.1	28.1	13.7	10	17.5	0
2166.7	37.2084	48.0211	35.4634	12.4553	22.3986	22.3986	2.27539	5.79969	2.59181	0							2169.85	36.6	35.1	43.5	30.7	27.1	28.2	13.8	10	17.5	0
2169.85	37.2151	48.0413	35.4736	12.4474	22.3861	22.3861	2.24489	5.78126	2.57985	0							2173	36.6	35.1	43.5	30.7	27.1	28.2	13.8	10	17.5	0
2173	37.2199	48.0587	35.4871	12.4436	22.3772	22.3772	2.22695	5.76804	2.57455	0							2176.15	36.6	35.1	43.5	30.7	27.1	28.2	13.8	10.1	17.5	0
2176.15	37.2242	48.0736	35.4998	12.436	22.375	22.375	2.21859	5.75537	2.58679	0							2179.3	36.7	35.1	43.5	30.7	27.1	28.2	13.8	10.1	17.5	0
2179.3	37.2336	48.0894	35.5075	12.4272	22.3703	22.3703	2.20464	5.74674	2.61594	0							2182.45	36.7	35.2	43.5	30.7	27.2	28.2	13.8	10.1	17.5	0
2182.45	37.2475	48.1085	35.5187	12.4257	22.3606	22.3606	2.19364	5.73359	2.65497	0							2185.6	36.7	35.2	43.6	30.7	27.2	28.2	13.8	10.1	17.5	0
2185.6	37.2595	48.1228	35.5331	12.4252	22.3513	22.3513	2.17893	5.72537	2.68362	0							2188.75	36.7	35.2	43.6	30.7	27.2	28.2	13.8	10.1	17.5	0
2188.75	37.2745	48.131	35.5472	12.426	22.3431	22.3431	2.16545	5.70489	2.70839	0							2191.9	36.7	35.2	43.6	30.7	27.2	28.3	13.8	10.1	17.5	0
2191.9	37.2921	48.1437	35.5655	12.4358	22.3271	22.3271	2.15193	5.68645	2.72877	0							2195.05	36.7	35.2	43.6	30.6	27.2	28.3	13.8	10.1	17.5	0
2195.05	37.3072	48.1576	35.5875	12.4445	22.3093	22.3093	2.13823	5.67457	2.7333	0							2198.2	36.7	35.3	43.6	30.6	27.3	28.3	13.8	10	17.5	0
2198.2	37.3204	48.1694	35.6069	12.4479	22.2921	22.2921	2.12676	5.65827	2.72378	0							2201.35	36.7	35.3	43.6	30.5	27.3	28.3	13.8	10	17.5	0
2201.35	37.3341	48.1796	35.6194	12.4516	22.265	22.265	2.11938	5.638	2.70951	0							2204.5	36.7	35.3	43.6	30.4	27.3	28.4	13.8	10	17.5	0
2204.5	37.348	48.189	35.6375	12.4627	22.2376	22.2376	2.1158	5.61909	2.69826	0							2207.65	36.7	35.3	43.6	30.4	27.3	28.4	13.8	10	17.5	0
2207.65	37.3596	48.1972	35.6607	12.4704	22.2173	22.2173	2.11727	5.60783	2.69125	0							2210.8	36.7	35.3	43.7	30.4	27.3	28.4	13.8	10.1	17.6	0
2210.8	37.3663	48.2083	35.6794	12.4764	22.2063	22.2063	2.11084	5.59493	2.67962	0							2213.95	36.8	35.4	43.7	30.4	27.3	28.4	13.8	10.1	17.6	0
2213.95	37.374	48.2246	35.6947	12.4845	22.1963	22.1963	2.10371	5.58072	2.66341	0							2217.1	36.8	35.4	43.7	30.4	27.3	28.4	13.8	10.1	17.6	0
2217.1	37.3858	48.2391	35.7127	12.4935	22.1827	22.1827	2.10452	5.57388	2.64529	0							2220.25	36.8	35.4	43.7	30.5	27.3	28.4	13.8	10.1	17.6	0
2220.25	37.3939	48.2484	35.7327	12.5002	22.1715	22.1715	2.11157	5.5639	2.62268	0							2223.4	36.8	35.4	43.7	30.6	27.3	28.4	13.8	10.1	17.6	0
2223.4	37.4036	48.2559	35.7473	12.5047	22.1577	22.1577	2.11098	5.54617	2.60881	0							2226.55	36.8	35.4	43.7	30.7	27.3	28.4	13.8	10.1	17.6	0
2226.55	37.4136	48.2641	35.7609	12.5076	22.1335	22.1335	2.10629	5.53417	2.61106	0							2229.7	36.8	35.4	43.7	30.7	27.3	28.4	13.9	10.1	17.6	0
2229.7	37.4181	48.2696	35.771	12.5054	22.1041	22.1041	2.10674	5.52868	2.61932	0							2232.85	36.8	35.4	43.7	30.6	27.3	28.4	13.9	10.1	17.6	0
2232.85	37.4207	48.2728	35.7738	12.4989	22.0752	22.0752	2.10785	5.52842	2.63458	0							2236	36.9	35.4	43.7	30.4	27.3	28.4	13.9	10.2	17.7	0
2236	37.4238	48.2778	35.7772	12.496	22.047	22.047	2.10022	5.5293	2.65485	0							2239.15	36.9	35.4	43.7	30.2	27.4	28.4	13.9	10.2	17.7	0
2239.15	37.4276	48.2868	35.7848	12.4956	22.0262	22.0262	2.08914	5.52974	2.67771	0							2242.3	36.9	35.4	43.8	29.9	27.4	28.4	13.9	10.2	17.7	0
2242.3	37.4331	48.2994	35.7907	12.4925	22.0116	22.0116	2.08048	5.53435	2.69011	0							2245.45	36.9	35.4	43.8	29.7	27.4	28.4	13.9	10.2	17.7	0
2245.45	37.4372	48.3204	35.7965	12.4891	21.9996	21.9996	2.08315	5.52979	2.68772	0							2248.6	36.9	35.5	43.8	29.5	27.4	28.4	13.9	10.2	17.7	0
2248.6	37.4479	48.3469	35.8063	12.4931	21.9793	21.9793	2.08665	5.52192	2.67779	0							2251.75	36.9	35.5	43.8	29.6	27.4	28.4	13.9	10.2	17.7	0
2251.75	37.465	48.3659	35.8232	12.5107	21.9626	21.9626	2.08931	5.51552	2.6693	0							2254.9	36.9	35.5	43.8	29.9	27.5	28.5	14	10.2	17.8	0
2254.9	37.476	48.3797	35.8356	12.5239	21.952	21.952	2.08019	5.49695	2.66806	0							2258.05	36.9	35.5	43.8	30.2	27.5	28.5	14	10.2	17.8	0
2258.05	37.4878	48.3988	35.843	12.5364	21.938	21.938	2.06119	5.47597	2.67434	0							2261.2	37	35.5	43.8	30.5	27.5	28.5	14	10.2	17.8	0
2261.2	37.5019	48.4156	35.8591	12.5553	21.9224	21.9224	2.0441	5.45551	2.68344	0							2264.35	37	35.5	43.8	30.8	27.5	28.5	14	10.2	17.9	0
2264.35	37.5139	48.4313	35.8775	12.5598	21.9115	21.9115	2.03516	5.43919	2.68184	0							2267.5	37	35.5	43.8	30.8	27.5	28.5	14	10.2	17.9	0
2267.5	37.5233	48.4402	35.8941	12.566	21.9013	21.9013	2.02939	5.41651	2.66396	0							2270.65	37	35.5	43.8	30.7	27.5	28.5	14	10.2	17.9	0
2270.65	37.5351	48.4541	35.917	12.5705	21.8905	21.8905	2.02302	5.38833	2.65878	0							2273.8	37	35.6	43.8	30.5	27.5	28.5	14	10.2	17.9	0
2273.8	37.5526	48.4711	35.9411	12.5687	21.876	21.876	2.02772	5.36616	2.65288	0							2276.95	37	35.6	43.8	30.2	27.5	28.5	14	10.2	17.9	0
2276.95	37.5682	48.4837	35.9585	12.5647	21.8599	21.8599	2.03222	5.33963	2.627	0							2280.1	37	35.6	43.8	30	27.5	28.5	14	10.2	17.9	0
2280.1	37.5795	48.4964	35.9769	12.558	21.8409	21.8409	2.02722	5.30993	2.60346	0							2283.25	37.1	35.6	43.9	29.9	27.5	28.6	14	10.2	17.9	0
2283.25	37.5902	48.5094	35.9958	12.5672	21.8159	21.8159	2.01066	5.28744	2.58735	0							2286.4	37.1	35.6	43.9	29.7	27.6	28.6	14	10.2	17.9	0
2286.4	37.6014	48.5232	36.0116	12.5697	21.7978	21.7978	1.9963	5.27316	2.57829	0							2289.55	37.1	35.6	43.9	29.6	27.6	28.6	14	10.2	17.9	0
2289.55	37.609	48.54	36.0239	12.567	21.7871	21.7871	1.97799	5.25785	2.56494	0							2292.7	37.1	35.7	43.9	29.6	27.6	28.7	14	10.2	17.9	0
2292.7	37.6185	48.5613	36.0392	12.5678	21.7726	21.7726	1.94793	5.24612	2.54083	0							2295.85	37.1	35.7	43.9	29.6	27.6	28.7	14	10.2	17.9	0
2295.85	37.6345	48.5813	36.0566	12.5682	21.7594	21.7594	1.9258	5.2415	2.5006	0							2299	37.1	35.7	43.9	29.6	27.6	28.7	14	10.2	17.9	0
2299	37.6478	48.5956	36.0685	12.5671	21.7488	21.7488	1.90907	5.23435	2.46708	0							2302.15	37.1	35.7	44	29.6	27.6	28.7	14	10.2	17.9	0
2302.15	37.6599	48.6086	36.0793	12.5713	21.7406	21.7406	1.88491	5.22041	2.43341	0							2305.3	37.2	35.7	44	29.6	27.6	28.7	14	10.2	17.9	0
2305.3	37.6725	48.6257	36.0935	12.582	21.7353	21.7353	1.86186	5.21022	2.41259	0							2308.45	37.2	35.7	44	29.7	27.6	28.7	14	10.2	18	0
2308.45	37.6859	48.641	36.1089	12.5913	21.7377	21.7377	1.83816	5.20063	2.39243	0							2311.6	37.2	35.7	44	29.7	27.6	28.7	14	10.2	18	0
2311.6	37.6998	48.6501	36.126	12.5982	21.739	21.739	1.80052	5.18649	2.37338	0							2314.75	37.2	35.7	44	29.7	27.6	28.7	14	10.2	18	0
2314.75	37.7072	48.661	36.1439	12.6104	21.7318	21.7318	1.74924	5.17106	2.37174	0							2317.9	37.2	35.7	44	29.7	27.7	28.7	14	10.2	18	0
2317.9	37.7148	48.6729	36.165	12.6198	21.7202	21.7202	1.70873	5.15981	2.39329	0							2321.05	37.2	35.7	44	29.7	27.7	28.7	14	10.3	18	0
2321.05	37.7271	48.6805	36.1787	12.6208	21.7089	21.7089	1.67773	5.15169	2.43062	0							2324.2	37.2	35.7	44	29.7	27.7	28.8	14	10.3	18	0
2324.2	37.7373	48.6866	36.1844	12.6167	21.6921	21.6921	1.64198	5.14015	2.46739	0							2327.35	37.3	35.7	44	29.7	27.7	28.8	14	10.3	18	0
2327.35	37.7481	48.6937	36.1944	12.6123	21.6722	21.6722	1.61618	5.12687	2.49923	0							2330.5	37.3	35.8	44	29.7	27.8	28.8	14	10.3	18	0
2330.5	37.762	48.6975	36.2099	12.6066	21.6496	21.6496	1.61855	5.11974	2.52141	0							2333.65	37.3	35.8	44	29.7	27.8	28.8	14	10.3	18	0
2333.65	37.7764	48.6986	36.2253	12.6013	21.6348	21.6348	1.6258	5.10915	2.52514	0							2336.8	37.3	35.8	44	29.8	27.8	28.8	14	10.4	18	0
2336.8	37.7903	48.7054	36.2412	12.5963	21.6236	21.6236	1.62558	5.09402	2.53805	0							2339.95	37.3	35.8	44	29.7	27.8	28.8	14	10.4	18	0
2339.95	37.8053	48.7154	36.2625	12.5959	21.6136	21.6136	1.6266	5.08629	2.5622	0							2343.1	37.3	35.8	44	29.7	27.8	28.8	14	10.4	18	0
2343.1	37.8265	48.7233	36.28	12.5998	21.6068	21.6068	1.61696	5.08242	2.57447	0							2346.25	37.3	35.8	44.1	29.7	27.8	28.9	14	10.4	18	0
2346.25	37.8472	48.728	36.2914	12.6044	21.5957	21.5957	1.59747	5.0713	2.58236	0							2349.4	37.3	35.8	44.1	29.6	27.8	28.9	14	10.4	18	0
2349.4	37.8611	48.7295	36.3068	12.6156	21.5808	21.5808	1.5761	5.05409	2.59358	0							2352.55	37.3	35.8	44.1	29.6	27.8	28.9	14	10.4	18.1	0
2352.55	37.8765	48.7283	36.319	12.6258	21.567	21.567	1.55366	5.03288	2.59838	0							2355.7	37.4	35.8	44.1	29.7	27.8	28.9	14	10.4	18.1	0
2355.7	37.8924	48.7286	36.3282	12.6321	21.5632	21.5632	1.53135	5.00513	2.59279	0							2358.85	37.4	35.8	44.1	29.8	27.8	28.9	14	10.4	18.2	0
2358.85	37.8997	48.7289	36.338	12.6436	21.5594	21.5594	1.50146	4.97799	2.57304	0							2362	37.4	35.9	44.1	29.8	27.8	28.9	14	10.4	18.2	0
2362	37.9012	48.7424	36.3564	12.6546	21.5545	21.5545	1.49372	4.96125	2.52411	0							2365.15	37.4	35.9	44.1	29.9	27.8	28.9	14.1	10.4	18.2	0
2365.15	37.9057	48.7555	36.3769	12.6594	21.5556	21.5556	1.49528	4.93448	2.4863	0							2368.3	37.4	35.9	44.1	29.9	27.8	28.9	14.1	10.4	18.2	0
2368.3	37.9127	48.7713	36.3918	12.665	21.5589	21.5589	1.48562	4.90589	2.45388	0							2371.45	37.4	35.9	44.1	29.9	27.8	28.9	14.1	10.4	18.2	0
2371.45	37.9214	48.7995	36.3993	12.6601	21.5551	21.5551	1.48751	4.88061	2.44434	0							2374.6	37.5	35.9	44.1	29.9	27.8	28.9	14.1	10.4	18.2	0
2374.6	37.9322	48.8242	36.4118	12.6625	21.5412	21.5412	1.48749	4.86627	2.42817	0							2377.75	37.5	35.9	44.1	29.8	27.8	28.9	14.1	10.4	18.1	0
2377.75	37.9461	48.8419	36.4242	12.6626	21.5285	21.5285	1.48963	4.85152	2.40185	0							2380.9	37.5	35.9	44.1	29.8	27.8	28.9	14.1	10.4	18.1	0
2380.9	37.9583	48.8532	36.4408	12.6591	21.5065	21.5065	1.48449	4.82663	2.35603	0							2384.05	37.5	35.9	44.1	29.8	27.8	28.9	14.1	10.5	18	0
2384.05	37.964	48.868	36.4604	12.6613	21.4635	21.4635	1.46318	4.80408	2.31103	0							2387.2	37.5	35.9	44.1	29.8	27.8	28.9	14.1	10.5	18	0
2387.2	37.9725	48.8842	36.4741	12.6687	21.4015	21.4015	1.4474	4.78676	2.25937	0							2390.35	37.5	35.9	44.1	29.8	27.8	28.9	14.1	10.5	18	0
2390.35	37.9855	48.9038	36.4827	12.6814	21.3211	21.3211	1.4275	4.76611	2.17809	0							2393.5	37.5	35.9	44.1	29.8	27.8	28.9	14	10.5	18	0
2393.5	38.002	48.9299	36.4951	12.6947	21.2355	21.2355	1.39525	4.74108	2.1231	0							2396.65	37.5	36	44.1	29.9	27.8	29	14	10.5	18	0
2396.65	38.0185	48.9544	36.5148	12.7069	21.1392	21.1392	1.35967	4.71394	2.08344	0							2399.8	37.5	36	44.1	29.9	27.8	29	14	10.5	18	0
2399.8	38.0352	48.9688	36.5368	12.7108	21.056	21.056	1.31324	4.684	2.05821	0							2402.95	37.5	36	44.1	29.9	27.9	29	14	10.5	18	0
2402.95	38.0559	48.9791	36.5509	12.707	20.9923	20.9923	1.27343	4.64812	2.04895	0							2406.1	37.5	36	44.1	29.9	27.9	29.1	14	10.5	18	0
2406.1	38.0771	48.9899	36.5689	12.7055	20.9461	20.9461	1.24088	4.61557	2.03312	0							2409.25	37.5	36	44.1	30	27.9	29.1	14	10.5	18	0
2409.25	38.0919	48.9961	36.5909	12.7016	20.9202	20.9202	1.2265	4.59116	2.00386	0							2412.4	37.5	36	44.1	30	27.9	29.1	14	10.5	17.9	0
2412.4	38.1036	48.995	36.6143	12.6953	20.9091	20.9091	1.21816	4.56403	1.97462	0							2415.55	37.6	36	44.1	30.1	28	29.1	14	10.5	17.9	0
2415.55	38.1143	48.9933	36.6371	12.6957	20.898	20.898	1.19485	4.53742	1.95202	0							2418.7	37.6	36	44.2	30.2	28	29.1	14	10.6	17.9	0
2418.7	38.1223	48.9966	36.6555	12.7021	20.8855	20.8855	1.17347	4.51956	1.93675	0							2421.85	37.6	36	44.2	30.3	28	29.1	14	10.6	17.9	0
2421.85	38.1299	48.9991	36.6666	12.7089	20.8716	20.8716	1.15811	4.50772	1.91546	0							2425	37.6	36	44.2	30.3	28	29.1	14	10.6	17.9	0
2425	38.1394	49.0061	36.6751	12.7141	20.854	20.854	1.1499	4.48969	1.89685	0							2428.15	37.7	36.1	44.2	30.2	28	29.1	14	10.6	17.9	0
2428.15	38.1517	49.021	36.6894	12.723	20.8256	20.8256	1.14015	4.4751	1.8961	0							2431.3	37.7	36.1	44.2	30.1	28.1	29.1	14	10.6	17.9	0
2431.3	38.1608	49.0341	36.7084	12.7325	20.804	20.804	1.12146	4.46692	1.90451	0							2434.45	37.7	36.1	44.2	30.1	28.1	29.1	14	10.7	17.9	0
2434.45	38.1633	49.047	36.7199	12.7274	20.7852	20.7852	1.09552	4.45182	1.90396	0							2437.6	37.7	36.1	44.2	30.1	28.1	29.1	14.1	10.7	17.9	0
2437.6	38.1691	49.0633	36.7324	12.7184	20.7635	20.7635	1.06803	4.4313	1.8934	0							2440.75	37.7	36.1	44.2	30.2	28.1	29.1	14.1	10.7	17.9	0
2440.75	38.1758	49.08	36.7459	12.7101	20.7442	20.7442	1.04541	4.41	1.85164	0							2443.9	37.7	36.1	44.3	30.2	28.1	29.1	14.1	10.7	17.9	0
2443.9	38.1828	49.0909	36.7564	12.7	20.7342	20.7342	1.01938	4.3885	1.80878	0							2447.05	37.7	36.1	44.3	30.3	28.1	29.1	14.1	10.7	17.9	0
2447.05	38.1954	49.0962	36.7643	12.6929	20.7281	20.7281	0.99668	4.36728	1.75401	0							2450.2	37.7	36.1	44.3	30.4	28.1	29.1	14.1	10.6	17.9	0
2450.2	38.2109	49.104	36.7674	12.6896	20.7141	20.7141	0.98066	4.34968	1.7091	0							2453.35	37.8	36.2	44.3	30.4	28.1	29.1	14.1	10.6	17.9	0
2453.35	38.2275	49.1131	36.7682	12.6982	20.6952	20.6952	0.99656	4.33507	1.69252	0							2456.5	37.8	36.2	44.3	30.2	28.1	29.1	14.1	10.6	17.9	0
2456.5	38.241	49.121	36.7691	12.7103	20.6754	20.6754	1.01704	4.31938	1.69888	0							2459.65	37.8	36.2	44.3	30.1	28.1	29.1	14	10.6	17.9	0
2459.65	38.2508	49.135	36.7704	12.7239	20.6457	20.6457	1.03713	4.29428	1.76226	0							2462.8	37.8	36.2	44.3	29.9	28.2	29.1	14.1	10.6	17.9	0
2462.8	38.2641	49.155	36.7804	12.7366	20.6101	20.6101	1.05125	4.2749	1.83582	0							2465.95	37.8	36.2	44.3	29.8	28.2	29.1	14.1	10.6	17.9	0
2465.95	38.2745	49.1669	36.801	12.7434	20.5836	20.5836	1.0536	4.25571	1.89405	0							2469.1	37.8	36.2	44.3	29.7	28.2	29.1	14.1	10.6	17.9	0
2469.1	38.2819	49.1756	36.8174	12.7326	20.5679	20.5679	1.04888	4.23	1.92991	0							2472.25	37.8	36.2	44.3	29.8	28.2	29.1	14.1	10.6	17.9	0
2472.25	38.2929	49.1872	36.8367	12.725	20.5581	20.5581	1.02683	4.20381	1.94636	0							2475.4	37.8	36.3	44.3	29.9	28.2	29.1	14.1	10.6	17.9	0
2475.4	38.304	49.201	36.8573	12.722	20.5495	20.5495	0.99254	4.18327	1.94575	0							2478.55	37.8	36.3	44.3	30	28.2	29.1	14.1	10.6	17.9	0
2478.55	38.3145	49.2071	36.8718	12.7184	20.5429	20.5429	0.97029	4.17186	1.94253	0							2481.7	37.8	36.3	44.3	30	28.2	29.1	14.1	10.6	17.9	0
2481.7	38.3281	49.216	36.8795	12.7155	20.5328	20.5328	0.95073	4.15098	1.93394	0							2484.85	37.8	36.3	44.4	30	28.2	29.1	14.1	10.6	17.9	0
2484.85	38.3434	49.2294	36.8893	12.7184	20.5183	20.5183	0.93721	4.12967	1.91735	0							2488	37.9	36.4	44.4	30.1	28.2	29.1	14.1	10.6	17.9	0
2488	38.3559	49.2425	36.9023	12.7306	20.4983	20.4983	0.94031	4.11059	1.88546	0							2491.15	37.9	36.4	44.4	30.1	28.3	29.1	14.1	10.6	17.8	0
2491.15	38.364	49.2599	36.9161	12.7413	20.4746	20.4746	0.96319	4.07923	1.86368	0							2494.3	37.9	36.4	44.4	30.1	28.3	29.1	14.1	10.7	17.8	0
2494.3	38.372	49.2762	36.9333	12.7498	20.4521	20.4521	0.99718	4.04358	1.84857	0							2497.45	37.9	36.4	44.4	30.1	28.3	29.1	14.1	10.6	17.8	0
2497.45	38.3866	49.2893	36.9577	12.7594	20.4332	20.4332	1.01158	4.01536	1.85193	0							2500.6	37.9	36.4	44.4	30	28.3	29.1	14.1	10.6	17.8	0
2500.6	38.3992	49.2946	36.98	12.7649	20.4264	20.4264	1.0114	3.99193	1.86561	0							2503.75	37.9	36.4	44.4	29.9	28.3	29.1	14.1	10.7	17.8	0
2503.75	38.405	49.3016	36.9967	12.7701	20.4313	20.4313	0.99259	3.96787	1.89977	0							2506.9	38	36.4	44.4	29.7	28.3	29.1	14.1	10.7	17.7	0
2506.9	38.4109	49.3113	37.0152	12.7798	20.4323	20.4323	0.95413	3.94761	1.94338	0							2510.05	38	36.4	44.4	29.6	28.3	29.1	14.1	10.6	17.8	0
2510.05	38.4195	49.318	37.0367	12.7861	20.43	20.43	0.91906	3.92802	1.97419	0							2513.2	38	36.4	44.4	29.5	28.4	29.1	14.1	10.6	17.8	0
2513.2	38.431	49.3214	37.0539	12.7871	20.4302	20.4302	0.88643	3.90712	1.99558	0							2516.35	38	36.4	44.5	29.5	28.4	29.1	14.1	10.6	17.8	0
2516.35	38.4403	49.3284	37.0661	12.7842	20.4292	20.4292	0.84977	3.89526	2.00553	0							2519.5	38	36.4	44.5	29.5	28.4	29.1	14.1	10.7	17.8	0
2519.5	38.4475	49.3377	37.0787	12.781	20.4213	20.4213	0.81391	3.88827	2.00847	0							2522.65	38	36.5	44.5	29.5	28.4	29.2	14.1	10.7	17.8	0
2522.65	38.4571	49.3469	37.0951	12.7757	20.4053	20.4053	0.78434	3.87564	2.00494	0							2525.8	38	36.5	44.5	29.5	28.4	29.2	14.1	10.7	17.8	0
2525.8	38.466	49.3582	37.1047	12.7657	20.3812	20.3812	0.75526	3.86338	2.00533	0							2528.95	38	36.5	44.5	29.5	28.4	29.2	14.1	10.7	17.7	0
2528.95	38.4785	49.3733	37.1109	12.7626	20.3549	20.3549	0.71923	3.85272	2.03054	0							2532.1	38.1	36.6	44.5	29.5	28.4	29.2	14.1	10.7	17.7	0
2532.1	38.4968	49.3896	37.1172	12.7699	20.3335	20.3335	0.68731	3.84455	2.06665	0							2535.25	38.1	36.6	44.5	29.4	28.5	29.2	14.1	10.7	17.7	0
2535.25	38.5126	49.4041	37.118	12.7785	20.3197	20.3197	0.66482	3.82747	2.08975	0							2538.4	38.1	36.6	44.5	29.5	28.5	29.2	14.1	10.7	17.6	0
2538.4	38.5263	49.4199	37.1157	12.7903	20.3012	20.3012	0.64323	3.79538	2.10661	0							2541.55	38.1	36.6	44.5	29.6	28.5	29.2	14.2	10.7	17.6	0
2541.55	38.5425	49.4405	37.1186	12.8048	20.2793	20.2793	0.63248	3.7534	2.11362	0							2544.7	38.1	36.6	44.5	29.7	28.5	29.2	14.2	10.7	17.6	0
2544.7	38.5621	49.4511	37.13	12.8158	20.2662	20.2662	0.6324	3.71297	2.10742	0							2547.85	38.1	36.6	44.5	29.8	28.6	29.3	14.2	10.7	17.6	0
2547.85	38.58	49.4615	37.1405	12.8141	20.2608	20.2608	0.62415	3.66982	2.0896	0							2551	38.1	36.6	44.5	29.8	28.6	29.3	14.2	10.7	17.6	0
2551	38.5941	49.4742	37.1532	12.8189	20.2476	20.2476	0.62136	3.62454	2.07238	0							2554.15	38.1	36.6	44.5	29.8	28.6	29.3	14.2	10.7	17.6	0
2554.15	38.6068	49.4916	37.1724	12.825	20.2295	20.2295	0.63835	3.59017	2.05435	0							2557.3	38.1	36.6	44.5	29.8	28.6	29.3	14.2	10.7	17.6	0
2557.3	38.6184	49.5072	37.1873	12.8287	20.2064	20.2064	0.64217	3.5628	2.03951	0							2560.45	38.1	36.6	44.5	29.8	28.6	29.3	14.2	10.7	17.5	0
2560.45	38.6263	49.5247	37.2032	12.8302	20.1714	20.1714	0.64043	3.53713	2.02782	0							2563.6	38.1	36.7	44.5	29.8	28.6	29.3	14.2	10.7	17.5	0
2563.6	38.6332	49.5405	37.2189	12.84	20.138	20.138	0.63672	3.51369	2.0438	0							2566.75	38.2	36.7	44.5	29.9	28.6	29.3	14.2	10.7	17.5	0
2566.75	38.6447	49.5601	37.2304	12.8472	20.1095	20.1095	0.65642	3.50794	2.04959	0							2569.9	38.2	36.7	44.5	30.1	28.6	29.3	14.2	10.7	17.5	0
2569.9	38.6574	49.5671	37.2403	12.8468	20.0885	20.0885	0.68003	3.49761	2.05085	0							2573.05	38.2	36.7	44.5	30.2	28.6	29.3	14.2	10.7	17.4	0
2573.05	38.666	49.5767	37.2529	12.8483	20.0701	20.0701	0.69	3.48628	2.07178	0							2576.2	38.2	36.7	44.5	30.2	28.6	29.3	14.2	10.7	17.4	0
2576.2	38.6727	49.5791	37.2665	12.8516	20.0605	20.0605	0.70809	3.48459	2.09656	0							2579.35	38.2	36.7	44.6	30.1	28.6	29.3	14.2	10.7	17.4	0
2579.35	38.6794	49.582	37.2772	12.8514	20.0649	20.0649	0.72446	3.48639	2.09936	0							2582.5	38.2	36.8	44.6	30	28.6	29.3	14.2	10.7	17.4	0
2582.5	38.6871	49.5882	37.2837	12.8453	20.0715	20.0715	0.73561	3.48477	2.10193	0							2585.65	38.2	36.8	44.6	29.9	28.6	29.3	14.2	10.7	17.4	0
2585.65	38.6953	49.6016	37.2914	12.8488	20.0648	20.0648	0.73309	3.48644	2.1124	0							2588.8	38.2	36.8	44.6	29.9	28.6	29.3	14.2	10.7	17.4	0
2588.8	38.701	49.6243	37.302	12.8626	20.0509	20.0509	0.71294	3.50063	2.12484	0							2591.95	38.3	36.8	44.6	29.9	28.6	29.3	14.2	10.7	17.4	0
2591.95	38.709	49.6484	37.3114	12.8739	20.0412	20.0412	0.67666	3.50803	2.15262	0							2595.1	38.3	36.8	44.6	29.9	28.7	29.4	14.2	10.7	17.4	0
2595.1	38.7156	49.6712	37.3224	12.8806	20.0379	20.0379	0.62706	3.51285	2.16834	0							2598.25	38.3	36.8	44.6	29.9	28.7	29.4	14.2	10.7	17.5	0
2598.25	38.7198	49.6918	37.3354	12.8839	20.0426	20.0426	0.5795	3.5158	2.17419	0							2601.4	38.3	36.8	44.6	29.9	28.7	29.4	14.2	10.7	17.5	0
2601.4	38.7323	49.706	37.3471	12.8802	20.0469	20.0469	0.54378	3.51863	2.16981	0							2604.55	38.3	36.8	44.6	29.9	28.7	29.4	14.2	10.7	17.5	0
2604.55	38.7441	49.7147	37.3588	12.8792	20.0465	20.0465	0.5101	3.5049	2.18215	0							2607.7	38.3	36.8	44.6	29.9	28.7	29.4	14.2	10.7	17.5	0
2607.7	38.7488	49.7179	37.3696	12.8803	20.0407	20.0407	0.48496	3.48026	2.19906	0							2610.85	38.4	36.8	44.6	29.9	28.7	29.4	14.2	10.7	17.5	0
2610.85	38.7547	49.7112	37.3788	12.8757	20.0395	20.0395	0.46713	3.45993	2.2012	0							2614	38.4	36.9	44.6	29.8	28.7	29.4	14.2	10.7	17.5	0
2614	38.763	49.7045	37.3859	12.8646	20.0426	20.0426	0.45716	3.43958	2.19209	0							2617.15	38.4	36.9	44.7	29.8	28.6	29.4	14.2	10.7	17.5	0
2617.15	38.777	49.7023	37.395	12.8574	20.0427	20.0427	0.4536	3.42075	2.18417	0							2620.3	38.4	36.9	44.7	29.8	28.6	29.4	14.2	10.7	17.5	0
2620.3	38.7882	49.7054	37.4127	12.8634	20.0383	20.0383	0.44975	3.41356	2.17348	0							2623.45	38.4	36.9	44.7	29.9	28.6	29.4	14.2	10.7	17.5	0
2623.45	38.7918	49.7155	37.4298	12.8696	20.0321	20.0321	0.45613	3.41788	2.15798	0							2626.6	38.4	36.9	44.7	30.1	28.6	29.4	14.2	10.8	17.5	0
2626.6	38.8042	49.7265	37.4423	12.8722	20.0267	20.0267	0.46007	3.42462	2.14026	0							2629.75	38.4	37	44.7	30.3	28.6	29.4	14.1	10.8	17.4	0
2629.75	38.8148	49.7456	37.457	12.8795	20.0182	20.0182	0.4628	3.42692	2.12831	0							2632.9	38.4	37	44.7	30.5	28.7	29.4	14.1	10.8	17.4	0
2632.9	38.8257	49.7657	37.4765	12.8871	19.9998	19.9998	0.47944	3.43009	2.11871	0							2636.05	38.4	37	44.7	30.5	28.7	29.4	14.1	10.8	17.4	0
2636.05	38.8409	49.7831	37.4959	12.9019	19.9781	19.9781	0.49042	3.42852	2.11158	0							2639.2	38.4	37	44.7	30.4	28.7	29.4	14.1	10.8	17.4	0
2639.2	38.8493	49.8034	37.5079	12.9216	19.9528	19.9528	0.49401	3.42461	2.11916	0							2642.35	38.4	37	44.7	30.2	28.7	29.5	14.1	10.8	17.4	0
2642.35	38.8585	49.8182	37.5175	12.9445	19.9247	19.9247	0.50285	3.4303	2.13133	0							2645.5	38.4	37	44.7	30	28.7	29.5	14.1	10.8	17.4	0
2645.5	38.8678	49.8282	37.5308	12.968	19.8992	19.8992	0.50287	3.45099	2.12934	0							2648.65	38.5	37	44.7	29.8	28.7	29.4	14.1	10.8	17.3	0
2648.65	38.8794	49.8386	37.5417	12.9716	19.8875	19.8875	0.49623	3.47401	2.10751	0							2651.8	38.5	37	44.7	29.7	28.7	29.4	14.1	10.8	17.3	0
2651.8	38.8949	49.8545	37.5548	12.9705	19.8696	19.8696	0.47795	3.49796	2.09384	0							2654.95	38.5	37	44.8	29.7	28.7	29.4	14.1	10.8	17.3	0
2654.95	38.9057	49.8726	37.5692	12.9701	19.8448	19.8448	0.45425	3.52091	2.08569	0							2658.1	38.5	37	44.8	29.7	28.7	29.4	14.1	10.8	17.3	0
2658.1	38.9148	49.8914	37.5793	12.9633	19.8185	19.8185	0.42473	3.53527	2.06807	0							2661.25	38.5	37	44.8	30	28.7	29.4	14.1	10.8	17.3	0
2661.25	38.9252	49.903	37.5862	12.9517	19.795	19.795	0.40722	3.52323	2.06552	0							2664.4	38.5	37	44.8	30.2	28.7	29.4	14.1	10.8	17.3	0
2664.4	38.933	49.9189	37.5955	12.9491	19.757	19.757	0.40996	3.47756	2.08351	0							2667.55	38.5	37.1	44.8	30.5	28.7	29.4	14.1	10.8	17.3	0
2667.55	38.9385	49.9287	37.617	12.955	19.716	19.716	0.44002	3.41323	2.0759	0							2670.7	38.5	37.1	44.8	30.9	28.8	29.4	14.1	10.8	17.3	0
2670.7	38.9483	49.934	37.6318	12.9723	19.6788	19.6788	0.46086	3.34463	2.06098	0							2673.85	38.5	37.1	44.8	31.1	28.8	29.4	14.1	10.8	17.3	0
2673.85	38.9647	49.9406	37.6438	12.9891	19.6433	19.6433	0.48117	3.26993	2.03984	0							2677	38.5	37.1	44.8	31	28.8	29.4	14.1	10.8	17.2	0
2677	38.9834	49.9443	37.6604	13.0031	19.611	19.611	0.48694	3.21213	1.98908	0							2680.15	38.5	37.1	44.8	30.6	28.9	29.4	14.1	10.8	17.2	0
2680.15	38.9974	49.9471	37.6746	13.0089	19.5939	19.5939	0.46995	3.17539	1.93256	0							2683.3	38.6	37.1	44.8	30.4	28.9	29.4	14	10.8	17.2	0
2683.3	39.012	49.9523	37.689	13.0065	19.5725	19.5725	0.42919	3.15812	1.87039	0							2686.45	38.6	37.2	44.8	30.1	28.9	29.4	14	10.8	17.1	0
2686.45	39.032	49.9615	37.7084	13.009	19.543	19.543	0.37167	3.15506	1.82634	0							2689.6	38.6	37.2	44.8	30	28.9	29.5	14	10.8	17.1	0
2689.6	39.0492	49.9746	37.7283	13.0157	19.5174	19.5174	0.32263	3.15575	1.80195	0							2692.75	38.6	37.2	44.8	30.1	28.9	29.5	13.9	10.8	17.1	0
2692.75	39.0575	49.9855	37.7447	13.0194	19.5006	19.5006	0.28261	3.15027	1.79225	0							2695.9	38.6	37.2	44.9	30.2	28.9	29.5	13.9	10.8	17	0
2695.9	39.0676	49.9967	37.7584	13.0245	19.4894	19.4894	0.26246	3.12708	1.80221	0							2699.05	38.6	37.2	44.9	30.4	28.9	29.5	13.8	10.8	17	0
2699.05	39.0749	50.0079	37.7746	13.0365	19.4795	19.4795	0.2635	3.10065	1.82579	0							2702.2	38.6	37.2	44.9	30.6	28.9	29.5	13.8	10.8	17	0
2702.2	39.0822	50.0152	37.7862	13.048	19.4728	19.4728	0.28397	3.07147	1.85189	0							2705.35	38.7	37.2	44.9	30.8	28.9	29.5	13.7	10.8	16.9	0
2705.35	39.0955	50.0209	37.7877	13.055	19.4632	19.4632	0.32225	3.02613	1.90254	0							2708.5	38.7	37.2	44.9	31	28.9	29.5	13.7	10.9	16.9	0
2708.5	39.1098	50.0254	37.7904	13.0637	19.4451	19.4451	0.35911	2.96711	1.9729	0							2711.65	38.7	37.2	44.9	31.1	28.9	29.5	13.7	10.9	16.9	0
2711.65	39.1235	50.0292	37.796	13.066	19.4256	19.4256	0.39132	2.90893	2.03209	0							2714.8	38.7	37.2	44.9	31.1	29	29.5	13.7	10.9	16.8	0
2714.8	39.1316	50.0318	37.807	13.0659	19.4065	19.4065	0.42706	2.85725	2.08657	0							2717.95	38.7	37.2	44.9	31	29	29.5	13.7	10.9	16.8	0
2717.95	39.1352	50.0384	37.8226	13.0694	19.3836	19.3836	0.44502	2.80558	2.13353	0							2721.1	38.7	37.2	44.9	30.9	29	29.5	13.7	10.8	16.8	0
2721.1	39.1453	50.0527	37.8384	13.0753	19.3591	19.3591	0.44807	2.76591	2.1597	0							2724.25	38.7	37.2	44.9	30.8	29	29.5	13.7	10.9	16.8	0
2724.25	39.1543	50.0698	37.8583	13.0761	19.3425	19.3425	0.44703	2.7458	2.1558	0							2727.4	38.7	37.2	44.9	30.7	29	29.5	13.6	10.9	16.8	0
2727.4	39.1544	50.0864	37.8742	13.0677	19.3363	19.3363	0.4492	2.72523	2.12222	0							2730.55	38.7	37.2	44.9	30.6	29	29.5	13.6	10.9	16.8	0
2730.55	39.1521	50.1028	37.8877	13.0671	19.3333	19.3333	0.45226	2.70973	2.07389	0							2733.7	38.7	37.2	44.9	30.5	29	29.5	13.6	10.9	16.8	0
2733.7	39.1538	50.1167	37.9004	13.0687	19.3303	19.3303	0.45021	2.70406	2.03265	0							2736.85	38.7	37.2	44.9	30.4	29	29.5	13.6	10.8	16.8	0
2736.85	39.1553	50.1213	37.9048	13.0698	19.3275	19.3275	0.4442	2.69213	1.99937	0							2740	38.7	37.2	44.9	30.3	29.1	29.6	13.6	10.8	16.8	0
2740	39.1623	50.1243	37.9064	13.0741	19.3225	19.3225	0.42529	2.68167	1.97655	0							2743.15	38.7	37.2	45	30.1	29.1	29.6	13.5	10.8	16.8	0
2743.15	39.1732	50.1263	37.9143	13.0741	19.3186	19.3186	0.37583	2.66917	1.95991	0							2746.3	38.7	37.2	45	30	29.1	29.6	13.5	10.8	16.8	0
2746.3	39.1849	50.129	37.9287	13.0761	19.3123	19.3123	0.32525	2.66573	1.94306	0							2749.45	38.7	37.2	45	30.1	29.2	29.6	13.5	10.8	16.8	0
2749.45	39.1982	50.1312	37.9434	13.0846	19.3092	19.3092	0.2809	2.66853	1.93115	0							2752.6	38.8	37.3	45	30.5	29.2	29.6	13.5	10.8	16.8	0
2752.6	39.2103	50.1402	37.9564	13.0947	19.2972	19.2972	0.22604	2.67647	1.92833	0							2755.75	38.8	37.3	45	30.7	29.2	29.6	13.5	10.8	16.8	0
2755.75	39.2269	50.1574	37.9667	13.1078	19.2826	19.2826	0.1755	2.68719	1.93255	0							2758.9	38.8	37.3	45	31.1	29.3	29.6	13.5	10.8	16.8	0
2758.9	39.2431	50.1721	37.9729	13.1146	19.2708	19.2708	0.14269	2.69492	1.92016	0							2762.05	38.8	37.3	45	31.5	29.3	29.6	13.5	10.8	16.8	0
2762.05	39.2487	50.187	37.9778	13.1095	19.2559	19.2559	0.12035	2.69151	1.91003	0							2765.2	38.8	37.3	45	31.6	29.3	29.6	13.5	10.8	16.8	0
2765.2	39.2503	50.1984	37.9854	13.1114	19.2322	19.2322	0.11354	2.68432	1.89261	0							2768.35	38.8	37.3	45	31.4	29.3	29.6	13.5	10.9	16.8	0
2768.35	39.254	50.2075	37.9906	13.1083	19.2065	19.2065	0.11814	2.67957	1.86604	0							2771.5	38.8	37.3	45	30.9	29.2	29.6	13.5	10.9	16.8	0
2771.5	39.2628	50.2121	37.993	13.1067	19.1848	19.1848	0.11332	2.66451	1.83985	0							2774.65	38.8	37.3	45	30.6	29.1	29.6	13.5	10.9	16.8	0
2774.65	39.2791	50.2098	37.9966	13.1037	19.1668	19.1668	0.10357	2.63615	1.82322	0							2777.8	38.8	37.3	45	30.4	29	29.7	13.4	10.9	16.8	0
2777.8	39.2886	50.2107	38.0067	13.1012	19.1488	19.1488	0.105	2.60191	1.81849	0							2780.95	38.8	37.3	45	30.3	28.9	29.7	13.4	11	16.8	0
2780.95	39.2962	50.2126	38.0202	13.1041	19.1349	19.1349	0.10865	2.57275	1.80458	0							2784.1	38.8	37.3	45	30.3	28.8	29.7	13.4	11	16.8	0
2784.1	39.2991	50.2162	38.0298	13.11	19.1282	19.1282	0.10461	2.54486	1.78982	0							2787.25	38.8	37.3	45.1	30.5	28.8	29.7	13.4	11	16.8	0
2787.25	39.2999	50.2297	38.0376	13.1237	19.1198	19.1198	0.08886	2.5185	1.76031	0							2790.4	38.9	37.3	45.1	30.9	28.7	29.7	13.4	11	16.8	0
2790.4	39.3065	50.2464	38.0502	13.1345	19.1113	19.1113	0.06914	2.504	1.70649	0							2793.55	38.9	37.3	45.1	31.2	28.8	29.7	13.4	11	16.8	0
2793.55	39.3166	50.2624	38.0641	13.1374	19.1065	19.1065	0.04467	2.50234	1.66035	0							2796.7	38.9	37.3	45.1	31.4	28.8	29.7	13.4	11	16.8	0
2796.7	39.3267	50.2791	38.0763	13.1432	19.0978	19.0978	0.01065	2.52155	1.61512	0							2799.85	38.9	37.3	45.1	31.5	28.8	29.7	13.4	11	16.8	0
2799.85	39.3408	50.293	38.0897	13.1519	19.0844	19.0844	0	2.54848	1.57869	0							2803	38.9	37.3	45.1	31.4	28.8	29.7	13.4	11	16.8	0
2803	39.3582	50.3047	38.0982	13.1559	19.0707	19.0707	0	2.57167	1.56263	0							2806.15	38.9	37.3	45.1	31.2	28.9	29.7	13.5	11	16.7	0
2806.15	39.3779	50.3095	38.1004	13.1515	19.0534	19.0534	0	2.58764	1.56843	0							2809.3	38.9	37.3	45.1	31	28.9	29.7	13.5	11	16.7	0
2809.3	39.3986	50.3132	38.1064	13.1473	19.0269	19.0269	0	2.59886	1.59151	0							2812.45	38.9	37.3	45.1	30.9	29	29.7	13.5	10.9	16.7	0
2812.45	39.4151	50.3198	38.117	13.1489	18.9937	18.9937	0	2.60605	1.61395	0							2815.6	38.9	37.4	45.1	30.7	29	29.8	13.5	10.9	16.7	0
2815.6	39.4273	50.3244	38.1278	13.1511	18.9623	18.9623	0	2.61489	1.63374	0							2818.75	38.9	37.4	45.1	30.6	29	29.8	13.5	10.9	16.8	0
2818.75	39.4317	50.3307	38.1382	13.1567	18.9254	18.9254	0	2.61216	1.6451	0							2821.9	38.9	37.4	45.1	30.4	29	29.8	13.5	10.9	16.8	0
2821.9	39.4331	50.3402	38.152	13.1713	18.8813	18.8813	0	2.58926	1.63954	0							2825.05	38.9	37.4	45.1	30.3	29	29.9	13.5	10.9	16.8	0
2825.05	39.4387	50.3451	38.1683	13.185	18.8452	18.8452	0	2.5524	1.61005	0							2828.2	38.9	37.4	45.1	30.2	29	29.9	13.5	10.9	16.9	0
2828.2	39.4498	50.3518	38.1804	13.1909	18.815	18.815	0	2.51776	1.5495	0							2831.35	39	37.4	45.1	30.1	29	29.9	13.4	10.9	16.9	0
2831.35	39.46	50.3593	38.1908	13.1991	18.7901	18.7901	0	2.48948	1.46352	0							2834.5	39	37.4	45.1	30	29	29.9	13.4	10.9	16.9	0
2834.5	39.4658	50.3708	38.1972	13.2052	18.7722	18.7722	0	2.47591	1.37532	0							2837.65	39	37.4	45.1	30	29	29.9	13.4	10.9	16.9	0
2837.65	39.4684	50.3832	38.2012	13.1981	18.7624	18.7624	0	2.48414	1.29589	0							2840.8	39	37.4	45.2	30	29	29.9	13.4	10.9	17	0
2840.8	39.4786	50.397	38.2042	13.1876	18.7576	18.7576	0	2.48752	1.21459	0							2843.95	39	37.4	45.2	30	29	29.9	13.4	10.9	17	0
2843.95	39.4903	50.4144	38.2143	13.1836	18.7489	18.7489	0	2.49128	1.15336	0							2847.1	39.1	37.4	45.2	30.1	29	29.9	13.5	10.9	17	0
2847.1	39.4989	50.4333	38.2319	13.199	18.7315	18.7315	0	2.49874	1.10699	0							2850.25	39.1	37.4	45.2	30.1	29	29.9	13.5	10.9	17	0
2850.25	39.5059	50.4401	38.2462	13.2051	18.7125	18.7125	0	2.49763	1.05771	0							2853.4	39.1	37.4	45.2	30.2	29	29.9	13.5	10.9	16.9	0
2853.4	39.5072	50.4463	38.2577	13.2109	18.6797	18.6797	0	2.48798	1.02903	0							2856.55	39.1	37.4	45.2	30.2	29	29.9	13.5	10.9	16.9	0
2856.55	39.5065	50.4475	38.272	13.222	18.6373	18.6373	0	2.45898	1.02748	0							2859.7	39.1	37.4	45.2	30.3	29	29.9	13.5	10.9	16.9	0
2859.7	39.5121	50.4497	38.2881	13.2245	18.6026	18.6026	0	2.42871	1.04751	0							2862.85	39.1	37.4	45.2	30.3	29.1	29.9	13.4	10.9	16.9	0
2862.85	39.5219	50.4512	38.2973	13.2358	18.5735	18.5735	0	2.40357	1.10362	0							2866	39.1	37.4	45.2	30.4	29.1	29.9	13.4	10.9	16.8	0
2866	39.53	50.4594	38.3099	13.2448	18.547	18.547	0	2.38328	1.19028	0							2869.15	39.1	37.5	45.2	30.4	29.1	29.9	13.4	10.9	16.8	0
2869.15	39.5345	50.4706	38.327	13.251	18.5251	18.5251	0	2.37237	1.25511	0							2872.3	39.1	37.5	45.2	30.5	29.1	29.9	13.4	11	16.8	0
2872.3	39.5431	50.4807	38.3469	13.2484	18.5202	18.5202	0	2.35776	1.30479	0							2875.45	39.1	37.5	45.2	30.5	29.1	29.9	13.3	11	16.8	0
2875.45	39.562	50.4938	38.3672	13.2449	18.5141	18.5141	0	2.33081	1.34267	0							2878.6	39.1	37.5	45.2	30.6	29.1	30	13.3	11	16.8	0
2878.6	39.5756	50.5071	38.389	13.2407	18.5025	18.5025	0	2.31106	1.36196	0							2881.75	39.1	37.5	45.2	30.6	29	30	13.3	11	16.8	0
2881.75	39.5864	50.515	38.4103	13.2306	18.4906	18.4906	0	2.29281	1.35565	0							2884.9	39.1	37.5	45.3	30.7	29	30	13.3	11	16.8	0
2884.9	39.5979	50.5207	38.4248	13.2147	18.4754	18.4754	0	2.26761	1.34162	0							2888.05	39.1	37.5	45.3	30.6	29	30	13.3	11	16.8	0
2888.05	39.6053	50.5268	38.4348	13.2049	18.4515	18.4515	0	2.2408	1.3334	0							2891.2	39.2	37.5	45.3	30.6	29	30	13.3	11	16.9	0
2891.2	39.6102	50.5319	38.4459	13.2007	18.4241	18.4241	0	2.21297	1.33144	0							2894.35	39.2	37.5	45.3	30.5	29.1	29.9	13.3	11	16.9	0
2894.35	39.6187	50.5352	38.4541	13.197	18.3995	18.3995	0	2.19634	1.34393	0							2897.5	39.2	37.5	45.3	30.5	29.1	29.9	13.3	11	16.8	0
2897.5	39.6275	50.5382	38.4637	13.1968	18.3724	18.3724	0	2.18621	1.36692	0							2900.65	39.2	37.6	45.3	30.5	29.1	29.9	13.3	11	16.8	0
2900.65	39.632	50.5449	38.4751	13.2046	18.3379	18.3379	0	2.18814	1.39007	0							2903.8	39.2	37.6	45.3	30.6	29.1	29.9	13.3	11	16.8	0
2903.8	39.627	50.5502	38.4868	13.2139	18.3107	18.3107	0	2.199	1.39615	0							2906.95	39.2	37.6	45.3	30.7	29.1	29.9	13.3	11	16.9	0
2906.95	39.6256	50.5558	38.4952	13.2205	18.2874	18.2874	0	2.20548	1.3881	0							2910.1	39.2	37.6	45.3	30.8	29.1	29.9	13.3	11	16.9	0
2910.1	39.6328	50.5647	38.5023	13.2317	18.2568	18.2568	0	2.21541	1.37705	0							2913.25	39.2	37.6	45.3	30.9	29.1	29.9	13.3	11	16.9	0
2913.25	39.642	50.5735	38.513	13.2394	18.2303	18.2303	0	2.23127	1.34417	0							2916.4	39.2	37.6	45.3	31	29.1	29.9	13.3	11	16.9	0
2916.4	39.649	50.5814	38.5192	13.2403	18.215	18.215	0	2.24289	1.30168	0							2919.55	39.2	37.6	45.3	31	29.1	29.9	13.3	11	16.9	0
2919.55	39.6628	50.5907	38.5221	13.2386	18.201	18.201	0	2.25328	1.25667	0							2922.7	39.3	37.6	45.3	30.8	29.1	29.9	13.2	11	16.9	0
2922.7	39.6773	50.6015	38.5299	13.2364	18.1894	18.1894	0	2.25377	1.21411	0							2925.85	39.3	37.6	45.3	30.6	29	29.9	13.2	11	16.9	0
2925.85	39.6898	50.6094	38.5405	13.2335	18.1748	18.1748	0	2.25363	1.18736	0							2929	39.3	37.6	45.3	30.5	29	29.9	13.2	10.9	16.9	0
2929	39.7041	50.6094	38.5506	13.2247	18.1677	18.1677	0	2.25931	1.15759	0							2932.15	39.3	37.7	45.3	30.4	29	29.9	13.2	10.9	16.9	0
2932.15	39.7175	50.6104	38.5622	13.2186	18.1598	18.1598	0	2.25066	1.13158	0							2935.3	39.3	37.7	45.3	30.4	29	29.9	13.2	10.8	16.9	0
2935.3	39.7266	50.6143	38.5813	13.2225	18.1721	18.1721	0	2.23882	1.1055	0							2938.45	39.3	37.7	45.3	30.3	29	29.9	13.2	10.7	16.9	0
2938.45	39.7289	50.6153	38.6027	13.2299	18.1794	18.1794	0	2.22718	1.07292	0							2941.6	39.3	37.7	45.3	30.3	29	29.9	13.2	10.6	16.9	0
2941.6	39.7327	50.6187	38.62	13.2383	18.1772	18.1772	0	2.21232	1.05054	0							2944.75	39.3	37.7	45.3	30.3	29	29.9	13.2	10.6	16.9	0
2944.75	39.7439	50.627	38.6339	13.2534	18.1776	18.1776	0	2.19409	1.03362	0							2947.9	39.3	37.7	45.3	30.3	29	29.9	13.2	10.5	16.9	0
2947.9	39.7544	50.6365	38.6465	13.2638	18.1794	18.1794	0	2.1759	1.00019	0							2951.05	39.3	37.7	45.3	30.3	29	29.9	13.2	10.5	16.9	0
2951.05	39.7589	50.6499	38.6573	13.2672	18.1862	18.1862	0	2.15831	0.93593	0							2954.2	39.3	37.7	45.3	30.4	29	29.9	13.2	10.5	16.9	0
2954.2	39.7645	50.6597	38.6682	13.2719	18.1807	18.1807	0	2.14498	0.87455	0							2957.35	39.4	37.6	45.3	30.5	29	29.9	13.2	10.5	16.8	0
2957.35	39.7696	50.6721	38.6793	13.2796	18.1592	18.1592	0	2.13176	0.81752	0							2960.5	39.4	37.7	45.3	30.6	29	29.9	13.2	10.5	16.8	0
2960.5	39.7741	50.6797	38.6868	13.2901	18.1232	18.1232	0	2.12065	0.77545	0							2963.65	39.4	37.7	45.3	30.7	29	29.9	13.2	10.6	16.8	0
2963.65	39.7811	50.682	38.6889	13.2943	18.0815	18.0815	0	2.1073	0.75377	0							2966.8	39.4	37.7	45.4	30.8	29	29.9	13.2	10.6	16.8	0
2966.8	39.7923	50.6873	38.6921	13.2995	18.0395	18.0395	0	2.08965	0.77241	0							2969.95	39.4	37.7	45.4	30.8	29	29.9	13.2	10.7	16.8	0
2969.95	39.8061	50.6905	38.7001	13.3048	17.997	17.997	0	2.06479	0.80184	0							2973.1	39.4	37.7	45.4	30.8	29	30	13.2	10.8	16.8	0
2973.1	39.8169	50.6931	38.7091	13.2983	17.962	17.962	0	2.02727	0.82018	0							2976.25	39.4	37.7	45.5	30.7	29	30	13.2	10.9	16.8	0
2976.25	39.8273	50.6971	38.7147	13.2846	17.9295	17.9295	0	1.99497	0.82405	0							2979.4	39.4	37.7	45.5	30.6	29.1	30	13.2	11	16.8	0
2979.4	39.8407	50.7024	38.7243	13.2792	17.8994	17.8994	0	1.9661	0.80522	0							2982.55	39.4	37.7	45.5	30.6	29.1	30.1	13.2	11.1	16.8	0
2982.55	39.8516	50.7087	38.7375	13.2747	17.8786	17.8786	0	1.95051	0.77319	0							2985.7	39.4	37.7	45.5	30.5	29.1	30.1	13.2	11.2	16.8	0
2985.7	39.8557	50.7159	38.7496	13.2712	17.8674	17.8674	0	1.94213	0.73681	0							2988.85	39.4	37.7	45.5	30.4	29.1	30.1	13.2	11.2	16.8	0
2988.85	39.8584	50.7266	38.7627	13.2724	17.8462	17.8462	0	1.92848	0.70877	0							2992	39.4	37.7	45.5	30.4	29.1	30.1	13.2	11.3	16.8	0
2992	39.8642	50.7408	38.7762	13.2845	17.8217	17.8217	0	1.90855	0.69754	0							2995.15	39.4	37.7	45.5	30.4	29.1	30.1	13.2	11.4	16.7	0
2995.15	39.8711	50.7498	38.7853	13.2909	17.8041	17.8041	0	1.8639	0.69295	0							2998.3	39.4	37.7	45.5	30.5	29.1	30.1	13.2	11.4	16.7	0
2998.3	39.8797	50.7571	38.7944	13.2916	17.7927	17.7927	0	1.81058	0.6963	0							3001.45	39.4	37.7	45.5	30.5	29.1	30.1	13.2	11.4	16.7	0
3001.45	39.8909	50.7628	38.8108	13.2957	17.7799	17.7799	0	1.7657	0.71696	0							3004.6	39.4	37.8	45.5	30.5	29.1	30.1	13.2	11.4	16.7	0
3004.6	39.907	50.7668	38.8251	13.2911	17.7638	17.7638	0	1.72015	0.74561	0							3007.75	39.5	37.8	45.5	30.5	29.1	30.1	13.2	11.4	16.7	0
3007.75	39.9188	50.7682	38.8324	13.2783	17.7457	17.7457	0	1.696	0.77546	0							3010.9	39.5	37.8	45.5	30.5	29.1	30.1	13.2	11.3	16.7	0
3010.9	39.925	50.7699	38.8422	13.2791	17.7269	17.7269	0	1.69652	0.82132	0							3014.05	39.5	37.8	45.5	30.5	29.1	30.1	13.2	11.3	16.7	0
3014.05	39.9335	50.7731	38.8573	13.2827	17.7045	17.7045	0	1.71446	0.87324	0							3017.2	39.5	37.8	45.5	30.5	29.1	30.1	13.2	11.3	16.8	0
3017.2	39.9424	50.7753	38.872	13.2874	17.6833	17.6833	0	1.73924	0.91966	0							3020.35	39.5	37.8	45.5	30.4	29.2	30.1	13.2	11.2	16.8	0
3020.35	39.9449	50.7857	38.8832	13.2888	17.6572	17.6572	0	1.73702	0.95966	0							3023.5	39.5	37.8	45.5	30.4	29.2	30.1	13.2	11.2	16.8	0
3023.5	39.9424	50.8024	38.8928	13.2953	17.619	17.619	0	1.73231	0.99735	0							3026.65	39.5	37.8	45.6	30.3	29.2	30.1	13.2	11.2	16.8	0
3026.65	39.9435	50.8144	38.9063	13.3081	17.5752	17.5752	0	1.73603	1.01519	0							3029.8	39.5	37.8	45.6	30.3	29.2	30.1	13.2	11.2	16.8	0
3029.8	39.9512	50.823	38.9188	13.3114	17.5343	17.5343	0	1.74514	1.01381	0							3032.95	39.5	37.8	45.6	30.4	29.2	30	13.2	11.2	16.8	0
3032.95	39.9634	50.8339	38.935	13.305	17.4958	17.4958	0	1.75345	1.0185	0							3036.1	39.5	37.8	45.6	30.4	29.3	30	13.2	11.2	16.8	0
3036.1	39.9804	50.848	38.9566	13.2993	17.461	17.461	0	1.77746	1.02406	0							3039.25	39.6	37.8	45.6	30.4	29.3	30	13.2	11.2	16.8	0
3039.25	40.0004	50.8592	38.9742	13.2852	17.4312	17.4312	0	1.80458	1.03133	0							3042.4	39.6	37.8	45.6	30.4	29.3	30	13.2	11.2	16.8	0
3042.4	40.0115	50.8661	38.9814	13.2695	17.406	17.406	0	1.82615	1.04096	0							3045.55	39.6	37.8	45.6	30.4	29.3	30	13.2	11.2	16.8	0
3045.55	40.0236	50.8692	38.9895	13.2598	17.3714	17.3714	0	1.84001	1.05863	0							3048.7	39.6	37.8	45.6	30.5	29.4	30	13.2	11.3	16.8	0
3048.7	40.0386	50.8744	38.9983	13.2557	17.3348	17.3348	0	1.86025	1.06809	0							3051.85	39.6	37.8	45.6	30.5	29.4	30	13.2	11.3	16.8	0
3051.85	40.0508	50.8764	39.0104	13.2563	17.2978	17.2978	0	1.87273	1.08969	0							3055	39.6	37.8	45.6	30.6	29.4	30	13.2	11.3	16.8	0
3055	40.0559	50.8813	39.0184	13.2551	17.2524	17.2524	0	1.8877	1.10978	0							3058.15	39.6	37.8	45.6	30.6	29.4	30	13.2	11.4	16.9	0
3058.15	40.0559	50.8873	39.0285	13.2613	17.203	17.203	0	1.91073	1.12082	0							3061.3	39.7	37.8	45.6	30.6	29.4	30	13.2	11.4	16.9	0
3061.3	40.0528	50.8889	39.0418	13.2724	17.1606	17.1606	0	1.9345	1.11297	0							3064.45	39.7	37.8	45.6	30.6	29.4	30	13.2	11.4	16.9	0
3064.45	40.0539	50.8883	39.052	13.2789	17.1347	17.1347	0	1.94825	1.10223	0							3067.6	39.7	37.8	45.6	30.6	29.4	30	13.2	11.4	16.9	0
3067.6	40.0591	50.8903	39.0635	13.2936	17.1196	17.1196	0	1.95428	1.10705	0							3070.75	39.7	37.9	45.6	30.5	29.5	30	13.2	11.3	16.9	0
3070.75	40.0659	50.8993	39.0728	13.31	17.1071	17.1071	0	1.96155	1.10949	0							3073.9	39.7	37.9	45.6	30.4	29.5	30	13.2	11.3	16.9	0
3073.9	40.0781	50.9108	39.0765	13.3194	17.0999	17.0999	0	1.96648	1.10723	0							3077.05	39.7	37.9	45.6	30.5	29.5	30	13.2	11.2	16.9	0
3077.05	40.0898	50.9192	39.0809	13.3294	17.0942	17.0942	0	1.96198	1.10011	0							3080.2	39.7	37.9	45.6	30.5	29.6	30	13.2	11.1	16.9	0
3080.2	40.0968	50.9287	39.0879	13.3415	17.079	17.079	0	1.95221	1.0838	0							3083.35	39.7	37.9	45.6	30.6	29.6	30	13.3	11	16.9	0
3083.35	40.1089	50.9357	39.0998	13.3487	17.0587	17.0587	0	1.94969	1.06304	0							3086.5	39.7	37.9	45.6	30.6	29.6	30.1	13.3	11	17	0
3086.5	40.1201	50.9432	39.1096	13.3487	17.0352	17.0352	0	1.9431	1.05135	0							3089.65	39.7	37.9	45.6	30.7	29.6	30.1	13.3	10.9	17	0
3089.65	40.1273	50.9522	39.1134	13.357	17.0023	17.0023	0	1.92816	1.03572	0							3092.8	39.7	37.9	45.7	30.7	29.6	30.1	13.3	10.9	17	0
3092.8	40.1337	50.9575	39.1229	13.3665	16.9674	16.9674	0	1.90796	1.01464	0							3095.95	39.7	37.9	45.7	30.7	29.6	30.1	13.3	10.9	17	0
3095.95	40.1434	50.9597	39.1338	13.369	16.9348	16.9348	0	1.88228	0.98757	0							3099.1	39.7	37.9	45.7	30.7	29.6	30.1	13.3	10.9	17	0
3099.1	40.1581	50.9609	39.1417	13.3725	16.9056	16.9056	0	1.85683	0.95666	0							3102.25	39.7	37.9	45.7	30.8	29.6	30.1	13.3	11	17	0
3102.25	40.1719	50.9647	39.1512	13.3815	16.8709	16.8709	0	1.83502	0.92911	0							3105.4	39.7	37.9	45.7	30.9	29.6	30.1	13.3	11	17	0
3105.4	40.185	50.9739	39.1586	13.3844	16.835	16.835	0	1.82458	0.89238	0							3108.55	39.7	37.9	45.7	31	29.6	30.1	13.3	10.9	17	0
3108.55	40.1986	50.9809	39.1674	13.3845	16.8168	16.8168	0	1.82376	0.85351	0							3111.7	39.7	37.9	45.7	31.1	29.5	30.1	13.2	10.9	17	0
3111.7	40.206	50.9904	39.1789	13.3873	16.7928	16.7928	0	1.82462	0.82867	0							3114.85	39.7	37.9	45.7	31.1	29.5	30.1	13.2	10.9	17	0
3114.85	40.2065	51.0024	39.1935	13.3984	16.7709	16.7709	0	1.83427	0.80204	0							3118	39.7	37.9	45.7	31	29.5	30.1	13.2	10.9	17	0
3118	40.2069	51.0145	39.2051	13.4098	16.7519	16.7519	0	1.84611	0.77668	0							3121.15	39.7	37.9	45.7	30.7	29.5	30.1	13.2	10.9	17	0
3121.15	40.207	51.0276	39.2082	13.4187	16.7306	16.7306	0	1.84305	0.77462	0							3124.3	39.7	37.9	45.7	30.5	29.5	30.1	13.2	10.9	17	0
3124.3	40.2071	51.037	39.2139	13.4364	16.696	16.696	0	1.83106	0.76937	0							3127.45	39.8	37.9	45.7	30.6	29.5	30.1	13.2	10.9	17	0
3127.45	40.2038	51.0445	39.228	13.4584	16.6598	16.6598	0	1.81261	0.76322	0							3130.6	39.8	37.9	45.7	30.7	29.5	30.1	13.2	11	17	0
3130.6	40.2017	51.0463	39.2438	13.47	16.624	16.624	0	1.79644	0.75703	0							3133.75	39.8	37.9	45.7	30.7	29.5	30.1	13.2	11	17	0
3133.75	40.2067	51.046	39.2538	13.4767	16.5879	16.5879	0	1.77697	0.75773	0							3136.9	39.8	38	45.7	30.7	29.5	30.1	13.2	11	17	0
3136.9	40.2155	51.0517	39.2592	13.4845	16.5356	16.5356	0	1.75789	0.7721	0							3140.05	39.8	38	45.7	30.7	29.5	30.1	13.2	11	17	0
3140.05	40.2246	51.053	39.2677	13.4803	16.4872	16.4872	0	1.75519	0.78147	0							3143.2	39.8	38	45.7	30.6	29.5	30.1	13.2	11	17.1	0
3143.2	40.2308	51.0526	39.2769	13.4798	16.4456	16.4456	0	1.75893	0.80155	0							3146.35	39.8	38	45.7	30.5	29.5	30.1	13.2	11.1	17.1	0
3146.35	40.2366	51.0573	39.2945	13.4787	16.3991	16.3991	0	1.76559	0.79591	0							3149.5	39.8	38	45.7	30.4	29.6	30.1	13.2	11	17.1	0
3149.5	40.2444	51.0659	39.3101	13.4795	16.3555	16.3555	0	1.777	0.793	0							3152.65	39.8	38	45.7	30.3	29.6	30.1	13.2	11	17.1	0
3152.65	40.2552	51.0731	39.3187	13.4773	16.3275	16.3275	0	1.78977	0.79226	0							3155.8	39.8	38	45.7	30.3	29.6	30.1	13.2	11	17.1	0
3155.8	40.2706	51.0844	39.326	13.4742	16.2999	16.2999	0	1.78758	0.80625	0							3158.95	39.9	38	45.8	30.2	29.6	30.1	13.1	10.9	17.1	0
3158.95	40.2872	51.0935	39.3377	13.4798	16.274	16.274	0	1.77361	0.83514	0							3162.1	39.9	38	45.8	30.2	29.7	30.1	13.1	10.9	17.1	0
3162.1	40.2946	51.1024	39.3494	13.4828	16.2453	16.2453	0	1.74148	0.87093	0							3165.25	39.9	38	45.8	30.2	29.7	30.1	13.1	10.9	17.1	0
3165.25	40.3024	51.1057	39.3585	13.4815	16.2152	16.2152	0	1.71326	0.90679	0							3168.4	39.9	38	45.8	30.2	29.7	30	13.1	10.9	17.1	0
3168.4	40.3145	51.1106	39.3676	13.4842	16.17	16.17	0	1.67631	0.9368	0							3171.55	39.9	38	45.8	30.3	29.7	30	13.1	10.9	17.1	0
3171.55	40.3277	51.115	39.3805	13.4917	16.1101	16.1101	0	1.64465	0.95554	0							3174.7	39.9	38	45.8	30.3	29.7	30	13.1	11	17.1	0
3174.7	40.3352	51.1136	39.3953	13.4983	16.0613	16.0613	0	1.62796	0.96321	0							3177.85	39.9	38	45.8	30.3	29.8	30	13.1	10.9	17.1	0
3177.85	40.3363	51.1126	39.4108	13.4997	16.0175	16.0175	0	1.61277	0.96482	0							3181	39.9	38.1	45.8	30.2	29.8	30	13.1	10.9	17.1	0
3181	40.3336	51.1171	39.4282	13.5036	15.9751	15.9751	0	1.61188	0.96112	0							3184.15	39.9	38.1	45.8	30.3	29.8	30.1	13.1	10.9	17.1	0
3184.15	40.336	51.1249	39.444	13.5086	15.9451	15.9451	0	1.62668	0.94889	0							3187.3	39.9	38.1	45.8	30.5	29.8	30.1	13.1	10.9	17.1	0
3187.3	40.3383	51.1337	39.4509	13.5028	15.9293	15.9293	0	1.63609	0.92916	0							3190.45	39.9	38.1	45.8	30.7	29.8	30.1	13.1	10.9	17.1	0
3190.45	40.3439	51.1448	39.4525	13.4897	15.9223	15.9223	0	1.63817	0.90555	0							3193.6	39.9	38.1	45.8	30.8	29.8	30.1	13.1	10.9	17.1	0
3193.6	40.3565	51.1564	39.454	13.4787	15.9185	15.9185	0	1.62878	0.88144	0							3196.75	39.9	38.1	45.8	30.9	29.8	30.1	13.1	11	17.1	0
3196.75	40.3664	51.1646	39.4553	13.4648	15.9179	15.9179	0	1.62044	0.85399	0							3199.9	39.9	38.1	45.8	31	29.8	30.1	13.1	11	17.1	0
3199.9	40.3795	51.1703	39.4543	13.4515	15.9154	15.9154	0	1.60661	0.83239	0							3203.05	40	38.1	45.8	30.7	29.8	30.1	13.1	10.9	17.1	0
3203.05	40.3993	51.1771	39.4563	13.4438	15.9039	15.9039	0	1.58532	0.82343	0							3206.2	40	38.1	45.8	30.4	29.9	30.1	13.1	10.9	17.1	0
3206.2	40.4194	51.1789	39.4687	13.4469	15.8884	15.8884	0	1.55355	0.82294	0							3209.35	40	38.1	45.8	30.2	29.9	30.1	13	10.9	17.1	0
3209.35	40.437	51.1764	39.4823	13.451	15.8698	15.8698	0	1.51405	0.83931	0							3212.5	40	38.1	45.9	30.1	29.9	30.1	13	10.9	17.1	0
3212.5	40.4487	51.1754	39.4949	13.4587	15.8332	15.8332	0	1.47391	0.86742	0							3215.65	40	38.1	45.9	30.1	29.9	30.1	13	10.9	17.1	0
3215.65	40.46	51.1775	39.5085	13.4719	15.7794	15.7794	0	1.44388	0.8906	0							3218.8	40	38.1	45.9	30.1	29.9	30.1	13	10.9	17.1	0
3218.8	40.4703	51.1863	39.5193	13.4785	15.7093	15.7093	0	1.4289	0.90892	0							3221.95	40	38.1	45.9	30.1	29.9	30.1	13	10.9	17.1	0
3221.95	40.4782	51.1875	39.5321	13.4765	15.6335	15.6335	0	1.41497	0.92503	0							3225.1	40	38.1	45.9	30	30	30.1	13	10.9	17.1	0
3225.1	40.4847	51.1974	39.5476	13.4784	15.5498	15.5498	0	1.402	0.92753	0							3228.25	40	38.2	45.9	30	30	30.1	13	10.8	17	0
3228.25	40.4933	51.2106	39.562	13.482	15.4721	15.4721	0	1.38285	0.91197	0							3231.4	40	38.2	45.9	30	30	30.1	13	10.8	17	0
3231.4	40.501	51.2197	39.5741	13.4806	15.4053	15.4053	0	1.36998	0.86405	0							3234.55	40	38.2	45.9	29.9	30	30.1	13	10.8	17	0
3234.55	40.5081	51.2293	39.5737	13.4765	15.3353	15.3353	0	1.35144	0.80899	0							3237.7	40	38.2	45.9	29.8	30	30.1	13	10.8	16.9	0
3237.7	40.5173	51.2367	39.5783	13.4811	15.2676	15.2676	0	1.3557	0.75004	0							3240.85	40	38.2	45.9	29.7	30	30.1	13	10.8	16.9	0
3240.85	40.5278	51.233	39.5868	13.4872	15.2081	15.2081	0	1.35607	0.68652	0							3244	40	38.2	45.9	29.7	30	30.1	13	10.8	16.9	0
3244	40.5355	51.2249	39.592	13.4903	15.1536	15.1536	0	1.35821	0.62344	0							3247.15	40.1	38.2	45.9	29.7	30	30.1	13	10.8	16.9	0
3247.15	40.5402	51.2217	39.5963	13.4998	15.1022	15.1022	0	1.37596	0.5705	0							3250.3	40.1	38.2	45.9	29.8	30	30.1	13	10.8	16.9	0
3250.3	40.5461	51.2259	39.6072	13.5139	15.0481	15.0481	0	1.40209	0.52317	0							3253.45	40.1	38.2	45.9	29.9	30	30.1	13	10.9	16.9	0
3253.45	40.5552	51.2254	39.6176	13.5188	15.0054	15.0054	0	1.42495	0.47967	0							3256.6	40.1	38.2	45.9	30	30	30.2	13	11.1	16.9	0
3256.6	40.5645	51.2261	39.6253	13.5267	14.9685	14.9685	0	1.43852	0.44144	0							3259.75	40.1	38.3	45.9	30.2	30	30.2	13	11.2	16.8	0
3259.75	40.5729	51.2379	39.6317	13.5395	14.9282	14.9282	0	1.43926	0.41771	0							3262.9	40.1	38.3	45.9	30.3	30	30.2	13	11.3	16.8	0
3262.9	40.5831	51.2475	39.6323	13.5517	14.8992	14.8992	0	1.43391	0.40068	0							3266.05	40.1	38.3	45.9	30.3	30	30.2	13	11.5	16.8	0
3266.05	40.5883	51.2599	39.6324	13.56	14.8949	14.8949	0	1.42384	0.39395	0							3269.2	40.1	38.3	45.9	30.2	30	30.2	13	11.6	16.8	0
3269.2	40.5858	51.2709	39.6337	13.5691	14.9057	14.9057	0	1.40875	0.40006	0							3272.35	40.1	38.3	45.9	30.1	30	30.1	13	11.6	16.7	0
3272.35	40.5861	51.2757	39.6443	13.5809	14.9563	14.9563	0	1.40523	0.4109	0							3275.5	40.1	38.3	46	30	30.1	30.1	13	11.6	16.7	0
3275.5	40.5896	51.2793	39.6593	13.5877	15.0258	15.0258	0	1.41108	0.41917	0							3278.65	40.1	38.3	46	29.9	30.1	30.1	13	11.5	16.7	0
3278.65	40.5944	51.283	39.6706	13.5849	15.0878	15.0878	0	1.42015	0.42538	0							3281.8	40.1	38.3	46	29.8	30.1	30.1	13	11.5	16.7	0
3281.8	40.5958	51.2893	39.6838	13.578	15.1444	15.1444	0	1.42728	0.42385	0							3284.95	40.1	38.3	46	29.8	30	30.1	13	11.5	16.6	0
3284.95	40.5995	51.2956	39.7004	13.5708	15.192	15.192	0	1.4409	0.41504	0							3288.1	40.1	38.4	46	29.8	30	30.1	13.1	11.4	16.6	0
3288.1	40.6098	51.2973	39.7165	13.5625	15.2357	15.2357	0	1.45686	0.40904	0							3291.25	40.2	38.4	46	29.8	30	30.1	13.1	11.4	16.6	0
3291.25	40.6192	51.3006	39.7286	13.5564	15.2703	15.2703	0	1.46118	0.40954	0							3294.4	40.2	38.4	46	29.7	30	30.1	13.1	11.4	16.6	0
3294.4	40.6281	51.3029	39.7387	13.5612	15.3012	15.3012	0	1.45593	0.40359	0							3297.55	40.2	38.4	46	29.7	30	30.1	13.1	11.3	16.6	0
3297.55	40.6394	51.3057	39.75	13.5703	15.3406	15.3406	0	1.44353	0.39443	0							3300.7	40.2	38.4	46	29.7	30.1	30.1	13.1	11.3	16.6	0
3300.7	40.6487	51.3124	39.7616	13.5795	15.3579	15.3579	0	1.38604	0.39336	0							3303.85	40.2	38.4	46	29.7	30.1	30.1	13.1	11.4	16.6	0
3303.85	40.6582	51.3146	39.7786	13.5931	15.3271	15.3271	0	1.30795	0.41837	0							3307	40.2	38.4	46	29.8	30.1	30.1	13.1	11.4	16.6	0
3307	40.6679	51.3179	39.7985	13.6086	15.2479	15.2479	0	1.23799	0.43856	0							3310.15	40.2	38.4	46	30	30.1	30.1	13.1	11.3	16.6	0
3310.15	40.6783	51.3229	39.816	13.6127	15.1362	15.1362	0	1.17833	0.45694	0							3313.3	40.2	38.4	46	30.2	30.1	30.1	13	11.3	16.6	0
3313.3	40.6855	51.3272	39.8291	13.6171	15.0011	15.0011	0	1.12684	0.478	0							3316.45	40.2	38.4	46	30.5	30.2	30.1	13	11.3	16.6	0
3316.45	40.6838	51.3326	39.8383	13.6223	14.8637	14.8637	0	1.10714	0.47504	0							3319.6	40.2	38.4	46	30.7	30.2	30.1	13	11.3	16.6	0
3319.6	40.6858	51.3355	39.8473	13.6324	14.7375	14.7375	0	1.13734	0.4579	0							3322.75	40.2	38.4	46	30.9	30.2	30.1	13	11.3	16.5	0
3322.75	40.6917	51.3345	39.8511	13.64	14.6234	14.6234	0	1.15942	0.41407	0							3325.9	40.2	38.5	46	30.9	30.2	30.1	13	11.3	16.5	0
3325.9	40.6944	51.3354	39.8479	13.6521	14.4928	14.4928	0	1.17225	0.37218	0							3329.05	40.2	38.5	46	30.8	30.2	30.1	13	11.3	16.5	0
3329.05	40.6917	51.335	39.8537	13.6671	14.3631	14.3631	0	1.18003	0.34856	0							3332.2	40.2	38.5	46	30.6	30.2	30.1	13	11.3	16.5	0
3332.2	40.6876	51.3362	39.8594	13.6728	14.2408	14.2408	0	1.16094	0.35538	0							3335.35	40.2	38.5	46	30.4	30.2	30.1	13	11.3	16.5	0
3335.35	40.6841	51.3393	39.8618	13.6714	14.1191	14.1191	0	1.15123	0.39689	0							3338.5	40.2	38.5	46	30.3	30.2	30.1	13	11.3	16.5	0
3338.5	40.6821	51.3392	39.8675	13.6745	14.0108	14.0108	0	1.15368	0.44544	0							3341.65	40.3	38.5	46	30.1	30.2	30.1	13	11.3	16.4	0
3341.65	40.6811	51.3405	39.8709	13.6761	13.9213	13.9213	0	1.17145	0.49319	0							3344.8	40.3	38.5	46	30	30.2	30.2	13	11.3	16.4	0
3344.8	40.6839	51.3416	39.8712	13.6758	13.8608	13.8608	0	1.1914	0.51443	0							3347.95	40.3	38.5	46	29.8	30.2	30.2	13	11.3	16.4	0
3347.95	40.6911	51.3457	39.8722	13.6806	13.8203	13.8203	0	1.20791	0.46833	0							3351.1	40.3	38.5	46.1	29.7	30.2	30.2	13	11.3	16.4	0
3351.1	40.6949	51.35	39.8772	13.6921	13.7981	13.7981	0	1.22016	0.36857	0							3354.25	40.3	38.5	46.1	29.7	30.2	30.2	12.9	11.3	16.4	0
3354.25	40.6996	51.3478	39.8805	13.6981	13.795	13.795	0	1.22558	0.26619	0							3357.4	40.3	38.5	46.1	29.7	30.2	30.2	12.9	11.4	16.4	0
3357.4	40.7088	51.3469	39.8821	13.7024	13.8082	13.8082	0	1.21304	0.1614	0							3360.55	40.3	38.5	46.1	29.7	30.2	30.2	12.9	11.4	16.4	0
3360.55	40.7157	51.3487	39.8859	13.7082	13.8216	13.8216	0	1.18546	0.07728	0							3363.7	40.3	38.5	46.1	29.7	30.2	30.2	12.9	11.4	16.3	0
3363.7	40.7191	51.3495	39.8967	13.7118	13.8325	13.8325	0	1.14779	0.02591	0							3366.85	40.3	38.5	46.1	29.6	30.2	30.3	12.9	11.4	16.3	0
3366.85	40.7216	51.3526	39.9047	13.7093	13.8392	13.8392	0	1.11177	0.00475	0							3370	40.3	38.5	46.1	29.6	30.2	30.3	12.8	11.4	16.3	0
3370	40.7249	51.3554	39.911	13.7078	13.8361	13.8361	0	1.08169	0	0							3373.15	40.3	38.5	46.1	29.6	30.2	30.3	12.8	11.4	16.3	0
3373.15	40.7302	51.36	39.9227	13.705	13.8303	13.8303	0	1.06211	0	0							3376.3	40.4	38.5	46.1	29.5	30.2	30.3	12.8	11.4	16.3	0
3376.3	40.7335	51.3675	39.9341	13.698	13.8262	13.8262	0	1.04792	0	0							3379.45	40.4	38.6	46.1	29.5	30.2	30.3	12.8	11.5	16.2	0
3379.45	40.7426	51.3807	39.9425	13.6866	13.8167	13.8167	0	1.04	0	0							3382.6	40.4	38.6	46.1	29.6	30.2	30.4	12.8	11.5	16.2	0
3382.6	40.7535	51.3978	39.951	13.6735	13.7959	13.7959	0	1.04195	0	0							3385.75	40.4	38.6	46.1	29.6	30.2	30.4	12.8	11.5	16.2	0
3385.75	40.7595	51.407	39.9597	13.6577	13.7741	13.7741	0	1.05196	0	0							3388.9	40.4	38.6	46.1	29.6	30.3	30.4	12.8	11.6	16.2	0
3388.9	40.7664	51.4106	39.9636	13.6377	13.7557	13.7557	0	1.05658	0	0							3392.05	40.4	38.6	46.1	29.6	30.3	30.4	12.8	11.6	16.2	0
3392.05	40.7784	51.4154	39.9636	13.6196	13.7363	13.7363	0	1.05208	0	0							3395.2	40.4	38.6	46.1	29.6	30.3	30.3	12.8	11.6	16.2	0
3395.2	40.7893	51.422	39.9672	13.6095	13.7073	13.7073	0	1.04138	0	0							3398.35	40.4	38.6	46.1	29.6	30.3	30.3	12.8	11.6	16.2	0
3398.35	40.7971	51.4271	39.9777	13.6052	13.671	13.671	0	1.02365	0	0							3401.5	40.4	38.6	46.1	29.6	30.3	30.3	12.8	11.6	16.2	0
3401.5	40.8027	51.4248	39.9866	13.6026	13.6324	13.6324	0	0.9932	0	0							3404.65	40.4	38.6	46.1	29.6	30.3	30.3	12.8	11.7	16.2	0
3404.65	40.8076	51.4246	39.9933	13.607	13.5959	13.5959	0	0.95612	0	0							3407.8	40.4	38.6	46.1	29.6	30.3	30.3	12.8	11.7	16.2	0
3407.8	40.8151	51.4262	40.0032	13.6171	13.5649	13.5649	0	0.93008	0	0							3410.95	40.4	38.6	46.1	29.7	30.3	30.4	12.8	11.7	16.2	0
3410.95	40.8224	51.4247	40.0133	13.6278	13.5457	13.5457	0	0.90435	0	0							3414.1	40.4	38.6	46.2	29.8	30.3	30.4	12.8	11.7	16.2	0
3414.1	40.8313	51.4324	40.0153	13.6373	13.5279	13.5279	0	0.8825	0	0							3417.25	40.5	38.6	46.2	29.9	30.3	30.4	12.8	11.7	16.1	0
3417.25	40.8431	51.4388	40.0221	13.6479	13.5089	13.5089	0	0.8759	0	0							3420.4	40.5	38.6	46.2	30	30.3	30.3	12.8	11.7	16.1	0
3420.4	40.8513	51.4398	40.0331	13.6542	13.4976	13.4976	0	0.88347	0	0							3423.55	40.5	38.6	46.2	30.1	30.3	30.3	12.7	11.7	16.1	0
3423.55	40.8589	51.4492	40.0286	13.6465	13.4965	13.4965	0	0.90204	0	0							3426.7	40.5	38.6	46.2	30.2	30.3	30.3	12.7	11.7	16.1	0
3426.7	40.8671	51.4564	40.0253	13.6412	13.489	13.489	0	0.9138	0	0							3429.85	40.5	38.6	46.2	30.3	30.2	30.3	12.7	11.7	16	0
3429.85	40.8776	51.4636	40.027	13.6372	13.4787	13.4787	0	0.93127	0	0							3433	40.5	38.6	46.2	30.4	30.2	30.3	12.7	11.7	16	0
3433	40.884	51.4707	40.0199	13.6343	13.4666	13.4666	0	0.94467	0	0							3436.15	40.5	38.6	46.2	30.4	30.2	30.3	12.7	11.7	15.9	0
3436.15	40.8822	51.4663	40.0073	13.629	13.4555	13.4555	0	0.94359	0	0							3439.3	40.5	38.6	46.2	30.5	30.2	30.3	12.7	11.7	15.9	0
3439.3	40.8815	51.4673	39.9921	13.6313	13.445	13.445	0	0.93112	0	0							3442.45	40.5	38.7	46.2	30.5	30.2	30.3	12.7	11.7	15.8	0
3442.45	40.8852	51.4684	39.9817	13.6432	13.4357	13.4357	0	0.91327	0	0							3445.6	40.5	38.7	46.2	30.4	30.2	30.3	12.7	11.7	15.8	0
3445.6	40.8887	51.4639	39.9766	13.6542	13.4381	13.4381	0	0.87308	0	0							3448.75	40.5	38.7	46.2	30.3	30.2	30.3	12.7	11.7	15.8	0
3448.75	40.8948	51.4637	39.9757	13.6653	13.4338	13.4338	0	0.84082	0	0							3451.9	40.5	38.7	46.2	30.2	30.3	30.3	12.7	11.7	15.8	0
3451.9	40.9027	51.4616	39.985	13.6753	13.4244	13.4244	0	0.82111	0	0							3455.05	40.5	38.7	46.2	30.1	30.3	30.3	12.7	11.7	15.8	0
3455.05	40.9065	51.4585	39.9932	13.6788	13.4162	13.4162	0	0.80167	0	0							3458.2	40.5	38.6	46.2	30	30.3	30.3	12.7	11.7	15.7	0
3458.2	40.9151	51.4601	40.0029	13.682	13.4055	13.4055	0	0.77806	0	0							3461.35	40.5	38.6	46.2	29.9	30.3	30.4	12.7	11.7	15.7	0
3461.35	40.9254	51.4656	40.0187	13.6906	13.3868	13.3868	0	0.75393	0	0							3464.5	40.5	38.6	46.2	29.8	30.3	30.4	12.7	11.7	15.7	0
3464.5	40.9358	51.4759	40.035	13.7001	13.3618	13.3618	0	0.73721	0	0							3467.65	40.6	38.6	46.2	29.8	30.3	30.4	12.7	11.7	15.6	0
3467.65	40.9444	51.4816	40.0464	13.7042	13.3413	13.3413	0	0.72669	0	0							3470.8	40.6	38.6	46.2	29.9	30.3	30.4	12.7	11.7	15.6	0
3470.8	40.9457	51.4909	40.0501	13.7005	13.328	13.328	0	0.72064	0	0							3473.95	40.6	38.6	46.2	30	30.3	30.4	12.7	11.7	15.6	0
3473.95	40.9464	51.5022	40.0498	13.6959	13.3145	13.3145	0	0.71964	0	0							3477.1	40.6	38.6	46.2	30.1	30.3	30.4	12.7	11.7	15.5	0
3477.1	40.9513	51.5063	40.0503	13.692	13.3043	13.3043	0	0.72297	0	0							3480.25	40.6	38.6	46.3	30.2	30.3	30.3	12.7	11.7	15.5	0
3480.25	40.9543	51.5081	40.0497	13.6841	13.2973	13.2973	0	0.72977	0	0							3483.4	40.6	38.6	46.3	30.2	30.3	30.3	12.7	11.7	15.5	0
3483.4	40.9556	51.5099	40.05	13.6787	13.2818	13.2818	0	0.74734	0	0							3486.55	40.6	38.7	46.3	30.3	30.4	30.3	12.7	11.7	15.5	0
3486.55	40.9586	51.5188	40.0544	13.6763	13.2627	13.2627	0	0.76737	0	0							3489.7	40.6	38.7	46.3	30.3	30.4	30.3	12.7	11.6	15.4	0
3489.7	40.9626	51.5249	40.0616	13.6717	13.2463	13.2463	0	0.78558	0	0							3492.85	40.6	38.7	46.3	30.3	30.4	30.3	12.7	11.6	15.4	0
3492.85	40.9669	51.5307	40.0707	13.6745	13.2356	13.2356	0	0.7948	0	0							3496	40.7	38.7	46.3	30.3	30.4	30.3	12.6	11.6	15.4	0
3496	40.9715	51.542	40.08	13.6831	13.2252	13.2252	0	0.79327	0	0							3499.15	40.7	38.7	46.3	30.3	30.4	30.3	12.6	11.6	15.3	0
3499.15	40.9805	51.542	40.09	13.6869	13.2196	13.2196	0	0.7934	0	0							3502.3	40.7	38.7	46.3	30.3	30.4	30.3	12.6	11.6	15.3	0
3502.3	40.9883	51.541	40.0921	13.6852	13.2259	13.2259	0	0.78904	0	0							3505.45	40.7	38.7	46.3	30.2	30.4	30.2	12.6	11.6	15.3	0
3505.45	40.9882	51.5458	40.0905	13.6873	13.2357	13.2357	0	0.77111	0	0							3508.6	40.7	38.7	46.3	30.1	30.4	30.3	12.6	11.6	15.3	0
3508.6	40.9912	51.544	40.0946	13.6939	13.2309	13.2309	0	0.75577	0	0							3511.75	40.7	38.7	46.3	30.1	30.4	30.3	12.6	11.6	15.2	0
3511.75	41.0009	51.5415	40.0952	13.6983	13.2252	13.2252	0	0.74079	0	0							3514.9	40.7	38.7	46.3	30	30.3	30.3	12.6	11.6	15.2	0
3514.9	41.0108	51.5385	40.0956	13.694	13.2199	13.2199	0	0.72585	0	0							3518.05	40.7	38.7	46.3	30.3	30.3	30.3	12.6	11.6	15.2	0
3518.05	41.0178	51.5386	40.1002	13.6918	13.1976	13.1976	0	0.71303	0	0							3521.2	40.7	38.7	46.3	30.7	30.3	30.4	12.6	11.6	15.1	0
3521.2	41.0228	51.5459	40.1034	13.6912	13.1739	13.1739	0	0.71573	0	0							3524.35	40.7	38.7	46.3	30.9	30.3	30.4	12.6	11.6	15.1	0
3524.35	41.0262	51.55	40.1023	13.6794	13.1583	13.1583	0	0.69889	0	0							3527.5	40.7	38.7	46.3	31.2	30.3	30.4	12.6	11.6	15.1	0
3527.5	41.0326	51.5583	40.099	13.6713	13.1325	13.1325	0	0.68151	0	0							3530.65	40.7	38.7	46.3	31.3	30.3	30.4	12.6	11.6	15	0
3530.65	41.0382	51.5692	40.0948	13.6684	13.1116	13.1116	0	0.6897	0	0							3533.8	40.7	38.7	46.3	31.2	30.3	30.4	12.6	11.6	15	0
3533.8	41.0476	51.572	40.0977	13.6644	13.0991	13.0991	0	0.68562	0	0							3536.95	40.7	38.7	46.3	30.9	30.3	30.4	12.6	11.6	14.9	0
3536.95	41.0571	51.576	40.0963	13.6561	13.0879	13.0879	0	0.67343	0	0							3540.1	40.7	38.7	46.3	30.6	30.4	30.4	12.6	11.6	14.9	0
3540.1	41.0587	51.5781	40.098	13.6564	13.0696	13.0696	0	0.63952	0	0							3543.25	40.7	38.8	46.3	30.5	30.4	30.5	12.6	11.6	14.8	0
3543.25	41.0614	51.5784	40.1031	13.6565	13.0502	13.0502	0	0.60768	0	0							3546.4	40.7	38.8	46.3	30.4	30.4	30.5	12.6	11.6	14.7	0
3546.4	41.0658	51.5782	40.1027	13.6537	13.0359	13.0359	0	0.56988	0	0							3549.55	40.7	38.8	46.3	30.4	30.4	30.5	12.6	11.5	14.6	0
3549.55	41.0685	51.5769	40.0988	13.6511	13.0207	13.0207	0	0.52748	0	0							3552.7	40.7	38.8	46.3	30.5	30.4	30.5	12.6	11.5	14.6	0
3552.7	41.0694	51.5826	40.0983	13.6533	12.9977	12.9977	0	0.48951	0	0							3555.85	40.7	38.8	46.3	30.6	30.4	30.5	12.6	11.5	14.5	0
3555.85	41.0669	51.5912	40.1016	13.6593	12.9765	12.9765	0	0.45721	0	0							3559	40.7	38.8	46.4	30.7	30.4	30.5	12.6	11.5	14.5	0
3559	41.0686	51.5916	40.1073	13.6629	12.9573	12.9573	0	0.42998	0	0							3562.15	40.7	38.8	46.4	30.7	30.4	30.5	12.5	11.5	14.4	0
3562.15	41.068	51.5934	40.1097	13.6744	12.9403	12.9403	0	0.41478	0	0							3565.3	40.7	38.8	46.4	30.7	30.4	30.4	12.5	11.5	14.3	0
3565.3	41.0685	51.5974	40.1206	13.6933	12.9279	12.9279	0	0.41458	0	0							3568.45	40.7	38.8	46.4	30.7	30.4	30.4	12.5	11.5	14.3	0
3568.45	41.0756	51.6026	40.1303	13.7053	12.9232	12.9232	0	0.41315	0	0							3571.6	40.7	38.8	46.4	30.6	30.4	30.4	12.5	11.4	14.2	0
3571.6	41.0863	51.6104	40.1336	13.7185	12.9162	12.9162	0	0.40812	0	0							3574.75	40.7	38.8	46.4	30.8	30.4	30.3	12.6	11.5	14.2	0
3574.75	41.0947	51.6185	40.1354	13.7377	12.8968	12.8968	0	0.40504	0	0							3577.9	40.8	38.8	46.4	31	30.4	30.3	12.6	11.5	14.1	0
3577.9	41.1058	51.6287	40.1313	13.7537	12.8675	12.8675	0	0.40037	0	0							3581.05	40.8	38.8	46.4	31.2	30.4	30.3	12.6	11.5	14.1	0
3581.05	41.1153	51.6394	40.121	13.7633	12.8214	12.8214	0	0.39196	0	0							3584.2	40.8	38.8	46.4	31.4	30.4	30.3	12.5	11.5	14	0
3584.2	41.1239	51.6576	40.1093	13.7675	12.7582	12.7582	0	0.38276	0	0							3587.35	40.8	38.8	46.4	31.6	30.4	30.3	12.5	11.5	14	0
3587.35	41.1282	51.6815	40.1064	13.7717	12.691	12.691	0	0.37373	0	0							3590.5	40.8	38.8	46.4	31.6	30.4	30.3	12.5	11.5	13.9	0
3590.5	41.1281	51.6897	40.1041	13.7613	12.6283	12.6283	0	0.36021	0	0							3593.65	40.8	38.9	46.4	31.6	30.4	30.3	12.5	11.5	13.9	0
3593.65	41.1288	51.6958	40.0963	13.7494	12.5807	12.5807	0	0.34797	0	0							3596.8		38.9	46.4		30.4	30.4		11.5	13.9	0
3596.8	41.1306	51.7064	40.0912	13.7444	12.5485	12.5485	0	0.3446	0	0							3599.95		38.9	46.4		30.4	30.4		11.6	13.8	0
3599.95	41.1344	51.7153	40.0923	13.7405	12.5442	12.5442	0	0.34446	0	0							3603.1		38.9	46.4		30.4	30.4		11.6	13.8	0
3603.1	41.1411	51.7282	40.0944	13.7325	12.5437	12.5437	0	0.34152	0	0							3606.25		38.9	46.4		30.4	30.4		11.6	13.8	0
3606.25	41.1478	51.7457	40.0998	13.733	12.5407	12.5407	0	0.32952	0	0							3609.4		38.9	46.4		30.4	30.4		11.6	13.8	0
3609.4	41.1537	51.7594	40.1091	13.7514	12.5325	12.5325	0	0.30352	0	0
