# Supplementary material for: Fibrinogen αC-subregions critically contribute blood clot fibre growth, mechanical stability, and resistance to fibrinolysis
Source: eLife journal article supplement (doi:10.7554/elife.68761), 2021-10-11
Supplement: supp [file elife_poa_e68761_Figure_5_figure_supplement_1_source_data_1.xlsx]

## Sheet: Experiment 1
Experiment 1
		All Events	Platelet postive Events	All Events Events/μL(V)	Platelet postive events/μL(V)
Pre-activation	WT	651059	54202	26034.3	2167.41
	A390	815345	79290	32607.5	3170.98
	A220	833696	78420	33344.7	3136.51
	TF+	811486	74098	32455.8	2963.59
	TF-	543734	49247	21742.7	1969.28
Pre-post	WT	64329	93	2572.81	3.72
	A390	63296	236	2531.66	9.44
	A220	429228	8602	17163.8	343.97
	TF+	407232	30264	16284.4	1210.2
	TF-	475361	44770	19008.6	1790.25
Experiment 2
		All Events	Platelet postive Events	All Events Events/μL(V)	Platelet postive events/μL(V)
Pre-activation	WT	791427	51480	31650.8	2058.79
	A390	591749	37731	23667.7	1509.1
	A220	552532	36354	22099.1	1454.02
	TF+	594239	36611	23767.3	1464.3
	TF-	643789	41921	25743.6	1676.32
Pre-post	WT	143239	887	5726.91	35.46
	A390	220032	1770	8800.95	70.8
	A220	422580	7682	16898.1	307.19
	TF+	771577	20988	30853.9	839.27
	TF-	406049	30419	16233.7	1216.14
Experiment 3
		All Events	Platelet postive Events	All Events Events/μL(V)	Platelet postive events/μL(V)
Pre-activation	WT	513021	36983	20515	1478.9
	A390	600442	47050	24015.9	1881.86
	A220	740054	54060	29599.3	2162.19
	TF+	552769	51031	22103.9	2040.61
	TF-	541753	43215	21663.5	1728.07
Pre-post	WT	161347	312	6451.33	12.48
	A390	119366	159	4773.61	6.36
	A220	574107	13535	22957.3	541.24
	TF+	554799	37921	22185.1	1516.37
	TF-	571184	50350	22842.8	2013.6
