# Supplementary material for: Fibrinogen αC-subregions critically contribute blood clot fibre growth, mechanical stability, and resistance to fibrinolysis
Source: eLife journal article supplement (doi:10.7554/elife.68761), 2021-10-11
Supplement: supp [file elife_poa_e68761_Figure_5_figure_supplement_2_source_data_1.xlsx]

## Sheet: Fig 5 supplementary 2 source 1
Figure 5 supplementary 2 A
		WT			a390			a220			G'
	Experiment	1	2	3	1	2	3	1	2	3	1	2	3
% positive	basal	85.66	58.44	55.73	87.21	57.21	56.3	84.47	53.96	57.51	79.43	56	54.05
	ADP 10	99.82	96.15	97.13	99.86	95.83	97.42	99.58	93.97	95.15	81.26	51.08	60.27
	PAR4 200	99.77	99.96	99.93	99.75	99.94	99.86	99.62	99.94	99.74	80.67	51.57	58.95
Figure 5 supplementary 2 B
Median FI		WT			a390			a220			G'
	Experiment	1	2	3	1	2	3	1	2	3	1	2	3
	basal	6383.3	1931.5	1754.4	6910.9	2090.3	1960.7	6127.3	1821.7	1698	5141.6	1613.8	1968.3
	ADP 10	160497	74202.4	82531.3	172134	68971.1	84125.9	6248	1344	2513.1	100593	34741.8	40095.1
	PAR4 200	269447	152875	146247	277917	154537	148064	4850.2	1400.6	2490.7	182833	108247	106353
