# Supplementary material for: Fibrinogen αC-subregions critically contribute blood clot fibre growth, mechanical stability, and resistance to fibrinolysis
Source: eLife journal article supplement (doi:10.7554/elife.68761), 2021-10-11
Supplement: supp [file elife_poa_e68761_Figure_6_figure_supplement_1_source_data_1.xlsx]

## Sheet: Sheet1
Time (seconds)	rWT				FGA +/+			FGA -/-
2.125	0	0	0		0	0		0
5.8	0	0	0		0	0.2		0
8.95	0	0	0		0	0.3		0
12.1	0	0	0		0	0.4		0
15.25	0	0	0		0	0.4		0
18.4	0	0	0		0	0.4		0
21.55	0	0	0		0	0.4		0
24.7	0	0	0		0	0.5		0
27.85	0	0	0		0.1	0.7		0
31	0	0	0		1.3	1		0
34.15	0	0	0		2.8	1.4		0
37.3	0	0	0		4.1	1.8		0
40.45	0	0	0		5.5	2.2		0
43.6	0	0.14385	0		6.6	2.7		0
46.75	0	0.61644	0		7.5	3.1		0
49.9	0	1.07875	0		8.3	3.5		0
53.05	0.02631	1.54054	0		9.1	3.9		0
56.2	1.58844	2.00021	0		9.7	4.3		0
59.35	4.16994	2.47814	0		10.4	4.7		0
62.5	5.84833	2.98552	0		11	5.1		0
65.65	6.11443	3.52078	0		11.7	5.5		0
68.8	6.28709	4.08384	0.04445		12.3	5.8		0
71.95	6.48669	4.66816	0.2782		12.9	6.2		0
75.1	6.68324	5.2599	0.53514		13.6	6.7		0
78.25	6.89934	5.85231	0.79559		14.3	7.1		0
81.4	7.11173	6.43348	1.06704		15	7.5		0
84.55	7.31829	7.01028	1.37142		15.6	8		0
87.7	7.50678	7.58257	1.6854		16.3	8.4		0
90.85	7.67592	8.14037	2.01295		17	8.9		0
94	7.83356	8.6782	2.34376		17.7	9.4		0
97.15	7.9771	9.1932	2.66097		18.3	9.9		0
100.3	8.12702	9.6933	2.97629		19	10.4		0
103.45	8.28557	10.1839	3.30511		19.7	10.9		0
106.6	8.44311	10.6622	3.64647		20.3	11.4		0
109.75	8.6104	11.1281	3.99191		21	11.9		0
112.9	8.7958	11.5875	4.3401		21.6	12.3		0
116.05	8.9934	12.0387	4.69122		22.2	12.8		0
119.2	9.1834	12.4741	5.0363		22.8	13.3		0
122.35	9.3585	12.898	5.36131		23.3	13.8		0
125.5	9.524	13.3101	5.66415		23.9	14.2		0
128.65	9.6804	13.7055	5.95357		24.4	14.6		0
131.8	9.8312	14.0783	6.23993		24.9	15.1		0
134.95	9.996	14.4346	6.53609		25.4	15.5		0
138.1	10.2053	14.7774	6.83957		25.8	15.8		0
141.25	10.4911	15.103	7.13668		26.3	16.2		0
144.4	10.8344	15.4161	7.42536		26.7	16.6		0
147.55	11.1615	15.7274	7.70826		27.2	16.9		0
150.7	11.4887	16.0406	7.96598		27.6	17.3		0
153.85	11.7659	16.3475	8.19332		28	17.7		0
157	11.969	16.6554	8.40082		28.4	18		0
160.15	12.1237	16.9667	8.5973		28.9	18.4		0
163.3	12.2584	17.2694	8.7889		29.3	18.7		0
166.45	12.3844	17.5553	8.9772		29.6	19		0
169.6	12.5117	17.8308	9.1688		30	19.3		0
172.75	12.6494	18.0983	9.3624		30.4	19.7		0
175.9	12.7924	18.3515	9.5441		30.7	20		0
179.05	12.9243	18.6099	9.7237		31	20.3		0
182.2	13.0455	18.8667	9.9072		31.4	20.6		0
185.35	13.1747	19.1214	10.0825		31.7	20.9		0
188.5	13.3036	19.3626	10.2503		32	21.1		0
191.65	13.4327	19.6009	10.4192		32.3	21.4		0
194.8	13.5752	19.8303	10.5971		32.5	21.7		0
197.95	13.731	20.045	10.7798		32.8	21.9		0
201.1	13.8962	20.2515	10.9704		33.1	22.2		0
204.25	14.0772	20.4633	11.1645		33.4	22.4		0
207.4	14.2513	20.6771	11.3568		33.7	22.6		0
210.55	14.4188	20.8886	11.551		34	22.9		0
213.7	14.5692	21.0923	11.7418		34.2	23.1		0
216.85	14.7047	21.292	11.9249		34.5	23.3		0
220	14.8406	21.4809	12.0977		34.7	23.5		0
223.15	14.972	21.6642	12.2616		35	23.7		0
226.3	15.0942	21.8325	12.4262		35.2	23.9		0
229.45	15.2145	21.9983	12.5916		35.4	24.2		0
232.6	15.3353	22.1704	12.7542		35.7	24.3		0
235.75	15.4556	22.3537	12.9102		35.9	24.5		0
238.9	15.5723	22.5582	13.0671		36.1	24.7		0
242.05	15.69	22.7484	13.2191		36.4	24.9		0
245.2	15.8095	22.9346	13.3669		36.6	25.1		0
248.35	15.9254	23.1309	13.5083		36.8	25.3		0
251.5	16.0445	23.3293	13.6414		37	25.5		0
254.65	16.1742	23.52	13.7635		37.3	25.7		0
257.8	16.3047	23.7087	13.8819		37.5	25.8		0
260.95	16.431	23.8874	14.0078		37.7	26		0
264.1	16.5541	24.0489	14.1352		37.9	26.2		0
267.25	16.6686	24.1929	14.2625		38.1	26.4		0
270.4	16.7715	24.3444	14.3885		38.3	26.5		0
273.55	16.8648	24.4957	14.5147		38.5	26.7		0
276.7	16.9544	24.6414	14.6358		38.6	26.8		0
279.85	17.0479	24.7892	14.7584		38.8	27		0
283	17.147	24.9396	14.878		39	27.2		0
286.15	17.2451	25.0813	14.9951		39.2	27.3		0
289.3	17.3463	25.2124	15.1107		39.4	27.5		0
292.45	17.4551	25.3274	15.229		39.5	27.7		0
295.6	17.5656	25.4352	15.3496		39.7	27.8		0
298.75	17.6763	25.5486	15.4653		39.8	28		0
301.9	17.7894	25.6695	15.5709		40	28.1		0
305.05	17.9019	25.7999	15.6715		40.2	28.3		0
308.2	18.0095	25.9287	15.7693		40.3	28.4		0
311.35	18.1194	26.0564	15.8638		40.5	28.6		0
314.5	18.2302	26.1809	15.959		40.6	28.7		0
317.65	18.34	26.3045	16.0627		40.8	28.9		0
320.8	18.4436	26.4327	16.1665		40.9	29		0
323.95	18.5473	26.5578	16.2674		41	29.2		0
327.1	18.6523	26.6741	16.3699		41.2	29.3		0
330.25	18.7557	26.7881	16.4735		41.3	29.4		0
333.4	18.8565	26.8889	16.57		41.4	29.6		0
336.55	18.9518	26.9904	16.6617		41.5	29.7		0
339.7	19.0415	27.0965	16.7567		41.7	29.8		0
342.85	19.1237	27.1979	16.8538		41.8	30		0
346	19.1999	27.2957	16.9434		41.9	30.1		0
349.15	19.2814	27.3977	17.0307		42	30.2		0
352.3	19.372	27.5034	17.1141		42.1	30.3		0
355.45	19.4668	27.6063	17.2014		42.3	30.5		0
358.6	19.566	27.7012	17.2858		42.4	30.6		0
361.75	19.6673	27.7972	17.3769		42.5	30.7		0
364.9	19.7683	27.8936	17.4731		42.7	30.8		0
368.05	19.8646	27.9868	17.5636		42.8	30.9		0
371.2	19.9543	28.0926	17.647		43	31		0
374.35	20.0412	28.188	17.736		43.1	31.2		0
377.5	20.1235	28.2754	17.8232		43.2	31.3		0
380.65	20.2017	28.3705	17.9069		43.3	31.4		0
383.8	20.284	28.4647	17.9976		43.4	31.5		0
386.95	20.3732	28.5582	18.0965		43.5	31.6		0
390.1	20.4644	28.6512	18.1889		43.6	31.7		0
393.25	20.5539	28.7551	18.2808		43.7	31.8		0
396.4	20.6447	28.8638	18.373		43.8	31.9		0
399.55	20.7332	28.9626	18.4589		43.9	32		0
402.7	20.8157	29.0618	18.5304		43.9	32.1		0
405.85	20.8954	29.156	18.5989		44	32.2		0
409	20.9758	29.2397	18.6659		44.1	32.3		0
412.15	21.0539	29.3234	18.7258		44.2	32.4		0
415.3	21.1315	29.4078	18.7955		44.2	32.4		0
418.45	21.2129	29.4976	18.8617		44.3	32.5		0
421.6	21.2991	29.595	18.9228		44.4	32.6		0
424.75	21.3852	29.6927	18.9843		44.4	32.7		0
427.9	21.4649	29.7904	19.0549		44.5	32.8		0
431.05	21.5409	29.8815	19.1266		44.6	32.9		0
434.2	21.6218	29.9662	19.1916		44.6	33		0
437.35	21.7043	30.0529	19.2569		44.7	33.1		0
440.5	21.7841	30.1393	19.3339		44.8	33.2		0
443.65	21.8678	30.2197	19.4118		44.8	33.3		0
446.8	21.9485	30.2916	19.4886		44.9	33.3		0
449.95	22.0238	30.3612	19.5654		45	33.4		0
453.1	22.104	30.4329	19.6464		45	33.5		0
456.25	22.1862	30.4985	19.7235		45.1	33.6		0
459.4	22.2691	30.5652	19.7976		45.2	33.7		0
462.55	22.3469	30.6356	19.8796		45.2	33.8		0
465.7	22.4182	30.7108	19.9633		45.3	33.9		0
468.85	22.4902	30.7928	20.0462		45.3	34		0
472	22.5587	30.8858	20.1283		45.4	34		0
475.15	22.6196	30.9824	20.2093		45.4	34.1		0
478.3	22.6777	31.0755	20.2861		45.5	34.2		0
481.45	22.7326	31.1637	20.3586		45.5	34.3		0
484.6	22.787	31.2523	20.4285		45.6	34.3		0
487.75	22.8459	31.3392	20.4947		45.6	34.4		0
490.9	22.9114	31.4166	20.5539		45.7	34.5		0
494.05	22.9794	31.4885	20.6101		45.7	34.6		0
497.2	23.0465	31.5556	20.6714		45.7	34.6		0
500.35	23.1138	31.6176	20.733		45.8	34.7		0
503.5	23.1828	31.6794	20.7917		45.8	34.8		0
506.65	23.2509	31.7508	20.8564		45.9	34.8		0
509.8	23.3164	31.825	20.9287		45.9	34.9		0
512.95	23.3825	31.8919	21.0049		46	35		0
516.1	23.4473	31.9587	21.0811		46	35.1		0
519.25	23.5089	32.0324	21.1553		46.1	35.1		0
522.4	23.5709	32.1096	21.2292		46.2	35.2		0
525.55	23.6372	32.1935	21.2983		46.2	35.3		0
528.7	23.7046	32.2767	21.3695		46.3	35.3		0
531.85	23.7708	32.3607	21.445		46.3	35.4		0
535	23.8361	32.4557	21.5096		46.4	35.5		0
538.15	23.9034	32.5456	21.5712		46.4	35.5		0
541.3	23.9724	32.6335	21.6367		46.5	35.6		0
544.45	24.0373	32.7111	21.7019		46.5	35.6		0
547.6	24.0993	32.772	21.7629		46.6	35.7		0
550.75	24.1585	32.8334	21.8199		46.6	35.8		0
553.9	24.212	32.9024	21.8769		46.7	35.8		0
557.05	24.2665	32.9622	21.9303		46.7	35.9		0
560.2	24.3272	33.0225	21.9833		46.8	35.9		0
563.35	24.3881	33.0875	22.0396		46.8	36		0
566.5	24.4434	33.1535	22.0946		46.9	36.1		0
569.65	24.4966	33.2186	22.1439		47	36.1		0
572.8	24.5575	33.2843	22.1955		47	36.2		0
575.95	24.6263	33.3486	22.2514		47.1	36.2		0
579.1	24.6879	33.4093	22.3113		47.1	36.3		0
582.25	24.7473	33.4717	22.371		47.1	36.3		0
585.4	24.8071	33.5395	22.4291		47.2	36.4		0
588.55	24.8642	33.607	22.4899		47.2	36.4		0
591.7	24.9184	33.6673	22.5471		47.2	36.5		0
594.85	24.9754	33.7256	22.5995		47.3	36.6		0
598	25.0319	33.7818	22.6489		47.3	36.6		0
601.15	25.0834	33.8334	22.6974		47.4	36.7		0
604.3	25.131	33.8873	22.7446		47.4	36.7		0
607.45	25.1826	33.9543	22.7937		47.5	36.8		0
610.6	25.2414	34.0227	22.8486		47.5	36.8		0
613.75	25.3014	34.09	22.9067		47.6	36.9		0
616.9	25.3619	34.156	22.957		47.6	36.9		0
620.05	25.4249	34.2229	23.0104		47.7	37		0
623.2	25.4868	34.2919	23.0665		47.7	37.1		0
626.35	25.5456	34.3532	23.1153		47.8	37.1		0
629.5	25.6014	34.4063	23.1601		47.8	37.2		0
632.65	25.6594	34.4678	23.2045		47.8	37.2		0
635.8	25.7122	34.5346	23.2491		47.9	37.3		0
638.95	25.756	34.6011	23.2872		47.9	37.3		0
642.1	25.7981	34.6702	23.3343		47.9	37.4		0
645.25	25.8449	34.7295	23.3835		48	37.4		0
648.4	25.8908	34.7729	23.4282		48	37.5		0
651.55	25.9281	34.8268	23.4725		48	37.5		0
654.7	25.9655	34.8797	23.5287		48.1	37.6		0
657.85	26.009	34.9309	23.5811		48.1	37.6		0
661	26.0485	34.9754	23.6251		48.1	37.7		0
664.15	26.0896	35.024	23.6605		48.2	37.7		0
667.3	26.1413	35.0813	23.7018		48.2	37.8		0
670.45	26.1936	35.141	23.7433		48.3	37.8		0
673.6	26.2391	35.2	23.7863		48.3	37.9		0
676.75	26.2846	35.2565	23.8368		48.3	37.9		0
679.9	26.3341	35.3075	23.8814		48.4	38		0
683.05	26.3813	35.3582	23.9264		48.4	38		0
686.2	26.4237	35.4115	23.9765		48.5	38.1		0
689.35	26.4744	35.467	24.0285		48.5	38.2		0
692.5	26.5158	35.5171	24.0774		48.5	38.2		0
695.65	26.5535	35.565	24.1242		48.6	38.3		0
698.8	26.5986	35.6173	24.1746		48.6	38.3		0
701.95	26.649	35.6687	24.229		48.6	38.4		0
705.1	26.6977	35.7193	24.2771		48.7	38.4		0
708.25	26.7438	35.7728	24.3243		48.7	38.5		0
711.4	26.786	35.8255	24.3739		48.8	38.5		0
714.55	26.8348	35.871	24.4179		48.8	38.6		0
717.7	26.8918	35.9134	24.4587		48.8	38.6		0
720.85	26.9474	35.9665	24.5042		48.9	38.7		0
724	26.9998	36.0217	24.5502		48.9	38.7		0
727.15	27.0526	36.0645	24.5906		49	38.7		0
730.3	27.1066	36.1128	24.6287		49	38.8		0
733.45	27.1582	36.1734	24.674		49	38.8		0
736.6	27.2095	36.2417	24.7174		49.1	38.9		0
739.75	27.2614	36.3001	24.752		49.1	38.9		0
742.9	27.3054	36.3402	24.7938		49.1	38.9		0
746.05	27.3401	36.3911	24.8405		49.1	39		0
749.2	27.3825	36.444	24.8885		49.2	39		0
752.35	27.4264	36.5078	24.9366		49.2	39.1		0
755.5	27.4646	36.5704	24.9825		49.2	39.1		0
758.65	27.5029	36.6249	25.0247		49.3	39.1		0
761.8	27.5459	36.6808	25.0662		49.3	39.2		0
764.95	27.5893	36.7362	25.1108		49.3	39.2		0
768.1	27.6345	36.7852	25.167		49.4	39.3		0
771.25	27.6791	36.8302	25.223		49.4	39.3		0
774.4	27.7204	36.8722	25.2784		49.5	39.3		0
777.55	27.7623	36.9172	25.3377		49.5	39.4		0
780.7	27.8047	36.9676	25.3959		49.5	39.4		0
783.85	27.8524	37.0234	25.4469		49.6	39.4		0
787	27.91	37.0874	25.487		49.6	39.4		0
790.15	27.9671	37.1506	25.52		49.6	39.5		0
793.3	28.0201	37.2066	25.5471		49.6	39.5		0
796.45	28.0729	37.255	25.5725		49.6	39.5		0
799.6	28.1233	37.2963	25.6023		49.7	39.6		0
802.75	28.1727	37.3358	25.6328		49.7	39.6		0
805.9	28.2207	37.3743	25.6629		49.7	39.6		0
809.05	28.2632	37.4108	25.6946		49.8	39.7		0
812.2	28.2994	37.452	25.7382		49.8	39.7		0
815.35	28.3314	37.4904	25.7879		49.9	39.7		0
818.5	28.366	37.538	25.8314		49.9	39.7		0
821.65	28.4106	37.5893	25.8744		49.9	39.8		0
824.8	28.4554	37.633	25.9212		50	39.8		0
827.95	28.4976	37.6773	25.9627		50	39.8		0
831.1	28.5408	37.7298	25.9965		50	39.9		0
834.25	28.5843	37.7902	26.0286		50.1	39.9		0
837.4	28.628	37.8474	26.0553		50.1	39.9		0
840.55	28.6694	37.9008	26.0825		50.1	40		0
843.7	28.706	37.9503	26.116		50.1	40		0
846.85	28.7373	37.9993	26.1609		50.1	40		0
850	28.759	38.0428	26.207		50.2	40.1		0
853.15	28.7847	38.0805	26.2484		50.2	40.1		0
856.3	28.8188	38.1183	26.2907		50.2	40.1		0
859.45	28.8516	38.1596	26.3356		50.3	40.1		0
862.6	28.8837	38.209	26.375		50.3	40.2		0
865.75	28.917	38.2636	26.4054		50.3	40.2		0
868.9	28.9525	38.3195	26.4333		50.4	40.2		0
872.05	28.9905	38.3669	26.4667		50.4	40.3		0
875.2	29.0262	38.4055	26.507		50.4	40.3		0
878.35	29.0599	38.4495	26.5526		50.4	40.3		0
881.5	29.0926	38.492	26.5931		50.5	40.3		0
884.65	29.1193	38.5297	26.6269		50.5	40.3		0
887.8	29.1483	38.5734	26.6621		50.5	40.3		0
890.95	29.1834	38.6195	26.7059		50.6	40.4		0
894.1	29.2214	38.6665	26.7516		50.6	40.4		0
897.25	29.2572	38.7131	26.7889		50.6	40.4		0
900.4	29.2916	38.7612	26.8257		50.6	40.4		0
903.55	29.3305	38.8042	26.8622		50.7	40.4		0
906.7	29.3703	38.8388	26.8969		50.7	40.5		0
909.85	29.4056	38.8747	26.9359		50.7	40.5		0
913	29.4413	38.9242	26.9774		50.7	40.5		0
916.15	29.48	38.9862	27.014		50.8	40.5		0
919.3	29.5176	39.0516	27.0454		50.8	40.6		0
922.45	29.5555	39.1171	27.0805		50.8	40.6		0
925.6	29.5946	39.184	27.1192		50.8	40.6		0
928.75	29.6329	39.2447	27.1568		50.9	40.6		0
931.9	29.6685	39.2906	27.1904		50.9	40.7		0
935.05	29.7034	39.3203	27.2265		50.9	40.7		0
938.2	29.7407	39.3456	27.2595		50.9	40.7		0
941.35	29.7807	39.374	27.2888		50.9	40.7		0
944.5	29.8164	39.4079	27.322		50.9	40.7		0
947.65	29.8472	39.4508	27.3567		51	40.7		0
950.8	29.8798	39.5036	27.3872		51	40.8		0
953.95	29.9137	39.5516	27.413		51	40.8		0
957.1	29.9475	39.5971	27.4421		51	40.8		0
960.25	29.9847	39.6361	27.4767		51.1	40.8		0
963.4	30.0272	39.6711	27.5138		51.1	40.8		0
966.55	30.068	39.7081	27.5513		51.1	40.9		0
969.7	30.1017	39.7462	27.5957		51.2	40.9		0
972.85	30.1309	39.7978	27.6422		51.2	40.9		0
976	30.1624	39.8522	27.6862		51.2	40.9		0
979.15	30.1913	39.8987	27.7307		51.2	40.9		0
982.3	30.2178	39.953	27.7745		51.2	40.9		0
985.45	30.2455	40.0041	27.8128		51.3	41		0
988.6	30.2751	40.039	27.8483		51.3	41		0
991.75	30.3074	40.0669	27.8851		51.3	41		0
994.9	30.3409	40.0964	27.9197		51.3	41		0
998.05	30.3754	40.1448	27.9496		51.3	41		0
1001.2	30.4067	40.1796	27.9826		51.3	41		0
1004.35	30.4284	40.2129	28.0258		51.4	41		0
1007.5	30.4488	40.2544	28.0718		51.4	41		0
1010.65	30.4757	40.2854	28.1192		51.4	41.1		0
1013.8	30.5023	40.3165	28.1741		51.4	41.1		0
1016.95	30.5284	40.3464	28.2251		51.4	41.1		0
1020.1	30.5588	40.3814	28.2736		51.5	41.1		0
1023.25	30.5927	40.4122	28.3142		51.5	41.1		0
1026.4	30.6277	40.4573	28.3506		51.5	41.1		0
1029.55	30.6588	40.5149	28.3724		51.6	41.1		0
1032.7	30.6918	40.5712	28.3922		51.6	41.2		0
1035.85	30.7229	40.6071	28.4195		51.6	41.2		0
1039	30.7454	40.6559	28.4493		51.6	41.2		0
1042.15	30.7712	40.7062	28.4784		51.7	41.2		0
1045.3	30.7998	40.7458	28.5085		51.7	41.2		0
1048.45	30.8254	40.781	28.5451		51.7	41.2		0
1051.6	30.8503	40.807	28.5791		51.7	41.2		0
1054.75	30.8751	40.8266	28.6083		51.7	41.2		0
1057.9	30.9011	40.8512	28.6414		51.7	41.2		0
1061.05	30.9307	40.8714	28.6737		51.8	41.2		0
1064.2	30.956	40.8909	28.7036		51.8	41.3		0
1067.35	30.9832	40.9175	28.7361		51.8	41.3		0
1070.5	31.011	40.945	28.7729		51.8	41.3		0
1073.65	31.0296	40.968	28.8094		51.9	41.3		0
1076.8	31.0443	40.9883	28.8392		51.9	41.3		0
1079.95	31.0662	41.0137	28.866		51.9	41.3		0
1083.1	31.0949	41.0404	28.8922		51.9	41.4		0
1086.25	31.1236	41.0629	28.9126		51.9	41.4		0
1089.4	31.1489	41.09	28.9314		51.9	41.4		0
1092.55	31.1786	41.1212	28.9527		51.9	41.4		0
1095.7	31.2095	41.143	28.9766		52	41.4		0
1098.85	31.2338	41.1626	29.0025		52	41.5		0
1102	31.259	41.1843	29.0348		52	41.5		0
1105.15	31.2819	41.2039	29.0699		52	41.5		0
1108.3	31.3014	41.2199	29.0953		52.1	41.5		0
1111.45	31.3224	41.2377	29.1198		52.1	41.5		0
1114.6	31.3496	41.2707	29.1508		52.1	41.5		0
1117.75	31.3823	41.3036	29.1842		52.1	41.6		0
1120.9	31.4112	41.3353	29.2067		52.1	41.6		0
1124.05	31.4376	41.3665	29.2297		52.2	41.6		0
1127.2	31.4669	41.3998	29.262		52.2	41.6		0
1130.35	31.5015	41.4123	29.3011		52.2	41.6		0
1133.5	31.5327	41.4275	29.3401		52.2	41.6		0
1136.65	31.5594	41.4448	29.3763		52.2	41.7		0
1139.8	31.5868	41.4662	29.4042		52.2	41.7		0
1142.95	31.6135	41.4909	29.43		52.3	41.7		0
1146.1	31.6375	41.521	29.462		52.3	41.7		0
1149.25	31.6574	41.5601	29.4952		52.3	41.7		0
1152.4	31.6792	41.597	29.5281		52.3	41.7		0
1155.55	31.7006	41.6288	29.5543		52.3	41.7		0
1158.7	31.7205	41.6607	29.5792		52.3	41.8		0
1161.85	31.7441	41.6892	29.6066		52.4	41.8		0
1165	31.7736	41.7149	29.6308		52.4	41.8		0
1168.15	31.8019	41.7409	29.6488		52.4	41.8		0
1171.3	31.8261	41.7669	29.6657		52.4	41.8		0
1174.45	31.8494	41.789	29.6861		52.4	41.9		0
1177.6	31.87	41.8033	29.7085		52.4	41.9		0
1180.75	31.8889	41.823	29.7388		52.5	41.9		0
1183.9	31.9071	41.8494	29.7713		52.5	41.9		0
1187.05	31.9315	41.876	29.799		52.5	42		0
1190.2	31.9605	41.9084	29.8194		52.5	42		0
1193.35	31.9861	41.9443	29.8378		52.5	42		0
1196.5	32.0124	41.9798	29.8643		52.5	42		0
1199.65	32.044	42.0083	29.8905		52.6	42		0
1202.8	32.0747	42.0336	29.9171		52.6	42		0
1205.95	32.0962	42.0526	29.9476		52.6	42		0
1209.1	32.1138	42.0742	29.9776		52.6	42.1		0
1212.25	32.1374	42.0978	30.0053		52.6	42.1		0
1215.4	32.1642	42.131	30.032		52.6	42.1		0
1218.55	32.1941	42.1688	30.0537		52.6	42.1		0
1221.7	32.2237	42.2024	30.0639		52.7	42.1		0
1224.85	32.2507	42.2457	30.0783		52.7	42.1		0
1228	32.2694	42.2866	30.0966		52.7	42.1		0
1231.15	32.293	42.323	30.12		52.7	42.2		0
1234.3	32.3235	42.3605	30.1329		52.7	42.2		0
1237.45	32.3535	42.3985	30.153		52.7	42.2		0
1240.6	32.378	42.4309	30.1758		52.8	42.2		0
1243.75	32.4018	42.4605	30.2001		52.8	42.2		0
1246.9	32.4279	42.4913	30.2323		52.8	42.3		0
1250.05	32.4517	42.5201	30.2619		52.8	42.3		0
1253.2	32.4695	42.5394	30.2872		52.8	42.3		0
1256.35	32.4874	42.5514	30.3113		52.8	42.3		0
1259.5	32.5045	42.5673	30.3368		52.8	42.4		0
1262.65	32.5206	42.5769	30.3657		52.9	42.4		0
1265.8	32.5388	42.5882	30.3883		52.9	42.4		0
1268.95	32.5636	42.6059	30.4049		52.9	42.4		0
1272.1	32.5919	42.628	30.4259		52.9	42.4		0
1275.25	32.6185	42.6535	30.4452		52.9	42.4		0
1278.4	32.6413	42.6942	30.4593		53	42.4		0
1281.55	32.6646	42.7398	30.4725		53	42.4		0
1284.7	32.6888	42.7812	30.4827		53	42.4		0
1287.85	32.7103	42.8125	30.4899		53	42.4		0
1291	32.7319	42.848	30.4943		53	42.5		0
1294.15	32.7536	42.8839	30.505		53	42.5		0
1297.3	32.7726	42.9177	30.5257		53	42.5		0
1300.45	32.7906	42.9456	30.5455		53.1	42.5		0
1303.6	32.8098	42.9737	30.5641		53.1	42.5		0
1306.75	32.8319	43.0026	30.5925		53.1	42.5		0
1309.9	32.8519	43.027	30.6192		53.1	42.5		0
1313.05	32.8679	43.0487	30.6403		53.1	42.6		0
1316.2	32.8851	43.0767	30.6655		53.1	42.6		0
1319.35	32.905	43.0966	30.6892		53.1	42.6		0
1322.5	32.9238	43.1043	30.7109		53.1	42.6		0
1325.65	32.9417	43.1106	30.7349		53.2	42.6		0
1328.8	32.9644	43.1191	30.7603		53.2	42.7		0
1331.95	32.9898	43.1307	30.7848		53.2	42.7		0
1335.1	33.0135	43.1463	30.8029		53.2	42.7		0
1338.25	33.0368	43.1721	30.8223		53.2	42.7		0
1341.4	33.0606	43.2112	30.8475		53.3	42.7		0
1344.55	33.0794	43.2631	30.8706		53.3	42.7		0
1347.7	33.0949	43.3157	30.8931		53.3	42.7		0
1350.85	33.1149	43.3601	30.9194		53.3	42.8		0
1354	33.1356	43.3866	30.9429		53.3	42.8		0
1357.15	33.1551	43.3951	30.9609		53.3	42.8		0
1360.3	33.1751	43.396	30.9836		53.4	42.8		0
1363.45	33.1966	43.3993	31.0075		53.4	42.8		0
1366.6	33.218	43.4063	31.0283		53.4	42.8		0
1369.75	33.2375	43.4165	31.0522		53.4	42.8		0
1372.9	33.2546	43.4377	31.0805		53.4	42.8		0
1376.05	33.2721	43.4697	31.1088		53.4	42.9		0
1379.2	33.291	43.5038	31.1321		53.4	42.9		0
1382.35	33.3096	43.5388	31.1485		53.5	42.9		0
1385.5	33.3329	43.5693	31.1677		53.5	42.9		0
1388.65	33.3616	43.5904	31.1862		53.5	42.9		0
1391.8	33.3899	43.6112	31.2045		53.5	42.9		0
1394.95	33.4167	43.6328	31.2365		53.5	43		0
1398.1	33.44	43.6474	31.2708		53.5	43		0
1401.25	33.4601	43.6653	31.3		53.6	43		0
1404.4	33.4781	43.684	31.3292		53.6	43		0
1407.55	33.4934	43.7022	31.3591		53.6	43		0
1410.7	33.5133	43.724	31.3829		53.6	43		0
1413.85	33.5389	43.7538	31.3999		53.6	43		0
1417	33.5621	43.7882	31.4163		53.6	43		0
1420.15	33.5876	43.8231	31.4411		53.6	43		0
1423.3	33.6155	43.8516	31.4661		53.6	43.1		0
1426.45	33.642	43.8823	31.4931		53.6	43.1		0
1429.6	33.6665	43.9105	31.5248		53.7	43.1		0
1432.75	33.691	43.9333	31.5554		53.7	43.1		0
1435.9	33.7176	43.9544	31.578		53.7	43.1		0
1439.05	33.7411	43.9714	31.5974		53.7	43.1		0
1442.2	33.7645	43.9918	31.6149		53.7	43.2		0
1445.35	33.7937	44.014	31.6259		53.7	43.2		0
1448.5	33.8231	44.0331	31.6356		53.8	43.2		0
1451.65	33.8469	44.0515	31.6512		53.8	43.2		0
1454.8	33.8673	44.0682	31.6673		53.8	43.2		0
1457.95	33.8886	44.0859	31.6778		53.8	43.2		0
1461.1	33.9112	44.1076	31.6915		53.8	43.2		0
1464.25	33.9326	44.1306	31.7077		53.8	43.2		0
1467.4	33.9539	44.1492	31.7233		53.8	43.2		0
1470.55	33.9826	44.1651	31.738		53.8	43.2		0
1473.7	34.0114	44.1848	31.7608		53.8	43.3		0
1476.85	34.0384	44.2073	31.7852		53.8	43.3		0
1480	34.067	44.2283	31.8052		53.8	43.3		0
1483.15	34.0954	44.2495	31.8264		53.9	43.3		0
1486.3	34.1198	44.273	31.8509		53.9	43.3		0
1489.45	34.1404	44.2942	31.8702		53.9	43.3		0
1492.6	34.1584	44.3164	31.8775		53.9	43.4		0
1495.75	34.1766	44.3404	31.8872		53.9	43.4		0
1498.9	34.191	44.3651	31.8995		53.9	43.4		0
1502.05	34.2037	44.3802	31.9111		53.9	43.4		0
1505.2	34.2204	44.4002	31.9283		53.9	43.4		0
1508.35	34.2362	44.4212	31.9471		54	43.4		0
1511.5	34.2529	44.4385	31.9646		54	43.4		0
1514.65	34.2753	44.4531	31.9837		54	43.5		0
1517.8	34.3044	44.4693	32.0078		54	43.5		0
1520.95	34.3363	44.4927	32.0314		54	43.5		0
1524.1	34.3643	44.5108	32.0499		54	43.5		0
1527.25	34.3887	44.529	32.0672		54	43.5		0
1530.4	34.4162	44.556	32.0872		54	43.5		0
1533.55	34.4411	44.5894	32.1163		54.1	43.6		0
1536.7	34.4583	44.6223	32.1443		54.1	43.6		0
1539.85	34.4753	44.6579	32.1694		54.1	43.6		0
1543	34.4918	44.692	32.1968		54.1	43.6		0
1546.15	34.5083	44.7166	32.2231		54.1	43.6		0
1549.3	34.5275	44.7332	32.2469		54.1	43.6		0
1552.45	34.5497	44.7501	32.2669		54.1	43.6		0
1555.6	34.5706	44.7637	32.2826		54.1	43.6		0
1558.75	34.5859	44.7707	32.2999		54.2	43.6		0
1561.9	34.5998	44.7826	32.3181		54.2	43.6		0
1565.05	34.6213	44.8033	32.3451		54.2	43.6		0
1568.2	34.6421	44.8329	32.3767		54.2	43.6		0
1571.35	34.6565	44.8667	32.4021		54.2	43.6		0
1574.5	34.6703	44.899	32.4261		54.2	43.6		0
1577.65	34.6884	44.931	32.4481		54.2	43.6		0
1580.8	34.7058	44.9514	32.4667		54.2	43.7		0
1583.95	34.726	44.9791	32.4878		54.2	43.7		0
1587.1	34.7523	45.0116	32.5066		54.2	43.7		0
1590.25	34.7759	45.0398	32.5299		54.2	43.7		0
1593.4	34.794	45.0588	32.5511		54.2	43.7		0
1596.55	34.8132	45.075	32.5802		54.2	43.7		0
1599.7	34.8383	45.0929	32.6119		54.2	43.7		0
1602.85	34.865	45.1085	32.6373		54.3	43.8		0
1606	34.8873	45.1121	32.6565		54.3	43.8		0
1609.15	34.9077	45.1204	32.6815		54.3	43.8		0
1612.3	34.9283	45.1332	32.6989		54.3	43.8		0
1615.45	34.949	45.1445	32.7131		54.3	43.8		0
1618.6	34.9682	45.1641	32.73		54.3	43.8		0
1621.75	34.986	45.1916	32.7486		54.3	43.8		0
1624.9	35.0022	45.2165	32.7688		54.3	43.8		0
1628.05	35.0145	45.242	32.7906		54.4	43.8		0
1631.2	35.0265	45.2695	32.8224		54.4	43.8		0
1634.35	35.0438	45.2993	32.8519		54.4	43.9		0
1637.5	35.0671	45.3273	32.8759		54.4	43.9		0
1640.65	35.0902	45.3519	32.8984		54.4	43.9		0
1643.8	35.1122	45.3788	32.9212		54.4	43.9		0
1646.95	35.1333	45.4015	32.9383		54.4	43.9		0
1650.1	35.1565	45.4239	32.9464		54.4	43.9		0
1653.25	35.1781	45.449	32.9519		54.4	43.9		0
1656.4	35.1954	45.4657	32.9636		54.4	43.9		0
1659.55	35.2123	45.4765	32.9736		54.5	44		0
1662.7	35.2271	45.4894	32.9958		54.5	44		0
1665.85	35.2396	45.5046	33.0213		54.5	44		0
1669	35.2543	45.5237	33.0382		54.5	44		0
1672.15	35.2724	45.5376	33.0556		54.5	44		0
1675.3	35.2876	45.5569	33.0759		54.5	44		0
1678.45	35.3004	45.5851	33.1012		54.5	44		0
1681.6	35.3142	45.616	33.123		54.5	44		0
1684.75	35.3318	45.6448	33.1385		54.5	44		0
1687.9	35.3472	45.6765	33.1583		54.5	44.1		0
1691.05	35.3603	45.6958	33.1696		54.5	44.1		0
1694.2	35.3773	45.7115	33.1824		54.5	44.1		0
1697.35	35.3922	45.729	33.1964		54.6	44.1		0
1700.5	35.4059	45.746	33.2096		54.6	44.1		0
1703.65	35.4248	45.7584	33.2233		54.6	44.1		0
1706.8	35.4465	45.7635	33.2393		54.6	44.1		0
1709.95	35.4675	45.7741	33.257		54.6	44.1		0
1713.1	35.4847	45.7884	33.2826		54.6	44.1		0
1716.25	35.5023	45.806	33.3047		54.6	44.1		0
1719.4	35.5245	45.8321	33.3226		54.6	44.1		0
1722.55	35.5434	45.8608	33.3428		54.6	44.1		0
1725.7	35.5548	45.8848	33.3579		54.6	44.1		0
1728.85	35.5656	45.9102	33.3685		54.6	44.2		0
1732	35.576	45.9362	33.3801		54.7	44.2		0
1735.15	35.5882	45.9609	33.3934		54.7	44.2		0
1738.3	35.6069	45.9796	33.4083		54.7	44.2		0
1741.45	35.6282	45.9965	33.4234		54.7	44.2		0
1744.6	35.6506	46.0138	33.4406		54.7	44.2		0
1747.75	35.6671	46.0298	33.4568		54.7	44.2		0
1750.9	35.6829	46.0491	33.4688		54.7	44.2		0
1754.05	35.7022	46.0698	33.4852		54.7	44.2		0
1757.2	35.7209	46.0865	33.5087		54.7	44.2		0
1760.35	35.7319	46.0963	33.5325		54.7	44.2		0
1763.5	35.7429	46.1069	33.5571		54.7	44.3		0
1766.65	35.7579	46.1215	33.5836		54.7	44.3		0
1769.8	35.7782	46.1315	33.6111		54.7	44.3		0
1772.95	35.7944	46.1412	33.6331		54.8	44.3		0
1776.1	35.8109	46.1559	33.6526		54.8	44.3		0
1779.25	35.8247	46.1684	33.6721		54.8	44.3		0
1782.4	35.832	46.1907	33.6834		54.8	44.3		0
1785.55	35.8412	46.2112	33.6951		54.8	44.3		0
1788.7	35.8587	46.2348	33.7132		54.8	44.3		0
1791.85	35.8725	46.254	33.7312		54.8	44.3		0
1795	35.8808	46.2679	33.7401		54.8	44.3		0
1798.15	35.8895	46.2789	33.7464		54.8	44.4		0
1801.3	35.9025	46.29	33.7574		54.8	44.4		0
1804.45	35.9134	46.2912	33.7688		54.8	44.4		0
1807.6	35.9235	46.2882	33.782		54.8	44.4		0
1810.75	35.9375	46.2938	33.7952		54.9	44.4		0
1813.9	35.954	46.3027	33.8072		54.9	44.4		0
1817.05	35.9674	46.315	33.8132		54.9	44.4		0
1820.2	35.9791	46.3307	33.8218		54.9	44.4		0
1823.35	35.994	46.3555	33.8372		54.9	44.4		0
1826.5	36.0085	46.3782	33.8529		54.9	44.4		0
1829.65	36.0163	46.3956	33.8696		54.9	44.4		0
1832.8	36.0244	46.4158	33.8911		54.9	44.4		0
1835.95	36.0346	46.4326	33.917		54.9	44.5		0
1839.1	36.0463	46.4463	33.9419		54.9	44.5		0
1842.25	36.0603	46.4609	33.9628		54.9	44.5		0
1845.4	36.0767	46.4752	33.9824		54.9	44.5		0
1848.55	36.0964	46.4882	33.9963		54.9	44.5		0
1851.7	36.1132	46.4997	34.0072		54.9	44.5		0
1854.85	36.125	46.5144	34.0192		54.9	44.5		0
1858	36.1391	46.533	34.0307		54.9	44.5		0
1861.15	36.1528	46.5496	34.0378		54.9	44.5		0
1864.3	36.1641	46.5734	34.0448		54.9	44.5		0
1867.45	36.1726	46.6014	34.0544		55	44.5		0
1870.6	36.1826	46.6253	34.0649		55	44.5		0
1873.75	36.198	46.6431	34.07		55	44.5		0
1876.9	36.2134	46.6639	34.0766		55	44.6		0
1880.05	36.2279	46.691	34.0871		55	44.6		0
1883.2	36.244	46.7142	34.0906		55	44.6		0
1886.35	36.2565	46.7366	34.093		55	44.6		0
1889.5	36.2689	46.7599	34.0949		55	44.6		0
1892.65	36.2856	46.7757	34.0988		55	44.6		0
1895.8	36.3052	46.7866	34.1017		55	44.6		0
1898.95	36.327	46.7975	34.1068		55	44.6		0
1902.1	36.3474	46.8004	34.1217		55	44.6		0
1905.25	36.3677	46.8045	34.1347		55	44.6		0
1908.4	36.3897	46.809	34.146		55	44.6		0
1911.55	36.4089	46.8197	34.1627		55.1	44.6		0
1914.7	36.4212	46.8367	34.1862		55.1	44.6		0
1917.85	36.4308	46.8526	34.2088		55.1	44.6		0
1921	36.4354	46.8686	34.2276		55.1	44.6		0
1924.15	36.4378	46.8877	34.2498		55.1	44.6		0
1927.3	36.4425	46.9066	34.2715		55.1	44.6		0
1930.45	36.4495	46.9252	34.2869		55.1	44.6		0
1933.6	36.4594	46.9436	34.3011		55.1	44.7		0
1936.75	36.4659	46.9599	34.3134		55.1	44.7		0
1939.9	36.4758	46.9736	34.324		55.1	44.7		0
1943.05	36.4898	46.9877	34.3339		55.1	44.7		0
1946.2	36.4998	47.0005	34.3516		55.1	44.7		0
1949.35	36.5055	47.0117	34.3729		55.2	44.7		0
1952.5	36.5108	47.0215	34.3912		55.2	44.7		0
1955.65	36.5149	47.0382	34.411		55.2	44.7		0
1958.8	36.5157	47.0592	34.4309		55.2	44.7		0
1961.95	36.518	47.0795	34.4462		55.2	44.7		0
1965.1	36.5248	47.1002	34.4579		55.2	44.7		0
1968.25	36.5348	47.1248	34.4737		55.2	44.7		0
1971.4	36.5439	47.1458	34.4858		55.2	44.7		0
1974.55	36.552	47.1596	34.4949		55.2	44.8		0
1977.7	36.5605	47.1611	34.5069		55.2	44.8		0
1980.85	36.5628	47.1688	34.5267		55.2	44.8		0
1984	36.558	47.171	34.5513		55.2	44.8		0
1987.15	36.5541	47.1881	34.5642		55.2	44.8		0
1990.3	36.5527	47.2062	34.5807		55.2	44.8		0
1993.45	36.5521	47.2254	34.6035		55.2	44.8		0
1996.6	36.552	47.2409	34.6302		55.2	44.8		0
1999.75	36.559	47.2549	34.6529		55.2	44.8		0
2002.9	36.5772	47.2732	34.672		55.2	44.8		0
2006.05	36.5949	47.2828	34.6841		55.2	44.8		0
2009.2	36.6119	47.2897	34.6978		55.2	44.8		0
2012.35	36.635	47.3001	34.7184		55.2	44.8		0
2015.5	36.6625	47.3102	34.7384		55.2	44.8		0
2018.65	36.6852	47.3206	34.7535		55.2	44.8		0
2021.8	36.7025	47.3358	34.7624		55.2	44.8		0
2024.95	36.7196	47.3617	34.7781		55.2	44.8		0
2028.1	36.7328	47.3915	34.8004		55.2	44.8		0
2031.25	36.7396	47.4115	34.8177		55.2	44.9		0
2034.4	36.747	47.4306	34.8315		55.2	44.9		0
2037.55	36.7532	47.4454	34.8439		55.2	44.9		0
2040.7	36.7565	47.4497	34.8568		55.2	44.9		0
2043.85	36.7594	47.4504	34.8705		55.2	44.9		0
2047	36.7668	47.4544	34.8818		55.2	44.9		0
2050.15	36.7809	47.461	34.8942		55.3	44.9		0
2053.3	36.7981	47.4705	34.9049		55.2	44.9		0
2056.45	36.8161	47.4886	34.9193		55.2	44.9		0
2059.6	36.8363	47.5123	34.9406		55.2	44.9		0
2062.75	36.8565	47.5373	34.9644		55.2	44.9		0
2065.9	36.8715	47.5546	34.9839		55.3	44.9		0
2069.05	36.8825	47.5727	35.0014		55.3	44.9		0
2072.2	36.8946	47.5857	35.018		55.3	44.9		0
2075.35	36.9037	47.5914	35.0277		55.3	44.9		0
2078.5	36.9097	47.6014	35.0381		55.3	44.9		0
2081.65	36.9183	47.6106	35.0525		55.3	45		0
2084.8	36.9316	47.62	35.0577		55.3	45		0
2087.95	36.9452	47.6266	35.063		55.3	45		0
2091.1	36.9585	47.6388	35.0713		55.3	45		0
2094.25	36.9781	47.6522	35.0824		55.3	45		0
2097.4	37.0002	47.6626	35.098		55.3	45		0
2100.55	37.0152	47.676	35.1112		55.3	45		0
2103.7	37.0272	47.6911	35.127		55.3	45		0
2106.85	37.0377	47.7027	35.1423		55.3	45		0
2110	37.0428	47.7171	35.1582		55.3	45		0
2113.15	37.0437	47.7362	35.1818		55.3	45		0
2116.3	37.0458	47.7612	35.205		55.3	45		0
2119.45	37.0547	47.7873	35.2236		55.3	45		0
2122.6	37.0639	47.812	35.2454		55.3	45		0
2125.75	37.0705	47.8391	35.272		55.3	45		0
2128.9	37.0809	47.8622	35.2978		55.3	45		0
2132.05	37.0968	47.8784	35.3169		55.3	45		0
2135.2	37.1123	47.8925	35.3344		55.3	45.1		0
2138.35	37.1269	47.9002	35.357		55.3	45.1		0
2141.5	37.1399	47.9037	35.3779		55.3	45.1		0
2144.65	37.1524	47.909	35.3951		55.3	45.1		0
2147.8	37.1673	47.9212	35.4131		55.3	45.1		0
2150.95	37.1792	47.9361	35.4243		55.4	45.1		0
2154.1	37.1891	47.9458	35.4336		55.4	45.1		0
2157.25	37.1956	47.9619	35.4443		55.4	45.1		0
2160.4	37.1965	47.9818	35.4517		55.4	45.1		0
2163.55	37.1995	48.0003	35.4595		55.4	45.1		0
2166.7	37.2084	48.0211	35.4634		55.4	45.1		0
2169.85	37.2151	48.0413	35.4736		55.4	45.1		0
2173	37.2199	48.0587	35.4871		55.4	45.1		0
2176.15	37.2242	48.0736	35.4998		55.4	45.1		0
2179.3	37.2336	48.0894	35.5075		55.4	45.1		0
2182.45	37.2475	48.1085	35.5187		55.4	45.1		0
2185.6	37.2595	48.1228	35.5331		55.4	45.1		0
2188.75	37.2745	48.131	35.5472		55.4	45.1		0
2191.9	37.2921	48.1437	35.5655		55.4	45.1		0
2195.05	37.3072	48.1576	35.5875		55.4	45.1		0
2198.2	37.3204	48.1694	35.6069		55.4	45.1		0
2201.35	37.3341	48.1796	35.6194		55.4	45.1		0
2204.5	37.348	48.189	35.6375		55.4	45.1		0
2207.65	37.3596	48.1972	35.6607		55.4	45.1		0
2210.8	37.3663	48.2083	35.6794		55.4	45.1		0
2213.95	37.374	48.2246	35.6947		55.4	45.1		0
2217.1	37.3858	48.2391	35.7127		55.4	45.1		0
2220.25	37.3939	48.2484	35.7327		55.5	45.1		0
2223.4	37.4036	48.2559	35.7473		55.5	45.1		0
2226.55	37.4136	48.2641	35.7609		55.5	45.1		0
2229.7	37.4181	48.2696	35.771		55.5	45.1		0
2232.85	37.4207	48.2728	35.7738		55.5	45.1		0
2236	37.4238	48.2778	35.7772		55.5	45.1		0
2239.15	37.4276	48.2868	35.7848		55.5	45.1		0
2242.3	37.4331	48.2994	35.7907		55.5	45.1		0
2245.45	37.4372	48.3204	35.7965		55.5	45.1		0
2248.6	37.4479	48.3469	35.8063		55.5	45.1		0
2251.75	37.465	48.3659	35.8232		55.5	45.1		0
2254.9	37.476	48.3797	35.8356		55.5	45.1		0
2258.05	37.4878	48.3988	35.843		55.5	45.1		0
2261.2	37.5019	48.4156	35.8591		55.5	45.1		0
2264.35	37.5139	48.4313	35.8775		55.5	45.1		0
2267.5	37.5233	48.4402	35.8941		55.5	45.1		0
2270.65	37.5351	48.4541	35.917		55.5	45.1		0
2273.8	37.5526	48.4711	35.9411		55.5	45.1		0
2276.95	37.5682	48.4837	35.9585		55.5	45.1		0
2280.1	37.5795	48.4964	35.9769		55.5	45.1		0
2283.25	37.5902	48.5094	35.9958		55.5	45.1		0
2286.4	37.6014	48.5232	36.0116		55.5	45.2		0
2289.55	37.609	48.54	36.0239		55.5	45.2		0
2292.7	37.6185	48.5613	36.0392		55.5	45.2		0
2295.85	37.6345	48.5813	36.0566		55.5	45.2		0
2299	37.6478	48.5956	36.0685		55.6	45.2		0
2302.15	37.6599	48.6086	36.0793		55.6	45.2		0
2305.3	37.6725	48.6257	36.0935		55.6	45.2		0
2308.45	37.6859	48.641	36.1089		55.6	45.2		0
2311.6	37.6998	48.6501	36.126		55.6	45.2		0
2314.75	37.7072	48.661	36.1439		55.6	45.2		0
2317.9	37.7148	48.6729	36.165		55.6	45.2		0
2321.05	37.7271	48.6805	36.1787		55.6	45.2		0
2324.2	37.7373	48.6866	36.1844		55.6	45.2		0
2327.35	37.7481	48.6937	36.1944		55.6	45.2		0
2330.5	37.762	48.6975	36.2099		55.6	45.2		0
2333.65	37.7764	48.6986	36.2253		55.6	45.2		0
2336.8	37.7903	48.7054	36.2412		55.6	45.2		0
2339.95	37.8053	48.7154	36.2625		55.7	45.2		0
2343.1	37.8265	48.7233	36.28		55.7	45.2		0
2346.25	37.8472	48.728	36.2914		55.7	45.2		0
2349.4	37.8611	48.7295	36.3068		55.7	45.2		0
2352.55	37.8765	48.7283	36.319		55.7	45.2		0
2355.7	37.8924	48.7286	36.3282		55.7	45.2		0
2358.85	37.8997	48.7289	36.338		55.7	45.2		0
2362	37.9012	48.7424	36.3564		55.7	45.2		0
2365.15	37.9057	48.7555	36.3769		55.7	45.2		0
2368.3	37.9127	48.7713	36.3918		55.7	45.2		0
2371.45	37.9214	48.7995	36.3993		55.7	45.2		0
2374.6	37.9322	48.8242	36.4118		55.7	45.2		0
2377.75	37.9461	48.8419	36.4242		55.7	45.2		0
2380.9	37.9583	48.8532	36.4408		55.7	45.2		0
2384.05	37.964	48.868	36.4604		55.7	45.2		0
2387.2	37.9725	48.8842	36.4741		55.7	45.3		0
2390.35	37.9855	48.9038	36.4827		55.7	45.3		0
2393.5	38.002	48.9299	36.4951		55.7	45.3		0
2396.65	38.0185	48.9544	36.5148		55.7	45.3		0
2399.8	38.0352	48.9688	36.5368		55.7	45.3		0
2402.95	38.0559	48.9791	36.5509		55.7	45.3		0
2406.1	38.0771	48.9899	36.5689		55.7	45.3		0
2409.25	38.0919	48.9961	36.5909		55.7	45.3		0
2412.4	38.1036	48.995	36.6143		55.7	45.3		0
2415.55	38.1143	48.9933	36.6371		55.7	45.3		0
2418.7	38.1223	48.9966	36.6555		55.7	45.3		0
2421.85	38.1299	48.9991	36.6666		55.7	45.3		0
2425	38.1394	49.0061	36.6751		55.8	45.3		0
2428.15	38.1517	49.021	36.6894		55.8	45.3		0
2431.3	38.1608	49.0341	36.7084		55.8	45.3		0
2434.45	38.1633	49.047	36.7199		55.8	45.3		0
2437.6	38.1691	49.0633	36.7324		55.8	45.3		0
2440.75	38.1758	49.08	36.7459		55.8	45.3		0
2443.9	38.1828	49.0909	36.7564		55.8	45.3		0
2447.05	38.1954	49.0962	36.7643		55.8	45.3		0
2450.2	38.2109	49.104	36.7674		55.8	45.3		0
2453.35	38.2275	49.1131	36.7682		55.8	45.3		0
2456.5	38.241	49.121	36.7691		55.8	45.3		0
2459.65	38.2508	49.135	36.7704		55.8	45.3		0
2462.8	38.2641	49.155	36.7804		55.8	45.3		0
2465.95	38.2745	49.1669	36.801		55.8	45.3		0
2469.1	38.2819	49.1756	36.8174		55.8	45.3		0
2472.25	38.2929	49.1872	36.8367		55.8	45.3		0
2475.4	38.304	49.201	36.8573		55.8	45.3		0
2478.55	38.3145	49.2071	36.8718		55.8	45.3		0
2481.7	38.3281	49.216	36.8795		55.8	45.3		0
2484.85	38.3434	49.2294	36.8893		55.8	45.3		0
2488	38.3559	49.2425	36.9023		55.8	45.3		0
2491.15	38.364	49.2599	36.9161		55.9	45.3		0
2494.3	38.372	49.2762	36.9333		55.9	45.3		0
2497.45	38.3866	49.2893	36.9577		55.9	45.3		0
2500.6	38.3992	49.2946	36.98		55.9	45.3		0
2503.75	38.405	49.3016	36.9967		55.9	45.3		0
2506.9	38.4109	49.3113	37.0152		55.9	45.3		0
2510.05	38.4195	49.318	37.0367		55.9	45.3		0
2513.2	38.431	49.3214	37.0539		55.9	45.3		0
2516.35	38.4403	49.3284	37.0661		55.9	45.3		0
2519.5	38.4475	49.3377	37.0787		55.9	45.4		0
2522.65	38.4571	49.3469	37.0951		55.9	45.4		0
2525.8	38.466	49.3582	37.1047		55.9	45.4		0
2528.95	38.4785	49.3733	37.1109		55.9	45.4		0
2532.1	38.4968	49.3896	37.1172		55.9	45.4		0
2535.25	38.5126	49.4041	37.118		55.9	45.4		0
2538.4	38.5263	49.4199	37.1157		55.9	45.4		0
2541.55	38.5425	49.4405	37.1186		55.9	45.4		0
2544.7	38.5621	49.4511	37.13		55.9	45.4		0
2547.85	38.58	49.4615	37.1405		55.9	45.4		0
2551	38.5941	49.4742	37.1532		55.9	45.4		0
2554.15	38.6068	49.4916	37.1724		55.9	45.4		0
2557.3	38.6184	49.5072	37.1873		55.9	45.4		0
2560.45	38.6263	49.5247	37.2032		55.9	45.4		0
2563.6	38.6332	49.5405	37.2189		55.9	45.4		0
2566.75	38.6447	49.5601	37.2304		55.9	45.4		0
2569.9	38.6574	49.5671	37.2403		55.9	45.4		0
2573.05	38.666	49.5767	37.2529		56	45.4		0
2576.2	38.6727	49.5791	37.2665		56	45.4		0
2579.35	38.6794	49.582	37.2772		56	45.4		0
2582.5	38.6871	49.5882	37.2837		56	45.4		0
2585.65	38.6953	49.6016	37.2914		56	45.4		0
2588.8	38.701	49.6243	37.302		56	45.4		0
2591.95	38.709	49.6484	37.3114		56	45.4		0
2595.1	38.7156	49.6712	37.3224		56	45.4		0
2598.25	38.7198	49.6918	37.3354		56	45.4		0
2601.4	38.7323	49.706	37.3471		56	45.4		0
2604.55	38.7441	49.7147	37.3588		56	45.4		0
2607.7	38.7488	49.7179	37.3696		56	45.4		0
2610.85	38.7547	49.7112	37.3788		56	45.4		0
2614	38.763	49.7045	37.3859		56	45.4		0
2617.15	38.777	49.7023	37.395		56	45.4		0
2620.3	38.7882	49.7054	37.4127		56	45.4		0
2623.45	38.7918	49.7155	37.4298		56	45.4		0
2626.6	38.8042	49.7265	37.4423		56	45.4		0
2629.75	38.8148	49.7456	37.457		56	45.4		0
2632.9	38.8257	49.7657	37.4765		56	45.4		0
2636.05	38.8409	49.7831	37.4959		56	45.4		0
2639.2	38.8493	49.8034	37.5079		56	45.4		0
2642.35	38.8585	49.8182	37.5175		56	45.4		0
2645.5	38.8678	49.8282	37.5308		56	45.4		0
2648.65	38.8794	49.8386	37.5417		56	45.4		0
2651.8	38.8949	49.8545	37.5548		56	45.4		0
2654.95	38.9057	49.8726	37.5692		56	45.4		0
2658.1	38.9148	49.8914	37.5793		56	45.4		0
2661.25	38.9252	49.903	37.5862		56	45.4		0
2664.4	38.933	49.9189	37.5955		56	45.4		0
2667.55	38.9385	49.9287	37.617		56	45.4		0
2670.7	38.9483	49.934	37.6318		56	45.4		0
2673.85	38.9647	49.9406	37.6438		56	45.4		0
2677	38.9834	49.9443	37.6604		56	45.4		0
2680.15	38.9974	49.9471	37.6746		56	45.4		0
2683.3	39.012	49.9523	37.689		56	45.4		0
2686.45	39.032	49.9615	37.7084		56	45.4		0
2689.6	39.0492	49.9746	37.7283		56	45.4		0
2692.75	39.0575	49.9855	37.7447		56	45.4		0
2695.9	39.0676	49.9967	37.7584		56.1	45.4		0
2699.05	39.0749	50.0079	37.7746		56.1	45.4		0
2702.2	39.0822	50.0152	37.7862		56.1	45.4		0
2705.35	39.0955	50.0209	37.7877		56.1	45.4		0
2708.5	39.1098	50.0254	37.7904		56.1	45.4		0
2711.65	39.1235	50.0292	37.796		56.1	45.4		0
2714.8	39.1316	50.0318	37.807		56.1	45.4		0
2717.95	39.1352	50.0384	37.8226		56.1	45.4		0
2721.1	39.1453	50.0527	37.8384		56.1	45.4		0
2724.25	39.1543	50.0698	37.8583		56.1	45.4		0
2727.4	39.1544	50.0864	37.8742		56.1	45.4		0
2730.55	39.1521	50.1028	37.8877		56.1	45.4		0
2733.7	39.1538	50.1167	37.9004		56.1	45.4		0
2736.85	39.1553	50.1213	37.9048		56.1	45.4		0
2740	39.1623	50.1243	37.9064		56.1	45.4		0
2743.15	39.1732	50.1263	37.9143		56.1	45.4		0
2746.3	39.1849	50.129	37.9287		56.1	45.4		0
2749.45	39.1982	50.1312	37.9434		56.1	45.4		0
2752.6	39.2103	50.1402	37.9564		56.1	45.4		0
2755.75	39.2269	50.1574	37.9667		56.1	45.4		0
2758.9	39.2431	50.1721	37.9729		56.1	45.4		0
2762.05	39.2487	50.187	37.9778		56.1	45.4		0
2765.2	39.2503	50.1984	37.9854		56.1	45.4		0
2768.35	39.254	50.2075	37.9906		56.1	45.4		0
2771.5	39.2628	50.2121	37.993		56.1	45.4		0
2774.65	39.2791	50.2098	37.9966		56.1	45.4		0
2777.8	39.2886	50.2107	38.0067		56.2	45.4		0
2780.95	39.2962	50.2126	38.0202		56.2	45.4		0
2784.1	39.2991	50.2162	38.0298		56.2	45.4		0
2787.25	39.2999	50.2297	38.0376		56.2	45.4		0
2790.4	39.3065	50.2464	38.0502		56.2	45.4		0
2793.55	39.3166	50.2624	38.0641		56.2	45.4		0
2796.7	39.3267	50.2791	38.0763		56.2	45.5		0
2799.85	39.3408	50.293	38.0897		56.2	45.5		0
2803	39.3582	50.3047	38.0982		56.2	45.5		0
2806.15	39.3779	50.3095	38.1004		56.2	45.5		0
2809.3	39.3986	50.3132	38.1064		56.2	45.5		0
2812.45	39.4151	50.3198	38.117		56.2	45.5		0
2815.6	39.4273	50.3244	38.1278		56.2	45.5		0
2818.75	39.4317	50.3307	38.1382		56.2	45.5		0
2821.9	39.4331	50.3402	38.152		56.2	45.4		0
2825.05	39.4387	50.3451	38.1683		56.2	45.4		0
2828.2	39.4498	50.3518	38.1804		56.2	45.5		0
2831.35	39.46	50.3593	38.1908		56.2	45.5		0
2834.5	39.4658	50.3708	38.1972		56.2	45.5		0
2837.65	39.4684	50.3832	38.2012		56.2	45.5		0
2840.8	39.4786	50.397	38.2042		56.2	45.5		0
2843.95	39.4903	50.4144	38.2143		56.2	45.5		0
2847.1	39.4989	50.4333	38.2319		56.2	45.5		0
2850.25	39.5059	50.4401	38.2462		56.2	45.5		0
2853.4	39.5072	50.4463	38.2577		56.2	45.5		0
2856.55	39.5065	50.4475	38.272		56.2	45.5		0
2859.7	39.5121	50.4497	38.2881		56.2	45.5		0
2862.85	39.5219	50.4512	38.2973		56.2	45.5		0
2866	39.53	50.4594	38.3099		56.2	45.5		0
2869.15	39.5345	50.4706	38.327		56.2	45.5		0
2872.3	39.5431	50.4807	38.3469		56.2	45.5		0
2875.45	39.562	50.4938	38.3672		56.2	45.5		0
2878.6	39.5756	50.5071	38.389		56.2	45.5		0
2881.75	39.5864	50.515	38.4103		56.2	45.5		0
2884.9	39.5979	50.5207	38.4248		56.2	45.5		0
2888.05	39.6053	50.5268	38.4348		56.2	45.5		0
2891.2	39.6102	50.5319	38.4459		56.3	45.5		0
2894.35	39.6187	50.5352	38.4541		56.3	45.5		0
2897.5	39.6275	50.5382	38.4637		56.3	45.5		0
2900.65	39.632	50.5449	38.4751		56.3	45.5		0
2903.8	39.627	50.5502	38.4868		56.3	45.5		0
2906.95	39.6256	50.5558	38.4952		56.3	45.5		0
2910.1	39.6328	50.5647	38.5023		56.3	45.5		0
2913.25	39.642	50.5735	38.513		56.3	45.5		0
2916.4	39.649	50.5814	38.5192		56.3	45.5		0
2919.55	39.6628	50.5907	38.5221		56.3	45.5		0
2922.7	39.6773	50.6015	38.5299		56.3	45.5		0
2925.85	39.6898	50.6094	38.5405		56.3	45.5		0
2929	39.7041	50.6094	38.5506		56.3	45.5		0
2932.15	39.7175	50.6104	38.5622		56.3	45.5		0
2935.3	39.7266	50.6143	38.5813		56.3	45.5		0
2938.45	39.7289	50.6153	38.6027		56.3	45.5		0
2941.6	39.7327	50.6187	38.62		56.3	45.5		0
2944.75	39.7439	50.627	38.6339		56.3	45.5		0
2947.9	39.7544	50.6365	38.6465		56.3	45.5		0
2951.05	39.7589	50.6499	38.6573		56.3	45.5		0
2954.2	39.7645	50.6597	38.6682		56.3	45.5		0
2957.35	39.7696	50.6721	38.6793		56.3	45.5		0
2960.5	39.7741	50.6797	38.6868		56.3	45.5		0
2963.65	39.7811	50.682	38.6889		56.3	45.6		0
2966.8	39.7923	50.6873	38.6921		56.3	45.6		0
2969.95	39.8061	50.6905	38.7001		56.3	45.5		0
2973.1	39.8169	50.6931	38.7091		56.3	45.5		0
2976.25	39.8273	50.6971	38.7147		56.3	45.5		0
2979.4	39.8407	50.7024	38.7243		56.3	45.5		0
2982.55	39.8516	50.7087	38.7375		56.3	45.5		0
2985.7	39.8557	50.7159	38.7496		56.3	45.5		0
2988.85	39.8584	50.7266	38.7627		56.3	45.5		0
2992	39.8642	50.7408	38.7762		56.3	45.5		0
2995.15	39.8711	50.7498	38.7853		56.3	45.5		0
2998.3	39.8797	50.7571	38.7944		56.3	45.5		0
3001.45	39.8909	50.7628	38.8108		56.3	45.6		0
3004.6	39.907	50.7668	38.8251		56.3	45.6		0
3007.75	39.9188	50.7682	38.8324		56.3	45.6		0
3010.9	39.925	50.7699	38.8422		56.4	45.6		0
3014.05	39.9335	50.7731	38.8573		56.4	45.6		0
3017.2	39.9424	50.7753	38.872		56.4	45.6		0
3020.35	39.9449	50.7857	38.8832		56.4	45.6		0
3023.5	39.9424	50.8024	38.8928		56.3	45.6		0
3026.65	39.9435	50.8144	38.9063		56.3	45.6		0
3029.8	39.9512	50.823	38.9188		56.3	45.6		0
3032.95	39.9634	50.8339	38.935		56.3	45.6		0
3036.1	39.9804	50.848	38.9566		56.3	45.6		0
3039.25	40.0004	50.8592	38.9742		56.3	45.5		0
3042.4	40.0115	50.8661	38.9814		56.3	45.5		0
3045.55	40.0236	50.8692	38.9895		56.4	45.5		0
3048.7	40.0386	50.8744	38.9983		56.4	45.5		0
3051.85	40.0508	50.8764	39.0104		56.4	45.5		0
3055	40.0559	50.8813	39.0184		56.4	45.5		0
3058.15	40.0559	50.8873	39.0285		56.4	45.6		0
3061.3	40.0528	50.8889	39.0418		56.4	45.6		0
3064.45	40.0539	50.8883	39.052		56.4	45.6		0
3067.6	40.0591	50.8903	39.0635		56.4	45.6		0
3070.75	40.0659	50.8993	39.0728		56.4	45.6		0
3073.9	40.0781	50.9108	39.0765		56.4	45.5		0
3077.05	40.0898	50.9192	39.0809		56.4	45.5		0
3080.2	40.0968	50.9287	39.0879		56.4	45.5		0
3083.35	40.1089	50.9357	39.0998		56.4	45.5		0
3086.5	40.1201	50.9432	39.1096		56.4	45.5		0
3089.65	40.1273	50.9522	39.1134		56.4	45.5		0
3092.8	40.1337	50.9575	39.1229		56.4	45.5		0
3095.95	40.1434	50.9597	39.1338		56.4	45.5		0
3099.1	40.1581	50.9609	39.1417		56.4	45.5		0
3102.25	40.1719	50.9647	39.1512		56.4	45.5		0
3105.4	40.185	50.9739	39.1586		56.4	45.5		0
3108.55	40.1986	50.9809	39.1674		56.4	45.5		0
3111.7	40.206	50.9904	39.1789		56.4	45.6		0
3114.85	40.2065	51.0024	39.1935		56.4	45.6		0
3118	40.2069	51.0145	39.2051		56.4	45.6		0
3121.15	40.207	51.0276	39.2082		56.4	45.6		0
3124.3	40.2071	51.037	39.2139		56.4	45.6		0
3127.45	40.2038	51.0445	39.228		56.4	45.6		0
3130.6	40.2017	51.0463	39.2438		56.4	45.6		0
3133.75	40.2067	51.046	39.2538		56.4	45.6		0
3136.9	40.2155	51.0517	39.2592		56.4	45.6		0
3140.05	40.2246	51.053	39.2677		56.4	45.6		0
3143.2	40.2308	51.0526	39.2769		56.4	45.6		0
3146.35	40.2366	51.0573	39.2945		56.4	45.6		0
3149.5	40.2444	51.0659	39.3101		56.4	45.6		0
3152.65	40.2552	51.0731	39.3187		56.4	45.6		0
3155.8	40.2706	51.0844	39.326		56.4	45.6		0
3158.95	40.2872	51.0935	39.3377		56.4	45.6		0
3162.1	40.2946	51.1024	39.3494		56.4	45.6		0
3165.25	40.3024	51.1057	39.3585		56.4	45.6		0
3168.4	40.3145	51.1106	39.3676		56.4	45.6		0
3171.55	40.3277	51.115	39.3805		56.5	45.6		0
3174.7	40.3352	51.1136	39.3953		56.5	45.6		0
3177.85	40.3363	51.1126	39.4108		56.5	45.5		0
3181	40.3336	51.1171	39.4282		56.5	45.5		0
3184.15	40.336	51.1249	39.444		56.5	45.5		0
3187.3	40.3383	51.1337	39.4509		56.4	45.5		0
3190.45	40.3439	51.1448	39.4525		56.4	45.5		0
3193.6	40.3565	51.1564	39.454		56.4	45.6		0
3196.75	40.3664	51.1646	39.4553		56.4	45.6		0
3199.9	40.3795	51.1703	39.4543		56.4	45.6		0
3203.05	40.3993	51.1771	39.4563		56.4	45.6		0
3206.2	40.4194	51.1789	39.4687		56.4	45.6		0
3209.35	40.437	51.1764	39.4823		56.5	45.6		0
3212.5	40.4487	51.1754	39.4949		56.5	45.6		0
3215.65	40.46	51.1775	39.5085		56.5	45.6		0
3218.8	40.4703	51.1863	39.5193		56.5	45.6		0
3221.95	40.4782	51.1875	39.5321		56.5	45.6		0
3225.1	40.4847	51.1974	39.5476		56.5	45.6		0
3228.25	40.4933	51.2106	39.562		56.5	45.5		0
3231.4	40.501	51.2197	39.5741		56.5	45.5		0
3234.55	40.5081	51.2293	39.5737		56.5	45.5		0
3237.7	40.5173	51.2367	39.5783		56.5	45.5		0
3240.85	40.5278	51.233	39.5868		56.5	45.5		0
3244	40.5355	51.2249	39.592		56.5	45.5		0
3247.15	40.5402	51.2217	39.5963		56.5	45.5		0
3250.3	40.5461	51.2259	39.6072		56.5	45.5		0
3253.45	40.5552	51.2254	39.6176		56.5	45.5		0
3256.6	40.5645	51.2261	39.6253		56.5	45.5		0
3259.75	40.5729	51.2379	39.6317		56.5	45.5		0
3262.9	40.5831	51.2475	39.6323		56.5	45.5		0
3266.05	40.5883	51.2599	39.6324		56.5	45.5		0
3269.2	40.5858	51.2709	39.6337		56.5	45.5		0
3272.35	40.5861	51.2757	39.6443		56.5	45.5		0
3275.5	40.5896	51.2793	39.6593		56.5	45.5		0
3278.65	40.5944	51.283	39.6706		56.5	45.5		0
3281.8	40.5958	51.2893	39.6838		56.5	45.5		0
3284.95	40.5995	51.2956	39.7004		56.5	45.5		0
3288.1	40.6098	51.2973	39.7165		56.5	45.5		0
3291.25	40.6192	51.3006	39.7286		56.5	45.6		0
3294.4	40.6281	51.3029	39.7387		56.5	45.6		0
3297.55	40.6394	51.3057	39.75		56.5	45.6		0
3300.7	40.6487	51.3124	39.7616		56.5	45.6		0
3303.85	40.6582	51.3146	39.7786		56.5	45.6		0
3307	40.6679	51.3179	39.7985		56.5	45.6		0
3310.15	40.6783	51.3229	39.816		56.5	45.6		0
3313.3	40.6855	51.3272	39.8291		56.5	45.6		0
3316.45	40.6838	51.3326	39.8383		56.5	45.6		0
3319.6	40.6858	51.3355	39.8473		56.5	45.6		0
3322.75	40.6917	51.3345	39.8511		56.5	45.6		0
3325.9	40.6944	51.3354	39.8479		56.5	45.6		0
3329.05	40.6917	51.335	39.8537		56.5	45.6		0
3332.2	40.6876	51.3362	39.8594		56.5	45.6		0
3335.35	40.6841	51.3393	39.8618		56.5	45.6		0
3338.5	40.6821	51.3392	39.8675		56.5	45.5		0
3341.65	40.6811	51.3405	39.8709		56.5	45.5		0
3344.8	40.6839	51.3416	39.8712		56.5	45.5		0
3347.95	40.6911	51.3457	39.8722		56.5	45.5		0
3351.1	40.6949	51.35	39.8772		56.5	45.6		0
3354.25	40.6996	51.3478	39.8805		56.5	45.6		0
3357.4	40.7088	51.3469	39.8821		56.5	45.6		0
3360.55	40.7157	51.3487	39.8859		56.5	45.6		0
3363.7	40.7191	51.3495	39.8967		56.5	45.6		0
3366.85	40.7216	51.3526	39.9047		56.5	45.6		0
3370	40.7249	51.3554	39.911		56.5	45.6		0
3373.15	40.7302	51.36	39.9227		56.5	45.6		0
3376.3	40.7335	51.3675	39.9341		56.5	45.6		0
3379.45	40.7426	51.3807	39.9425		56.5	45.6		0
3382.6	40.7535	51.3978	39.951		56.5	45.6		0
3385.75	40.7595	51.407	39.9597		56.5	45.6		0
3388.9	40.7664	51.4106	39.9636		56.5	45.6		0
3392.05	40.7784	51.4154	39.9636		56.5	45.6		0
3395.2	40.7893	51.422	39.9672		56.5	45.6		0
3398.35	40.7971	51.4271	39.9777		56.6	45.6		0
3401.5	40.8027	51.4248	39.9866		56.6	45.6		0
3404.65	40.8076	51.4246	39.9933		56.6	45.6		0
3407.8	40.8151	51.4262	40.0032		56.6	45.6		0
3410.95	40.8224	51.4247	40.0133		56.6	45.6		0
3414.1	40.8313	51.4324	40.0153		56.6	45.6		0
3417.25	40.8431	51.4388	40.0221		56.6	45.6		0
3420.4	40.8513	51.4398	40.0331		56.6	45.6		0
3423.55	40.8589	51.4492	40.0286		56.6	45.6		0
3426.7	40.8671	51.4564	40.0253		56.6	45.6		0
3429.85	40.8776	51.4636	40.027		56.6	45.6		0
3433	40.884	51.4707	40.0199		56.6	45.6		0
3436.15	40.8822	51.4663	40.0073		56.6	45.5		0
3439.3	40.8815	51.4673	39.9921		56.6	45.5		0
3442.45	40.8852	51.4684	39.9817		56.6	45.5		0
3445.6	40.8887	51.4639	39.9766		56.6	45.5		0
3448.75	40.8948	51.4637	39.9757		56.6	45.5		0
3451.9	40.9027	51.4616	39.985		56.6	45.5		0
3455.05	40.9065	51.4585	39.9932		56.6	45.5		0
3458.2	40.9151	51.4601	40.0029		56.6	45.5		0
3461.35	40.9254	51.4656	40.0187		56.6	45.5		0
3464.5	40.9358	51.4759	40.035		56.6	45.6		0
3467.65	40.9444	51.4816	40.0464		56.6	45.6		0
3470.8	40.9457	51.4909	40.0501		56.6	45.6		0
3473.95	40.9464	51.5022	40.0498		56.6	45.6		0
3477.1	40.9513	51.5063	40.0503		56.6	45.6		0
3480.25	40.9543	51.5081	40.0497		56.6	45.6		0
3483.4	40.9556	51.5099	40.05		56.6	45.6		0
3486.55	40.9586	51.5188	40.0544		56.6	45.6		0
3489.7	40.9626	51.5249	40.0616		56.6	45.6		0
3492.85	40.9669	51.5307	40.0707		56.6	45.6		0
3496	40.9715	51.542	40.08		56.6	45.6		0
3499.15	40.9805	51.542	40.09		56.6	45.6		0
3502.3	40.9883	51.541	40.0921		56.6	45.6		0
3505.45	40.9882	51.5458	40.0905		56.6	45.6		0
3508.6	40.9912	51.544	40.0946		56.6	45.6		0
3511.75	41.0009	51.5415	40.0952		56.6	45.6		0
3514.9	41.0108	51.5385	40.0956		56.6	45.6		0
3518.05	41.0178	51.5386	40.1002		56.6	45.6		0
3521.2	41.0228	51.5459	40.1034		56.6	45.6		0
3524.35	41.0262	51.55	40.1023		56.6	45.6		0
3527.5	41.0326	51.5583	40.099		56.6	45.6		0
3530.65	41.0382	51.5692	40.0948		56.6	45.6		0
3533.8	41.0476	51.572	40.0977		56.6	45.6		0
3536.95	41.0571	51.576	40.0963		56.6	45.6		0
3540.1	41.0587	51.5781	40.098		56.6	45.6		0
3543.25	41.0614	51.5784	40.1031		56.6	45.6		0
3546.4	41.0658	51.5782	40.1027		56.6	45.6		0
3549.55	41.0685	51.5769	40.0988		56.6	45.6		0
3552.7	41.0694	51.5826	40.0983		56.6	45.6		0
3555.85	41.0669	51.5912	40.1016		56.6	45.6		0
3559	41.0686	51.5916	40.1073		56.6	45.6		0
3562.15	41.068	51.5934	40.1097		56.6	45.6		0
3565.3	41.0685	51.5974	40.1206		56.6	45.6		0
3568.45	41.0756	51.6026	40.1303		56.6	45.6		0
3571.6	41.0863	51.6104	40.1336		56.6	45.6		0
3574.75	41.0947	51.6185	40.1354		56.6	45.6		0
3577.9	41.1058	51.6287	40.1313		56.6	45.6		0
3581.05	41.1153	51.6394	40.121		56.6	45.6		0
3584.2	41.1239	51.6576	40.1093		56.6	45.6		0
3587.35	41.1282	51.6815	40.1064		56.6	45.6		0
3590.5	41.1281	51.6897	40.1041		56.6	45.6		0
3593.65	41.1288	51.6958	40.0963		56.6	45.6		0
3596.8	41.1306	51.7064	40.0912		56.6	45.6		0
3599.95	41.1344	51.7153	40.0923		56.6	45.6		0
3603.1	41.1411	51.7282	40.0944		56.6	45.6		0
3606.25	41.1478	51.7457	40.0998		56.6	45.6		0
3609.4	41.1537	51.7594	40.1091		56.6	45.6		0
3612.55	41.1568	51.7668	40.1119		56.6	45.6
3615.7	41.1569	51.7684	40.1127		56.6	45.6
3618.85	41.1582	51.7701	40.1109		56.6	45.6
3622	41.1575	51.7575	40.1119		56.6	45.6
3625.15	41.1561	51.7366	40.105		56.6	45.6
3628.3	41.158	51.7217	40.0942		56.6	45.6
3631.45	41.1641	51.7116	40.0847		56.6	45.6
3634.6	41.1735	51.7114	40.0817		56.6	45.7
3637.75	41.1875	51.7131	40.0766		56.6	45.7
3640.9	41.2019	51.7149	40.0715		56.6	45.7
3644.05	41.2116	51.7199	40.0652		56.7	45.7
3647.2	41.2173	51.7185	40.0537		56.7	45.7
3650.35	41.2231	51.715	40.0392		56.6	45.7
3653.5	41.2313	51.713	40.0302		56.6	45.6
3656.65	41.235	51.7122	40.0243		56.6	45.6
3659.8	41.2317	51.7173	40.0159		56.6	45.6
3662.95	41.233	51.7278	40.0085		56.6	45.6
3666.1	41.2406	51.742	40.0034		56.6	45.6
3669.25	41.2475	51.7529	39.9989		56.6	45.6
3672.4	41.2517	51.7531	39.9875		56.6	45.6
3675.55	41.2545	51.7539	39.9743		56.7	45.6
3678.7	41.2556	51.7541	39.9667		56.7	45.6
3681.85	41.2597	51.7494	39.9607		56.7	45.6
3685	41.2647	51.7518	39.9615		56.7	45.6
3688.15	41.2703	51.7552	39.9661		56.7	45.6
3691.3	41.2723	51.762	39.97		56.7	45.6
3694.45	41.2674	51.7651	39.9678		56.7	45.6
3697.6	41.2664	51.7661	39.9654		56.7	45.6
3700.75	41.2711	51.7674	39.9598		56.7	45.6
3703.9	41.2757	51.7622	39.9507		56.7	45.6
3707.05	41.2836	51.7559	39.9334		56.7	45.6
3710.2	41.2947	51.7601	39.92		56.7	45.6
3713.35	41.3067	51.762	39.9135		56.7	45.6
3716.5	41.3146	51.7674	39.9002		56.7	45.6
3719.65	41.3153	51.7781	39.8906		56.7	45.6
3722.8	41.3192	51.785	39.8807		56.7	45.6
3725.95	41.321	51.7913	39.8663		56.7	45.6
3729.1	41.3179	51.7951	39.8528		56.7	45.6
3732.25	41.3155	51.803	39.8397		56.7	45.6
3735.4	41.3172	51.8087	39.8248		56.7	45.6
3738.55	41.3208	51.8069	39.8009		56.7	45.6
3741.7	41.326	51.8092	39.7757		56.7	45.6
3744.85	41.3295	51.8143	39.7541		56.7	45.6
3748	41.3309	51.82	39.7386		56.7	45.6
3751.15	41.3296	51.8272	39.7252		56.7	45.6
3754.3	41.329	51.8333	39.7196		56.7	45.5
3757.45	41.3341	51.8401	39.7195		56.7	45.5
3760.6	41.3406	51.8432	39.7202		56.7	45.5
3763.75	41.3432	51.8457	39.7246		56.7	45.5
3766.9	41.3457	51.8479	39.7317		56.7	45.5
3770.05	41.3511	51.8452	39.7356		56.7	45.5
3773.2	41.3553	51.8425	39.7311		56.7	45.5
3776.35	41.3565	51.8457	39.724		56.6	45.5
3779.5	41.3563	51.8538	39.7235		56.6	45.5
3782.65	41.3549	51.8652	39.7216		56.6	45.5
3785.8	41.3533	51.8709	39.7156		56.6	45.5
3788.95	41.3522	51.8794	39.7149		56.6	45.5
3792.1	41.3496	51.8844	39.7134		56.6	45.5
3795.25	41.3462	51.8822	39.7117		56.6	45.5
3798.4	41.342	51.8813	39.7106		56.7	45.5
3801.55	41.34	51.8748	39.7106		56.7	45.5
3804.7	41.3433	51.8669	39.703		56.7	45.5
3807.85	41.349	51.8651	39.6913		56.7	45.5
3811	41.3535	51.8726	39.6864		56.7	45.5
3814.15	41.3561	51.8827	39.6832		56.7	45.5
3817.3	41.3607	51.8914	39.6769		56.7	45.5
3820.45	41.3686	51.8983	39.6734		56.7	45.5
3823.6	41.3771	51.9062	39.6736		56.7	45.5
3826.75	41.3843	51.9107	39.6737		56.7	45.5
3829.9	41.3913	51.9128	39.672		56.7	45.5
3833.05	41.3957	51.9133	39.6712		56.7	45.5
3836.2	41.3976	51.9066	39.6713		56.7	45.5
3839.35	41.398	51.9013	39.6684		56.7	45.5
3842.5	41.3978	51.9001	39.6679		56.7	45.5
3845.65	41.395	51.9039	39.6742		56.7	45.5
3848.8	41.3886	51.9102	39.6837		56.7	45.5
3851.95	41.3831	51.9169	39.6913		56.7	45.5
3855.1	41.3837	51.9263	39.6983		56.7	45.5
3858.25	41.3874	51.9341	39.705		56.7	45.5
3861.4	41.3914	51.9376	39.7053		56.7	45.5
3864.55	41.3944	51.9382	39.7003		56.7	45.5
3867.7	41.3949	51.9342	39.7		56.7	45.5
3870.85	41.3918	51.9291	39.6997		56.7	45.5
3874	41.3866	51.9274	39.6978		56.7	45.5
3877.15	41.3845	51.9314	39.7049		56.7	45.5
3880.3	41.3831	51.9408	39.7159		56.7	45.5
3883.45	41.3775	51.9483	39.721		56.7	45.4
3886.6	41.375	51.9534	39.7259		56.7	45.4
3889.75	41.377	51.9606	39.7356		56.7	45.4
3892.9	41.3787	51.9634	39.746		56.7	45.4
3896.05	41.3792	51.9683	39.749		56.7	45.4
3899.2	41.3796	51.9725	39.7506		56.7	45.4
3902.35	41.3784	51.9753	39.7562		56.7	45.4
3905.5	41.3768	51.9798	39.7525		56.7	45.5
3908.65	41.3768	51.9803	39.7529		56.7	45.5
3911.8	41.3828	51.9844	39.7544		56.7	45.5
3914.95	41.3899	51.9873	39.7576		56.7	45.5
3918.1	41.3912	51.9856	39.7602		56.7	45.4
3921.25	41.3908	51.9862	39.7657		56.7	45.4
3924.4	41.3942	51.9865	39.7757		56.7	45.4
3927.55	41.3966	51.986	39.7848		56.7	45.4
3930.7	41.3956	51.9893	39.787		56.7	45.4
3933.85	41.3929	51.9896	39.7917		56.7	45.4
3937	41.3865	51.9865	39.7964		56.7	45.4
3940.15	41.3813	51.9828	39.7971		56.6	45.4
3943.3	41.3762	51.9842	39.7949		56.6	45.4
3946.45	41.3744	51.9929	39.7927		56.6	45.4
3949.6	41.3732	51.9988	39.7891		56.6	45.3
3952.75	41.3679	52.0064	39.783		56.6	45.3
3955.9	41.3643	52.0128	39.7806		56.6	45.3
3959.05	41.3679	52.0128	39.7804		56.7	45.3
3962.2	41.3749	52.0112	39.7776		56.7	45.3
3965.35	41.3771	52.0105	39.7771		56.7	45.3
3968.5	41.3771	52.0103	39.7829		56.7	45.3
3971.65	41.3787	52.01	39.789		56.7	45.3
3974.8	41.3806	52.0093	39.7891		56.7	45.3
3977.95	41.3793	52.0123	39.7883		56.7	45.3
3981.1	41.3798	52.011	39.791		56.7	45.3
3984.25	41.3801	52.007	39.793		56.7	45.3
3987.4	41.3807	52.0048	39.796		56.7	45.2
3990.55	41.3816	51.9956	39.8063		56.7	45.2
3993.7	41.3836	51.9818	39.8144		56.7	45.2
3996.85	41.3881	51.9678	39.8204		56.7	45.2
4000	41.3889	51.9543	39.8269		56.7	45.2
4003.15	41.3852	51.9509	39.8335		56.7	45.2
4006.3	41.3854	51.9428	39.8351		56.7	45.3
4009.45	41.3838	51.9364	39.8282		56.7	45.3
4012.6	41.3784	51.9395	39.8274		56.7	45.3
4015.75	41.373	51.9421	39.8289		56.7	45.3
4018.9	41.3655	51.9478	39.8263		56.6	45.3
4022.05	41.3596	51.9596	39.8222		56.7	45.3
4025.2	41.3531	51.9666	39.8198		56.7	45.3
4028.35	41.3494	51.9684	39.8135		56.7	45.4
4031.5	41.352	51.9708	39.8005		56.7	45.4
4034.65	41.3532	51.9772	39.7881		56.7	45.4
4037.8	41.3516	51.9785	39.7793		56.7	45.4
4040.95	41.3543	51.9744	39.7705		56.6	45.4
4044.1	41.3598	51.9756	39.7647		56.6	45.4
4047.25	41.3627	51.9782	39.7677		56.6	45.4
4050.4	41.36	51.9798	39.7721		56.5	45.4
4053.55	41.358	51.981	39.774		56.5	45.4
4056.7	41.3571	51.9793	39.7752		56.5	45.4
4059.85	41.3554	51.972	39.7734		56.5	45.3
4063	41.3524	51.9602	39.7707		56.5	45.3
4066.15	41.3498	51.9544	39.7704		56.5	45.3
4069.3	41.3419	51.9539	39.7733		56.5	45.3
4072.45	41.3304	51.9483	39.7758		56.5	45.3
4075.6	41.3226	51.945	39.7739		56.5	45.3
4078.75	41.3191	51.9438	39.774		56.5	45.3
4081.9	41.3145	51.9454	39.7803		56.6	45.3
4085.05	41.3102	51.9459	39.7827		56.6	45.3
4088.2	41.3093	51.9425	39.7819		56.6	45.2
4091.35	41.3097	51.9404	39.7831		56.6	45.2
4094.5	41.3066	51.9358	39.7812		56.6	45.2
4097.65	41.3058	51.9318	39.783		56.6	45.2
4100.8	41.3058	51.9317	39.7817		56.6	45.2
4103.95	41.3032	51.9268	39.7798		56.6	45.2
4107.1	41.2965	51.9185	39.7771		56.6	45.2
4110.25	41.2915	51.9143	39.7748		56.6	45.2
4113.4	41.2899	51.9108	39.7794		56.6	45.2
4116.55	41.2907	51.9083	39.785		56.6	45.2
4119.7	41.2913	51.9023	39.7864		56.6	45.1
4122.85	41.2907	51.8961	39.7854		56.6	45.1
4126	41.292	51.8937	39.7876		56.6	45.1
4129.15	41.2913	51.8844	39.7946		56.6	45.1
4132.3	41.2908	51.8799	39.8011		56.6	45.1
4135.45	41.2912	51.877	39.8068		56.5	45.1
4138.6	41.2875	51.8718	39.8153		56.6	45.2
4141.75	41.2777	51.8692	39.82		56.6	45.2
4144.9	41.2663	51.8669	39.8229		56.6	45.2
4148.05	41.2588	51.8682	39.8261		56.6	45.2
4151.2	41.253	51.8648	39.8279		56.6	45.1
4154.35	41.2457	51.8561	39.8291		56.6	45.1
4157.5	41.239	51.8551	39.8332		56.6	45.1
4160.65	41.2365	51.8568	39.8438		56.6	45.1
4163.8	41.2343	51.8576	39.8515		56.5	45.1
4166.95	41.2344	51.8627	39.8551		56.5	45.1
4170.1	41.2372	51.8619	39.8582		56.5	45.1
4173.25	41.2377	51.8628	39.8585		56.5	45.1
4176.4	41.2337	51.8583	39.853		56.5	45.1
4179.55	41.231	51.8502	39.8496		56.5	45.1
4182.7	41.2309	51.8435	39.847		56.5	45.1
4185.85	41.2316	51.8317	39.8465		56.5	45
4189	41.232	51.8238	39.8439		56.6	45
4192.15	41.2316	51.822	39.8436		56.6	45
4195.3	41.2345	51.8187	39.8472		56.6	45
4198.45	41.2401	51.8154	39.8447		56.6	45
4201.6	41.2417	51.8058	39.8435		56.6	45
4204.75	41.2428	51.8	39.8425		56.6	45
4207.9	41.2425	51.7963	39.8416		56.6	45
4211.05	41.2362	51.7926	39.8413		56.6	45
4214.2	41.2279	51.7964	39.8391		56.6	45.1
4217.35	41.223	51.7992	39.8425		56.6	45.1
4220.5	41.2189	51.7943	39.8412		56.6	45.2
4223.65	41.2117	51.7928	39.8371		56.6	45.2
4226.8	41.2007	51.789	39.8394		56.6	45.3
4229.95	41.1927	51.7857	39.8474		56.6	45.3
4233.1	41.189	51.7786	39.8537		56.6	45.4
4236.25	41.1877	51.7754	39.8601		56.6	45.4
4239.4	41.1847	51.7796	39.8657		56.6	45.4
4242.55	41.1794	51.7815	39.8696		56.6	45.5
4245.7	41.1709	51.7849	39.8686		56.7	45.5
4248.85	41.1639	51.7849	39.8663		56.7	45.5
4252	41.16	51.7746	39.8637		56.6	45.5
4255.15	41.1588	51.7671	39.8568		56.3	45.5
4258.3	41.1558	51.7641	39.8529		56	45.5
4261.45	41.1511	51.7604	39.8566		55.7	45.5
4264.6	41.1485	51.7503	39.8595		55.4	45.6
4267.75	41.1498	51.7382	39.8603		55.3	45.6
4270.9	41.1507	51.7351	39.8618		55.4	45.5
4274.05	41.1488	51.7336	39.8675		55.8	45.5
4277.2	41.145	51.7297	39.873		56.1	45.4
4280.35	41.1417	51.7296	39.873		56.3	45.4
4283.5	41.1372	51.7273	39.8845		56.5	45.4
4286.65	41.1321	51.7272	39.8937		56.5	45.4
4289.8	41.1286	51.7257	39.8945		56.5	45.3
4292.95	41.1227	51.7263	39.8948		56.5	45.4
4296.1	41.1117	51.7248	39.8962		56.5	45.4
4299.25	41.1041	51.7116	39.892		56.5	45.4
4302.4	41.0993	51.6984	39.8866		56.5	45.4
4305.55	41.0937	51.6907	39.8831		56.6	45.5
4308.7	41.0856	51.6791	39.8861		56.6	45.5
4311.85	41.0776	51.6695	39.8899		56.6	45.5
4315	41.0746	51.6639	39.8989		56.6	45.5
4318.15	41.0723	51.6595	39.9096		56.6	45.5
4321.3	41.0699	51.6537	39.9127		56.5	45.4
4324.45	41.0726	51.6479	39.909		56.5	45.4
4327.6	41.0729	51.6449	39.9114		56.5	45.4
4330.75	41.0692	51.6363	39.9171		56.5	45.3
4333.9	41.0661	51.6271	39.9201		56.5	45.3
4337.05	41.0662	51.6256	39.9218		56.5	45.3
4340.2	41.0652	51.6278	39.9222		56.6	45.3
4343.35	41.0573	51.6283	39.9216		56.6	45.3
4346.5	41.0431	51.6263	39.9195		56.6	45.3
4349.65	41.0265	51.624	39.9249		56.6	45.3
4352.8	41.0057	51.6265	39.9319		56.6	45.3
4355.95	40.9881	51.6252	39.9331		56.6	45.3
4359.1	40.9756	51.6249	39.9343		56.6	45.3
4362.25	40.9631	51.6243	39.937		56.5	45.3
4365.4	40.9522	51.6197	39.9383		56.5	45.3
4368.55	40.9455	51.6194	39.934		56.5	45.3
4371.7	40.9445	51.6219	39.9317		56.5	45.2
4374.85	40.9423	51.6232	39.9294		56.5	45.2
4378	40.9374	51.6208	39.9248		56.5	45.2
4381.15	40.939	51.6141	39.9206		56.5	45.2
4384.3	40.9431	51.6047	39.9238		56.5	45.2
4387.45	40.9476	51.5986	39.9247		56.5	45.1
4390.6	40.9546	51.5863	39.9275		56.5	45.1
4393.75	40.9573	51.5809	39.9271		56.5	45.1
4396.9	40.9533	51.5747	39.9358		56.5	45.1
4400.05	40.9454	51.5698	39.9434		56.5	45.1
4403.2	40.9401	51.5702	39.9482		56.5	45.1
4406.35	40.9355	51.57	39.9507		56.5	45.1
4409.5	40.9263	51.568	39.951		56.5	45
4412.65	40.9229	51.5651	39.9453		56.5	45
4415.8	40.9266	51.5624	39.9409		56.5	45
4418.95	40.9261	51.5623	39.9409		56.5	45
4422.1	40.9246	51.5623	39.9423		56.5	45
4425.25	40.9199	51.5618	39.9447		56.5	45
4428.4	40.9101	51.5608	39.951		56.5	45
4431.55	40.9005	51.5587	39.9617		56.5	45
4434.7	40.8894	51.5576	39.9701		56.5	45
4437.85	40.8835	51.5563	39.9736		56.5	45
4441	40.875	51.5562	39.9759		56.5	45
4444.15	40.8596	51.5541	39.9734		56.5	45
4447.3	40.8483	51.5519	39.9697		56.5	44.9
4450.45	40.8437	51.5556	39.968		56.5	44.9
4453.6	40.846	51.5575	39.9669		56.5	44.9
4456.75	40.8502	51.5566	39.965		56.5	44.9
4459.9	40.8525	51.5639	39.9661		56.5	44.9
4463.05	40.8533	51.5699	39.9708		56.5	44.9
4466.2	40.8519	51.5732	39.9795		56.5	44.9
4469.35	40.851	51.5758	39.9825		56.5	44.9
4472.5	40.8475	51.5751	39.9834		56.5	44.9
4475.65	40.8405	51.5685	39.9825		56.5	44.9
4478.8	40.8327	51.5604	39.9798		56.5	44.9
4481.95	40.8315	51.5624	39.9743		56.5	44.8
4485.1	40.8343	51.5601	39.9701		56.5	44.8
4488.25	40.8322	51.5496	39.9716		56.4	44.8
4491.4	40.8278	51.5411	39.9697		56.4	44.8
4494.55	40.8245	51.5392	39.9717		56.4	44.8
4497.7	40.8209	51.5339	39.9765			44.8
4500.85	40.8115	51.5303	39.9764			44.8
4504	40.804	51.5223	39.971			44.8
4507.15	40.7957	51.517	39.9693			44.8
4510.3	40.7867	51.5173	39.9726			44.8
4513.45	40.7828	51.5162	39.9774			44.7
4516.6	40.7791	51.5188	39.9845			44.7
4519.75	40.7819	51.5185	39.997			44.7
4522.9	40.7789	51.5157	40.0078			44.7
4526.05	40.7763	51.5175	40.0134			44.7
4529.2	40.778	51.5192	40.0174			44.7
4532.35	40.7735	51.5237	40.0137			44.7
4535.5	40.7708	51.5232	40.0035			44.7
4538.65	40.769	51.5195	39.9947			44.7
4541.8	40.7609	51.5184	39.9969			44.7
4544.95	40.7476	51.5105	40.0019			44.7
4548.1	40.7346	51.5036	40.0022			44.7
4551.25	40.728	51.5024	40.0027			44.7
4554.4	40.7244	51.5028	40.0076			44.7
4557.55	40.7174	51.5033	40.0048			44.7
4560.7	40.7114	51.5007	39.9972			44.7
4563.85	40.7073	51.503	39.9911			44.7
4567	40.7051	51.4995	39.9869			44.6
4570.15	40.7017	51.4911	39.9809			44.6
4573.3	40.6965	51.4901	39.9822			44.6
4576.45	40.6915	51.4838	39.9969			44.5
4579.6	40.6855	51.4752	40.0005			44.5
4582.75	40.6887	51.4685	40.0013			44.4
4585.9	40.6983	51.4586	40.0123
4589.05	40.7009	51.4515	40.0224
4592.2	40.6958	51.4445	40.0257
4595.35	40.694	51.4406	40.0288
4598.5	40.6931	51.4462	40.0329
4601.65	40.689	51.4437	40.0279
4604.8	40.6832	51.4417	40.0218
4607.95	40.68	51.443	40.0232
4611.1	40.6792	51.4412	40.0223
4614.25	40.68	51.4384	40.0197
4617.4	40.6827	51.4339	40.0212
4620.55	40.6837	51.4362	40.0282
4623.7	40.6766	51.4396	40.035
4626.85	40.6673	51.4382	40.0345
4630	40.656	51.4394	40.0314
4633.15	40.6464	51.4348	40.0287
4636.3	40.637	51.422	40.0231
4639.45	40.6256	51.4146	40.0183
4642.6	40.6161	51.4122	40.0179
4645.75	40.6081	51.4111	40.018
4648.9	40.6049	51.4073	40.0178
4652.05	40.6074	51.4045	40.0222
4655.2	40.6075	51.4065	40.0258
4658.35	40.6036	51.3961	40.0239
4661.5	40.5982	51.3863	40.0197
4664.65	40.598	51.3746	40.0213
4667.8	40.5924	51.3612	40.0303
4670.95	40.5843	51.3513	40.0352
4674.1	40.5827	51.3499	40.0345
4677.25	40.5796	51.3563	40.0375
4680.4	40.5758	51.3629	40.0373
4683.55	40.5768	51.3663	40.0365
4686.7	40.5732	51.3735	40.0369
4689.85	40.5635	51.3766	40.0294
4693	40.556	51.3731	40.0255
4696.15	40.5597	51.368	40.0216
4699.3	40.5586	51.3587	40.0267
4702.45	40.553	51.3495	40.0317
4705.6	40.5494	51.3419	40.0306
4708.75	40.548	51.3381	40.0318
4711.9	40.5446	51.3365	40.0342
4715.05	40.54	51.3324	40.0319
4718.2	40.5405	51.3308	40.0295
4721.35	40.5377	51.3357	40.0242
4724.5	40.5343	51.3373	40.0191
4727.65	40.5308	51.3331	40.015
4730.8	40.5301	51.3227	40.0165
4733.95	40.528	51.3058	40.0254
4737.1	40.5228	51.2862	40.0311
4740.25	40.5225	51.2678	40.0337
4743.4	40.5273	51.2534	40.0427
4746.55	40.5299	51.2413	40.0542
4749.7	40.5327	51.2315	40.063
4752.85	40.5334	51.2347	40.0695
4756	40.5306	51.2462	40.0691
4759.15	40.5207	51.2516	40.0649
4762.3	40.5139	51.2571	40.0658
4765.45	40.5132	51.2605	40.0649
4768.6	40.506	51.2615	40.0572
4771.75	40.4997	51.2625	40.0428
4774.9	40.4975	51.2562	40.0285
4778.05	40.4929	51.2456	40.0139
4781.2	40.485	51.2329	40.0075
4784.35	40.4767	51.22	40.0046
4787.5	40.4681	51.2188	40.0122
4790.65	40.4615	51.216	40.0422
4793.8	40.4535	51.2158	40.0906
4796.95	40.4594	51.2183	40.1377
4800.1	40.4687	51.2213	40.1879
4803.25	40.4688	51.2216	40.2277
4806.4	40.4697	51.2159	40.2505
4809.55	40.4698	51.212	40.2585
4812.7	40.4714	51.2034	40.2563
4815.85	40.4668	51.1884	40.2451
4819	40.4529	51.1795	40.2336
4822.15	40.446	51.1676	40.2278
4825.3	40.4383	51.1546	40.2231
4828.45	40.4359	51.1415	40.2144
4831.6	40.444	51.13	40.2082
4834.75	40.4456	51.1232	40.2048
4837.9	40.4445	51.1122	40.2013
4841.05	40.4409	51.1075	40.1957
4844.2	40.4375	51.1081	40.1913
4847.35	40.4321	51.1027	40.1844
4850.5	40.4169	51.0996	40.1744
4853.65	40.4068	51.0929	40.166
4856.8	40.4	51.0837	40.167
4859.95	40.3933	51.0755	40.1675
4863.1	40.394	51.0639	40.1641
4866.25	40.397	51.0616	40.1597
4869.4	40.3995	51.0608	40.1536
4872.55	40.4	51.0542	40.1458
4875.7	40.4024	51.0546	40.1358
4878.85	40.404	51.0575	40.1274
4882	40.4013	51.0584	40.1214
4885.15	40.3951	51.0553	40.1146
4888.3	40.3923	51.0495	40.1149
4891.45	40.3883	51.0492	40.1174
4894.6	40.3878	51.0493	40.1153
4897.75	40.3904	51.0517	40.1098
4900.9	40.3909	51.0557	40.1072
4904.05	40.3873	51.0541	40.1114
4907.2	40.3853	51.0503	40.116
4910.35	40.3867	51.049	40.1188
4913.5	40.3855	51.0482	40.1259
4916.65	40.377	51.0433	40.1276
4919.8	40.3737	51.0346	40.124
4922.95	40.37	51.0294	40.1199
4926.1	40.3654	51.0235	40.1117
4929.25	40.3626	51.017	40.101
4932.4	40.3605	51.0202	40.091
4935.55	40.353	51.0258	40.0847
4938.7	40.345	51.0264	40.0778
4941.85	40.3434	51.0276	40.0651
4945	40.3443	51.0249	40.0591
4948.15	40.3407	51.0204	40.0579
4951.3	40.3374	51.0066	40.0575
4954.45	40.3414	50.9897	40.0637
4957.6	40.3443	50.9759	40.0719
4960.75	40.3435	50.9582	40.0822
4963.9	40.3395	50.9448	40.0887
4967.05	40.336	50.94	40.0892
4970.2	40.3304	50.9367	40.0907
4973.35	40.3204	50.9377	40.0844
4976.5	40.3251	50.9436	40.0744
4979.65	40.3216	50.9496	40.0716
4982.8	40.3146	50.9489	40.0706
4985.95	40.3177	50.9516	40.0664
4989.1	40.3188	50.9599	40.0616
4992.25	40.3204	50.9654	40.0582
4995.4	40.3184	50.9632	40.0557
4998.55	40.3163	50.9575	40.0549
5001.7	40.3155	50.9466	40.0604
5004.85	40.3132	50.9355	40.0632
5008	40.3133	50.9264	40.0607
5011.15	40.3146	50.9213	40.0579
5014.3	40.3089	50.917	40.056
5017.45	40.3027	50.9086	40.0515
5020.6	40.2999	50.901	40.0431
5023.75	40.2994	50.8979	40.0374
5026.9	40.2991	50.8935	40.0384
5030.05	40.2964	50.8865	40.0384
5033.2	40.2965	50.8756	40.0414
5036.35	40.2978	50.8618	40.0442
5039.5	40.2951	50.8519	40.0405
5042.65	40.2958	50.8459	40.0322
5045.8	40.2952	50.8402	40.0265
5048.95	40.293	50.8318	40.0225
5052.1	40.2896	50.8228	40.0179
5055.25	40.2894	50.8201	40.0129
5058.4	40.2871	50.8196	40.0174
5061.55	40.2809	50.8143	40.0215
5064.7	40.2764	50.808	40.0239
5067.85	40.274	50.8012	40.0282
5071	40.273	50.7994	40.0315
5074.15	40.2743	50.7999	40.0315
5077.3	40.2785	50.8034	40.031
5080.45	40.2832	50.8108	40.0318
5083.6	40.2808	50.8146	40.0305
5086.75	40.2784	50.8173	40.0272
5089.9	40.2769	50.8167	40.0251
5093.05	40.2747	50.8071	40.027
5096.2	40.2695	50.7902	40.0293
5099.35	40.2657	50.7714	40.0316
5102.5	40.2672	50.7573	40.0344
5105.65	40.2699	50.7513	40.0356
5108.8	40.272	50.7488	40.0348
5111.95	40.2706	50.7501	40.035
5115.1	40.2691	50.7516	40.0372
5118.25	40.2653	50.7521	40.0384
5121.4	40.2612	50.7521	40.0376
5124.55	40.2596	50.7446	40.0412
5127.7	40.2568	50.7361	40.0454
5130.85	40.256	50.7278	40.0492
5134	40.2557	50.7207	40.0491
5137.15	40.255	50.7267	40.0473
5140.3	40.2565	50.7325	40.0451
5143.45	40.2541	50.7324	40.0414
5146.6	40.2486	50.7331	40.0385
5149.75	40.2434	50.7333	40.0388
5152.9	40.2384	50.7387	40.0391
5156.05	40.2334	50.7438	40.0382
5159.2	40.2282	50.7411	40.0422
5162.35		50.7382	40.0424
5165.5		50.7315	40.0388
5168.65		50.7291	40.0326
5171.8		50.7248	40.0296
5174.95		50.7113	40.0275
5178.1		50.6938	40.0228
5181.25		50.6796	40.0218
5184.4		50.667	40.0278
5187.55		50.6567	40.0319
5190.7		50.6461	40.0378
5193.85		50.6403	40.0435
5197		50.633	40.0449
5200.15		50.63	40.0413
5203.3		50.6335	40.0383
5206.45		50.6347	40.0357
5209.6		50.6311	40.0272
5212.75		50.6246	40.0186
5215.9		50.6205	40.0215
5219.05		50.6157	40.0269
5222.2		50.6082	40.0334
5225.35		50.6045	40.0381
5228.5		50.5959	40.0399
5231.65		50.5853	40.0379
5234.8		50.5856	40.0371
5237.95		50.5835	40.0388
5241.1		50.5789	40.0335
5244.25		50.5736	40.0265
5247.4		50.5689	40.0237
5250.55		50.5674	40.0245
5253.7		50.5653	40.0225
5256.85		50.5567	40.0152
5260		50.5493	40.0084
5263.15		50.5415	40.0051
5266.3		50.5367	40.0015
5269.45		50.5355	40.0016
5272.6		50.53	40.0064
5275.75		50.523	40.0088
5278.9		50.512	40.0057
5282.05		50.5066	40.0041
5285.2		50.5029	40.006
5288.35		50.4975	40.007
5291.5		50.4966	40.006
5294.65		50.4999	40.0091
5297.8		50.5022	40.0115
5300.95		50.504	40.0086
5304.1		50.5027	40.0034
5307.25		50.4993	39.994
5310.4		50.4926	39.9804
5313.55		50.4878	39.9666
5316.7		50.4912	39.9612
5319.85		50.4936	39.9628
5323		50.492	39.965
5326.15		50.4917	39.9664
5329.3		50.4868	39.9758
5332.45		50.4771	39.9798
5335.6		50.4608	39.9773
5338.75		50.4491	39.9704
5341.9		50.4377	39.9662
5345.05		50.4288	39.9633
5348.2		50.4303	39.962
5351.35		50.4375	39.9632
5354.5		50.438	39.962
5357.65		50.4291	39.9575
5360.8		50.4111	39.9589
5363.95		50.397	39.9655
5367.1		50.383	39.9678
5370.25		50.3705	39.9689
5373.4		50.3695	39.9699
5376.55		50.3801	39.9723
5379.7		50.3973	39.9697
5382.85		50.4071	39.9673
5386		50.409	39.9689
5389.15		50.3994	39.9653
5392.3		50.3853	39.9577
5395.45		50.3728	39.9552
5398.6		50.3677	39.9542
5401.75		50.3643	39.9489
5404.9		50.3606	39.9432
5408.05		50.3596	39.947
5411.2		50.348	39.9521
5414.35		50.3288	39.9528
5417.5		50.3052	39.9547
5420.65		50.2758	39.9487
5423.8		50.2491	39.9424
5426.95		50.2319	39.9403
5430.1		50.2278	39.9412
		50.2141	39.9362
		50.1995	39.9271
		50.1865	39.9205
		50.167	39.9192
		50.1386	39.9119
		50.1224	39.9013
		50.1299	39.8984
		50.1102	39.8948
		50.0817	39.891
		50.0531	39.89
		50.0272	39.8938
		49.9895	39.8976
		49.9621	39.9031
		49.9517	39.9162
		49.9545	39.9299
		49.9628	39.9373
		49.972	39.9413
		49.9795	39.944
			39.9417
			39.9327
			39.9196
			39.91
			39.8991
			39.8939
			39.8964
			39.8965
			39.8947
			39.8986
			39.9035
			39.9093
			39.9119
			39.9141
			39.9194
			39.9124
			39.9102
			39.9063
			39.8973
			39.89
			39.8881
			39.8869
			39.8842
			39.8765
			39.8691
			39.8579
			39.8465
			39.8411
			39.8354
			39.8285
			39.822
			39.8161
			39.8067
			39.7903
			39.7772
			39.7698
			39.7635
			39.7611
			39.7637
			39.7616
			39.7546
			39.7491
			39.743
			39.7324
			39.7236
			39.7154
			39.7137
			39.7112
			39.7044
			39.6995
			39.6946
			39.6928
			39.6947
			39.695
			39.6897
			39.6837
			39.6824
			39.6775
			39.669
			39.6626
			39.6582
			39.6537
			39.6515
			39.6498
			39.6458
			39.6425
			39.6455
			39.6491
			39.6501
			39.6486
			39.6445
			39.6419
			39.6369
			39.6346
			39.6371
			39.6375
			39.6444
			39.6527
			39.6577
			39.6594
			39.6576
			39.652
			39.6415
			39.6199
			39.5995
			39.5811
			39.5615
			39.549
			39.5438
			39.5463
			39.5543
			39.5649
			39.5735
			39.5742
			39.5724
			39.5715
			39.5694
			39.5652
			39.5615
			39.5568
			39.5522
			39.5478
			39.5436
			39.5396
